# Supplementary material
Source: PubMed Central journal article supplement (PMC9343414)
Supplement: 41422_2022_678_MOESM1_ESM.pdf [file 41422_2022_678_MOESM1_ESM.pdf]

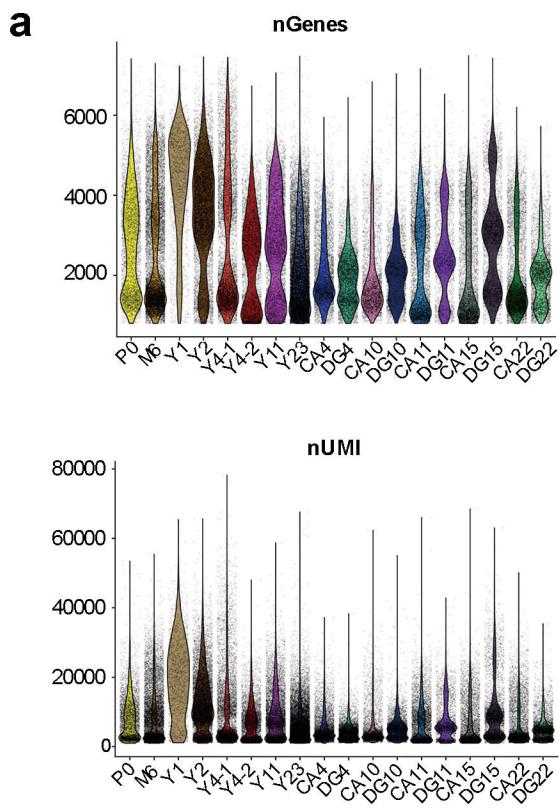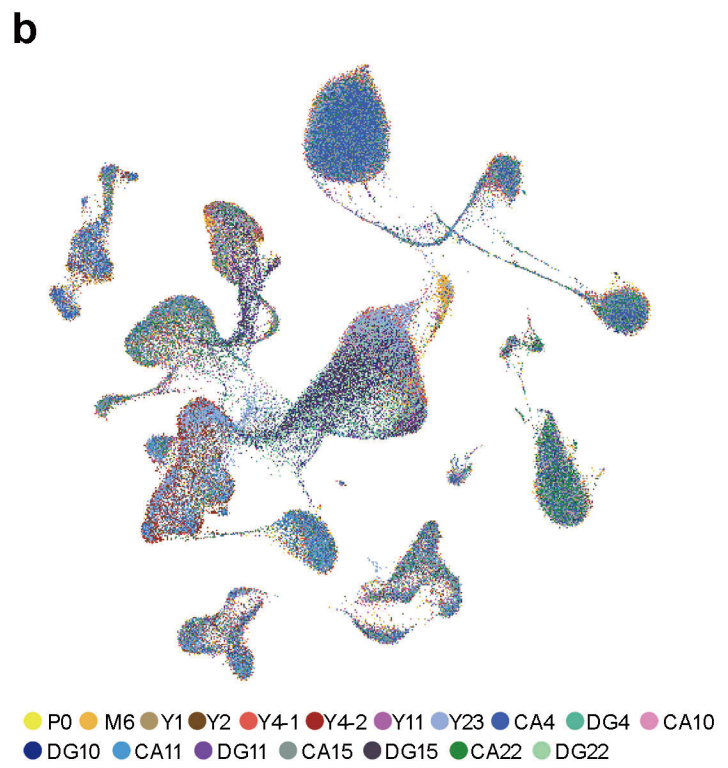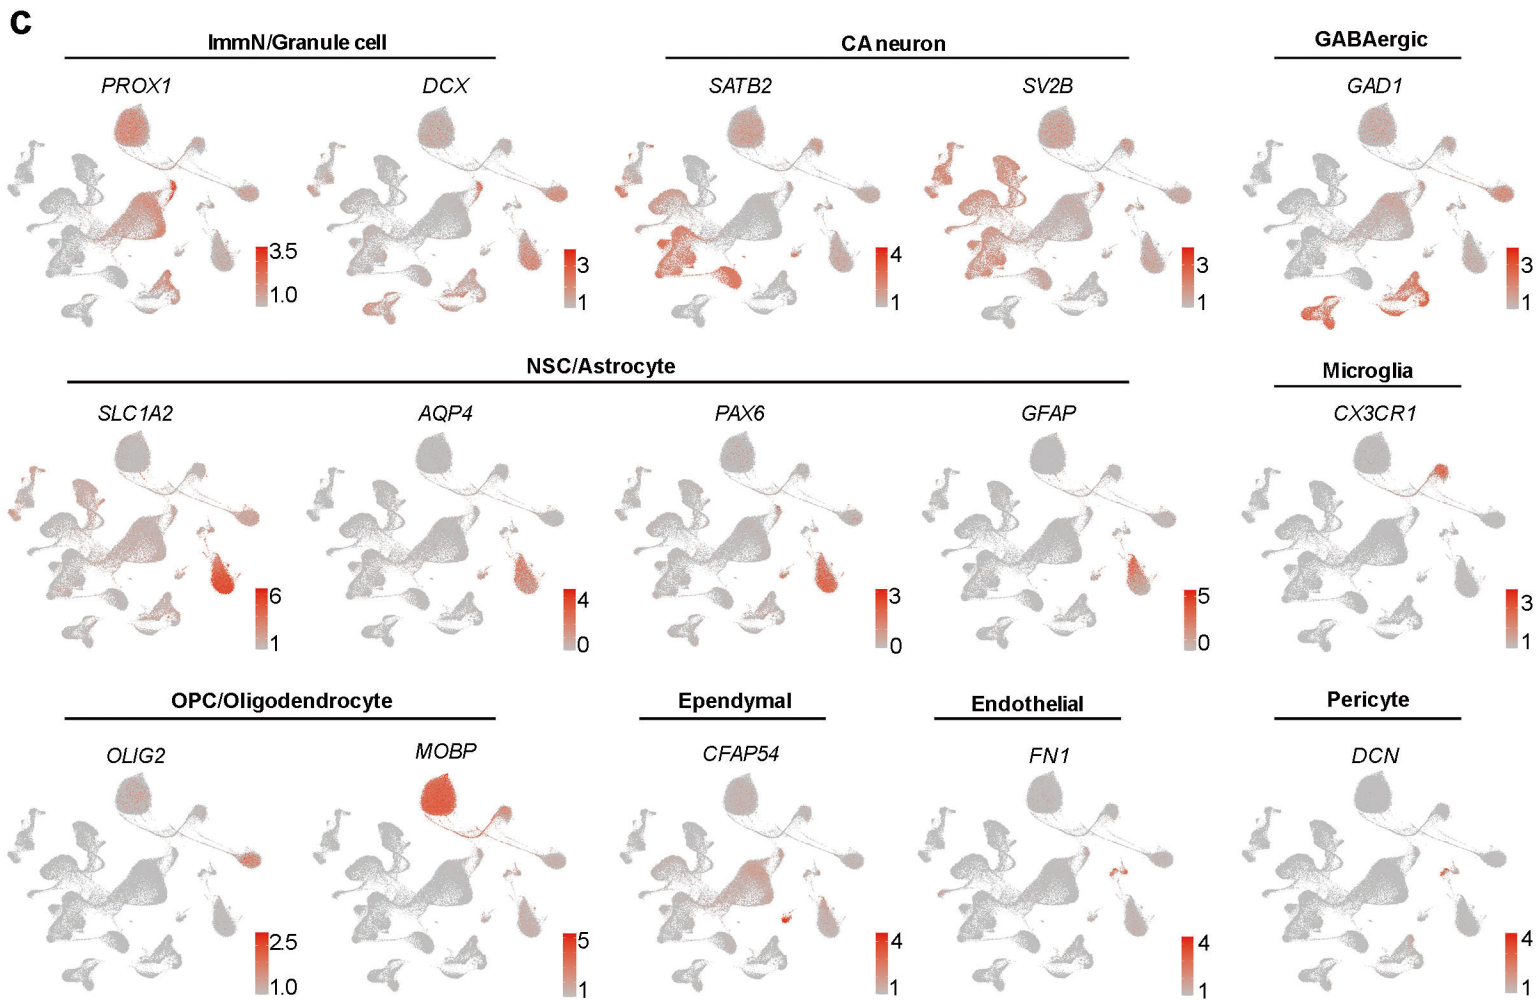

**Fig. S1 Transcriptional features of macaque hippocampi, related to Fig. 1**

**a** Quality control metrics for macaque hippocampal samples; each dot represents a single cell. Cells with gene numbers per cell (nGene)  $< 800$  and  $> 7500$  (upper panel), as well as nUMI  $< 1000$  (lower panel), were excluded from the subsequent analysis.

**b** UMAP showing the cell distribution in 13 samples. Cells are colored by sample.

**c** The expression of well-known marker genes for major cell types was visualized using UMAP.
