# Supplementary material
Source: PubMed Central journal article supplement (PMC9343414)
Supplement: 41422_2022_678_MOESM2_ESM.pdf [file 41422_2022_678_MOESM2_ESM.pdf]

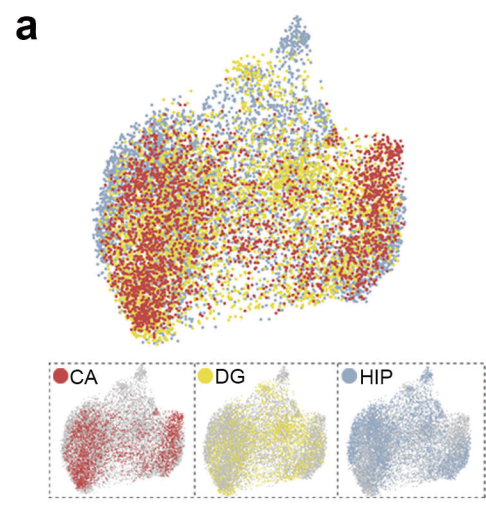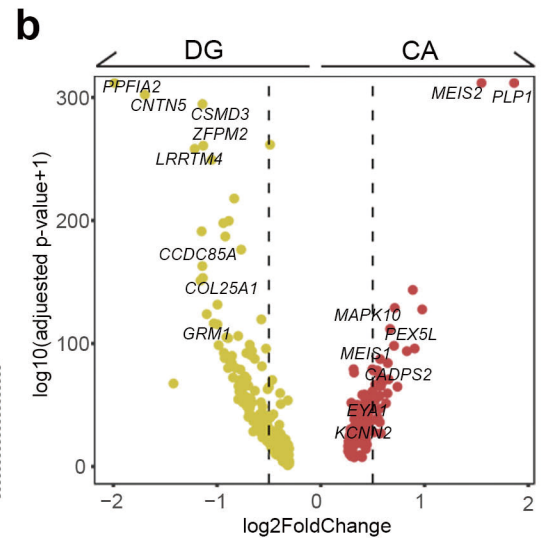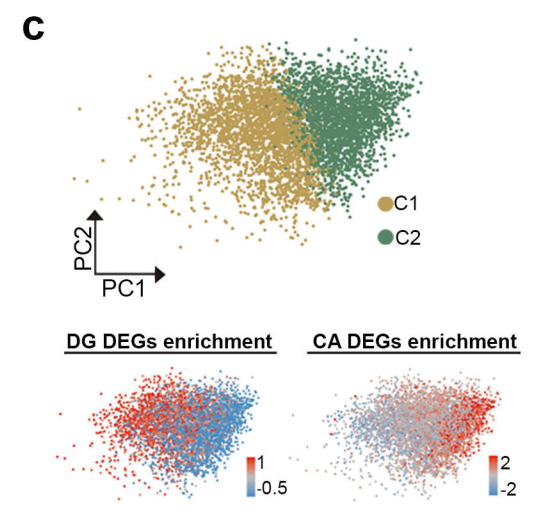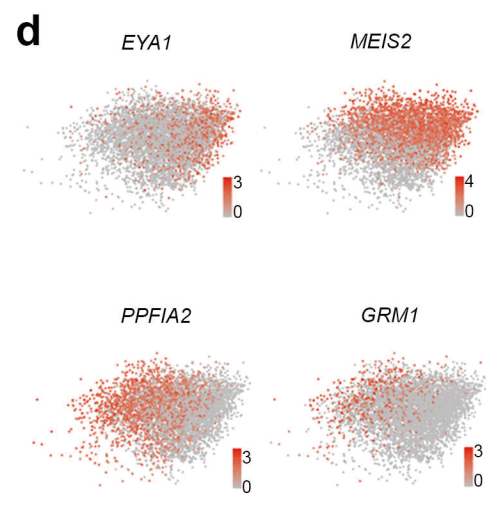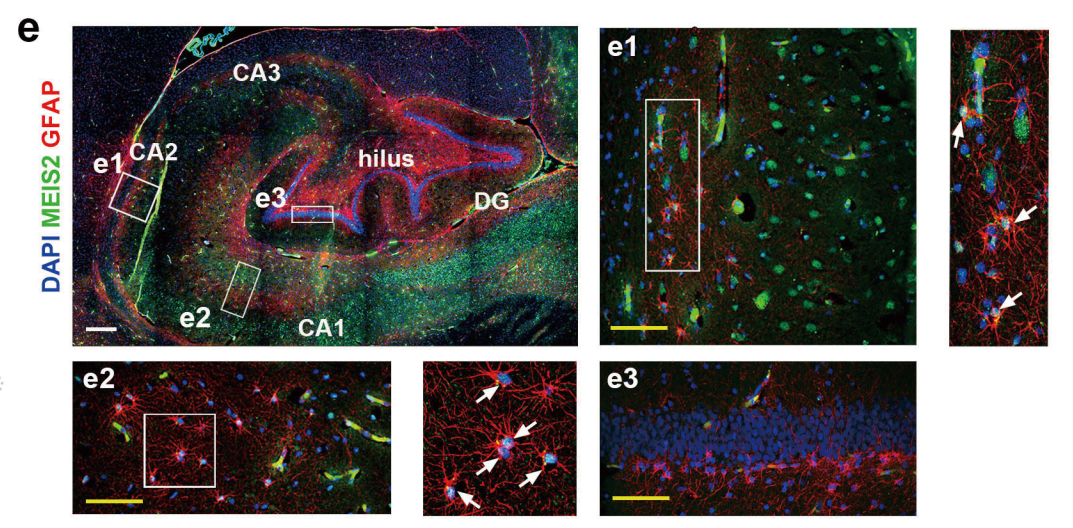

**Fig. S2 Regional transcriptional profiles of astrocytes in the macaque hippocampus, related to Fig. 1**

**a** Visualization of the cell distribution obtained from individual dissection of the CA, DG and whole hippocampus.

**b** Volcano plot showing the regional differentially expressed genes.

**c** Clustering of astrocytes from whole hippocampi into two groups via PCA reduction (upper panel). Projection of the enrichment score of the regional differentially expressed genes from CA and DG onto the PCA plot (lower panel).

**d** PCA plot showing the expression of DG-enriched genes (*PPFIA2* and *GRIM1*) and CA-enriched genes (*EYA1* and *MEIS2*).

**e** GFAP is expressed in both the CA and DG regions and coexpressed with MEIS2 in the CA region (e1 and e2) but not in the DG region (e3). The arrows indicate GFAP/MEIS2 double-positive cells. Scale bar in white: 500  $\mu\text{m}$ , scale bar in yellow: 50  $\mu\text{m}$ .
