# Supplementary material
Source: PubMed Central journal article supplement (PMC9343414)
Supplement: 41422_2022_678_MOESM3_ESM.pdf [file 41422_2022_678_MOESM3_ESM.pdf]

# Mice

**a**

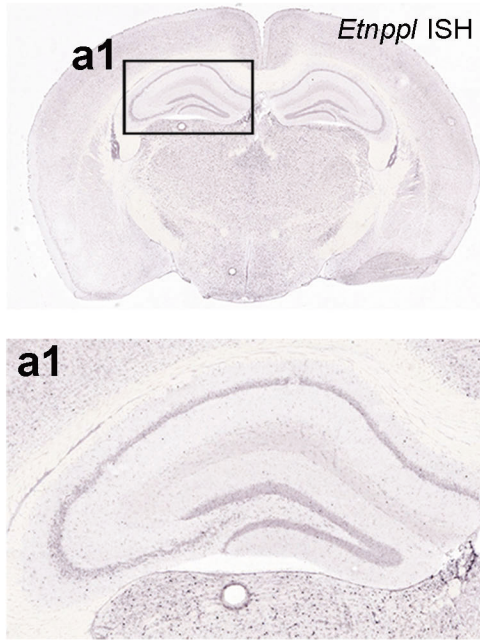

**b**

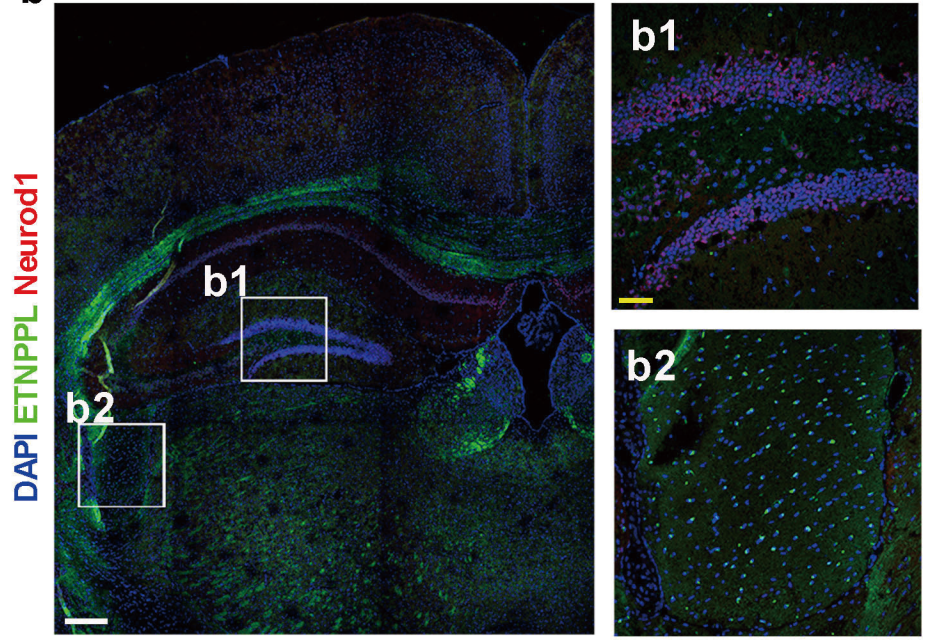

# Macaque

**c**

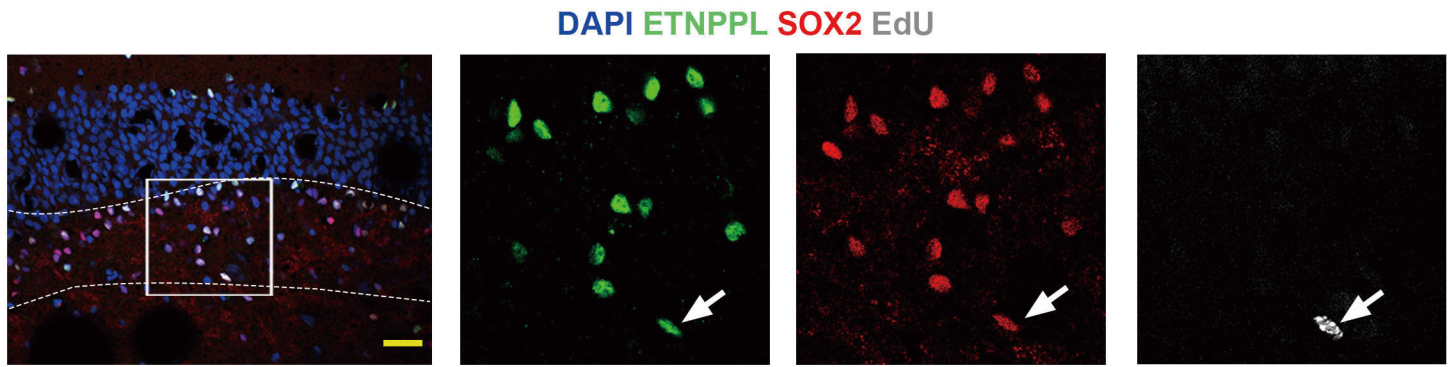

**d**

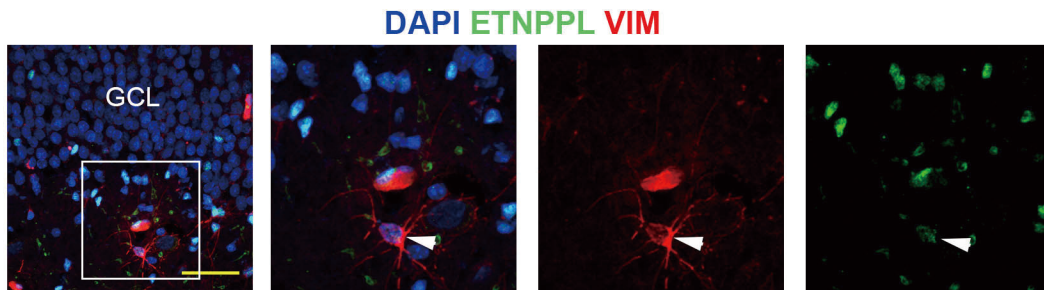

**e**

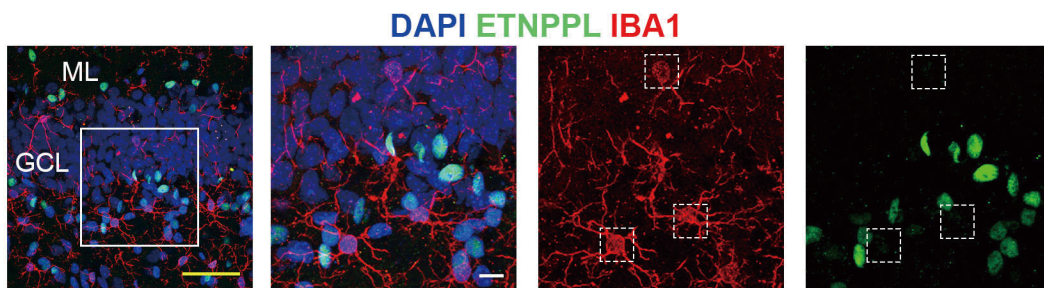

**f**

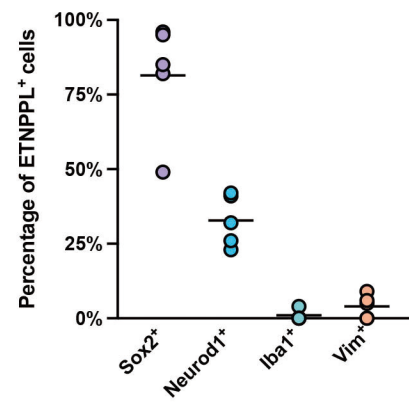

**Fig. S3 *ETNPPL* is a primate-specific NSC marker but is not expressed in mice, related to Fig. 2**

- a** ETNPPL is absent in the adult mouse hippocampus, according to the Allen ISH database.
- b** Immunofluorescence staining results show that ETNPPL was absent in the mouse hippocampus (b1) but detected in the fornix (b2).
- c-e** Colocalization analysis of ETNPPL with the classic NSC marker SOX2 (c), Vim (d), and microglial marker IBA1 (e).
- f** Quantification result of ETNPPL colabeled with SOX2, NeuroD1, IBA1, and Vim.
