# Supplementary material
Source: PubMed Central journal article supplement (PMC9343414)
Supplement: 41422_2022_678_MOESM4_ESM.pdf [file 41422_2022_678_MOESM4_ESM.pdf]

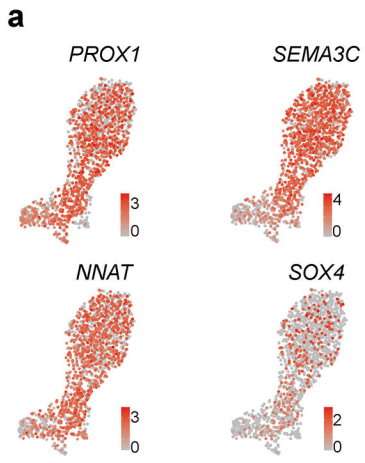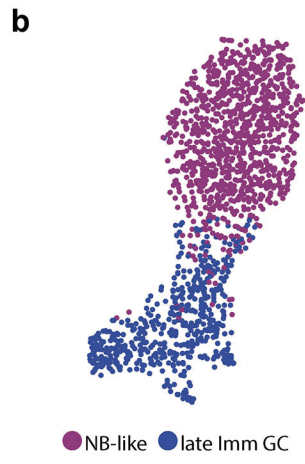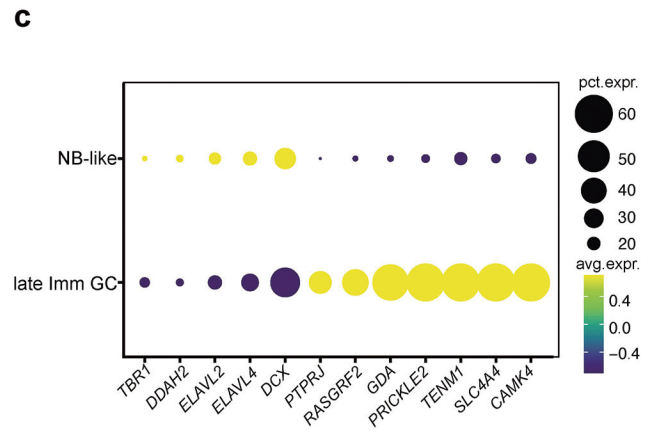

**Fig. S4 Immature neurons contains neuroblasts and late immature granule cells, related to Fig.3**

**a** The expression pattern of immature neuronal markers in ImmN cluster.

**b** ImmN cluster is subdivided into NB-like and Late-ImmGC clusters.

**c** Representative genes preferentially express in NB-like and Late-ImmGC clusters.
