# Supplementary material
Source: PubMed Central journal article supplement (PMC9343414)
Supplement: 41422_2022_678_MOESM5_ESM.pdf [file 41422_2022_678_MOESM5_ESM.pdf]

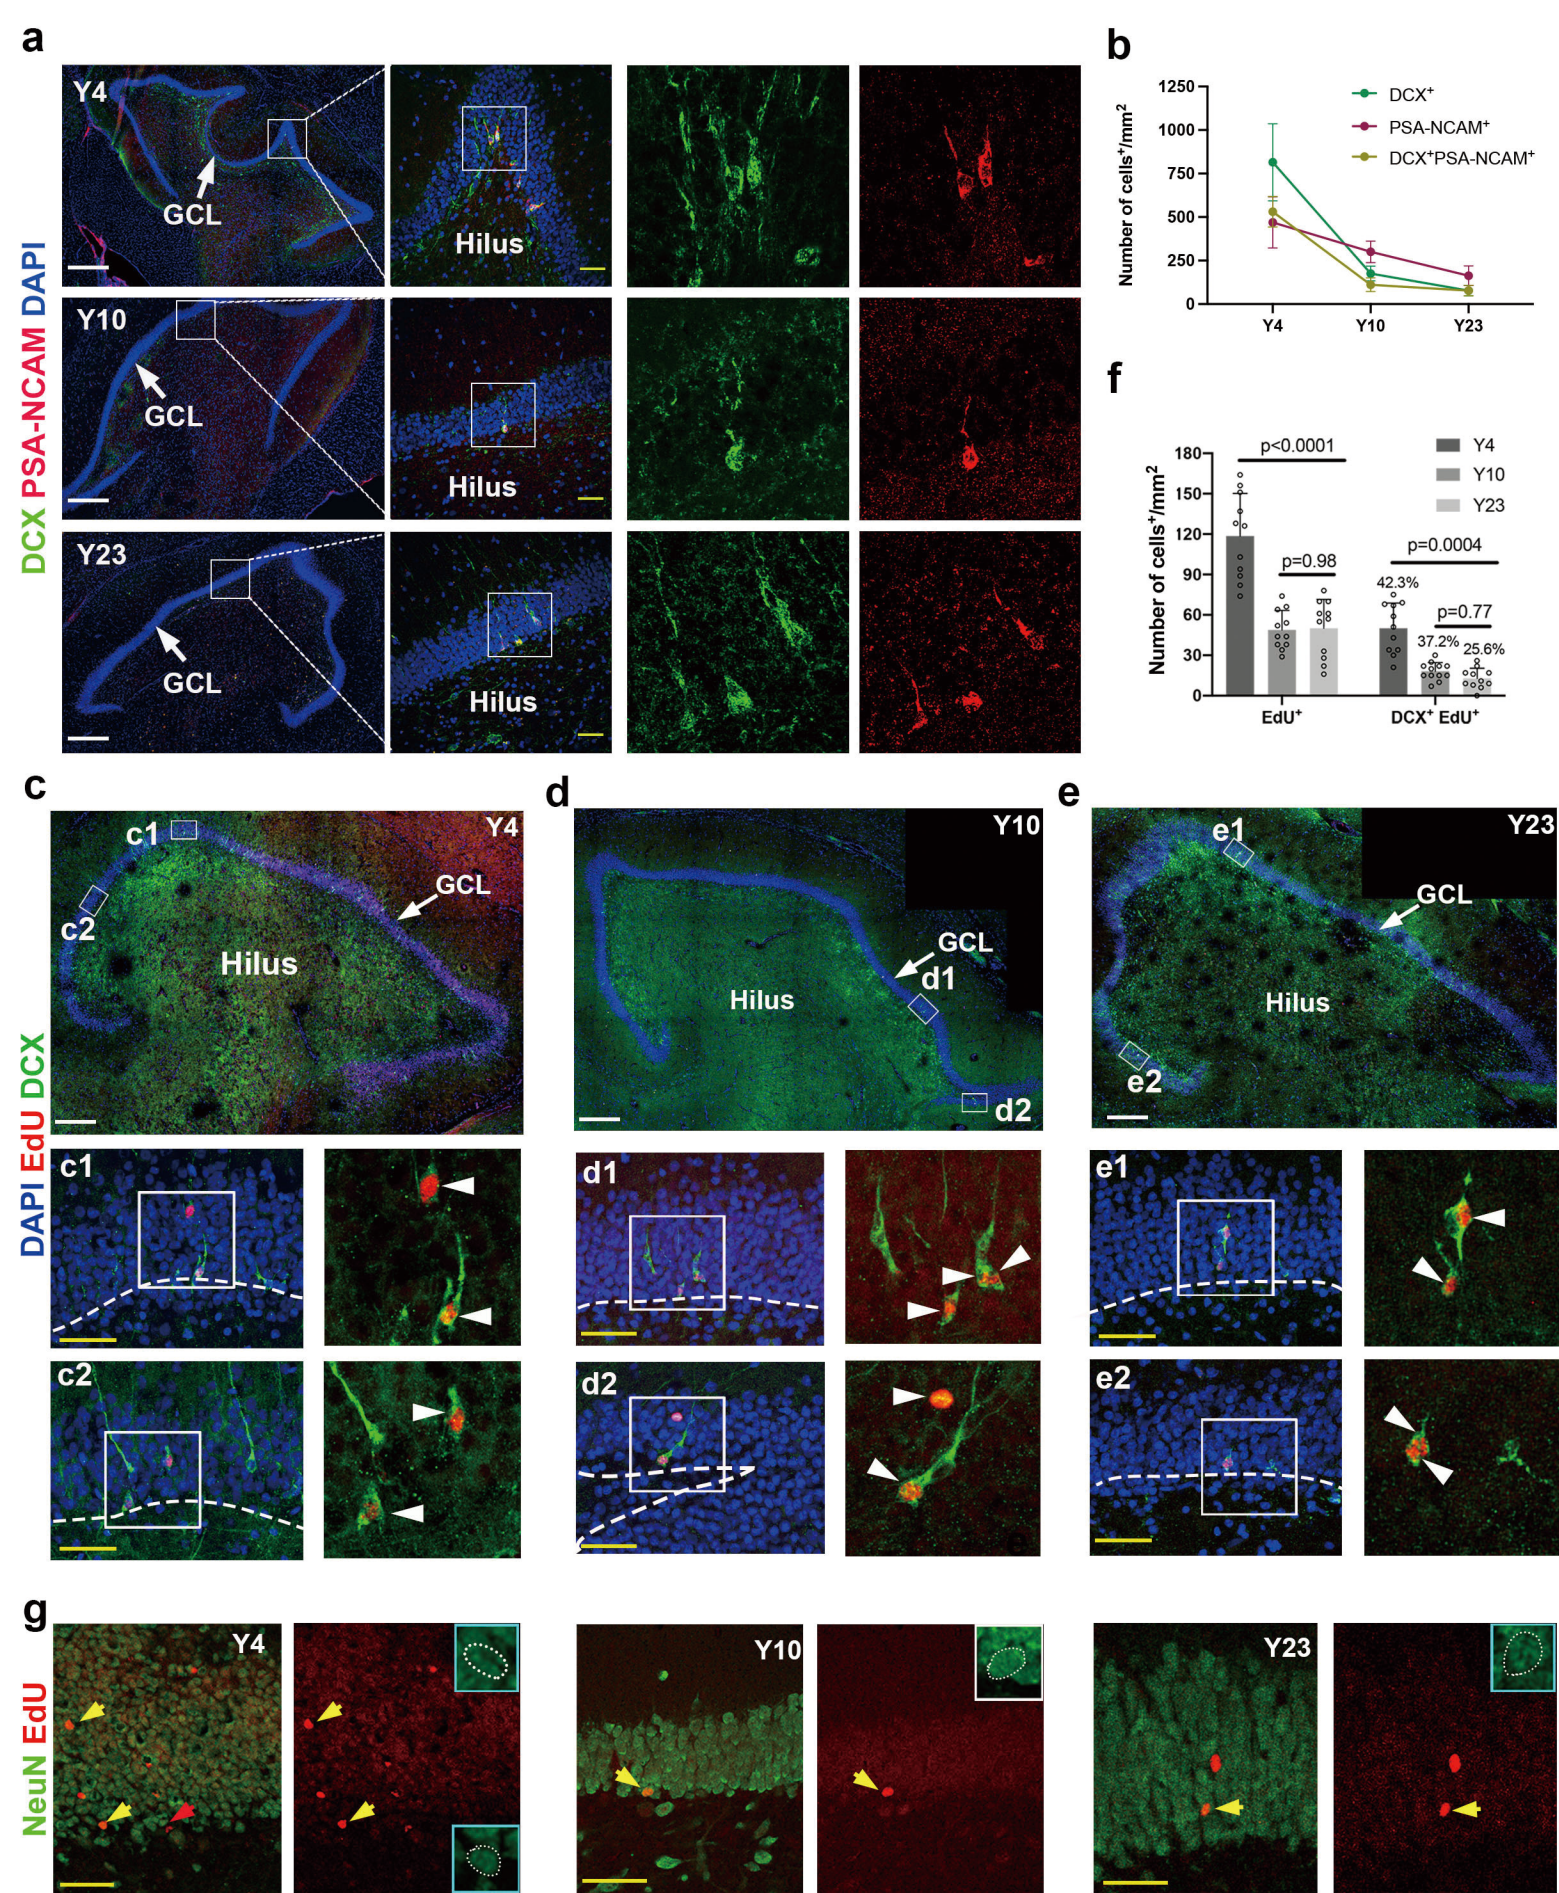

**Fig. S5 Adult neurogenesis continues in adult and aged macaques, related to Fig. 3**

**a** Cryostat sections showing DCX and PSA-NCAM immunostaining in the DG of hippocampi from macaques aged 4, 10, and 23 years. Scale bar in white: 500  $\mu\text{m}$ , scale bar in yellow: 50  $\mu\text{m}$ .

**b** Quantification result of DCX and PSA-NCAM staining.

**c-e** New neurons are persistently generated in the DG of the hippocampus in adult and aged macaques, as illustrated by EdU labeling and DCX staining. The arrowhead in each insert shows the colocalization of EdU and DCX. Scale bar in white: 500  $\mu\text{m}$ , scale bar in yellow: 50  $\mu\text{m}$ .

**f** Quantification of EdU<sup>+</sup> and DCX+EdU<sup>+</sup> double-positive cells in the DG of the hippocampi of adult and aged macaques.

**g** NEUN and EdU cells are visualized in the GCL, and yellow arrows highlight the double-positive cells. Scale bar in yellow: 50  $\mu\text{m}$ .
