# Supplementary material
Source: PubMed Central journal article supplement (PMC9343414)
Supplement: 41422_2022_678_MOESM6_ESM.pdf [file 41422_2022_678_MOESM6_ESM.pdf]

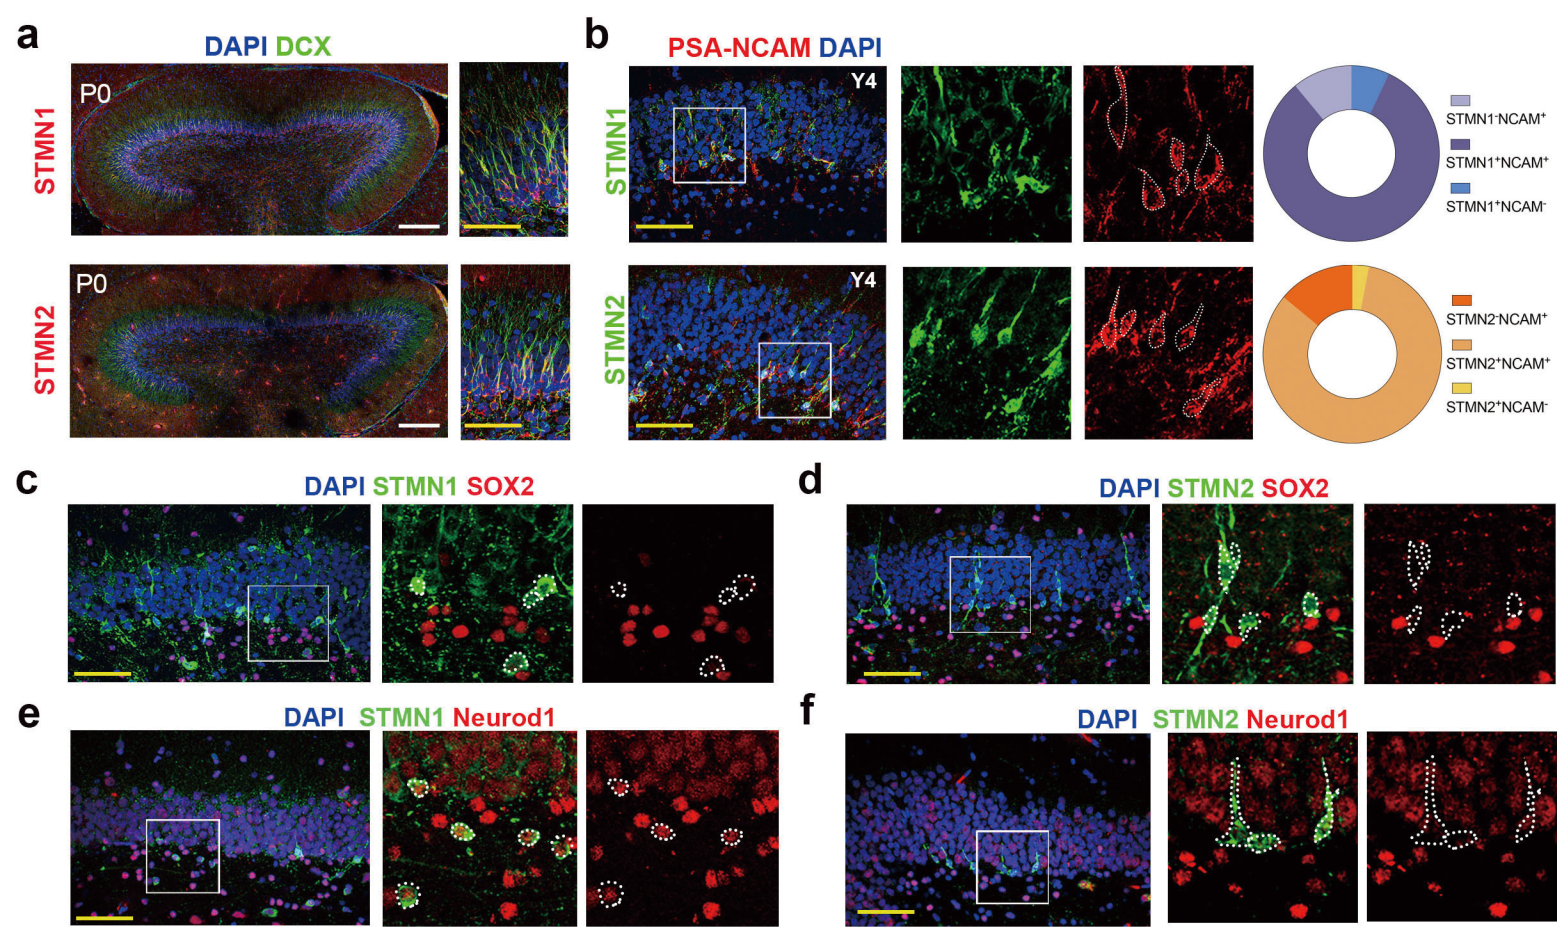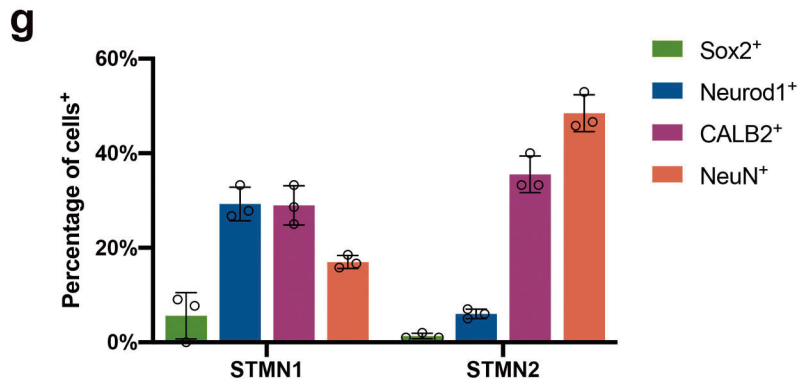

**Fig. S6 STMN1 and STMN2 are markers for immature granule cells, related to Fig. 3**

**a** Expression of STMN1 (upper panel) and STMN2 (lower panel) with DCX in the DG of the hippocampi in P0 macaque brains.

**b** Colocalization analysis of STMN1 (upper panel) and STMN2 (lower panel) with PSA-NCAM showing that more than 80% of cells were double positive.

**c, d** Colocalization analysis of STMN1 (c) and STMN2 (d) with SOX2. The dashed circles show SOX2-negative signals.

**e, f** Colocalization analysis of STMN1 (e) and STMN2 (f) with NeuroD1.

The dashed circles show NeuroD1-negative signals. Scale bar in white: 500  $\mu\text{m}$ , scale bar in yellow: 50  $\mu\text{m}$ .

**g** Quantification analysis of STMN1 and STMN2 with SOX2, NeuroD1, CALB2, and NeuN.
