# Supplementary material
Source: PubMed Central journal article supplement (PMC9343414)
Supplement: 41422_2022_678_MOESM7_ESM.pdf [file 41422_2022_678_MOESM7_ESM.pdf]

**a**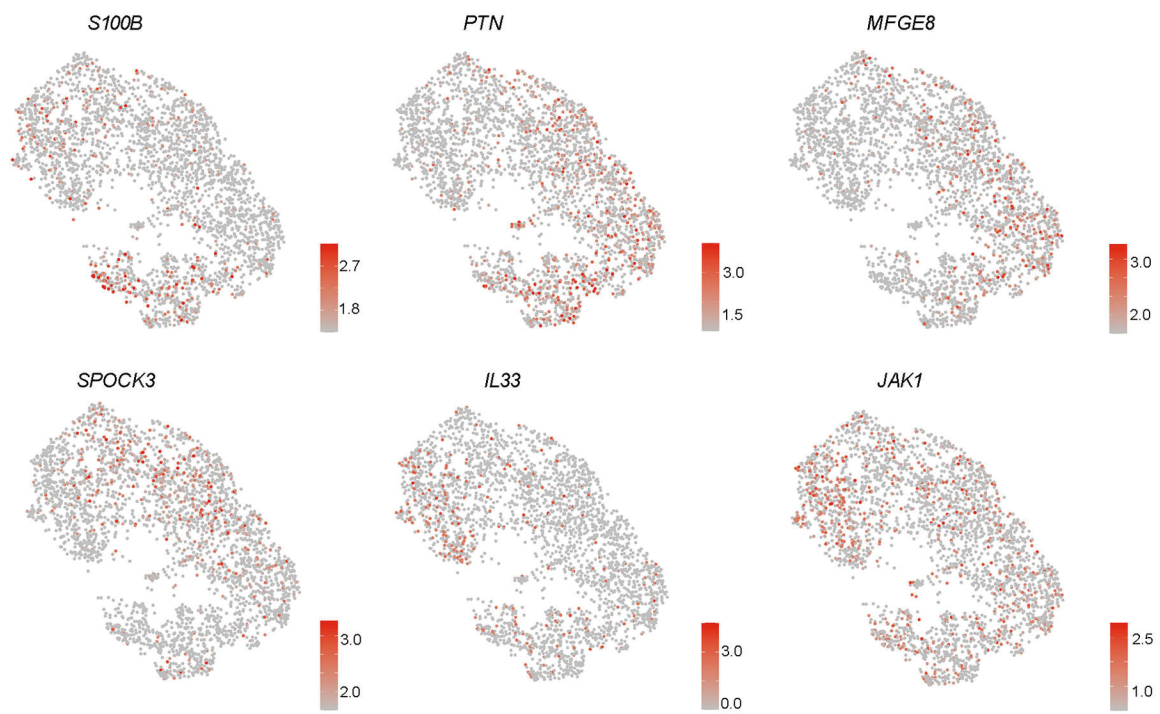**b**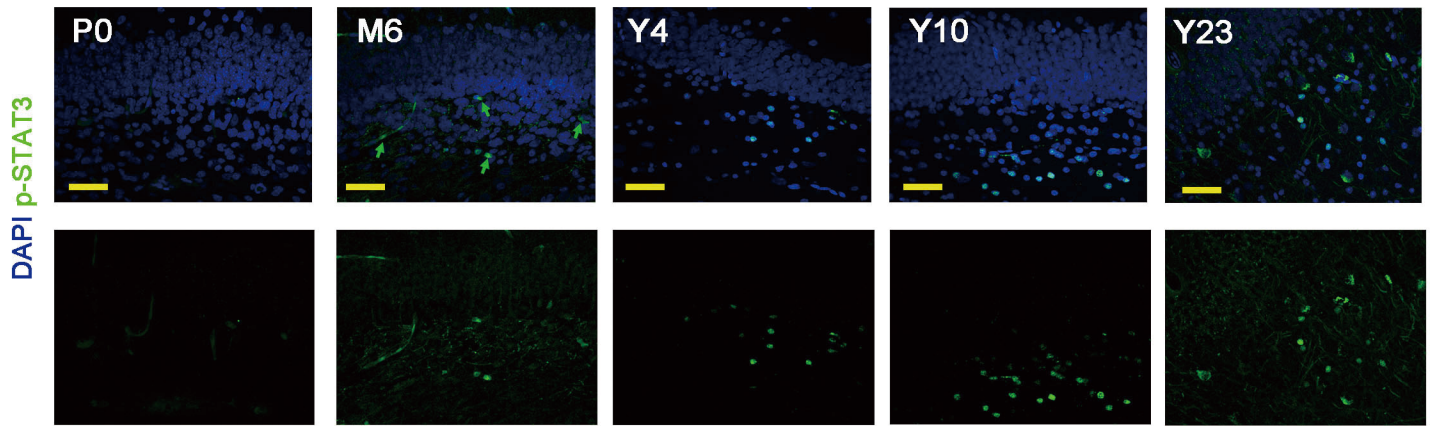**c**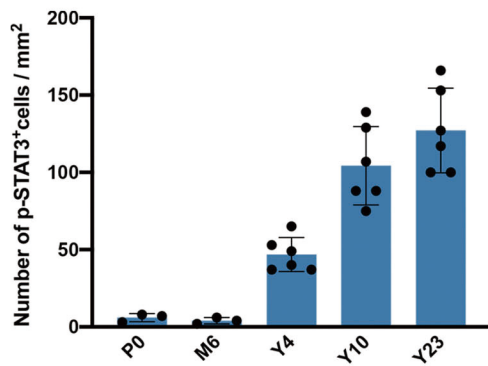**d**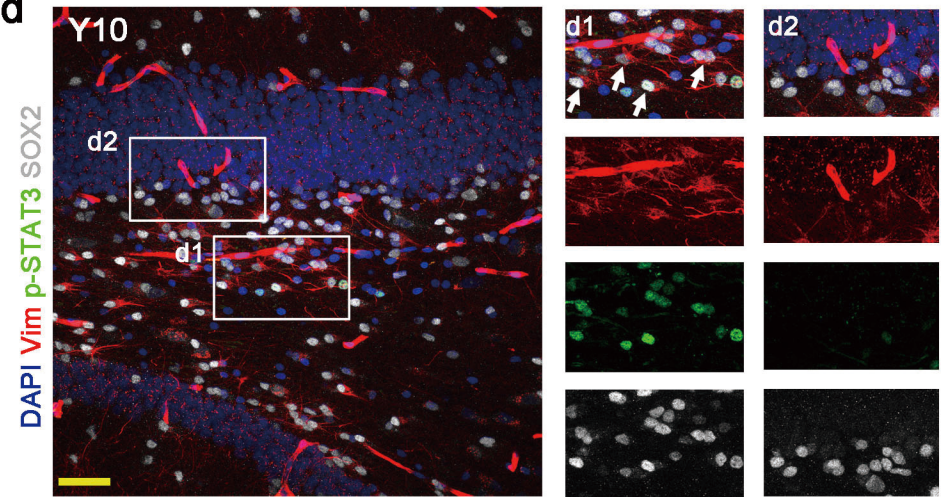**e**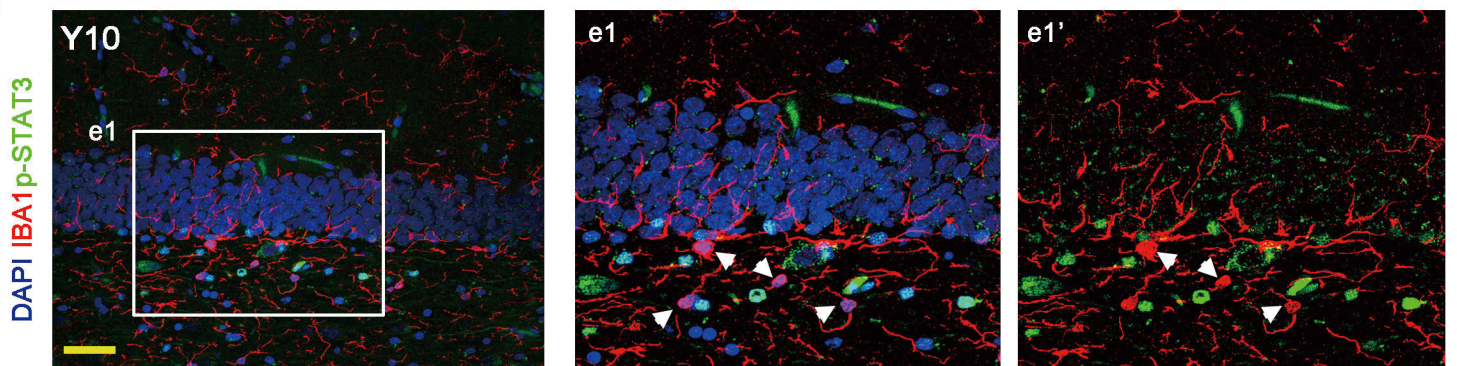

**Fig. S7 Diversity of macaque astrocytes, related to Fig. 4**

**a** UMAP showing the expression of astrocyte subtype-specific genes.

**b** Immunostaining results of p-STAT3 at distinct ages. Scale bar in yellow: 50 $\mu$ m.

**c** Quantification result of p-STAT3 positive cells at distinct ages.

**d, e** Costaining p-STAT3 with with Vim, SOX2 (d), and IBA1(e). Scale bar in yellow: 50 $\mu$ m.
