# Supplementary material
Source: PubMed Central journal article supplement (PMC9343414)
Supplement: 41422_2022_678_MOESM8_ESM.pdf [file 41422_2022_678_MOESM8_ESM.pdf]

**a** Microglia regional differentially expressed genes

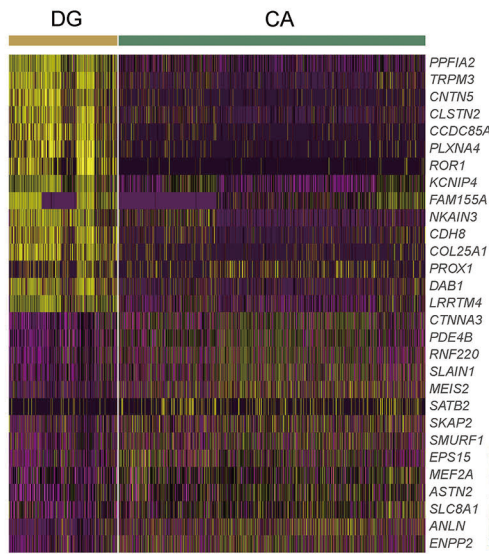

*PPFIA2*  
*TRPM3*  
*CNTN5*  
*CLSTN2*  
*CCDC85A*  
*PLXNA4*  
*ROR1*  
*KCNIP4*  
*FAM155A*  
*NKAIN3*  
*CDH8*  
*COL25A1*  
*PROX1*  
*DAB1*  
*LRRTM4*  
*CTNNA3*  
*PDE4B*  
*RNF220*  
*SLAIN1*  
*MEIS2*  
*SATB2*  
*SKAP2*  
*SMURF1*  
*EPS15*  
*MEF2A*  
*ASTN2*  
*SLC8A1*  
*ANLN*  
*ENPP2*

Expression  
 2  
 1  
 0  
 -1  
 -2

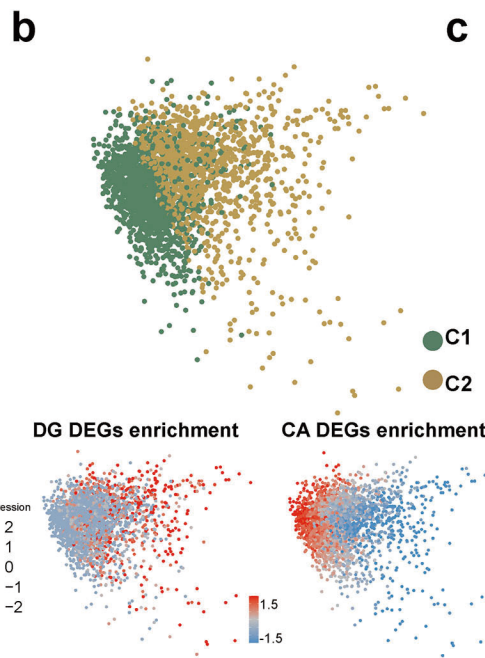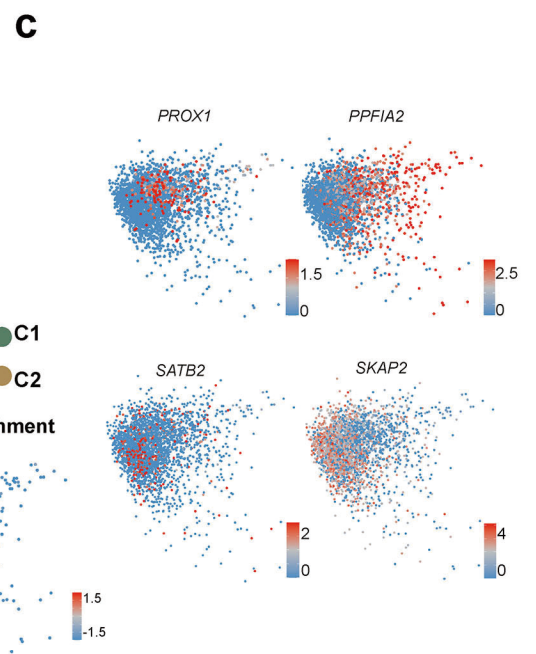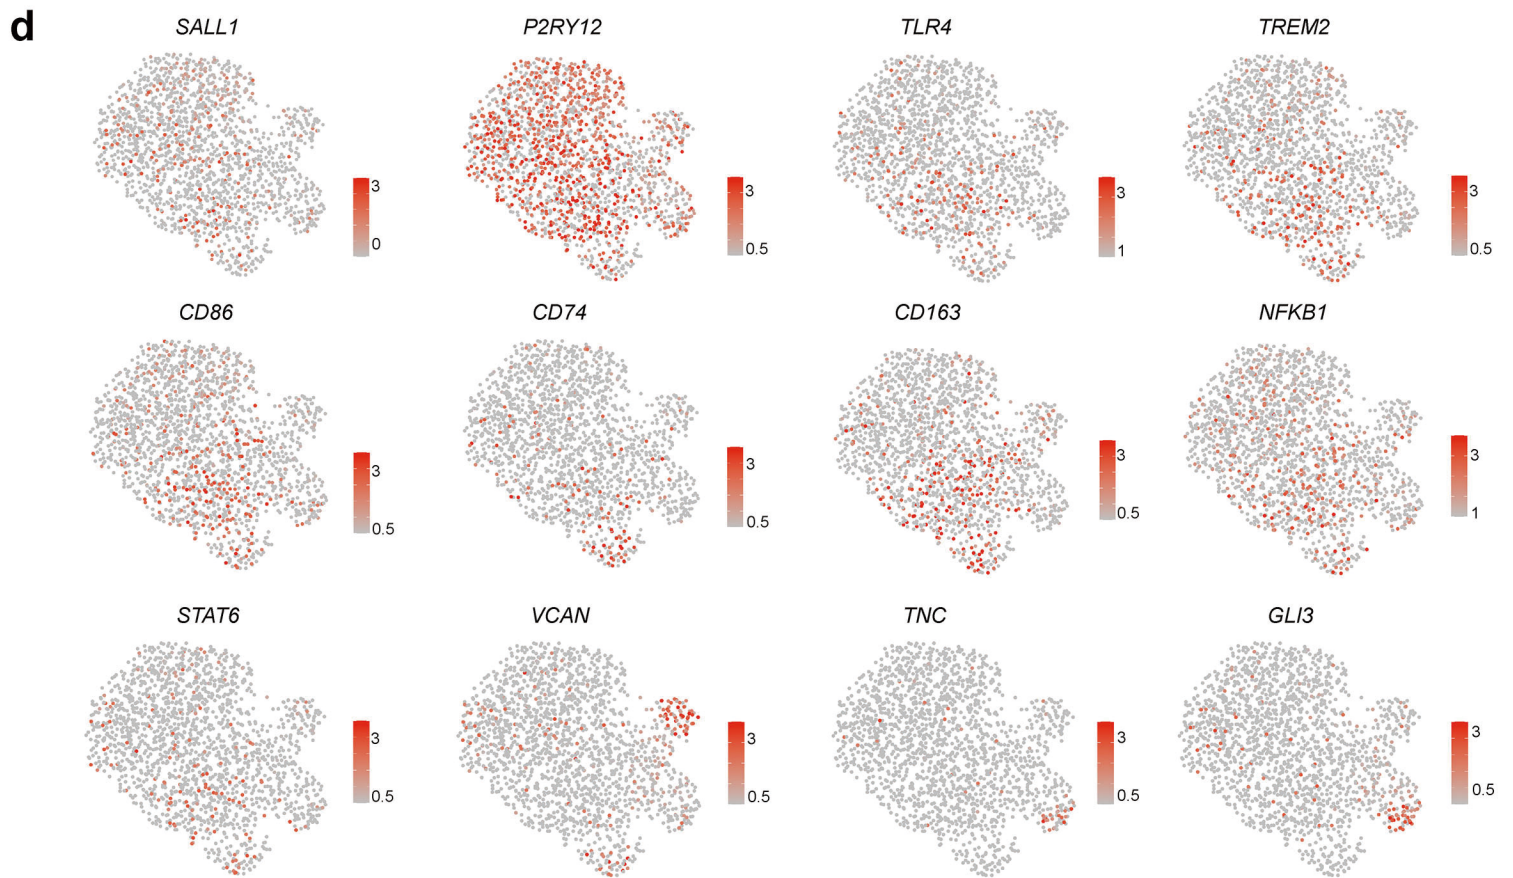

**Fig. S8 Regional transcriptional profiles of microglia in the macaque hippocampus, related to Fig. 4**

- a** Heatmap illustrating differentially expressed genes between microglial cells from the CA and DG.
- b** Clustering of microglia from whole hippocampi into two groups via PCA reduction (upper panel). Visualization of the enrichment score of regional differentially expressed genes from the CA and DG via a PCA plot (lower panel).
- c** PCA plot showing the expression of DG-enriched genes (*PROX1* and *PPFIA2*) and CA-enriched genes (*SATB2* and *SKAP2*).
- d** UMAP showing the expression of microglial subtype-specific genes.
