# Supplementary material
Source: PubMed Central journal article supplement (PMC9343414)
Supplement: 41422_2022_678_MOESM9_ESM.pdf [file 41422_2022_678_MOESM9_ESM.pdf]

**SOX2 ETNPPL DAPI**

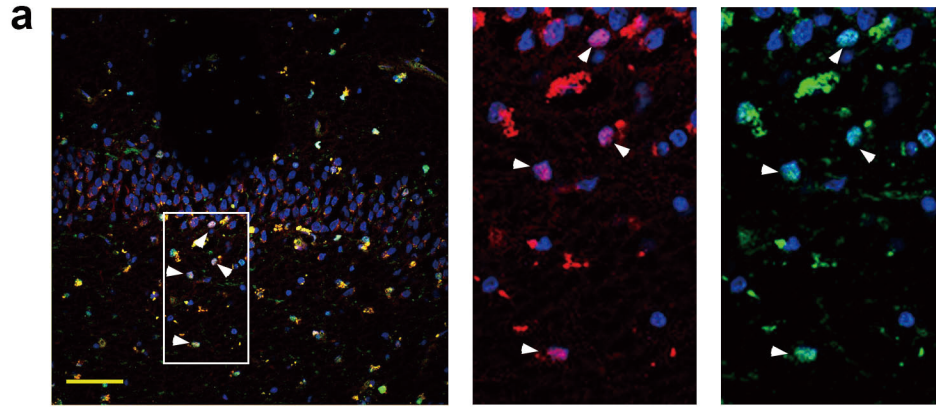

**b**

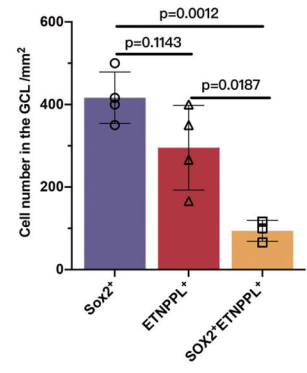

**c**

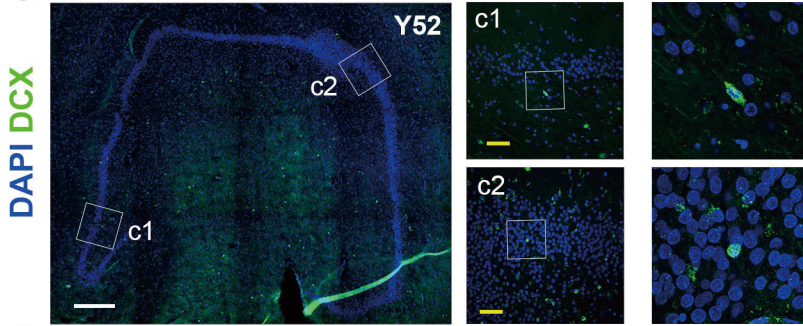

**d**

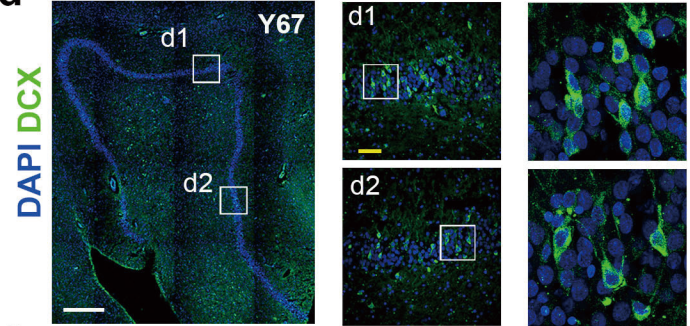

**e**

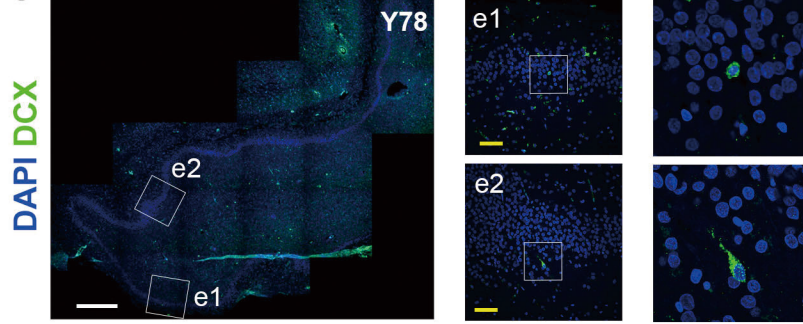

**f**

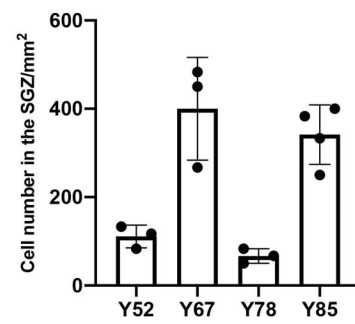

**g**

**STMN1 NEUROD1 DAPI**

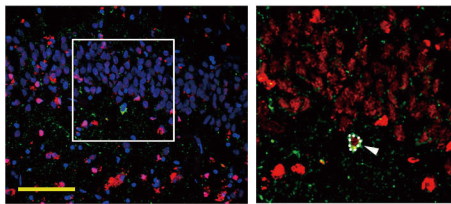

**h**

**STMN2 NEUROD1 DAPI**

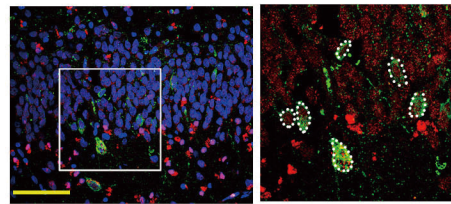

**Fig. S9 Adult neurogenesis persists in aged humans, related to Fig. 5**

**a, b** SOX2 and ETNPPL colocalized in the DG of the hippocampi of aged humans.

**c-e** The expression of DCX in the hippocampal DG of 52-year-old (**c**), 67-year-old (**d**), and 78-year-old humans (**e**).

**f** Quantification of DCX<sup>+</sup> cells in the DG of hippocampi in the donors shows remarkable individual variation.

**g, h** Neither STMN1 nor STMN2 colabeled with NEUROD1, a committed neurogenic progenitor marker.

Scale bar in white: 500 $\mu$ m, scale bar in yellow: 50 $\mu$ m.
