# Supplementary material
Source: PubMed Central journal article supplement (PMC9343414)
Supplement: 41422_2022_678_MOESM10_ESM.pdf [file 41422_2022_678_MOESM10_ESM.pdf]

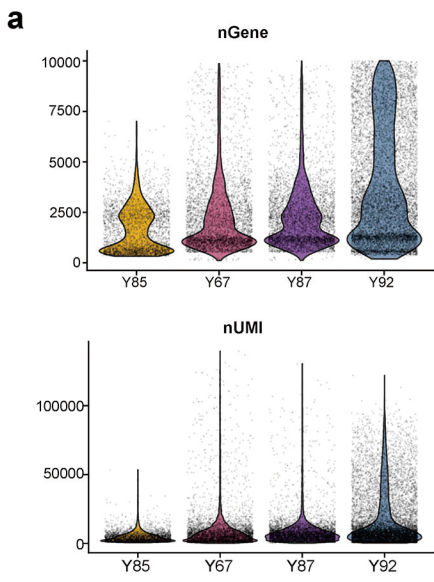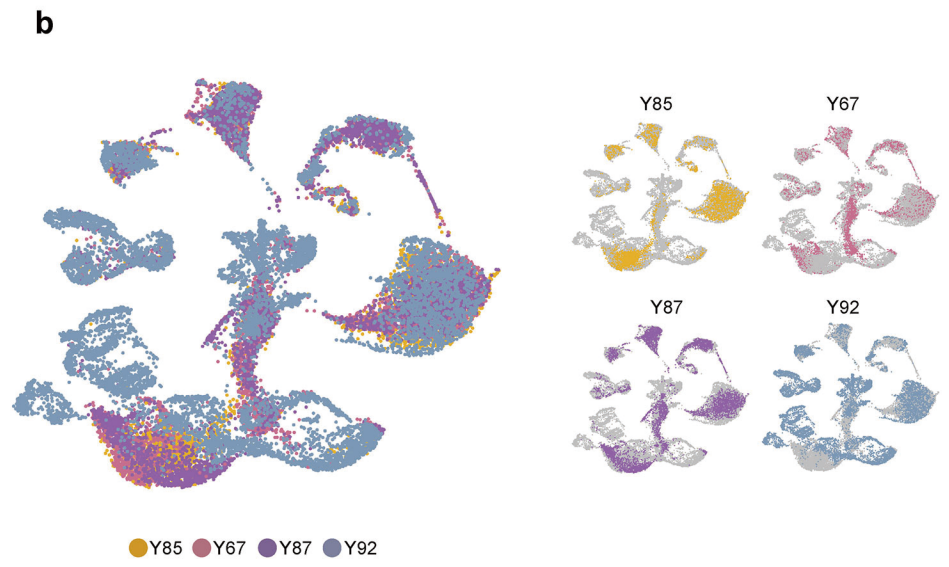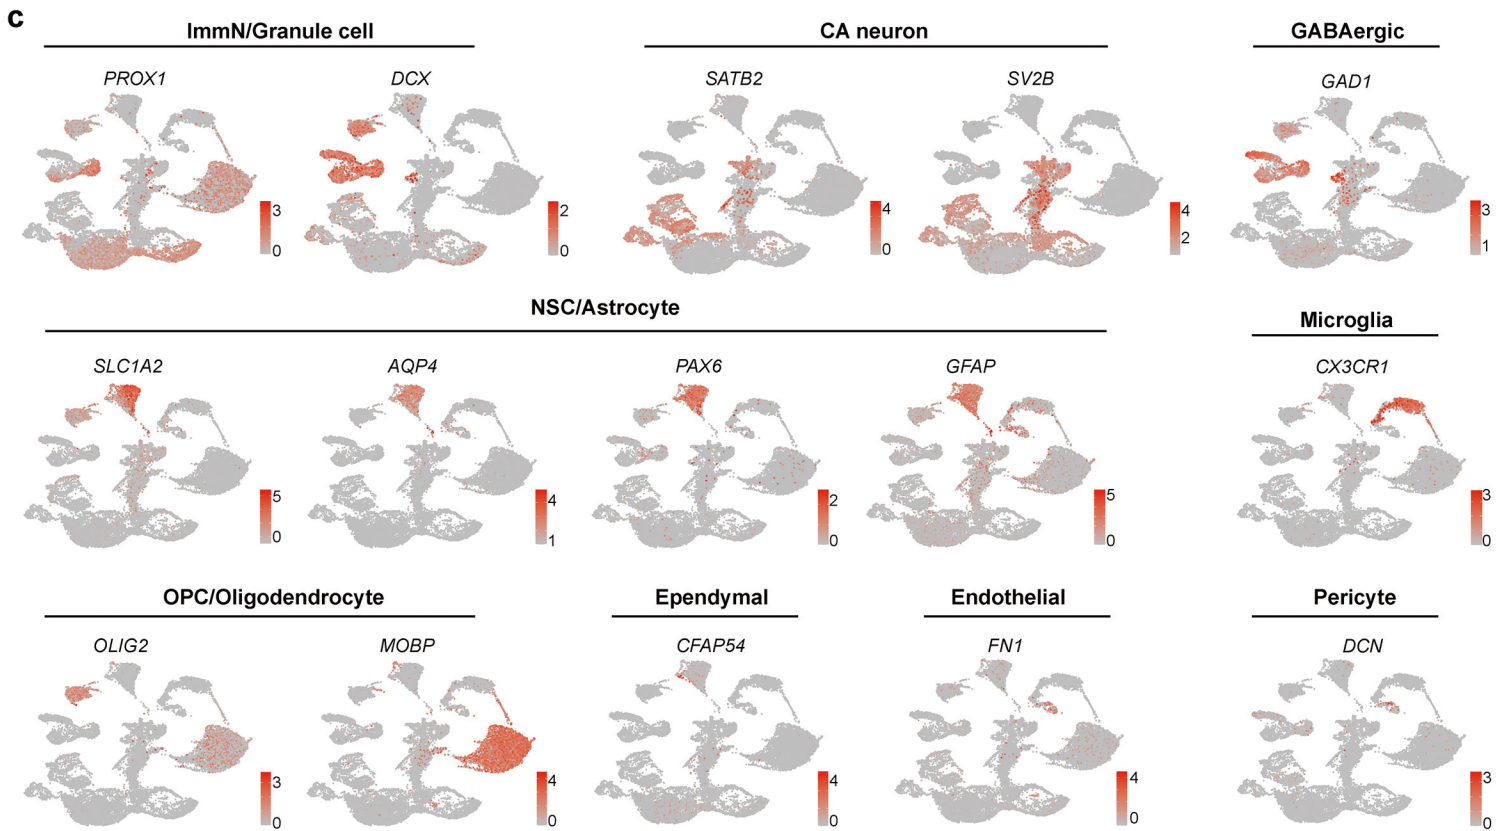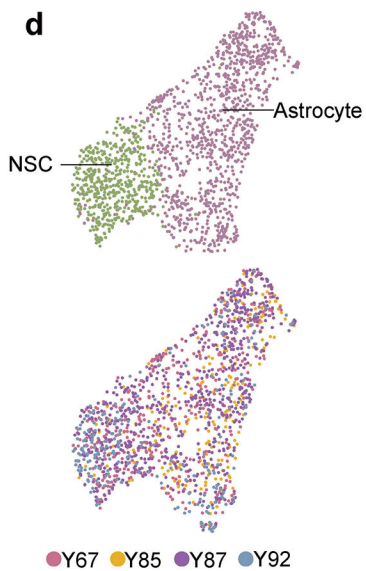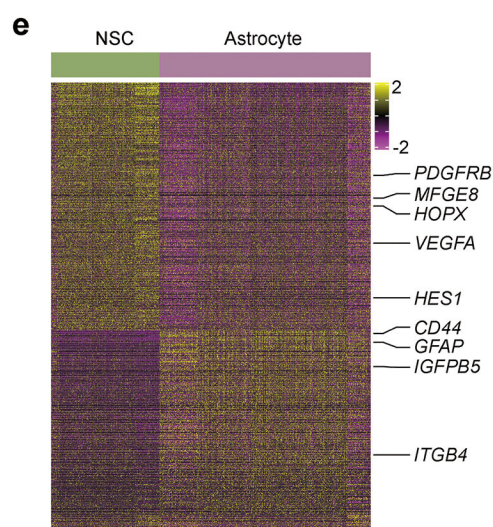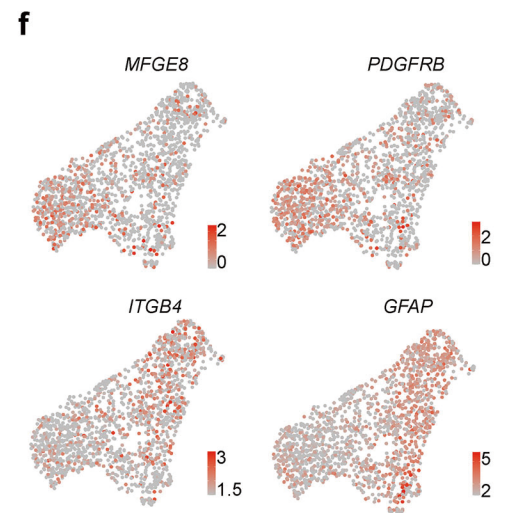

**Fig. S10 Transcriptional profiles of human hippocampi, related to Fig. 6**

**a** Quality control metrics were the number of genes (nGene) and number of unique molecular identifiers (nUMI) for human hippocampal samples; each dot represents a single cell.

**b** UMAP showing the distribution of four obtained human hippocampal samples.

**c** UMAP showing the expression of known marker genes for the identified major cell types.

**d** UMAP showing the clustering of human NSCs and astrocytes (upper panel) and the distribution of samples (lower panel).

**e** Heatmap illustrating the differentially expressed genes between human NSCs and astrocytes.

**f** UMAP showing the expression of NSC (*MFGE8* and *PDGFRB*) and astrocyte (*ITGB4* and *GFAP*) enriched genes.
