# Supplementary material
Source: PubMed Central journal article supplement (PMC9343414)
Supplement: 41422_2022_678_MOESM11_ESM.pdf [file 41422_2022_678_MOESM11_ESM.pdf]

**a**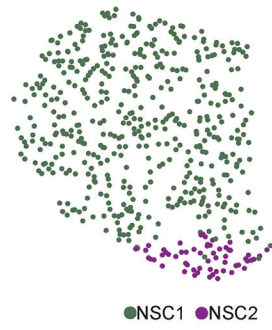**b**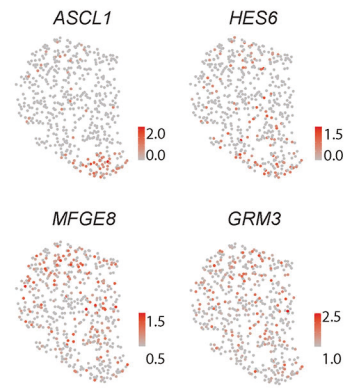**c**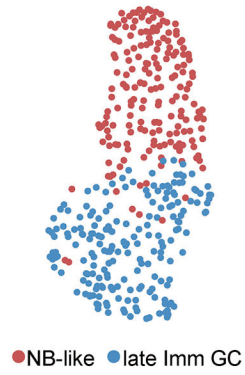**d**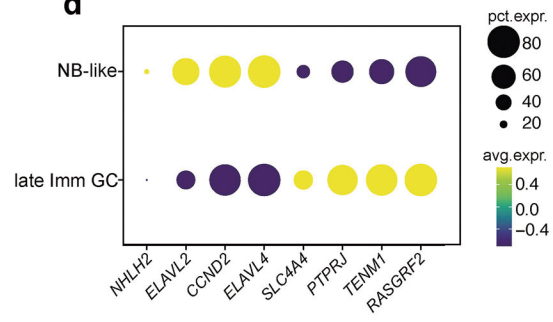

**Fig. S11 Distinct properties of Human NSCs and Immatur granule cells, related to Fig. 6**

**a** The UMAP of clustering of NSCs from human.

**b** Feature plot showing the representative expression of genes enriched in active and quiescent subclusters.

**c** The UMAP of subclustering of human ImmN cluster.

**d** Representative genes expressed in human NB-like and Late-ImmGC clusters.
