# Supplementary material
Source: PubMed Central journal article supplement (PMC9343414)
Supplement: 41422_2022_678_MOESM12_ESM.pdf [file 41422_2022_678_MOESM12_ESM.pdf]

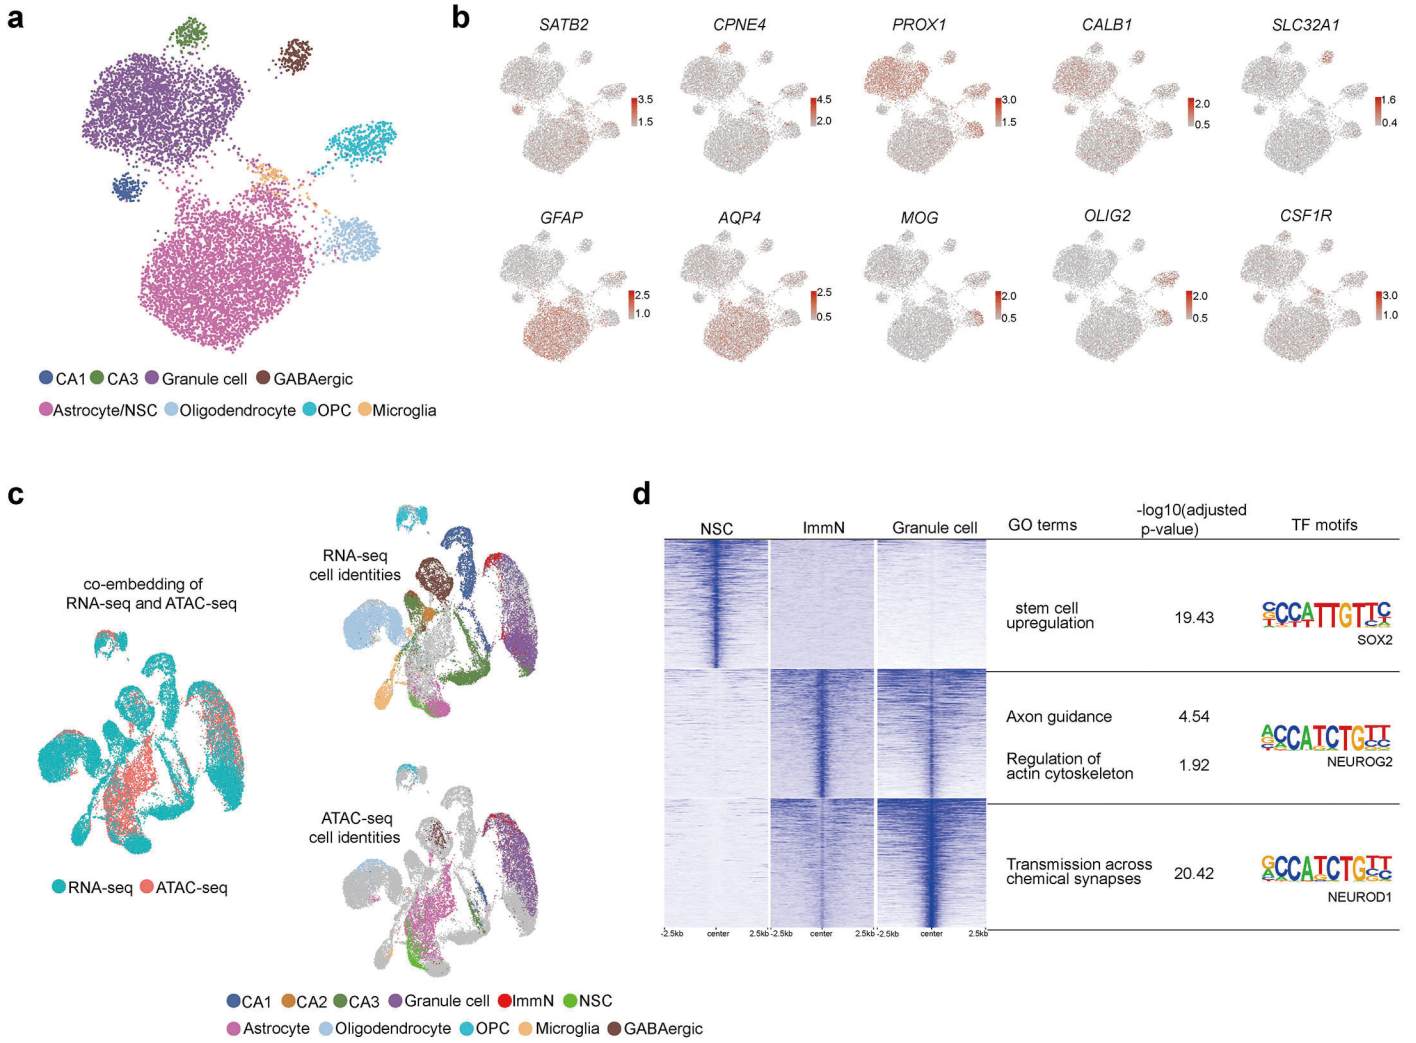

**Fig. S12 Single-cell chromatin accessibility of the adult human dentate gyrus, related to Fig. 6**

**a** UMAP plot of snATAC-seq cells of aged hippocampi in humans.

**b** UMAP showing the gene activity score of representative marker genes for the 8 major cell types identified in the ATAC-seq data.

**c** Coembedding of the integrated RNA-seq and ATAC-seq datasets.

**d** Left, Pile-ups of ATAC-seq signal of the top 1000 cell type specific peaks, pile-ups are centered on peak centers and the +/-2.5Kb flanking region is depicted; Middle, Significantly enriched Gene ontology terms for each cluster; Right, Significantly enriched transcription factor motifs for each cluster-specific peak set.
