# Supplementary material
Source: PubMed Central journal article supplement (PMC9343414)
Supplement: 41422_2022_678_MOESM13_ESM.pdf [file 41422_2022_678_MOESM13_ESM.pdf]

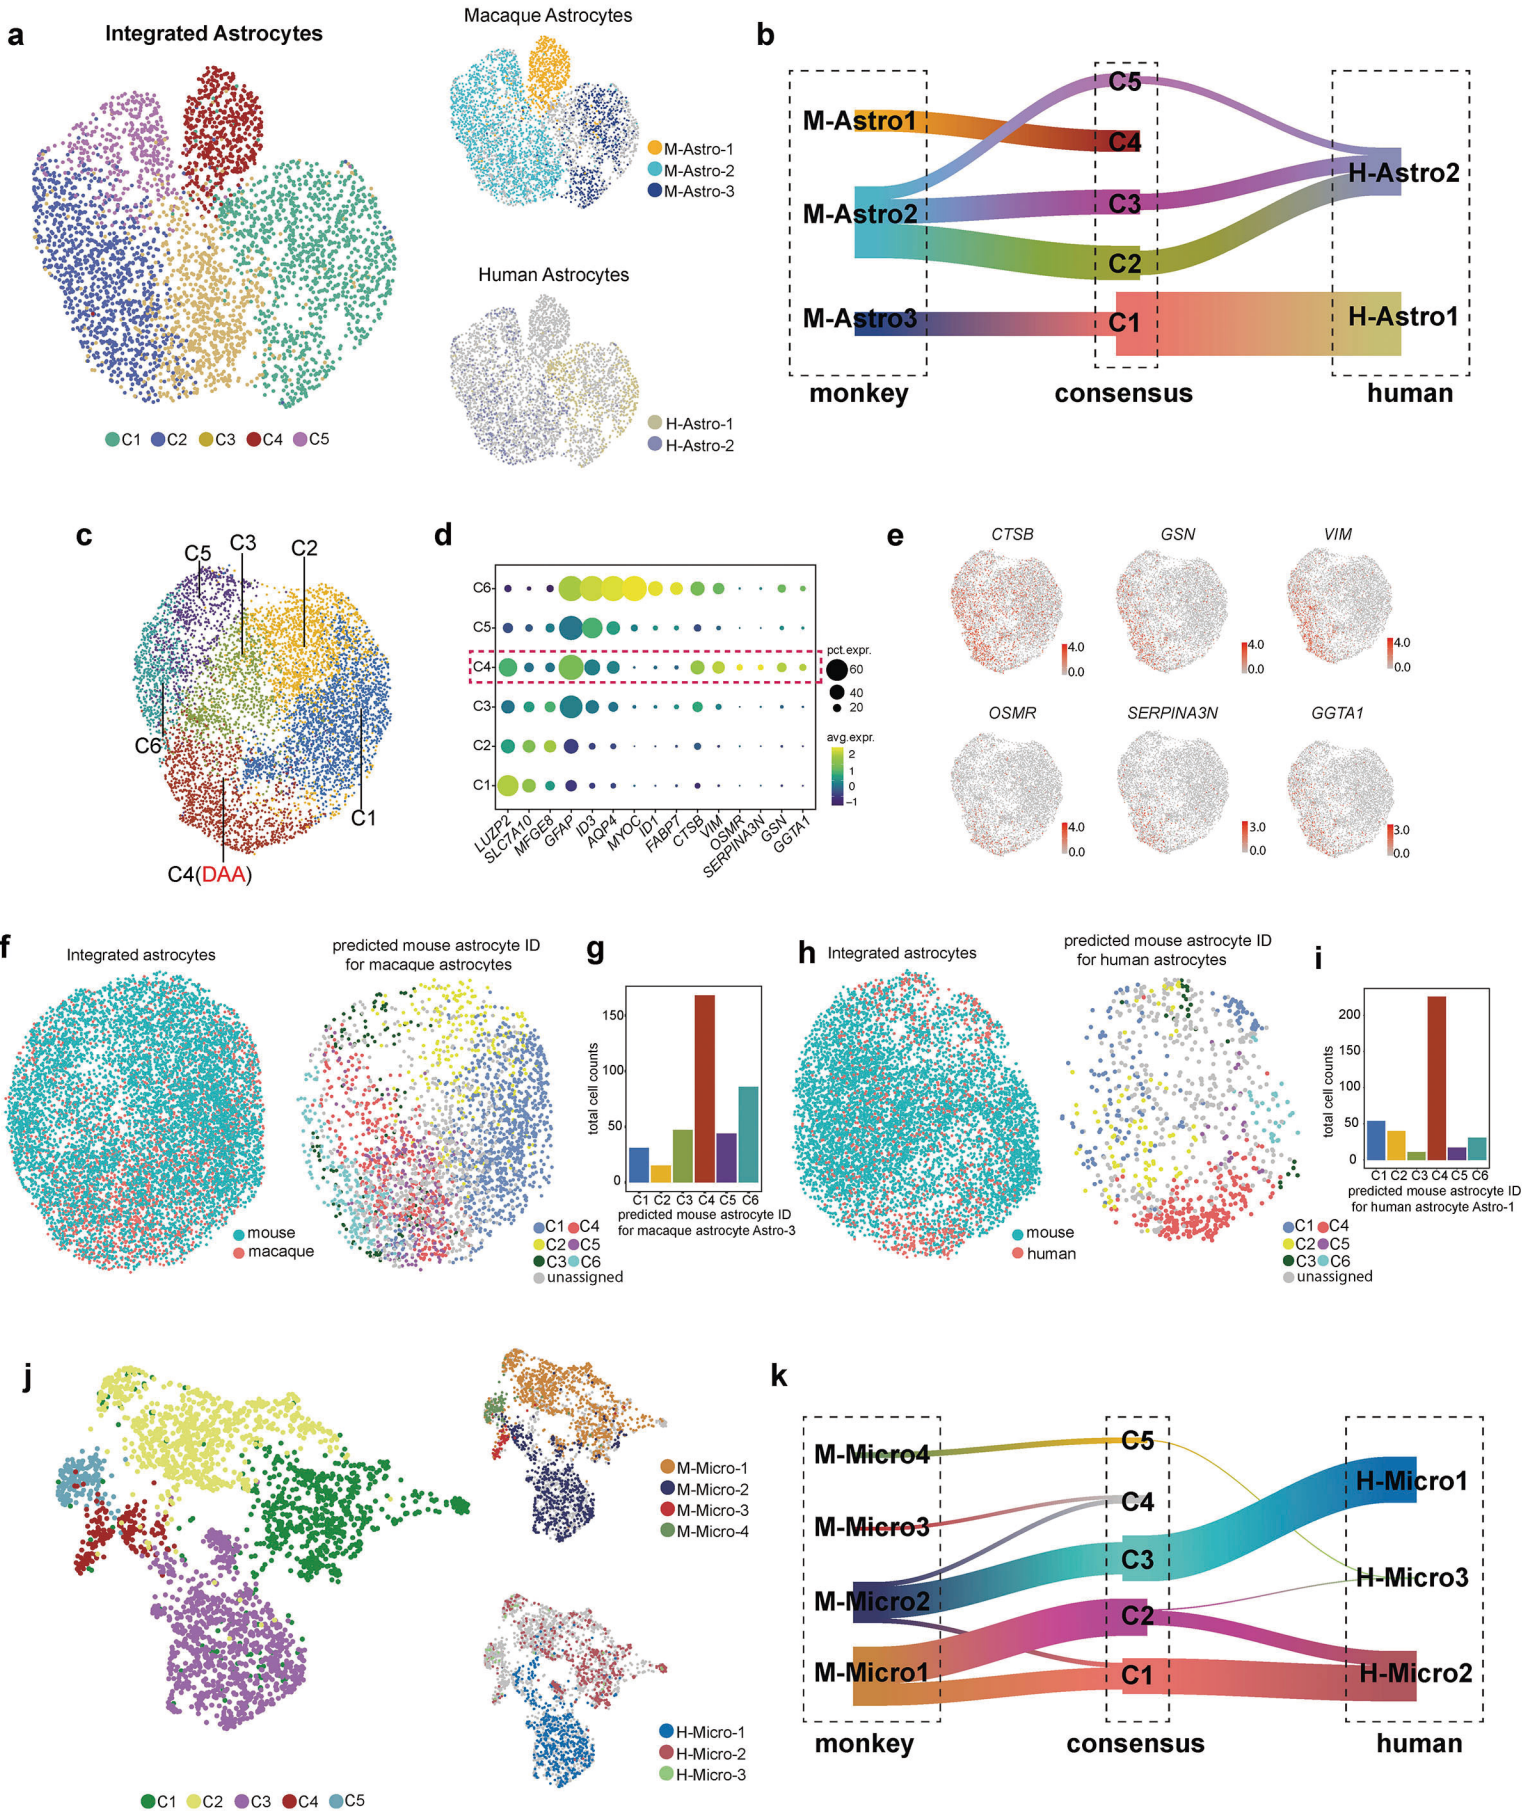

**Fig. S13 Gene expression profiles along the human neurogenic trajectory, related to Fig. 6**

- a** The integration of macaques and human astrocytes was visualized using UMAP.
- b** River plot illustrating the correspondence between macaque and human astrocyte subtypes.
- c** UMAP showing the astrocyte subtypes from Habib et al.
- d** Dotplot showing the expressing of genes that highly expressed in distinct astrocyte states.
- e** Featureplot showing the expression of the representative genes.
- f** UMAP showing the integration of astrocytes from macaque and those from Habib et al.
- g** Bar Plot showing the number of cells from macaque astrocyte subtype M-Astro3 that mapped onto DAA from Habib et al.
- h** UMAP showing the integration of astrocytes from human and those from Habib et al.
- i** Bar Plot showing the number of cells from human astrocyte subtype H-Astro1 that mapped onto DAA from Habib et al.
- j** The integration of macaques and human microglia is visualized using UMAP.
- k** River plot illustrating the correspondence between macaque and human microglial subtypes.
