# Supplementary material
Source: PubMed Central journal article supplement (PMC9343414)
Supplement: 41422_2022_678_MOESM14_ESM.pdf [file 41422_2022_678_MOESM14_ESM.pdf]

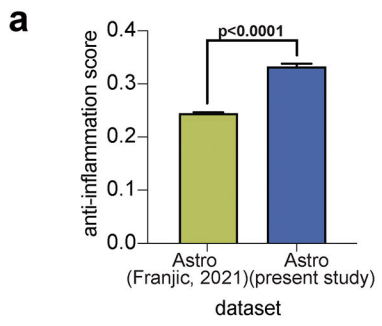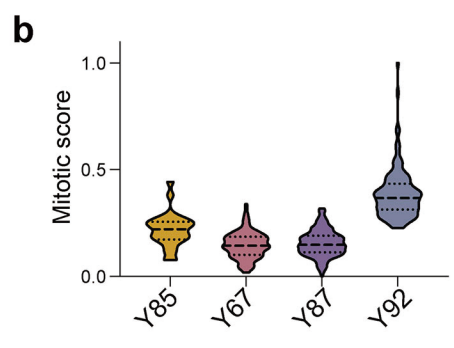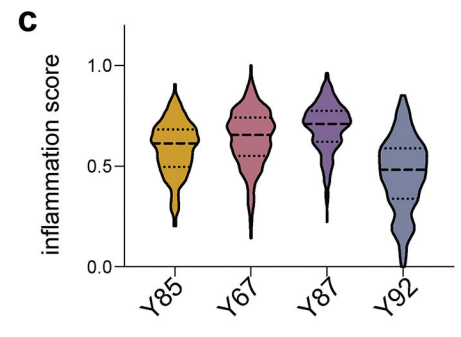

**Fig. S14 Astrocyte inflammation negatively regulates adult hippocampal neurogenesis in humans, related to Fig.6**

**a** Anti-inflammation score analysis in the astrocytes from current dataset and Franjic's dataset.

**b** Violin plot showing the distribution of mitotic score of human ImmN from each sample.

**c** Violin plot showing the distribution of inflammation score of human ImmN from each sample.
