# Supplementary material
Source: PubMed Central journal article supplement (PMC9343414)
Supplement: 41422_2022_678_MOESM15_ESM.pdf [file 41422_2022_678_MOESM15_ESM.pdf]

**Supplementary information****TableS1. Summary of sample information for macaques**

| <b>Animal No.</b> | <b>Age</b> | <b>Sex</b> | <b>Experimental Use</b> |
|-------------------|------------|------------|-------------------------|
| 1                 | P0         | male       | snRNA-seq               |
| 2                 | 0.5 years  | male       | snRNA-seq               |
| 3                 | 1 years    | male       | snRNA-seq               |
| 4                 | 2 years    | male       | snRNA-seq               |
| 5                 | 4 years    | male       | snRNA-seq               |
| 6                 | 4 years    | male       | snRNA-seq, BrdU, EdU    |
| 7                 | 4 years    | male       | snRNA-seq, BrdU, EdU    |
| 8                 | 10 years   | male       | snRNA-seq, BrdU, EdU    |
| 9                 | 11 years   | male       | snRNA-seq               |
| 10                | 11 years   | female     | snRNA-seq               |
| 11                | 15 years   | male       | snRNA-seq               |
| 12                | 22 years   | female     | snRNA-seq               |
| 13                | 23 years   | male       | snRNA-seq, BrdU, EdU    |
