# Supplementary material
Source: PubMed Central journal article supplement (PMC9343414)
Supplement: 41422_2022_678_MOESM16_ESM.pdf [file 41422_2022_678_MOESM16_ESM.pdf]

**Supplementary information****TableS2. Differentially expressed genes among major cell type of macaque hippocampus**

| p_val | avg_log2FC | pct.1 | pct.2 | p_val_adj | cluster | gene     |
|-------|------------|-------|-------|-----------|---------|----------|
| 0     | 1.70999213 | 0.948 | 0.414 | 0         | CA1     | HECW1    |
| 0     | 1.61529988 | 0.974 | 0.5   | 0         | CA1     | LDB2     |
| 0     | 1.57444202 | 0.993 | 0.874 | 0         | CA1     | PHACTR1  |
| 0     | 1.56579405 | 0.811 | 0.148 | 0         | CA1     | SATB2    |
| 0     | 1.54888697 | 0.943 | 0.481 | 0         | CA1     | PRKCB    |
| 0     | 1.52477163 | 0.445 | 0.103 | 0         | CA1     | POU6F2   |
| 0     | 1.51974967 | 0.565 | 0.169 | 0         | CA1     | FSTL4    |
| 0     | 1.48873407 | 0.937 | 0.598 | 0         | CA1     | RYR3     |
| 0     | 1.44232636 | 0.99  | 0.859 | 0         | CA1     | KCNIP4   |
| 0     | 1.42668767 | 0.733 | 0.285 | 0         | CA1     | TMEM132D |
| 0     | 1.41445514 | 0.811 | 0.385 | 0         | CA1     | CADPS2   |
| 0     | 1.40579874 | 0.836 | 0.287 | 0         | CA1     | SYN3     |
| 0     | 1.39489218 | 0.71  | 0.249 | 0         | CA1     | KCNH7    |
| 0     | 1.3258871  | 0.831 | 0.315 | 0         | CA1     | CNTN3    |
| 0     | 1.29354527 | 0.986 | 0.703 | 0         | CA1     | SLC8A1   |
| 0     | 1.23436944 | 0.558 | 0.171 | 0         | CA1     | SNTG2    |
| 0     | 1.23222953 | 0.739 | 0.229 | 0         | CA1     | MLIP     |
| 0     | 1.21323995 | 0.911 | 0.541 | 0         | CA1     | CNTNAP5  |
| 0     | 1.2105492  | 0.985 | 0.679 | 0         | CA1     | ASIC2    |
| 0     | 1.20477343 | 0.944 | 0.5   | 0         | CA1     | SLC35F3  |
| 0     | 1.18458616 | 0.988 | 0.691 | 0         | CA1     | ARPP21   |
| 0     | 1.17131502 | 0.914 | 0.462 | 0         | CA1     | SORBS2   |
| 0     | 1.16406892 | 0.587 | 0.293 | 0         | CA1     | CCBE1    |
| 0     | 1.1634118  | 0.932 | 0.687 | 0         | CA1     | ROBO2    |
| 0     | 1.16332604 | 0.562 | 0.224 | 0         | CA1     | TSHZ2    |
| 0     | 1.15835492 | 0.933 | 0.438 | 0         | CA1     | PTPRR    |
| 0     | 1.15389102 | 0.921 | 0.385 | 0         | CA1     | CDH18    |
| 0     | 1.13011872 | 0.997 | 0.867 | 0         | CA1     | OPCML    |
| 0     | 1.12720204 | 0.971 | 0.664 | 0         | CA1     | NRG1     |
| 0     | 1.12615297 | 0.88  | 0.264 | 0         | CA1     | SV2B     |
| 0     | 1.11088818 | 0.827 | 0.367 | 0         | CA1     | KCNN2    |
| 0     | 1.1030183  | 0.808 | 0.291 | 0         | CA1     | LMO4     |
| 0     | 1.09199297 | 0.599 | 0.195 | 0         | CA1     | EPHA3    |
| 0     | 1.08798339 | 0.961 | 0.618 | 0         | CA1     | ATP2B1   |
| 0     | 1.08659489 | 0.783 | 0.339 | 0         | CA1     | SORCS3   |
| 0     | 1.08620618 | 0.943 | 0.476 | 0         | CA1     | SH3GL2   |
| 0     | 1.08342134 | 0.915 | 0.459 | 0         | CA1     | THRB     |
| 0     | 1.08017035 | 0.858 | 0.356 | 0         | CA1     | OLFM3    |

|   |            |       |       |   |     |          |
|---|------------|-------|-------|---|-----|----------|
| 0 | 1.07359497 | 0.97  | 0.593 | 0 | CA1 | TMEM178B |
| 0 | 1.06614556 | 0.712 | 0.365 | 0 | CA1 | RGS6     |
| 0 | 1.06361457 | 0.929 | 0.396 | 0 | CA1 | MTUS2    |
| 0 | 1.05514788 | 0.85  | 0.389 | 0 | CA1 | EFNA5    |
| 0 | 1.05273456 | 0.72  | 0.168 | 0 | CA1 | PAPSS2   |
| 0 | 1.04824465 | 0.909 | 0.446 | 0 | CA1 | HOMER1   |
| 0 | 1.04820546 | 0.492 | 0.401 | 0 | CA1 | CELF2    |
| 0 | 1.04469444 | 0.992 | 0.866 | 0 | CA1 | MAPK10   |
| 0 | 1.0436763  | 0.957 | 0.581 | 0 | CA1 | DOK6     |
| 0 | 1.03313805 | 0.966 | 0.531 | 0 | CA1 | PCSK2    |
| 0 | 1.03256326 | 0.503 | 0.223 | 0 | CA1 | IL1RAPL2 |
| 0 | 1.02692541 | 0.93  | 0.583 | 0 | CA1 | EPHA5    |
| 0 | 1.02583212 | 0.437 | 0.154 | 0 | CA1 | RXFP1    |
| 0 | 1.02096499 | 0.992 | 0.698 | 0 | CA1 | AGBL4    |
| 0 | 1.01813775 | 0.947 | 0.621 | 0 | CA1 | PDE1A    |
| 0 | 1.01041741 | 0.896 | 0.338 | 0 | CA1 | PDE2A    |
| 0 | 1.00590428 | 0.906 | 0.41  | 0 | CA1 | CACNG3   |
| 0 | 1.00550032 | 0.481 | 0.118 | 0 | CA1 | AGBL1    |
| 0 | 1.00409611 | 0.821 | 0.331 | 0 | CA1 | ANKRD33B |
| 0 | 1.00388406 | 0.343 | 0.202 | 0 | CA1 | CNN3     |
| 0 | 1.00147176 | 0.658 | 0.358 | 0 | CA1 | LRFN5    |
| 0 | 0.99140102 | 0.974 | 0.731 | 0 | CA1 | RIMS2    |
| 0 | 0.98866214 | 0.97  | 0.676 | 0 | CA1 | R3HDM1   |
| 0 | 0.97774179 | 0.679 | 0.279 | 0 | CA1 | KIAA1217 |
| 0 | 0.96413292 | 0.947 | 0.536 | 0 | CA1 | PRICKLE2 |
| 0 | 0.95879601 | 0.866 | 0.355 | 0 | CA1 | SNCA     |
| 0 | 0.95767276 | 0.989 | 0.777 | 0 | CA1 | LARGE1   |
| 0 | 0.94302863 | 0.655 | 0.321 | 0 | CA1 | RBFOX3   |
| 0 | 0.94297999 | 0.902 | 0.709 | 0 | CA1 | KCNQ5    |
| 0 | 0.92976565 | 0.94  | 0.54  | 0 | CA1 | KSR2     |
| 0 | 0.92735878 | 0.775 | 0.38  | 0 | CA1 | MAN1A1   |
| 0 | 0.92731748 | 0.968 | 0.524 | 0 | CA1 | SHANK2   |
| 0 | 0.92251423 | 0.933 | 0.537 | 0 | CA1 | PRKAG2   |
| 0 | 0.92101037 | 0.995 | 0.783 | 0 | CA1 | KALRN    |
| 0 | 0.91965485 | 0.973 | 0.653 | 0 | CA1 | GRIA3    |
| 0 | 0.91764977 | 0.718 | 0.159 | 0 | CA1 | IGSF21   |
| 0 | 0.91742033 | 0.953 | 0.51  | 0 | CA1 | HSPA12A  |
| 0 | 0.91658611 | 0.73  | 0.235 | 0 | CA1 | NGEF     |
| 0 | 0.91578681 | 0.913 | 0.429 | 0 | CA1 | ACTN1    |
| 0 | 0.91537726 | 0.847 | 0.369 | 0 | CA1 | NPAS2    |
| 0 | 0.91506242 | 0.998 | 0.879 | 0 | CA1 | SYT1     |

|   |            |       |       |   |     |         |
|---|------------|-------|-------|---|-----|---------|
| 0 | 0.91127397 | 0.973 | 0.789 | 0 | CA1 | DPP10   |
| 0 | 0.90492085 | 0.993 | 0.828 | 0 | CA1 | DMD     |
| 0 | 0.90067951 | 0.938 | 0.556 | 0 | CA1 | RUNX1T1 |
| 0 | 0.89477168 | 0.708 | 0.438 | 0 | CA1 | MYO16   |
| 0 | 0.89400751 | 0.972 | 0.707 | 0 | CA1 | GRM7    |
| 0 | 0.88824308 | 0.944 | 0.593 | 0 | CA1 | ATRN1   |
| 0 | 0.88299981 | 0.259 | 0.119 | 0 | CA1 | RORB    |
| 0 | 0.88231546 | 0.572 | 0.215 | 0 | CA1 | TRPC4   |
| 0 | 0.87614645 | 0.999 | 0.939 | 0 | CA1 | ADGRB3  |
| 0 | 0.87066393 | 0.531 | 0.148 | 0 | CA1 | KLHL1   |
| 0 | 0.86874939 | 0.465 | 0.198 | 0 | CA1 | MICAL2  |
| 0 | 0.86146452 | 0.608 | 0.17  | 0 | CA1 | IQCJ    |
| 0 | 0.86096089 | 0.771 | 0.377 | 0 | CA1 | NDST3   |
| 0 | 0.86060402 | 0.952 | 0.564 | 0 | CA1 | KHDRBS3 |
| 0 | 0.85857655 | 0.994 | 0.848 | 0 | CA1 | NEGR1   |
| 0 | 0.85488243 | 0.829 | 0.361 | 0 | CA1 | VSNL1   |
| 0 | 0.85228793 | 0.974 | 0.592 | 0 | CA1 | KCNMA1  |
| 0 | 0.84906421 | 0.905 | 0.491 | 0 | CA1 | CDH12   |
| 0 | 0.84825369 | 0.673 | 0.202 | 0 | CA1 | ST8SIA5 |
| 0 | 0.84493395 | 0.928 | 0.49  | 0 | CA1 | CAMK4   |
| 0 | 0.83320343 | 0.718 | 0.305 | 0 | CA1 | NWD2    |
| 0 | 0.83160316 | 0.958 | 0.601 | 0 | CA1 | AK5     |
| 0 | 0.82798537 | 0.355 | 0.081 | 0 | CA1 | RGS4    |
| 0 | 0.8263722  | 0.949 | 0.482 | 0 | CA1 | GRIN1   |
| 0 | 0.82137936 | 0.968 | 0.523 | 0 | CA1 | SPTBN4  |
| 0 | 0.82039669 | 0.969 | 0.824 | 0 | CA1 | PEX5L   |
| 0 | 0.81947579 | 0.692 | 0.306 | 0 | CA1 | SORCS1  |
| 0 | 0.81791566 | 0.995 | 0.785 | 0 | CA1 | TENM2   |
| 0 | 0.8149     | 0.75  | 0.217 | 0 | CA1 | SLC6A7  |
| 0 | 0.81472038 | 0.908 | 0.401 | 0 | CA1 | CHD5    |
| 0 | 0.81470352 | 0.967 | 0.595 | 0 | CA1 | CHSY3   |
| 0 | 0.81410111 | 0.955 | 0.563 | 0 | CA1 | PCNX2   |
| 0 | 0.81244281 | 0.82  | 0.337 | 0 | CA1 | RAP1GAP |
| 0 | 0.80915561 | 0.968 | 0.556 | 0 | CA1 | CAMK2A  |
| 0 | 0.8045277  | 0.98  | 0.753 | 0 | CA1 | LRRTM4  |
| 0 | 0.80448051 | 0.815 | 0.358 | 0 | CA1 | ANO3    |
| 0 | 0.80419128 | 0.981 | 0.709 | 0 | CA1 | SNAP25  |
| 0 | 0.80075963 | 0.994 | 0.849 | 0 | CA1 | CCSER1  |
| 0 | 0.79418512 | 0.999 | 0.913 | 0 | CA1 | RBFOX1  |
| 0 | 0.7939596  | 0.867 | 0.379 | 0 | CA1 | SRRM4   |
| 0 | 0.78885884 | 0.875 | 0.504 | 0 | CA1 | ADCY2   |

|           |            |       |       |           |     |          |
|-----------|------------|-------|-------|-----------|-----|----------|
| 0         | 0.78714015 | 0.976 | 0.676 | 0         | CA1 | ARHGAP26 |
| 0         | 0.78692871 | 0.887 | 0.419 | 0         | CA1 | ITPR1    |
| 0         | 0.78478975 | 0.611 | 0.19  | 0         | CA1 | ARHGAP10 |
| 0         | 0.78246231 | 0.971 | 0.646 | 0         | CA1 | DGKI     |
| 0         | 0.77849464 | 0.994 | 0.822 | 0         | CA1 | PDE4D    |
| 0         | 0.77455967 | 0.986 | 0.726 | 0         | CA1 | NELL2    |
| 0         | 0.76899807 | 0.989 | 0.709 | 0         | CA1 | DCLK1    |
| 0         | 0.76804938 | 0.972 | 0.549 | 0         | CA1 | CACNA1B  |
| 0         | 0.76636299 | 0.775 | 0.261 | 0         | CA1 | GAP43    |
| 0         | 0.76404779 | 0.997 | 0.83  | 0         | CA1 | STXBP5L  |
| 0         | 0.75959795 | 0.516 | 0.12  | 0         | CA1 | IL12RB2  |
| 0         | 0.75922704 | 0.962 | 0.634 | 0         | CA1 | FOCAD    |
| 0         | 0.75892082 | 0.773 | 0.319 | 0         | CA1 | ADAM11   |
| 0         | 0.7549167  | 0.862 | 0.458 | 0         | CA1 | NYAP2    |
| 0         | 0.7488669  | 0.959 | 0.638 | 0         | CA1 | FBXW7    |
| 0         | 0.74750377 | 0.66  | 0.213 | 0         | CA1 | RFTN1    |
| 0         | 0.74744438 | 0.732 | 0.275 | 0         | CA1 | RTN4RL1  |
| 0         | 0.74552685 | 0.782 | 0.371 | 0         | CA1 | OLFM1    |
| 0         | 0.74527988 | 0.683 | 0.238 | 0         | CA1 | RASGRP1  |
| 0         | 0.743558   | 0.433 | 0.142 | 0         | CA1 | SLC12A3  |
| 0         | 0.74249735 | 0.966 | 0.58  | 0         | CA1 | SYBU     |
| 0         | 0.73906604 | 0.963 | 0.573 | 0         | CA1 | SCN8A    |
| 0         | 0.73887178 | 0.992 | 0.781 | 0         | CA1 | GRM5     |
| 0         | 0.7369603  | 0.832 | 0.315 | 0         | CA1 | SYT7     |
| 0         | 0.73593786 | 0.905 | 0.503 | 0         | CA1 | EPHA4    |
| 0         | 0.73528585 | 0.817 | 0.394 | 0         | CA1 | PDE10A   |
| 0         | 0.73439834 | 0.703 | 0.204 | 0         | CA1 | STUM     |
| 0         | 0.73290781 | 0.995 | 0.772 | 0         | CA1 | LRRC7    |
| 0         | 0.73217116 | 0.782 | 0.309 | 0         | CA1 | ELAVL4   |
| 0         | 0.72398754 | 0.6   | 0.108 | 0         | CA1 | MPPED1   |
| 2.32E-268 | 0.87959837 | 0.456 | 0.271 | 3.17E-264 | CA2 | TENM4    |
| 7.13E-271 | 0.46129705 | 0.297 | 0.124 | 9.75E-267 | CA2 | RGS4     |
| 9.27E-308 | 0.98102976 | 0.896 | 0.652 | 1.27E-303 | CA2 | CALM1    |
| 0         | 3.55224549 | 0.999 | 0.259 | 0         | CA2 | TSHZ2    |
| 0         | 2.76866811 | 0.997 | 0.332 | 0         | CA2 | PTPRT    |
| 0         | 2.72968019 | 0.565 | 0.062 | 0         | CA2 | HTR1F    |
| 0         | 2.4392433  | 0.986 | 0.271 | 0         | CA2 | TOX      |
| 0         | 2.30391355 | 0.979 | 0.2   | 0         | CA2 | VWC2L    |
| 0         | 2.21946386 | 0.998 | 0.441 | 0         | CA2 | GPC6     |
| 0         | 2.1291254  | 0.971 | 0.242 | 0         | CA2 | EPHA3    |
| 0         | 2.11974108 | 0.976 | 0.309 | 0         | CA2 | KCNH5    |

|   |            |       |       |   |     |          |
|---|------------|-------|-------|---|-----|----------|
| 0 | 2.1003067  | 0.994 | 0.427 | 0 | CA2 | OLFM3    |
| 0 | 2.05507022 | 0.979 | 0.242 | 0 | CA2 | SATB2    |
| 0 | 2.04558355 | 0.992 | 0.406 | 0 | CA2 | PDZRN4   |
| 0 | 1.93876878 | 0.998 | 0.583 | 0 | CA2 | KCNB2    |
| 0 | 1.83182509 | 0.95  | 0.441 | 0 | CA2 | NCALD    |
| 0 | 1.81681811 | 0.996 | 0.614 | 0 | CA2 | TRPM3    |
| 0 | 1.71870214 | 0.987 | 0.548 | 0 | CA2 | PRR16    |
| 0 | 1.70800999 | 0.937 | 0.27  | 0 | CA2 | PDZRN3   |
| 0 | 1.67748001 | 0.94  | 0.325 | 0 | CA2 | ADGRL2   |
| 0 | 1.65927574 | 0.825 | 0.266 | 0 | CA2 | SEMA6D   |
| 0 | 1.63985812 | 0.996 | 0.551 | 0 | CA2 | CDH12    |
| 0 | 1.63140316 | 0.936 | 0.301 | 0 | CA2 | SGCD     |
| 0 | 1.59491925 | 0.81  | 0.121 | 0 | CA2 | ADAMTS16 |
| 0 | 1.59152387 | 0.687 | 0.173 | 0 | CA2 | PCP4     |
| 0 | 1.56019252 | 0.997 | 0.571 | 0 | CA2 | LDB2     |
| 0 | 1.54608209 | 0.999 | 0.736 | 0 | CA2 | ARPP21   |
| 0 | 1.54423008 | 0.835 | 0.209 | 0 | CA2 | TSHZ3    |
| 0 | 1.52742217 | 0.993 | 0.567 | 0 | CA2 | MEF2C    |
| 0 | 1.51594167 | 0.938 | 0.215 | 0 | CA2 | FSTL4    |
| 0 | 1.51116694 | 0.963 | 0.454 | 0 | CA2 | EFNA5    |
| 0 | 1.48764711 | 0.996 | 0.621 | 0 | CA2 | KHDRBS3  |
| 0 | 1.44812345 | 0.92  | 0.36  | 0 | CA2 | NWD2     |
| 0 | 1.41762398 | 0.987 | 0.493 | 0 | CA2 | HECW1    |
| 0 | 1.41754017 | 0.687 | 0.027 | 0 | CA2 | ABCA12   |
| 0 | 1.40273239 | 0.916 | 0.178 | 0 | CA2 | RXFP1    |
| 0 | 1.38818527 | 0.61  | 0.206 | 0 | CA2 | CCK      |
| 0 | 1.37256743 | 0.998 | 0.605 | 0 | CA2 | SHISA9   |
| 0 | 1.3589305  | 0.996 | 0.596 | 0 | CA2 | PCSK2    |
| 0 | 1.35650479 | 0.703 | 0.37  | 0 | CA2 | RBFOX3   |
| 0 | 1.344546   | 1     | 0.878 | 0 | CA2 | KCNIP4   |
| 0 | 1.33969008 | 0.989 | 0.591 | 0 | CA2 | LDLRAD4  |
| 0 | 1.33814315 | 1     | 0.817 | 0 | CA2 | TENM2    |
| 0 | 1.33411718 | 0.517 | 0.209 | 0 | CA2 | NEFL     |
| 0 | 1.33240415 | 0.859 | 0.226 | 0 | CA2 | IQCJ     |
| 0 | 1.32527562 | 0.694 | 0.098 | 0 | CA2 | RSPO2    |
| 0 | 1.30114914 | 0.958 | 0.307 | 0 | CA2 | EPHB1    |
| 0 | 1.30010778 | 0.993 | 0.622 | 0 | CA2 | MYRIP    |
| 0 | 1.2862653  | 0.936 | 0.366 | 0 | CA2 | SYN3     |
| 0 | 1.28230498 | 0.996 | 0.749 | 0 | CA2 | SNAP25   |
| 0 | 1.25922175 | 0.999 | 0.746 | 0 | CA2 | GRM7     |
| 0 | 1.25307538 | 0.999 | 0.853 | 0 | CA2 | CTNNA2   |

|   |            |       |       |   |     |          |
|---|------------|-------|-------|---|-----|----------|
| 0 | 1.25234056 | 0.914 | 0.304 | 0 | CA2 | SEL1L3   |
| 0 | 1.24636389 | 0.81  | 0.217 | 0 | CA2 | CLMP     |
| 0 | 1.24387205 | 0.997 | 0.71  | 0 | CA2 | NRG1     |
| 0 | 1.21119925 | 0.986 | 0.612 | 0 | CA2 | RUNX1T1  |
| 0 | 1.21048773 | 0.9   | 0.429 | 0 | CA2 | VSNL1    |
| 0 | 1.20001489 | 0.943 | 0.409 | 0 | CA2 | RGS6     |
| 0 | 1.16808568 | 0.803 | 0.15  | 0 | CA2 | OSBPL3   |
| 0 | 1.1660086  | 0.77  | 0.136 | 0 | CA2 | FOXP2    |
| 0 | 1.14852215 | 0.806 | 0.194 | 0 | CA2 | SEC24D   |
| 0 | 1.14734296 | 0.998 | 0.742 | 0 | CA2 | AGBL4    |
| 0 | 1.14425446 | 0.843 | 0.367 | 0 | CA2 | RIT2     |
| 0 | 1.14295275 | 0.728 | 0.442 | 0 | CA2 | LRRC4C   |
| 0 | 1.12957319 | 0.795 | 0.335 | 0 | CA2 | PALLD    |
| 0 | 1.12929259 | 0.841 | 0.363 | 0 | CA2 | STMN2    |
| 0 | 1.12892403 | 0.974 | 0.567 | 0 | CA2 | SCAI     |
| 0 | 1.12757821 | 0.956 | 0.355 | 0 | CA2 | SORCS1   |
| 0 | 1.12621334 | 0.715 | 0.141 | 0 | CA2 | MYO5C    |
| 0 | 1.12312291 | 0.995 | 0.651 | 0 | CA2 | KCNH1    |
| 0 | 1.12123353 | 0.998 | 0.735 | 0 | CA2 | KCNQ5    |
| 0 | 1.11641904 | 0.726 | 0.149 | 0 | CA2 | GFRA2    |
| 0 | 1.11216131 | 0.924 | 0.4   | 0 | CA2 | ADAMTSL3 |
| 0 | 1.10298297 | 0.977 | 0.5   | 0 | CA2 | SLIT2    |
| 0 | 1.09741563 | 0.993 | 0.695 | 0 | CA2 | DGKI     |
| 0 | 1.09488806 | 0.991 | 0.686 | 0 | CA2 | SLC44A5  |
| 0 | 1.09413614 | 0.847 | 0.282 | 0 | CA2 | DOK5     |
| 0 | 1.08829798 | 0.634 | 0.13  | 0 | CA2 | TLL1     |
| 0 | 1.07247875 | 0.563 | 0.06  | 0 | CA2 | SLC38A11 |
| 0 | 1.05306809 | 0.999 | 0.813 | 0 | CA2 | GRM5     |
| 0 | 1.04746497 | 0.944 | 0.527 | 0 | CA2 | THRB     |
| 0 | 1.04627933 | 0.771 | 0.211 | 0 | CA2 | TSHZ1    |
| 0 | 1.0462605  | 0.974 | 0.448 | 0 | CA2 | ZMAT4    |
| 0 | 1.03895803 | 0.997 | 0.837 | 0 | CA2 | PBX1     |
| 0 | 1.03850756 | 0.755 | 0.175 | 0 | CA2 | CRTAC1   |
| 0 | 1.03465525 | 0.834 | 0.303 | 0 | CA2 | MLIP     |
| 0 | 1.0227989  | 0.731 | 0.201 | 0 | CA2 | OCA2     |
| 0 | 1.01350392 | 0.9   | 0.385 | 0 | CA2 | CIT      |
| 0 | 1.00881813 | 0.89  | 0.456 | 0 | CA2 | PDE10A   |
| 0 | 1.00337364 | 0.58  | 0.118 | 0 | CA2 | CUX2     |
| 0 | 0.99428383 | 0.99  | 0.646 | 0 | CA2 | UNC5D    |
| 0 | 0.99142206 | 0.864 | 0.451 | 0 | CA2 | GUCY1A2  |
| 0 | 0.98351023 | 0.762 | 0.216 | 0 | CA2 | ST6GAL1  |

|   |            |       |       |   |     |          |
|---|------------|-------|-------|---|-----|----------|
| 0 | 0.97914735 | 0.437 | 0.02  | 0 | CA2 | GLP2R    |
| 0 | 0.97333285 | 1     | 0.851 | 0 | CA2 | RGS7     |
| 0 | 0.97300981 | 0.999 | 0.892 | 0 | CA2 | PHACTR1  |
| 0 | 0.9644899  | 0.852 | 0.403 | 0 | CA2 | ACVR2A   |
| 0 | 0.96266019 | 0.98  | 0.617 | 0 | CA2 | GABRB2   |
| 0 | 0.96141073 | 0.844 | 0.337 | 0 | CA2 | GAP43    |
| 0 | 0.95063238 | 0.848 | 0.311 | 0 | CA2 | CNIH3    |
| 0 | 0.94162351 | 0.802 | 0.261 | 0 | CA2 | TRPC4    |
| 0 | 0.9371491  | 0.816 | 0.271 | 0 | CA2 | GRM8     |
| 0 | 0.93638908 | 0.822 | 0.38  | 0 | CA2 | GABRA1   |
| 0 | 0.91963039 | 0.989 | 0.68  | 0 | CA2 | XKR6     |
| 0 | 0.91736972 | 0.912 | 0.364 | 0 | CA2 | TRPC5    |
| 0 | 0.9040217  | 0.652 | 0.13  | 0 | CA2 | CAPS2    |
| 0 | 0.90045256 | 0.469 | 0.148 | 0 | CA2 | NEFM     |
| 0 | 0.90038832 | 0.987 | 0.535 | 0 | CA2 | CA10     |
| 0 | 0.89492789 | 0.846 | 0.335 | 0 | CA2 | SATB1    |
| 0 | 0.89457829 | 0.994 | 0.668 | 0 | CA2 | ATP8A2   |
| 0 | 0.89399407 | 0.971 | 0.613 | 0 | CA2 | AHI1     |
| 0 | 0.88865911 | 0.829 | 0.416 | 0 | CA2 | PKNOX2   |
| 0 | 0.88512048 | 0.938 | 0.477 | 0 | CA2 | PLXNA2   |
| 0 | 0.87819225 | 1     | 0.911 | 0 | CA2 | NKAIN2   |
| 0 | 0.87335586 | 0.649 | 0.156 | 0 | CA2 | SNCAIP   |
| 0 | 0.86473603 | 0.935 | 0.516 | 0 | CA2 | CDKL5    |
| 0 | 0.86430635 | 0.977 | 0.636 | 0 | CA2 | STXBP1   |
| 0 | 0.86352322 | 0.898 | 0.504 | 0 | CA2 | SSBP3    |
| 0 | 0.8561195  | 0.801 | 0.269 | 0 | CA2 | SLC8A3   |
| 0 | 0.85314653 | 0.585 | 0.083 | 0 | CA2 | GRM4     |
| 0 | 0.84685206 | 0.858 | 0.351 | 0 | CA2 | HIVEP1   |
| 0 | 0.84140681 | 0.9   | 0.46  | 0 | CA2 | REEP1    |
| 0 | 0.83908278 | 0.995 | 0.649 | 0 | CA2 | TMEM178B |
| 0 | 0.83725553 | 0.541 | 0.088 | 0 | CA2 | CCDC3    |
| 0 | 0.83350196 | 0.636 | 0.301 | 0 | CA2 | ZBTB18   |
| 0 | 0.82605456 | 0.975 | 0.602 | 0 | CA2 | CHL1     |
| 0 | 0.82504519 | 0.988 | 0.772 | 0 | CA2 | MAP1B    |
| 0 | 0.82416918 | 0.549 | 0.241 | 0 | CA2 | SYT4     |
| 0 | 0.81892505 | 0.978 | 0.59  | 0 | CA2 | SPTBN4   |
| 0 | 0.8153245  | 0.992 | 0.69  | 0 | CA2 | SYN2     |
| 0 | 0.81426106 | 0.738 | 0.245 | 0 | CA2 | MGAT5B   |
| 0 | 0.81419571 | 0.949 | 0.583 | 0 | CA2 | SPAG16   |
| 0 | 0.81169694 | 0.996 | 0.708 | 0 | CA2 | KCNQ3    |
| 0 | 0.81115977 | 0.577 | 0.136 | 0 | CA2 | COL26A1  |

|   |            |       |       |   |     |          |
|---|------------|-------|-------|---|-----|----------|
| 0 | 0.80987537 | 0.661 | 0.268 | 0 | CA2 | FAM3C    |
| 0 | 0.808895   | 0.571 | 0.15  | 0 | CA2 | ST6GAL2  |
| 0 | 0.80281384 | 0.96  | 0.48  | 0 | CA2 | FARP1    |
| 0 | 0.80248774 | 0.97  | 0.706 | 0 | CA2 | SDCCAG8  |
| 0 | 0.80218468 | 0.642 | 0.114 | 0 | CA2 | MYLK     |
| 0 | 0.79723662 | 0.956 | 0.576 | 0 | CA2 | ARMC9    |
| 0 | 0.79199205 | 0.898 | 0.422 | 0 | CA2 | PDE2A    |
| 0 | 0.79108403 | 0.678 | 0.211 | 0 | CA2 | HRH2     |
| 0 | 0.78885205 | 0.887 | 0.46  | 0 | CA2 | PAK1     |
| 0 | 0.78251783 | 0.97  | 0.615 | 0 | CA2 | PAK5     |
| 0 | 0.78240855 | 0.905 | 0.479 | 0 | CA2 | EPB41L3  |
| 0 | 0.78198687 | 0.428 | 0.208 | 0 | CA2 | LNK1     |
| 0 | 0.77174516 | 0.839 | 0.378 | 0 | CA2 | ELAVL4   |
| 0 | 0.7703322  | 0.82  | 0.399 | 0 | CA2 | PTPN5    |
| 0 | 0.76937917 | 0.999 | 0.814 | 0 | CA2 | FGF12    |
| 0 | 0.76897017 | 0.647 | 0.208 | 0 | CA2 | GALNT9   |
| 0 | 2.34829363 | 0.954 | 0.375 | 0 | CA3 | CPNE4    |
| 0 | 1.97017284 | 1     | 0.881 | 0 | CA3 | OPCML    |
| 0 | 1.82132565 | 0.908 | 0.251 | 0 | CA3 | B4GALNT3 |
| 0 | 1.72829461 | 0.837 | 0.571 | 0 | CA3 | TRPS1    |
| 0 | 1.70883474 | 0.977 | 0.633 | 0 | CA3 | RYR3     |
| 0 | 1.69850158 | 0.787 | 0.261 | 0 | CA3 | TRHDE    |
| 0 | 1.68391955 | 0.996 | 0.627 | 0 | CA3 | CLSTN2   |
| 0 | 1.66580973 | 0.946 | 0.562 | 0 | CA3 | NETO1    |
| 0 | 1.65465412 | 0.956 | 0.41  | 0 | CA3 | NRP1     |
| 0 | 1.64080767 | 0.892 | 0.323 | 0 | CA3 | AFF2     |
| 0 | 1.61709694 | 0.986 | 0.512 | 0 | CA3 | CELF4    |
| 0 | 1.60001757 | 0.984 | 0.764 | 0 | CA3 | ROBO1    |
| 0 | 1.57015132 | 0.993 | 0.685 | 0 | CA3 | PRKCE    |
| 0 | 1.55975087 | 0.941 | 0.736 | 0 | CA3 | EPHA6    |
| 0 | 1.533916   | 0.997 | 0.831 | 0 | CA3 | PTPRG    |
| 0 | 1.53383339 | 0.911 | 0.461 | 0 | CA3 | SLIT1    |
| 0 | 1.50177144 | 0.897 | 0.38  | 0 | CA3 | NECTIN3  |
| 0 | 1.47692806 | 0.995 | 0.713 | 0 | CA3 | ASIC2    |
| 0 | 1.43723722 | 0.966 | 0.712 | 0 | CA3 | ROBO2    |
| 0 | 1.41515438 | 0.887 | 0.532 | 0 | CA3 | KCNT2    |
| 0 | 1.3805783  | 0.99  | 0.605 | 0 | CA3 | KHDRBS3  |
| 0 | 1.33995057 | 0.961 | 0.474 | 0 | CA3 | AMPH     |
| 0 | 1.32544388 | 0.896 | 0.549 | 0 | CA3 | EPHA4    |
| 0 | 1.2901103  | 0.699 | 0.162 | 0 | CA3 | TSPAN18  |
| 0 | 1.27906841 | 0.999 | 0.848 | 0 | CA3 | CNTNAP2  |



|   |            |       |       |   |     |          |
|---|------------|-------|-------|---|-----|----------|
| 0 | 1.27675135 | 0.744 | 0.355 | 0 | CA3 | TEAD1    |
| 0 | 1.25160557 | 0.993 | 0.654 | 0 | CA3 | PDE1A    |
| 0 | 1.20447355 | 0.982 | 0.651 | 0 | CA3 | GALNT17  |
| 0 | 1.19807559 | 0.999 | 0.856 | 0 | CA3 | NRXN3    |
| 0 | 1.1923961  | 0.978 | 0.526 | 0 | CA3 | SH3GL2   |
| 0 | 1.18660295 | 0.998 | 0.77  | 0 | CA3 | GRIA1    |
| 0 | 1.16478842 | 0.972 | 0.69  | 0 | CA3 | CACNA2D3 |
| 0 | 1.14239996 | 0.54  | 0.407 | 0 | CA3 | CELF2    |
| 0 | 1.14146436 | 0.991 | 0.638 | 0 | CA3 | AK5      |
| 0 | 1.12931057 | 0.939 | 0.41  | 0 | CA3 | KCNN2    |
| 0 | 1.11297687 | 0.954 | 0.727 | 0 | CA3 | KCNQ5    |
| 0 | 1.10960409 | 0.965 | 0.596 | 0 | CA3 | SPOCK1   |
| 0 | 1.10581804 | 0.337 | 0.194 | 0 | CA3 | RXFP1    |
| 0 | 1.10565461 | 0.838 | 0.2   | 0 | CA3 | IQCJ     |
| 0 | 1.10507024 | 0.947 | 0.421 | 0 | CA3 | CADPS2   |
| 0 | 1.09171363 | 0.527 | 0.256 | 0 | CA3 | TENM4    |
| 0 | 1.07857941 | 0.941 | 0.421 | 0 | CA3 | FAM189A1 |
| 0 | 1.07368975 | 0.94  | 0.328 | 0 | CA3 | SV2B     |
| 0 | 1.0704508  | 0.989 | 0.577 | 0 | CA3 | PRKAG2   |
| 0 | 1.06895306 | 0.978 | 0.535 | 0 | CA3 | CAMK4    |
| 0 | 1.06309046 | 0.851 | 0.304 | 0 | CA3 | SMPD3    |
| 0 | 1.06039397 | 0.988 | 0.581 | 0 | CA3 | KSR2     |
| 0 | 1.0525726  | 0.997 | 0.734 | 0 | CA3 | SLC8A1   |
| 0 | 1.05194812 | 0.993 | 0.595 | 0 | CA3 | CACNA1B  |
| 0 | 1.05032266 | 0.998 | 0.841 | 0 | CA3 | PDE4D    |
| 0 | 1.04688176 | 0.983 | 0.58  | 0 | CA3 | PRICKLE2 |
| 0 | 1.04686108 | 0.898 | 0.375 | 0 | CA3 | RAP1GAP2 |
| 0 | 1.03899395 | 0.928 | 0.408 | 0 | CA3 | SNCA     |
| 0 | 1.03764101 | 0.988 | 0.679 | 0 | CA3 | CDK14    |
| 0 | 1.03564387 | 0.671 | 0.228 | 0 | CA3 | FREM1    |
| 0 | 1.0341848  | 0.918 | 0.704 | 0 | CA3 | PRKCA    |
| 0 | 1.02709253 | 0.962 | 0.469 | 0 | CA3 | DGKZ     |
| 0 | 1.02094383 | 0.86  | 0.292 | 0 | CA3 | NT5DC3   |
| 0 | 1.01208209 | 0.969 | 0.548 | 0 | CA3 | SLC35F3  |
| 0 | 1.00257288 | 0.962 | 0.452 | 0 | CA3 | FAM135B  |
| 0 | 0.98404705 | 0.941 | 0.584 | 0 | CA3 | NELL1    |
| 0 | 0.9816396  | 0.843 | 0.324 | 0 | CA3 | SLC47A1  |
| 0 | 0.97819698 | 0.94  | 0.553 | 0 | CA3 | PGBD5    |
| 0 | 0.97566688 | 0.944 | 0.485 | 0 | CA3 | GRIK5    |
| 0 | 0.96807369 | 0.867 | 0.388 | 0 | CA3 | GRIK4    |
| 0 | 0.9656116  | 0.254 | 0.079 | 0 | CA3 | HTR2C    |

|   |            |       |       |   |     |          |
|---|------------|-------|-------|---|-----|----------|
| 0 | 0.96540306 | 0.896 | 0.306 | 0 | CA3 | IQSEC3   |
| 0 | 0.9612536  | 0.948 | 0.427 | 0 | CA3 | SRRM4    |
| 0 | 0.95138623 | 0.538 | 0.353 | 0 | CA3 | RIMS1    |
| 0 | 0.94982884 | 0.988 | 0.601 | 0 | CA3 | CAMK2A   |
| 0 | 0.94599558 | 0.749 | 0.318 | 0 | CA3 | KIAA1217 |
| 0 | 0.94438317 | 0.692 | 0.153 | 0 | CA3 | SLC12A3  |
| 0 | 0.94350146 | 0.995 | 0.754 | 0 | CA3 | NELL2    |
| 0 | 0.94062843 | 0.942 | 0.519 | 0 | CA3 | EFR3A    |
| 0 | 0.94043797 | 0.935 | 0.44  | 0 | CA3 | SCN3B    |
| 0 | 0.93951858 | 0.856 | 0.274 | 0 | CA3 | RASGRP1  |
| 0 | 0.93354964 | 0.975 | 0.552 | 0 | CA3 | NOS1AP   |
| 0 | 0.93334979 | 0.994 | 0.658 | 0 | CA3 | DYNC111  |
| 0 | 0.93127501 | 0.998 | 0.88  | 0 | CA3 | MAPK10   |
| 0 | 0.93087446 | 0.641 | 0.099 | 0 | CA3 | NPFRR2   |
| 0 | 0.92863107 | 0.881 | 0.364 | 0 | CA3 | ADAMTS3  |
| 0 | 0.92583683 | 0.992 | 0.762 | 0 | CA3 | ERC1     |
| 0 | 0.92234954 | 0.874 | 0.269 | 0 | CA3 | ELAVL2   |
| 0 | 0.92075058 | 0.921 | 0.462 | 0 | CA3 | CDH11    |
| 0 | 0.92058845 | 0.99  | 0.634 | 0 | CA3 | TMEM178B |
| 0 | 0.91509018 | 0.822 | 0.184 | 0 | CA3 | RAB26    |
| 0 | 0.9133213  | 0.979 | 0.554 | 0 | CA3 | LDB2     |
| 0 | 0.90965019 | 0.995 | 0.67  | 0 | CA3 | CACNA1A  |
| 0 | 0.9091082  | 0.99  | 0.672 | 0 | CA3 | SLC44A5  |
| 0 | 0.90780777 | 0.991 | 0.634 | 0 | CA3 | KCNMA1   |
| 0 | 0.90183108 | 0.969 | 0.619 | 0 | CA3 | EPHA5    |
| 0 | 0.90065795 | 0.981 | 0.657 | 0 | CA3 | MSRA     |
| 0 | 0.89943437 | 0.844 | 0.792 | 0 | CA3 | UNC5C    |
| 0 | 0.89764618 | 0.862 | 0.303 | 0 | CA3 | SIDT1    |
| 0 | 0.87523655 | 0.962 | 0.521 | 0 | CA3 | APBA2    |
| 0 | 0.87106591 | 0.924 | 0.358 | 0 | CA3 | ADAM11   |
| 0 | 0.87010102 | 0.963 | 0.564 | 0 | CA3 | PLXNA4   |
| 0 | 0.85042509 | 0.914 | 0.451 | 0 | CA3 | MYO16    |
| 0 | 0.84710524 | 0.991 | 0.741 | 0 | CA3 | AAK1     |
| 0 | 0.84335135 | 0.987 | 0.557 | 0 | CA3 | HSPA12A  |
| 0 | 0.84239799 | 0.963 | 0.491 | 0 | CA3 | PTPRR    |
| 0 | 0.83975385 | 0.982 | 0.588 | 0 | CA3 | NIN      |
| 0 | 0.83680774 | 0.989 | 0.719 | 0 | CA3 | CAMK1D   |
| 0 | 0.83484391 | 0.995 | 0.844 | 0 | CA3 | DOCK4    |
| 0 | 0.83384403 | 0.793 | 0.222 | 0 | CA3 | SORCS2   |
| 0 | 0.82797475 | 0.987 | 0.73  | 0 | CA3 | ARL15    |
| 0 | 0.82533285 | 0.867 | 0.541 | 0 | CA3 | CDH12    |

|   |            |       |       |   |     |           |
|---|------------|-------|-------|---|-----|-----------|
| 0 | 0.81705432 | 0.99  | 0.676 | 0 | CA3 | SYN2      |
| 0 | 0.81210583 | 0.85  | 0.393 | 0 | CA3 | SYNDIG1   |
| 0 | 0.80833805 | 0.777 | 0.376 | 0 | CA3 | PRICKLE1  |
| 0 | 0.80753379 | 0.857 | 0.312 | 0 | CA3 | SULF2     |
| 0 | 0.80714489 | 0.906 | 0.471 | 0 | CA3 | SNTG1     |
| 0 | 0.80357372 | 0.961 | 0.779 | 0 | CA3 | TMTC1     |
| 0 | 0.80296651 | 0.546 | 0.126 | 0 | CA3 | PTGER3    |
| 0 | 0.80038369 | 0.859 | 0.313 | 0 | CA3 | NPTX1     |
| 0 | 0.79262868 | 0.992 | 0.738 | 0 | CA3 | SNAP25    |
| 0 | 0.79258911 | 0.835 | 0.27  | 0 | CA3 | SLC6A7    |
| 0 | 0.79233444 | 0.632 | 0.133 | 0 | CA3 | NRIP3     |
| 0 | 0.79029257 | 1     | 0.918 | 0 | CA3 | CSMD1     |
| 0 | 0.79018294 | 0.982 | 0.559 | 0 | CA3 | KCNJ6     |
| 0 | 0.7885015  | 0.872 | 0.382 | 0 | CA3 | ANKRD33B  |
| 0 | 0.78748124 | 0.725 | 0.132 | 0 | CA3 | SEMA5B    |
| 0 | 0.78735784 | 0.767 | 0.285 | 0 | CA3 | OVCH1     |
| 0 | 0.78558106 | 0.999 | 0.923 | 0 | CA3 | RBFOX1    |
| 0 | 0.78150146 | 0.839 | 0.454 | 0 | CA3 | MPPED2    |
| 0 | 0.778324   | 0.982 | 0.655 | 0 | CA3 | ATP2B1    |
| 0 | 0.77665363 | 0.995 | 0.757 | 0 | CA3 | OXR1      |
| 0 | 0.77627372 | 0.95  | 0.531 | 0 | CA3 | TENM3     |
| 0 | 0.77517708 | 0.99  | 0.619 | 0 | CA3 | DNM1      |
| 0 | 0.77492549 | 1     | 0.892 | 0 | CA3 | SYT1      |
| 0 | 0.77443307 | 0.896 | 0.415 | 0 | CA3 | MAN1A1    |
| 0 | 0.77216164 | 0.977 | 0.523 | 0 | CA3 | SGSM1     |
| 0 | 0.7718299  | 0.981 | 0.67  | 0 | CA3 | FOCAD     |
| 0 | 0.76617268 | 0.825 | 0.29  | 0 | CA3 | HTR4      |
| 0 | 0.76315957 | 0.831 | 0.286 | 0 | CA3 | SEMA3E    |
| 0 | 0.75950843 | 0.992 | 0.663 | 0 | CA3 | FRMPD4    |
| 0 | 0.75527558 | 0.963 | 0.443 | 0 | CA3 | KIAA1211L |
| 0 | 0.75431331 | 0.401 | 0.058 | 0 | CA3 | NPNT      |
| 0 | 0.75357537 | 0.597 | 0.15  | 0 | CA3 | CBLN2     |
| 0 | 0.75173746 | 0.982 | 0.614 | 0 | CA3 | NAV3      |
| 0 | 0.75168673 | 0.999 | 0.865 | 0 | CA3 | CCSER1    |
| 0 | 0.75045086 | 0.997 | 0.733 | 0 | CA3 | GRIN2B    |
| 0 | 0.74761862 | 0.862 | 0.357 | 0 | CA3 | KIAA1671  |
| 0 | 0.74687332 | 0.888 | 0.433 | 0 | CA3 | PTK2B     |
| 0 | 0.74649984 | 0.986 | 0.654 | 0 | CA3 | XKR4      |
| 0 | 0.74535452 | 0.992 | 0.709 | 0 | CA3 | ARHGAP26  |
| 0 | 0.74429534 | 0.962 | 0.453 | 0 | CA3 | MTUS2     |
| 0 | 0.74269882 | 0.991 | 0.762 | 0 | CA3 | MAP1B     |

|           |            |       |       |           |             |         |
|-----------|------------|-------|-------|-----------|-------------|---------|
| 0         | 0.741775   | 0.994 | 0.632 | 0         | CA3         | XYLT1   |
| 0         | 0.74039806 | 0.795 | 0.368 | 0         | CA3         | TANC1   |
| 1.36E-35  | 1.63532112 | 0.534 | 0.421 | 1.86E-31  | Endothelial | SLC12A2 |
| 1.46E-37  | 1.53598059 | 0.768 | 0.75  | 1.99E-33  | Endothelial | ARL15   |
| 1.06E-46  | 1.50347819 | 0.518 | 0.347 | 1.45E-42  | Endothelial | ADGRL2  |
| 5.06E-49  | 1.6162881  | 0.13  | 0.028 | 6.92E-45  | Endothelial | RGS5    |
| 1.00E-50  | 1.47829217 | 0.618 | 0.513 | 1.37E-46  | Endothelial | ARFGEF2 |
| 5.41E-56  | 1.73243769 | 0.423 | 0.217 | 7.40E-52  | Endothelial | NAMPT   |
| 1.05E-58  | 1.75716223 | 0.538 | 0.34  | 1.44E-54  | Endothelial | SGMS1   |
| 1.06E-61  | 1.50450637 | 0.555 | 0.332 | 1.46E-57  | Endothelial | FAT4    |
| 9.10E-62  | 1.58087813 | 0.555 | 0.367 | 1.25E-57  | Endothelial | MYH9    |
| 1.45E-62  | 2.04007337 | 0.564 | 0.382 | 1.99E-58  | Endothelial | INSR    |
| 4.47E-66  | 1.68520223 | 0.542 | 0.333 | 6.11E-62  | Endothelial | CLINT1  |
| 2.00E-66  | 1.64488419 | 0.464 | 0.234 | 2.73E-62  | Endothelial | SHROOM2 |
| 4.40E-69  | 1.54097271 | 0.455 | 0.22  | 6.01E-65  | Endothelial | CD2AP   |
| 1.87E-69  | 1.65207503 | 0.607 | 0.416 | 2.56E-65  | Endothelial | WWC2    |
| 4.86E-70  | 1.71923295 | 0.499 | 0.27  | 6.64E-66  | Endothelial | SNRK    |
| 3.96E-70  | 1.59416575 | 0.603 | 0.412 | 5.41E-66  | Endothelial | CTNNB1  |
| 7.56E-72  | 1.80911605 | 0.484 | 0.235 | 1.03E-67  | Endothelial | ST6GAL1 |
| 2.85E-74  | 1.67913039 | 0.475 | 0.233 | 3.90E-70  | Endothelial | HERPUD1 |
| 1.09E-74  | 1.89720974 | 0.622 | 0.45  | 1.49E-70  | Endothelial | RUNDC3B |
| 6.00E-77  | 1.57869767 | 0.703 | 0.527 | 8.21E-73  | Endothelial | PPFIBP1 |
| 1.09E-77  | 1.81338633 | 0.557 | 0.326 | 1.49E-73  | Endothelial | SGPP2   |
| 1.47E-78  | 1.64854707 | 0.636 | 0.429 | 2.01E-74  | Endothelial | ACVR1   |
| 9.47E-79  | 1.51498505 | 0.642 | 0.417 | 1.30E-74  | Endothelial | CTNND1  |
| 2.44E-79  | 1.52861007 | 0.499 | 0.24  | 3.34E-75  | Endothelial | CFLAR   |
| 1.94E-82  | 1.93852373 | 0.66  | 0.492 | 2.65E-78  | Endothelial | ESYT2   |
| 2.86E-84  | 2.1931917  | 0.672 | 0.464 | 3.91E-80  | Endothelial | IGF1R   |
| 2.06E-84  | 1.91071489 | 0.588 | 0.351 | 2.82E-80  | Endothelial | ATL2    |
| 3.62E-92  | 1.53792542 | 0.503 | 0.201 | 4.95E-88  | Endothelial | GSN     |
| 1.37E-94  | 1.50924754 | 0.826 | 0.693 | 1.87E-90  | Endothelial | FOXP1   |
| 4.04E-97  | 1.49374935 | 0.8   | 0.659 | 5.53E-93  | Endothelial | MRTFB   |
| 2.31E-100 | 1.84938858 | 0.518 | 0.216 | 3.16E-96  | Endothelial | TIMP3   |
| 9.54E-102 | 2.18673983 | 0.538 | 0.25  | 1.31E-97  | Endothelial | ACER2   |
| 5.42E-104 | 1.4783007  | 0.425 | 0.138 | 7.41E-100 | Endothelial | RASSF3  |
| 1.50E-111 | 1.97071593 | 0.57  | 0.262 | 2.04E-107 | Endothelial | NXN     |
| 1.72E-113 | 1.88364852 | 0.482 | 0.179 | 2.35E-109 | Endothelial | RHOBTB1 |
| 7.16E-114 | 1.49035449 | 0.351 | 0.093 | 9.79E-110 | Endothelial | EXPH5   |
| 2.37E-114 | 1.66577696 | 0.466 | 0.152 | 3.25E-110 | Endothelial | TRPM6   |
| 8.63E-115 | 1.49616029 | 0.308 | 0.07  | 1.18E-110 | Endothelial | RBPM5   |
| 1.19E-115 | 1.68430356 | 0.688 | 0.355 | 1.62E-111 | Endothelial | LDLRAD3 |

|           |            |       |       |           |             |            |
|-----------|------------|-------|-------|-----------|-------------|------------|
| 4.49E-116 | 2.00707291 | 0.737 | 0.519 | 6.14E-112 | Endothelial | SLC39A10   |
| 1.41E-116 | 1.81711825 | 0.575 | 0.25  | 1.93E-112 | Endothelial | RBMS1      |
| 3.37E-117 | 1.51462727 | 0.353 | 0.091 | 4.61E-113 | Endothelial | JCAD       |
| 4.94E-118 | 1.96937546 | 0.714 | 0.479 | 6.76E-114 | Endothelial | LMBR1      |
| 1.59E-119 | 1.89214604 | 0.866 | 0.77  | 2.17E-115 | Endothelial | TSPAN5     |
| 1.66E-120 | 1.6746261  | 0.308 | 0.069 | 2.27E-116 | Endothelial | CD320      |
| 4.30E-121 | 1.77237249 | 0.842 | 0.635 | 5.88E-117 | Endothelial | MYRIP      |
| 3.60E-121 | 1.76990195 | 0.722 | 0.379 | 4.92E-117 | Endothelial | LHFPL6     |
| 1.62E-122 | 2.11224791 | 0.638 | 0.319 | 2.21E-118 | Endothelial | GPCPD1     |
| 1.15E-129 | 1.48557392 | 0.889 | 0.83  | 1.58E-125 | Endothelial | SPTBN1     |
| 4.98E-134 | 1.72642902 | 0.284 | 0.054 | 6.81E-130 | Endothelial | ADGRG6     |
| 2.98E-136 | 1.67332544 | 0.36  | 0.084 | 4.08E-132 | Endothelial | NEDD9      |
| 6.47E-138 | 1.73434595 | 0.471 | 0.14  | 8.84E-134 | Endothelial | UACA       |
| 4.30E-143 | 2.14559266 | 0.603 | 0.233 | 5.89E-139 | Endothelial | CSGALNACT1 |
| 2.27E-145 | 2.09382058 | 0.536 | 0.187 | 3.11E-141 | Endothelial | TFRC       |
| 1.75E-150 | 1.77249849 | 0.57  | 0.184 | 2.39E-146 | Endothelial | PDLIM5     |
| 2.41E-154 | 1.73012413 | 0.876 | 0.727 | 3.30E-150 | Endothelial | BMPR2      |
| 6.69E-156 | 1.9054088  | 0.85  | 0.581 | 9.15E-152 | Endothelial | ABLIM1     |
| 2.65E-156 | 1.86754863 | 0.887 | 0.737 | 3.63E-152 | Endothelial | DOCK9      |
| 4.05E-161 | 2.24846291 | 0.774 | 0.42  | 5.54E-157 | Endothelial | PLCB4      |
| 3.34E-163 | 2.24362518 | 0.204 | 0.024 | 4.56E-159 | Endothelial | IGFBP3     |
| 7.46E-173 | 2.27248475 | 0.547 | 0.162 | 1.02E-168 | Endothelial | MYO10      |
| 2.73E-177 | 1.5082693  | 0.332 | 0.059 | 3.74E-173 | Endothelial | RPH3AL     |
| 5.94E-181 | 2.26883389 | 0.623 | 0.215 | 8.13E-177 | Endothelial | ITGA6      |
| 9.74E-191 | 1.78471357 | 0.438 | 0.097 | 1.33E-186 | Endothelial | ADGRA2     |
| 8.66E-194 | 1.97575609 | 0.607 | 0.182 | 1.18E-189 | Endothelial | FGD6       |
| 3.44E-200 | 1.63058763 | 0.991 | 0.843 | 4.71E-196 | Endothelial | PTPRG      |
| 1.08E-201 | 2.37135892 | 0.518 | 0.132 | 1.48E-197 | Endothelial | NET1       |
| 1.79E-204 | 1.49168521 | 0.356 | 0.059 | 2.45E-200 | Endothelial | DOCK6      |
| 5.61E-214 | 1.86662643 | 0.436 | 0.083 | 7.67E-210 | Endothelial | LAMA4      |
| 5.46E-224 | 2.34455704 | 0.547 | 0.134 | 7.47E-220 | Endothelial | DACH1      |
| 1.23E-230 | 2.19007733 | 0.638 | 0.182 | 1.68E-226 | Endothelial | FMNL3      |
| 3.23E-236 | 2.53071493 | 0.57  | 0.141 | 4.41E-232 | Endothelial | JAM2       |
| 5.16E-239 | 2.0007557  | 0.722 | 0.204 | 7.06E-235 | Endothelial | CLIC4      |
| 1.46E-239 | 2.65208221 | 0.803 | 0.359 | 2.00E-235 | Endothelial | PTPRB      |
| 2.55E-243 | 1.91895933 | 0.473 | 0.092 | 3.48E-239 | Endothelial | TEK        |
| 1.57E-244 | 1.79849543 | 0.382 | 0.059 | 2.14E-240 | Endothelial | BACE2      |
| 9.74E-245 | 1.77147501 | 0.391 | 0.061 | 1.33E-240 | Endothelial | IGF2BP2    |
| 9.18E-248 | 1.80976232 | 0.384 | 0.059 | 1.26E-243 | Endothelial | PLAT       |
| 2.67E-253 | 2.04755879 | 0.649 | 0.171 | 3.65E-249 | Endothelial | SYNE2      |
| 6.04E-258 | 2.04287344 | 0.417 | 0.067 | 8.26E-254 | Endothelial | FN1        |

|           |            |       |       |           |             |          |
|-----------|------------|-------|-------|-----------|-------------|----------|
| 2.67E-259 | 1.52407799 | 0.367 | 0.05  | 3.65E-255 | Endothelial | LMCD1    |
| 6.93E-264 | 1.68414046 | 0.404 | 0.061 | 9.48E-260 | Endothelial | LIMS2    |
| 2.23E-268 | 1.86640636 | 0.503 | 0.093 | 3.06E-264 | Endothelial | SP100    |
| 3.21E-272 | 1.48559306 | 0.34  | 0.042 | 4.39E-268 | Endothelial | RIN3     |
| 4.45E-275 | 1.51121824 | 0.354 | 0.045 | 6.09E-271 | Endothelial | FZD6     |
| 1.24E-276 | 2.52912962 | 0.792 | 0.242 | 1.70E-272 | Endothelial | TMEM132C |
| 4.09E-279 | 2.58765492 | 0.445 | 0.072 | 5.59E-275 | Endothelial | IGFBP7   |
| 1.32E-281 | 1.97249451 | 0.575 | 0.114 | 1.80E-277 | Endothelial | ARHGAP31 |
| 9.00E-284 | 1.82343715 | 0.425 | 0.064 | 1.23E-279 | Endothelial | ST3GAL1  |
| 7.52E-285 | 1.81367946 | 0.416 | 0.059 | 1.03E-280 | Endothelial | PROM1    |
| 4.66E-291 | 2.03772518 | 0.508 | 0.091 | 6.38E-287 | Endothelial | TNS1     |
| 9.36E-293 | 2.52316538 | 0.668 | 0.167 | 1.28E-288 | Endothelial | HEG1     |
| 1.31E-294 | 1.7543999  | 0.429 | 0.063 | 1.79E-290 | Endothelial | TMEM44   |
| 4.35E-296 | 2.06299056 | 0.551 | 0.104 | 5.96E-292 | Endothelial | RCSD1    |
| 1.17E-303 | 2.60049864 | 0.933 | 0.39  | 1.60E-299 | Endothelial | PTPRM    |
| 0         | 4.65076873 | 0.907 | 0.04  | 0         | Endothelial | MECOM    |
| 0         | 4.63351777 | 0.885 | 0.021 | 0         | Endothelial | FLT1     |
| 0         | 4.10947162 | 0.852 | 0.206 | 0         | Endothelial | SLC7A1   |
| 0         | 3.72236157 | 0.885 | 0.365 | 0         | Endothelial | TBC1D4   |
| 0         | 3.70371268 | 0.835 | 0.039 | 0         | Endothelial | EPAS1    |
| 0         | 3.6795358  | 0.787 | 0.066 | 0         | Endothelial | EBF1     |
| 0         | 3.49434956 | 0.82  | 0.045 | 0         | Endothelial | FLI1     |
| 0         | 3.46003925 | 0.733 | 0.036 | 0         | Endothelial | EMCN     |
| 0         | 3.36880647 | 0.718 | 0.013 | 0         | Endothelial | ADGRL4   |
| 0         | 3.3146918  | 0.738 | 0.016 | 0         | Endothelial | LEF1     |
| 0         | 3.25142713 | 0.764 | 0.05  | 0         | Endothelial | ERG      |
| 0         | 3.17313928 | 0.72  | 0.071 | 0         | Endothelial | ABCB1    |
| 0         | 3.14694826 | 0.746 | 0.094 | 0         | Endothelial | EGFL7    |
| 0         | 3.09046993 | 0.85  | 0.216 | 0         | Endothelial | UTRN     |
| 0         | 3.0720869  | 0.742 | 0.141 | 0         | Endothelial | CYYR1    |
| 0         | 3.04467115 | 0.668 | 0.09  | 0         | Endothelial | SLC2A1   |
| 0         | 2.89314125 | 0.657 | 0.148 | 0         | Endothelial | PODXL    |
| 0         | 2.81906871 | 0.668 | 0.119 | 0         | Endothelial | SLCO1A2  |
| 0         | 2.77874624 | 0.56  | 0.077 | 0         | Endothelial | HMCN1    |
| 0         | 2.745828   | 0.612 | 0.044 | 0         | Endothelial | GALNT15  |
| 0         | 2.72396319 | 0.579 | 0.013 | 0         | Endothelial | ADGRF5   |
| 0         | 2.72346435 | 0.547 | 0.086 | 0         | Endothelial | SLCO1B1  |
| 0         | 2.66087489 | 0.417 | 0.017 | 0         | Endothelial | ITM2A    |
| 0         | 2.64679043 | 0.826 | 0.237 | 0         | Endothelial | RBMS3    |
| 0         | 2.62117398 | 0.592 | 0.115 | 0         | Endothelial | VWF      |
| 0         | 2.6207345  | 0.584 | 0.031 | 0         | Endothelial | PECAM1   |

|           |            |       |       |           |             |          |
|-----------|------------|-------|-------|-----------|-------------|----------|
| 0         | 2.5923772  | 0.534 | 0.02  | 0         | Endothelial | CGNL1    |
| 0         | 2.46771395 | 0.518 | 0.013 | 0         | Endothelial | SLC38A5  |
| 0         | 2.43705422 | 0.516 | 0.002 | 0         | Endothelial | TNFSF10  |
| 0         | 2.3792392  | 0.551 | 0.039 | 0         | Endothelial | ENG      |
| 0         | 2.33411368 | 0.586 | 0.067 | 0         | Endothelial | ARHGAP29 |
| 0         | 2.29352012 | 0.583 | 0.045 | 0         | Endothelial | SLCO2B1  |
| 0         | 2.17844941 | 0.399 | 0.012 | 0         | Endothelial | SMAD6    |
| 0         | 2.14087708 | 0.531 | 0.035 | 0         | Endothelial | TRIM22   |
| 0         | 2.11188231 | 0.505 | 0.065 | 0         | Endothelial | PGM5     |
| 0         | 2.08957799 | 0.514 | 0.041 | 0         | Endothelial | IFI16    |
| 0         | 2.06299835 | 0.549 | 0.091 | 0         | Endothelial | CDC14A   |
| 0         | 1.93130073 | 0.456 | 0.058 | 0         | Endothelial | PRTG     |
| 0         | 1.87604537 | 0.414 | 0.035 | 0         | Endothelial | ETS1     |
| 0         | 1.86301338 | 0.347 | 0.036 | 0         | Endothelial | CLEC3B   |
| 0         | 1.8377818  | 0.345 | 0.023 | 0         | Endothelial | ITGA1    |
| 0         | 1.83379599 | 0.38  | 0.02  | 0         | Endothelial | TFPI     |
| 0         | 1.82582897 | 0.406 | 0.031 | 0         | Endothelial | OCLN     |
| 0         | 1.80516309 | 0.416 | 0.038 | 0         | Endothelial | AHNAK    |
| 0         | 1.79394232 | 0.384 | 0.016 | 0         | Endothelial | NOSTRIN  |
| 0         | 1.75798438 | 0.341 | 0.026 | 0         | Endothelial | FLVCR2   |
| 0         | 1.74161632 | 0.46  | 0.059 | 0         | Endothelial | TGFBR2   |
| 0         | 1.73766087 | 0.223 | 0.006 | 0         | Endothelial | IFI27    |
| 0         | 1.72563786 | 0.356 | 0.03  | 0         | Endothelial | SLC39A8  |
| 0         | 1.72124187 | 0.336 | 0.015 | 0         | Endothelial | ITIH5    |
| 0         | 1.71738521 | 0.31  | 0.002 | 0         | Endothelial | KANK3    |
| 0         | 1.66722003 | 0.314 | 0.024 | 0         | Endothelial | WWTR1    |
| 0         | 1.63781828 | 0.354 | 0.024 | 0         | Endothelial | FGD5     |
| 0         | 1.6328413  | 0.278 | 0.008 | 0         | Endothelial | ID1      |
| 0         | 1.5464734  | 0.321 | 0.008 | 0         | Endothelial | PAQR5    |
| 3.82E-24  | 1.66703648 | 0.297 | 0.195 | 5.23E-20  | Ependymal   | SLC24A4  |
| 1.44E-61  | 1.89200792 | 0.454 | 0.273 | 1.97E-57  | Ependymal   | SDK1     |
| 1.40E-90  | 2.01248586 | 0.227 | 0.062 | 1.91E-86  | Ependymal   | RBM47    |
| 2.34E-146 | 1.73760522 | 0.211 | 0.038 | 3.19E-142 | Ependymal   | SLC13A4  |
| 1.41E-146 | 2.00707729 | 0.404 | 0.13  | 1.93E-142 | Ependymal   | MALRD1   |
| 1.47E-152 | 2.02795267 | 0.193 | 0.031 | 2.01E-148 | Ependymal   | PRLR     |
| 6.94E-153 | 1.89396849 | 0.302 | 0.072 | 9.49E-149 | Ependymal   | IGFBP7   |
| 7.06E-172 | 1.76953103 | 0.745 | 0.434 | 9.65E-168 | Ependymal   | ANKRD44  |
| 2.16E-172 | 1.66224311 | 0.377 | 0.098 | 2.95E-168 | Ependymal   | ITPKB    |
| 5.99E-174 | 1.94843686 | 0.226 | 0.038 | 8.20E-170 | Ependymal   | SLC39A12 |
| 3.53E-178 | 2.86187763 | 0.223 | 0.036 | 4.83E-174 | Ependymal   | TTR      |
| 5.92E-198 | 3.72407455 | 0.38  | 0.091 | 8.10E-194 | Ependymal   | HTR2C    |

|           |            |       |       |           |           |          |
|-----------|------------|-------|-------|-----------|-----------|----------|
| 2.21E-220 | 1.68827302 | 0.714 | 0.355 | 3.02E-216 | Ependymal | TMEM67   |
| 5.04E-224 | 1.70239944 | 0.402 | 0.094 | 6.89E-220 | Ependymal | AK1      |
| 1.17E-225 | 1.98759581 | 0.37  | 0.078 | 1.60E-221 | Ependymal | SULF1    |
| 8.50E-226 | 1.73632543 | 0.637 | 0.258 | 1.16E-221 | Ependymal | TTC26    |
| 3.37E-227 | 1.77676546 | 0.728 | 0.362 | 4.60E-223 | Ependymal | CASC1    |
| 1.24E-232 | 1.84366913 | 0.841 | 0.53  | 1.69E-228 | Ependymal | NEK10    |
| 6.81E-236 | 1.99801789 | 0.687 | 0.29  | 9.32E-232 | Ependymal | FAM184A  |
| 8.66E-245 | 1.69304025 | 0.558 | 0.173 | 1.18E-240 | Ependymal | STPG4    |
| 3.02E-248 | 1.84168996 | 0.879 | 0.589 | 4.13E-244 | Ependymal | ULK4     |
| 4.11E-249 | 2.00657876 | 0.864 | 0.569 | 5.62E-245 | Ependymal | CCDC30   |
| 2.31E-250 | 2.11109165 | 0.92  | 0.685 | 3.16E-246 | Ependymal | DTNA     |
| 1.21E-252 | 2.0127755  | 0.807 | 0.462 | 1.65E-248 | Ependymal | CEP126   |
| 3.21E-256 | 1.83465746 | 0.824 | 0.473 | 4.39E-252 | Ependymal | MOK      |
| 2.94E-258 | 1.65855043 | 0.991 | 0.742 | 4.02E-254 | Ependymal | PRKG1    |
| 1.22E-264 | 1.98192983 | 0.765 | 0.356 | 1.67E-260 | Ependymal | IQCA1    |
| 1.82E-271 | 2.06027033 | 0.768 | 0.369 | 2.49E-267 | Ependymal | CFAP221  |
| 5.21E-272 | 2.3343208  | 0.838 | 0.426 | 7.12E-268 | Ependymal | RGS6     |
| 6.21E-273 | 1.8469533  | 0.869 | 0.517 | 8.50E-269 | Ependymal | FBXL13   |
| 1.78E-275 | 1.77893194 | 0.639 | 0.217 | 2.44E-271 | Ependymal | FANK1    |
| 2.00E-282 | 1.91533214 | 0.865 | 0.526 | 2.73E-278 | Ependymal | ARMC2    |
| 1.69E-282 | 1.93125701 | 0.751 | 0.327 | 2.31E-278 | Ependymal | CCDC138  |
| 2.33E-287 | 2.03812799 | 0.906 | 0.595 | 3.19E-283 | Ependymal | SPAG16   |
| 5.94E-293 | 1.95461546 | 0.843 | 0.418 | 8.12E-289 | Ependymal | PLCB4    |
| 1.21E-303 | 1.74157071 | 0.765 | 0.256 | 1.66E-299 | Ependymal | SOX6     |
| 1.51E-306 | 2.1300221  | 0.801 | 0.354 | 2.06E-302 | Ependymal | CABCOCO1 |
| 0         | 4.20418351 | 0.927 | 0.217 | 0         | Ependymal | CFAP54   |
| 0         | 4.06017495 | 0.946 | 0.162 | 0         | Ependymal | HYDIN    |
| 0         | 3.97741543 | 0.979 | 0.438 | 0         | Ependymal | DNAH9    |
| 0         | 3.93693365 | 0.899 | 0.041 | 0         | Ependymal | DNAH11   |
| 0         | 3.63433379 | 0.918 | 0.341 | 0         | Ependymal | TMEM232  |
| 0         | 3.50742113 | 0.886 | 0.236 | 0         | Ependymal | CCDC146  |
| 0         | 3.47682855 | 0.964 | 0.365 | 0         | Ependymal | NEK11    |
| 0         | 3.46077693 | 0.958 | 0.355 | 0         | Ependymal | DNAH6    |
| 0         | 3.41434958 | 0.829 | 0.03  | 0         | Ependymal | ZBBX     |
| 0         | 3.40648202 | 0.84  | 0.12  | 0         | Ependymal | DRC3     |
| 0         | 3.40112945 | 0.747 | 0.015 | 0         | Ependymal | SLC47A2  |
| 0         | 3.35342241 | 0.845 | 0.094 | 0         | Ependymal | LRRIQ1   |
| 0         | 3.32874926 | 0.738 | 0.043 | 0         | Ependymal | ADGB     |
| 0         | 3.28337516 | 0.836 | 0.121 | 0         | Ependymal | DNAH7    |
| 0         | 3.2444309  | 0.866 | 0.105 | 0         | Ependymal | CCDC60   |
| 0         | 3.22250402 | 0.832 | 0.044 | 0         | Ependymal | SPAG17   |



|   |            |       |       |   |           |          |
|---|------------|-------|-------|---|-----------|----------|
| 0 | 3.21641079 | 0.936 | 0.263 | 0 | Ependymal | CFAP70   |
| 0 | 3.14878318 | 0.85  | 0.008 | 0 | Ependymal | ARMC3    |
| 0 | 3.13286958 | 0.827 | 0.046 | 0 | Ependymal | FHAD1    |
| 0 | 3.13271598 | 0.852 | 0.161 | 0 | Ependymal | CFAP46   |
| 0 | 3.12470655 | 0.791 | 0.033 | 0 | Ependymal | SPATA17  |
| 0 | 3.10282737 | 0.856 | 0.031 | 0 | Ependymal | LRRC9    |
| 0 | 3.06316627 | 0.881 | 0.111 | 0 | Ependymal | CFAP44   |
| 0 | 3.04188787 | 0.932 | 0.289 | 0 | Ependymal | SPEF2    |
| 0 | 2.97275724 | 0.732 | 0.098 | 0 | Ependymal | DNAH10   |
| 0 | 2.94842828 | 0.811 | 0.126 | 0 | Ependymal | VWA3B    |
| 0 | 2.89363091 | 0.751 | 0.107 | 0 | Ependymal | DNAH2    |
| 0 | 2.86441943 | 0.791 | 0.315 | 0 | Ependymal | CRB1     |
| 0 | 2.85346517 | 0.825 | 0.1   | 0 | Ependymal | KIF27    |
| 0 | 2.83851724 | 0.716 | 0.085 | 0 | Ependymal | DNAH3    |
| 0 | 2.82777481 | 0.897 | 0.199 | 0 | Ependymal | PLEKHA7  |
| 0 | 2.79287093 | 0.884 | 0.295 | 0 | Ependymal | KIAA2012 |
| 0 | 2.77229233 | 0.769 | 0.047 | 0 | Ependymal | WDR63    |
| 0 | 2.76971903 | 0.737 | 0.123 | 0 | Ependymal | ANKFN1   |
| 0 | 2.67293412 | 0.8   | 0.158 | 0 | Ependymal | CROCC    |
| 0 | 2.66483539 | 0.761 | 0.058 | 0 | Ependymal | SPAG6    |
| 0 | 2.66286652 | 0.67  | 0.042 | 0 | Ependymal | CFAP100  |
| 0 | 2.64079381 | 0.795 | 0.215 | 0 | Ependymal | EFCAB6   |
| 0 | 2.63794623 | 0.643 | 0.046 | 0 | Ependymal | LRRC36   |
| 0 | 2.60805408 | 0.882 | 0.245 | 0 | Ependymal | MYO1E    |
| 0 | 2.59534953 | 0.805 | 0.153 | 0 | Ependymal | PPIL6    |
| 0 | 2.59380026 | 0.693 | 0.072 | 0 | Ependymal | CFAP52   |
| 0 | 2.59046013 | 0.822 | 0.251 | 0 | Ependymal | LRRC6    |
| 0 | 2.57963427 | 0.738 | 0.043 | 0 | Ependymal | DNAI1    |
| 0 | 2.57727967 | 0.624 | 0.053 | 0 | Ependymal | FRMPD2   |
| 0 | 2.5666876  | 0.598 | 0.011 | 0 | Ependymal | PI15     |
| 0 | 2.56342533 | 0.841 | 0.214 | 0 | Ependymal | RFX2     |
| 0 | 2.56317136 | 0.687 | 0.071 | 0 | Ependymal | DTHD1    |
| 0 | 2.56033774 | 0.9   | 0.399 | 0 | Ependymal | WDR78    |
| 0 | 2.54879685 | 0.757 | 0.166 | 0 | Ependymal | VWA3A    |
| 0 | 2.52257879 | 0.779 | 0.291 | 0 | Ependymal | AK8      |
| 0 | 2.51449698 | 0.682 | 0.039 | 0 | Ependymal | NWD1     |
| 0 | 2.48472409 | 0.633 | 0.024 | 0 | Ependymal | ARMC4    |
| 0 | 2.4709338  | 0.614 | 0.015 | 0 | Ependymal | CCDC170  |
| 0 | 2.46490008 | 0.828 | 0.315 | 0 | Ependymal | CCDC173  |
| 0 | 2.45713573 | 0.659 | 0.072 | 0 | Ependymal | LMNTD1   |
| 0 | 2.44518414 | 0.612 | 0.153 | 0 | Ependymal | S100B    |

|   |            |       |       |   |           |         |
|---|------------|-------|-------|---|-----------|---------|
| 0 | 2.42277594 | 0.71  | 0.084 | 0 | Ependymal | PPP1R42 |
| 0 | 2.41337031 | 0.739 | 0.266 | 0 | Ependymal | ANKMY1  |
| 0 | 2.41109757 | 0.571 | 0.019 | 0 | Ependymal | TTC29   |
| 0 | 2.37777336 | 0.682 | 0.077 | 0 | Ependymal | AK9     |
| 0 | 2.36334217 | 0.75  | 0.125 | 0 | Ependymal | DRC1    |
| 0 | 2.35814342 | 0.752 | 0.151 | 0 | Ependymal | ECT2L   |
| 0 | 2.2993951  | 0.65  | 0.045 | 0 | Ependymal | CFAP73  |
| 0 | 2.28050259 | 0.792 | 0.339 | 0 | Ependymal | NME9    |
| 0 | 2.2706702  | 0.698 | 0.147 | 0 | Ependymal | PAMR1   |
| 0 | 2.25972663 | 0.62  | 0.088 | 0 | Ependymal | DNAH5   |
| 0 | 2.21158181 | 0.665 | 0.107 | 0 | Ependymal | EFCAB11 |
| 0 | 2.18116467 | 0.956 | 0.621 | 0 | Ependymal | PACRG   |
| 0 | 2.12787406 | 0.513 | 0.055 | 0 | Ependymal | KATNAL2 |
| 0 | 2.11744723 | 0.788 | 0.351 | 0 | Ependymal | CFAP69  |
| 0 | 2.09529113 | 0.614 | 0.002 | 0 | Ependymal | LHB     |
| 0 | 2.09278649 | 0.669 | 0.106 | 0 | Ependymal | TTL9    |
| 0 | 2.0496793  | 0.562 | 0.037 | 0 | Ependymal | C2orf73 |
| 0 | 2.04196927 | 0.788 | 0.349 | 0 | Ependymal | RGS22   |
| 0 | 2.0359992  | 0.705 | 0.257 | 0 | Ependymal | LRGUK   |
| 0 | 2.03306848 | 0.617 | 0.075 | 0 | Ependymal | CCDC40  |
| 0 | 2.03005595 | 0.671 | 0.217 | 0 | Ependymal | OCA2    |
| 0 | 2.01856873 | 0.607 | 0.041 | 0 | Ependymal | RIBC2   |
| 0 | 2.0036365  | 0.582 | 0.033 | 0 | Ependymal | TEKT1   |
| 0 | 1.99710534 | 0.543 | 0.06  | 0 | Ependymal | AK7     |
| 0 | 1.98036049 | 0.675 | 0.165 | 0 | Ependymal | PLCH1   |
| 0 | 1.93429837 | 0.507 | 0.053 | 0 | Ependymal | STK33   |
| 0 | 1.93162443 | 0.66  | 0.17  | 0 | Ependymal | SPAG1   |
| 0 | 1.91382021 | 0.543 | 0.08  | 0 | Ependymal | RSPH1   |
| 0 | 1.9074817  | 0.62  | 0.119 | 0 | Ependymal | CFAP74  |
| 0 | 1.90073894 | 0.985 | 0.744 | 0 | Ependymal | MSI2    |
| 0 | 1.89058284 | 0.598 | 0.108 | 0 | Ependymal | FAM227A |
| 0 | 1.88459947 | 0.573 | 0.033 | 0 | Ependymal | JHY     |
| 0 | 1.88106525 | 0.616 | 0.164 | 0 | Ependymal | MYCBPAP |
| 0 | 1.87408116 | 0.587 | 0.147 | 0 | Ependymal | WDR66   |
| 0 | 1.86233088 | 0.679 | 0.121 | 0 | Ependymal | TCF7L1  |
| 0 | 1.85670361 | 0.502 | 0.047 | 0 | Ependymal | BBOX1   |
| 0 | 1.85624989 | 0.58  | 0.064 | 0 | Ependymal | FBLN1   |
| 0 | 1.85187699 | 0.504 | 0.069 | 0 | Ependymal | CFAP77  |
| 0 | 1.84793307 | 0.999 | 0.919 | 0 | Ependymal | SYNE1   |
| 0 | 1.84198058 | 0.512 | 0.021 | 0 | Ependymal | DNAH1   |
| 0 | 1.83843208 | 0.549 | 0.069 | 0 | Ependymal | STK32A  |

|           |            |       |       |           |           |         |
|-----------|------------|-------|-------|-----------|-----------|---------|
| 0         | 1.83347365 | 0.614 | 0.106 | 0         | Ependymal | EFHC1   |
| 0         | 1.81720888 | 0.512 | 0.044 | 0         | Ependymal | ANKUB1  |
| 0         | 1.80288688 | 0.517 | 0.068 | 0         | Ependymal | CDKL4   |
| 0         | 1.80159932 | 0.558 | 0.123 | 0         | Ependymal | NEK5    |
| 0         | 1.78309721 | 0.556 | 0.091 | 0         | Ependymal | IQCG    |
| 0         | 1.7655736  | 0.574 | 0.151 | 0         | Ependymal | DNAJB13 |
| 0         | 1.72428867 | 0.498 | 0.059 | 0         | Ependymal | MAK     |
| 0         | 1.70479002 | 0.471 | 0.027 | 0         | Ependymal | LRRC23  |
| 0         | 1.70416457 | 0.497 | 0.1   | 0         | Ependymal | MAP3K19 |
| 0         | 1.69433153 | 0.487 | 0.022 | 0         | Ependymal | CCDC180 |
| 0         | 1.69248157 | 0.547 | 0.086 | 0         | Ependymal | SNTB1   |
| 0         | 1.68040598 | 0.406 | 0.043 | 0         | Ependymal | DCDC2   |
| 0         | 1.66136901 | 0.493 | 0.002 | 0         | Ependymal | FAM81B  |
| 0         | 1.65723323 | 0.353 | 0.034 | 0         | Ependymal | SLC28A1 |
| 3.53E-306 | 1.01276588 | 0.609 | 0.473 | 4.82E-302 | GABAergic | THSD7A  |
| 0         | 3.59077997 | 0.628 | 0.536 | 0         | GABAergic | ADARB2  |
| 0         | 3.37714109 | 0.923 | 0.365 | 0         | GABAergic | GRIK1   |
| 0         | 2.91875398 | 0.72  | 0.2   | 0         | GABAergic | NXPH1   |
| 0         | 2.89107729 | 0.875 | 0.474 | 0         | GABAergic | GALNTL6 |
| 0         | 2.80763615 | 0.988 | 0.534 | 0         | GABAergic | KCNC2   |
| 0         | 2.79487102 | 0.968 | 0.784 | 0         | GABAergic | ERBB4   |
| 0         | 2.49983642 | 0.719 | 0.146 | 0         | GABAergic | PTCHD4  |
| 0         | 2.46980067 | 0.893 | 0.172 | 0         | GABAergic | RBMS3   |
| 0         | 2.43377781 | 0.828 | 0.039 | 0         | GABAergic | GAD2    |
| 0         | 2.38642598 | 0.91  | 0.086 | 0         | GABAergic | NHS     |
| 0         | 2.30157613 | 0.799 | 0.35  | 0         | GABAergic | PTPRM   |
| 0         | 2.26867102 | 0.675 | 0.038 | 0         | GABAergic | BTBD11  |
| 0         | 2.23840181 | 0.811 | 0.344 | 0         | GABAergic | GRIA4   |
| 0         | 2.20995793 | 0.907 | 0.135 | 0         | GABAergic | GAD1    |
| 0         | 2.17943423 | 0.891 | 0.203 | 0         | GABAergic | UBASH3B |
| 0         | 2.13018182 | 0.752 | 0.372 | 0         | GABAergic | CDH13   |
| 0         | 1.96284492 | 1     | 0.845 | 0         | GABAergic | CNTNAP2 |
| 0         | 1.94893041 | 0.524 | 0.342 | 0         | GABAergic | RELN    |
| 0         | 1.93786346 | 0.595 | 0.18  | 0         | GABAergic | GRIN3A  |
| 0         | 1.90140507 | 0.516 | 0.204 | 0         | GABAergic | CNR1    |
| 0         | 1.86808245 | 0.897 | 0.68  | 0         | GABAergic | SGCZ    |
| 0         | 1.83687127 | 0.651 | 0.411 | 0         | GABAergic | FGF13   |
| 0         | 1.83650225 | 0.732 | 0.401 | 0         | GABAergic | FSTL5   |
| 0         | 1.81511792 | 0.953 | 0.497 | 0         | GABAergic | RPS6KA2 |
| 0         | 1.81409431 | 0.957 | 0.538 | 0         | GABAergic | GRIP1   |
| 0         | 1.79950831 | 0.907 | 0.4   | 0         | GABAergic | NETO2   |

|   |            |       |       |   |           |          |
|---|------------|-------|-------|---|-----------|----------|
| 0 | 1.79917681 | 0.678 | 0.174 | 0 | GABAergic | PLD5     |
| 0 | 1.74735912 | 0.989 | 0.648 | 0 | GABAergic | XKR4     |
| 0 | 1.71131104 | 0.858 | 0.312 | 0 | GABAergic | KCTD8    |
| 0 | 1.70023896 | 0.746 | 0.093 | 0 | GABAergic | ANK1     |
| 0 | 1.67968006 | 0.861 | 0.533 | 0 | GABAergic | TENM3    |
| 0 | 1.66865407 | 0.9   | 0.679 | 0 | GABAergic | GRID2    |
| 0 | 1.64505147 | 0.697 | 0.335 | 0 | GABAergic | ALK      |
| 0 | 1.63194551 | 0.461 | 0.114 | 0 | GABAergic | PDE3A    |
| 0 | 1.62851346 | 0.695 | 0.316 | 0 | GABAergic | KIAA1217 |
| 0 | 1.61031103 | 0.999 | 0.861 | 0 | GABAergic | GRIK2    |
| 0 | 1.60067119 | 0.711 | 0.311 | 0 | GABAergic | RGS12    |
| 0 | 1.56520872 | 0.712 | 0.164 | 0 | GABAergic | KCNIP1   |
| 0 | 1.55812819 | 0.673 | 0.138 | 0 | GABAergic | VWC2     |
| 0 | 1.53001038 | 0.994 | 0.854 | 0 | GABAergic | NRXN3    |
| 0 | 1.52319665 | 0.905 | 0.528 | 0 | GABAergic | CNTN5    |
| 0 | 1.50562283 | 0.909 | 0.43  | 0 | GABAergic | RAB3C    |
| 0 | 1.50233753 | 0.911 | 0.467 | 0 | GABAergic | ANO4     |
| 0 | 1.48644986 | 0.829 | 0.641 | 0 | GABAergic | UNC5D    |
| 0 | 1.48338333 | 0.816 | 0.187 | 0 | GABAergic | SLC6A1   |
| 0 | 1.46319353 | 0.757 | 0.27  | 0 | GABAergic | ELAVL2   |
| 0 | 1.46129805 | 0.988 | 0.769 | 0 | GABAergic | KAZN     |
| 0 | 1.454482   | 0.772 | 0.248 | 0 | GABAergic | RPH3A    |
| 0 | 1.45311941 | 0.651 | 0.037 | 0 | GABAergic | GRIP2    |
| 0 | 1.43963017 | 0.239 | 0.071 | 0 | GABAergic | SST      |
| 0 | 1.4388365  | 0.634 | 0.126 | 0 | GABAergic | OSBPL3   |
| 0 | 1.42141608 | 0.476 | 0.253 | 0 | GABAergic | IL1RAPL2 |
| 0 | 1.39876554 | 0.949 | 0.603 | 0 | GABAergic | MYRIP    |
| 0 | 1.39287618 | 0.836 | 0.435 | 0 | GABAergic | PEG3     |
| 0 | 1.39231323 | 0.998 | 0.803 | 0 | GABAergic | FGF12    |
| 0 | 1.37951817 | 0.574 | 0.334 | 0 | GABAergic | PTPRT    |
| 0 | 1.37366384 | 0.613 | 0.074 | 0 | GABAergic | IGF1     |
| 0 | 1.37247398 | 0.512 | 0.141 | 0 | GABAergic | GALNT14  |
| 0 | 1.36557616 | 0.819 | 0.329 | 0 | GABAergic | KIAA1211 |
| 0 | 1.34785844 | 0.546 | 0.214 | 0 | GABAergic | PLCXD3   |
| 0 | 1.33177186 | 0.532 | 0.281 | 0 | GABAergic | EYS      |
| 0 | 1.32368555 | 0.687 | 0.333 | 0 | GABAergic | TMEM132D |
| 0 | 1.32028472 | 0.513 | 0.249 | 0 | GABAergic | SDK1     |
| 0 | 1.31813206 | 0.665 | 0.45  | 0 | GABAergic | RASGRF2  |
| 0 | 1.26939103 | 0.238 | 0.099 | 0 | GABAergic | EYA4     |
| 0 | 1.26780494 | 0.826 | 0.407 | 0 | GABAergic | CNTN4    |
| 0 | 1.26463246 | 0.376 | 0.121 | 0 | GABAergic | STK32B   |

|   |            |       |       |   |           |          |
|---|------------|-------|-------|---|-----------|----------|
| 0 | 1.2522395  | 0.714 | 0.442 | 0 | GABAergic | ZMAT4    |
| 0 | 1.24124058 | 0.929 | 0.76  | 0 | GABAergic | OXR1     |
| 0 | 1.23445854 | 0.508 | 0.269 | 0 | GABAergic | GRM8     |
| 0 | 1.19635603 | 0.442 | 0.009 | 0 | GABAergic | LHX6     |
| 0 | 1.18536239 | 0.999 | 0.828 | 0 | GABAergic | FGF14    |
| 0 | 1.18418891 | 0.393 | 0.049 | 0 | GABAergic | BMP6     |
| 0 | 1.17499314 | 0.732 | 0.243 | 0 | GABAergic | SLC8A3   |
| 0 | 1.1674315  | 0.514 | 0.188 | 0 | GABAergic | EGFR     |
| 0 | 1.16162247 | 0.798 | 0.475 | 0 | GABAergic | GABRG3   |
| 0 | 1.16106812 | 0.68  | 0.173 | 0 | GABAergic | VAV2     |
| 0 | 1.15851389 | 0.623 | 0.424 | 0 | GABAergic | FBXL7    |
| 0 | 1.1546151  | 0.642 | 0.176 | 0 | GABAergic | VSTM2A   |
| 0 | 1.15020456 | 0.917 | 0.503 | 0 | GABAergic | THRB     |
| 0 | 1.14400898 | 0.772 | 0.347 | 0 | GABAergic | SYN3     |
| 0 | 1.14319353 | 0.793 | 0.364 | 0 | GABAergic | CIT      |
| 0 | 1.13441519 | 0.9   | 0.717 | 0 | GABAergic | ASIC2    |
| 0 | 1.13202782 | 0.906 | 0.543 | 0 | GABAergic | RIMBP2   |
| 0 | 1.13091705 | 0.936 | 0.598 | 0 | GABAergic | GABRB2   |
| 0 | 1.12861032 | 0.731 | 0.339 | 0 | GABAergic | ADCY8    |
| 0 | 1.12593139 | 0.485 | 0.282 | 0 | GABAergic | TRHDE    |
| 0 | 1.11462413 | 0.605 | 0.077 | 0 | GABAergic | ANKRD55  |
| 0 | 1.10949876 | 0.559 | 0.212 | 0 | GABAergic | TMEM132C |
| 0 | 1.10566023 | 0.355 | 0.089 | 0 | GABAergic | FBN2     |
| 0 | 1.09866536 | 0.787 | 0.462 | 0 | GABAergic | MTUS2    |
| 0 | 1.09154137 | 0.878 | 0.58  | 0 | GABAergic | CNTNAP5  |
| 0 | 1.09003871 | 0.863 | 0.554 | 0 | GABAergic | GNAS     |
| 0 | 1.08970771 | 0.623 | 0.237 | 0 | GABAergic | PIP5K1B  |
| 0 | 1.08885418 | 0.569 | 0.287 | 0 | GABAergic | FRAS1    |
| 0 | 1.07234887 | 0.32  | 0.069 | 0 | GABAergic | NOS1     |
| 0 | 1.07138635 | 0.654 | 0.24  | 0 | GABAergic | FMN1     |
| 0 | 1.06603547 | 0.824 | 0.541 | 0 | GABAergic | C8orf34  |
| 0 | 1.06346745 | 0.977 | 0.649 | 0 | GABAergic | ATP8A2   |
| 0 | 1.06295551 | 0.936 | 0.765 | 0 | GABAergic | ROBO1    |
| 0 | 1.06222744 | 0.683 | 0.254 | 0 | GABAergic | PDZRN3   |
| 0 | 1.06157523 | 0.43  | 0.07  | 0 | GABAergic | TOX3     |
| 0 | 1.04383719 | 0.679 | 0.298 | 0 | GABAergic | METAP1D  |
| 0 | 1.03259312 | 0.511 | 0.208 | 0 | GABAergic | SLC35F4  |
| 0 | 1.03222875 | 0.239 | 0.055 | 0 | GABAergic | SV2C     |
| 0 | 1.0276933  | 0.932 | 0.623 | 0 | GABAergic | ARNT2    |
| 0 | 1.02214429 | 0.986 | 0.628 | 0 | GABAergic | TMEM178B |
| 0 | 1.01845886 | 0.809 | 0.499 | 0 | GABAergic | SYNPR    |

|   |            |       |       |   |           |          |
|---|------------|-------|-------|---|-----------|----------|
| 0 | 1.00453601 | 0.771 | 0.49  | 0 | GABAergic | KCNAB1   |
| 0 | 1.00429192 | 0.976 | 0.661 | 0 | GABAergic | SPOCK3   |
| 0 | 0.9986247  | 0.991 | 0.839 | 0 | GABAergic | PDE4D    |
| 0 | 0.99767984 | 0.585 | 0.177 | 0 | GABAergic | 11-Mar   |
| 0 | 0.9874809  | 0.916 | 0.548 | 0 | GABAergic | MEF2C    |
| 0 | 0.98624467 | 0.596 | 0.23  | 0 | GABAergic | LRP8     |
| 0 | 0.97298383 | 0.801 | 0.434 | 0 | GABAergic | CLVS1    |
| 0 | 0.96389265 | 0.37  | 0.116 | 0 | GABAergic | PDE1C    |
| 0 | 0.95813067 | 0.51  | 0.146 | 0 | GABAergic | WLS      |
| 0 | 0.94807378 | 0.823 | 0.431 | 0 | GABAergic | SRRM4    |
| 0 | 0.94025211 | 0.465 | 0.08  | 0 | GABAergic | SIAH3    |
| 0 | 0.93751673 | 0.791 | 0.44  | 0 | GABAergic | 4-Mar    |
| 0 | 0.93657953 | 0.551 | 0.21  | 0 | GABAergic | FXVD6    |
| 0 | 0.93089658 | 0.643 | 0.25  | 0 | GABAergic | NRSN1    |
| 0 | 0.92749692 | 0.741 | 0.441 | 0 | GABAergic | LUZP2    |
| 0 | 0.92335419 | 0.449 | 0.135 | 0 | GABAergic | ST8SIA4  |
| 0 | 0.91274343 | 0.394 | 0.102 | 0 | GABAergic | ADAMTS6  |
| 0 | 0.91050439 | 0.636 | 0.386 | 0 | GABAergic | INPP4B   |
| 0 | 0.90779008 | 0.685 | 0.366 | 0 | GABAergic | GABRA1   |
| 0 | 0.90747757 | 0.605 | 0.246 | 0 | GABAergic | FRMD3    |
| 0 | 0.90740729 | 0.843 | 0.543 | 0 | GABAergic | ADCY2    |
| 0 | 0.90247711 | 0.617 | 0.2   | 0 | GABAergic | AFAP1    |
| 0 | 0.90205238 | 0.964 | 0.786 | 0 | GABAergic | DPP6     |
| 0 | 0.90070576 | 0.879 | 0.572 | 0 | GABAergic | ASTN2    |
| 0 | 0.89565061 | 0.299 | 0.067 | 0 | GABAergic | NXPH2    |
| 0 | 0.89451334 | 0.856 | 0.522 | 0 | GABAergic | PAM      |
| 0 | 0.89248942 | 0.261 | 0.134 | 0 | GABAergic | ADAMTSL1 |
| 0 | 0.8916446  | 0.655 | 0.418 | 0 | GABAergic | TENM1    |
| 0 | 0.89108184 | 0.762 | 0.512 | 0 | GABAergic | KIF26B   |
| 0 | 0.8680287  | 0.941 | 0.811 | 0 | GABAergic | DPP10    |
| 0 | 0.86317815 | 0.64  | 0.21  | 0 | GABAergic | RANBP17  |
| 0 | 0.85595621 | 0.815 | 0.503 | 0 | GABAergic | NYAP2    |
| 0 | 0.8543949  | 0.509 | 0.258 | 0 | GABAergic | CNTN6    |
| 0 | 0.84977395 | 0.518 | 0.183 | 0 | GABAergic | PRMT8    |
| 0 | 0.84954938 | 0.618 | 0.254 | 0 | GABAergic | ST8SIA5  |
| 0 | 0.84646076 | 0.573 | 0.218 | 0 | GABAergic | RBMS1    |
| 0 | 0.8451288  | 0.698 | 0.389 | 0 | GABAergic | L3MBTL4  |
| 0 | 0.8384051  | 0.659 | 0.35  | 0 | GABAergic | DGKD     |
| 0 | 0.83578491 | 0.914 | 0.701 | 0 | GABAergic | TMEM132B |
| 0 | 0.82430588 | 0.548 | 0.136 | 0 | GABAergic | NTN4     |
| 0 | 0.82381334 | 0.972 | 0.59  | 0 | GABAergic | CACNA1B  |

|   |            |       |       |   |              |            |
|---|------------|-------|-------|---|--------------|------------|
| 0 | 2.4781069  | 0.989 | 0.423 | 0 | Granule cell | CCDC85A    |
| 0 | 2.42327522 | 1     | 0.792 | 0 | Granule cell | PPFIA2     |
| 0 | 2.24817378 | 0.864 | 0.195 | 0 | Granule cell | ROR1       |
| 0 | 2.00059977 | 0.995 | 0.563 | 0 | Granule cell | CDH8       |
| 0 | 1.89662731 | 0.956 | 0.42  | 0 | Granule cell | SLIT3      |
| 0 | 1.87835047 | 0.984 | 0.386 | 0 | Granule cell | COL25A1    |
| 0 | 1.8264663  | 0.98  | 0.648 | 0 | Granule cell | RFX3       |
| 0 | 1.81611932 | 0.98  | 0.511 | 0 | Granule cell | TIAM1      |
| 0 | 1.72610677 | 0.971 | 0.419 | 0 | Granule cell | SPHKAP     |
| 0 | 1.70194347 | 0.988 | 0.476 | 0 | Granule cell | CNTN5      |
| 0 | 1.69816598 | 0.981 | 0.504 | 0 | Granule cell | GRM1       |
| 0 | 1.69745906 | 0.99  | 0.514 | 0 | Granule cell | PLXNA4     |
| 0 | 1.68894375 | 1     | 0.73  | 0 | Granule cell | RYR2       |
| 0 | 1.67910363 | 0.996 | 0.604 | 0 | Granule cell | ZFPM2      |
| 0 | 1.65852951 | 0.996 | 0.604 | 0 | Granule cell | ST6GALNAC5 |
| 0 | 1.64237062 | 0.997 | 0.552 | 0 | Granule cell | TRPM3      |
| 0 | 1.60066407 | 0.941 | 0.444 | 0 | Granule cell | SYNPR      |
| 0 | 1.58786597 | 0.997 | 0.725 | 0 | Granule cell | PARD3      |
| 0 | 1.58202333 | 0.952 | 0.467 | 0 | Granule cell | EPHA7      |
| 0 | 1.57057025 | 0.982 | 0.512 | 0 | Granule cell | KCNJ6      |
| 0 | 1.550026   | 0.996 | 0.634 | 0 | Granule cell | GABRB3     |
| 0 | 1.54570294 | 0.995 | 0.649 | 0 | Granule cell | DAB1       |
| 0 | 1.52013685 | 1     | 0.832 | 0 | Granule cell | STXBP5L    |
| 0 | 1.50342011 | 0.977 | 0.534 | 0 | Granule cell | DAPK1      |
| 0 | 1.50023509 | 0.981 | 0.536 | 0 | Granule cell | NELL1      |
| 0 | 1.4869434  | 0.853 | 0.291 | 0 | Granule cell | ARHGAP6    |
| 0 | 1.47982765 | 0.68  | 0.133 | 0 | Granule cell | GSG1L      |
| 0 | 1.46811484 | 0.91  | 0.448 | 0 | Granule cell | ELMOD1     |
| 0 | 1.45520869 | 0.973 | 0.484 | 0 | Granule cell | C8orf34    |
| 0 | 1.43782442 | 0.997 | 0.683 | 0 | Granule cell | KCTD16     |
| 0 | 1.42826478 | 0.929 | 0.373 | 0 | Granule cell | ZMAT4      |
| 0 | 1.41841464 | 0.891 | 0.322 | 0 | Granule cell | PDE7B      |
| 0 | 1.41825343 | 0.948 | 0.423 | 0 | Granule cell | UST        |
| 0 | 1.4150726  | 0.843 | 0.285 | 0 | Granule cell | THSD7B     |
| 0 | 1.41422845 | 1     | 0.962 | 0 | Granule cell | CADM2      |
| 0 | 1.40804729 | 0.873 | 0.354 | 0 | Granule cell | UNC13C     |
| 0 | 1.40557126 | 0.831 | 0.238 | 0 | Granule cell | ADRA1A     |
| 0 | 1.389573   | 0.996 | 0.611 | 0 | Granule cell | GALNT17    |
| 0 | 1.38728728 | 0.774 | 0.317 | 0 | Granule cell | LAMA3      |
| 0 | 1.38141627 | 0.799 | 0.234 | 0 | Granule cell | IL1RAP     |
| 0 | 1.36106679 | 0.985 | 0.551 | 0 | Granule cell | SPOCK1     |

|   |            |       |       |   |              |           |
|---|------------|-------|-------|---|--------------|-----------|
| 0 | 1.35335464 | 0.999 | 0.877 | 0 | Granule cell | NBEA      |
| 0 | 1.34718899 | 0.989 | 0.763 | 0 | Granule cell | ACAP2     |
| 0 | 1.3465406  | 0.997 | 0.838 | 0 | Granule cell | MYCBP2    |
| 0 | 1.33704441 | 0.883 | 0.411 | 0 | Granule cell | TBC1D1    |
| 0 | 1.33325132 | 0.985 | 0.598 | 0 | Granule cell | KCNH1     |
| 0 | 1.3282451  | 0.919 | 0.394 | 0 | Granule cell | KIAA1211L |
| 0 | 1.32411209 | 0.912 | 0.458 | 0 | Granule cell | KIF26B    |
| 0 | 1.32032413 | 0.988 | 0.619 | 0 | Granule cell | DPYD      |
| 0 | 1.31971459 | 0.854 | 0.359 | 0 | Granule cell | SMAD3     |
| 0 | 1.31314034 | 0.933 | 0.577 | 0 | Granule cell | KLHL2     |
| 0 | 1.30964271 | 0.905 | 0.434 | 0 | Granule cell | GRK3      |
| 0 | 1.30229311 | 0.992 | 0.62  | 0 | Granule cell | CACNA1E   |
| 0 | 1.30026134 | 0.876 | 0.386 | 0 | Granule cell | ADCY1     |
| 0 | 1.29881164 | 0.999 | 0.763 | 0 | Granule cell | ERC2      |
| 0 | 1.29680775 | 0.992 | 0.621 | 0 | Granule cell | GALNT18   |
| 0 | 1.29493827 | 0.929 | 0.459 | 0 | Granule cell | CDH9      |
| 0 | 1.29426722 | 0.701 | 0.188 | 0 | Granule cell | NPY1R     |
| 0 | 1.29212527 | 0.985 | 0.544 | 0 | Granule cell | SHISA9    |
| 0 | 1.28970994 | 0.995 | 0.587 | 0 | Granule cell | CLSTN2    |
| 0 | 1.28527961 | 1     | 0.915 | 0 | Granule cell | RBFOX1    |
| 0 | 1.27715894 | 0.999 | 0.894 | 0 | Granule cell | PPP3CA    |
| 0 | 1.27697547 | 0.992 | 0.631 | 0 | Granule cell | MCTP1     |
| 0 | 1.26862849 | 0.722 | 0.294 | 0 | Granule cell | SNED1     |
| 0 | 1.26267831 | 0.737 | 0.198 | 0 | Granule cell | PLEKHA2   |
| 0 | 1.24586009 | 0.974 | 0.56  | 0 | Granule cell | ZBTB20    |
| 0 | 1.22405074 | 0.734 | 0.235 | 0 | Granule cell | PCBP3     |
| 0 | 1.22179607 | 0.971 | 0.503 | 0 | Granule cell | SEMA5A    |
| 0 | 1.20651066 | 0.844 | 0.283 | 0 | Granule cell | CHST9     |
| 0 | 1.19058555 | 0.863 | 0.387 | 0 | Granule cell | MAN1C1    |
| 0 | 1.18424515 | 0.955 | 0.507 | 0 | Granule cell | PGBD5     |
| 0 | 1.18227427 | 0.921 | 0.52  | 0 | Granule cell | GRIN2A    |
| 0 | 1.1821451  | 0.962 | 0.498 | 0 | Granule cell | KLHL29    |
| 0 | 1.17883289 | 0.999 | 0.785 | 0 | Granule cell | KALRN     |
| 0 | 1.17630105 | 0.879 | 0.428 | 0 | Granule cell | GABRG3    |
| 0 | 1.17583115 | 0.973 | 0.465 | 0 | Granule cell | CA10      |
| 0 | 1.16710145 | 0.593 | 0.161 | 0 | Granule cell | BDNF      |
| 0 | 1.15999884 | 0.522 | 0.114 | 0 | Granule cell | C1QL3     |
| 0 | 1.15515478 | 0.971 | 0.633 | 0 | Granule cell | DIAPH2    |
| 0 | 1.15309825 | 0.999 | 0.775 | 0 | Granule cell | LRRC7     |
| 0 | 1.15237606 | 0.995 | 0.683 | 0 | Granule cell | CACNB2    |
| 0 | 1.14921077 | 0.999 | 0.842 | 0 | Granule cell | CSMD3     |



|   |            |       |       |   |              |          |
|---|------------|-------|-------|---|--------------|----------|
| 0 | 1.1424168  | 0.78  | 0.28  | 0 | Granule cell | SLC47A1  |
| 0 | 1.13971034 | 0.771 | 0.227 | 0 | Granule cell | BCL11B   |
| 0 | 1.12960569 | 0.872 | 0.445 | 0 | Granule cell | KIAA1549 |
| 0 | 1.1154573  | 0.449 | 0.067 | 0 | Granule cell | MALRD1   |
| 0 | 1.11151035 | 0.769 | 0.335 | 0 | Granule cell | BICC1    |
| 0 | 1.11073007 | 0.535 | 0.05  | 0 | Granule cell | TRPC6    |
| 0 | 1.10203534 | 0.922 | 0.455 | 0 | Granule cell | MAML3    |
| 0 | 1.10013488 | 0.955 | 0.566 | 0 | Granule cell | KCNJ3    |
| 0 | 1.09792303 | 0.573 | 0.104 | 0 | Granule cell | ADGRG2   |
| 0 | 1.0872484  | 0.994 | 0.687 | 0 | Granule cell | CAMK1D   |
| 0 | 1.08671922 | 0.814 | 0.317 | 0 | Granule cell | TANC1    |
| 0 | 1.07692287 | 0.975 | 0.561 | 0 | Granule cell | CAMK2A   |
| 0 | 1.07228165 | 0.989 | 0.627 | 0 | Granule cell | DGKG     |
| 0 | 1.05631811 | 0.892 | 0.535 | 0 | Granule cell | EML5     |
| 0 | 1.04208552 | 0.925 | 0.499 | 0 | Granule cell | CACNA1C  |
| 0 | 1.04042866 | 0.979 | 0.554 | 0 | Granule cell | GABBR2   |
| 0 | 1.03960283 | 0.998 | 0.701 | 0 | Granule cell | EPHA6    |
| 0 | 1.03768194 | 1     | 0.859 | 0 | Granule cell | KCNIP4   |
| 0 | 1.03705626 | 0.708 | 0.291 | 0 | Granule cell | PPM1E    |
| 0 | 1.03629822 | 0.902 | 0.468 | 0 | Granule cell | NECAB1   |
| 0 | 1.03272429 | 0.814 | 0.376 | 0 | Granule cell | NPTXR    |
| 0 | 1.03053248 | 0.929 | 0.518 | 0 | Granule cell | SUSD4    |
| 0 | 1.0271959  | 0.822 | 0.363 | 0 | Granule cell | DNAH9    |
| 0 | 1.02534069 | 0.878 | 0.498 | 0 | Granule cell | GFOD1    |
| 0 | 1.02289333 | 0.985 | 0.628 | 0 | Granule cell | FRMPD4   |
| 0 | 1.01760383 | 0.398 | 0.119 | 0 | Granule cell | LRRC3B   |
| 0 | 1.01758511 | 0.936 | 0.601 | 0 | Granule cell | CSNK1G1  |
| 0 | 0.99591249 | 0.989 | 0.684 | 0 | Granule cell | NTRK3    |
| 0 | 0.99295158 | 0.71  | 0.255 | 0 | Granule cell | FAT4     |
| 0 | 0.99194136 | 0.952 | 0.675 | 0 | Granule cell | CEP112   |
| 0 | 0.98708584 | 0.986 | 0.715 | 0 | Granule cell | CSMD2    |
| 0 | 0.98490833 | 1     | 0.909 | 0 | Granule cell | CSMD1    |
| 0 | 0.98403907 | 0.492 | 0.145 | 0 | Granule cell | ITGAE    |
| 0 | 0.98317105 | 0.678 | 0.285 | 0 | Granule cell | GABRA5   |
| 0 | 0.9799779  | 0.856 | 0.389 | 0 | Granule cell | PTK2B    |
| 0 | 0.97828522 | 0.998 | 0.752 | 0 | Granule cell | LRRTM4   |
| 0 | 0.97795148 | 0.601 | 0.123 | 0 | Granule cell | TSPAN18  |
| 0 | 0.97493662 | 0.967 | 0.599 | 0 | Granule cell | SORL1    |
| 0 | 0.96622908 | 0.578 | 0.199 | 0 | Granule cell | OPRD1    |
| 0 | 0.96303045 | 0.82  | 0.439 | 0 | Granule cell | CHCHD6   |
| 0 | 0.95445887 | 0.858 | 0.493 | 0 | Granule cell | MTMR7    |

|   |            |       |       |   |              |            |
|---|------------|-------|-------|---|--------------|------------|
| 0 | 0.92043408 | 0.602 | 0.536 | 0 | Granule cell | FAM155A    |
| 0 | 0.91758131 | 0.458 | 0.253 | 0 | Granule cell | ARHGAP44   |
| 0 | 0.91685119 | 0.925 | 0.544 | 0 | Granule cell | GABRA2     |
| 0 | 0.9168366  | 0.985 | 0.663 | 0 | Granule cell | CACNA2D1   |
| 0 | 0.9129993  | 0.632 | 0.133 | 0 | Granule cell | PROX1      |
| 0 | 0.90863335 | 0.773 | 0.393 | 0 | Granule cell | DPY19L3    |
| 0 | 0.90789833 | 0.857 | 0.463 | 0 | Granule cell | SCN3A      |
| 0 | 0.90590195 | 0.965 | 0.631 | 0 | Granule cell | NEBL       |
| 0 | 0.89749468 | 0.526 | 0.145 | 0 | Granule cell | NHSL2      |
| 0 | 0.8909609  | 0.999 | 0.745 | 0 | Granule cell | GRIA1      |
| 0 | 0.88623624 | 0.996 | 0.704 | 0 | Granule cell | GRIN2B     |
| 0 | 0.88574234 | 0.551 | 0.202 | 0 | Granule cell | RHBDL3     |
| 0 | 0.88166984 | 0.747 | 0.334 | 0 | Granule cell | ADAMTS3    |
| 0 | 0.88071317 | 0.935 | 0.572 | 0 | Granule cell | CACNA1D    |
| 0 | 0.8742687  | 0.603 | 0.337 | 0 | Granule cell | RBFOX3     |
| 0 | 0.86961312 | 0.482 | 0.404 | 0 | Granule cell | CELF2      |
| 0 | 0.86349767 | 0.818 | 0.399 | 0 | Granule cell | RASGRF2    |
| 0 | 0.8634128  | 0.987 | 0.758 | 0 | Granule cell | BTBD9      |
| 0 | 0.86337422 | 0.484 | 0.124 | 0 | Granule cell | LONRF3     |
| 0 | 0.86278849 | 0.979 | 0.639 | 0 | Granule cell | RAPGEF4    |
| 0 | 0.86175054 | 0.963 | 0.6   | 0 | Granule cell | KCNMA1     |
| 0 | 0.85887867 | 0.943 | 0.645 | 0 | Granule cell | NSF        |
| 0 | 0.8562097  | 0.984 | 0.753 | 0 | Granule cell | SIPA1L1    |
| 0 | 0.84471696 | 0.97  | 0.728 | 0 | Granule cell | TTC3       |
| 0 | 0.84172453 | 0.789 | 0.443 | 0 | Granule cell | CTDSPL     |
| 0 | 0.83275405 | 0.799 | 0.445 | 0 | Granule cell | GABRG2     |
| 0 | 0.82922888 | 0.999 | 0.787 | 0 | Granule cell | TENM2      |
| 0 | 3.80486149 | 0.915 | 0.198 | 0 | Microglia    | VAV3       |
| 0 | 3.79104274 | 0.876 | 0.047 | 0 | Microglia    | INPP5D     |
| 0 | 3.73187433 | 0.89  | 0.051 | 0 | Microglia    | APBB1IP    |
| 0 | 3.70595948 | 0.814 | 0.091 | 0 | Microglia    | ENTPD1     |
| 0 | 3.49272251 | 0.88  | 0.17  | 0 | Microglia    | ARHGAP15   |
| 0 | 3.35438702 | 0.983 | 0.621 | 0 | Microglia    | PLXDC2     |
| 0 | 3.21169711 | 0.816 | 0.029 | 0 | Microglia    | DOCK8      |
| 0 | 3.1356118  | 0.707 | 0.021 | 0 | Microglia    | A2M        |
| 0 | 3.05439118 | 0.81  | 0.079 | 0 | Microglia    | DOCK2      |
| 0 | 2.99547525 | 0.967 | 0.6   | 0 | Microglia    | ST6GALNAC3 |
| 0 | 2.87512966 | 0.788 | 0.336 | 0 | Microglia    | FKBP5      |
| 0 | 2.79014591 | 0.724 | 0.111 | 0 | Microglia    | MERTK      |
| 0 | 2.78402566 | 0.692 | 0.023 | 0 | Microglia    | SLCO2B1    |
| 0 | 2.76237333 | 0.781 | 0.392 | 0 | Microglia    | RTTN       |

|   |            |       |       |   |           |          |
|---|------------|-------|-------|---|-----------|----------|
| 0 | 2.74122043 | 0.643 | 0.018 | 0 | Microglia | CSF1R    |
| 0 | 2.73232075 | 0.617 | 0.056 | 0 | Microglia | ADAM28   |
| 0 | 2.70323139 | 0.665 | 0.029 | 0 | Microglia | FYB1     |
| 0 | 2.6648729  | 0.95  | 0.667 | 0 | Microglia | MEF2A    |
| 0 | 2.57831913 | 0.803 | 0.244 | 0 | Microglia | IPCEF1   |
| 0 | 2.51279843 | 0.627 | 0.09  | 0 | Microglia | ARHGAP24 |
| 0 | 2.50925139 | 0.93  | 0.549 | 0 | Microglia | ARHGAP22 |
| 0 | 2.48654427 | 0.595 | 0.018 | 0 | Microglia | MS4A7    |
| 0 | 2.4812295  | 0.726 | 0.163 | 0 | Microglia | FMNL3    |
| 0 | 2.46734982 | 0.613 | 0.176 | 0 | Microglia | FAM149A  |
| 0 | 2.45739752 | 0.642 | 0.025 | 0 | Microglia | FLI1     |
| 0 | 2.42443846 | 0.611 | 0.01  | 0 | Microglia | IKZF1    |
| 0 | 2.37548218 | 0.651 | 0.116 | 0 | Microglia | ATP8B4   |
| 0 | 2.37130143 | 0.64  | 0.06  | 0 | Microglia | PLCG2    |
| 0 | 2.36025427 | 0.548 | 0.042 | 0 | Microglia | TGFBR2   |
| 0 | 2.35274088 | 0.715 | 0.26  | 0 | Microglia | ABCC4    |
| 0 | 2.34472613 | 0.893 | 0.551 | 0 | Microglia | CAPZB    |
| 0 | 2.33769978 | 0.81  | 0.191 | 0 | Microglia | BNC2     |
| 0 | 2.32652674 | 0.76  | 0.291 | 0 | Microglia | AP1B1    |
| 0 | 2.31705971 | 0.551 | 0.032 | 0 | Microglia | GAB3     |
| 0 | 2.30596706 | 0.946 | 0.651 | 0 | Microglia | SORL1    |
| 0 | 2.30544351 | 0.347 | 0.02  | 0 | Microglia | PALD1    |
| 0 | 2.30535912 | 0.6   | 0.074 | 0 | Microglia | SCML4    |
| 0 | 2.30163984 | 0.618 | 0.086 | 0 | Microglia | RCSD1    |
| 0 | 2.29487842 | 0.918 | 0.547 | 0 | Microglia | FCHSD2   |
| 0 | 2.28111043 | 0.643 | 0.184 | 0 | Microglia | SKAP2    |
| 0 | 2.26820108 | 0.503 | 0.02  | 0 | Microglia | RUNX1    |
| 0 | 2.26120671 | 0.963 | 0.711 | 0 | Microglia | SLC9A9   |
| 0 | 2.25930508 | 0.58  | 0.046 | 0 | Microglia | BLNK     |
| 0 | 2.24372417 | 0.703 | 0.208 | 0 | Microglia | ZFHX3    |
| 0 | 2.21277484 | 0.515 | 0.023 | 0 | Microglia | PTPRC    |
| 0 | 2.20059509 | 0.557 | 0.011 | 0 | Microglia | BIN2     |
| 0 | 2.18555046 | 0.541 | 0.024 | 0 | Microglia | IFI16    |
| 0 | 2.16036016 | 0.606 | 0.121 | 0 | Microglia | RNASSET2 |
| 0 | 2.14666672 | 0.564 | 0.03  | 0 | Microglia | LYN      |
| 0 | 2.14573434 | 0.776 | 0.297 | 0 | Microglia | TMCC3    |
| 0 | 2.14268984 | 0.94  | 0.612 | 0 | Microglia | GAB2     |
| 0 | 2.1351715  | 0.438 | 0.011 | 0 | Microglia | MRC1     |
| 0 | 2.1299893  | 0.556 | 0.044 | 0 | Microglia | RBM47    |
| 0 | 2.12946419 | 0.506 | 0.019 | 0 | Microglia | TRIM22   |
| 0 | 2.12366841 | 0.598 | 0.117 | 0 | Microglia | TGFB1    |

|   |            |       |       |   |           |         |
|---|------------|-------|-------|---|-----------|---------|
| 0 | 2.1208297  | 0.548 | 0.032 | 0 | Microglia | AOAH    |
| 0 | 2.1174353  | 0.518 | 0.01  | 0 | Microglia | LCP2    |
| 0 | 2.10449406 | 0.462 | 0.008 | 0 | Microglia | MNDA    |
| 0 | 2.10439339 | 0.854 | 0.558 | 0 | Microglia | ABR     |
| 0 | 2.09703672 | 0.933 | 0.588 | 0 | Microglia | ASTN2   |
| 0 | 2.08037914 | 0.677 | 0.275 | 0 | Microglia | GUCY1A1 |
| 0 | 2.07361148 | 0.488 | 0.015 | 0 | Microglia | SLC2A5  |
| 0 | 2.06792281 | 0.614 | 0.143 | 0 | Microglia | TGFBR1  |
| 0 | 2.04950608 | 0.521 | 0.17  | 0 | Microglia | IFNGR1  |
| 0 | 2.03645263 | 0.519 | 0.012 | 0 | Microglia | WDFY4   |
| 0 | 2.03442776 | 0.503 | 0.019 | 0 | Microglia | ITGAM   |
| 0 | 2.02381722 | 0.728 | 0.341 | 0 | Microglia | DEPTOR  |
| 0 | 2.01126154 | 0.326 | 0.01  | 0 | Microglia | C1QC    |
| 0 | 2.00778964 | 0.495 | 0.015 | 0 | Microglia | TBXAS1  |
| 0 | 1.98984184 | 0.534 | 0.244 | 0 | Microglia | APOE    |
| 0 | 1.98342718 | 0.447 | 0.055 | 0 | Microglia | PLA2G4A |
| 0 | 1.98338638 | 0.506 | 0.024 | 0 | Microglia | RGS10   |
| 0 | 1.97936158 | 0.42  | 0.054 | 0 | Microglia | P2RY12  |
| 0 | 1.97645399 | 0.83  | 0.421 | 0 | Microglia | ANKRD44 |
| 0 | 1.97611599 | 0.493 | 0.051 | 0 | Microglia | PGM5    |
| 0 | 1.97338118 | 0.481 | 0.017 | 0 | Microglia | PIK3R5  |
| 0 | 1.96642879 | 0.716 | 0.347 | 0 | Microglia | SFMBT2  |
| 0 | 1.9630068  | 0.518 | 0.102 | 0 | Microglia | VWF     |
| 0 | 1.92068851 | 0.466 | 0.033 | 0 | Microglia | C3      |
| 0 | 1.91486051 | 0.421 | 0.009 | 0 | Microglia | CX3CR1  |
| 0 | 1.90857779 | 0.945 | 0.779 | 0 | Microglia | SNX29   |
| 0 | 1.90313567 | 0.307 | 0.011 | 0 | Microglia | C1QB    |
| 0 | 1.8903188  | 0.856 | 0.514 | 0 | Microglia | MTSS1   |
| 0 | 1.88858099 | 0.746 | 0.405 | 0 | Microglia | LRMDA   |
| 0 | 1.88766956 | 0.758 | 0.405 | 0 | Microglia | CTNND1  |
| 0 | 1.88674406 | 0.878 | 0.639 | 0 | Microglia | FOXN3   |
| 0 | 1.88306747 | 0.29  | 0.036 | 0 | Microglia | CD163   |
| 0 | 1.87894991 | 0.774 | 0.441 | 0 | Microglia | EPS15   |
| 0 | 1.87785764 | 0.811 | 0.311 | 0 | Microglia | PLD1    |
| 0 | 1.87614432 | 0.47  | 0.012 | 0 | Microglia | SYK     |
| 0 | 1.85936182 | 0.985 | 0.675 | 0 | Microglia | ELMO1   |
| 0 | 1.85935903 | 0.909 | 0.711 | 0 | Microglia | PICALM  |
| 0 | 1.83695701 | 0.393 | 0.012 | 0 | Microglia | AIM2    |
| 0 | 1.83155215 | 0.683 | 0.392 | 0 | Microglia | LRP11   |
| 0 | 1.82923757 | 0.608 | 0.267 | 0 | Microglia | IFNGR2  |
| 0 | 1.82578665 | 0.554 | 0.132 | 0 | Microglia | ITGB5   |

|   |            |       |       |   |           |          |
|---|------------|-------|-------|---|-----------|----------|
| 0 | 1.81844553 | 0.501 | 0.114 | 0 | Microglia | PRCP     |
| 0 | 1.8111538  | 0.441 | 0.025 | 0 | Microglia | PIK3AP1  |
| 0 | 1.79696443 | 0.632 | 0.322 | 0 | Microglia | SIPA1L2  |
| 0 | 1.79686524 | 0.687 | 0.418 | 0 | Microglia | PDE3B    |
| 0 | 1.78548024 | 0.672 | 0.275 | 0 | Microglia | ETV6     |
| 0 | 1.77299097 | 0.448 | 0.041 | 0 | Microglia | NFATC2   |
| 0 | 1.76043668 | 0.44  | 0.02  | 0 | Microglia | NCKAP1L  |
| 0 | 1.753479   | 0.881 | 0.431 | 0 | Microglia | ITPR2    |
| 0 | 1.74828536 | 0.446 | 0.015 | 0 | Microglia | PLCB2    |
| 0 | 1.74148309 | 0.403 | 0.008 | 0 | Microglia | LAPTM5   |
| 0 | 1.7365384  | 0.273 | 0.014 | 0 | Microglia | SLC11A1  |
| 0 | 1.71058492 | 0.416 | 0.009 | 0 | Microglia | FGD2     |
| 0 | 1.70766584 | 0.485 | 0.152 | 0 | Microglia | ST8SIA4  |
| 0 | 1.69947725 | 0.537 | 0.104 | 0 | Microglia | RUBCNL   |
| 0 | 1.69427535 | 0.846 | 0.596 | 0 | Microglia | LDLRAD4  |
| 0 | 1.69228256 | 0.827 | 0.362 | 0 | Microglia | PREX1    |
| 0 | 1.68924525 | 0.765 | 0.434 | 0 | Microglia | FGD4     |
| 0 | 1.67707076 | 0.354 | 0.09  | 0 | Microglia | DAB2     |
| 0 | 1.66568962 | 0.441 | 0.027 | 0 | Microglia | SP110    |
| 0 | 1.66177917 | 0.547 | 0.194 | 0 | Microglia | CYFIP1   |
| 0 | 1.65028198 | 0.636 | 0.321 | 0 | Microglia | PACSIN2  |
| 0 | 1.63764745 | 0.361 | 0.07  | 0 | Microglia | CLCN5    |
| 0 | 1.63688933 | 0.633 | 0.353 | 0 | Microglia | RUNX2    |
| 0 | 1.63548167 | 0.649 | 0.417 | 0 | Microglia | SMAP2    |
| 0 | 1.62946737 | 0.409 | 0.015 | 0 | Microglia | VAV1     |
| 0 | 1.62229848 | 0.593 | 0.423 | 0 | Microglia | SYNDIG1  |
| 0 | 1.62186503 | 0.463 | 0.081 | 0 | Microglia | SP100    |
| 0 | 1.61678302 | 0.771 | 0.44  | 0 | Microglia | MAN1A1   |
| 0 | 1.6149717  | 0.903 | 0.57  | 0 | Microglia | MEF2C    |
| 0 | 1.608768   | 0.385 | 0.015 | 0 | Microglia | HCK      |
| 0 | 1.59814694 | 0.903 | 0.674 | 0 | Microglia | EPB41L2  |
| 0 | 1.59537725 | 0.94  | 0.839 | 0 | Microglia | SSH2     |
| 0 | 1.59427401 | 0.427 | 0.072 | 0 | Microglia | LRRK1    |
| 0 | 1.5880394  | 0.377 | 0.091 | 0 | Microglia | THSD4    |
| 0 | 1.56925524 | 0.445 | 0.118 | 0 | Microglia | NRROS    |
| 0 | 1.554472   | 0.466 | 0.08  | 0 | Microglia | ZFP36L1  |
| 0 | 1.5479822  | 0.369 | 0.03  | 0 | Microglia | TNFRSF1B |
| 0 | 1.54216616 | 0.675 | 0.439 | 0 | Microglia | ARRB1    |
| 0 | 1.53926426 | 0.847 | 0.635 | 0 | Microglia | NAV3     |
| 0 | 1.53524496 | 0.935 | 0.849 | 0 | Microglia | MED13L   |
| 0 | 1.52902338 | 0.91  | 0.728 | 0 | Microglia | SH3RF3   |

|          |            |       |       |          |           |          |
|----------|------------|-------|-------|----------|-----------|----------|
| 0        | 1.52644948 | 0.779 | 0.554 | 0        | Microglia | LRCH1    |
| 0        | 1.52616047 | 0.497 | 0.191 | 0        | Microglia | DOCK11   |
| 0        | 1.52394565 | 0.471 | 0.228 | 0        | Microglia | LGMN     |
| 0        | 1.51038312 | 0.681 | 0.468 | 0        | Microglia | RAPGEF1  |
| 0        | 1.50955279 | 0.345 | 0.029 | 0        | Microglia | TMIGD3   |
| 0        | 1.50379075 | 0.357 | 0.023 | 0        | Microglia | VSIR     |
| 0        | 1.4969105  | 0.663 | 0.398 | 0        | Microglia | IKBKB    |
| 0        | 1.49653252 | 0.361 | 0.026 | 0        | Microglia | CMKLR1   |
| 0        | 1.4903107  | 0.75  | 0.624 | 0        | Microglia | ZSWIM6   |
| 0        | 1.48712386 | 0.728 | 0.53  | 0        | Microglia | ANKS1A   |
| 0        | 1.48375925 | 0.825 | 0.523 | 0        | Microglia | MAML3    |
| 0        | 1.48310972 | 0.917 | 0.711 | 0        | Microglia | KCNQ3    |
| 0        | 1.47882897 | 0.593 | 0.358 | 0        | Microglia | TBC1D4   |
| 4.12E-21 | 0.78785181 | 0.287 | 0.223 | 5.64E-17 | NN        | TMEM131L |
| 3.39E-22 | 0.79479672 | 0.266 | 0.197 | 4.64E-18 | NN        | RPS15    |
| 7.90E-28 | 0.86897619 | 0.373 | 0.313 | 1.08E-23 | NN        | RPL22    |
| 1.40E-30 | 0.77566893 | 0.256 | 0.167 | 1.91E-26 | NN        | PLCH1    |
| 6.90E-31 | 0.80991501 | 0.395 | 0.323 | 9.44E-27 | NN        | C4orf45  |
| 1.12E-37 | 0.81100434 | 0.293 | 0.197 | 1.54E-33 | NN        | HNRNPH3  |
| 1.01E-37 | 0.78128491 | 0.504 | 0.431 | 1.38E-33 | NN        | YWHAB    |
| 1.65E-38 | 0.90108732 | 0.264 | 0.168 | 2.25E-34 | NN        | ARRDC3   |
| 5.72E-41 | 0.8117575  | 0.325 | 0.218 | 7.82E-37 | NN        | ND3      |
| 2.60E-41 | 0.92335926 | 0.452 | 0.386 | 3.55E-37 | NN        | RIC3     |
| 2.57E-42 | 0.77744297 | 0.594 | 0.566 | 3.51E-38 | NN        | SPIN1    |
| 1.99E-42 | 0.91550113 | 0.301 | 0.199 | 2.73E-38 | NN        | KITLG    |
| 9.23E-43 | 0.9093506  | 0.462 | 0.394 | 1.26E-38 | NN        | CBLB     |
| 3.71E-43 | 0.80255913 | 0.423 | 0.318 | 5.08E-39 | NN        | ACACA    |
| 9.39E-44 | 0.79421275 | 0.54  | 0.495 | 1.28E-39 | NN        | XPR1     |
| 6.37E-45 | 0.83886966 | 0.561 | 0.527 | 8.71E-41 | NN        | UBE2E3   |
| 1.69E-45 | 0.94581504 | 0.295 | 0.189 | 2.31E-41 | NN        | RPL10    |
| 3.76E-46 | 0.80026184 | 0.451 | 0.346 | 5.14E-42 | NN        | PPIA     |
| 1.85E-46 | 0.91096138 | 0.411 | 0.309 | 2.54E-42 | NN        | LY6H     |
| 7.88E-47 | 0.79935201 | 0.517 | 0.456 | 1.08E-42 | NN        | SLC1A1   |
| 1.17E-48 | 0.79129593 | 0.565 | 0.497 | 1.60E-44 | NN        | UCHL1    |
| 1.19E-49 | 0.92388372 | 0.378 | 0.265 | 1.63E-45 | NN        | DCX      |
| 1.46E-52 | 0.85245756 | 0.518 | 0.413 | 1.99E-48 | NN        | YWHAH    |
| 6.49E-54 | 0.89942421 | 0.529 | 0.449 | 8.87E-50 | NN        | PUM2     |
| 8.46E-55 | 0.80083088 | 0.594 | 0.529 | 1.16E-50 | NN        | SCN3A    |
| 3.39E-57 | 0.82250636 | 0.516 | 0.384 | 4.64E-53 | NN        | TEAD1    |
| 3.14E-63 | 0.8173413  | 0.471 | 0.329 | 4.30E-59 | NN        | EPHB1    |
| 1.11E-63 | 0.93234413 | 0.272 | 0.141 | 1.51E-59 | NN        | ANTXR2   |

|           |            |       |       |           |    |           |
|-----------|------------|-------|-------|-----------|----|-----------|
| 2.67E-64  | 0.91066342 | 0.199 | 0.088 | 3.65E-60  | NN | AADAT     |
| 1.35E-64  | 0.89855833 | 0.439 | 0.296 | 1.84E-60  | NN | ND2       |
| 9.29E-65  | 1.08642107 | 0.334 | 0.202 | 1.27E-60  | NN | CBFA2T2   |
| 9.23E-65  | 0.88402068 | 0.334 | 0.19  | 1.26E-60  | NN | PCP4      |
| 2.79E-68  | 0.90587664 | 0.504 | 0.374 | 3.81E-64  | NN | KIAA1211  |
| 4.59E-69  | 0.85549494 | 0.665 | 0.614 | 6.28E-65  | NN | PCDHAC2   |
| 8.19E-70  | 1.19720862 | 0.818 | 0.719 | 1.12E-65  | NN | NRG1      |
| 2.70E-71  | 0.79819826 | 0.67  | 0.582 | 3.70E-67  | NN | SEMA5A    |
| 4.30E-72  | 0.84971837 | 0.705 | 0.658 | 5.89E-68  | NN | SYT14     |
| 2.08E-72  | 0.87121255 | 0.63  | 0.595 | 2.85E-68  | NN | EML5      |
| 1.84E-72  | 1.25173502 | 0.408 | 0.276 | 2.51E-68  | NN | VRK1      |
| 8.37E-75  | 0.99699565 | 0.615 | 0.511 | 1.14E-70  | NN | GALNTL6   |
| 8.24E-75  | 0.97856446 | 0.465 | 0.307 | 1.13E-70  | NN | UBB       |
| 1.78E-75  | 1.03680648 | 0.414 | 0.263 | 2.43E-71  | NN | RPL15     |
| 4.29E-77  | 1.04782167 | 0.355 | 0.205 | 5.86E-73  | NN | RPL4      |
| 5.05E-78  | 0.9910879  | 0.648 | 0.603 | 6.91E-74  | NN | CNOT2     |
| 1.99E-78  | 1.00800892 | 0.549 | 0.416 | 2.72E-74  | NN | SERINC1   |
| 1.16E-78  | 0.91445918 | 0.624 | 0.549 | 1.59E-74  | NN | ENOX1     |
| 8.82E-80  | 1.11740318 | 0.394 | 0.245 | 1.21E-75  | NN | NR2F1     |
| 3.54E-83  | 0.91761621 | 0.482 | 0.312 | 4.85E-79  | NN | ACTB      |
| 3.53E-83  | 1.12582069 | 0.492 | 0.35  | 4.83E-79  | NN | PALLD     |
| 1.29E-85  | 0.97371822 | 0.657 | 0.556 | 1.76E-81  | NN | CDH10     |
| 4.91E-86  | 0.83142589 | 0.238 | 0.099 | 6.71E-82  | NN | GCNT2     |
| 2.21E-86  | 0.91393552 | 0.451 | 0.27  | 3.02E-82  | NN | FGFR1     |
| 1.00E-87  | 0.7788194  | 0.188 | 0.068 | 1.37E-83  | NN | SLCO5A1   |
| 6.99E-91  | 0.99127123 | 0.559 | 0.402 | 9.56E-87  | NN | ADAMTS3   |
| 4.60E-91  | 1.04611951 | 0.237 | 0.099 | 6.30E-87  | NN | MDGA1     |
| 3.79E-91  | 0.91417027 | 0.315 | 0.146 | 5.19E-87  | NN | TLL1      |
| 1.78E-93  | 1.2465761  | 0.433 | 0.271 | 2.43E-89  | NN | GLRA2     |
| 2.80E-94  | 0.90882356 | 0.697 | 0.582 | 3.83E-90  | NN | GNAS      |
| 9.86E-97  | 1.17684012 | 0.548 | 0.411 | 1.35E-92  | NN | CTNNB1    |
| 8.04E-102 | 0.9691367  | 0.282 | 0.124 | 1.10E-97  | NN | ISLR2     |
| 5.95E-103 | 1.01584552 | 0.401 | 0.216 | 8.14E-99  | NN | C14orf132 |
| 1.51E-103 | 0.88119654 | 0.684 | 0.552 | 2.06E-99  | NN | PTPRO     |
| 9.64E-104 | 0.83654513 | 0.764 | 0.732 | 1.32E-99  | NN | PHF14     |
| 6.59E-104 | 0.90016464 | 0.726 | 0.585 | 9.01E-100 | NN | CALM2     |
| 7.44E-107 | 0.78335692 | 0.727 | 0.59  | 1.02E-102 | NN | KCNJ6     |
| 5.72E-109 | 1.15477571 | 0.353 | 0.176 | 7.83E-105 | NN | SEMA5B    |
| 1.50E-109 | 1.23164715 | 0.638 | 0.548 | 2.05E-105 | NN | EPHA7     |
| 4.51E-110 | 0.80784413 | 0.863 | 0.819 | 6.16E-106 | NN | MLLT3     |
| 2.93E-110 | 0.97906803 | 0.579 | 0.383 | 4.00E-106 | NN | RBM26     |

|           |            |       |       |           |    |         |
|-----------|------------|-------|-------|-----------|----|---------|
| 2.70E-110 | 1.19005876 | 0.57  | 0.414 | 3.70E-106 | NN | ASXL3   |
| 1.41E-110 | 0.91183772 | 0.577 | 0.371 | 1.93E-106 | NN | UBC     |
| 1.99E-111 | 1.03899991 | 0.608 | 0.462 | 2.72E-107 | NN | NSG2    |
| 6.48E-112 | 0.81914153 | 0.694 | 0.484 | 8.86E-108 | NN | MYO16   |
| 5.06E-112 | 1.08187534 | 0.225 | 0.079 | 6.92E-108 | NN | GLIS1   |
| 2.06E-112 | 1.19177719 | 0.572 | 0.419 | 2.81E-108 | NN | CCNH    |
| 2.05E-113 | 0.98339339 | 0.709 | 0.648 | 2.81E-109 | NN | 6-Mar   |
| 2.50E-114 | 0.81788681 | 0.775 | 0.648 | 3.42E-110 | NN | DOK6    |
| 8.09E-116 | 0.93647945 | 0.209 | 0.068 | 1.11E-111 | NN | EZR     |
| 7.84E-117 | 1.23153687 | 0.394 | 0.208 | 1.07E-112 | NN | GNG2    |
| 1.94E-118 | 0.85233513 | 0.487 | 0.267 | 2.65E-114 | NN | NHSL1   |
| 3.84E-123 | 1.09568737 | 0.506 | 0.287 | 5.25E-119 | NN | GAPDH   |
| 3.09E-126 | 0.89204389 | 0.678 | 0.484 | 4.22E-122 | NN | THSD7A  |
| 1.03E-126 | 1.07040761 | 0.708 | 0.56  | 1.41E-122 | NN | KLF12   |
| 5.16E-128 | 1.1982322  | 0.634 | 0.463 | 7.05E-124 | NN | IGF1R   |
| 7.92E-130 | 0.85772205 | 0.253 | 0.087 | 1.08E-125 | NN | NTF3    |
| 2.28E-130 | 0.86818204 | 0.665 | 0.448 | 3.11E-126 | NN | PCDH15  |
| 2.31E-134 | 1.43009149 | 0.46  | 0.262 | 3.16E-130 | NN | LRP8    |
| 4.68E-135 | 1.31060504 | 0.75  | 0.681 | 6.40E-131 | NN | DPYD    |
| 3.09E-139 | 1.1866681  | 0.546 | 0.33  | 4.22E-135 | NN | FAT4    |
| 5.92E-143 | 1.10088124 | 0.668 | 0.525 | 8.09E-139 | NN | ELMOD1  |
| 3.31E-143 | 1.08386789 | 0.855 | 0.743 | 4.53E-139 | NN | DGKB    |
| 2.64E-143 | 1.0504688  | 0.422 | 0.193 | 3.61E-139 | NN | ATP6    |
| 9.75E-145 | 1.07723565 | 0.747 | 0.614 | 1.33E-140 | NN | CHL1    |
| 7.74E-145 | 0.84667567 | 0.797 | 0.703 | 1.06E-140 | NN | RFX3    |
| 4.79E-145 | 1.40714137 | 0.636 | 0.45  | 6.55E-141 | NN | NRP1    |
| 1.99E-148 | 0.94417367 | 0.573 | 0.311 | 2.73E-144 | NN | ND1     |
| 6.24E-151 | 0.85698061 | 0.624 | 0.364 | 8.53E-147 | NN | CYTB    |
| 3.04E-151 | 1.01472224 | 0.715 | 0.54  | 4.16E-147 | NN | NECAB1  |
| 4.07E-158 | 1.00711022 | 0.772 | 0.709 | 5.56E-154 | NN | RASA1   |
| 4.34E-165 | 1.18417342 | 0.616 | 0.376 | 5.93E-161 | NN | STMN1   |
| 1.65E-165 | 1.36951357 | 0.54  | 0.309 | 2.25E-161 | NN | TUBB    |
| 1.13E-165 | 1.16410521 | 0.64  | 0.41  | 1.54E-161 | NN | PCSK5   |
| 1.57E-167 | 1.38433601 | 0.366 | 0.149 | 2.14E-163 | NN | SEMA3A  |
| 1.37E-167 | 1.3583838  | 0.738 | 0.569 | 1.87E-163 | NN | 1-Mar   |
| 7.21E-168 | 1.32485605 | 0.388 | 0.166 | 9.86E-164 | NN | DPYSL3  |
| 5.77E-168 | 0.96461937 | 0.814 | 0.561 | 7.89E-164 | NN | FRMD4B  |
| 8.90E-171 | 0.98945861 | 0.889 | 0.769 | 1.22E-166 | NN | NFIA    |
| 1.95E-173 | 1.25286706 | 0.685 | 0.501 | 2.66E-169 | NN | FNBP1L  |
| 7.18E-174 | 1.12540247 | 0.574 | 0.32  | 9.83E-170 | NN | NRP2    |
| 2.32E-178 | 1.15698029 | 0.729 | 0.517 | 3.17E-174 | NN | CCDC85A |



|           |            |       |       |           |              |          |
|-----------|------------|-------|-------|-----------|--------------|----------|
| 9.91E-179 | 0.84046867 | 0.882 | 0.734 | 1.36E-174 | NN           | NTRK3    |
| 3.31E-179 | 0.96221987 | 0.814 | 0.609 | 4.53E-175 | NN           | NELL1    |
| 3.48E-180 | 1.02331515 | 0.271 | 0.081 | 4.76E-176 | NN           | LYPD6    |
| 8.13E-182 | 0.82812248 | 0.896 | 0.653 | 1.11E-177 | NN           | CLSTN2   |
| 5.19E-192 | 1.55033816 | 0.687 | 0.492 | 7.10E-188 | NN           | PLXNA2   |
| 1.83E-197 | 1.33936157 | 0.659 | 0.416 | 2.50E-193 | NN           | ACTG1    |
| 4.53E-207 | 1.48142349 | 0.522 | 0.268 | 6.19E-203 | NN           | NREP     |
| 9.85E-208 | 1.132507   | 0.946 | 0.822 | 1.35E-203 | NN           | TENM2    |
| 8.22E-232 | 1.56079084 | 0.584 | 0.31  | 1.12E-227 | NN           | ZBTB18   |
| 3.70E-232 | 0.97015    | 0.917 | 0.741 | 5.05E-228 | NN           | PRKG1    |
| 2.47E-236 | 1.12080694 | 0.697 | 0.354 | 3.38E-232 | NN           | COX2     |
| 9.23E-237 | 1.29768517 | 0.75  | 0.439 | 1.26E-232 | NN           | FBXL7    |
| 1.23E-243 | 1.45309414 | 0.652 | 0.335 | 1.69E-239 | NN           | SETBP1   |
| 3.73E-244 | 1.04591748 | 0.865 | 0.628 | 5.10E-240 | NN           | ZBTB20   |
| 1.04E-247 | 0.96598576 | 0.242 | 0.052 | 1.42E-243 | NN           | SMO      |
| 6.41E-255 | 1.31276268 | 0.331 | 0.094 | 8.77E-251 | NN           | ST8SIA2  |
| 7.78E-268 | 1.27768707 | 0.596 | 0.247 | 1.06E-263 | NN           | ND4      |
| 4.75E-270 | 1.12787534 | 0.801 | 0.443 | 6.50E-266 | NN           | COX3     |
| 2.28E-271 | 1.61732778 | 0.711 | 0.431 | 3.12E-267 | NN           | FGF13    |
| 1.90E-272 | 0.83982347 | 0.195 | 0.033 | 2.60E-268 | NN           | PROKR2   |
| 8.54E-275 | 1.3858666  | 0.414 | 0.134 | 1.17E-270 | NN           | TUBB2B   |
| 3.00E-275 | 1.80886926 | 0.418 | 0.137 | 4.10E-271 | NN           | PDE1C    |
| 4.70E-277 | 1.48983831 | 0.863 | 0.716 | 6.43E-273 | NN           | CDH2     |
| 3.59E-294 | 1.15829603 | 0.869 | 0.601 | 4.90E-290 | NN           | PTPRZ1   |
| 7.37E-298 | 0.99001988 | 0.984 | 0.961 | 1.01E-293 | NN           | TCF4     |
| 1.68E-302 | 1.08719389 | 0.938 | 0.792 | 2.30E-298 | NN           | MAP2     |
| 0         | 2.82570285 | 0.678 | 0.14  | 0         | NN           | SEMA3C   |
| 0         | 2.08907134 | 0.714 | 0.329 | 0         | NN           | KCNH7    |
| 0         | 2.06294956 | 0.864 | 0.483 | 0         | NN           | COL25A1  |
| 0         | 1.93644306 | 0.595 | 0.242 | 0         | NN           | NNAT     |
| 0         | 1.90460633 | 0.731 | 0.387 | 0         | NN           | ABLIM3   |
| 0         | 1.90359785 | 0.945 | 0.667 | 0         | NN           | ZFPM2    |
| 0         | 1.84815162 | 0.613 | 0.214 | 0         | NN           | PROX1    |
| 0         | 1.71111072 | 0.887 | 0.662 | 0         | NN           | NFIB     |
| 0         | 1.68623956 | 0.841 | 0.508 | 0         | NN           | SLIT3    |
| 0         | 1.66060802 | 0.946 | 0.778 | 0         | NN           | TTC28    |
| 0         | 1.36867582 | 0.967 | 0.68  | 0         | NN           | NKAIN3   |
| 0         | 1.29069668 | 0.9   | 0.716 | 0         | NN           | CACNA2D1 |
| 0         | 1.20127283 | 0.98  | 0.874 | 0         | NN           | CCSER1   |
| 0         | 1.11101031 | 0.991 | 0.928 | 0         | NN           | DCC      |
| 0         | 5.2781412  | 0.992 | 0.579 | 0         | NSC/Astrocyt | SLC1A2   |

|   |            |       |       |   |              |          |
|---|------------|-------|-------|---|--------------|----------|
| 0 | 4.82767004 | 0.999 | 0.435 | 0 | NSC/Astrocyt | ADGRV1   |
| 0 | 3.95689224 | 0.979 | 0.251 | 0 | NSC/Astrocyt | SLC1A3   |
| 0 | 3.27547386 | 0.844 | 0.487 | 0 | NSC/Astrocyt | GPC5     |
| 0 | 3.23865955 | 0.843 | 0.058 | 0 | NSC/Astrocyt | GLI3     |
| 0 | 3.08477271 | 0.795 | 0.063 | 0 | NSC/Astrocyt | SLC25A18 |
| 0 | 3.0613074  | 0.757 | 0.087 | 0 | NSC/Astrocyt | RGS20    |
| 0 | 2.99619302 | 0.896 | 0.339 | 0 | NSC/Astrocyt | SPARCL1  |
| 0 | 2.98350573 | 0.864 | 0.236 | 0 | NSC/Astrocyt | PREX2    |
| 0 | 2.9473148  | 0.992 | 0.721 | 0 | NSC/Astrocyt | MSI2     |
| 0 | 2.88121464 | 0.557 | 0.076 | 0 | NSC/Astrocyt | GFAP     |
| 0 | 2.81106907 | 0.915 | 0.397 | 0 | NSC/Astrocyt | SLC4A4   |
| 0 | 2.76242878 | 0.557 | 0.058 | 0 | NSC/Astrocyt | ALDH1A1  |
| 0 | 2.75903202 | 0.68  | 0.024 | 0 | NSC/Astrocyt | ETNPPL   |
| 0 | 2.72485602 | 0.976 | 0.658 | 0 | NSC/Astrocyt | DTNA     |
| 0 | 2.71518976 | 0.998 | 0.843 | 0 | NSC/Astrocyt | GPM6A    |
| 0 | 2.71024318 | 0.641 | 0.216 | 0 | NSC/Astrocyt | APOE     |
| 0 | 2.69867176 | 0.766 | 0.094 | 0 | NSC/Astrocyt | GRAMD2B  |
| 0 | 2.67134119 | 0.743 | 0.222 | 0 | NSC/Astrocyt | NHSL1    |
| 0 | 2.66866929 | 0.813 | 0.123 | 0 | NSC/Astrocyt | ATP13A4  |
| 0 | 2.63135484 | 0.637 | 0.074 | 0 | NSC/Astrocyt | AQP4     |
| 0 | 2.61641521 | 0.619 | 0.04  | 0 | NSC/Astrocyt | ITGB4    |
| 0 | 2.5829534  | 0.796 | 0.277 | 0 | NSC/Astrocyt | RFX4     |
| 0 | 2.54189916 | 0.998 | 0.807 | 0 | NSC/Astrocyt | NTM      |
| 0 | 2.53942108 | 0.777 | 0.315 | 0 | NSC/Astrocyt | ZNRF3    |
| 0 | 2.50110043 | 0.513 | 0.025 | 0 | NSC/Astrocyt | TNC      |
| 0 | 2.44887258 | 0.861 | 0.349 | 0 | NSC/Astrocyt | CDH4     |
| 0 | 2.40510119 | 0.911 | 0.582 | 0 | NSC/Astrocyt | OPHN1    |
| 0 | 2.40199472 | 0.894 | 0.535 | 0 | NSC/Astrocyt | CARMIL1  |
| 0 | 2.3766529  | 0.799 | 0.263 | 0 | NSC/Astrocyt | LRIG1    |
| 0 | 2.35658373 | 0.992 | 0.88  | 0 | NSC/Astrocyt | TNIK     |
| 0 | 2.35658271 | 0.792 | 0.189 | 0 | NSC/Astrocyt | PLCE1    |
| 0 | 2.35373175 | 0.792 | 0.22  | 0 | NSC/Astrocyt | FGFR1    |
| 0 | 2.33509433 | 0.633 | 0.122 | 0 | NSC/Astrocyt | ANGPT1   |
| 0 | 2.33094717 | 0.838 | 0.381 | 0 | NSC/Astrocyt | SFXN5    |
| 0 | 2.32235959 | 0.826 | 0.444 | 0 | NSC/Astrocyt | MMD2     |
| 0 | 2.28782956 | 0.995 | 0.652 | 0 | NSC/Astrocyt | NKAIN3   |
| 0 | 2.27456578 | 0.991 | 0.844 | 0 | NSC/Astrocyt | NPAS3    |
| 0 | 2.22647071 | 0.685 | 0.123 | 0 | NSC/Astrocyt | SLC15A2  |
| 0 | 2.22490686 | 0.936 | 0.679 | 0 | NSC/Astrocyt | CPE      |
| 0 | 2.20777107 | 0.6   | 0.076 | 0 | NSC/Astrocyt | TCF7L1   |
| 0 | 2.20203859 | 0.73  | 0.291 | 0 | NSC/Astrocyt | EPHB1    |

|   |            |       |       |   |              |          |
|---|------------|-------|-------|---|--------------|----------|
| 0 | 2.20082251 | 0.835 | 0.644 | 0 | NSC/Astrocyt | NTRK2    |
| 0 | 2.19732682 | 0.545 | 0.016 | 0 | NSC/Astrocyt | ACSBG1   |
| 0 | 2.17513044 | 0.773 | 0.393 | 0 | NSC/Astrocyt | PDZRN4   |
| 0 | 2.17264911 | 0.813 | 0.461 | 0 | NSC/Astrocyt | ZHX3     |
| 0 | 2.17213999 | 0.897 | 0.55  | 0 | NSC/Astrocyt | ABLIM1   |
| 0 | 2.16365565 | 0.739 | 0.272 | 0 | NSC/Astrocyt | TPCN1    |
| 0 | 2.12994813 | 0.856 | 0.532 | 0 | NSC/Astrocyt | GABBR1   |
| 0 | 2.11081347 | 0.555 | 0.11  | 0 | NSC/Astrocyt | PAMR1    |
| 0 | 2.09479197 | 0.723 | 0.444 | 0 | NSC/Astrocyt | CLU      |
| 0 | 2.07998201 | 0.411 | 0.102 | 0 | NSC/Astrocyt | WIF1     |
| 0 | 2.06647654 | 0.554 | 0.04  | 0 | NSC/Astrocyt | MFGE8    |
| 0 | 2.05695564 | 0.953 | 0.681 | 0 | NSC/Astrocyt | SORBS1   |
| 0 | 2.04768788 | 0.528 | 0.03  | 0 | NSC/Astrocyt | LAMA1    |
| 0 | 2.03203266 | 0.5   | 0.076 | 0 | NSC/Astrocyt | BMPR1B   |
| 0 | 2.02674592 | 0.74  | 0.354 | 0 | NSC/Astrocyt | ANTXR1   |
| 0 | 2.02163942 | 0.894 | 0.693 | 0 | NSC/Astrocyt | ASB3     |
| 0 | 2.01801523 | 0.985 | 0.719 | 0 | NSC/Astrocyt | PRKG1    |
| 0 | 2.00665919 | 0.487 | 0.064 | 0 | NSC/Astrocyt | EFEMP1   |
| 0 | 1.98413216 | 0.523 | 0.032 | 0 | NSC/Astrocyt | MRVI1    |
| 0 | 1.97403462 | 0.604 | 0.142 | 0 | NSC/Astrocyt | FGD6     |
| 0 | 1.90513033 | 0.63  | 0.227 | 0 | NSC/Astrocyt | FADS2    |
| 0 | 1.89668419 | 0.537 | 0.097 | 0 | NSC/Astrocyt | GRAMD1C  |
| 0 | 1.87932929 | 0.799 | 0.465 | 0 | NSC/Astrocyt | CAMK2G   |
| 0 | 1.8518494  | 0.529 | 0.177 | 0 | NSC/Astrocyt | PHKA1    |
| 0 | 1.84628448 | 0.538 | 0.174 | 0 | NSC/Astrocyt | FAM107A  |
| 0 | 1.83392417 | 0.815 | 0.465 | 0 | NSC/Astrocyt | FARP1    |
| 0 | 1.83341411 | 0.57  | 0.182 | 0 | NSC/Astrocyt | TIMP3    |
| 0 | 1.82174613 | 0.516 | 0.068 | 0 | NSC/Astrocyt | ARHGEF26 |
| 0 | 1.81032263 | 0.899 | 0.566 | 0 | NSC/Astrocyt | SASH1    |
| 0 | 1.81025973 | 0.557 | 0.252 | 0 | NSC/Astrocyt | ANOS1    |
| 0 | 1.80863353 | 0.741 | 0.417 | 0 | NSC/Astrocyt | FGD4     |
| 0 | 1.80850569 | 0.598 | 0.222 | 0 | NSC/Astrocyt | STON2    |
| 0 | 1.80083949 | 0.439 | 0.064 | 0 | NSC/Astrocyt | COL5A3   |
| 0 | 1.79714609 | 0.728 | 0.266 | 0 | NSC/Astrocyt | ZFHX4    |
| 0 | 1.78985322 | 0.508 | 0.064 | 0 | NSC/Astrocyt | NDRG2    |
| 0 | 1.78984647 | 0.662 | 0.45  | 0 | NSC/Astrocyt | LUZP2    |
| 0 | 1.77443725 | 0.749 | 0.344 | 0 | NSC/Astrocyt | LHFPL6   |
| 0 | 1.76045311 | 0.969 | 0.751 | 0 | NSC/Astrocyt | NFIA     |
| 0 | 1.75655148 | 0.551 | 0.104 | 0 | NSC/Astrocyt | RORB     |
| 0 | 1.75504095 | 0.465 | 0.046 | 0 | NSC/Astrocyt | MYBPC1   |
| 0 | 1.75024    | 0.728 | 0.392 | 0 | NSC/Astrocyt | TTYH1    |

|   |            |       |       |   |              |           |
|---|------------|-------|-------|---|--------------|-----------|
| 0 | 1.74299431 | 0.75  | 0.379 | 0 | NSC/Astrocyt | PCSK5     |
| 0 | 1.73899869 | 0.406 | 0.057 | 0 | NSC/Astrocyt | SNTB1     |
| 0 | 1.72885033 | 0.366 | 0.013 | 0 | NSC/Astrocyt | FGFR3     |
| 0 | 1.72725213 | 0.764 | 0.35  | 0 | NSC/Astrocyt | TCF7L2    |
| 0 | 1.72008622 | 0.45  | 0.019 | 0 | NSC/Astrocyt | MLC1      |
| 0 | 1.71953184 | 0.615 | 0.329 | 0 | NSC/Astrocyt | OLFM2     |
| 0 | 1.71887291 | 0.847 | 0.402 | 0 | NSC/Astrocyt | FBXL7     |
| 0 | 1.71820139 | 0.472 | 0.077 | 0 | NSC/Astrocyt | COL5A1    |
| 0 | 1.71254857 | 0.702 | 0.21  | 0 | NSC/Astrocyt | ACACB     |
| 0 | 1.71239246 | 0.56  | 0.104 | 0 | NSC/Astrocyt | BCAN      |
| 0 | 1.70872749 | 0.866 | 0.818 | 0 | NSC/Astrocyt | DPP10     |
| 0 | 1.7073223  | 0.556 | 0.167 | 0 | NSC/Astrocyt | PLEKHA7   |
| 0 | 1.69808963 | 0.409 | 0.162 | 0 | NSC/Astrocyt | ALPK3     |
| 0 | 1.68009825 | 0.344 | 0.014 | 0 | NSC/Astrocyt | PRDM16    |
| 0 | 1.66505267 | 0.563 | 0.238 | 0 | NSC/Astrocyt | ARHGEF10L |
| 0 | 1.65055765 | 0.644 | 0.253 | 0 | NSC/Astrocyt | LIFR      |
| 0 | 1.64196414 | 0.856 | 0.468 | 0 | NSC/Astrocyt | SOX5      |
| 0 | 1.63706284 | 0.482 | 0.079 | 0 | NSC/Astrocyt | ARHGAP31  |
| 0 | 1.63352287 | 0.471 | 0.157 | 0 | NSC/Astrocyt | HOPX      |
| 0 | 1.63349487 | 0.557 | 0.299 | 0 | NSC/Astrocyt | NRP2      |
| 0 | 1.62867246 | 0.902 | 0.561 | 0 | NSC/Astrocyt | TRPS1     |
| 0 | 1.6215707  | 0.439 | 0.083 | 0 | NSC/Astrocyt | RGCC      |
| 0 | 1.6156536  | 0.579 | 0.152 | 0 | NSC/Astrocyt | KANK1     |
| 0 | 1.61411113 | 0.581 | 0.146 | 0 | NSC/Astrocyt | PDLIM5    |
| 0 | 1.61107451 | 0.572 | 0.307 | 0 | NSC/Astrocyt | CHPT1     |
| 0 | 1.60739369 | 0.654 | 0.284 | 0 | NSC/Astrocyt | CRB1      |
| 0 | 1.60403876 | 0.994 | 0.887 | 0 | NSC/Astrocyt | CTNND2    |
| 0 | 1.60372554 | 0.476 | 0.087 | 0 | NSC/Astrocyt | BMP7      |
| 0 | 1.6005535  | 0.343 | 0.026 | 0 | NSC/Astrocyt | ACBD7     |
| 0 | 1.59900093 | 0.517 | 0.241 | 0 | NSC/Astrocyt | SORCS2    |
| 0 | 1.59281052 | 0.459 | 0.062 | 0 | NSC/Astrocyt | ACSS1     |
| 0 | 1.59203507 | 0.859 | 0.422 | 0 | NSC/Astrocyt | GPC6      |
| 0 | 1.5839708  | 0.457 | 0.079 | 0 | NSC/Astrocyt | SLC7A11   |
| 0 | 1.58210246 | 0.601 | 0.339 | 0 | NSC/Astrocyt | SNTA1     |
| 0 | 1.57580981 | 0.535 | 0.093 | 0 | NSC/Astrocyt | MERTK     |
| 0 | 1.57072915 | 0.444 | 0.109 | 0 | NSC/Astrocyt | TPD52L1   |
| 0 | 1.56938688 | 0.401 | 0.19  | 0 | NSC/Astrocyt | SHROOM3   |
| 0 | 1.56867953 | 0.408 | 0.055 | 0 | NSC/Astrocyt | FAM189A2  |
| 0 | 1.56256504 | 0.712 | 0.464 | 0 | NSC/Astrocyt | RORA      |
| 0 | 1.55060979 | 0.491 | 0.193 | 0 | NSC/Astrocyt | BBS2      |
| 0 | 1.54956996 | 0.706 | 0.392 | 0 | NSC/Astrocyt | LPP       |

|   |            |       |       |   |              |          |
|---|------------|-------|-------|---|--------------|----------|
| 0 | 1.54954835 | 0.644 | 0.395 | 0 | NSC/Astrocyt | L3MBTL4  |
| 0 | 1.54937028 | 0.628 | 0.397 | 0 | NSC/Astrocyt | AHCYL1   |
| 0 | 1.54837895 | 0.753 | 0.568 | 0 | NSC/Astrocyt | RALGAPA2 |
| 0 | 1.54795303 | 0.716 | 0.358 | 0 | NSC/Astrocyt | FOXO1    |
| 0 | 1.542243   | 0.397 | 0.066 | 0 | NSC/Astrocyt | BOC      |
| 0 | 1.5404332  | 0.482 | 0.151 | 0 | NSC/Astrocyt | PHF21B   |
| 0 | 1.52766761 | 0.35  | 0.037 | 0 | NSC/Astrocyt | SLCO1C1  |
| 0 | 1.52442583 | 0.368 | 0.216 | 0 | NSC/Astrocyt | CST3     |
| 0 | 1.52392219 | 0.49  | 0.2   | 0 | NSC/Astrocyt | CNTFR    |
| 0 | 1.51562798 | 0.5   | 0.212 | 0 | NSC/Astrocyt | SDC2     |
| 0 | 1.51023686 | 0.364 | 0.019 | 0 | NSC/Astrocyt | BBOX1    |
| 0 | 1.50636889 | 0.376 | 0.078 | 0 | NSC/Astrocyt | LGI4     |
| 0 | 1.49282643 | 0.761 | 0.555 | 0 | NSC/Astrocyt | ACSL6    |
| 0 | 1.4812599  | 0.56  | 0.227 | 0 | NSC/Astrocyt | SPON1    |
| 0 | 1.47591853 | 0.415 | 0.13  | 0 | NSC/Astrocyt | GABRG1   |
| 0 | 1.47399254 | 0.465 | 0.146 | 0 | NSC/Astrocyt | NOTCH2   |
| 0 | 1.47261132 | 0.975 | 0.892 | 0 | NSC/Astrocyt | MACF1    |
| 0 | 1.46920388 | 0.685 | 0.485 | 0 | NSC/Astrocyt | PALM     |
| 0 | 1.46260228 | 0.355 | 0.01  | 0 | NSC/Astrocyt | SDC4     |
| 0 | 1.46233038 | 0.353 | 0.019 | 0 | NSC/Astrocyt | EDNRB    |
| 0 | 1.45927853 | 0.457 | 0.218 | 0 | NSC/Astrocyt | MAPK4    |
| 0 | 1.45329123 | 0.581 | 0.368 | 0 | NSC/Astrocyt | WWC1     |
| 0 | 1.44805685 | 0.573 | 0.295 | 0 | NSC/Astrocyt | CTNNA1   |
| 0 | 1.4360276  | 0.436 | 0.16  | 0 | NSC/Astrocyt | RAI14    |
| 0 | 1.42718133 | 0.323 | 0.015 | 0 | NSC/Astrocyt | AGT      |
| 0 | 1.42663742 | 0.306 | 0.052 | 0 | NSC/Astrocyt | LMNTD1   |
| 0 | 4.41536135 | 1     | 0.491 | 0 | Oligodendroc | MBP      |
| 0 | 4.11548981 | 0.954 | 0.429 | 0 | Oligodendroc | PLP1     |
| 0 | 4.01557575 | 0.985 | 0.264 | 0 | Oligodendroc | RNF220   |
| 0 | 3.55844936 | 0.806 | 0.13  | 0 | Oligodendroc | MOBP     |
| 0 | 3.38368701 | 0.907 | 0.107 | 0 | Oligodendroc | C10orf90 |
| 0 | 3.37976563 | 0.995 | 0.704 | 0 | Oligodendroc | CTNNA3   |
| 0 | 3.27035584 | 0.981 | 0.519 | 0 | Oligodendroc | PIP4K2A  |
| 0 | 3.12510181 | 0.877 | 0.108 | 0 | Oligodendroc | MOG      |
| 0 | 3.08265707 | 0.895 | 0.424 | 0 | Oligodendroc | QDPR     |
| 0 | 3.03146094 | 0.863 | 0.181 | 0 | Oligodendroc | ENPP2    |
| 0 | 2.98886559 | 0.749 | 0.09  | 0 | Oligodendroc | OPALIN   |
| 0 | 2.9880164  | 0.813 | 0.11  | 0 | Oligodendroc | MAG      |
| 0 | 2.9639338  | 0.981 | 0.541 | 0 | Oligodendroc | TMTC2    |
| 0 | 2.89784317 | 0.877 | 0.212 | 0 | Oligodendroc | ST18     |
| 0 | 2.89357444 | 0.989 | 0.598 | 0 | Oligodendroc | ELMO1    |

|   |            |       |       |   |             |            |
|---|------------|-------|-------|---|-------------|------------|
| 0 | 2.77750024 | 0.824 | 0.124 | 0 | Oligodendro | SHROOM4    |
| 0 | 2.75327904 | 0.814 | 0.174 | 0 | Oligodendro | FOLH1      |
| 0 | 2.75281853 | 0.937 | 0.604 | 0 | Oligodendro | PDE8A      |
| 0 | 2.74501378 | 0.861 | 0.267 | 0 | Oligodendro | PLEKHH1    |
| 0 | 2.73962668 | 0.98  | 0.739 | 0 | Oligodendro | SLC44A1    |
| 0 | 2.66438974 | 0.901 | 0.345 | 0 | Oligodendro | GAB1       |
| 0 | 2.66305069 | 0.785 | 0.3   | 0 | Oligodendro | KIF13B     |
| 0 | 2.6596799  | 0.974 | 0.724 | 0 | Oligodendro | PHLPP1     |
| 0 | 2.65792121 | 0.82  | 0.159 | 0 | Oligodendro | TTYH2      |
| 0 | 2.65426949 | 0.778 | 0.114 | 0 | Oligodendro | FA2H       |
| 0 | 2.61744235 | 0.761 | 0.122 | 0 | Oligodendro | DOCK5      |
| 0 | 2.58812421 | 0.894 | 0.482 | 0 | Oligodendro | ARAP2      |
| 0 | 2.57481892 | 0.663 | 0.073 | 0 | Oligodendro | ANLN       |
| 0 | 2.57014688 | 0.778 | 0.18  | 0 | Oligodendro | CLMN       |
| 0 | 2.56700936 | 0.689 | 0.182 | 0 | Oligodendro | HHIP       |
| 0 | 2.55321549 | 0.782 | 0.223 | 0 | Oligodendro | CNTN2      |
| 0 | 2.54156906 | 0.701 | 0.337 | 0 | Oligodendro | CLDN11     |
| 0 | 2.5363928  | 0.723 | 0.143 | 0 | Oligodendro | UGT8       |
| 0 | 2.52096846 | 0.755 | 0.205 | 0 | Oligodendro | TMC7       |
| 0 | 2.47704213 | 0.743 | 0.203 | 0 | Oligodendro | CREB5      |
| 0 | 2.46760461 | 0.742 | 0.12  | 0 | Oligodendro | ABCA8      |
| 0 | 2.46309455 | 0.881 | 0.596 | 0 | Oligodendro | MSANTD3-TM |
| 0 | 2.44966616 | 0.914 | 0.624 | 0 | Oligodendro | SLAIN1     |
| 0 | 2.43868702 | 0.978 | 0.735 | 0 | Oligodendro | PDE4B      |
| 0 | 2.4080794  | 0.932 | 0.601 | 0 | Oligodendro | PLCL1      |
| 0 | 2.39671459 | 0.971 | 0.79  | 0 | Oligodendro | SH3GL3     |
| 0 | 2.39506585 | 0.606 | 0.209 | 0 | Oligodendro | SLC5A11    |
| 0 | 2.38501586 | 0.683 | 0.119 | 0 | Oligodendro | PLLP       |
| 0 | 2.3661403  | 0.897 | 0.593 | 0 | Oligodendro | FRYL       |
| 0 | 2.34948563 | 0.629 | 0.111 | 0 | Oligodendro | ITGA2      |
| 0 | 2.32831302 | 0.439 | 0.042 | 0 | Oligodendro | ERMN       |
| 0 | 2.3138149  | 0.972 | 0.551 | 0 | Oligodendro | DOCK10     |
| 0 | 2.27024503 | 0.645 | 0.119 | 0 | Oligodendro | TF         |
| 0 | 2.256101   | 0.661 | 0.119 | 0 | Oligodendro | COL4A5     |
| 0 | 2.22568819 | 0.961 | 0.678 | 0 | Oligodendro | FNBP1      |
| 0 | 2.20455903 | 0.8   | 0.25  | 0 | Oligodendro | FGFR2      |
| 0 | 2.1907687  | 0.918 | 0.693 | 0 | Oligodendro | SHTN1      |
| 0 | 2.1807056  | 0.989 | 0.818 | 0 | Oligodendro | FRMD5      |
| 0 | 2.17826838 | 0.993 | 0.94  | 0 | Oligodendro | SIK3       |
| 0 | 2.16235934 | 0.969 | 0.753 | 0 | Oligodendro | SLC24A2    |
| 0 | 2.13699593 | 0.865 | 0.545 | 0 | Oligodendro | ERBIN      |

|   |            |       |       |   |             |          |
|---|------------|-------|-------|---|-------------|----------|
| 0 | 2.13023664 | 0.84  | 0.236 | 0 | Oligodendro | DAAM2    |
| 0 | 2.12998157 | 0.944 | 0.617 | 0 | Oligodendro | SPOCK3   |
| 0 | 2.12196576 | 0.8   | 0.455 | 0 | Oligodendro | SLC25A13 |
| 0 | 2.11016682 | 0.588 | 0.151 | 0 | Oligodendro | KCNH8    |
| 0 | 2.0971628  | 0.587 | 0.095 | 0 | Oligodendro | CLIC4    |
| 0 | 2.0970435  | 0.676 | 0.22  | 0 | Oligodendro | TESK2    |
| 0 | 2.08737958 | 0.785 | 0.608 | 0 | Oligodendro | ZDHHC20  |
| 0 | 2.07868519 | 0.907 | 0.558 | 0 | Oligodendro | USP54    |
| 0 | 2.05497512 | 0.36  | 0.099 | 0 | Oligodendro | CRYAB    |
| 0 | 2.04926563 | 0.768 | 0.418 | 0 | Oligodendro | HIPK2    |
| 0 | 2.04679991 | 0.724 | 0.15  | 0 | Oligodendro | BCAS1    |
| 0 | 2.04244146 | 0.611 | 0.401 | 0 | Oligodendro | DPYSL5   |
| 0 | 2.04164495 | 0.889 | 0.469 | 0 | Oligodendro | FRMD4B   |
| 0 | 2.04128366 | 0.54  | 0.1   | 0 | Oligodendro | RASGRP3  |
| 0 | 2.0410309  | 0.51  | 0.045 | 0 | Oligodendro | MAL      |
| 0 | 2.03913682 | 0.847 | 0.633 | 0 | Oligodendro | CDK19    |
| 0 | 2.0371381  | 0.885 | 0.733 | 0 | Oligodendro | FUT8     |
| 0 | 2.02846176 | 0.546 | 0.041 | 0 | Oligodendro | MYRF     |
| 0 | 1.99977547 | 0.735 | 0.534 | 0 | Oligodendro | MAN2A1   |
| 0 | 1.9790829  | 0.703 | 0.219 | 0 | Oligodendro | PLD1     |
| 0 | 1.95724158 | 0.877 | 0.71  | 0 | Oligodendro | TTLL7    |
| 0 | 1.94837618 | 0.577 | 0.25  | 0 | Oligodendro | RFFL     |
| 0 | 1.93523403 | 0.628 | 0.346 | 0 | Oligodendro | POLR2F   |
| 0 | 1.92013106 | 0.493 | 0.091 | 0 | Oligodendro | TMEM144  |
| 0 | 1.91969826 | 0.466 | 0.047 | 0 | Oligodendro | CPM      |
| 0 | 1.9191628  | 0.335 | 0.068 | 0 | Oligodendro | CNP      |
| 0 | 1.91678346 | 0.978 | 0.798 | 0 | Oligodendro | EDIL3    |
| 0 | 1.90882193 | 0.822 | 0.432 | 0 | Oligodendro | COBL     |
| 0 | 1.90514448 | 0.604 | 0.257 | 0 | Oligodendro | EPB41L4A |
| 0 | 1.90505005 | 0.578 | 0.212 | 0 | Oligodendro | NDRG1    |
| 0 | 1.90486157 | 0.608 | 0.256 | 0 | Oligodendro | ARHGAP23 |
| 0 | 1.89730797 | 0.509 | 0.1   | 0 | Oligodendro | LDB3     |
| 0 | 1.88435864 | 0.476 | 0.212 | 0 | Oligodendro | CLDND1   |
| 0 | 1.88305194 | 0.585 | 0.211 | 0 | Oligodendro | LPAR1    |
| 0 | 1.88094008 | 0.611 | 0.505 | 0 | Oligodendro | PRUNE2   |
| 0 | 1.87521274 | 0.937 | 0.701 | 0 | Oligodendro | GARNL3   |
| 0 | 1.8283748  | 0.98  | 0.846 | 0 | Oligodendro | DNM3     |
| 0 | 1.8091292  | 0.998 | 0.943 | 0 | Oligodendro | IL1RAPL1 |
| 0 | 1.80740072 | 0.595 | 0.242 | 0 | Oligodendro | MTUS1    |
| 0 | 1.79587408 | 0.417 | 0.398 | 0 | Oligodendro | DIP2B    |
| 0 | 1.79576663 | 0.496 | 0.2   | 0 | Oligodendro | GPR37    |

|   |            |       |       |   |             |            |
|---|------------|-------|-------|---|-------------|------------|
| 0 | 1.79274284 | 0.67  | 0.429 | 0 | Oligodendro | ATG4C      |
| 0 | 1.77659685 | 0.44  | 0.129 | 0 | Oligodendro | SPP1       |
| 0 | 1.75213979 | 0.517 | 0.089 | 0 | Oligodendro | PLEKHG3    |
| 0 | 1.7520105  | 0.894 | 0.531 | 0 | Oligodendro | ST6GALNAC3 |
| 0 | 1.73281201 | 0.957 | 0.861 | 0 | Oligodendro | TCF12      |
| 0 | 1.7258357  | 0.498 | 0.127 | 0 | Oligodendro | FAM124A    |
| 0 | 1.72374985 | 0.569 | 0.155 | 0 | Oligodendro | MYO1E      |
| 0 | 1.71867207 | 0.495 | 0.102 | 0 | Oligodendro | PLEKHB1    |
| 0 | 1.71298021 | 0.746 | 0.588 | 0 | Oligodendro | LPGAT1     |
| 0 | 1.71084942 | 0.982 | 0.89  | 0 | Oligodendro | PTPRD      |
| 0 | 1.69148756 | 0.954 | 0.862 | 0 | Oligodendro | RTN4       |
| 0 | 1.690979   | 0.741 | 0.551 | 0 | Oligodendro | PPP1R16B   |
| 0 | 1.68548681 | 0.909 | 0.579 | 0 | Oligodendro | CDH20      |
| 0 | 1.68318567 | 0.551 | 0.227 | 0 | Oligodendro | MITF       |
| 0 | 1.68310364 | 0.682 | 0.583 | 0 | Oligodendro | SAMD5      |
| 0 | 1.68152419 | 0.479 | 0.275 | 0 | Oligodendro | KLHL4      |
| 0 | 1.67544781 | 0.533 | 0.259 | 0 | Oligodendro | TMTC4      |
| 0 | 1.66619663 | 0.722 | 0.498 | 0 | Oligodendro | GRM3       |
| 0 | 1.66558851 | 0.818 | 0.685 | 0 | Oligodendro | CDK8       |
| 0 | 1.66382124 | 0.778 | 0.612 | 0 | Oligodendro | DENND5A    |
| 0 | 1.65570559 | 0.719 | 0.279 | 0 | Oligodendro | DOCK1      |
| 0 | 1.65462962 | 0.339 | 0.04  | 0 | Oligodendro | CNDP1      |
| 0 | 1.64849329 | 0.517 | 0.107 | 0 | Oligodendro | CDH19      |
| 0 | 1.63218647 | 0.982 | 0.867 | 0 | Oligodendro | ZEB2       |
| 0 | 1.62592459 | 0.743 | 0.574 | 0 | Oligodendro | ZFYVE16    |
| 0 | 1.60910504 | 0.984 | 0.951 | 0 | Oligodendro | PPP2R2B    |
| 0 | 1.60006598 | 0.592 | 0.389 | 0 | Oligodendro | RYBP       |
| 0 | 1.5925479  | 0.483 | 0.185 | 0 | Oligodendro | LRRC1      |
| 0 | 1.59032095 | 0.812 | 0.69  | 0 | Oligodendro | OSBPL1A    |
| 0 | 1.58956482 | 0.396 | 0.055 | 0 | Oligodendro | EFHD1      |
| 0 | 1.58313525 | 0.999 | 0.98  | 0 | Oligodendro | MAGI2      |
| 0 | 1.58093653 | 0.945 | 0.842 | 0 | Oligodendro | DLG1       |
| 0 | 1.58023973 | 0.456 | 0.142 | 0 | Oligodendro | BNC2       |
| 0 | 1.57477657 | 0.781 | 0.689 | 0 | Oligodendro | MAP4K5     |
| 0 | 1.56491695 | 0.602 | 0.414 | 0 | Oligodendro | RIF1       |
| 0 | 1.56270964 | 0.949 | 0.887 | 0 | Oligodendro | FMNL2      |
| 0 | 1.5621369  | 0.498 | 0.297 | 0 | Oligodendro | KIF6       |
| 0 | 1.56166226 | 0.428 | 0.177 | 0 | Oligodendro | SOX2       |
| 0 | 1.54660109 | 0.756 | 0.609 | 0 | Oligodendro | MYO1D      |
| 0 | 1.54159283 | 0.576 | 0.183 | 0 | Oligodendro | MEGF10     |
| 0 | 1.54121901 | 0.946 | 0.849 | 0 | Oligodendro | WWOX       |



|          |            |       |       |          |             |          |
|----------|------------|-------|-------|----------|-------------|----------|
| 0        | 1.51747651 | 0.313 | 0.132 | 0        | Oligodendro | GLUL     |
| 0        | 1.51433555 | 0.6   | 0.424 | 0        | Oligodendro | PSEN1    |
| 0        | 1.51029801 | 0.588 | 0.649 | 0        | Oligodendro | LARP4    |
| 0        | 1.50914766 | 0.318 | 0.1   | 0        | Oligodendro | SYT9     |
| 0        | 1.50831359 | 0.545 | 0.407 | 0        | Oligodendro | STMN4    |
| 0        | 1.50005681 | 0.454 | 0.314 | 0        | Oligodendro | LAMP2    |
| 0        | 1.49849819 | 0.382 | 0.04  | 0        | Oligodendro | SH3TC2   |
| 0        | 1.49734412 | 0.622 | 0.465 | 0        | Oligodendro | REEP3    |
| 0        | 1.49307788 | 0.636 | 0.498 | 0        | Oligodendro | PXK      |
| 0        | 1.48656878 | 0.616 | 0.422 | 0        | Oligodendro | ELL2     |
| 0        | 1.48580707 | 0.77  | 0.669 | 0        | Oligodendro | NAALADL2 |
| 0        | 1.48477127 | 0.469 | 0.167 | 0        | Oligodendro | CYP27A1  |
| 2.38E-81 | 1.33315396 | 0.548 | 0.536 | 3.25E-77 | OPC         | TMEM108  |
| 0        | 4.77669284 | 0.993 | 0.42  | 0        | OPC         | LHFPL3   |
| 0        | 3.62225274 | 0.968 | 0.214 | 0        | OPC         | SOX6     |
| 0        | 3.37882106 | 0.981 | 0.417 | 0        | OPC         | PCDH15   |
| 0        | 3.33322399 | 0.904 | 0.201 | 0        | OPC         | VCAN     |
| 0        | 3.08429793 | 0.992 | 0.58  | 0        | OPC         | PTPRZ1   |
| 0        | 2.81393719 | 0.909 | 0.177 | 0        | OPC         | COL9A1   |
| 0        | 2.80430755 | 0.99  | 0.64  | 0        | OPC         | XYLT1    |
| 0        | 2.75407745 | 0.963 | 0.521 | 0        | OPC         | TNR      |
| 0        | 2.72923509 | 0.719 | 0.032 | 0        | OPC         | STK32A   |
| 0        | 2.6623363  | 0.893 | 0.204 | 0        | OPC         | TMEM132C |
| 0        | 2.63991405 | 0.867 | 0.332 | 0        | OPC         | MEGF11   |
| 0        | 2.63331823 | 0.936 | 0.206 | 0        | OPC         | NXPH1    |
| 0        | 2.59538683 | 0.968 | 0.694 | 0        | OPC         | EPN2     |
| 0        | 2.5550879  | 0.945 | 0.535 | 0        | OPC         | KIF13A   |
| 0        | 2.51505465 | 0.972 | 0.577 | 0        | OPC         | SLC35F1  |
| 0        | 2.49751749 | 0.971 | 0.438 | 0        | OPC         | LUZP2    |
| 0        | 2.40682665 | 0.875 | 0.322 | 0        | OPC         | SULF2    |
| 0        | 2.3297154  | 0.948 | 0.667 | 0        | OPC         | NOVA1    |
| 0        | 2.28300777 | 0.466 | 0.302 | 0        | OPC         | CHST11   |
| 0        | 2.27839296 | 0.579 | 0.085 | 0        | OPC         | ADAM12   |
| 0        | 2.25034888 | 0.891 | 0.372 | 0        | OPC         | NTNG1    |
| 0        | 2.24513223 | 0.829 | 0.283 | 0        | OPC         | RIN2     |
| 0        | 2.21901846 | 0.975 | 0.678 | 0        | OPC         | MMP16    |
| 0        | 2.20982319 | 0.883 | 0.475 | 0        | OPC         | TNK2     |
| 0        | 2.17123117 | 0.809 | 0.351 | 0        | OPC         | CHST9    |
| 0        | 2.1571279  | 0.845 | 0.352 | 0        | OPC         | PDGFRA   |
| 0        | 2.14772872 | 0.609 | 0.031 | 0        | OPC         | AFAP1L2  |
| 0        | 2.13966564 | 0.955 | 0.526 | 0        | OPC         | CA10     |

|   |            |       |       |   |     |          |
|---|------------|-------|-------|---|-----|----------|
| 0 | 2.04625124 | 0.945 | 0.514 | 0 | OPC | HIP1     |
| 0 | 2.03719929 | 0.667 | 0.226 | 0 | OPC | MAP3K1   |
| 0 | 2.03677446 | 0.988 | 0.682 | 0 | OPC | GRID2    |
| 0 | 2.0159409  | 0.767 | 0.191 | 0 | OPC | SMOC1    |
| 0 | 1.99258808 | 0.545 | 0.048 | 0 | OPC | SLC22A3  |
| 0 | 1.96641037 | 0.898 | 0.531 | 0 | OPC | ZEB1     |
| 0 | 1.95734412 | 0.677 | 0.112 | 0 | OPC | BCAN     |
| 0 | 1.95602544 | 0.99  | 0.777 | 0 | OPC | KAZN     |
| 0 | 1.91684439 | 0.754 | 0.295 | 0 | OPC | DISC1    |
| 0 | 1.89676262 | 0.94  | 0.56  | 0 | OPC | SEMA5A   |
| 0 | 1.87667126 | 0.451 | 0.204 | 0 | OPC | BRINP3   |
| 0 | 1.87147904 | 0.556 | 0.112 | 0 | OPC | ADAMTS17 |
| 0 | 1.86681606 | 0.75  | 0.251 | 0 | OPC | BCAS1    |
| 0 | 1.84318533 | 0.699 | 0.191 | 0 | OPC | PLD5     |
| 0 | 1.83344157 | 0.682 | 0.186 | 0 | OPC | KCNIP1   |
| 0 | 1.81239348 | 0.76  | 0.364 | 0 | OPC | GRIA4    |
| 0 | 1.80113763 | 0.515 | 0.09  | 0 | OPC | CA8      |
| 0 | 1.76401388 | 0.956 | 0.666 | 0 | OPC | DSCAM    |
| 0 | 1.74815919 | 0.814 | 0.339 | 0 | OPC | KAT2B    |
| 0 | 1.72658491 | 0.915 | 0.653 | 0 | OPC | SCD5     |
| 0 | 1.71922378 | 0.629 | 0.208 | 0 | OPC | GALNT10  |
| 0 | 1.70663289 | 0.52  | 0.057 | 0 | OPC | LAMA4    |
| 0 | 1.70145278 | 0.708 | 0.16  | 0 | OPC | ZCCHC24  |
| 0 | 1.6977001  | 0.993 | 0.791 | 0 | OPC | DPP6     |
| 0 | 1.67633172 | 0.476 | 0.101 | 0 | OPC | CACNG4   |
| 0 | 1.67459908 | 0.441 | 0.048 | 0 | OPC | SUSD5    |
| 0 | 1.66707409 | 0.613 | 0.255 | 0 | OPC | ITGA9    |
| 0 | 1.65480065 | 0.561 | 0.18  | 0 | OPC | MYT1     |
| 0 | 1.65015068 | 0.421 | 0.031 | 0 | OPC | CALCRL   |
| 0 | 1.64588293 | 0.69  | 0.277 | 0 | OPC | TNS3     |
| 0 | 1.59675156 | 0.427 | 0.048 | 0 | OPC | ROR2     |
| 0 | 1.57980607 | 0.434 | 0.019 | 0 | OPC | C1QL1    |
| 0 | 1.57546976 | 0.841 | 0.492 | 0 | OPC | UST      |
| 0 | 1.56184204 | 0.969 | 0.736 | 0 | OPC | KCND2    |
| 0 | 1.53990709 | 0.607 | 0.337 | 0 | OPC | ST8SIA1  |
| 0 | 1.52720276 | 0.78  | 0.465 | 0 | OPC | MPPED2   |
| 0 | 1.52554992 | 0.988 | 0.907 | 0 | OPC | AGAP1    |
| 0 | 1.51918467 | 0.754 | 0.481 | 0 | OPC | SAMD4A   |
| 0 | 1.50448934 | 0.886 | 0.689 | 0 | OPC | NLGN4Y   |
| 0 | 1.49479721 | 0.583 | 0.196 | 0 | OPC | CCDC50   |
| 0 | 1.48872953 | 0.853 | 0.667 | 0 | OPC | CASK     |

|   |            |       |       |   |     |            |
|---|------------|-------|-------|---|-----|------------|
| 0 | 1.46330905 | 0.943 | 0.579 | 0 | OPC | ASTN2      |
| 0 | 1.46250693 | 0.488 | 0.128 | 0 | OPC | PLPP4      |
| 0 | 1.45475817 | 0.785 | 0.452 | 0 | OPC | COL11A1    |
| 0 | 1.45411867 | 0.82  | 0.545 | 0 | OPC | KLF12      |
| 0 | 1.44358343 | 0.626 | 0.173 | 0 | OPC | CDH19      |
| 0 | 1.44024164 | 0.79  | 0.512 | 0 | OPC | PID1       |
| 0 | 1.43586184 | 0.432 | 0.243 | 0 | OPC | BMPER      |
| 0 | 1.42462149 | 0.851 | 0.597 | 0 | OPC | OPHN1      |
| 0 | 1.42380076 | 0.873 | 0.684 | 0 | OPC | REV3L      |
| 0 | 1.42217027 | 0.74  | 0.5   | 0 | OPC | LRP1       |
| 0 | 1.42108186 | 0.738 | 0.473 | 0 | OPC | PHYHIP1    |
| 0 | 1.42020573 | 0.802 | 0.35  | 0 | OPC | SORCS1     |
| 0 | 1.39231934 | 0.961 | 0.684 | 0 | OPC | SGCZ       |
| 0 | 1.39107233 | 0.868 | 0.541 | 0 | OPC | FCHSD2     |
| 0 | 1.38421988 | 0.466 | 0.144 | 0 | OPC | WSCD1      |
| 0 | 1.38024418 | 0.362 | 0.005 | 0 | OPC | NKAIN4     |
| 0 | 1.3671856  | 0.937 | 0.672 | 0 | OPC | SGK1       |
| 0 | 1.36211323 | 0.503 | 0.232 | 0 | OPC | MAMLD1     |
| 0 | 1.35334843 | 0.942 | 0.777 | 0 | OPC | NRCAM      |
| 0 | 1.35242083 | 0.957 | 0.731 | 0 | OPC | MAML2      |
| 0 | 1.34963877 | 0.388 | 0.085 | 0 | OPC | GFRA1      |
| 0 | 1.34796958 | 0.861 | 0.599 | 0 | OPC | SH3D19     |
| 0 | 1.33960934 | 0.445 | 0.223 | 0 | OPC | ST6GAL1    |
| 0 | 1.33536375 | 0.601 | 0.16  | 0 | OPC | ATP13A4    |
| 0 | 1.33339069 | 0.45  | 0.092 | 0 | OPC | LRP4       |
| 0 | 1.32618465 | 0.575 | 0.161 | 0 | OPC | PDLIM5     |
| 0 | 1.31875515 | 0.477 | 0.219 | 0 | OPC | CSGALNACT1 |
| 0 | 1.3160888  | 0.388 | 0.075 | 0 | OPC | APOD       |
| 0 | 1.31606682 | 0.495 | 0.285 | 0 | OPC | PEAK1      |
| 0 | 1.31090214 | 0.627 | 0.446 | 0 | OPC | SLC1A1     |
| 0 | 1.30771859 | 0.906 | 0.682 | 0 | OPC | CACNA1A    |
| 0 | 1.29084385 | 0.568 | 0.373 | 0 | OPC | FAM184B    |
| 0 | 1.28947372 | 0.667 | 0.438 | 0 | OPC | GLCCI1     |
| 0 | 1.28262757 | 0.797 | 0.509 | 0 | OPC | MTSS1      |
| 0 | 1.28063274 | 0.303 | 0.027 | 0 | OPC | FERMT1     |
| 0 | 1.27112172 | 0.997 | 0.913 | 0 | OPC | LRP1B      |
| 0 | 1.25634026 | 0.524 | 0.249 | 0 | OPC | ETV1       |
| 0 | 1.25360412 | 0.643 | 0.439 | 0 | OPC | SEZ6L      |
| 0 | 1.24589151 | 0.382 | 0.11  | 0 | OPC | ANKRD55    |
| 0 | 1.23768349 | 0.424 | 0.17  | 0 | OPC | CSPG5      |
| 0 | 1.23541893 | 0.513 | 0.24  | 0 | OPC | SPATA6     |

|          |            |       |       |           |          |          |
|----------|------------|-------|-------|-----------|----------|----------|
| 0        | 1.23395093 | 0.382 | 0.066 | 0         | OPC      | TRAF4    |
| 0        | 1.22179182 | 0.618 | 0.478 | 0         | OPC      | FHIT     |
| 0        | 1.20852813 | 0.479 | 0.236 | 0         | OPC      | RANBP17  |
| 0        | 1.20746485 | 0.293 | 0.032 | 0         | OPC      | SPRY4    |
| 0        | 1.19800259 | 0.498 | 0.201 | 0         | OPC      | EGFR     |
| 0        | 1.17714741 | 0.969 | 0.793 | 0         | OPC      | ADGRL3   |
| 0        | 1.17549651 | 0.655 | 0.371 | 0         | OPC      | TCF7L2   |
| 0        | 1.16470204 | 0.8   | 0.51  | 0         | OPC      | ALCAM    |
| 0        | 1.1625696  | 0.891 | 0.618 | 0         | OPC      | KHDRBS3  |
| 0        | 1.15869277 | 0.644 | 0.437 | 0         | OPC      | PLPPR1   |
| 0        | 1.15810431 | 0.737 | 0.4   | 0         | OPC      | SORCS3   |
| 0        | 1.15377279 | 0.727 | 0.622 | 0         | OPC      | ZSWIM6   |
| 0        | 1.14988823 | 0.778 | 0.33  | 0         | OPC      | PTPRT    |
| 0        | 1.14384266 | 0.986 | 0.782 | 0         | OPC      | LRRTM4   |
| 0        | 1.13097311 | 0.386 | 0.22  | 0         | OPC      | CST3     |
| 0        | 1.11857524 | 0.429 | 0.227 | 0         | OPC      | AFAP1    |
| 0        | 1.11755812 | 0.542 | 0.317 | 0         | OPC      | IL1RAP   |
| 0        | 1.11640757 | 0.998 | 0.934 | 0         | OPC      | NLGN1    |
| 0        | 1.11182792 | 0.28  | 0.039 | 0         | OPC      | CCND1    |
| 0        | 1.10724233 | 0.829 | 0.483 | 0         | OPC      | SOX5     |
| 0        | 1.10701383 | 0.444 | 0.249 | 0         | OPC      | IGSF21   |
| 0        | 1.10627008 | 0.365 | 0.154 | 0         | OPC      | GALNT3   |
| 0        | 1.10594021 | 0.512 | 0.17  | 0         | OPC      | KANK1    |
| 0        | 1.0912026  | 0.274 | 0.106 | 0         | OPC      | VEGFA    |
| 0        | 1.08975414 | 0.37  | 0.076 | 0         | OPC      | CDC14A   |
| 0        | 1.08613134 | 0.502 | 0.365 | 0         | OPC      | ACAP3    |
| 0        | 1.07846231 | 0.698 | 0.328 | 0         | OPC      | CHD7     |
| 0        | 1.0750482  | 0.8   | 0.383 | 0         | OPC      | CDH13    |
| 0        | 1.06811658 | 0.569 | 0.224 | 0         | OPC      | PLCE1    |
| 0        | 1.06695252 | 0.981 | 0.849 | 0         | OPC      | NPAS3    |
| 0        | 1.06629017 | 0.409 | 0.258 | 0         | OPC      | ANGEL1   |
| 0        | 1.06543752 | 0.88  | 0.793 | 0         | OPC      | TNKS     |
| 0        | 1.05271083 | 0.503 | 0.368 | 0         | OPC      | TBC1D14  |
| 0        | 1.05253256 | 0.827 | 0.595 | 0         | OPC      | LRRTM3   |
| 0        | 1.04749106 | 0.476 | 0.286 | 0         | OPC      | BLM      |
| 0        | 1.04693429 | 0.255 | 0.034 | 0         | OPC      | NKD1     |
| 0        | 1.04575927 | 0.437 | 0.247 | 0         | OPC      | LIMA1    |
| 0        | 1.04445939 | 0.445 | 0.163 | 0         | OPC      | GPSM2    |
| 0        | 0.71852423 | 0.168 | 0.012 | 0         | OPC      | OLIG2    |
| 2.11E-07 | 1.46676047 | 0.401 | 0.419 | 0.0028875 | Pericyte | ADAMTSL3 |
| 8.20E-13 | 1.26758737 | 0.428 | 0.425 | 1.12E-08  | Pericyte | ADCY5    |

|          |            |       |       |          |          |          |
|----------|------------|-------|-------|----------|----------|----------|
| 7.38E-15 | 1.64252745 | 0.151 | 0.08  | 1.01E-10 | Pericyte | HTR1F    |
| 1.03E-17 | 1.38543133 | 0.33  | 0.251 | 1.41E-13 | Pericyte | SLC13A3  |
| 2.68E-20 | 1.39090477 | 0.461 | 0.435 | 3.66E-16 | Pericyte | CYTH3    |
| 1.32E-20 | 1.31369305 | 0.372 | 0.269 | 1.81E-16 | Pericyte | FLRT2    |
| 8.90E-21 | 1.25275928 | 0.428 | 0.366 | 1.22E-16 | Pericyte | SESN3    |
| 7.45E-22 | 2.47430164 | 0.384 | 0.291 | 1.02E-17 | Pericyte | GRM8     |
| 6.21E-22 | 1.25435768 | 0.438 | 0.366 | 8.50E-18 | Pericyte | SNED1    |
| 1.61E-27 | 1.33349442 | 0.487 | 0.446 | 2.21E-23 | Pericyte | KDM5A    |
| 6.97E-34 | 1.42647701 | 0.589 | 0.58  | 9.53E-30 | Pericyte | PTEN     |
| 2.63E-37 | 1.83967163 | 0.229 | 0.101 | 3.60E-33 | Pericyte | THSD4    |
| 3.13E-38 | 1.3060723  | 0.529 | 0.441 | 4.28E-34 | Pericyte | NBEAL1   |
| 2.54E-39 | 1.28386356 | 0.279 | 0.134 | 3.48E-35 | Pericyte | ITGA8    |
| 1.41E-39 | 1.64640301 | 0.75  | 0.627 | 1.92E-35 | Pericyte | TRPM3    |
| 1.72E-40 | 1.44663701 | 0.516 | 0.386 | 2.36E-36 | Pericyte | ARHGAP6  |
| 4.90E-43 | 1.43010162 | 0.18  | 0.063 | 6.71E-39 | Pericyte | TAGLN    |
| 1.05E-43 | 1.57177259 | 0.226 | 0.091 | 1.44E-39 | Pericyte | CDH6     |
| 9.83E-46 | 1.31787885 | 0.414 | 0.258 | 1.34E-41 | Pericyte | AKAP12   |
| 1.37E-46 | 1.26486977 | 0.512 | 0.394 | 1.87E-42 | Pericyte | CBLB     |
| 2.01E-48 | 1.27870365 | 0.153 | 0.044 | 2.76E-44 | Pericyte | TRPM1    |
| 1.25E-51 | 1.40778795 | 0.363 | 0.192 | 1.71E-47 | Pericyte | SPARC    |
| 8.38E-52 | 1.29005648 | 0.276 | 0.12  | 1.15E-47 | Pericyte | FRZB     |
| 3.10E-57 | 1.32791064 | 0.539 | 0.351 | 4.23E-53 | Pericyte | FKBP5    |
| 2.54E-57 | 1.59095268 | 0.202 | 0.065 | 3.48E-53 | Pericyte | ATP13A5  |
| 9.61E-60 | 1.78047625 | 0.447 | 0.262 | 1.31E-55 | Pericyte | FREM1    |
| 6.70E-60 | 1.45294244 | 0.383 | 0.199 | 9.17E-56 | Pericyte | ARHGAP28 |
| 1.46E-61 | 1.29613904 | 0.749 | 0.693 | 2.00E-57 | Pericyte | FOXP1    |
| 3.82E-64 | 1.58648811 | 0.614 | 0.418 | 5.22E-60 | Pericyte | PDE7B    |
| 6.53E-65 | 1.66729717 | 0.257 | 0.093 | 8.93E-61 | Pericyte | PLXDC1   |
| 1.62E-65 | 1.36929938 | 0.641 | 0.527 | 2.21E-61 | Pericyte | PPFIBP1  |
| 1.38E-65 | 1.65097317 | 0.366 | 0.162 | 1.89E-61 | Pericyte | NHS      |
| 1.16E-65 | 1.39632699 | 0.351 | 0.146 | 1.59E-61 | Pericyte | PDE3A    |
| 1.52E-71 | 1.35265915 | 0.641 | 0.486 | 2.07E-67 | Pericyte | RORA     |
| 4.24E-73 | 1.61395191 | 0.48  | 0.277 | 5.79E-69 | Pericyte | FRMD6    |
| 7.08E-74 | 1.39447951 | 0.679 | 0.528 | 9.69E-70 | Pericyte | PID1     |
| 8.34E-75 | 1.76821786 | 0.53  | 0.336 | 1.14E-70 | Pericyte | PHACTR2  |
| 2.34E-75 | 2.22713643 | 0.568 | 0.408 | 3.20E-71 | Pericyte | BICC1    |
| 1.58E-75 | 1.77193282 | 0.478 | 0.266 | 2.16E-71 | Pericyte | ARHGAP10 |
| 1.12E-76 | 1.53538048 | 0.655 | 0.527 | 1.54E-72 | Pericyte | SLC20A2  |
| 3.56E-78 | 1.40164425 | 0.383 | 0.158 | 4.87E-74 | Pericyte | FOXP2    |
| 2.31E-83 | 1.31697959 | 0.728 | 0.552 | 3.16E-79 | Pericyte | ZEB1     |
| 7.10E-84 | 2.18481758 | 0.435 | 0.199 | 9.71E-80 | Pericyte | EPS8     |

|           |            |       |       |           |          |          |
|-----------|------------|-------|-------|-----------|----------|----------|
| 3.72E-84  | 1.70610504 | 0.323 | 0.113 | 5.09E-80  | Pericyte | ADAM12   |
| 1.35E-90  | 1.47786134 | 0.311 | 0.101 | 1.85E-86  | Pericyte | EYA2     |
| 2.15E-91  | 1.25743208 | 0.201 | 0.045 | 2.94E-87  | Pericyte | A2M      |
| 6.41E-93  | 1.58394752 | 0.224 | 0.056 | 8.77E-89  | Pericyte | COL4A3   |
| 5.14E-95  | 2.14591692 | 0.36  | 0.129 | 7.02E-91  | Pericyte | COLEC12  |
| 4.62E-96  | 1.47271432 | 0.238 | 0.061 | 6.31E-92  | Pericyte | TRPC3    |
| 6.71E-99  | 1.44143172 | 0.651 | 0.419 | 9.18E-95  | Pericyte | LPP      |
| 1.33E-99  | 1.39178825 | 0.773 | 0.716 | 1.82E-95  | Pericyte | PCCA     |
| 2.54E-100 | 1.56606259 | 0.558 | 0.305 | 3.47E-96  | Pericyte | PTPN13   |
| 4.27E-104 | 1.58444878 | 0.397 | 0.154 | 5.84E-100 | Pericyte | PHLDB2   |
| 1.08E-106 | 1.49953554 | 0.45  | 0.182 | 1.47E-102 | Pericyte | FGD6     |
| 1.46E-110 | 1.27689592 | 0.746 | 0.446 | 1.99E-106 | Pericyte | ITPR2    |
| 1.66E-111 | 1.27325668 | 0.499 | 0.2   | 2.28E-107 | Pericyte | GSN      |
| 7.79E-115 | 1.55668275 | 0.449 | 0.167 | 1.07E-110 | Pericyte | ANGPT1   |
| 6.51E-120 | 1.28652807 | 0.356 | 0.107 | 8.90E-116 | Pericyte | TNS2     |
| 8.91E-126 | 1.45735064 | 0.342 | 0.098 | 1.22E-121 | Pericyte | DAB2     |
| 3.66E-126 | 1.76626958 | 0.337 | 0.092 | 5.00E-122 | Pericyte | APOD     |
| 9.70E-127 | 1.58031353 | 0.75  | 0.441 | 1.33E-122 | Pericyte | FBXL7    |
| 4.04E-127 | 1.57879158 | 0.447 | 0.157 | 5.53E-123 | Pericyte | EYA1     |
| 2.02E-130 | 1.71472753 | 0.376 | 0.117 | 2.77E-126 | Pericyte | COL12A1  |
| 2.37E-131 | 1.29147842 | 0.47  | 0.154 | 3.25E-127 | Pericyte | GRAMD2B  |
| 5.49E-132 | 1.59698429 | 0.447 | 0.158 | 7.51E-128 | Pericyte | SLC2A12  |
| 4.32E-133 | 2.94552728 | 0.302 | 0.077 | 5.91E-129 | Pericyte | SLC38A11 |
| 1.19E-136 | 2.52258448 | 0.387 | 0.122 | 1.63E-132 | Pericyte | KCNK2    |
| 2.37E-139 | 1.38571285 | 0.254 | 0.052 | 3.24E-135 | Pericyte | LAMC3    |
| 4.34E-140 | 1.50459553 | 0.724 | 0.39  | 5.93E-136 | Pericyte | PTPRM    |
| 2.85E-144 | 1.94421882 | 0.71  | 0.419 | 3.90E-140 | Pericyte | PLCB4    |
| 1.43E-144 | 4.07262475 | 0.526 | 0.231 | 1.96E-140 | Pericyte | CEMIP    |
| 2.72E-146 | 1.92293762 | 0.397 | 0.12  | 3.72E-142 | Pericyte | PROS1    |
| 2.26E-147 | 1.59866082 | 0.415 | 0.127 | 3.10E-143 | Pericyte | COL5A2   |
| 9.71E-154 | 1.3543844  | 0.432 | 0.122 | 1.33E-149 | Pericyte | TCF7L1   |
| 1.23E-154 | 1.43757608 | 0.248 | 0.046 | 1.68E-150 | Pericyte | NKD1     |
| 5.75E-156 | 2.43178504 | 0.39  | 0.11  | 7.87E-152 | Pericyte | COBLL1   |
| 8.40E-159 | 2.00510494 | 0.804 | 0.558 | 1.15E-154 | Pericyte | KCNT2    |
| 5.12E-162 | 1.86481278 | 0.586 | 0.25  | 7.00E-158 | Pericyte | RBMS1    |
| 6.10E-163 | 2.60055362 | 0.633 | 0.303 | 8.34E-159 | Pericyte | CALD1    |
| 2.12E-168 | 2.00017453 | 0.307 | 0.066 | 2.90E-164 | Pericyte | ADAMTS12 |
| 1.23E-179 | 1.99237821 | 0.519 | 0.171 | 1.68E-175 | Pericyte | ARHGAP42 |
| 4.23E-183 | 2.1524568  | 0.574 | 0.216 | 5.79E-179 | Pericyte | TIMP3    |
| 4.44E-184 | 1.87599996 | 0.502 | 0.161 | 6.07E-180 | Pericyte | MAP3K20  |
| 3.67E-186 | 2.78962071 | 0.511 | 0.163 | 5.01E-182 | Pericyte | PTGDS    |

|           |            |       |       |           |          |          |
|-----------|------------|-------|-------|-----------|----------|----------|
| 9.23E-193 | 1.72434443 | 0.386 | 0.087 | 1.26E-188 | Pericyte | SNTB1    |
| 4.02E-201 | 1.48277303 | 0.959 | 0.77  | 5.50E-197 | Pericyte | PARD3    |
| 6.64E-204 | 1.48613028 | 0.201 | 0.025 | 9.09E-200 | Pericyte | NOTCH3   |
| 1.70E-211 | 1.90914377 | 0.215 | 0.027 | 2.32E-207 | Pericyte | RGS5     |
| 2.90E-216 | 2.17656956 | 0.453 | 0.112 | 3.97E-212 | Pericyte | SLC7A11  |
| 3.80E-217 | 2.33662456 | 0.662 | 0.242 | 5.20E-213 | Pericyte | TMEM132C |
| 5.15E-232 | 1.42832252 | 0.306 | 0.049 | 7.04E-228 | Pericyte | TRIM5    |
| 3.63E-233 | 2.02675237 | 0.419 | 0.095 | 4.97E-229 | Pericyte | ABCA9    |
| 8.07E-235 | 1.53860001 | 0.283 | 0.042 | 1.10E-230 | Pericyte | ALDH1A2  |
| 9.90E-237 | 1.63917319 | 0.428 | 0.093 | 1.35E-232 | Pericyte | SP100    |
| 6.66E-249 | 2.49777294 | 0.676 | 0.244 | 9.11E-245 | Pericyte | SLC6A1   |
| 1.61E-249 | 1.8936388  | 0.54  | 0.138 | 2.21E-245 | Pericyte | PTN      |
| 4.20E-261 | 1.62630663 | 0.373 | 0.065 | 5.75E-257 | Pericyte | FBLN1    |
| 2.03E-263 | 1.49736339 | 0.352 | 0.059 | 2.77E-259 | Pericyte | DOCK6    |
| 1.26E-268 | 1.58502981 | 0.299 | 0.041 | 1.73E-264 | Pericyte | EPAS1    |
| 2.63E-277 | 1.27106739 | 0.241 | 0.027 | 3.60E-273 | Pericyte | COL6A2   |
| 8.55E-283 | 1.49394741 | 0.387 | 0.064 | 1.17E-278 | Pericyte | YAP1     |
| 7.74E-290 | 2.15956844 | 0.613 | 0.171 | 1.06E-285 | Pericyte | SYNE2    |
| 6.29E-295 | 2.5382849  | 0.843 | 0.378 | 8.60E-291 | Pericyte | LHFPL6   |
| 3.79E-297 | 2.60472382 | 0.689 | 0.216 | 5.19E-293 | Pericyte | UTRN     |
| 8.07E-304 | 2.66267158 | 0.523 | 0.12  | 1.10E-299 | Pericyte | MYO1B    |
| 0         | 5.00913172 | 0.79  | 0.07  | 0         | Pericyte | LAMA2    |
| 0         | 3.70909951 | 0.626 | 0.066 | 0         | Pericyte | EBF1     |
| 0         | 3.43789357 | 0.861 | 0.236 | 0         | Pericyte | RBMS3    |
| 0         | 3.40644492 | 0.652 | 0.012 | 0         | Pericyte | ITIH5    |
| 0         | 3.05992612 | 0.662 | 0.068 | 0         | Pericyte | RBPMS    |
| 0         | 2.97690213 | 0.408 | 0.005 | 0         | Pericyte | SLC6A20  |
| 0         | 2.88495452 | 0.453 | 0.079 | 0         | Pericyte | BMP6     |
| 0         | 2.86641121 | 0.724 | 0.134 | 0         | Pericyte | NID1     |
| 0         | 2.85948972 | 0.648 | 0.081 | 0         | Pericyte | LAMA4    |
| 0         | 2.74444518 | 0.489 | 0.071 | 0         | Pericyte | IGFBP7   |
| 0         | 2.54656945 | 0.612 | 0.067 | 0         | Pericyte | ARHGAP29 |
| 0         | 2.46604293 | 0.401 | 0.008 | 0         | Pericyte | C7       |
| 0         | 2.37503699 | 0.63  | 0.139 | 0         | Pericyte | UACA     |
| 0         | 2.32900161 | 0.456 | 0.017 | 0         | Pericyte | EGFLAM   |
| 0         | 2.28108991 | 0.445 | 0.012 | 0         | Pericyte | DCN      |
| 0         | 2.22608426 | 0.491 | 0.098 | 0         | Pericyte | TGFBR3   |
| 0         | 2.13232655 | 0.426 | 0.035 | 0         | Pericyte | MYOF     |
| 0         | 2.10206838 | 0.405 | 0.067 | 0         | Pericyte | FN1      |
| 0         | 2.09988171 | 0.506 | 0.082 | 0         | Pericyte | KANK2    |
| 0         | 2.04064668 | 0.351 | 0.024 | 0         | Pericyte | OGN      |

|   |            |       |       |   |          |         |
|---|------------|-------|-------|---|----------|---------|
| 0 | 2.02329258 | 0.457 | 0.07  | 0 | Pericyte | PDE5A   |
| 0 | 2.02067024 | 0.317 | 0.038 | 0 | Pericyte | SLC13A4 |
| 0 | 2.01775214 | 0.411 | 0.047 | 0 | Pericyte | CPED1   |
| 0 | 1.91650735 | 0.47  | 0.09  | 0 | Pericyte | TNS1    |
| 0 | 1.88457364 | 0.345 | 0.037 | 0 | Pericyte | PDGFRB  |
| 0 | 1.86373235 | 0.429 | 0.076 | 0 | Pericyte | NR2F2   |
| 0 | 1.82046588 | 0.318 | 0.003 | 0 | Pericyte | COL1A2  |
| 0 | 1.76153531 | 0.202 | 0.014 | 0 | Pericyte | ABCC9   |
| 0 | 1.75589362 | 0.3   | 0.023 | 0 | Pericyte | CPAMD8  |
| 0 | 1.75495602 | 0.303 | 0.02  | 0 | Pericyte | VIM     |
| 0 | 1.74677949 | 0.245 | 0.002 | 0 | Pericyte | IGF2    |
| 0 | 1.72005457 | 0.407 | 0.054 | 0 | Pericyte | DDR2    |
| 0 | 1.7057364  | 0.309 | 0.023 | 0 | Pericyte | ITGA1   |
| 0 | 1.62133935 | 0.353 | 0.05  | 0 | Pericyte | MRC2    |
| 0 | 1.5370604  | 0.273 | 0.014 | 0 | Pericyte | AOX1    |
| 0 | 1.53182243 | 0.332 | 0.034 | 0 | Pericyte | SVIL    |
| 0 | 1.51169691 | 0.386 | 0.059 | 0 | Pericyte | TGFBR2  |
| 0 | 1.47656848 | 0.251 | 0.011 | 0 | Pericyte | BMP5    |
| 0 | 1.47250142 | 0.167 | 0.006 | 0 | Pericyte | RERGL   |
| 0 | 1.40070369 | 0.283 | 0.004 | 0 | Pericyte | ZIC1    |
| 0 | 1.36547721 | 0.234 | 0.001 | 0 | Pericyte | COL3A1  |
| 0 | 1.35900951 | 0.314 | 0.038 | 0 | Pericyte | AHNAK   |
| 0 | 1.28302622 | 0.25  | 0.024 | 0 | Pericyte | COL18A1 |
| 0 | 1.25974531 | 0.23  | 0.018 | 0 | Pericyte | LEF1    |





















































































1EFF1
