# Supplementary material
Source: PubMed Central journal article supplement (PMC9343414)
Supplement: 41422_2022_678_MOESM17_ESM.pdf [file 41422_2022_678_MOESM17_ESM.pdf]

**Supplementary information****TableS3. Differentially expressed genes between Astrocyte from DG and CA**

| p_val     | avg_log2FC | pct.1 | pct.2 | p_val_adj | cluster | gene    |
|-----------|------------|-------|-------|-----------|---------|---------|
| 0         | 1.98881751 | 0.943 | 0.576 | 0         | DG      | PPFIA2  |
| 4.06E-306 | 1.69566289 | 0.585 | 0.163 | 5.55E-302 | DG      | CNTN5   |
| 2.46E-71  | 1.4205151  | 0.416 | 0.247 | 3.36E-67  | DG      | FAM155A |
| 3.71E-262 | 1.2161095  | 0.825 | 0.576 | 5.07E-258 | DG      | LRRTM4  |
| 4.94E-155 | 1.15966885 | 0.572 | 0.302 | 6.76E-151 | DG      | CDH8    |
| 4.44E-195 | 1.14884494 | 0.739 | 0.503 | 6.07E-191 | DG      | ERC2    |
| 7.60E-167 | 1.14196166 | 0.542 | 0.237 | 1.04E-162 | DG      | CCDC85A |
| 1.55E-298 | 1.14072379 | 0.888 | 0.701 | 2.12E-294 | DG      | CSMD3   |
| 3.63E-157 | 1.13715164 | 0.558 | 0.291 | 4.96E-153 | DG      | COL25A1 |
| 1.07E-264 | 1.13318389 | 0.84  | 0.605 | 1.46E-260 | DG      | ZFPM2   |
| 1.03E-127 | 1.09942817 | 0.439 | 0.191 | 1.40E-123 | DG      | CDH9    |
| 3.35E-253 | 1.0516855  | 0.885 | 0.745 | 4.58E-249 | DG      | GRIK2   |
| 3.40E-120 | 1.0316075  | 0.476 | 0.237 | 4.64E-116 | DG      | GRM1    |
| 2.05E-119 | 0.99683293 | 0.608 | 0.403 | 2.80E-115 | DG      | CLSTN2  |
| 1.75E-135 | 0.99608776 | 0.646 | 0.435 | 2.40E-131 | DG      | SGCZ    |
| 1.72E-102 | 0.98464352 | 0.365 | 0.149 | 2.35E-98  | DG      | CA10    |
| 9.76E-202 | 0.93984562 | 0.959 | 0.941 | 1.34E-197 | DG      | CSMD1   |
| 2.51E-96  | 0.93473254 | 0.413 | 0.2   | 3.43E-92  | DG      | C8orf34 |
| 5.19E-92  | 0.9264275  | 0.312 | 0.113 | 7.10E-88  | DG      | UNC13C  |
| 6.57E-191 | 0.92093276 | 0.857 | 0.69  | 8.99E-187 | DG      | RYR2    |
| 7.02E-109 | 0.9103765  | 0.57  | 0.366 | 9.60E-105 | DG      | TMEFF2  |
| 6.20E-84  | 0.89372731 | 0.402 | 0.208 | 8.48E-80  | DG      | SYNPR   |
| 3.10E-108 | 0.89339185 | 0.602 | 0.4   | 4.24E-104 | DG      | DPYD    |
| 1.64E-203 | 0.88693908 | 0.904 | 0.778 | 2.24E-199 | DG      | EPHA6   |
| 3.57E-90  | 0.88079245 | 0.417 | 0.21  | 4.88E-86  | DG      | EPHA7   |
| 3.47E-88  | 0.85873786 | 0.402 | 0.192 | 4.75E-84  | DG      | SEMA5A  |
| 7.72E-94  | 0.8566942  | 0.937 | 0.852 | 1.06E-89  | DG      | DPP10   |
| 3.30E-76  | 0.84596565 | 0.505 | 0.334 | 4.52E-72  | DG      | GABRB3  |
| 9.82E-222 | 0.83486979 | 0.971 | 0.856 | 1.34E-217 | DG      | KCNIP4  |
| 5.43E-84  | 0.82162822 | 0.504 | 0.311 | 7.43E-80  | DG      | KCNT2   |
| 5.75E-110 | 0.79627439 | 0.736 | 0.582 | 7.87E-106 | DG      | KCTD16  |
| 1.81E-58  | 0.7959184  | 0.31  | 0.155 | 2.48E-54  | DG      | KCNJ6   |
| 2.53E-69  | 0.79389694 | 0.282 | 0.112 | 3.46E-65  | DG      | PDE7B   |
| 3.46E-74  | 0.78689992 | 0.475 | 0.281 | 4.73E-70  | DG      | PCDH15  |
| 7.87E-65  | 0.78538009 | 0.434 | 0.267 | 1.08E-60  | DG      | PRR16   |
| 9.83E-83  | 0.7753563  | 0.607 | 0.449 | 1.34E-78  | DG      | MCTP1   |
| 3.13E-180 | 0.76748083 | 0.907 | 0.811 | 4.28E-176 | DG      | NBEA    |
| 1.40E-62  | 0.76676584 | 0.282 | 0.124 | 1.91E-58  | DG      | ELMOD1  |

|           |            |       |       |           |    |          |
|-----------|------------|-------|-------|-----------|----|----------|
| 1.44E-66  | 0.76515605 | 0.437 | 0.274 | 1.98E-62  | DG | TIAM1    |
| 1.81E-67  | 0.75506414 | 0.22  | 0.069 | 2.48E-63  | DG | THSD7B   |
| 8.02E-56  | 0.74883558 | 0.421 | 0.265 | 1.10E-51  | DG | UST      |
| 1.39E-57  | 0.74520218 | 0.295 | 0.142 | 1.90E-53  | DG | MAML3    |
| 2.51E-72  | 0.73820221 | 0.571 | 0.414 | 3.43E-68  | DG | GALNT17  |
| 2.29E-61  | 0.73491054 | 0.482 | 0.324 | 3.13E-57  | DG | SPOCK1   |
| 3.65E-77  | 0.73099236 | 0.623 | 0.488 | 4.99E-73  | DG | EDIL3    |
| 4.14E-96  | 0.71769606 | 0.7   | 0.57  | 5.67E-92  | DG | RFX3     |
| 2.47E-75  | 0.71452855 | 0.683 | 0.561 | 3.38E-71  | DG | DPP6     |
| 3.34E-60  | 0.71135377 | 0.274 | 0.119 | 4.57E-56  | DG | ZMAT4    |
| 1.49E-52  | 0.7102834  | 0.267 | 0.125 | 2.04E-48  | DG | ADAMTS3  |
| 1.49E-69  | 0.69892543 | 0.58  | 0.426 | 2.03E-65  | DG | KCNH1    |
| 0         | 1.86356776 | 0.72  | 0.196 | 0         | CA | PLP1     |
| 0         | 1.5489399  | 0.714 | 0.201 | 0         | CA | MEIS2    |
| 1.32E-131 | 0.97746789 | 0.453 | 0.177 | 1.81E-127 | CA | PLCB4    |
| 8.86E-100 | 0.90439981 | 0.492 | 0.238 | 1.21E-95  | CA | TRIM58   |
| 1.19E-97  | 0.82956651 | 0.936 | 0.846 | 1.63E-93  | CA | SLC24A3  |
| 1.02E-68  | 0.7387836  | 0.477 | 0.264 | 1.39E-64  | CA | MYO16    |
| 8.64E-133 | 0.71246068 | 0.926 | 0.776 | 1.18E-128 | CA | MAPK10   |
| 5.15E-102 | 0.70576172 | 0.777 | 0.517 | 7.04E-98  | CA | PEX5L    |
| 1.08E-74  | 0.6531056  | 0.312 | 0.122 | 1.48E-70  | CA | FIGN     |
| 5.60E-88  | 0.64517814 | 0.299 | 0.102 | 7.67E-84  | CA | MEIS1    |
| 2.47E-63  | 0.64239685 | 0.692 | 0.477 | 3.38E-59  | CA | KIAA0355 |
| 2.80E-55  | 0.62792043 | 0.499 | 0.315 | 3.83E-51  | CA | TMEM132C |
| 2.27E-73  | 0.59834063 | 0.624 | 0.387 | 3.11E-69  | CA | WSB1     |
| 5.37E-71  | 0.58594129 | 0.734 | 0.509 | 7.35E-67  | CA | SLC8A1   |
| 2.09E-69  | 0.58016036 | 0.704 | 0.475 | 2.86E-65  | CA | RYR3     |
| 6.02E-31  | 0.57729666 | 0.338 | 0.21  | 8.24E-27  | CA | RGS6     |
| 5.52E-51  | 0.57255326 | 0.505 | 0.318 | 7.55E-47  | CA | BRINP3   |
| 3.91E-91  | 0.5718352  | 0.199 | 0.041 | 5.35E-87  | CA | MOG      |
| 4.18E-69  | 0.57018848 | 0.507 | 0.273 | 5.71E-65  | CA | CADPS2   |
| 7.30E-40  | 0.56866185 | 0.46  | 0.304 | 9.98E-36  | CA | WIF1     |
| 3.22E-77  | 0.56777131 | 0.364 | 0.154 | 4.41E-73  | CA | MYLK     |
| 2.39E-61  | 0.56677211 | 0.629 | 0.425 | 3.27E-57  | CA | COL5A3   |
| 1.40E-43  | 0.55073713 | 0.161 | 0.056 | 1.91E-39  | CA | CPAMD8   |
| 4.04E-60  | 0.54545046 | 0.246 | 0.093 | 5.52E-56  | CA | TOX      |
| 4.36E-82  | 0.5436116  | 0.177 | 0.035 | 5.97E-78  | CA | SPP1     |
| 1.69E-60  | 0.53486783 | 0.251 | 0.096 | 2.31E-56  | CA | NDST3    |
| 5.50E-58  | 0.52562202 | 0.433 | 0.234 | 7.53E-54  | CA | EYA1     |
| 1.77E-70  | 0.52484637 | 0.676 | 0.427 | 2.42E-66  | CA | CTNNA3   |
| 1.29E-31  | 0.51156963 | 0.79  | 0.674 | 1.77E-27  | CA | DCLK2    |

|          |            |       |       |          |    |          |
|----------|------------|-------|-------|----------|----|----------|
| 1.04E-81 | 0.50976093 | 0.163 | 0.028 | 1.42E-77 | CA | CNTN2    |
| 8.23E-51 | 0.50321601 | 0.362 | 0.188 | 1.13E-46 | CA | GPAM     |
| 1.39E-41 | 0.49987979 | 0.889 | 0.862 | 1.91E-37 | CA | GPC5     |
| 5.49E-65 | 0.49823317 | 0.171 | 0.044 | 7.52E-61 | CA | SATB2    |
| 2.91E-55 | 0.48668538 | 0.413 | 0.218 | 3.98E-51 | CA | MAN2A1   |
| 1.07E-50 | 0.48534121 | 0.568 | 0.358 | 1.46E-46 | CA | FOXP1    |
| 2.11E-50 | 0.47079975 | 0.307 | 0.144 | 2.89E-46 | CA | QDPR     |
| 5.62E-58 | 0.47063774 | 0.169 | 0.048 | 7.69E-54 | CA | TRPC4    |
| 8.97E-49 | 0.47063675 | 0.514 | 0.319 | 1.23E-44 | CA | NAV1     |
| 9.08E-40 | 0.46985525 | 0.382 | 0.223 | 1.24E-35 | CA | KCNN2    |
| 1.53E-52 | 0.46354946 | 0.41  | 0.214 | 2.09E-48 | CA | ELMO1    |
| 3.20E-32 | 0.4622621  | 0.563 | 0.407 | 4.38E-28 | CA | LHFPL3   |
| 1.72E-53 | 0.45514039 | 0.527 | 0.307 | 2.35E-49 | CA | PIP4K2A  |
| 1.14E-46 | 0.4546733  | 0.631 | 0.44  | 1.56E-42 | CA | ARHGAP21 |
| 4.60E-41 | 0.45122771 | 0.245 | 0.114 | 6.29E-37 | CA | OLFM3    |
| 1.70E-58 | 0.44781059 | 0.207 | 0.069 | 2.32E-54 | CA | TF       |
| 1.97E-36 | 0.44695254 | 0.466 | 0.297 | 2.69E-32 | CA | ITPKB    |
| 3.07E-42 | 0.44687561 | 0.282 | 0.138 | 4.20E-38 | CA | PRKCB    |
