# Supplementary material
Source: PubMed Central journal article supplement (PMC9343414)
Supplement: 41422_2022_678_MOESM18_ESM.pdf [file 41422_2022_678_MOESM18_ESM.pdf]

**Supplementary information****TableS4. Differentially expressed genes among macaque Astrocyte, NSC1 and NSC2**

|          | p_val    | avg_log2FC | pct.1 | pct.2 | p_val_adj  | cluster   | gene     |
|----------|----------|------------|-------|-------|------------|-----------|----------|
| ECT2L    | 3.24E-06 | 0.27136656 | 0.156 | 0.12  | 0.04432593 | Astrocyte | ECT2L    |
| DOCK10   | 3.10E-06 | 0.25559368 | 0.33  | 0.292 | 0.04237988 | Astrocyte | DOCK10   |
| ANKRD6   | 2.30E-06 | 0.2697472  | 0.138 | 0.104 | 0.031452   | Astrocyte | ANKRD6   |
| EFTUD2   | 1.79E-06 | 0.40280697 | 0.201 | 0.165 | 0.02454095 | Astrocyte | EFTUD2   |
| SLC24A4  | 1.73E-06 | 0.29009574 | 0.118 | 0.086 | 0.02361861 | Astrocyte | SLC24A4  |
| CSMD2    | 1.46E-06 | 0.26851538 | 0.365 | 0.332 | 0.01993495 | Astrocyte | CSMD2    |
| ITGA6    | 3.23E-07 | 0.26996512 | 0.404 | 0.372 | 0.00441745 | Astrocyte | ITGA6    |
| PLXNA4   | 2.79E-07 | 0.27109524 | 0.395 | 0.362 | 0.0038194  | Astrocyte | PLXNA4   |
| SOX61    | 2.29E-07 | 0.2501506  | 0.527 | 0.51  | 0.00313106 | Astrocyte | SOX6     |
| MYO18A   | 2.05E-07 | 0.28983665 | 0.311 | 0.271 | 0.00280898 | Astrocyte | MYO18A   |
| ZSWIM5   | 1.86E-07 | 0.2698357  | 0.442 | 0.409 | 0.00254302 | Astrocyte | ZSWIM5   |
| KCTD15   | 1.81E-07 | 0.26019247 | 0.229 | 0.185 | 0.00247679 | Astrocyte | KCTD15   |
| AMPH     | 1.66E-07 | 0.28931547 | 0.23  | 0.188 | 0.00226889 | Astrocyte | AMPH     |
| LPCAT4   | 1.44E-07 | 0.31160277 | 0.221 | 0.177 | 0.00196788 | Astrocyte | LPCAT4   |
| NETO2    | 1.38E-07 | 0.29172289 | 0.296 | 0.253 | 0.00189354 | Astrocyte | NETO2    |
| LRRC4C   | 1.21E-07 | 0.27121767 | 0.298 | 0.247 | 0.00165883 | Astrocyte | LRRC4C   |
| FBXL2    | 9.79E-08 | 0.28957907 | 0.119 | 0.082 | 0.00133856 | Astrocyte | FBXL2    |
| CPNE2    | 8.70E-08 | 0.33432407 | 0.197 | 0.156 | 0.00119059 | Astrocyte | CPNE2    |
| KREMEN1  | 6.60E-08 | 0.31473296 | 0.244 | 0.199 | 0.00090332 | Astrocyte | KREMEN1  |
| COLGALT2 | 6.27E-08 | 0.26633037 | 0.165 | 0.123 | 0.00085827 | Astrocyte | COLGALT2 |
| SUSD4    | 4.59E-08 | 0.27937804 | 0.264 | 0.216 | 0.00062771 | Astrocyte | SUSD4    |
| SPOCK3   | 3.44E-08 | 0.28039688 | 0.415 | 0.373 | 0.00047054 | Astrocyte | SPOCK3   |
| PITPNM2  | 3.31E-08 | 0.31021033 | 0.271 | 0.224 | 0.00045305 | Astrocyte | PITPNM2  |
| SLC39A11 | 2.59E-08 | 0.412219   | 0.455 | 0.424 | 0.0003548  | Astrocyte | SLC39A11 |
| NRG2     | 2.31E-08 | 0.25188359 | 0.342 | 0.29  | 0.00031607 | Astrocyte | NRG2     |
| SLIT1    | 2.03E-08 | 0.30112991 | 0.231 | 0.183 | 0.00027705 | Astrocyte | SLIT1    |
| ADCY2    | 2.00E-08 | 0.29558044 | 0.625 | 0.623 | 0.00027289 | Astrocyte | ADCY2    |
| RIPK2    | 1.23E-08 | 0.28795307 | 0.161 | 0.117 | 0.00016798 | Astrocyte | RIPK2    |
| SLC24A2  | 6.86E-09 | 0.28255035 | 0.406 | 0.36  | 9.38E-05   | Astrocyte | SLC24A2  |
| GAB2     | 5.35E-09 | 0.31619627 | 0.416 | 0.372 | 7.31E-05   | Astrocyte | GAB2     |
| PCDHB4   | 5.02E-09 | 0.31590249 | 0.106 | 0.068 | 6.86E-05   | Astrocyte | PCDHB4   |
| SRPX1    | 4.65E-09 | 0.28887055 | 0.15  | 0.105 | 6.36E-05   | Astrocyte | SRPX     |
| AKAP61   | 4.36E-09 | 0.2735289  | 0.543 | 0.519 | 5.96E-05   | Astrocyte | AKAP6    |
| SORD     | 4.17E-09 | 0.31077009 | 0.139 | 0.095 | 5.70E-05   | Astrocyte | SORD     |
| STK33    | 3.72E-09 | 0.36096529 | 0.218 | 0.168 | 5.09E-05   | Astrocyte | STK33    |
| GRAMD2B  | 8.22E-10 | 0.26290812 | 0.706 | 0.708 | 1.12E-05   | Astrocyte | GRAMD2B  |
| PPP1R9A  | 4.86E-10 | 0.25236889 | 0.507 | 0.462 | 6.64E-06   | Astrocyte | PPP1R9A  |
| MEGF9    | 4.48E-10 | 0.37022028 | 0.321 | 0.268 | 6.13E-06   | Astrocyte | MEGF9    |
| SDCCAG8  | 3.65E-10 | 0.29335295 | 0.632 | 0.618 | 4.99E-06   | Astrocyte | SDCCAG8  |
| ST6GAL1  | 1.94E-10 | 0.31819916 | 0.105 | 0.064 | 2.65E-06   | Astrocyte | ST6GAL1  |
| CD109    | 1.55E-10 | 0.31901378 | 0.135 | 0.088 | 2.12E-06   | Astrocyte | CD109    |
| ADCY8    | 1.05E-10 | 0.34904925 | 0.369 | 0.313 | 1.43E-06   | Astrocyte | ADCY8    |
| ABCC8    | 9.24E-11 | 0.275931   | 0.101 | 0.06  | 1.26E-06   | Astrocyte | ABCC8    |

|           |          |            |       |       |          |           |           |
|-----------|----------|------------|-------|-------|----------|-----------|-----------|
| RASGRP1   | 9.03E-11 | 0.34334495 | 0.188 | 0.135 | 1.23E-06 | Astrocyte | RASGRP1   |
| AHNAK1    | 6.55E-11 | 0.32511333 | 0.199 | 0.144 | 8.95E-07 | Astrocyte | AHNAK     |
| ADCY1     | 4.66E-11 | 0.32634584 | 0.15  | 0.1   | 6.38E-07 | Astrocyte | ADCY1     |
| KCNT2     | 4.64E-11 | 0.30673655 | 0.424 | 0.368 | 6.34E-07 | Astrocyte | KCNT2     |
| CLIC4     | 3.99E-11 | 0.34485194 | 0.196 | 0.141 | 5.45E-07 | Astrocyte | CLIC4     |
| TNFSF4    | 3.88E-11 | 0.26545061 | 0.608 | 0.57  | 5.31E-07 | Astrocyte | TNFSF4    |
| ITPR1     | 2.91E-11 | 0.33181661 | 0.193 | 0.138 | 3.98E-07 | Astrocyte | ITPR1     |
| SRGAP1    | 2.64E-11 | 0.34368942 | 0.274 | 0.215 | 3.61E-07 | Astrocyte | SRGAP1    |
| DAPK1     | 2.20E-11 | 0.29467085 | 0.743 | 0.741 | 3.00E-07 | Astrocyte | DAPK1     |
| DPYSL2    | 1.55E-11 | 0.34476678 | 0.528 | 0.497 | 2.12E-07 | Astrocyte | DPYSL2    |
| KIAA1549L | 9.89E-12 | 0.35006344 | 0.355 | 0.297 | 1.35E-07 | Astrocyte | KIAA1549L |
| PHYHIPL   | 8.03E-12 | 0.39728731 | 0.452 | 0.406 | 1.10E-07 | Astrocyte | PHYHIPL   |
| RETREG1   | 5.69E-12 | 0.35884201 | 0.236 | 0.178 | 7.78E-08 | Astrocyte | RETREG1   |
| MAN1C1    | 4.31E-12 | 0.41679345 | 0.198 | 0.141 | 5.89E-08 | Astrocyte | MAN1C1    |
| PADI2     | 3.16E-12 | 0.40182607 | 0.419 | 0.37  | 4.33E-08 | Astrocyte | PADI2     |
| CD44      | 3.05E-12 | 0.42737339 | 0.13  | 0.081 | 4.17E-08 | Astrocyte | CD44      |
| CDH4      | 2.93E-12 | 0.26298794 | 0.872 | 0.861 | 4.01E-08 | Astrocyte | CDH4      |
| STRIP2    | 1.67E-12 | 0.31199132 | 0.112 | 0.064 | 2.29E-08 | Astrocyte | STRIP2    |
| RFX4      | 1.33E-12 | 0.30019473 | 0.757 | 0.756 | 1.82E-08 | Astrocyte | RFX4      |
| GAREM1    | 1.20E-12 | 0.39909289 | 0.348 | 0.287 | 1.64E-08 | Astrocyte | GAREM1    |
| MAP3K5    | 7.26E-13 | 0.3477048  | 0.407 | 0.348 | 9.92E-09 | Astrocyte | MAP3K5    |
| RHPN1     | 4.51E-13 | 0.35043296 | 0.171 | 0.113 | 6.16E-09 | Astrocyte | RHPN1     |
| TXNIP1    | 4.23E-13 | 0.43471614 | 0.325 | 0.263 | 5.79E-09 | Astrocyte | TXNIP     |
| OXR1      | 1.96E-13 | 0.25115578 | 0.665 | 0.618 | 2.69E-09 | Astrocyte | OXR1      |
| EPS15L1   | 1.65E-13 | 0.32199916 | 0.523 | 0.471 | 2.25E-09 | Astrocyte | EPS15L1   |
| ANKFN11   | 1.47E-13 | 0.39436458 | 0.299 | 0.229 | 2.02E-09 | Astrocyte | ANKFN1    |
| ECE11     | 1.26E-13 | 0.39799165 | 0.407 | 0.349 | 1.73E-09 | Astrocyte | ECE1      |
| SH3PXD2A  | 3.03E-14 | 0.43111403 | 0.196 | 0.136 | 4.14E-10 | Astrocyte | SH3PXD2A  |
| CACNA1E   | 2.46E-14 | 0.31216341 | 0.478 | 0.415 | 3.37E-10 | Astrocyte | CACNA1E   |
| ANGPT1    | 1.92E-14 | 0.38871568 | 0.633 | 0.608 | 2.63E-10 | Astrocyte | ANGPT1    |
| SNTB11    | 1.26E-14 | 0.35783467 | 0.458 | 0.389 | 1.73E-10 | Astrocyte | SNTB1     |
| KCNN2     | 9.64E-15 | 0.49047601 | 0.245 | 0.18  | 1.32E-10 | Astrocyte | KCNN2     |
| TMEM231   | 6.52E-15 | 0.40093108 | 0.173 | 0.111 | 8.92E-11 | Astrocyte | TMEM231   |
| IL17RB    | 6.26E-15 | 0.46605784 | 0.221 | 0.155 | 8.56E-11 | Astrocyte | IL17RB    |
| CXXC5     | 4.50E-15 | 0.37090068 | 0.147 | 0.088 | 6.16E-11 | Astrocyte | CXXC5     |
| SYNDIG1   | 3.56E-15 | 0.41908873 | 0.147 | 0.089 | 4.87E-11 | Astrocyte | SYNDIG1   |
| CALD11    | 3.29E-15 | 0.39036103 | 0.302 | 0.23  | 4.49E-11 | Astrocyte | CALD1     |
| COL4A5    | 1.42E-15 | 0.39116131 | 0.318 | 0.242 | 1.95E-11 | Astrocyte | COL4A5    |
| AQP4      | 1.83E-16 | 0.43332785 | 0.592 | 0.548 | 2.51E-12 | Astrocyte | AQP4      |
| CABCOCO1  | 1.57E-16 | 0.39562528 | 0.2   | 0.13  | 2.15E-12 | Astrocyte | CABCOCO1  |
| SEMA5A    | 6.53E-17 | 0.45960183 | 0.364 | 0.286 | 8.93E-13 | Astrocyte | SEMA5A    |
| SLC16A9   | 4.34E-17 | 0.36214356 | 0.123 | 0.065 | 5.94E-13 | Astrocyte | SLC16A9   |
| RGS9      | 4.04E-17 | 0.40774738 | 0.287 | 0.211 | 5.53E-13 | Astrocyte | RGS9      |
| NKAIN2    | 1.31E-17 | 0.30514224 | 0.733 | 0.701 | 1.79E-13 | Astrocyte | NKAIN2    |
| ZFP36L11  | 1.13E-17 | 0.45272422 | 0.382 | 0.309 | 1.55E-13 | Astrocyte | ZFP36L1   |
| ADD3      | 4.30E-18 | 0.34183881 | 0.761 | 0.743 | 5.88E-14 | Astrocyte | ADD3      |

|          |          |            |       |       |          |           |          |
|----------|----------|------------|-------|-------|----------|-----------|----------|
| BICD11   | 2.82E-18 | 0.3368115  | 0.686 | 0.655 | 3.85E-14 | Astrocyte | BICD1    |
| MCF2L2   | 2.00E-18 | 0.43372572 | 0.729 | 0.704 | 2.73E-14 | Astrocyte | MCF2L2   |
| GSN      | 8.20E-19 | 0.46312442 | 0.318 | 0.236 | 1.12E-14 | Astrocyte | GSN      |
| FAM155A  | 4.06E-19 | 0.40442545 | 0.56  | 0.468 | 5.55E-15 | Astrocyte | FAM155A  |
| B3GLCT   | 3.95E-19 | 0.39560121 | 0.112 | 0.054 | 5.40E-15 | Astrocyte | B3GLCT   |
| KIAA1217 | 7.11E-20 | 0.53986272 | 0.193 | 0.118 | 9.73E-16 | Astrocyte | KIAA1217 |
| SLC14A1  | 6.86E-20 | 0.49468681 | 0.204 | 0.129 | 9.38E-16 | Astrocyte | SLC14A1  |
| CNTN1    | 5.91E-20 | 0.30570098 | 0.812 | 0.792 | 8.08E-16 | Astrocyte | CNTN1    |
| FRAS11   | 4.99E-20 | 0.38039209 | 0.33  | 0.233 | 6.83E-16 | Astrocyte | FRAS1    |
| COBLL1   | 3.13E-20 | 0.42310063 | 0.153 | 0.082 | 4.29E-16 | Astrocyte | COBLL1   |
| ALPK1    | 2.40E-20 | 0.43558271 | 0.137 | 0.07  | 3.28E-16 | Astrocyte | ALPK1    |
| OSGIN2   | 1.72E-20 | 0.46437374 | 0.22  | 0.141 | 2.35E-16 | Astrocyte | OSGIN2   |
| MYRIP    | 1.32E-20 | 0.47123762 | 0.445 | 0.365 | 1.80E-16 | Astrocyte | MYRIP    |
| DPP6     | 6.89E-21 | 0.42516286 | 0.635 | 0.589 | 9.43E-17 | Astrocyte | DPP6     |
| AGBL4    | 6.08E-21 | 0.36385095 | 0.613 | 0.541 | 8.32E-17 | Astrocyte | AGBL4    |
| STAC2    | 1.37E-21 | 0.41337224 | 0.131 | 0.064 | 1.88E-17 | Astrocyte | STAC2    |
| ID2      | 1.05E-21 | 0.5419512  | 0.226 | 0.144 | 1.44E-17 | Astrocyte | ID2      |
| RELN     | 5.79E-22 | 0.50606244 | 0.221 | 0.139 | 7.92E-18 | Astrocyte | RELN     |
| NRXN3    | 2.69E-22 | 0.32847527 | 0.863 | 0.83  | 3.68E-18 | Astrocyte | NRXN3    |
| PCSK61   | 2.38E-22 | 0.52287589 | 0.263 | 0.174 | 3.26E-18 | Astrocyte | PCSK6    |
| KCNN3    | 1.08E-22 | 0.5070551  | 0.255 | 0.167 | 1.47E-18 | Astrocyte | KCNN3    |
| PLEC     | 8.38E-23 | 0.45971525 | 0.381 | 0.288 | 1.15E-18 | Astrocyte | PLEC     |
| CTNNA3   | 2.59E-23 | 0.47862876 | 0.544 | 0.474 | 3.54E-19 | Astrocyte | CTNNA3   |
| DPYSL31  | 3.23E-24 | 0.46267395 | 0.139 | 0.065 | 4.42E-20 | Astrocyte | DPYSL3   |
| ABR      | 9.84E-25 | 0.46234861 | 0.568 | 0.501 | 1.35E-20 | Astrocyte | ABR      |
| GRIA1    | 5.06E-25 | 0.33895788 | 0.755 | 0.699 | 6.92E-21 | Astrocyte | GRIA1    |
| RASL12   | 3.11E-25 | 0.47820879 | 0.166 | 0.086 | 4.25E-21 | Astrocyte | RASL12   |
| RAB3C    | 2.71E-25 | 0.53246407 | 0.212 | 0.124 | 3.71E-21 | Astrocyte | RAB3C    |
| C2CD2    | 2.15E-25 | 0.54662766 | 0.19  | 0.106 | 2.95E-21 | Astrocyte | C2CD2    |
| DSCAML1  | 1.80E-25 | 0.60705633 | 0.325 | 0.228 | 2.46E-21 | Astrocyte | DSCAML1  |
| NRG1     | 9.73E-28 | 0.51786601 | 0.622 | 0.558 | 1.33E-23 | Astrocyte | NRG1     |
| IGFBP5   | 3.30E-28 | 0.55019908 | 0.161 | 0.077 | 4.52E-24 | Astrocyte | IGFBP5   |
| NFASC    | 3.08E-28 | 0.53099242 | 0.272 | 0.172 | 4.22E-24 | Astrocyte | NFASC    |
| SNED1    | 1.07E-29 | 0.56615003 | 0.324 | 0.217 | 1.46E-25 | Astrocyte | SNED1    |
| PHYHD1   | 1.01E-30 | 0.62774311 | 0.338 | 0.231 | 1.38E-26 | Astrocyte | PHYHD1   |
| KCNIP4   | 5.51E-31 | 0.30101789 | 0.928 | 0.883 | 7.54E-27 | Astrocyte | KCNIP4   |
| RGS6     | 3.40E-31 | 0.70747534 | 0.336 | 0.229 | 4.66E-27 | Astrocyte | RGS6     |
| CNTNAP2  | 3.19E-31 | 0.33674997 | 0.818 | 0.747 | 4.36E-27 | Astrocyte | CNTNAP2  |
| PRKAG2   | 7.54E-33 | 0.80778272 | 0.462 | 0.366 | 1.03E-28 | Astrocyte | PRKAG2   |
| COL9A2   | 3.10E-33 | 0.61788778 | 0.279 | 0.17  | 4.25E-29 | Astrocyte | COL9A2   |
| CD38     | 2.78E-34 | 0.67647317 | 0.251 | 0.142 | 3.80E-30 | Astrocyte | CD38     |
| P2RX7    | 1.64E-36 | 0.57538399 | 0.242 | 0.128 | 2.24E-32 | Astrocyte | P2RX7    |
| VCAN1    | 1.05E-37 | 0.55897569 | 0.408 | 0.274 | 1.44E-33 | Astrocyte | VCAN     |
| HSPB8    | 2.02E-38 | 0.54281739 | 0.111 | 0.032 | 2.77E-34 | Astrocyte | HSPB8    |
| WWOX     | 8.06E-41 | 0.44520948 | 0.912 | 0.886 | 1.10E-36 | Astrocyte | WWOX     |
| PLEKHA5  | 2.68E-41 | 0.5345809  | 0.745 | 0.679 | 3.66E-37 | Astrocyte | PLEKHA5  |

|            |           |            |       |       |            |           |            |
|------------|-----------|------------|-------|-------|------------|-----------|------------|
| MYO16      | 5.68E-42  | 0.76790279 | 0.347 | 0.22  | 7.77E-38   | Astrocyte | MYO16      |
| DAAM2      | 1.23E-42  | 0.48935796 | 0.807 | 0.756 | 1.69E-38   | Astrocyte | DAAM2      |
| MAN1A1     | 6.47E-45  | 0.66894837 | 0.396 | 0.256 | 8.85E-41   | Astrocyte | MAN1A1     |
| CDK5RAP2   | 1.59E-48  | 0.66744788 | 0.552 | 0.438 | 2.17E-44   | Astrocyte | CDK5RAP2   |
| PSD3       | 6.91E-51  | 0.53815582 | 0.705 | 0.601 | 9.45E-47   | Astrocyte | PSD3       |
| ADAMTS9    | 5.34E-52  | 0.73170823 | 0.225 | 0.094 | 7.30E-48   | Astrocyte | ADAMTS9    |
| NAV2       | 4.01E-52  | 0.47888015 | 0.863 | 0.81  | 5.49E-48   | Astrocyte | NAV2       |
| ALPK3      | 3.02E-57  | 0.81705298 | 0.493 | 0.342 | 4.13E-53   | Astrocyte | ALPK3      |
| WNK2       | 4.72E-58  | 0.7351342  | 0.579 | 0.451 | 6.46E-54   | Astrocyte | WNK2       |
| SLC28A1    | 1.04E-60  | 0.92434349 | 0.207 | 0.073 | 1.42E-56   | Astrocyte | SLC28A1    |
| ID3        | 5.52E-61  | 0.82632507 | 0.158 | 0.042 | 7.55E-57   | Astrocyte | ID3        |
| ST6GALNAC3 | 1.92E-68  | 0.81579295 | 0.57  | 0.415 | 2.63E-64   | Astrocyte | ST6GALNAC3 |
| MMP28      | 1.35E-68  | 0.78456344 | 0.159 | 0.036 | 1.85E-64   | Astrocyte | MMP28      |
| DCLK1      | 9.80E-72  | 0.54561138 | 0.91  | 0.865 | 1.34E-67   | Astrocyte | DCLK1      |
| SEMA3B     | 2.00E-72  | 0.85513376 | 0.411 | 0.23  | 2.74E-68   | Astrocyte | SEMA3B     |
| RERG       | 1.80E-72  | 0.88552335 | 0.366 | 0.183 | 2.46E-68   | Astrocyte | RERG       |
| CROCC      | 2.21E-76  | 0.99025708 | 0.336 | 0.158 | 3.02E-72   | Astrocyte | CROCC      |
| PPP2R2B    | 1.82E-77  | 0.53369766 | 0.932 | 0.884 | 2.49E-73   | Astrocyte | PPP2R2B    |
| CPAMD8     | 2.70E-89  | 0.90636289 | 0.146 | 0.017 | 3.70E-85   | Astrocyte | CPAMD8     |
| XIRP2      | 6.21E-91  | 1.1364558  | 0.19  | 0.038 | 8.50E-87   | Astrocyte | XIRP2      |
| ITGB4      | 9.24E-103 | 0.86908002 | 0.724 | 0.564 | 1.26E-98   | Astrocyte | ITGB4      |
| SLC38A1    | 1.45E-105 | 1.26617477 | 0.262 | 0.073 | 1.99E-101  | Astrocyte | SLC38A1    |
| DCLK2      | 4.16E-109 | 1.04954091 | 0.759 | 0.647 | 5.70E-105  | Astrocyte | DCLK2      |
| KLHL29     | 1.20E-110 | 1.1890194  | 0.414 | 0.188 | 1.64E-106  | Astrocyte | KLHL29     |
| RNF182     | 2.28E-122 | 1.05080582 | 0.266 | 0.064 | 3.12E-118  | Astrocyte | RNF182     |
| KAZN       | 7.61E-127 | 1.24743863 | 0.659 | 0.449 | 1.04E-122  | Astrocyte | KAZN       |
| CACNA2D3   | 5.11E-135 | 1.18266277 | 0.747 | 0.565 | 6.99E-131  | Astrocyte | CACNA2D3   |
| DPP10      | 1.82E-165 | 1.00552973 | 0.965 | 0.896 | 2.49E-161  | Astrocyte | DPP10      |
| GFAP       | 1.67E-189 | 1.42082366 | 0.721 | 0.455 | 2.28E-185  | Astrocyte | GFAP       |
| KIF1B      | 1.37E-06  | 0.26503315 | 0.428 | 0.384 | 0.01871815 | NSC1      | KIF1B      |
| CACNA1A    | 2.19E-07  | 0.28421519 | 0.349 | 0.282 | 0.00300051 | NSC1      | CACNA1A    |
| MTSS1      | 9.29E-09  | 0.26550735 | 0.334 | 0.266 | 0.00012705 | NSC1      | MTSS1      |
| GNAQ       | 5.48E-11  | 0.27543086 | 0.403 | 0.328 | 7.50E-07   | NSC1      | GNAQ       |
| ITGA8      | 7.24E-12  | 0.28487269 | 0.123 | 0.073 | 9.91E-08   | NSC1      | ITGA8      |
| FGFR3      | 1.50E-12  | 0.28212018 | 0.292 | 0.213 | 2.05E-08   | NSC1      | FGFR3      |
| MGAT5      | 9.31E-14  | 0.26490649 | 0.212 | 0.14  | 1.27E-09   | NSC1      | MGAT5      |
| SEC14L1    | 4.63E-14  | 0.25531897 | 0.298 | 0.211 | 6.34E-10   | NSC1      | SEC14L1    |
| BRINP3     | 9.12E-15  | 0.37189803 | 0.317 | 0.234 | 1.25E-10   | NSC1      | BRINP3     |
| HRH1       | 6.04E-15  | 0.31767441 | 0.13  | 0.071 | 8.26E-11   | NSC1      | HRH1       |
| PCDH7      | 2.33E-15  | 0.34653679 | 0.276 | 0.193 | 3.18E-11   | NSC1      | PCDH7      |
| TTC23L     | 2.15E-15  | 0.29096585 | 0.338 | 0.243 | 2.93E-11   | NSC1      | TTC23L     |
| ADGRB1     | 1.67E-15  | 0.26440314 | 0.149 | 0.085 | 2.28E-11   | NSC1      | ADGRB1     |
| VAV3       | 1.22E-15  | 0.28295649 | 0.343 | 0.246 | 1.67E-11   | NSC1      | VAV3       |
| CHST11     | 1.18E-15  | 0.38139842 | 0.344 | 0.255 | 1.61E-11   | NSC1      | CHST11     |
| PSD2       | 1.09E-16  | 0.28162649 | 0.474 | 0.362 | 1.49E-12   | NSC1      | PSD2       |
| SLC6A1     | 9.10E-17  | 0.2562721  | 0.495 | 0.374 | 1.24E-12   | NSC1      | SLC6A1     |

|          |          |            |       |       |          |      |          |
|----------|----------|------------|-------|-------|----------|------|----------|
| SDS      | 7.98E-17 | 0.26267148 | 0.228 | 0.144 | 1.09E-12 | NSC1 | SDS      |
| TP53BP2  | 7.22E-17 | 0.25215812 | 0.446 | 0.327 | 9.88E-13 | NSC1 | TP53BP2  |
| BRINP1   | 5.70E-17 | 0.32217127 | 0.393 | 0.287 | 7.80E-13 | NSC1 | BRINP1   |
| PDGFRB   | 4.55E-17 | 0.27005264 | 0.261 | 0.168 | 6.22E-13 | NSC1 | PDGFRB   |
| CSPG5    | 4.46E-17 | 0.26245343 | 0.341 | 0.237 | 6.10E-13 | NSC1 | CSPG5    |
| AHCTF1   | 2.92E-17 | 0.26377988 | 0.54  | 0.416 | 3.99E-13 | NSC1 | AHCTF1   |
| PRDM16   | 1.68E-17 | 0.38486767 | 0.308 | 0.217 | 2.30E-13 | NSC1 | PRDM16   |
| KCNH5    | 5.23E-18 | 0.27768434 | 0.219 | 0.133 | 7.15E-14 | NSC1 | KCNH5    |
| FAM184A  | 5.00E-18 | 0.29266285 | 0.454 | 0.333 | 6.84E-14 | NSC1 | FAM184A  |
| GABRG1   | 1.65E-18 | 0.26966011 | 0.4   | 0.284 | 2.25E-14 | NSC1 | GABRG1   |
| FOXN3    | 1.30E-18 | 0.25240609 | 0.73  | 0.612 | 1.78E-14 | NSC1 | FOXN3    |
| AKAP12   | 4.28E-19 | 0.28038087 | 0.23  | 0.14  | 5.86E-15 | NSC1 | AKAP12   |
| PDE9A    | 2.51E-19 | 0.28867833 | 0.304 | 0.201 | 3.44E-15 | NSC1 | PDE9A    |
| DOCK5    | 2.28E-19 | 0.28506958 | 0.218 | 0.129 | 3.11E-15 | NSC1 | DOCK5    |
| FUT10    | 3.49E-20 | 0.29156227 | 0.432 | 0.308 | 4.78E-16 | NSC1 | FUT10    |
| RP1      | 2.89E-20 | 0.27790461 | 0.242 | 0.146 | 3.95E-16 | NSC1 | RP1      |
| ESRRG    | 1.98E-20 | 0.29587066 | 0.287 | 0.183 | 2.71E-16 | NSC1 | ESRRG    |
| PIPOX    | 1.18E-20 | 0.306058   | 0.289 | 0.185 | 1.62E-16 | NSC1 | PIPOX    |
| PDGFC    | 1.18E-20 | 0.28240232 | 0.435 | 0.307 | 1.61E-16 | NSC1 | PDGFC    |
| PTN      | 7.86E-21 | 0.25376562 | 0.441 | 0.31  | 1.07E-16 | NSC1 | PTN      |
| PID1     | 5.02E-21 | 0.26847139 | 0.362 | 0.241 | 6.87E-17 | NSC1 | PID1     |
| ZMYND8   | 4.56E-21 | 0.28929799 | 0.643 | 0.515 | 6.24E-17 | NSC1 | ZMYND8   |
| ENDOU    | 2.13E-21 | 0.29345685 | 0.178 | 0.095 | 2.91E-17 | NSC1 | ENDOU    |
| CPT1A    | 1.73E-21 | 0.27774625 | 0.162 | 0.083 | 2.36E-17 | NSC1 | CPT1A    |
| SRGAP3   | 1.62E-21 | 0.28583901 | 0.64  | 0.498 | 2.21E-17 | NSC1 | SRGAP3   |
| FGD6     | 1.60E-21 | 0.26588711 | 0.596 | 0.451 | 2.19E-17 | NSC1 | FGD6     |
| TOM1L2   | 1.03E-21 | 0.26006238 | 0.705 | 0.579 | 1.40E-17 | NSC1 | TOM1L2   |
| SNTA1    | 9.47E-22 | 0.25414121 | 0.619 | 0.485 | 1.30E-17 | NSC1 | SNTA1    |
| SEMA4A   | 8.17E-22 | 0.28968616 | 0.201 | 0.111 | 1.12E-17 | NSC1 | SEMA4A   |
| GALNT18  | 3.18E-22 | 0.25427507 | 0.81  | 0.7   | 4.34E-18 | NSC1 | GALNT18  |
| PTPRJ    | 1.70E-22 | 0.2956809  | 0.149 | 0.072 | 2.33E-18 | NSC1 | PTPRJ    |
| ARHGAP32 | 1.04E-22 | 0.26770041 | 0.788 | 0.672 | 1.42E-18 | NSC1 | ARHGAP32 |
| LHFPL6   | 7.76E-23 | 0.27439329 | 0.759 | 0.639 | 1.06E-18 | NSC1 | LHFPL6   |
| SERPINE2 | 7.17E-23 | 0.31982688 | 0.281 | 0.173 | 9.80E-19 | NSC1 | SERPINE2 |
| PCTP     | 2.75E-23 | 0.3457231  | 0.33  | 0.215 | 3.77E-19 | NSC1 | PCTP     |
| UNC5C    | 1.11E-24 | 0.29131657 | 0.651 | 0.514 | 1.52E-20 | NSC1 | UNC5C    |
| ITSN1    | 5.04E-25 | 0.32185573 | 0.597 | 0.452 | 6.90E-21 | NSC1 | ITSN1    |
| DOCK1    | 2.18E-25 | 0.28756343 | 0.762 | 0.64  | 2.99E-21 | NSC1 | DOCK1    |
| EGFR     | 1.79E-25 | 0.28435594 | 0.455 | 0.316 | 2.44E-21 | NSC1 | EGFR     |
| DDAH1    | 1.45E-25 | 0.35255776 | 0.49  | 0.354 | 1.98E-21 | NSC1 | DDAH1    |
| SHISA9   | 1.33E-25 | 0.38549442 | 0.586 | 0.458 | 1.82E-21 | NSC1 | SHISA9   |
| PTPN13   | 1.23E-25 | 0.3271268  | 0.489 | 0.35  | 1.68E-21 | NSC1 | PTPN13   |
| SORCS2   | 8.93E-26 | 0.36762515 | 0.514 | 0.381 | 1.22E-21 | NSC1 | SORCS2   |
| GRK3     | 7.23E-26 | 0.30067157 | 0.468 | 0.321 | 9.88E-22 | NSC1 | GRK3     |
| ZFHX4    | 5.06E-26 | 0.26178165 | 0.74  | 0.608 | 6.92E-22 | NSC1 | ZFHX4    |
| SLC25A18 | 4.41E-26 | 0.26571754 | 0.814 | 0.681 | 6.03E-22 | NSC1 | SLC25A18 |

|          |          |            |       |       |          |      |          |
|----------|----------|------------|-------|-------|----------|------|----------|
| SFXN1    | 2.09E-26 | 0.38610693 | 0.499 | 0.365 | 2.86E-22 | NSC1 | SFXN1    |
| LGR4     | 1.83E-26 | 0.3800031  | 0.435 | 0.3   | 2.51E-22 | NSC1 | LGR4     |
| PPARGC1A | 1.12E-26 | 0.32012263 | 0.324 | 0.199 | 1.53E-22 | NSC1 | PPARGC1A |
| CACNG4   | 1.02E-26 | 0.4049382  | 0.198 | 0.102 | 1.39E-22 | NSC1 | CACNG4   |
| MGLL     | 6.05E-27 | 0.33360164 | 0.497 | 0.353 | 8.28E-23 | NSC1 | MGLL     |
| SLC15A2  | 2.29E-27 | 0.30630694 | 0.692 | 0.543 | 3.13E-23 | NSC1 | SLC15A2  |
| EZR      | 1.06E-27 | 0.36567278 | 0.251 | 0.14  | 1.44E-23 | NSC1 | EZR      |
| SPRED1   | 8.35E-28 | 0.32259384 | 0.474 | 0.326 | 1.14E-23 | NSC1 | SPRED1   |
| EEF2K    | 7.13E-28 | 0.34356488 | 0.494 | 0.343 | 9.75E-24 | NSC1 | EEF2K    |
| FAM171B  | 4.85E-28 | 0.34186174 | 0.577 | 0.431 | 6.64E-24 | NSC1 | FAM171B  |
| TNS3     | 4.28E-28 | 0.32102005 | 0.56  | 0.402 | 5.86E-24 | NSC1 | TNS3     |
| WASF3    | 3.86E-28 | 0.35180391 | 0.415 | 0.275 | 5.28E-24 | NSC1 | WASF3    |
| KCNIP1   | 3.82E-28 | 0.37447987 | 0.528 | 0.382 | 5.22E-24 | NSC1 | KCNIP1   |
| SASH1    | 3.39E-28 | 0.25790425 | 0.914 | 0.824 | 4.64E-24 | NSC1 | SASH1    |
| ASAP2    | 1.49E-28 | 0.35375482 | 0.506 | 0.352 | 2.04E-24 | NSC1 | ASAP2    |
| FNDC3B   | 6.87E-29 | 0.34927308 | 0.596 | 0.451 | 9.40E-25 | NSC1 | FNDC3B   |
| ZSWIM6   | 3.97E-29 | 0.4798693  | 0.601 | 0.474 | 5.42E-25 | NSC1 | ZSWIM6   |
| EPB41L2  | 1.65E-29 | 0.36310677 | 0.581 | 0.429 | 2.26E-25 | NSC1 | EPB41L2  |
| CPEB3    | 1.32E-29 | 0.30867782 | 0.76  | 0.632 | 1.80E-25 | NSC1 | CPEB3    |
| GRIN2C   | 7.01E-30 | 0.3665805  | 0.15  | 0.063 | 9.59E-26 | NSC1 | GRIN2C   |
| VEGFA    | 4.64E-30 | 0.38419094 | 0.289 | 0.166 | 6.34E-26 | NSC1 | VEGFA    |
| HIF3A    | 7.39E-31 | 0.39920875 | 0.247 | 0.131 | 1.01E-26 | NSC1 | HIF3A    |
| ALDH1A1  | 3.74E-31 | 0.41760899 | 0.634 | 0.489 | 5.12E-27 | NSC1 | ALDH1A1  |
| ADGRL3   | 1.80E-31 | 0.2877932  | 0.766 | 0.625 | 2.46E-27 | NSC1 | ADGRL3   |
| MEGF10   | 1.25E-31 | 0.36540269 | 0.607 | 0.447 | 1.71E-27 | NSC1 | MEGF10   |
| GABRA2   | 7.36E-32 | 0.31712606 | 0.702 | 0.54  | 1.01E-27 | NSC1 | GABRA2   |
| PAPLN    | 4.55E-32 | 0.37820232 | 0.226 | 0.114 | 6.22E-28 | NSC1 | PAPLN    |
| SLC1A4   | 3.23E-32 | 0.42216388 | 0.306 | 0.177 | 4.41E-28 | NSC1 | SLC1A4   |
| SLC39A12 | 2.37E-32 | 0.41310577 | 0.267 | 0.143 | 3.24E-28 | NSC1 | SLC39A12 |
| PHACTR3  | 1.89E-32 | 0.35210167 | 0.601 | 0.446 | 2.58E-28 | NSC1 | PHACTR3  |
| MCC      | 1.63E-32 | 0.2967775  | 0.751 | 0.588 | 2.23E-28 | NSC1 | MCC      |
| SOX5     | 4.52E-33 | 0.30440691 | 0.86  | 0.751 | 6.18E-29 | NSC1 | SOX5     |
| EYA2     | 4.31E-33 | 0.42081872 | 0.331 | 0.193 | 5.90E-29 | NSC1 | EYA2     |
| SFMBT2   | 1.73E-33 | 0.41292537 | 0.405 | 0.253 | 2.37E-29 | NSC1 | SFMBT2   |
| XYLT1    | 1.40E-33 | 0.3534379  | 0.617 | 0.446 | 1.92E-29 | NSC1 | XYLT1    |
| RORA     | 6.31E-35 | 0.3316492  | 0.755 | 0.597 | 8.63E-31 | NSC1 | RORA     |
| SEL1L3   | 5.08E-35 | 0.44093443 | 0.39  | 0.242 | 6.95E-31 | NSC1 | SEL1L3   |
| NID1     | 2.44E-35 | 0.41019323 | 0.392 | 0.239 | 3.34E-31 | NSC1 | NID1     |
| SFXN5    | 9.93E-36 | 0.31239516 | 0.863 | 0.769 | 1.36E-31 | NSC1 | SFXN5    |
| SLC6A11  | 4.33E-36 | 0.39546184 | 0.414 | 0.255 | 5.92E-32 | NSC1 | SLC6A11  |
| RAI14    | 1.06E-36 | 0.44798133 | 0.46  | 0.302 | 1.45E-32 | NSC1 | RAI14    |
| ARHGAP31 | 8.87E-37 | 0.4148117  | 0.504 | 0.337 | 1.21E-32 | NSC1 | ARHGAP31 |
| SH3RF1   | 4.09E-37 | 0.38964063 | 0.613 | 0.44  | 5.60E-33 | NSC1 | SH3RF1   |
| ACBD7    | 3.50E-37 | 0.50765712 | 0.31  | 0.174 | 4.78E-33 | NSC1 | ACBD7    |
| HTRA1    | 4.45E-38 | 0.4364815  | 0.409 | 0.248 | 6.09E-34 | NSC1 | HTRA1    |
| TCF7L2   | 3.77E-38 | 0.35396822 | 0.788 | 0.639 | 5.16E-34 | NSC1 | TCF7L2   |

|          |           |            |       |       |           |      |          |
|----------|-----------|------------|-------|-------|-----------|------|----------|
| MRVI1    | 2.87E-38  | 0.39918744 | 0.546 | 0.37  | 3.93E-34  | NSC1 | MRVI1    |
| HHIPL1   | 1.26E-38  | 0.51863169 | 0.282 | 0.149 | 1.72E-34  | NSC1 | HHIPL1   |
| ARHGAP26 | 3.29E-39  | 0.30614116 | 0.906 | 0.792 | 4.51E-35  | NSC1 | ARHGAP26 |
| TPD52L1  | 2.37E-39  | 0.47439911 | 0.435 | 0.274 | 3.25E-35  | NSC1 | TPD52L1  |
| TMEM132C | 2.27E-40  | 0.5323486  | 0.385 | 0.229 | 3.10E-36  | NSC1 | TMEM132C |
| RALGAPA2 | 4.43E-41  | 0.34975906 | 0.782 | 0.612 | 6.06E-37  | NSC1 | RALGAPA2 |
| GABBR1   | 3.69E-41  | 0.34002113 | 0.871 | 0.763 | 5.05E-37  | NSC1 | GABBR1   |
| EDNRB    | 2.03E-41  | 0.46148462 | 0.372 | 0.215 | 2.78E-37  | NSC1 | EDNRB    |
| GLI3     | 1.46E-41  | 0.33134914 | 0.864 | 0.728 | 2.00E-37  | NSC1 | GLI3     |
| ERBB4    | 8.09E-42  | 0.29335887 | 0.98  | 0.932 | 1.11E-37  | NSC1 | ERBB4    |
| PHLPP1   | 5.29E-42  | 0.3564902  | 0.88  | 0.759 | 7.23E-38  | NSC1 | PHLPP1   |
| NHSL1    | 1.43E-42  | 0.42574988 | 0.747 | 0.592 | 1.96E-38  | NSC1 | NHSL1    |
| FGFR1    | 1.21E-42  | 0.36616934 | 0.82  | 0.675 | 1.66E-38  | NSC1 | FGFR1    |
| GLI2     | 8.06E-43  | 0.52370533 | 0.242 | 0.112 | 1.10E-38  | NSC1 | GLI2     |
| GPAM     | 4.21E-43  | 0.47277225 | 0.252 | 0.118 | 5.75E-39  | NSC1 | GPAM     |
| CLDN10   | 3.75E-43  | 0.46889934 | 0.306 | 0.158 | 5.13E-39  | NSC1 | CLDN10   |
| RIN2     | 2.35E-45  | 0.48938949 | 0.564 | 0.385 | 3.21E-41  | NSC1 | RIN2     |
| FOLH1    | 1.42E-45  | 0.5115066  | 0.454 | 0.28  | 1.94E-41  | NSC1 | FOLH1    |
| ACACB    | 4.54E-47  | 0.39912456 | 0.746 | 0.577 | 6.21E-43  | NSC1 | ACACB    |
| OPHN1    | 2.51E-47  | 0.32415083 | 0.937 | 0.853 | 3.43E-43  | NSC1 | OPHN1    |
| EPHB1    | 8.73E-48  | 0.44242958 | 0.776 | 0.625 | 1.19E-43  | NSC1 | EPHB1    |
| ITPR2    | 6.90E-48  | 0.36665771 | 0.848 | 0.698 | 9.44E-44  | NSC1 | ITPR2    |
| EFNA5    | 1.70E-48  | 0.5161154  | 0.518 | 0.333 | 2.33E-44  | NSC1 | EFNA5    |
| PHKA1    | 7.38E-49  | 0.54006024 | 0.531 | 0.351 | 1.01E-44  | NSC1 | PHKA1    |
| ATP13A4  | 2.25E-50  | 0.40481898 | 0.84  | 0.683 | 3.08E-46  | NSC1 | ATP13A4  |
| ETNPPL   | 8.29E-51  | 0.43873505 | 0.715 | 0.512 | 1.13E-46  | NSC1 | ETNPPL   |
| PREX1    | 1.33E-53  | 0.46751709 | 0.793 | 0.622 | 1.83E-49  | NSC1 | PREX1    |
| PDZRN4   | 5.05E-58  | 0.60874174 | 0.843 | 0.698 | 6.91E-54  | NSC1 | PDZRN4   |
| GRID1    | 1.55E-63  | 0.50171816 | 0.73  | 0.521 | 2.12E-59  | NSC1 | GRID1    |
| COL5A3   | 1.84E-65  | 0.64842721 | 0.447 | 0.242 | 2.51E-61  | NSC1 | COL5A3   |
| UNC5D    | 2.10E-67  | 0.44471958 | 0.901 | 0.753 | 2.88E-63  | NSC1 | UNC5D    |
| RORB     | 1.45E-69  | 0.59124091 | 0.59  | 0.36  | 1.98E-65  | NSC1 | RORB     |
| SLCO1C1  | 2.24E-70  | 0.60475147 | 0.365 | 0.166 | 3.06E-66  | NSC1 | SLCO1C1  |
| MERTK    | 8.47E-72  | 0.60288304 | 0.595 | 0.361 | 1.16E-67  | NSC1 | MERTK    |
| ADGRV1   | 9.89E-73  | 0.25880718 | 1     | 0.997 | 1.35E-68  | NSC1 | ADGRV1   |
| RGS20    | 2.35E-74  | 0.53114244 | 0.809 | 0.61  | 3.21E-70  | NSC1 | RGS20    |
| GPC6     | 8.78E-75  | 0.4862177  | 0.89  | 0.756 | 1.20E-70  | NSC1 | GPC6     |
| MFGE8    | 5.46E-76  | 0.61497965 | 0.609 | 0.38  | 7.47E-72  | NSC1 | MFGE8    |
| MAPK4    | 1.21E-76  | 0.64942486 | 0.54  | 0.311 | 1.66E-72  | NSC1 | MAPK4    |
| NKAIN3   | 7.97E-77  | 0.30556896 | 0.998 | 0.988 | 1.09E-72  | NSC1 | NKAIN3   |
| CADM1    | 3.27E-78  | 0.47022863 | 0.946 | 0.868 | 4.48E-74  | NSC1 | CADM1    |
| ADGRB3   | 6.10E-82  | 0.29813934 | 0.998 | 0.989 | 8.34E-78  | NSC1 | ADGRB3   |
| CACNB2   | 2.73E-92  | 0.58470681 | 0.878 | 0.708 | 3.74E-88  | NSC1 | CACNB2   |
| OLFM2    | 4.41E-97  | 0.67385077 | 0.702 | 0.44  | 6.03E-93  | NSC1 | OLFM2    |
| PCDH9    | 5.84E-104 | 0.33431031 | 1     | 0.997 | 7.99E-100 | NSC1 | PCDH9    |
| GRM3     | 5.48E-104 | 0.79833543 | 0.641 | 0.373 | 7.50E-100 | NSC1 | GRM3     |

|          |           |            |       |       |            |      |          |
|----------|-----------|------------|-------|-------|------------|------|----------|
| WIF1     | 5.96E-107 | 1.07891507 | 0.427 | 0.18  | 8.15E-103  | NSC1 | WIF1     |
| SLC4A4   | 6.80E-111 | 0.57411014 | 0.952 | 0.835 | 9.30E-107  | NSC1 | SLC4A4   |
| PLCB1    | 4.59E-113 | 0.5167469  | 0.966 | 0.885 | 6.28E-109  | NSC1 | PLCB1    |
| CARMIL1  | 5.59E-117 | 0.57832637 | 0.932 | 0.793 | 7.65E-113  | NSC1 | CARMIL1  |
| FRMD4A   | 1.12E-121 | 0.49817372 | 0.995 | 0.95  | 1.53E-117  | NSC1 | FRMD4A   |
| ACSBG1   | 2.81E-122 | 0.81125904 | 0.623 | 0.33  | 3.84E-118  | NSC1 | ACSBG1   |
| GPM6A    | 1.27E-140 | 0.41879809 | 1     | 0.995 | 1.74E-136  | NSC1 | GPM6A    |
| PREX2    | 3.45E-167 | 0.71555807 | 0.924 | 0.729 | 4.71E-163  | NSC1 | PREX2    |
| SLC1A3   | 2.05E-177 | 0.61581141 | 0.992 | 0.944 | 2.80E-173  | NSC1 | SLC1A3   |
| NRXN1    | 9.74E-184 | 0.44944067 | 1     | 0.998 | 1.33E-179  | NSC1 | NRXN1    |
| GPC5     | 2.37E-194 | 1.08494565 | 0.897 | 0.722 | 3.24E-190  | NSC1 | GPC5     |
| SLC1A2   | 6.70E-308 | 0.76604738 | 1     | 0.98  | 9.16E-304  | NSC1 | SLC1A2   |
| LUZP2    | 0         | 1.6826671  | 0.798 | 0.387 | 0          | NSC1 | LUZP2    |
| LRP8     | 3.64E-06  | 0.2840505  | 0.182 | 0.111 | 0.04978529 | NSC2 | LRP8     |
| LYPD6    | 3.61E-06  | 0.29868307 | 0.111 | 0.058 | 0.04935645 | NSC2 | LYPD6    |
| BRAT1    | 3.43E-06  | 0.27179191 | 0.141 | 0.079 | 0.04693548 | NSC2 | BRAT1    |
| SEC11C   | 3.17E-06  | 0.25072338 | 0.124 | 0.066 | 0.04341709 | NSC2 | SEC11C   |
| NSG2     | 2.98E-06  | 0.32319108 | 0.197 | 0.122 | 0.04073302 | NSC2 | NSG2     |
| BRD8     | 2.95E-06  | 0.33277134 | 0.215 | 0.138 | 0.04037833 | NSC2 | BRD8     |
| ABCA8    | 2.93E-06  | 0.31315174 | 0.23  | 0.149 | 0.04002527 | NSC2 | ABCA8    |
| TMEM59   | 2.87E-06  | 0.29827093 | 0.156 | 0.091 | 0.03919473 | NSC2 | TMEM59   |
| NDRG1    | 2.81E-06  | 0.25326318 | 0.137 | 0.075 | 0.03846579 | NSC2 | NDRG1    |
| WBP2     | 2.72E-06  | 0.28806403 | 0.184 | 0.113 | 0.03715535 | NSC2 | WBP2     |
| BMPER    | 2.65E-06  | 0.39710714 | 0.152 | 0.087 | 0.0363138  | NSC2 | BMPER    |
| FRMD4B   | 2.62E-06  | 0.40992559 | 0.299 | 0.214 | 0.03582205 | NSC2 | FRMD4B   |
| SCAMP1   | 2.54E-06  | 0.35914829 | 0.284 | 0.2   | 0.03467982 | NSC2 | SCAMP1   |
| SLC25A46 | 2.52E-06  | 0.29732044 | 0.174 | 0.103 | 0.03440886 | NSC2 | SLC25A46 |
| ADAR     | 2.44E-06  | 0.2742851  | 0.206 | 0.128 | 0.0334247  | NSC2 | ADAR     |
| FAM171B1 | 2.23E-06  | 0.42597113 | 0.555 | 0.498 | 0.03056321 | NSC2 | FAM171B  |
| LAMP2    | 2.19E-06  | 0.31450491 | 0.226 | 0.145 | 0.02997961 | NSC2 | LAMP2    |
| ZCCHC8   | 2.18E-06  | 0.25785511 | 0.117 | 0.061 | 0.02986464 | NSC2 | ZCCHC8   |
| LASP1    | 2.14E-06  | 0.28792348 | 0.161 | 0.092 | 0.02932791 | NSC2 | LASP1    |
| KLHL42   | 2.13E-06  | 0.2524452  | 0.152 | 0.085 | 0.02918495 | NSC2 | KLHL42   |
| MGST3    | 1.93E-06  | 0.26373279 | 0.219 | 0.136 | 0.02633624 | NSC2 | MGST3    |
| KCTD6    | 1.85E-06  | 0.26032515 | 0.143 | 0.079 | 0.02535601 | NSC2 | KCTD6    |
| TMEM167A | 1.82E-06  | 0.25820898 | 0.113 | 0.058 | 0.02494245 | NSC2 | TMEM167A |
| RAB12    | 1.82E-06  | 0.29192683 | 0.208 | 0.129 | 0.02488423 | NSC2 | RAB12    |
| MLF2     | 1.81E-06  | 0.27121761 | 0.13  | 0.07  | 0.02470189 | NSC2 | MLF2     |
| DPP7     | 1.78E-06  | 0.35102207 | 0.217 | 0.137 | 0.02436174 | NSC2 | DPP7     |
| EIF1B    | 1.75E-06  | 0.29719028 | 0.141 | 0.078 | 0.02387548 | NSC2 | EIF1B    |
| CAMKV    | 1.69E-06  | 0.26675695 | 0.132 | 0.071 | 0.02314328 | NSC2 | CAMKV    |
| AASDHPPT | 1.61E-06  | 0.30865369 | 0.258 | 0.171 | 0.02200269 | NSC2 | AASDHPPT |
| CBX6     | 1.52E-06  | 0.34685592 | 0.26  | 0.173 | 0.02083939 | NSC2 | CBX6     |
| ZBTB4    | 1.46E-06  | 0.33020883 | 0.356 | 0.257 | 0.01994097 | NSC2 | ZBTB4    |
| NAPB     | 1.42E-06  | 0.29353527 | 0.297 | 0.2   | 0.01941659 | NSC2 | NAPB     |
| ADAMTSL3 | 1.41E-06  | 0.51714785 | 0.236 | 0.16  | 0.01930473 | NSC2 | ADAMTSL3 |



|           |          |            |       |       |            |      |               |
|-----------|----------|------------|-------|-------|------------|------|---------------|
| UST       | 1.40E-06 | 0.60172405 | 0.408 | 0.338 | 0.01910531 | NSC2 | UST           |
| TSC1      | 1.27E-06 | 0.28145183 | 0.108 | 0.054 | 0.01732886 | NSC2 | TSC1          |
| EIF5      | 1.26E-06 | 0.32847303 | 0.21  | 0.131 | 0.01722307 | NSC2 | EIF5          |
| AKIRIN1   | 1.25E-06 | 0.2710474  | 0.141 | 0.077 | 0.0170574  | NSC2 | AKIRIN1       |
| RPRD1A    | 1.20E-06 | 0.33160079 | 0.328 | 0.228 | 0.016383   | NSC2 | RPRD1A        |
| NTRK2     | 1.20E-06 | 0.2787528  | 0.816 | 0.772 | 0.0163559  | NSC2 | NTRK2         |
| NDFIP1    | 1.15E-06 | 0.32458626 | 0.416 | 0.307 | 0.01570396 | NSC2 | NDFIP1        |
| AHNAK     | 1.14E-06 | 0.37964022 | 0.245 | 0.163 | 0.0155861  | NSC2 | AHNAK         |
| PTTG1IP   | 1.09E-06 | 0.29978122 | 0.182 | 0.108 | 0.01488083 | NSC2 | PTTG1IP       |
| RHBDD2    | 9.43E-07 | 0.26831146 | 0.113 | 0.057 | 0.01289742 | NSC2 | RHBDD2        |
| AKAP6     | 9.05E-07 | 0.32175203 | 0.612 | 0.524 | 0.01237562 | NSC2 | AKAP6         |
| SNCA      | 8.93E-07 | 0.29548292 | 0.202 | 0.121 | 0.01221221 | NSC2 | SNCA          |
| NLGN4Y    | 8.82E-07 | 0.44677005 | 0.449 | 0.357 | 0.01206592 | NSC2 | NLGN4Y        |
| LRP3      | 7.82E-07 | 0.30083003 | 0.182 | 0.108 | 0.01069608 | NSC2 | LRP3          |
| MAP3K1    | 7.81E-07 | 0.35586386 | 0.204 | 0.126 | 0.01067999 | NSC2 | MAP3K1        |
| SLC16A2   | 6.91E-07 | 0.25359132 | 0.139 | 0.073 | 0.00944522 | NSC2 | SLC16A2       |
| GDAP1     | 6.58E-07 | 0.27854889 | 0.108 | 0.053 | 0.00900365 | NSC2 | GDAP1         |
| UBE2B     | 6.45E-07 | 0.36667571 | 0.295 | 0.199 | 0.00881841 | NSC2 | UBE2B         |
| PTPRG     | 6.44E-07 | 0.27158176 | 0.948 | 0.946 | 0.00880696 | NSC2 | PTPRG         |
| N4BP2L2   | 6.32E-07 | 0.30451498 | 0.547 | 0.442 | 0.00864301 | NSC2 | N4BP2L2       |
| RAD21     | 6.27E-07 | 0.3063944  | 0.206 | 0.125 | 0.00857027 | NSC2 | RAD21         |
| FBXW7     | 6.23E-07 | 0.41121947 | 0.471 | 0.379 | 0.00851533 | NSC2 | FBXW7         |
| PHF19     | 6.22E-07 | 0.3577273  | 0.126 | 0.066 | 0.00850508 | NSC2 | PHF19         |
| UBE2D3    | 6.19E-07 | 0.38003061 | 0.449 | 0.344 | 0.00847308 | NSC2 | UBE2D3        |
| KIDINS220 | 6.14E-07 | 0.34640526 | 0.451 | 0.363 | 0.00839927 | NSC2 | KIDINS220     |
| EEF1AKMT4 | 5.82E-07 | 0.30935157 | 0.113 | 0.056 | 0.00795452 | NSC2 | EEF1AKMT4-ECE |
| ATP6V1B2  | 5.78E-07 | 0.33191415 | 0.169 | 0.096 | 0.00790995 | NSC2 | ATP6V1B2      |
| VCP       | 5.69E-07 | 0.28352501 | 0.161 | 0.09  | 0.007779   | NSC2 | VCP           |
| COPS2     | 5.47E-07 | 0.34540294 | 0.143 | 0.078 | 0.00748165 | NSC2 | COPS2         |
| SH3RF3    | 5.03E-07 | 0.40789777 | 0.479 | 0.387 | 0.00687815 | NSC2 | SH3RF3        |
| RAB3GAP2  | 4.53E-07 | 0.36839999 | 0.414 | 0.31  | 0.00619959 | NSC2 | RAB3GAP2      |
| ANKFN1    | 4.43E-07 | 0.3584782  | 0.356 | 0.253 | 0.00605382 | NSC2 | ANKFN1        |
| DYNC1L1I2 | 4.28E-07 | 0.38610416 | 0.273 | 0.184 | 0.00585735 | NSC2 | DYNC1L1I2     |
| PINK1     | 4.09E-07 | 0.27116394 | 0.111 | 0.054 | 0.00559741 | NSC2 | PINK1         |
| TSPAN3    | 4.09E-07 | 0.35652052 | 0.241 | 0.152 | 0.00558981 | NSC2 | TSPAN3        |
| XPO7      | 4.08E-07 | 0.39033624 | 0.239 | 0.15  | 0.00558282 | NSC2 | XPO7          |
| VAT1L     | 3.97E-07 | 0.35340061 | 0.484 | 0.372 | 0.00543594 | NSC2 | VAT1L         |
| EIF3D     | 3.95E-07 | 0.28120662 | 0.108 | 0.052 | 0.00540752 | NSC2 | EIF3D         |
| EI24      | 3.52E-07 | 0.29691874 | 0.115 | 0.057 | 0.00481228 | NSC2 | EI24          |
| NCOA2     | 3.49E-07 | 0.40153744 | 0.527 | 0.43  | 0.00477744 | NSC2 | NCOA2         |
| HNRNPH1   | 3.45E-07 | 0.35963451 | 0.219 | 0.137 | 0.00471794 | NSC2 | HNRNPH1       |
| KIF3A     | 3.19E-07 | 0.33598529 | 0.31  | 0.213 | 0.00435661 | NSC2 | KIF3A         |
| TMEM59L   | 3.05E-07 | 0.32500001 | 0.243 | 0.152 | 0.00416769 | NSC2 | TMEM59L       |
| GOLGA7    | 2.88E-07 | 0.2513084  | 0.104 | 0.049 | 0.0039401  | NSC2 | GOLGA7        |
| NDUFB9    | 2.86E-07 | 0.25115889 | 0.113 | 0.054 | 0.00390895 | NSC2 | NDUFB9        |
| SNX18     | 2.82E-07 | 0.28186407 | 0.148 | 0.079 | 0.00385885 | NSC2 | SNX18         |

|         |          |            |       |       |            |      |         |
|---------|----------|------------|-------|-------|------------|------|---------|
| NSA2    | 2.82E-07 | 0.26988502 | 0.141 | 0.074 | 0.00385439 | NSC2 | NSA2    |
| SEMA3C  | 2.74E-07 | 0.51713335 | 0.102 | 0.048 | 0.00374137 | NSC2 | SEMA3C  |
| AKAP121 | 2.55E-07 | 0.41237882 | 0.271 | 0.178 | 0.00349252 | NSC2 | AKAP12  |
| MMD     | 2.53E-07 | 0.30483705 | 0.158 | 0.086 | 0.00346465 | NSC2 | MMD     |
| RFTN1   | 2.51E-07 | 0.26311603 | 0.126 | 0.063 | 0.00343708 | NSC2 | RFTN1   |
| DOK5    | 2.31E-07 | 0.38696746 | 0.497 | 0.397 | 0.00315846 | NSC2 | DOK5    |
| PON2    | 2.28E-07 | 0.41860999 | 0.338 | 0.242 | 0.00311331 | NSC2 | PON2    |
| SPIN1   | 2.14E-07 | 0.41168953 | 0.425 | 0.325 | 0.00293018 | NSC2 | SPIN1   |
| CD200   | 1.93E-07 | 0.31173058 | 0.143 | 0.076 | 0.00263456 | NSC2 | CD200   |
| NFIB    | 1.86E-07 | 0.33748973 | 0.761 | 0.733 | 0.00254227 | NSC2 | NFIB    |
| LONRF2  | 1.81E-07 | 0.41846974 | 0.31  | 0.211 | 0.00248135 | NSC2 | LONRF2  |
| GSAP    | 1.69E-07 | 0.44676912 | 0.377 | 0.267 | 0.0023082  | NSC2 | GSAP    |
| GAP43   | 1.65E-07 | 0.34873543 | 0.15  | 0.079 | 0.00226243 | NSC2 | GAP43   |
| SUCO    | 1.62E-07 | 0.42462238 | 0.282 | 0.188 | 0.00221369 | NSC2 | SUCO    |
| AMFR    | 1.57E-07 | 0.34469694 | 0.221 | 0.136 | 0.00214186 | NSC2 | AMFR    |
| CDKL3   | 1.49E-07 | 0.35854877 | 0.21  | 0.125 | 0.00203359 | NSC2 | CDKL3   |
| TLE4    | 1.43E-07 | 0.39560932 | 0.373 | 0.269 | 0.00195278 | NSC2 | TLE4    |
| CNN3    | 1.39E-07 | 0.70622967 | 0.401 | 0.294 | 0.00190801 | NSC2 | CNN3    |
| CTNNB1  | 1.36E-07 | 0.34409095 | 0.306 | 0.204 | 0.0018577  | NSC2 | CTNNB1  |
| MGAT51  | 1.33E-07 | 0.37619392 | 0.265 | 0.168 | 0.0018138  | NSC2 | MGAT5   |
| NDUFA5  | 1.32E-07 | 0.26100221 | 0.141 | 0.072 | 0.00180831 | NSC2 | NDUFA5  |
| TRIM23  | 1.31E-07 | 0.3538552  | 0.197 | 0.116 | 0.00178665 | NSC2 | TRIM23  |
| SPRED2  | 1.30E-07 | 0.37197957 | 0.332 | 0.227 | 0.00177352 | NSC2 | SPRED2  |
| CYC1    | 1.28E-07 | 0.28342139 | 0.126 | 0.062 | 0.00174926 | NSC2 | CYC1    |
| TAPT1   | 1.24E-07 | 0.34064226 | 0.232 | 0.141 | 0.00170095 | NSC2 | TAPT1   |
| RNF11   | 1.23E-07 | 0.3448599  | 0.184 | 0.105 | 0.00168691 | NSC2 | RNF11   |
| UGP2    | 1.18E-07 | 0.38954727 | 0.401 | 0.298 | 0.0016117  | NSC2 | UGP2    |
| LAPTM4B | 1.13E-07 | 0.25397771 | 0.145 | 0.074 | 0.00154709 | NSC2 | LAPTM4B |
| NUAK1   | 1.12E-07 | 0.3674749  | 0.236 | 0.144 | 0.0015379  | NSC2 | NUAK1   |
| DPYSL5  | 1.10E-07 | 0.31545511 | 0.241 | 0.147 | 0.00151033 | NSC2 | DPYSL5  |
| ATP5MC2 | 1.08E-07 | 0.29168354 | 0.182 | 0.103 | 0.00147964 | NSC2 | ATP5MC2 |
| MIF     | 1.07E-07 | 0.28587451 | 0.113 | 0.053 | 0.00146799 | NSC2 | MIF     |
| CSDC2   | 9.29E-08 | 0.29611675 | 0.121 | 0.059 | 0.00127012 | NSC2 | CSDC2   |
| FEM1C   | 9.22E-08 | 0.28159747 | 0.158 | 0.084 | 0.00126066 | NSC2 | FEM1C   |
| KIF5A   | 8.80E-08 | 0.30160356 | 0.145 | 0.075 | 0.00120348 | NSC2 | KIF5A   |
| GLO1    | 8.76E-08 | 0.36832813 | 0.226 | 0.136 | 0.00119804 | NSC2 | GLO1    |
| PPP1CC  | 8.73E-08 | 0.26489855 | 0.128 | 0.063 | 0.00119357 | NSC2 | PPP1CC  |
| PPP2CB  | 8.04E-08 | 0.34761786 | 0.228 | 0.138 | 0.0011001  | NSC2 | PPP2CB  |
| TSC22D1 | 7.81E-08 | 0.32495796 | 0.644 | 0.547 | 0.001068   | NSC2 | TSC22D1 |
| EIF4G1  | 7.64E-08 | 0.26415309 | 0.121 | 0.058 | 0.00104489 | NSC2 | EIF4G1  |
| OSBPL5  | 7.53E-08 | 0.35610221 | 0.163 | 0.088 | 0.00102991 | NSC2 | OSBPL5  |
| CHD7    | 6.08E-08 | 0.44822676 | 0.386 | 0.277 | 0.00083218 | NSC2 | CHD7    |
| EIF4H   | 5.46E-08 | 0.32291339 | 0.208 | 0.12  | 0.00074723 | NSC2 | EIF4H   |
| 6-Mar   | 5.20E-08 | 0.44791105 | 0.497 | 0.4   | 0.00071063 | NSC2 | 6-Mar   |
| KCNH8   | 5.18E-08 | 0.39455845 | 0.134 | 0.068 | 0.00070837 | NSC2 | KCNH8   |
| VPS29   | 4.84E-08 | 0.30792263 | 0.121 | 0.058 | 0.00066258 | NSC2 | VPS29   |

|           |          |            |       |       |            |      |           |
|-----------|----------|------------|-------|-------|------------|------|-----------|
| ACACA     | 4.84E-08 | 0.28388179 | 0.308 | 0.193 | 0.00066163 | NSC2 | ACACA     |
| TULP3     | 4.60E-08 | 0.45154076 | 0.434 | 0.326 | 0.00062885 | NSC2 | TULP3     |
| HMG3      | 4.43E-08 | 0.38831384 | 0.356 | 0.244 | 0.00060591 | NSC2 | HMG3      |
| RAPH1     | 4.31E-08 | 0.38919357 | 0.486 | 0.374 | 0.00058993 | NSC2 | RAPH1     |
| TUBB4B    | 4.26E-08 | 0.28031045 | 0.106 | 0.048 | 0.00058298 | NSC2 | TUBB4B    |
| MICAL3    | 4.20E-08 | 0.3492818  | 0.191 | 0.107 | 0.00057392 | NSC2 | MICAL3    |
| COL9A1    | 4.12E-08 | 0.40384672 | 0.262 | 0.166 | 0.0005638  | NSC2 | COL9A1    |
| FGFR2     | 4.00E-08 | 0.44098977 | 0.694 | 0.633 | 0.00054703 | NSC2 | FGFR2     |
| ATP1A1    | 3.84E-08 | 0.36228118 | 0.219 | 0.129 | 0.00052486 | NSC2 | ATP1A1    |
| ENO2      | 3.60E-08 | 0.30043898 | 0.121 | 0.058 | 0.0004927  | NSC2 | ENO2      |
| TXNL4A    | 3.24E-08 | 0.31580502 | 0.128 | 0.061 | 0.0004428  | NSC2 | TXNL4A    |
| BTBD3     | 3.23E-08 | 0.35596535 | 0.193 | 0.107 | 0.00044142 | NSC2 | BTBD3     |
| DNAJB6    | 3.19E-08 | 0.38170026 | 0.195 | 0.111 | 0.00043645 | NSC2 | DNAJB6    |
| IRS2      | 2.51E-08 | 0.2549327  | 0.102 | 0.044 | 0.0003433  | NSC2 | IRS2      |
| FBXL16    | 2.46E-08 | 0.31842432 | 0.117 | 0.054 | 0.00033604 | NSC2 | FBXL16    |
| WDR6      | 2.31E-08 | 0.28487404 | 0.104 | 0.046 | 0.00031547 | NSC2 | WDR6      |
| SLC24A5   | 2.28E-08 | 0.29315001 | 0.111 | 0.05  | 0.00031134 | NSC2 | SLC24A5   |
| TOP2B     | 2.26E-08 | 0.3864617  | 0.371 | 0.259 | 0.0003087  | NSC2 | TOP2B     |
| DAAM1     | 2.12E-08 | 0.37838106 | 0.51  | 0.394 | 0.00029018 | NSC2 | DAAM1     |
| GABARAPL1 | 2.03E-08 | 0.33988404 | 0.148 | 0.074 | 0.00027767 | NSC2 | GABARAPL1 |
| UBL3      | 1.93E-08 | 0.42470308 | 0.291 | 0.189 | 0.00026354 | NSC2 | UBL3      |
| TSPAN11   | 1.89E-08 | 0.25902423 | 0.108 | 0.048 | 0.00025905 | NSC2 | TSPAN11   |
| ZFP36L1   | 1.82E-08 | 0.39470255 | 0.456 | 0.332 | 0.00024874 | NSC2 | ZFP36L1   |
| SHROOM4   | 1.70E-08 | 0.3984779  | 0.148 | 0.074 | 0.0002332  | NSC2 | SHROOM4   |
| OGFRL1    | 1.62E-08 | 0.34423899 | 0.234 | 0.138 | 0.00022149 | NSC2 | OGFRL1    |
| SCG5      | 1.62E-08 | 0.309665   | 0.171 | 0.091 | 0.00022107 | NSC2 | SCG5      |
| USP44     | 1.59E-08 | 0.28763427 | 0.121 | 0.056 | 0.0002176  | NSC2 | USP44     |
| EIF2B1    | 1.38E-08 | 0.31025692 | 0.152 | 0.076 | 0.0001882  | NSC2 | EIF2B1    |
| FZD3      | 1.24E-08 | 0.44353172 | 0.289 | 0.186 | 0.00016955 | NSC2 | FZD3      |
| MPPED2    | 1.18E-08 | 0.48792631 | 0.497 | 0.398 | 0.00016148 | NSC2 | MPPED2    |
| FAM162A   | 1.17E-08 | 0.27337659 | 0.15  | 0.075 | 0.00015963 | NSC2 | FAM162A   |
| ATP1B1    | 1.16E-08 | 0.44826667 | 0.443 | 0.333 | 0.00015851 | NSC2 | ATP1B1    |
| FAM184B   | 1.13E-08 | 0.40981181 | 0.215 | 0.123 | 0.00015497 | NSC2 | FAM184B   |
| TOR1AIP2  | 1.10E-08 | 0.25049094 | 0.108 | 0.047 | 0.00015107 | NSC2 | TOR1AIP2  |
| SYNRG     | 1.10E-08 | 0.28591589 | 0.174 | 0.09  | 0.00015054 | NSC2 | SYNRG     |
| ARRDC3    | 1.04E-08 | 0.30908894 | 0.113 | 0.05  | 0.00014175 | NSC2 | ARRDC3    |
| PALLD     | 9.77E-09 | 0.40922486 | 0.523 | 0.401 | 0.00013361 | NSC2 | PALLD     |
| RTN4      | 9.62E-09 | 0.36089249 | 0.685 | 0.632 | 0.00013154 | NSC2 | RTN4      |
| DCLK1     | 9.25E-09 | 0.28445248 | 0.939 | 0.881 | 0.0001265  | NSC2 | DCLK1     |
| SAMD4A    | 8.52E-09 | 0.55899591 | 0.516 | 0.41  | 0.0001165  | NSC2 | SAMD4A    |
| CNOT6L    | 7.98E-09 | 0.31296876 | 0.134 | 0.064 | 0.00010911 | NSC2 | CNOT6L    |
| LDB2      | 7.97E-09 | 0.48227078 | 0.514 | 0.405 | 0.00010896 | NSC2 | LDB2      |
| ISCA1     | 6.94E-09 | 0.35572138 | 0.143 | 0.07  | 9.49E-05   | NSC2 | ISCA1     |
| IMPAD1    | 6.33E-09 | 0.34625838 | 0.206 | 0.114 | 8.66E-05   | NSC2 | IMPAD1    |
| ZEB1      | 6.31E-09 | 0.37530151 | 0.679 | 0.598 | 8.63E-05   | NSC2 | ZEB1      |
| CLTA      | 5.77E-09 | 0.29761863 | 0.145 | 0.071 | 7.89E-05   | NSC2 | CLTA      |

|          |          |            |       |       |          |      |          |
|----------|----------|------------|-------|-------|----------|------|----------|
| GSDME    | 5.36E-09 | 0.36866776 | 0.139 | 0.067 | 7.33E-05 | NSC2 | GSDME    |
| CALY     | 5.31E-09 | 0.35084865 | 0.13  | 0.061 | 7.26E-05 | NSC2 | CALY     |
| ACTR2    | 5.18E-09 | 0.42882993 | 0.315 | 0.204 | 7.08E-05 | NSC2 | ACTR2    |
| CD164    | 5.17E-09 | 0.27923659 | 0.124 | 0.056 | 7.07E-05 | NSC2 | CD164    |
| RPS7     | 4.71E-09 | 0.27130393 | 0.108 | 0.046 | 6.44E-05 | NSC2 | RPS7     |
| CHGB     | 4.65E-09 | 0.39102349 | 0.18  | 0.095 | 6.35E-05 | NSC2 | CHGB     |
| SORT1    | 4.62E-09 | 0.44365703 | 0.286 | 0.177 | 6.31E-05 | NSC2 | SORT1    |
| ATP6AP2  | 4.57E-09 | 0.26904905 | 0.156 | 0.077 | 6.25E-05 | NSC2 | ATP6AP2  |
| VDAC3    | 4.52E-09 | 0.30473457 | 0.176 | 0.09  | 6.18E-05 | NSC2 | VDAC3    |
| SEMA3A   | 4.15E-09 | 0.28382685 | 0.156 | 0.076 | 5.68E-05 | NSC2 | SEMA3A   |
| CD9      | 3.92E-09 | 0.30712241 | 0.102 | 0.042 | 5.36E-05 | NSC2 | CD9      |
| CLU      | 3.82E-09 | 0.50000079 | 0.709 | 0.655 | 5.23E-05 | NSC2 | CLU      |
| SNU13    | 3.82E-09 | 0.34277362 | 0.154 | 0.076 | 5.22E-05 | NSC2 | SNU13    |
| SRI      | 3.70E-09 | 0.35209056 | 0.204 | 0.112 | 5.06E-05 | NSC2 | SRI      |
| TMEM184B | 3.48E-09 | 0.40621656 | 0.273 | 0.166 | 4.76E-05 | NSC2 | TMEM184B |
| PJA2     | 3.36E-09 | 0.45067838 | 0.323 | 0.212 | 4.59E-05 | NSC2 | PJA2     |
| TIAM2    | 3.32E-09 | 0.39515605 | 0.215 | 0.12  | 4.54E-05 | NSC2 | TIAM2    |
| CCNI     | 3.30E-09 | 0.39019019 | 0.306 | 0.195 | 4.52E-05 | NSC2 | CCNI     |
| CMAS     | 3.26E-09 | 0.2927363  | 0.169 | 0.086 | 4.45E-05 | NSC2 | CMAS     |
| SAP18    | 3.21E-09 | 0.33767666 | 0.13  | 0.06  | 4.40E-05 | NSC2 | SAP18    |
| CSTB     | 3.12E-09 | 0.31654915 | 0.148 | 0.071 | 4.27E-05 | NSC2 | CSTB     |
| SLC9A6   | 2.76E-09 | 0.41251781 | 0.232 | 0.135 | 3.78E-05 | NSC2 | SLC9A6   |
| VEZF1    | 2.72E-09 | 0.36857531 | 0.21  | 0.116 | 3.72E-05 | NSC2 | VEZF1    |
| RCHY1    | 2.72E-09 | 0.37416327 | 0.356 | 0.233 | 3.72E-05 | NSC2 | RCHY1    |
| EPHA4    | 2.66E-09 | 0.47460407 | 0.421 | 0.3   | 3.63E-05 | NSC2 | EPHA4    |
| RPS23    | 2.52E-09 | 0.31106128 | 0.108 | 0.046 | 3.45E-05 | NSC2 | RPS23    |
| SPCS2    | 2.46E-09 | 0.34571171 | 0.193 | 0.102 | 3.36E-05 | NSC2 | SPCS2    |
| DDX6     | 2.40E-09 | 0.42904647 | 0.308 | 0.196 | 3.28E-05 | NSC2 | DDX6     |
| PKP2     | 2.28E-09 | 0.46786791 | 0.206 | 0.114 | 3.11E-05 | NSC2 | PKP2     |
| FYTTD1   | 2.23E-09 | 0.39863005 | 0.182 | 0.096 | 3.05E-05 | NSC2 | FYTTD1   |
| PRDX5    | 2.03E-09 | 0.29871425 | 0.117 | 0.051 | 2.77E-05 | NSC2 | PRDX5    |
| JPT1     | 1.99E-09 | 0.33636697 | 0.126 | 0.057 | 2.72E-05 | NSC2 | JPT1     |
| SERINC3  | 1.95E-09 | 0.44982329 | 0.239 | 0.14  | 2.66E-05 | NSC2 | SERINC3  |
| TSPAN7   | 1.79E-09 | 0.42398557 | 0.772 | 0.727 | 2.45E-05 | NSC2 | TSPAN7   |
| EMX2     | 1.64E-09 | 0.31879625 | 0.15  | 0.072 | 2.25E-05 | NSC2 | EMX2     |
| CISD2    | 1.56E-09 | 0.25108143 | 0.102 | 0.041 | 2.14E-05 | NSC2 | CISD2    |
| BROX     | 1.55E-09 | 0.29943871 | 0.111 | 0.046 | 2.12E-05 | NSC2 | BROX     |
| RAB21    | 1.37E-09 | 0.4300504  | 0.232 | 0.133 | 1.88E-05 | NSC2 | RAB21    |
| SRSF9    | 1.31E-09 | 0.31032664 | 0.139 | 0.064 | 1.80E-05 | NSC2 | SRSF9    |
| UNC50    | 1.20E-09 | 0.27525251 | 0.113 | 0.047 | 1.65E-05 | NSC2 | UNC50    |
| SELENOT  | 1.19E-09 | 0.41932792 | 0.18  | 0.093 | 1.63E-05 | NSC2 | SELENOT  |
| LARP1    | 1.09E-09 | 0.36566419 | 0.273 | 0.158 | 1.49E-05 | NSC2 | LARP1    |
| FKBP8    | 1.08E-09 | 0.37239426 | 0.169 | 0.084 | 1.48E-05 | NSC2 | FKBP8    |
| RAB3A    | 9.90E-10 | 0.32465468 | 0.121 | 0.053 | 1.35E-05 | NSC2 | RAB3A    |
| COX8A    | 9.87E-10 | 0.39476278 | 0.213 | 0.116 | 1.35E-05 | NSC2 | COX8A    |
| ZFP36L2  | 8.95E-10 | 0.38568964 | 0.182 | 0.094 | 1.22E-05 | NSC2 | ZFP36L2  |

|          |          |            |       |       |          |      |          |
|----------|----------|------------|-------|-------|----------|------|----------|
| CHERP    | 8.64E-10 | 0.26199788 | 0.106 | 0.043 | 1.18E-05 | NSC2 | CHERP    |
| SUMO1    | 8.37E-10 | 0.38899258 | 0.187 | 0.097 | 1.14E-05 | NSC2 | SUMO1    |
| FIS1     | 8.02E-10 | 0.33228329 | 0.137 | 0.062 | 1.10E-05 | NSC2 | FIS1     |
| LRPAP1   | 7.28E-10 | 0.30088181 | 0.154 | 0.073 | 9.95E-06 | NSC2 | LRPAP1   |
| GNAI1    | 7.25E-10 | 0.26350015 | 0.13  | 0.057 | 9.92E-06 | NSC2 | GNAI1    |
| BMPR1B   | 6.81E-10 | 0.44356615 | 0.525 | 0.389 | 9.32E-06 | NSC2 | BMPR1B   |
| CERS6    | 6.33E-10 | 0.35238291 | 0.202 | 0.106 | 8.66E-06 | NSC2 | CERS6    |
| ARHGEF33 | 6.30E-10 | 0.42255293 | 0.189 | 0.099 | 8.62E-06 | NSC2 | ARHGEF33 |
| EPB41L4A | 6.15E-10 | 0.43232964 | 0.217 | 0.12  | 8.41E-06 | NSC2 | EPB41L4A |
| RTN3     | 5.82E-10 | 0.39764818 | 0.636 | 0.518 | 7.96E-06 | NSC2 | RTN3     |
| FAU      | 5.71E-10 | 0.28021082 | 0.104 | 0.041 | 7.81E-06 | NSC2 | FAU      |
| CNRIP1   | 5.49E-10 | 0.39435089 | 0.178 | 0.09  | 7.51E-06 | NSC2 | CNRIP1   |
| PTP4A2   | 5.37E-10 | 0.39496165 | 0.262 | 0.152 | 7.35E-06 | NSC2 | PTP4A2   |
| SEZ6L    | 5.34E-10 | 0.38055494 | 0.189 | 0.097 | 7.30E-06 | NSC2 | SEZ6L    |
| AK6      | 5.07E-10 | 0.35387683 | 0.158 | 0.076 | 6.93E-06 | NSC2 | AK6      |
| FUBP3    | 4.83E-10 | 0.34745887 | 0.193 | 0.101 | 6.61E-06 | NSC2 | FUBP3    |
| SCOC     | 4.48E-10 | 0.25377164 | 0.119 | 0.05  | 6.13E-06 | NSC2 | SCOC     |
| ARL8A    | 4.45E-10 | 0.38354844 | 0.189 | 0.098 | 6.09E-06 | NSC2 | ARL8A    |
| CA8      | 4.41E-10 | 0.52027443 | 0.336 | 0.219 | 6.03E-06 | NSC2 | CA8      |
| NTNG2    | 3.95E-10 | 0.40787609 | 0.117 | 0.05  | 5.40E-06 | NSC2 | NTNG2    |
| STARD13  | 3.79E-10 | 0.51083786 | 0.308 | 0.195 | 5.18E-06 | NSC2 | STARD13  |
| COPS8    | 3.55E-10 | 0.29238107 | 0.121 | 0.051 | 4.85E-06 | NSC2 | COPS8    |
| MDH1     | 3.45E-10 | 0.3680755  | 0.299 | 0.179 | 4.72E-06 | NSC2 | MDH1     |
| KIAA1143 | 3.40E-10 | 0.30824465 | 0.102 | 0.04  | 4.65E-06 | NSC2 | KIAA1143 |
| ATP6V0B  | 2.92E-10 | 0.32449891 | 0.15  | 0.069 | 3.99E-06 | NSC2 | ATP6V0B  |
| CLDND1   | 2.73E-10 | 0.32428537 | 0.128 | 0.055 | 3.73E-06 | NSC2 | CLDND1   |
| PTGES3   | 2.65E-10 | 0.45232977 | 0.306 | 0.189 | 3.62E-06 | NSC2 | PTGES3   |
| SARAF    | 2.50E-10 | 0.32614043 | 0.106 | 0.042 | 3.43E-06 | NSC2 | SARAF    |
| CLCN3    | 2.47E-10 | 0.43331355 | 0.341 | 0.214 | 3.38E-06 | NSC2 | CLCN3    |
| IREB2    | 2.42E-10 | 0.38045129 | 0.226 | 0.122 | 3.31E-06 | NSC2 | IREB2    |
| BCLAF1   | 2.20E-10 | 0.42148492 | 0.369 | 0.238 | 3.01E-06 | NSC2 | BCLAF1   |
| PNMA8A   | 1.50E-10 | 0.28720408 | 0.115 | 0.046 | 2.06E-06 | NSC2 | PNMA8A   |
| CACHD1   | 1.47E-10 | 0.50233021 | 0.529 | 0.411 | 2.01E-06 | NSC2 | CACHD1   |
| SPATA6   | 1.39E-10 | 0.49148933 | 0.399 | 0.27  | 1.90E-06 | NSC2 | SPATA6   |
| NUCKS1   | 1.35E-10 | 0.48020669 | 0.423 | 0.296 | 1.85E-06 | NSC2 | NUCKS1   |
| SNCAIP   | 1.20E-10 | 0.38316803 | 0.165 | 0.078 | 1.64E-06 | NSC2 | SNCAIP   |
| ATP6V1G1 | 1.16E-10 | 0.27460427 | 0.108 | 0.042 | 1.58E-06 | NSC2 | ATP6V1G1 |
| VAMP2    | 1.14E-10 | 0.38181442 | 0.145 | 0.065 | 1.56E-06 | NSC2 | VAMP2    |
| PTPN12   | 1.07E-10 | 0.42527425 | 0.358 | 0.229 | 1.46E-06 | NSC2 | PTPN12   |
| FAM107B  | 1.01E-10 | 0.29661929 | 0.113 | 0.045 | 1.38E-06 | NSC2 | FAM107B  |
| TMEM108  | 9.11E-11 | 0.54072924 | 0.302 | 0.183 | 1.25E-06 | NSC2 | TMEM108  |
| SEZ6L2   | 8.24E-11 | 0.32726906 | 0.137 | 0.059 | 1.13E-06 | NSC2 | SEZ6L2   |
| DYNLRB1  | 8.04E-11 | 0.41295335 | 0.2   | 0.102 | 1.10E-06 | NSC2 | DYNLRB1  |
| PHPT1    | 6.78E-11 | 0.31325907 | 0.141 | 0.062 | 9.27E-07 | NSC2 | PHPT1    |
| SALL1    | 6.68E-11 | 0.34879273 | 0.117 | 0.047 | 9.14E-07 | NSC2 | SALL1    |
| TMEM131L | 5.68E-11 | 0.33051471 | 0.117 | 0.047 | 7.77E-07 | NSC2 | TMEM131L |

|           |          |            |       |       |          |      |           |
|-----------|----------|------------|-------|-------|----------|------|-----------|
| TRIR      | 5.01E-11 | 0.37250497 | 0.184 | 0.091 | 6.86E-07 | NSC2 | TRIR      |
| COX1      | 4.85E-11 | 0.41874105 | 0.239 | 0.129 | 6.64E-07 | NSC2 | COX1      |
| POMP      | 4.00E-11 | 0.30043503 | 0.124 | 0.05  | 5.47E-07 | NSC2 | POMP      |
| PLK2      | 3.97E-11 | 0.27674214 | 0.108 | 0.041 | 5.44E-07 | NSC2 | PLK2      |
| HBP1      | 3.69E-11 | 0.43110161 | 0.267 | 0.153 | 5.04E-07 | NSC2 | HBP1      |
| WWTR1     | 3.48E-11 | 0.46026472 | 0.195 | 0.098 | 4.77E-07 | NSC2 | WWTR1     |
| C1QL2     | 3.32E-11 | 0.42549908 | 0.18  | 0.088 | 4.55E-07 | NSC2 | C1QL2     |
| LMO4      | 3.29E-11 | 0.40134649 | 0.234 | 0.124 | 4.50E-07 | NSC2 | LMO4      |
| PAN3      | 2.61E-11 | 0.50918195 | 0.36  | 0.232 | 3.57E-07 | NSC2 | PAN3      |
| NR2E1     | 2.56E-11 | 0.38579326 | 0.184 | 0.09  | 3.50E-07 | NSC2 | NR2E1     |
| CCNG2     | 2.41E-11 | 0.36345274 | 0.13  | 0.054 | 3.29E-07 | NSC2 | CCNG2     |
| N4BP2     | 2.36E-11 | 0.43558506 | 0.258 | 0.143 | 3.22E-07 | NSC2 | N4BP2     |
| CREBZF    | 1.39E-11 | 0.27521512 | 0.111 | 0.041 | 1.90E-07 | NSC2 | CREBZF    |
| HNRNPA2B  | 1.36E-11 | 0.44257447 | 0.623 | 0.499 | 1.86E-07 | NSC2 | HNRNPA2B1 |
| ERH       | 1.31E-11 | 0.37315125 | 0.141 | 0.06  | 1.79E-07 | NSC2 | ERH       |
| TMEM30A   | 1.25E-11 | 0.42366264 | 0.174 | 0.082 | 1.72E-07 | NSC2 | TMEM30A   |
| VSNL1     | 1.00E-11 | 0.38487116 | 0.191 | 0.091 | 1.37E-07 | NSC2 | VSNL1     |
| C14orf132 | 9.75E-12 | 0.29699587 | 0.13  | 0.053 | 1.33E-07 | NSC2 | C14orf132 |
| DSTN      | 8.12E-12 | 0.46704143 | 0.226 | 0.118 | 1.11E-07 | NSC2 | DSTN      |
| AGPAT5    | 6.31E-12 | 0.55135758 | 0.458 | 0.328 | 8.63E-08 | NSC2 | AGPAT5    |
| TRIO      | 6.16E-12 | 0.47077809 | 0.69  | 0.599 | 8.43E-08 | NSC2 | TRIO      |
| NCDN      | 6.00E-12 | 0.36657195 | 0.169 | 0.077 | 8.21E-08 | NSC2 | NCDN      |
| LIN7C     | 5.90E-12 | 0.28065772 | 0.102 | 0.036 | 8.07E-08 | NSC2 | LIN7C     |
| KLHDC3    | 5.20E-12 | 0.31629899 | 0.111 | 0.041 | 7.12E-08 | NSC2 | KLHDC3    |
| MLC1      | 4.96E-12 | 0.55043977 | 0.521 | 0.388 | 6.78E-08 | NSC2 | MLC1      |
| HOPX      | 4.46E-12 | 0.59436163 | 0.534 | 0.412 | 6.10E-08 | NSC2 | HOPX      |
| TMF1      | 3.98E-12 | 0.31143049 | 0.126 | 0.049 | 5.44E-08 | NSC2 | TMF1      |
| SYT4      | 3.93E-12 | 0.43334315 | 0.132 | 0.054 | 5.38E-08 | NSC2 | SYT4      |
| APP       | 3.63E-12 | 0.45590039 | 0.748 | 0.683 | 4.96E-08 | NSC2 | APP       |
| APPL1     | 3.23E-12 | 0.35861679 | 0.141 | 0.058 | 4.42E-08 | NSC2 | APPL1     |
| VAPA      | 2.79E-12 | 0.38553627 | 0.176 | 0.08  | 3.82E-08 | NSC2 | VAPA      |
| SCG3      | 2.70E-12 | 0.50088817 | 0.347 | 0.213 | 3.70E-08 | NSC2 | SCG3      |
| CALR      | 2.53E-12 | 0.29282932 | 0.121 | 0.046 | 3.47E-08 | NSC2 | CALR      |
| ATP5IF1   | 2.46E-12 | 0.34667252 | 0.145 | 0.06  | 3.37E-08 | NSC2 | ATP5IF1   |
| DDOST     | 2.43E-12 | 0.31262389 | 0.124 | 0.047 | 3.32E-08 | NSC2 | DDOST     |
| UCHL1     | 2.23E-12 | 0.48397278 | 0.295 | 0.165 | 3.06E-08 | NSC2 | UCHL1     |
| TXNIP     | 2.04E-12 | 0.46972068 | 0.43  | 0.28  | 2.79E-08 | NSC2 | TXNIP     |
| CST3      | 1.84E-12 | 0.56972484 | 0.395 | 0.261 | 2.51E-08 | NSC2 | CST3      |
| BEX2      | 1.77E-12 | 0.37989803 | 0.161 | 0.07  | 2.42E-08 | NSC2 | BEX2      |
| USP7      | 1.58E-12 | 0.35291077 | 0.156 | 0.067 | 2.17E-08 | NSC2 | USP7      |
| CTSD      | 1.55E-12 | 0.42693119 | 0.193 | 0.091 | 2.12E-08 | NSC2 | CTSD      |
| CFAP54    | 1.33E-12 | 0.43850727 | 0.184 | 0.085 | 1.82E-08 | NSC2 | CFAP54    |
| PCP4      | 1.30E-12 | 0.35222017 | 0.141 | 0.057 | 1.77E-08 | NSC2 | PCP4      |
| RTN1      | 8.84E-13 | 0.48471172 | 0.603 | 0.47  | 1.21E-08 | NSC2 | RTN1      |
| SMYD2     | 7.87E-13 | 0.39173193 | 0.115 | 0.042 | 1.08E-08 | NSC2 | SMYD2     |
| PRDX2     | 7.04E-13 | 0.29999668 | 0.108 | 0.038 | 9.63E-09 | NSC2 | PRDX2     |

|          |          |            |       |       |          |      |          |
|----------|----------|------------|-------|-------|----------|------|----------|
| SRSF6    | 7.03E-13 | 0.34547017 | 0.139 | 0.055 | 9.61E-09 | NSC2 | SRSF6    |
| CDK6     | 6.50E-13 | 0.60764062 | 0.249 | 0.134 | 8.89E-09 | NSC2 | CDK6     |
| SSBP4    | 4.82E-13 | 0.33045465 | 0.121 | 0.045 | 6.59E-09 | NSC2 | SSBP4    |
| SNAP25   | 4.75E-13 | 0.48755609 | 0.575 | 0.447 | 6.50E-09 | NSC2 | SNAP25   |
| ARHGEF28 | 4.56E-13 | 0.404474   | 0.145 | 0.059 | 6.23E-09 | NSC2 | ARHGEF28 |
| ARHGAP5  | 4.46E-13 | 0.52927564 | 0.681 | 0.578 | 6.09E-09 | NSC2 | ARHGAP5  |
| TERF2IP  | 3.93E-13 | 0.47203488 | 0.226 | 0.112 | 5.38E-09 | NSC2 | TERF2IP  |
| TMBIM6   | 2.98E-13 | 0.50717603 | 0.315 | 0.177 | 4.07E-09 | NSC2 | TMBIM6   |
| DCAF10   | 2.96E-13 | 0.49812386 | 0.278 | 0.151 | 4.04E-09 | NSC2 | DCAF10   |
| STMN3    | 2.95E-13 | 0.44409388 | 0.176 | 0.078 | 4.04E-09 | NSC2 | STMN3    |
| SUB1     | 2.63E-13 | 0.48931942 | 0.262 | 0.14  | 3.60E-09 | NSC2 | SUB1     |
| SRSF10   | 2.20E-13 | 0.38352373 | 0.15  | 0.061 | 3.02E-09 | NSC2 | SRSF10   |
| MARCKSL1 | 2.15E-13 | 0.37678616 | 0.13  | 0.05  | 2.94E-09 | NSC2 | MARCKSL1 |
| CTTNBP2  | 2.06E-13 | 0.5223127  | 0.453 | 0.303 | 2.82E-09 | NSC2 | CTTNBP2  |
| PSMB1    | 1.95E-13 | 0.35925498 | 0.121 | 0.044 | 2.67E-09 | NSC2 | PSMB1    |
| TUBB4A   | 1.94E-13 | 0.43737416 | 0.163 | 0.068 | 2.66E-09 | NSC2 | TUBB4A   |
| GPR37L1  | 1.93E-13 | 0.4886868  | 0.262 | 0.137 | 2.64E-09 | NSC2 | GPR37L1  |
| HNRNPC   | 1.92E-13 | 0.50331498 | 0.377 | 0.227 | 2.63E-09 | NSC2 | HNRNPC   |
| EIF4A2   | 1.85E-13 | 0.51430533 | 0.336 | 0.196 | 2.53E-09 | NSC2 | EIF4A2   |
| REST     | 1.45E-13 | 0.41268487 | 0.176 | 0.076 | 1.98E-09 | NSC2 | REST     |
| PUM2     | 1.39E-13 | 0.51579151 | 0.367 | 0.225 | 1.90E-09 | NSC2 | PUM2     |
| SRSF11   | 1.22E-13 | 0.4662975  | 0.286 | 0.153 | 1.66E-09 | NSC2 | SRSF11   |
| RPLP0    | 1.15E-13 | 0.39480231 | 0.143 | 0.056 | 1.57E-09 | NSC2 | RPLP0    |
| GNAO1    | 1.14E-13 | 0.50455214 | 0.605 | 0.453 | 1.55E-09 | NSC2 | GNAO1    |
| SRPX     | 1.11E-13 | 0.55736506 | 0.234 | 0.116 | 1.52E-09 | NSC2 | SRPX     |
| IL6ST    | 1.06E-13 | 0.49304346 | 0.273 | 0.145 | 1.46E-09 | NSC2 | IL6ST    |
| HHIP     | 9.81E-14 | 0.60112268 | 0.167 | 0.073 | 1.34E-09 | NSC2 | HHIP     |
| C1QTNF4  | 9.68E-14 | 0.38229837 | 0.176 | 0.076 | 1.32E-09 | NSC2 | C1QTNF4  |
| RING1    | 9.42E-14 | 0.28993313 | 0.108 | 0.036 | 1.29E-09 | NSC2 | RING1    |
| CASC3    | 8.06E-14 | 0.39892717 | 0.191 | 0.086 | 1.10E-09 | NSC2 | CASC3    |
| FKBP1A   | 6.86E-14 | 0.45027571 | 0.189 | 0.084 | 9.38E-10 | NSC2 | FKBP1A   |
| RAN      | 6.02E-14 | 0.4279285  | 0.134 | 0.051 | 8.23E-10 | NSC2 | RAN      |
| PDE5A    | 4.34E-14 | 0.59215972 | 0.28  | 0.151 | 5.94E-10 | NSC2 | PDE5A    |
| PGK1     | 4.05E-14 | 0.38721528 | 0.141 | 0.054 | 5.55E-10 | NSC2 | PGK1     |
| PAQR4    | 3.89E-14 | 0.36138322 | 0.113 | 0.038 | 5.32E-10 | NSC2 | PAQR4    |
| DDR1     | 3.76E-14 | 0.54323868 | 0.312 | 0.175 | 5.14E-10 | NSC2 | DDR1     |
| FGFR31   | 3.40E-14 | 0.46364591 | 0.401 | 0.24  | 4.65E-10 | NSC2 | FGFR3    |
| HPCA     | 2.62E-14 | 0.37652764 | 0.128 | 0.046 | 3.59E-10 | NSC2 | HPCA     |
| IFIT1    | 2.58E-14 | 0.32823247 | 0.108 | 0.036 | 3.52E-10 | NSC2 | IFIT1    |
| DVL3     | 2.44E-14 | 0.3070507  | 0.113 | 0.038 | 3.34E-10 | NSC2 | DVL3     |
| KIF1B1   | 2.12E-14 | 0.30766204 | 0.638 | 0.388 | 2.90E-10 | NSC2 | KIF1B    |
| WSCD1    | 2.10E-14 | 0.50868286 | 0.23  | 0.111 | 2.87E-10 | NSC2 | WSCD1    |
| PSAP     | 1.31E-14 | 0.61682544 | 0.453 | 0.309 | 1.79E-10 | NSC2 | PSAP     |
| ARF5     | 1.19E-14 | 0.4362677  | 0.178 | 0.076 | 1.62E-10 | NSC2 | ARF5     |
| SPINT2   | 1.11E-14 | 0.33553552 | 0.13  | 0.046 | 1.52E-10 | NSC2 | SPINT2   |
| CD81     | 9.96E-15 | 0.5217983  | 0.486 | 0.329 | 1.36E-10 | NSC2 | CD81     |

|         |          |            |       |       |          |      |         |
|---------|----------|------------|-------|-------|----------|------|---------|
| GPM6B   | 8.30E-15 | 0.44097579 | 0.796 | 0.702 | 1.14E-10 | NSC2 | GPM6B   |
| CCDC80  | 8.28E-15 | 0.56547965 | 0.215 | 0.101 | 1.13E-10 | NSC2 | CCDC80  |
| CKB     | 6.77E-15 | 0.67580628 | 0.592 | 0.463 | 9.26E-11 | NSC2 | CKB     |
| CCNH    | 6.72E-15 | 0.57451806 | 0.304 | 0.166 | 9.19E-11 | NSC2 | CCNH    |
| NPDC1   | 6.29E-15 | 0.51490028 | 0.256 | 0.129 | 8.61E-11 | NSC2 | NPDC1   |
| PLP1    | 6.26E-15 | 0.6204825  | 0.44  | 0.286 | 8.57E-11 | NSC2 | PLP1    |
| NEFL    | 6.15E-15 | 0.3942935  | 0.137 | 0.05  | 8.42E-11 | NSC2 | NEFL    |
| DSCAM   | 5.36E-15 | 0.67072559 | 0.529 | 0.379 | 7.33E-11 | NSC2 | DSCAM   |
| IGF1R   | 5.22E-15 | 0.63308176 | 0.466 | 0.309 | 7.15E-11 | NSC2 | IGF1R   |
| BSCL2   | 5.09E-15 | 0.47176624 | 0.252 | 0.123 | 6.97E-11 | NSC2 | BSCL2   |
| LAMA4   | 4.87E-15 | 0.51208308 | 0.221 | 0.102 | 6.67E-11 | NSC2 | LAMA4   |
| DACH1   | 4.36E-15 | 0.54414074 | 0.169 | 0.069 | 5.97E-11 | NSC2 | DACH1   |
| ZHX3    | 3.77E-15 | 0.47017251 | 0.831 | 0.755 | 5.15E-11 | NSC2 | ZHX3    |
| DCTN3   | 2.14E-15 | 0.33453087 | 0.121 | 0.041 | 2.93E-11 | NSC2 | DCTN3   |
| ATP5F1A | 2.11E-15 | 0.44469349 | 0.182 | 0.076 | 2.88E-11 | NSC2 | ATP5F1A |
| PTCH1   | 1.85E-15 | 0.84039177 | 0.564 | 0.428 | 2.53E-11 | NSC2 | PTCH1   |
| RHOJ    | 1.05E-15 | 0.49033598 | 0.191 | 0.08  | 1.43E-11 | NSC2 | RHOJ    |
| LMO2    | 1.00E-15 | 0.67364255 | 0.315 | 0.173 | 1.37E-11 | NSC2 | LMO2    |
| TUBA4A  | 7.27E-16 | 0.38098317 | 0.134 | 0.047 | 9.95E-12 | NSC2 | TUBA4A  |
| SEMA5B  | 6.69E-16 | 0.47521424 | 0.15  | 0.056 | 9.15E-12 | NSC2 | SEMA5B  |
| AKT3    | 5.81E-16 | 0.4772657  | 0.796 | 0.697 | 7.94E-12 | NSC2 | AKT3    |
| RPS9    | 4.78E-16 | 0.47720515 | 0.195 | 0.082 | 6.54E-12 | NSC2 | RPS9    |
| SYT14   | 4.55E-16 | 0.73339774 | 0.616 | 0.488 | 6.22E-12 | NSC2 | SYT14   |
| HNRNPH3 | 3.10E-16 | 0.38586068 | 0.158 | 0.06  | 4.24E-12 | NSC2 | HNRNPH3 |
| CALD1   | 2.51E-16 | 0.53700803 | 0.419 | 0.25  | 3.44E-12 | NSC2 | CALD1   |
| RNASEK  | 2.38E-16 | 0.43581522 | 0.176 | 0.07  | 3.26E-12 | NSC2 | RNASEK  |
| YWHAG   | 1.75E-16 | 0.5318436  | 0.317 | 0.165 | 2.40E-12 | NSC2 | YWHAG   |
| CHRD1   | 1.68E-16 | 0.50066867 | 0.178 | 0.071 | 2.29E-12 | NSC2 | CHRD1   |
| RPS3    | 1.64E-16 | 0.46721104 | 0.18  | 0.073 | 2.25E-12 | NSC2 | RPS3    |
| CDKN1B  | 1.52E-16 | 0.43415721 | 0.126 | 0.042 | 2.08E-12 | NSC2 | CDKN1B  |
| ANXA5   | 1.14E-16 | 0.42511523 | 0.167 | 0.064 | 1.57E-12 | NSC2 | ANXA5   |
| EIF4G2  | 1.09E-16 | 0.54258698 | 0.271 | 0.134 | 1.49E-12 | NSC2 | EIF4G2  |
| FEM1B   | 1.01E-16 | 0.43420015 | 0.176 | 0.069 | 1.38E-12 | NSC2 | FEM1B   |
| DIP2B   | 7.68E-17 | 0.5256515  | 0.458 | 0.272 | 1.05E-12 | NSC2 | DIP2B   |
| PDLIM3  | 7.32E-17 | 0.60726778 | 0.345 | 0.194 | 1.00E-12 | NSC2 | PDLIM3  |
| PSMD2   | 7.26E-17 | 0.39675505 | 0.132 | 0.044 | 9.93E-13 | NSC2 | PSMD2   |
| CREB5   | 7.15E-17 | 0.65511601 | 0.243 | 0.113 | 9.78E-13 | NSC2 | CREB5   |
| CD58    | 7.10E-17 | 0.45654869 | 0.156 | 0.058 | 9.71E-13 | NSC2 | CD58    |
| RSRC2   | 6.05E-17 | 0.47036583 | 0.195 | 0.08  | 8.28E-13 | NSC2 | RSRC2   |
| OLFM1   | 3.56E-17 | 0.5485172  | 0.312 | 0.159 | 4.87E-13 | NSC2 | OLFM1   |
| CELF2   | 3.45E-17 | 0.42703456 | 0.672 | 0.415 | 4.72E-13 | NSC2 | CELF2   |
| SLC25A3 | 3.18E-17 | 0.41786965 | 0.154 | 0.055 | 4.35E-13 | NSC2 | SLC25A3 |
| TBL1XR1 | 2.32E-17 | 0.65824624 | 0.484 | 0.318 | 3.17E-13 | NSC2 | TBL1XR1 |
| CPE     | 2.27E-17 | 0.58411073 | 0.905 | 0.911 | 3.11E-13 | NSC2 | CPE     |
| MAP1B   | 2.20E-17 | 0.6578021  | 0.586 | 0.442 | 3.01E-13 | NSC2 | MAP1B   |
| SMAD9   | 2.10E-17 | 0.53330554 | 0.299 | 0.15  | 2.88E-13 | NSC2 | SMAD9   |



|          |          |            |       |       |          |      |          |
|----------|----------|------------|-------|-------|----------|------|----------|
| NHS      | 2.00E-17 | 0.65072503 | 0.252 | 0.118 | 2.73E-13 | NSC2 | NHS      |
| UBE4A    | 1.87E-17 | 0.46531392 | 0.197 | 0.08  | 2.56E-13 | NSC2 | UBE4A    |
| TMEM132B | 1.78E-17 | 0.74220557 | 0.625 | 0.504 | 2.44E-13 | NSC2 | TMEM132B |
| PPIG     | 1.39E-17 | 0.48841908 | 0.245 | 0.111 | 1.91E-13 | NSC2 | PPIG     |
| DKK3     | 1.03E-17 | 0.57363627 | 0.325 | 0.171 | 1.41E-13 | NSC2 | DKK3     |
| SRSF3    | 9.00E-18 | 0.38492397 | 0.132 | 0.043 | 1.23E-13 | NSC2 | SRSF3    |
| SLC22A17 | 7.86E-18 | 0.64721699 | 0.427 | 0.261 | 1.08E-13 | NSC2 | SLC22A17 |
| ZBTB18   | 7.46E-18 | 0.609909   | 0.252 | 0.117 | 1.02E-13 | NSC2 | ZBTB18   |
| TSPAN18  | 7.22E-18 | 0.49886276 | 0.195 | 0.079 | 9.88E-14 | NSC2 | TSPAN18  |
| YWHAH    | 7.05E-18 | 0.63545617 | 0.275 | 0.132 | 9.64E-14 | NSC2 | YWHAH    |
| UBE2H    | 6.48E-18 | 0.57667208 | 0.408 | 0.227 | 8.86E-14 | NSC2 | UBE2H    |
| HES1     | 5.19E-18 | 0.6241432  | 0.232 | 0.105 | 7.10E-14 | NSC2 | HES1     |
| TUBB2B   | 3.36E-18 | 0.70403503 | 0.38  | 0.219 | 4.59E-14 | NSC2 | TUBB2B   |
| CNIH2    | 3.17E-18 | 0.41325504 | 0.152 | 0.052 | 4.34E-14 | NSC2 | CNIH2    |
| B4GAT1   | 3.11E-18 | 0.41938245 | 0.167 | 0.061 | 4.26E-14 | NSC2 | B4GAT1   |
| SRRM2    | 2.55E-18 | 0.60775411 | 0.364 | 0.195 | 3.49E-14 | NSC2 | SRRM2    |
| CNBP     | 1.87E-18 | 0.47087636 | 0.174 | 0.064 | 2.56E-14 | NSC2 | CNBP     |
| GNAS     | 1.53E-18 | 0.65890158 | 0.479 | 0.304 | 2.10E-14 | NSC2 | GNAS     |
| BNIP3    | 1.24E-18 | 0.49550253 | 0.2   | 0.08  | 1.70E-14 | NSC2 | BNIP3    |
| SLC38A2  | 1.13E-18 | 0.42459533 | 0.132 | 0.042 | 1.54E-14 | NSC2 | SLC38A2  |
| PTN1     | 9.27E-19 | 0.77829876 | 0.521 | 0.363 | 1.27E-14 | NSC2 | PTN      |
| STAG1    | 8.20E-19 | 0.55841158 | 0.542 | 0.36  | 1.12E-14 | NSC2 | STAG1    |
| FLNA     | 8.03E-19 | 0.36450934 | 0.108 | 0.03  | 1.10E-14 | NSC2 | FLNA     |
| CDON     | 6.32E-19 | 0.75780452 | 0.302 | 0.151 | 8.65E-15 | NSC2 | CDON     |
| SLC25A4  | 5.88E-19 | 0.47981364 | 0.163 | 0.058 | 8.04E-15 | NSC2 | SLC25A4  |
| SLC36A4  | 5.70E-19 | 0.52254024 | 0.239 | 0.103 | 7.80E-15 | NSC2 | SLC36A4  |
| CLIP2    | 3.12E-19 | 0.41746053 | 0.208 | 0.081 | 4.27E-15 | NSC2 | CLIP2    |
| FAM3C    | 3.04E-19 | 0.48173608 | 0.208 | 0.083 | 4.16E-15 | NSC2 | FAM3C    |
| RPS15    | 1.76E-19 | 0.53329041 | 0.184 | 0.068 | 2.41E-15 | NSC2 | RPS15    |
| SPARC    | 1.33E-19 | 0.57161923 | 0.388 | 0.21  | 1.82E-15 | NSC2 | SPARC    |
| PCSK1N   | 1.20E-19 | 0.55827303 | 0.256 | 0.113 | 1.64E-15 | NSC2 | PCSK1N   |
| NUDT4    | 8.06E-20 | 0.52927876 | 0.293 | 0.136 | 1.10E-15 | NSC2 | NUDT4    |
| KIF5C    | 7.88E-20 | 0.72363152 | 0.462 | 0.293 | 1.08E-15 | NSC2 | KIF5C    |
| ASXL3    | 6.06E-20 | 0.61474974 | 0.23  | 0.096 | 8.29E-16 | NSC2 | ASXL3    |
| SNTB1    | 3.30E-20 | 0.57036655 | 0.616 | 0.405 | 4.51E-16 | NSC2 | SNTB1    |
| CCK      | 2.33E-20 | 0.44912651 | 0.156 | 0.051 | 3.19E-16 | NSC2 | CCK      |
| MYL12A   | 5.40E-21 | 0.43049209 | 0.134 | 0.039 | 7.39E-17 | NSC2 | MYL12A   |
| TCF4     | 3.73E-21 | 0.45849599 | 0.926 | 0.924 | 5.10E-17 | NSC2 | TCF4     |
| BICD1    | 2.78E-21 | 0.58224619 | 0.785 | 0.66  | 3.80E-17 | NSC2 | BICD1    |
| CRYAB    | 2.18E-21 | 0.4430493  | 0.208 | 0.077 | 2.98E-17 | NSC2 | CRYAB    |
| MAP2K6   | 1.39E-21 | 0.69246488 | 0.297 | 0.14  | 1.90E-17 | NSC2 | MAP2K6   |
| CYP7B1   | 8.35E-22 | 0.80780237 | 0.336 | 0.165 | 1.14E-17 | NSC2 | CYP7B1   |
| ND5      | 5.85E-22 | 0.46747412 | 0.148 | 0.044 | 8.00E-18 | NSC2 | ND5      |
| LRRC58   | 4.25E-22 | 0.48180647 | 0.202 | 0.073 | 5.81E-18 | NSC2 | LRRC58   |
| RPS11    | 1.76E-22 | 0.36706725 | 0.111 | 0.027 | 2.40E-18 | NSC2 | RPS11    |
| ZIC2     | 1.44E-22 | 0.49123397 | 0.143 | 0.042 | 1.97E-18 | NSC2 | ZIC2     |

|           |          |            |       |       |          |      |           |
|-----------|----------|------------|-------|-------|----------|------|-----------|
| MOXD1     | 1.43E-22 | 0.79009177 | 0.499 | 0.305 | 1.96E-18 | NSC2 | MOXD1     |
| BZW1      | 1.42E-22 | 0.40868955 | 0.121 | 0.031 | 1.94E-18 | NSC2 | BZW1      |
| CD59      | 1.10E-22 | 0.61829091 | 0.23  | 0.09  | 1.50E-18 | NSC2 | CD59      |
| PNRC1     | 1.06E-22 | 0.54557361 | 0.189 | 0.066 | 1.45E-18 | NSC2 | PNRC1     |
| WSB1      | 7.12E-23 | 0.8024299  | 0.57  | 0.391 | 9.73E-19 | NSC2 | WSB1      |
| ITM2C     | 6.88E-23 | 0.71433096 | 0.393 | 0.208 | 9.41E-19 | NSC2 | ITM2C     |
| ZFPM2     | 4.79E-23 | 0.6307476  | 0.835 | 0.737 | 6.55E-19 | NSC2 | ZFPM2     |
| ARHGAP21  | 4.58E-23 | 0.54941119 | 0.584 | 0.34  | 6.27E-19 | NSC2 | ARHGAP21  |
| RBM26     | 3.05E-23 | 0.62602055 | 0.451 | 0.239 | 4.17E-19 | NSC2 | RBM26     |
| RPL10     | 2.27E-23 | 0.58535323 | 0.195 | 0.068 | 3.10E-19 | NSC2 | RPL10     |
| DOK6      | 2.25E-23 | 0.78538694 | 0.551 | 0.362 | 3.07E-19 | NSC2 | DOK6      |
| FREM1     | 1.80E-23 | 1.00610001 | 0.395 | 0.217 | 2.47E-19 | NSC2 | FREM1     |
| NOTCH2    | 9.14E-24 | 0.7304457  | 0.588 | 0.389 | 1.25E-19 | NSC2 | NOTCH2    |
| ASCL1     | 8.12E-24 | 0.38759994 | 0.091 | 0.018 | 1.11E-19 | NSC2 | ASCL1     |
| RPL4      | 1.82E-24 | 0.58244086 | 0.189 | 0.063 | 2.50E-20 | NSC2 | RPL4      |
| GLUL      | 1.39E-24 | 0.90015228 | 0.486 | 0.281 | 1.91E-20 | NSC2 | GLUL      |
| CALM3     | 7.05E-25 | 0.67513512 | 0.275 | 0.112 | 9.64E-21 | NSC2 | CALM3     |
| SLC35F1   | 6.49E-25 | 0.97866174 | 0.62  | 0.444 | 8.88E-21 | NSC2 | SLC35F1   |
| GABARAPL2 | 4.70E-25 | 0.52346981 | 0.18  | 0.057 | 6.43E-21 | NSC2 | GABARAPL2 |
| FTH1      | 4.16E-25 | 0.76636101 | 0.315 | 0.141 | 5.69E-21 | NSC2 | FTH1      |
| SPCS1     | 8.43E-26 | 0.46016435 | 0.15  | 0.04  | 1.15E-21 | NSC2 | SPCS1     |
| ARHGAP24  | 6.54E-26 | 1.01203184 | 0.336 | 0.157 | 8.94E-22 | NSC2 | ARHGAP24  |
| ATP6AP1   | 3.12E-26 | 0.52260548 | 0.174 | 0.051 | 4.27E-22 | NSC2 | ATP6AP1   |
| THY1      | 2.78E-26 | 0.63468348 | 0.241 | 0.087 | 3.80E-22 | NSC2 | THY1      |
| AP2M1     | 2.03E-26 | 0.47700214 | 0.143 | 0.037 | 2.77E-22 | NSC2 | AP2M1     |
| DBI       | 1.47E-26 | 0.5486427  | 0.178 | 0.053 | 2.01E-22 | NSC2 | DBI       |
| PGAM1     | 1.41E-26 | 0.59046362 | 0.202 | 0.066 | 1.93E-22 | NSC2 | PGAM1     |
| COX7B     | 1.09E-26 | 0.44431339 | 0.128 | 0.03  | 1.50E-22 | NSC2 | COX7B     |
| LTBP1     | 7.75E-27 | 0.90551677 | 0.581 | 0.379 | 1.06E-22 | NSC2 | LTBP1     |
| FXD6      | 5.15E-27 | 0.47917921 | 0.145 | 0.038 | 7.05E-23 | NSC2 | FXD6      |
| RAB14     | 2.58E-27 | 0.62063794 | 0.252 | 0.092 | 3.53E-23 | NSC2 | RAB14     |
| SERINC1   | 1.42E-27 | 0.77867116 | 0.354 | 0.162 | 1.94E-23 | NSC2 | SERINC1   |
| ND3       | 1.02E-27 | 0.59845443 | 0.206 | 0.066 | 1.39E-23 | NSC2 | ND3       |
| SHROOM3   | 5.78E-28 | 0.90691389 | 0.544 | 0.322 | 7.91E-24 | NSC2 | SHROOM3   |
| YWHAB     | 3.94E-28 | 0.83080961 | 0.334 | 0.147 | 5.39E-24 | NSC2 | YWHAB     |
| TUBB      | 3.21E-28 | 0.77155262 | 0.269 | 0.104 | 4.39E-24 | NSC2 | TUBB      |
| CAPN9     | 2.87E-28 | 0.62500396 | 0.161 | 0.043 | 3.92E-24 | NSC2 | CAPN9     |
| BTG1      | 9.76E-29 | 0.52618459 | 0.139 | 0.033 | 1.34E-24 | NSC2 | BTG1      |
| NNAT      | 2.12E-29 | 0.57953093 | 0.178 | 0.05  | 2.90E-25 | NSC2 | NNAT      |
| SETBP1    | 1.26E-29 | 0.81667602 | 0.445 | 0.219 | 1.72E-25 | NSC2 | SETBP1    |
| SYNM      | 1.69E-30 | 0.82309567 | 0.308 | 0.125 | 2.31E-26 | NSC2 | SYNM      |
| PROX1     | 5.58E-31 | 0.66799193 | 0.23  | 0.074 | 7.63E-27 | NSC2 | PROX1     |
| ND2       | 4.20E-31 | 0.79711433 | 0.321 | 0.129 | 5.75E-27 | NSC2 | ND2       |
| G3BP2     | 1.39E-31 | 0.52925273 | 0.184 | 0.05  | 1.90E-27 | NSC2 | G3BP2     |
| MAP2      | 9.36E-32 | 0.92496081 | 0.753 | 0.636 | 1.28E-27 | NSC2 | MAP2      |
| CALM2     | 6.00E-32 | 0.86591863 | 0.536 | 0.312 | 8.20E-28 | NSC2 | CALM2     |

|          |           |            |       |       |           |      |          |
|----------|-----------|------------|-------|-------|-----------|------|----------|
| PPIA     | 2.42E-32  | 0.80907231 | 0.308 | 0.12  | 3.31E-28  | NSC2 | PPIA     |
| ITM2B    | 2.93E-33  | 0.92467231 | 0.484 | 0.255 | 4.00E-29  | NSC2 | ITM2B    |
| NR2F1    | 1.18E-33  | 0.84332657 | 0.438 | 0.212 | 1.61E-29  | NSC2 | NR2F1    |
| GNB2     | 6.06E-34  | 0.68591149 | 0.239 | 0.075 | 8.29E-30  | NSC2 | GNB2     |
| SEMA6A   | 5.17E-34  | 0.84905982 | 0.341 | 0.135 | 7.07E-30  | NSC2 | SEMA6A   |
| CHL1     | 4.93E-34  | 0.72155565 | 0.837 | 0.697 | 6.75E-30  | NSC2 | CHL1     |
| CALM1    | 6.54E-35  | 0.93987939 | 0.597 | 0.362 | 8.94E-31  | NSC2 | CALM1    |
| DPYSL3   | 3.51E-35  | 0.77540319 | 0.262 | 0.085 | 4.80E-31  | NSC2 | DPYSL3   |
| PGRMC1   | 2.36E-35  | 0.64442508 | 0.184 | 0.047 | 3.23E-31  | NSC2 | PGRMC1   |
| HNRNPK   | 1.12E-36  | 0.71512915 | 0.302 | 0.106 | 1.53E-32  | NSC2 | HNRNPK   |
| LY6H     | 8.85E-37  | 0.7624163  | 0.282 | 0.094 | 1.21E-32  | NSC2 | LY6H     |
| APOE     | 4.27E-37  | 1.26089802 | 0.727 | 0.569 | 5.85E-33  | NSC2 | APOE     |
| ADAMTS18 | 2.78E-37  | 0.89816319 | 0.223 | 0.064 | 3.81E-33  | NSC2 | ADAMTS18 |
| UBB      | 1.95E-41  | 0.89616029 | 0.312 | 0.105 | 2.67E-37  | NSC2 | UBB      |
| HMGB1    | 1.61E-41  | 0.85831337 | 0.271 | 0.083 | 2.21E-37  | NSC2 | HMGB1    |
| ND1      | 6.52E-42  | 0.91747391 | 0.421 | 0.173 | 8.92E-38  | NSC2 | ND1      |
| COX2     | 5.66E-42  | 1.03162789 | 0.436 | 0.188 | 7.74E-38  | NSC2 | COX2     |
| ACTG1    | 1.44E-45  | 1.2516846  | 0.479 | 0.232 | 1.96E-41  | NSC2 | ACTG1    |
| PCSK6    | 4.04E-46  | 0.99228123 | 0.469 | 0.194 | 5.53E-42  | NSC2 | PCSK6    |
| PTPRZ1   | 2.46E-46  | 0.85500938 | 0.937 | 0.889 | 3.37E-42  | NSC2 | PTPRZ1   |
| STMN1    | 4.96E-49  | 0.94798236 | 0.302 | 0.089 | 6.79E-45  | NSC2 | STMN1    |
| SOX6     | 2.58E-49  | 1.03404376 | 0.748 | 0.5   | 3.53E-45  | NSC2 | SOX6     |
| CYTB     | 1.58E-51  | 1.04606922 | 0.425 | 0.156 | 2.16E-47  | NSC2 | CYTB     |
| RPL15    | 2.36E-53  | 0.92386968 | 0.315 | 0.09  | 3.22E-49  | NSC2 | RPL15    |
| UBC      | 1.82E-55  | 1.21094171 | 0.443 | 0.164 | 2.49E-51  | NSC2 | UBC      |
| FRAS1    | 1.55E-56  | 1.16096212 | 0.566 | 0.254 | 2.12E-52  | NSC2 | FRAS1    |
| KCNH7    | 1.89E-57  | 1.48309375 | 0.375 | 0.121 | 2.59E-53  | NSC2 | KCNH7    |
| GAPDH    | 8.68E-59  | 1.09339831 | 0.38  | 0.116 | 1.19E-54  | NSC2 | GAPDH    |
| TFAP2C   | 7.74E-59  | 0.75357197 | 0.193 | 0.033 | 1.06E-54  | NSC2 | TFAP2C   |
| COX3     | 6.89E-60  | 1.30843986 | 0.505 | 0.208 | 9.42E-56  | NSC2 | COX3     |
| ATP6     | 1.71E-60  | 0.86896908 | 0.289 | 0.068 | 2.34E-56  | NSC2 | ATP6     |
| ACTB     | 1.56E-62  | 1.07359884 | 0.412 | 0.131 | 2.13E-58  | NSC2 | ACTB     |
| FTL      | 6.69E-64  | 1.35493012 | 0.38  | 0.115 | 9.15E-60  | NSC2 | FTL      |
| VCAN     | 4.58E-65  | 1.28585682 | 0.644 | 0.31  | 6.26E-61  | NSC2 | VCAN     |
| B3GAT2   | 1.22E-68  | 0.90829988 | 0.193 | 0.028 | 1.67E-64  | NSC2 | B3GAT2   |
| PEA15    | 1.30E-75  | 1.04043983 | 0.289 | 0.058 | 1.78E-71  | NSC2 | PEA15    |
| NES      | 2.99E-78  | 0.4778346  | 0.111 | 0.006 | 4.09E-74  | NSC2 | NES      |
| PDE1C    | 3.63E-80  | 1.23444569 | 0.254 | 0.044 | 4.97E-76  | NSC2 | PDE1C    |
| FREM2    | 1.78E-87  | 0.84869041 | 0.165 | 0.015 | 2.44E-83  | NSC2 | FREM2    |
| VIM      | 8.98E-89  | 1.34499804 | 0.306 | 0.058 | 1.23E-84  | NSC2 | VIM      |
| ND4      | 8.71E-97  | 1.26986247 | 0.408 | 0.089 | 1.19E-92  | NSC2 | ND4      |
| TNC      | 1.68E-161 | 1.82109407 | 0.961 | 0.51  | 2.29E-157 | NSC2 | TNC      |
| NPSR1    | 7.12E-168 | 1.72386706 | 0.206 | 0.009 | 9.73E-164 | NSC2 | NPSR1    |
