# Supplementary material
Source: PubMed Central journal article supplement (PMC9343414)
Supplement: 41422_2022_678_MOESM19_ESM.pdf [file 41422_2022_678_MOESM19_ESM.pdf]

| <b>Supplementary information</b>                                                  |            |            |            |           |
|-----------------------------------------------------------------------------------|------------|------------|------------|-----------|
| <b>TableS5. differentially expressed genes between macaque NSC1 and mouse RGL</b> |            |            |            |           |
| gene                                                                              | monkey-RGL | mouse-RGL  | group      | specific  |
| A1BG                                                                              | 0.0023521  | 0          | conserved  | conserved |
| A1CF                                                                              | 0.00145098 | 0          | conserved  | conserved |
| A4GALT                                                                            | 0.00717387 | 0          | conserved  | conserved |
| AAAS                                                                              | 0.05867503 | 0.08200088 | conserved  | conserved |
| AACS                                                                              | 0.71223337 | 0.21482106 | conserved  | conserved |
| AADAC                                                                             | 0          | 0          | conserved  | conserved |
| AADA2L2                                                                           | 0.00237592 | 0          | conserved  | conserved |
| AADA2L3                                                                           | 0.00413201 | 0          | conserved  | conserved |
| AADAT                                                                             | 0.20668103 | 0.0121163  | conserved  | conserved |
| AAK1                                                                              | 2.9910779  | 0.42394477 | conserved  | conserved |
| AAMDC                                                                             | 0.59907212 | 1.43065703 | conserved  | conserved |
| AAMP                                                                              | 0.14776119 | 1.48655668 | mouse-RGL  | conserved |
| AANAT                                                                             | 0          | 0          | conserved  | conserved |
| AAR2                                                                              | 0.14276545 | 0.19863829 | conserved  | conserved |
| AARD                                                                              | 0          | 0.39601248 | conserved  | conserved |
| AARS2                                                                             | 0.21336212 | 0.06175026 | conserved  | conserved |
| AASDH                                                                             | 0.79961458 | 0.05145923 | conserved  | conserved |
| AASDHPPT                                                                          | 0.8331305  | 0.54234939 | conserved  | conserved |
| AASS                                                                              | 1.27488599 | 0.03832805 | monkey-NSC | conserved |
| AATF                                                                              | 0.53621196 | 0.19412424 | conserved  | conserved |
| ABAT                                                                              | 1.59402858 | 0.40329552 | monkey-NSC | conserved |
| ABCA1                                                                             | 2.89624213 | 1.15055388 | conserved  | conserved |
| ABCA12                                                                            | 0.04417001 | 0          | conserved  | conserved |
| ABCA13                                                                            | 0.04955569 | 0          | conserved  | conserved |
| ABCA3                                                                             | 0.9209778  | 0.22904455 | conserved  | conserved |
| ABCA4                                                                             | 0.00536793 | 0          | conserved  | conserved |
| ABCA5                                                                             | 0.31331686 | 0.1908314  | conserved  | conserved |
| ABCA6                                                                             | 0.05785886 | 0.15052633 | conserved  | conserved |
| ABCA7                                                                             | 0.07613118 | 0.00596726 | conserved  | conserved |
| ABCA9                                                                             | 0.0568135  | 0.01642595 | conserved  | conserved |
| ABCB11                                                                            | 0.03483886 | 0          | conserved  | conserved |
| ABCB5                                                                             | 0.01496058 | 0          | conserved  | conserved |
| ABCB7                                                                             | 0.47046852 | 0.07842646 | conserved  | conserved |
| ABCB8                                                                             | 0.12005251 | 0.287381   | conserved  | conserved |
| ABCB9                                                                             | 0.43176929 | 0.43037303 | conserved  | conserved |
| ABCC1                                                                             | 0.39762032 | 0.13106504 | conserved  | conserved |
| ABCC10                                                                            | 0.23803946 | 0.09055623 | conserved  | conserved |

|         |            |            |            |           |
|---------|------------|------------|------------|-----------|
| ABCC12  | 0          | 0.01103082 | conserved  | conserved |
| ABCC2   | 0.42498226 | 0          | conserved  | conserved |
| ABCC3   | 0.02649458 | 0.03027347 | conserved  | conserved |
| ABCC4   | 0.31316853 | 0.06941777 | conserved  | conserved |
| ABCC5   | 1.17211576 | 0.38329826 | conserved  | conserved |
| ABCC6   | 0.00425518 | 0          | conserved  | conserved |
| ABCC8   | 0.23459705 | 0.01041472 | conserved  | conserved |
| ABCC9   | 0.02098716 | 0          | conserved  | conserved |
| ABCD2   | 1.07808977 | 0.1665651  | conserved  | conserved |
| ABCD3   | 1.14989126 | 0.91193288 | conserved  | conserved |
| ABCD4   | 0.25810462 | 0.14722951 | conserved  | conserved |
| ABCE1   | 0.29660666 | 0.43117243 | conserved  | conserved |
| ABCF1   | 0.27847309 | 0.44006345 | conserved  | conserved |
| ABCF3   | 0.04469806 | 0.18576337 | conserved  | conserved |
| ABCG1   | 0.09478822 | 0.02758394 | conserved  | conserved |
| ABCG4   | 0.03405918 | 0.06950559 | conserved  | conserved |
| ABCG5   | 0.03572662 | 0.00393795 | conserved  | conserved |
| ABCG8   | 0.00960018 | 0          | conserved  | conserved |
| ABHD10  | 0.07967947 | 0.27148303 | conserved  | conserved |
| ABHD11  | 0.0357248  | 0.5574061  | conserved  | conserved |
| ABHD12  | 0.64238587 | 0.75123573 | conserved  | conserved |
| ABHD12B | 0.0371097  | 0          | conserved  | conserved |
| ABHD13  | 0.12596407 | 0.17387152 | conserved  | conserved |
| ABHD15  | 0.02830184 | 0.004023   | conserved  | conserved |
| ABHD16A | 0.36611597 | 0.44178512 | conserved  | conserved |
| ABHD17B | 0.34462293 | 1.19518186 | conserved  | conserved |
| ABHD18  | 1.11653929 | 0.17101218 | conserved  | conserved |
| ABHD2   | 1.95233034 | 0.48382193 | conserved  | conserved |
| ABHD3   | 1.11071027 | 0.09883173 | monkey-NSC | conserved |
| ABHD5   | 0.0924888  | 0.22513727 | conserved  | conserved |
| ABHD6   | 0.43858574 | 0.27387624 | conserved  | conserved |
| ABI1    | 2.58696028 | 0.60828087 | conserved  | conserved |
| ABI2    | 6.62486672 | 0.7446175  | monkey-NSC | conserved |
| ABI3BP  | 0.08162293 | 0          | conserved  | conserved |
| ABL1    | 1.85556263 | 0.25021814 | conserved  | conserved |
| ABL2    | 1.94494805 | 0.1752391  | conserved  | conserved |
| ABLIM1  | 12.2471571 | 0.07011554 | monkey-NSC | conserved |
| ABLIM2  | 0.36618777 | 0.10573248 | conserved  | conserved |
| ABR     | 3.21282953 | 0.16305358 | conserved  | conserved |
| ABRA    | 0.00219479 | 0          | conserved  | conserved |
| ABT1    | 0.01592365 | 0.19740925 | conserved  | conserved |

|        |            |            |            |           |
|--------|------------|------------|------------|-----------|
| ABTB1  | 0.07664853 | 0.19157071 | conserved  | conserved |
| ACAA2  | 0.10337473 | 0.68705804 | conserved  | conserved |
| ACACA  | 1.2645444  | 0.33819995 | monkey-NSC | conserved |
| ACAD8  | 0.06336573 | 0.23443909 | conserved  | conserved |
| ACAD9  | 0.1342618  | 0.13508011 | conserved  | conserved |
| ACADM  | 0.57708468 | 0.84612366 | conserved  | conserved |
| ACADS  | 0.13210112 | 0.42409922 | conserved  | conserved |
| ACADSB | 0.87088565 | 0.48448134 | conserved  | conserved |
| ACADVL | 0.2886582  | 0.51440583 | conserved  | conserved |
| ACAN   | 0.01397649 | 0          | conserved  | conserved |
| ACAP1  | 0.00941338 | 0.00909658 | conserved  | conserved |
| ACAP2  | 5.82211482 | 0.32597596 | monkey-NSC | conserved |
| ACBD3  | 0.51384567 | 0.18859038 | conserved  | conserved |
| ACBD4  | 0.15997104 | 0.26554914 | conserved  | conserved |
| ACBD5  | 0.39562072 | 0.53684283 | conserved  | conserved |
| ACBD6  | 1.9340892  | 0.86999661 | conserved  | conserved |
| ACCSL  | 0.00517793 | 0          | conserved  | conserved |
| ACD    | 0.01236758 | 0.42846551 | conserved  | conserved |
| ACE    | 0.04583287 | 0.01323827 | conserved  | conserved |
| ACE2   | 0.01225186 | 0          | conserved  | conserved |
| ACER1  | 0.06807671 | 0          | conserved  | conserved |
| ACER2  | 0.39363964 | 0.00410261 | conserved  | conserved |
| ACER3  | 0.9200284  | 0.07633597 | conserved  | conserved |
| ACHE   | 0.03658967 | 0.05684597 | conserved  | conserved |
| ACIN1  | 1.4699688  | 1.00593007 | conserved  | conserved |
| ACKR1  | 0.01022075 | 0.04924023 | conserved  | conserved |
| ACKR2  | 0.00750468 | 0          | conserved  | conserved |
| ACKR3  | 0.03015934 | 0.03872612 | conserved  | conserved |
| ACKR4  | 0.00819719 | 0          | conserved  | conserved |
| ACLY   | 0.43992882 | 0.65982548 | conserved  | conserved |
| ACMSD  | 0.01065126 | 0          | conserved  | conserved |
| ACO1   | 0.83886351 | 0.27318777 | conserved  | conserved |
| ACO2   | 2.11436075 | 0.91077665 | conserved  | conserved |
| ACOT12 | 0.02369616 | 0          | conserved  | conserved |
| ACOT7  | 0.37674541 | 0.29679092 | conserved  | conserved |
| ACOT8  | 0.16540352 | 0.15727875 | conserved  | conserved |
| ACOX2  | 0.43753879 | 0          | conserved  | conserved |
| ACOX3  | 0.16855446 | 0.1754637  | conserved  | conserved |
| ACP5   | 0.00125568 | 0.00295075 | conserved  | conserved |
| ACP6   | 0.19958424 | 0.26220266 | conserved  | conserved |
| ACR    | 0          | 0          | conserved  | conserved |

|        |            |            |            |           |
|--------|------------|------------|------------|-----------|
| ACRBP  | 0.0142812  | 0.13307679 | conserved  | conserved |
| ACRV1  | 0.00390595 | 0          | conserved  | conserved |
| ACSBG1 | 4.55761879 | 1.18038024 | monkey-NSC | conserved |
| ACSBG2 | 0.05561077 | 0          | conserved  | conserved |
| ACSF2  | 0.41706032 | 0.59227819 | conserved  | conserved |
| ACSF3  | 0.25029733 | 0.04804856 | conserved  | conserved |
| ACSL1  | 0.12198862 | 0.03138049 | conserved  | conserved |
| ACSL3  | 2.15699893 | 1.22893173 | monkey-NSC | conserved |
| ACSL4  | 0.63311649 | 0.07283685 | conserved  | conserved |
| ACSL5  | 0.02338018 | 0.03359295 | conserved  | conserved |
| ACSM1  | 0.00402558 | 0          | conserved  | conserved |
| ACSM3  | 0.02659608 | 0          | conserved  | conserved |
| ACSM4  | 0.07526205 | 0          | conserved  | conserved |
| ACSS1  | 2.42498818 | 0.45102916 | conserved  | conserved |
| ACSS2  | 0.35126075 | 0.17471708 | conserved  | conserved |
| ACSS3  | 0.56191726 | 0          | conserved  | conserved |
| ACTA1  | 0.00458587 | 0.01018144 | conserved  | conserved |
| ACTA2  | 0.00977779 | 0.04540718 | conserved  | conserved |
| ACTB   | 0.72335202 | 19.6995832 | mouse-RGL  | conserved |
| ACTC1  | 0.00595367 | 0          | conserved  | conserved |
| ACTG1  | 1.47695493 | 10.7778924 | mouse-RGL  | conserved |
| ACTG2  | 0.00706768 | 0          | conserved  | conserved |
| ACTL6A | 0.06171363 | 0.85924012 | mouse-RGL  | conserved |
| ACTL6B | 0.14253965 | 0.06779551 | conserved  | conserved |
| ACTL7A | 0          | 0          | conserved  | conserved |
| ACTL7B | 0.00492949 | 0.00776411 | conserved  | conserved |
| ACTN1  | 0.77400477 | 0.32180696 | conserved  | conserved |
| ACTN2  | 0.13063155 | 0.00941521 | conserved  | conserved |
| ACTN3  | 0.00585145 | 0          | conserved  | conserved |
| ACTN4  | 0.71703615 | 0.51446222 | conserved  | conserved |
| ACTR10 | 0.89654864 | 0.72274016 | conserved  | conserved |
| ACTR1A | 0.18199921 | 0.66620962 | conserved  | conserved |
| ACTR1B | 0.26950389 | 0.53147024 | conserved  | conserved |
| ACTR3  | 0.8680611  | 1.39346119 | conserved  | conserved |
| ACTR5  | 0.18924383 | 0.06109442 | conserved  | conserved |
| ACTRT1 | 0          | 0          | conserved  | conserved |
| ACTRT3 | 0.01932989 | 0          | conserved  | conserved |
| ACVR1  | 1.36916978 | 0.14634155 | conserved  | conserved |
| ACVR1B | 0.16927809 | 0.1167203  | conserved  | conserved |
| ACVR1C | 0.51305697 | 0          | conserved  | conserved |
| ACVR2A | 0.66688789 | 0.09031989 | conserved  | conserved |

|          |            |            |           |           |
|----------|------------|------------|-----------|-----------|
| ACVR2B   | 0.08501265 | 0.13311943 | conserved | conserved |
| ACVRL1   | 0.00197541 | 0          | conserved | conserved |
| ACY3     | 0          | 0.01630508 | conserved | conserved |
| ADAD1    | 0.01156655 | 0          | conserved | conserved |
| ADAD2    | 0          | 0          | conserved | conserved |
| ADAL     | 0.36674396 | 0.17247063 | conserved | conserved |
| ADAM10   | 1.59704968 | 0.5255311  | conserved | conserved |
| ADAM11   | 0.26906087 | 0.07760357 | conserved | conserved |
| ADAM12   | 0.10051567 | 0.02620032 | conserved | conserved |
| ADAM15   | 0.27934619 | 0.19760709 | conserved | conserved |
| ADAM17   | 0.69315576 | 0.24865613 | conserved | conserved |
| ADAM2    | 0.00798222 | 0          | conserved | conserved |
| ADAM22   | 1.10036915 | 0.15411451 | conserved | conserved |
| ADAM23   | 1.144225   | 0.28333685 | conserved | conserved |
| ADAM28   | 0.08728914 | 0.01560838 | conserved | conserved |
| ADAM33   | 0.10779023 | 0.00393916 | conserved | conserved |
| ADAM7    | 0.01348958 | 0          | conserved | conserved |
| ADAM8    | 0.07278083 | 0.00641621 | conserved | conserved |
| ADAMDEC1 | 0          | 0          | conserved | conserved |
| ADAMTS1  | 0.03110354 | 0.46071668 | conserved | conserved |
| ADAMTS12 | 0.06475997 | 0          | conserved | conserved |
| ADAMTS13 | 0.25540662 | 0          | conserved | conserved |
| ADAMTS14 | 0.00417075 | 0          | conserved | conserved |
| ADAMTS15 | 0.00973162 | 0.00466381 | conserved | conserved |
| ADAMTS16 | 0.06386264 | 0.01396925 | conserved | conserved |
| ADAMTS17 | 0.11064526 | 0.01513954 | conserved | conserved |
| ADAMTS18 | 0.38188619 | 0.10860236 | conserved | conserved |
| ADAMTS2  | 0.22730534 | 0.01800994 | conserved | conserved |
| ADAMTS20 | 0.00705326 | 0.01405657 | conserved | conserved |
| ADAMTS3  | 1.06876123 | 0.00555424 | conserved | conserved |
| ADAMTS4  | 0.0233946  | 0.04186158 | conserved | conserved |
| ADAMTS5  | 0.03392078 | 0.0183239  | conserved | conserved |
| ADAMTS6  | 0.17658736 | 0.03263887 | conserved | conserved |
| ADAMTS7  | 0.18275601 | 0.02228817 | conserved | conserved |
| ADAMTS8  | 0.07771531 | 0.02569243 | conserved | conserved |
| ADAMTS9  | 0.45892346 | 0.15999543 | conserved | conserved |
| ADAMTSL1 | 0.10760229 | 0.01477157 | conserved | conserved |
| ADAMTSL2 | 0.00902151 | 0.00575761 | conserved | conserved |
| ADAMTSL3 | 0.69573023 | 0.00616726 | conserved | conserved |
| ADAMTSL4 | 0.0381645  | 0.01467944 | conserved | conserved |
| ADAP1    | 0.14904667 | 0.02185884 | conserved | conserved |

|           |            |            |            |           |
|-----------|------------|------------|------------|-----------|
| ADAR      | 0.51987188 | 0.19978877 | conserved  | conserved |
| ADARB1    | 0.59748717 | 0.11210465 | conserved  | conserved |
| ADAT1     | 0.08934504 | 0.12367986 | conserved  | conserved |
| ADAT2     | 0.05944672 | 0.09470649 | conserved  | conserved |
| ADCK1     | 0.24884659 | 0.08901939 | conserved  | conserved |
| ADCY10    | 0.29033103 | 0.0356816  | conserved  | conserved |
| ADCY2     | 4.79522076 | 0.28481918 | monkey-NSC | conserved |
| ADCY3     | 0.41389588 | 0.21960414 | conserved  | conserved |
| ADCY4     | 0.00688695 | 0          | conserved  | conserved |
| ADCY5     | 0.43248523 | 0.04048363 | conserved  | conserved |
| ADCY6     | 0.37980163 | 0.06318378 | conserved  | conserved |
| ADCY7     | 0.0208953  | 0.0031327  | conserved  | conserved |
| ADCY8     | 1.82499058 | 0.03223148 | monkey-NSC | conserved |
| ADCYAP1R1 | 1.66389531 | 1.52352875 | monkey-NSC | conserved |
| ADD1      | 2.66422355 | 1.11330304 | conserved  | conserved |
| ADD2      | 0.36678488 | 0.09682104 | conserved  | conserved |
| ADD3      | 7.84539473 | 0.53755341 | conserved  | conserved |
| ADGB      | 0.02576127 | 0.00762365 | conserved  | conserved |
| ADGRA1    | 0.17689649 | 0.11969486 | conserved  | conserved |
| ADGRA2    | 0.04590779 | 0.01209267 | conserved  | conserved |
| ADGRB1    | 0.67643062 | 1.19647705 | conserved  | conserved |
| ADGRB2    | 0.61630424 | 0.5835063  | conserved  | conserved |
| ADGRB3    | 41.6593037 | 0.56406721 | conserved  | conserved |
| ADGRD1    | 0.0155202  | 0.00171907 | conserved  | conserved |
| ADGRE1    | 0.00381811 | 0          | conserved  | conserved |
| ADGRE5    | 0.0182059  | 0.01709501 | conserved  | conserved |
| ADGRF1    | 0          | 0          | conserved  | conserved |
| ADGRF3    | 1.37082231 | 0          | monkey-NSC | conserved |
| ADGRF4    | 0.00212252 | 0          | conserved  | conserved |
| ADGRF5    | 0.01657134 | 0          | conserved  | conserved |
| ADGRG1    | 1.87343585 | 1.33854666 | conserved  | conserved |
| ADGRG2    | 0.28049482 | 0.00322465 | conserved  | conserved |
| ADGRG3    | 0.03320686 | 0          | conserved  | conserved |
| ADGRG4    | 0.00453243 | 0.00413694 | conserved  | conserved |
| ADGRG5    | 0.01303021 | 0          | conserved  | conserved |
| ADGRG6    | 0.03969954 | 0.02162032 | conserved  | conserved |
| ADGRG7    | 0.00981019 | 0          | conserved  | conserved |
| ADGRL2    | 0.38764492 | 0.18933751 | conserved  | conserved |
| ADGRL3    | 7.05743444 | 0.42269952 | monkey-NSC | conserved |
| ADGRL4    | 0.03691912 | 0.00233402 | conserved  | conserved |
| ADGRV1    | 81.5478438 | 0.52387397 | conserved  | conserved |

|         |            |            |            |           |
|---------|------------|------------|------------|-----------|
| ADH4    | 0.00078847 | 0          | conserved  | conserved |
| ADI1    | 0.22712951 | 0.27097975 | conserved  | conserved |
| ADIPOQ  | 0.0008828  | 0          | conserved  | conserved |
| ADIPOR1 | 0.20839276 | 0.85446658 | conserved  | conserved |
| ADIPOR2 | 0.50483959 | 0.36620518 | conserved  | conserved |
| ADK     | 5.05099295 | 0.85651818 | monkey-NSC | conserved |
| ADM     | 0.00151097 | 0.00629865 | conserved  | conserved |
| ADNP    | 2.48625071 | 0          | conserved  | conserved |
| ADO     | 0.00154401 | 0.45059434 | conserved  | conserved |
| ADORA1  | 0.79526656 | 0.40593265 | conserved  | conserved |
| ADRA1A  | 1.54873103 | 0.0167323  | monkey-NSC | conserved |
| ADRB2   | 0.00268168 | 0.00394037 | conserved  | conserved |
| ADRB3   | 0          | 0          | conserved  | conserved |
| ADSL    | 0.0905262  | 0.25318772 | conserved  | conserved |
| ADTRP   | 0.07941055 | 0          | conserved  | conserved |
| AEBP2   | 1.4236194  | 0.25208281 | conserved  | conserved |
| AEN     | 0.01140699 | 0.37716078 | conserved  | conserved |
| AFAP1   | 0.17802807 | 0.37470151 | conserved  | conserved |
| AFAP1L1 | 0.10763695 | 0.04501905 | conserved  | conserved |
| AFF1    | 2.26958006 | 0.03563324 | monkey-NSC | conserved |
| AFF2    | 1.12898416 | 0.00804403 | conserved  | conserved |
| AFMID   | 0.07112461 | 0          | conserved  | conserved |
| AFP     | 0          | 0          | conserved  | conserved |
| AFTPH   | 0.67898664 | 0.24620742 | conserved  | conserved |
| AGA     | 0.10832926 | 0.08714034 | conserved  | conserved |
| AGAP2   | 0.0249019  | 0.04402406 | conserved  | conserved |
| AGAP3   | 0.36563031 | 0.20746552 | conserved  | conserved |
| AGBL1   | 0.58711763 | 0.00746845 | conserved  | conserved |
| AGBL2   | 0.16479923 | 0          | conserved  | conserved |
| AGBL3   | 0.19012839 | 0.26861365 | conserved  | conserved |
| AGER    | 0.06793292 | 0          | conserved  | conserved |
| AGFG1   | 0.94996207 | 0.29433834 | conserved  | conserved |
| AGFG2   | 0.33915901 | 0.26198221 | conserved  | conserved |
| AGK     | 1.04022418 | 0.22692843 | conserved  | conserved |
| AGL     | 1.16922848 | 1.9204031  | conserved  | conserved |
| AGMAT   | 0.05387885 | 0.00345616 | conserved  | conserved |
| AGMO    | 0.02718022 | 0.01111739 | conserved  | conserved |
| AGO1    | 0.53281373 | 0.46220892 | conserved  | conserved |
| AGO2    | 1.03214505 | 0.41998765 | conserved  | conserved |
| AGPAT1  | 0.14759296 | 0.32265844 | conserved  | conserved |
| AGPAT2  | 0.01465139 | 0.1110449  | conserved  | conserved |

|         |            |            |            |           |
|---------|------------|------------|------------|-----------|
| AGPAT4  | 0.57150591 | 0.36632102 | conserved  | conserved |
| AGPAT5  | 1.66539117 | 0.54861764 | conserved  | conserved |
| AGPS    | 0.91451281 | 0.15382581 | conserved  | conserved |
| AGR2    | 0.00333144 | 0          | conserved  | conserved |
| AGR3    | 0.12122099 | 0.00682812 | conserved  | conserved |
| AGT     | 1.62910229 | 0.22818711 | monkey-NSC | conserved |
| AGTPBP1 | 1.1082179  | 0.19176318 | conserved  | conserved |
| AGXT    | 0          | 0          | conserved  | conserved |
| AGXT2   | 0.00586023 | 0          | conserved  | conserved |
| AHCTF1  | 3.4835571  | 0.31385104 | conserved  | conserved |
| AHCYL1  | 3.87830297 | 1.39473074 | conserved  | conserved |
| AHCYL2  | 10.087223  | 0.24726981 | conserved  | conserved |
| AHDC1   | 0.49736901 | 0.29486609 | conserved  | conserved |
| AHNAK   | 0.58089894 | 0.08895824 | conserved  | conserved |
| AHSA1   | 0.17668379 | 0.97812045 | conserved  | conserved |
| AHSG    | 0          | 0          | conserved  | conserved |
| AICDA   | 0          | 0          | conserved  | conserved |
| AIF1    | 0.00212995 | 0.02841217 | conserved  | conserved |
| AIF1L   | 0.10437985 | 0.64387073 | conserved  | conserved |
| AIFM1   | 0.27354807 | 0.22708683 | conserved  | conserved |
| AIFM2   | 0.12124318 | 0.04436808 | conserved  | conserved |
| AIFM3   | 1.76142854 | 0.09298023 | monkey-NSC | conserved |
| AIG1    | 3.30066434 | 0.33250536 | conserved  | conserved |
| AIM2    | 0.03304055 | 0.00816121 | conserved  | conserved |
| AIMP1   | 0.12053396 | 0.83140925 | conserved  | conserved |
| AIMP2   | 0.15651474 | 0.26337947 | conserved  | conserved |
| AIP     | 0.13422441 | 0.34843924 | conserved  | conserved |
| AIPL1   | 0.00747401 | 0          | conserved  | conserved |
| AIRE    | 0.14233491 | 0.00265787 | conserved  | conserved |
| AJUBA   | 0.0149012  | 0.13402596 | conserved  | conserved |
| AK1     | 0.13888247 | 0.60912666 | conserved  | conserved |
| AK3     | 0.40288708 | 0.77260775 | conserved  | conserved |
| AK5     | 1.92964248 | 0.03295433 | monkey-NSC | conserved |
| AK7     | 0.04334184 | 0          | conserved  | conserved |
| AK8     | 0.76314876 | 0          | conserved  | conserved |
| AK9     | 0.08770528 | 0.00203474 | conserved  | conserved |
| AKAP1   | 1.06239116 | 0.09274818 | monkey-NSC | conserved |
| AKAP10  | 1.26372618 | 0.0468959  | monkey-NSC | conserved |
| AKAP11  | 1.0070401  | 0.48766598 | conserved  | conserved |
| AKAP12  | 1.16233785 | 0.04373466 | conserved  | conserved |
| AKAP13  | 1.94402632 | 0.24768863 | conserved  | conserved |



|          |            |            |            |           |
|----------|------------|------------|------------|-----------|
| AKAP14   | 0.0294625  | 0          | conserved  | conserved |
| AKAP3    | 0.0588966  | 0          | conserved  | conserved |
| AKAP4    | 0          | 0          | conserved  | conserved |
| AKAP6    | 3.16923805 | 0.0878569  | conserved  | conserved |
| AKAP7    | 1.47211229 | 0.4235583  | conserved  | conserved |
| AKAP8L   | 2.96812219 | 0.50170266 | conserved  | conserved |
| AKAP9    | 3.2685496  | 1.0822693  | conserved  | conserved |
| AKIP1    | 0.189033   | 0.16196778 | conserved  | conserved |
| AKIRIN1  | 0.33892701 | 0.85670687 | conserved  | conserved |
| AKIRIN2  | 0.23206156 | 0.67498337 | conserved  | conserved |
| AKNA     | 0.14712344 | 0.01529163 | conserved  | conserved |
| AKR1A1   | 0.70717892 | 3.21965698 | conserved  | conserved |
| AKR1D1   | 0.00659162 | 0          | conserved  | conserved |
| AKT1     | 0.15778002 | 0.57229828 | conserved  | conserved |
| AKT2     | 0.5384579  | 0.74571781 | conserved  | conserved |
| AKT3     | 6.65026431 | 0.15436231 | conserved  | conserved |
| AKTIP    | 0.21051026 | 0.96860765 | conserved  | conserved |
| ALAD     | 0.08626262 | 0.3527653  | conserved  | conserved |
| ALAS1    | 0.05687307 | 0.23517371 | conserved  | conserved |
| ALAS2    | 0.01027775 | 0          | conserved  | conserved |
| ALB      | 0.00120269 | 0          | conserved  | conserved |
| ALCAM    | 2.30406414 | 1.34951589 | monkey-NSC | conserved |
| ALDH18A1 | 0.43131058 | 0.22066935 | conserved  | conserved |
| ALDH1A1  | 8.65429433 | 0.03908737 | monkey-NSC | conserved |
| ALDH1A2  | 0.09239431 | 0          | conserved  | conserved |
| ALDH1A3  | 0.00103139 | 0          | conserved  | conserved |
| ALDH1B1  | 0.00184147 | 0.00845086 | conserved  | conserved |
| ALDH1L1  | 1.86513067 | 0.32984974 | monkey-NSC | conserved |
| ALDH1L2  | 0.16015321 | 0.02006077 | conserved  | conserved |
| ALDH3A1  | 0.01802457 | 0          | conserved  | conserved |
| ALDH3A2  | 0.46269046 | 0.170698   | conserved  | conserved |
| ALDH4A1  | 0.52580683 | 0.18788685 | conserved  | conserved |
| ALDH5A1  | 0.31510462 | 0.38470087 | conserved  | conserved |
| ALDH6A1  | 0.70142485 | 0.81851235 | conserved  | conserved |
| ALDOB    | 0          | 0          | conserved  | conserved |
| ALDOC    | 1.78612724 | 14.576824  | conserved  | conserved |
| ALG11    | 0.30673758 | 0.21108543 | conserved  | conserved |
| ALG12    | 0.48527145 | 0.06911869 | conserved  | conserved |
| ALG13    | 0.40199773 | 0.09602667 | conserved  | conserved |
| ALG2     | 0.15082762 | 0.3774251  | conserved  | conserved |
| ALG3     | 0.02516076 | 0.1104021  | conserved  | conserved |

|          |            |            |            |           |
|----------|------------|------------|------------|-----------|
| ALG5     | 0.30749658 | 0.51119941 | conserved  | conserved |
| ALG6     | 0.64138118 | 0.11488757 | conserved  | conserved |
| ALG8     | 0.8863762  | 0.07710328 | conserved  | conserved |
| ALK      | 2.53704903 | 0          | monkey-NSC | conserved |
| ALKBH1   | 0.36225382 | 0.44137067 | conserved  | conserved |
| ALKBH2   | 0.14611383 | 0.1769754  | conserved  | conserved |
| ALKBH3   | 0.29886691 | 0.30449101 | conserved  | conserved |
| ALKBH4   | 0.20930683 | 0.07847429 | conserved  | conserved |
| ALKBH5   | 0.55682862 | 0.58644452 | conserved  | conserved |
| ALKBH6   | 0.05229541 | 0.43086916 | conserved  | conserved |
| ALKBH7   | 0.05373418 | 0.40033348 | conserved  | conserved |
| ALKBH8   | 0.23464899 | 0.20911252 | conserved  | conserved |
| ALLC     | 0.00582054 | 0          | conserved  | conserved |
| ALOX12   | 0.24776128 | 0          | conserved  | conserved |
| ALOX15   | 0.04902687 | 0          | conserved  | conserved |
| ALOX5    | 0.00628095 | 0          | conserved  | conserved |
| ALOX5AP  | 0.008387   | 0.00898504 | conserved  | conserved |
| ALOXE3   | 0.01580848 | 0.00924412 | conserved  | conserved |
| ALPK1    | 0.32385888 | 0.02715841 | conserved  | conserved |
| ALPK2    | 0.01811964 | 0.00334117 | conserved  | conserved |
| ALPL     | 0.14745892 | 0          | conserved  | conserved |
| ALS2     | 0.81622706 | 0.05357609 | conserved  | conserved |
| ALS2CL   | 0.00180016 | 0.01401577 | conserved  | conserved |
| AMACR    | 0.05031057 | 0.06085522 | conserved  | conserved |
| AMBN     | 0          | 0          | conserved  | conserved |
| AMBP     | 0          | 0          | conserved  | conserved |
| AMDHD1   | 0.00817023 | 0.00235282 | conserved  | conserved |
| AMER1    | 0.00939052 | 0.21151335 | conserved  | conserved |
| AMFR     | 0.60080387 | 1.08210058 | conserved  | conserved |
| AMIGO1   | 0.02445302 | 0.21654123 | conserved  | conserved |
| AMIGO2   | 0.00153866 | 0.01240552 | conserved  | conserved |
| AMIGO3   | 0.00056782 | 0.0074773  | conserved  | conserved |
| AMMECR1  | 0.76906145 | 0.0682892  | conserved  | conserved |
| AMMECR1L | 0.2514778  | 0.74308023 | conserved  | conserved |
| AMN1     | 0.64477974 | 0.67857648 | conserved  | conserved |
| AMOT     | 0.78537135 | 0.42464664 | conserved  | conserved |
| AMOTL1   | 0.20189336 | 0.48083106 | conserved  | conserved |
| AMOTL2   | 0.04796989 | 0.2137234  | conserved  | conserved |
| AMPD1    | 0          | 0          | conserved  | conserved |
| AMPD2    | 0.21903141 | 0.13997739 | conserved  | conserved |
| AMPD3    | 0.13880129 | 0.33095656 | conserved  | conserved |

|          |            |            |           |           |
|----------|------------|------------|-----------|-----------|
| AMPH     | 0.91485954 | 0.23119831 | conserved | conserved |
| AMT      | 0.48530929 | 0.45947909 | conserved | conserved |
| AMTN     | 0          | 0          | conserved | conserved |
| ANAPC1   | 0.45898769 | 0.47162437 | conserved | conserved |
| ANAPC10  | 0.84311602 | 0.64557768 | conserved | conserved |
| ANAPC13  | 0.06654857 | 2.83753087 | mouse-RGL | conserved |
| ANAPC16  | 0.58290812 | 1.37996868 | conserved | conserved |
| ANAPC2   | 0.18247547 | 0.26254717 | conserved | conserved |
| ANAPC4   | 0.53365154 | 0.28107739 | conserved | conserved |
| ANAPC5   | 1.00859799 | 1.76701417 | conserved | conserved |
| ANGEL1   | 0.43632392 | 0.00805371 | conserved | conserved |
| ANGEL2   | 0.70730172 | 0.69767725 | conserved | conserved |
| ANGPT1   | 4.68809979 | 0.12740039 | conserved | conserved |
| ANGPT2   | 0.54320267 | 0.02758832 | conserved | conserved |
| ANGPT4   | 0.03280138 | 0          | conserved | conserved |
| ANGPTL1  | 0.03337586 | 0.02028129 | conserved | conserved |
| ANGPTL2  | 0.15083714 | 0.0392753  | conserved | conserved |
| ANGPTL3  | 0.00249438 | 0          | conserved | conserved |
| ANGPTL4  | 0.20635634 | 0.36730752 | conserved | conserved |
| ANGPTL6  | 0.01092449 | 0.31086374 | conserved | conserved |
| ANGPTL7  | 0.01017012 | 0          | conserved | conserved |
| ANK1     | 0.08406107 | 0.01113932 | conserved | conserved |
| ANK2     | 14.4558862 | 2.34579582 | conserved | conserved |
| ANKAR    | 0.83699811 | 0          | conserved | conserved |
| ANKEF1   | 0          | 0.03065328 | conserved | conserved |
| ANKFN1   | 1.13071833 | 0          | conserved | conserved |
| ANKFY1   | 0.87366932 | 0.325724   | conserved | conserved |
| ANKIB1   | 1.35187809 | 0.42677855 | conserved | conserved |
| ANKLE1   | 0.00303354 | 0.00392353 | conserved | conserved |
| ANKMY1   | 0.30832229 | 0          | conserved | conserved |
| ANKMY2   | 0.43437332 | 0.30951604 | conserved | conserved |
| ANKRA2   | 0.14169462 | 1.09652715 | conserved | conserved |
| ANKRD1   | 0.00935809 | 0          | conserved | conserved |
| ANKRD10  | 1.68290495 | 0.8946379  | conserved | conserved |
| ANKRD11  | 2.70284864 | 0.83848843 | conserved | conserved |
| ANKRD13A | 0.30756971 | 0.20201075 | conserved | conserved |
| ANKRD13B | 0.24277754 | 0.13937606 | conserved | conserved |
| ANKRD13C | 1.42258125 | 0.34427009 | conserved | conserved |
| ANKRD16  | 0.3809496  | 0.18115374 | conserved | conserved |
| ANKRD2   | 0.09299235 | 0          | conserved | conserved |
| ANKRD22  | 0          | 0          | conserved | conserved |

|          |            |            |            |           |
|----------|------------|------------|------------|-----------|
| ANKRD24  | 0.50341894 | 0.31409428 | conserved  | conserved |
| ANKRD27  | 0.95876506 | 0.10750183 | conserved  | conserved |
| ANKRD28  | 1.49271829 | 0.14845906 | conserved  | conserved |
| ANKRD29  | 0.358337   | 0.11663881 | conserved  | conserved |
| ANKRD31  | 0.25170445 | 0          | conserved  | conserved |
| ANKRD33  | 0          | 0          | conserved  | conserved |
| ANKRD34B | 0.01114541 | 0.00805242 | conserved  | conserved |
| ANKRD34C | 0.0023758  | 0          | conserved  | conserved |
| ANKRD37  | 0.01439884 | 0.05065906 | conserved  | conserved |
| ANKRD40  | 0.19469477 | 0.42559878 | conserved  | conserved |
| ANKRD42  | 0.59255595 | 0.09473424 | conserved  | conserved |
| ANKRD44  | 1.68268685 | 0.06943687 | conserved  | conserved |
| ANKRD46  | 0.54669394 | 0.56626589 | conserved  | conserved |
| ANKRD49  | 0.08682158 | 0.21192388 | conserved  | conserved |
| ANKRD50  | 0.05377108 | 0.07893998 | conserved  | conserved |
| ANKRD54  | 0.10662599 | 0.37121933 | conserved  | conserved |
| ANKRD55  | 0.06437665 | 0.0117668  | conserved  | conserved |
| ANKRD6   | 0.47044152 | 0.28800148 | conserved  | conserved |
| ANKRD60  | 0          | 0          | conserved  | conserved |
| ANKRD61  | 0.00738971 | 0.18213395 | conserved  | conserved |
| ANKRD66  | 0          | 0.02355474 | conserved  | conserved |
| ANKS3    | 0.7874955  | 0.22321732 | conserved  | conserved |
| ANKS4B   | 0.00102594 | 0          | conserved  | conserved |
| ANKS6    | 0.2129896  | 0.0171791  | conserved  | conserved |
| ANKUB1   | 0.06120476 | 0.01040609 | conserved  | conserved |
| ANKZF1   | 0.40785619 | 0.13624341 | conserved  | conserved |
| ANLN     | 0.15655901 | 0.03650058 | conserved  | conserved |
| ANO1     | 0.02343906 | 0.03660071 | conserved  | conserved |
| ANO10    | 0.5467432  | 0.11018121 | conserved  | conserved |
| ANO3     | 0.66524403 | 0.01362449 | conserved  | conserved |
| ANO4     | 0.44019753 | 0.00645903 | conserved  | conserved |
| ANO5     | 0.8661887  | 0          | conserved  | conserved |
| ANO6     | 1.50594161 | 0.19533965 | monkey-NSC | conserved |
| ANO7     | 0.08975685 | 0          | conserved  | conserved |
| ANP32B   | 0.45095819 | 1.70102153 | conserved  | conserved |
| ANP32E   | 0.12418662 | 1.66788112 | mouse-RGL  | conserved |
| ANPEP    | 0.00340239 | 0          | conserved  | conserved |
| ANTXR1   | 6.24741925 | 0.22794018 | conserved  | conserved |
| ANTXR2   | 0.64163986 | 0.02222502 | conserved  | conserved |
| ANXA1    | 0.19520819 | 0.07534226 | conserved  | conserved |
| ANXA10   | 0.00807173 | 0          | conserved  | conserved |

|         |            |            |            |           |
|---------|------------|------------|------------|-----------|
| ANXA11  | 0.3711035  | 0.03585365 | conserved  | conserved |
| ANXA2   | 0.03606194 | 0.28947163 | conserved  | conserved |
| ANXA3   | 0.04083917 | 0.02881406 | conserved  | conserved |
| ANXA4   | 0.44116052 | 0.18833945 | conserved  | conserved |
| ANXA5   | 0.24952742 | 0.28195672 | conserved  | conserved |
| ANXA6   | 0.47207566 | 0.491726   | conserved  | conserved |
| ANXA7   | 0.72415842 | 0.16647858 | conserved  | conserved |
| AOAH    | 0.0348444  | 0          | conserved  | conserved |
| AOC2    | 0.02532903 | 0.02774077 | conserved  | conserved |
| AOX1    | 0.01448138 | 0.06963371 | conserved  | conserved |
| AP1B1   | 0.72092923 | 0.2502717  | conserved  | conserved |
| AP1G1   | 0.77036233 | 0.28773722 | conserved  | conserved |
| AP1M1   | 0.3757774  | 0.52711439 | conserved  | conserved |
| AP1S1   | 0.09852834 | 0.95016248 | mouse-RGL  | conserved |
| AP1S2   | 0.25114146 | 1.27029765 | mouse-RGL  | conserved |
| AP1S3   | 0.00719873 | 0.00865355 | conserved  | conserved |
| AP2A1   | 0.58725789 | 0.39526852 | conserved  | conserved |
| AP2A2   | 0.83675141 | 0.69353736 | conserved  | conserved |
| AP2B1   | 1.25386089 | 0.71874547 | conserved  | conserved |
| AP2M1   | 0.17004015 | 2.83188738 | mouse-RGL  | conserved |
| AP2S1   | 0.1971781  | 2.03125543 | conserved  | conserved |
| AP3B1   | 1.65937542 | 0.23953716 | conserved  | conserved |
| AP3B2   | 0.64408971 | 0.10223595 | conserved  | conserved |
| AP3D1   | 1.44200938 | 0.25890914 | monkey-NSC | conserved |
| AP3M1   | 0.32276793 | 0.5186274  | conserved  | conserved |
| AP3M2   | 0.2102585  | 0.16159613 | conserved  | conserved |
| AP3S1   | 0.54337141 | 3.47603659 | mouse-RGL  | conserved |
| AP4E1   | 0.56120047 | 0.08164356 | conserved  | conserved |
| AP4M1   | 0.23272425 | 0.32322377 | conserved  | conserved |
| AP5B1   | 0.01734081 | 0          | conserved  | conserved |
| AP5M1   | 0.35988692 | 0.0676638  | conserved  | conserved |
| AP5S1   | 0.07646357 | 0.29156309 | conserved  | conserved |
| AP5Z1   | 0.21016334 | 0.08371112 | conserved  | conserved |
| APBA2   | 2.61090186 | 0.83404226 | conserved  | conserved |
| APBA3   | 0.10217387 | 0.1743423  | conserved  | conserved |
| APBB1IP | 0.11877831 | 0          | conserved  | conserved |
| APC     | 7.17708193 | 0.97849286 | monkey-NSC | conserved |
| APEH    | 0.11079533 | 0.10962136 | conserved  | conserved |
| APEX1   | 0.1203246  | 1.27914063 | mouse-RGL  | conserved |
| APEX2   | 0.00995359 | 0.04443217 | conserved  | conserved |
| APH1A   | 0.10164684 | 0.53953095 | conserved  | conserved |

|         |            |            |            |           |
|---------|------------|------------|------------|-----------|
| API5    | 0.4431751  | 0.57105997 | conserved  | conserved |
| APIP    | 0.3598886  | 0.27302933 | conserved  | conserved |
| APLF    | 0.24135749 | 0.07580839 | conserved  | conserved |
| APLNR   | 0          | 0.00415979 | conserved  | conserved |
| APLP1   | 0.34878079 | 0.4124144  | conserved  | conserved |
| APLP2   | 0.85240463 | 1.73553023 | conserved  | conserved |
| APOA2   | 0.00114675 | 0          | conserved  | conserved |
| APOB    | 0          | 0          | conserved  | conserved |
| APOBEC2 | 0.00647585 | 0          | conserved  | conserved |
| APOD    | 0.07627031 | 0.02669077 | conserved  | conserved |
| APOE    | 8.67226642 | 32.2312245 | monkey-NSC | conserved |
| APOL6   | 0.00891955 | 0.00290408 | conserved  | conserved |
| APOLD1  | 0.16062618 | 0.00647758 | conserved  | conserved |
| APOM    | 0.01828473 | 0          | conserved  | conserved |
| APOO    | 0.78444993 | 0.32067578 | conserved  | conserved |
| APOOL   | 0.58710312 | 0.24649184 | conserved  | conserved |
| APP     | 5.32436644 | 1.2267985  | conserved  | conserved |
| APPBP2  | 1.65157706 | 0.64804534 | conserved  | conserved |
| APPL1   | 0.24743762 | 0.66027925 | conserved  | conserved |
| APPL2   | 2.26381082 | 1.43653576 | monkey-NSC | conserved |
| APTX    | 0.23197727 | 0.34439607 | conserved  | conserved |
| AQP11   | 0.08449157 | 0.16108947 | conserved  | conserved |
| AQP2    | 0          | 0.00270827 | conserved  | conserved |
| AQP3    | 0.02148411 | 0          | conserved  | conserved |
| AQP4    | 4.26018449 | 0.85977902 | monkey-NSC | conserved |
| AQP5    | 0.001335   | 0.00386571 | conserved  | conserved |
| AQP6    | 0.01166347 | 0          | conserved  | conserved |
| AQP8    | 0.09963329 | 0          | conserved  | conserved |
| AQP9    | 0.00304268 | 0.02953284 | conserved  | conserved |
| AQR     | 1.19833344 | 0.20981806 | conserved  | conserved |
| AR      | 0.11505223 | 0.02773064 | conserved  | conserved |
| ARAF    | 0.14258166 | 0.88472745 | conserved  | conserved |
| ARAP1   | 0.83958334 | 0.10678331 | monkey-NSC | conserved |
| ARAP2   | 3.02013939 | 1.00044488 | conserved  | conserved |
| ARAP3   | 0.04351365 | 0.00623422 | conserved  | conserved |
| ARCN1   | 0.343332   | 0.56396441 | conserved  | conserved |
| AREG    | 0          | 0.00169459 | conserved  | conserved |
| ARF5    | 0.32143758 | 5.01726903 | mouse-RGL  | conserved |
| ARF6    | 0.06440743 | 0.6296066  | conserved  | conserved |
| ARFGAP1 | 0.20125668 | 0.35416708 | conserved  | conserved |
| ARFGAP2 | 0.69491606 | 0.48183811 | conserved  | conserved |

|           |            |            |            |           |
|-----------|------------|------------|------------|-----------|
| ARFGAP3   | 0.97368344 | 0.08690426 | conserved  | conserved |
| ARFGEF1   | 1.95423761 | 0.44029032 | conserved  | conserved |
| ARFGEF2   | 1.19186581 | 0.05186325 | conserved  | conserved |
| ARFGEF3   | 2.16000601 | 0.00747931 | conserved  | conserved |
| ARFIP2    | 0.06936878 | 0.65304887 | conserved  | conserved |
| ARFRP1    | 0.18667363 | 0.66466519 | conserved  | conserved |
| ARG1      | 0          | 0          | conserved  | conserved |
| ARG2      | 0.09150348 | 0.01482795 | conserved  | conserved |
| ARHGAP1   | 1.20167651 | 0.20277957 | conserved  | conserved |
| ARHGAP10  | 0.1807305  | 0.06120478 | conserved  | conserved |
| ARHGAP11A | 0.01905246 | 0.01481356 | conserved  | conserved |
| ARHGAP12  | 1.42685172 | 0.38346263 | conserved  | conserved |
| ARHGAP15  | 0.22281084 | 0.01687633 | conserved  | conserved |
| ARHGAP17  | 0.70753015 | 0.22485811 | conserved  | conserved |
| ARHGAP18  | 0.15109172 | 0.05045731 | conserved  | conserved |
| ARHGAP20  | 0.70059043 | 0.08400841 | conserved  | conserved |
| ARHGAP21  | 3.05323274 | 0.63808981 | conserved  | conserved |
| ARHGAP24  | 1.10925748 | 0.00945495 | conserved  | conserved |
| ARHGAP25  | 0.02487816 | 0          | conserved  | conserved |
| ARHGAP26  | 11.8262467 | 0.15468689 | monkey-NSC | conserved |
| ARHGAP27  | 0.00785985 | 0          | conserved  | conserved |
| ARHGAP28  | 0.21308909 | 0.00698602 | conserved  | conserved |
| ARHGAP29  | 0.35241899 | 0.01943805 | conserved  | conserved |
| ARHGAP30  | 0.01173507 | 0          | conserved  | conserved |
| ARHGAP31  | 3.22135787 | 0.30264743 | conserved  | conserved |
| ARHGAP32  | 7.25197869 | 0.19845154 | monkey-NSC | conserved |
| ARHGAP35  | 3.14927967 | 0.30658665 | conserved  | conserved |
| ARHGAP36  | 0.01232816 | 0.00093514 | conserved  | conserved |
| ARHGAP4   | 0.12517981 | 0.02368473 | conserved  | conserved |
| ARHGAP42  | 1.9048633  | 0.15031326 | conserved  | conserved |
| ARHGAP44  | 0.51274816 | 0.09562976 | conserved  | conserved |
| ARHGAP5   | 4.55667046 | 2.36517475 | monkey-NSC | conserved |
| ARHGAP6   | 0.84304463 | 0          | conserved  | conserved |
| ARHGAP9   | 0.00866364 | 0.00359136 | conserved  | conserved |
| ARHGEF1   | 0.35279239 | 0.33754698 | conserved  | conserved |
| ARHGEF10  | 1.05546708 | 0.12994112 | conserved  | conserved |
| ARHGEF10L | 3.59647706 | 0.14363465 | monkey-NSC | conserved |
| ARHGEF11  | 1.62585579 | 0.11637676 | conserved  | conserved |
| ARHGEF12  | 4.4011037  | 0.32522864 | monkey-NSC | conserved |
| ARHGEF15  | 0.02042141 | 0.00404961 | conserved  | conserved |
| ARHGEF16  | 0.00558677 | 0          | conserved  | conserved |

|          |            |            |            |           |
|----------|------------|------------|------------|-----------|
| ARHGEF19 | 0.00670893 | 0.09273699 | conserved  | conserved |
| ARHGEF2  | 0.37103069 | 0.35341993 | conserved  | conserved |
| ARHGEF26 | 3.08555555 | 1.4826701  | conserved  | conserved |
| ARHGEF28 | 0.28636749 | 0.02145047 | conserved  | conserved |
| ARHGEF3  | 1.45064615 | 0.043701   | monkey-NSC | conserved |
| ARHGEF33 | 0.44194746 | 0.01422469 | conserved  | conserved |
| ARHGEF37 | 0.13534845 | 0          | conserved  | conserved |
| ARHGEF39 | 0.00268623 | 0          | conserved  | conserved |
| ARHGEF40 | 0.35609454 | 0.43636919 | conserved  | conserved |
| ARHGEF5  | 0.0445266  | 0.01087295 | conserved  | conserved |
| ARHGEF6  | 0.88139311 | 0.05926894 | conserved  | conserved |
| ARHGEF7  | 2.78265962 | 0.39570434 | conserved  | conserved |
| ARHGEF9  | 0.88824394 | 0.41509509 | conserved  | conserved |
| ARID1A   | 2.98358053 | 1.08801606 | conserved  | conserved |
| ARID1B   | 9.89640802 | 0.36014457 | conserved  | conserved |
| ARID2    | 2.36746389 | 0.50447613 | conserved  | conserved |
| ARID3A   | 0.03550876 | 0.03782466 | conserved  | conserved |
| ARID3B   | 0.36808433 | 0.01502497 | conserved  | conserved |
| ARID4A   | 1.38185631 | 0.49454277 | conserved  | conserved |
| ARID4B   | 3.27112819 | 0.76647836 | conserved  | conserved |
| ARID5A   | 0.07517567 | 0.25112223 | conserved  | conserved |
| ARID5B   | 2.40221821 | 0.14899412 | monkey-NSC | conserved |
| ARIH1    | 2.10688231 | 0.33207684 | conserved  | conserved |
| ARL1     | 0.08204365 | 1.19899446 | conserved  | conserved |
| ARL10    | 0.18341484 | 0.06518995 | conserved  | conserved |
| ARL13A   | 0.02171508 | 0          | conserved  | conserved |
| ARL13B   | 0.73153958 | 0.15932069 | conserved  | conserved |
| ARL14EP  | 0.30611562 | 0.43338158 | conserved  | conserved |
| ARL14EPL | 0.00493788 | 0          | conserved  | conserved |
| ARL15    | 2.50937877 | 0.06850976 | monkey-NSC | conserved |
| ARL2     | 0.21622672 | 0.6735395  | conserved  | conserved |
| ARL3     | 1.06540704 | 1.89933179 | conserved  | conserved |
| ARL4D    | 0.00627998 | 0.01774841 | conserved  | conserved |
| ARL5B    | 0.07552441 | 0.21105102 | conserved  | conserved |
| ARL6     | 0.76577648 | 0.78118607 | conserved  | conserved |
| ARL6IP4  | 0.04862531 | 0.68623511 | conserved  | conserved |
| ARL8A    | 0.43333186 | 1.92317545 | conserved  | conserved |
| ARL8B    | 0.82516171 | 0.78295039 | conserved  | conserved |
| ARMC1    | 0.3269024  | 1.27695116 | mouse-RGL  | conserved |
| ARMC10   | 0.34639981 | 0.2846397  | conserved  | conserved |
| ARMC2    | 2.01610643 | 0.06580794 | monkey-NSC | conserved |



|        |            |            |            |           |
|--------|------------|------------|------------|-----------|
| ARMC3  | 0.01747123 | 0.01471176 | conserved  | conserved |
| ARMC5  | 0.01656355 | 0.12185271 | conserved  | conserved |
| ARMC6  | 0.05666992 | 0.14765639 | conserved  | conserved |
| ARMC8  | 1.56193624 | 0.35154254 | conserved  | conserved |
| ARMC9  | 1.7596038  | 0.19025504 | conserved  | conserved |
| ARMCX1 | 0.11532198 | 0.23805838 | conserved  | conserved |
| ARMCX5 | 0.07063185 | 0.16870698 | conserved  | conserved |
| ARMCX6 | 0.02789881 | 0.12422539 | conserved  | conserved |
| ARNT   | 0.99667286 | 0.24166346 | conserved  | conserved |
| ARNT2  | 3.61145112 | 0.10067562 | monkey-NSC | conserved |
| ARNTL  | 0.56349152 | 0.3591123  | conserved  | conserved |
| ARNTL2 | 0.20059236 | 0.00614252 | conserved  | conserved |
| ARPC2  | 0.84600838 | 2.51880422 | mouse-RGL  | conserved |
| ARPC5L | 0.12464762 | 1.39851875 | conserved  | conserved |
| ARPP19 | 0.37545885 | 2.31061967 | conserved  | conserved |
| ARPP21 | 3.27116918 | 0.12154234 | conserved  | conserved |
| ARR3   | 0.00103414 | 0          | conserved  | conserved |
| ARRB1  | 4.57854168 | 0.51147888 | monkey-NSC | conserved |
| ARRB2  | 0.14230034 | 0.19401169 | conserved  | conserved |
| ARRDC1 | 0.08320862 | 0.07385103 | conserved  | conserved |
| ARRDC2 | 0.01329291 | 0.09013546 | conserved  | conserved |
| ARRDC3 | 0.18140706 | 0.24577687 | conserved  | conserved |
| ARSA   | 0.23274871 | 0.12314679 | conserved  | conserved |
| ARSB   | 1.44524905 | 0.3268576  | conserved  | conserved |
| ARSJ   | 0.80671658 | 0.00885985 | conserved  | conserved |
| ARSK   | 0.27689939 | 0.2642664  | conserved  | conserved |
| ART1   | 0.00274746 | 0.0259531  | conserved  | conserved |
| ART3   | 0.01654348 | 0.01542555 | conserved  | conserved |
| ART4   | 0.00524036 | 0          | conserved  | conserved |
| ART5   | 0.00233864 | 0.0108434  | conserved  | conserved |
| ARTN   | 0.00683822 | 0          | conserved  | conserved |
| ARV1   | 0.16470052 | 0.08213335 | conserved  | conserved |
| ARVCF  | 0.24800264 | 0.32648852 | conserved  | conserved |
| AS3MT  | 0.31839588 | 0.0874842  | conserved  | conserved |
| ASAH1  | 0.26413455 | 0.54538065 | conserved  | conserved |
| ASAP1  | 4.90570823 | 0.3616082  | conserved  | conserved |
| ASAP2  | 3.10434298 | 0.51950325 | conserved  | conserved |
| ASAP3  | 0.77614288 | 0.00628453 | conserved  | conserved |
| ASB1   | 0.25646735 | 0.07372485 | conserved  | conserved |
| ASB11  | 0.01459575 | 0          | conserved  | conserved |
| ASB13  | 0.08562566 | 0.28250616 | conserved  | conserved |

|         |            |            |            |           |
|---------|------------|------------|------------|-----------|
| ASB14   | 0.0856539  | 0          | conserved  | conserved |
| ASB15   | 0          | 0          | conserved  | conserved |
| ASB16   | 0.03223167 | 0.00398434 | conserved  | conserved |
| ASB2    | 0.03676005 | 0          | conserved  | conserved |
| ASB3    | 13.1164022 | 0.26944798 | conserved  | conserved |
| ASB4    | 0.00281646 | 0.02503733 | conserved  | conserved |
| ASB5    | 0.04561254 | 0.0255394  | conserved  | conserved |
| ASB6    | 0.04904502 | 0.1336719  | conserved  | conserved |
| ASB7    | 0.27612269 | 0.29630914 | conserved  | conserved |
| ASB8    | 0.14411965 | 0.26583739 | conserved  | conserved |
| ASCC1   | 1.56408987 | 0.25026896 | conserved  | conserved |
| ASCC3   | 1.77464606 | 0.09577119 | conserved  | conserved |
| ASF1A   | 0.06682961 | 1.21611939 | mouse-RGL  | conserved |
| ASF1B   | 0.03135869 | 0.04971582 | conserved  | conserved |
| ASGR1   | 0.05881364 | 0          | conserved  | conserved |
| ASH1L   | 8.30582151 | 1.34193258 | conserved  | conserved |
| ASH2L   | 0.82371068 | 0.47888817 | conserved  | conserved |
| ASIC1   | 0.14951563 | 0.05299076 | conserved  | conserved |
| ASIC2   | 2.95997951 | 0.02973735 | monkey-NSC | conserved |
| ASIC3   | 0.02885442 | 0.0040637  | conserved  | conserved |
| ASIC4   | 0.00693591 | 0.00489356 | conserved  | conserved |
| ASNS    | 0.08116569 | 0.06402697 | conserved  | conserved |
| ASPDH   | 0          | 0.0066476  | conserved  | conserved |
| ASPG    | 0          | 0.0074773  | conserved  | conserved |
| ASPH    | 5.05224442 | 0.68071135 | conserved  | conserved |
| ASPHD1  | 0.02511306 | 0.01320245 | conserved  | conserved |
| ASPHD2  | 0.02940205 | 0.61788429 | conserved  | conserved |
| ASPM    | 0.0286402  | 0.01226776 | conserved  | conserved |
| ASPN    | 0.00811671 | 0          | conserved  | conserved |
| ASPRV1  | 0          | 0.01395171 | conserved  | conserved |
| ASPSCR1 | 0.50238816 | 0.54230362 | conserved  | conserved |
| ASRGL1  | 0.67610671 | 2.13780437 | conserved  | conserved |
| ASTE1   | 0.0769731  | 0.05369615 | conserved  | conserved |
| ASTN1   | 5.21378528 | 0.68590249 | conserved  | conserved |
| ASTN2   | 7.02126053 | 0.0225134  | monkey-NSC | conserved |
| ASXL1   | 1.45880073 | 0.20653179 | conserved  | conserved |
| ASXL2   | 1.52431059 | 0.51439315 | conserved  | conserved |
| ASXL3   | 0.37220053 | 0.05373224 | conserved  | conserved |
| ASZ1    | 0.00089681 | 0          | conserved  | conserved |
| ATAD2B  | 3.31385793 | 0.1501538  | conserved  | conserved |
| ATAD5   | 0.15812548 | 0.11527923 | conserved  | conserved |

|         |            |            |            |                      |
|---------|------------|------------|------------|----------------------|
| ATCAY   | 0.31050293 | 0.17946194 | conserved  | conserved            |
| ATE1    | 2.0649057  | 0.34798263 | monkey-NSC | conserved            |
| ATF1    | 0.96932631 | 0.41580148 | conserved  | conserved            |
| ATF2    | 1.13433718 | 0.4697327  | conserved  | conserved            |
| ATF6    | 0.76188954 | 0.11592643 | conserved  | conserved            |
| ATF6B   | 0.4729572  | 0.38684419 | conserved  | conserved            |
| ATF7IP2 | 0.38248437 | 0          | conserved  | conserved            |
| ATG10   | 1.45036028 | 0.09480899 | conserved  | conserved            |
| ATG101  | 0.0924398  | 0.61793429 | conserved  | conserved            |
| ATG13   | 0.76884848 | 0.1340345  | conserved  | conserved            |
| ATG16L1 | 0.23420517 | 0.13282117 | conserved  | conserved            |
| ATG2A   | 0.26214185 | 0.16776292 | conserved  | conserved            |
| ATG2B   | 0.82969702 | 0.1833613  | conserved  | conserved            |
| ATG3    | 0.23740351 | 0.82820348 | conserved  | conserved            |
| ATG4B   | 0.63629185 | 0.23136091 | conserved  | conserved            |
| ATG4C   | 0.69578938 | 0.10186786 | conserved  | conserved            |
| ATG5    | 0.61710964 | 0.5472514  | conserved  | conserved            |
| ATG7    | 4.29717195 | 0.57672408 | conserved  | conserved            |
| ATIC    | 0.30303024 | 0.3176875  | conserved  | conserved            |
| ATL1    | 0.6192301  | 0.10157864 | conserved  | conserved            |
| ATL2    | 1.5201787  | 0.50947249 | conserved  | conserved            |
| ATL3    | 0.46109932 | 0.10599482 | conserved  | conserved            |
| ATM     | 1.04920059 | 0.18650495 | conserved  | conserved            |
| ATMIN   | 0.14175436 | 0.07296151 | conserved  | conserved            |
| ATOH8   | 0.16308551 | 0.04229953 | conserved  | conserved            |
| ATOX1   | 0.1354271  | 3.35880219 | mouse-RGL  | conserved            |
| ATP10B  | 1.89591214 | 0.00891219 | monkey-NSC | monkey-NSC1-enriched |
| ATP11A  | 0.93998545 | 0.21089193 | conserved  | conserved            |
| ATP11B  | 0.94313446 | 0.25419464 | conserved  | conserved            |
| ATP11C  | 0.23413511 | 0.09903459 | conserved  | conserved            |
| ATP12A  | 0.00409751 | 0          | conserved  | conserved            |
| ATP13A1 | 0.17383883 | 0.09612054 | conserved  | conserved            |
| ATP13A2 | 0.79924104 | 0.40196718 | conserved  | conserved            |
| ATP13A3 | 0.58303171 | 0.2235367  | conserved  | conserved            |
| ATP13A4 | 8.59578774 | 0.0462676  | monkey-NSC | conserved            |
| ATP13A5 | 0.20851982 | 0.00626387 | conserved  | conserved            |
| ATP1A1  | 0.59589161 | 0.95727991 | conserved  | conserved            |
| ATP1B1  | 1.76788441 | 2.05716426 | conserved  | conserved            |
| ATP1B2  | 1.11670917 | 3.69581068 | monkey-NSC | conserved            |
| ATP2A1  | 0.12340359 | 0          | conserved  | conserved            |
| ATP2A2  | 1.98376189 | 1.38906077 | conserved  | conserved            |

|          |            |            |            |           |
|----------|------------|------------|------------|-----------|
| ATP2A3   | 0.01353753 | 0          | conserved  | conserved |
| ATP2B1   | 1.95985737 | 0.98411288 | conserved  | conserved |
| ATP2B2   | 0.80530896 | 0.12062133 | conserved  | conserved |
| ATP2B4   | 0.79756173 | 0.0734585  | conserved  | conserved |
| ATP2C1   | 2.18337941 | 0.60212898 | conserved  | conserved |
| ATP2C2   | 0.02865241 | 0          | conserved  | conserved |
| ATP4A    | 0.0163627  | 0.01952229 | conserved  | conserved |
| ATP6AP1  | 0.26899435 | 0.44144298 | conserved  | conserved |
| ATP6AP2  | 0.36317996 | 0.57593933 | conserved  | conserved |
| ATP6V0A1 | 2.78887408 | 0.2915563  | conserved  | conserved |
| ATP6V0A2 | 0.34540587 | 0.2595037  | conserved  | conserved |
| ATP6V0A4 | 0.01529566 | 0.00305671 | conserved  | conserved |
| ATP6V0D1 | 0.32827139 | 1.24916878 | conserved  | conserved |
| ATP6V0D2 | 0.00200116 | 0          | conserved  | conserved |
| ATP6V1B1 | 0.01270566 | 0          | conserved  | conserved |
| ATP6V1B2 | 0.43309836 | 0.46822432 | conserved  | conserved |
| ATP6V1C1 | 0.29198214 | 0.51659357 | conserved  | conserved |
| ATP6V1C2 | 0.03702467 | 0          | conserved  | conserved |
| ATP6V1G1 | 0.16681618 | 4.44875049 | mouse-RGL  | conserved |
| ATP6V1G3 | 0          | 0          | conserved  | conserved |
| ATP6V1H  | 4.49043669 | 0.41461818 | conserved  | conserved |
| ATP7A    | 0.41160317 | 0.06526392 | conserved  | conserved |
| ATP7B    | 0.20061501 | 0.0662892  | conserved  | conserved |
| ATP8A1   | 3.2856282  | 0.35148076 | conserved  | conserved |
| ATP8A2   | 1.97619179 | 0.00311448 | monkey-NSC | conserved |
| ATP8B1   | 0.1927624  | 0.00887954 | conserved  | conserved |
| ATP8B2   | 0.75762535 | 0.00121328 | conserved  | conserved |
| ATP8B3   | 0.02425579 | 0.0062314  | conserved  | conserved |
| ATP8B4   | 0.13892963 | 0          | conserved  | conserved |
| ATP9A    | 1.75831093 | 0.34507249 | conserved  | conserved |
| ATP9B    | 3.22866264 | 0.14477846 | conserved  | conserved |
| ATR      | 0.95663179 | 0.28469315 | conserved  | conserved |
| ATRAID   | 0.28786012 | 2.2226034  | mouse-RGL  | conserved |
| ATRIP    | 0.07642398 | 0.01327619 | conserved  | conserved |
| ATRN     | 2.19775934 | 0.43172193 | conserved  | conserved |
| ATRNL1   | 2.12759081 | 0.04770195 | conserved  | conserved |
| ATRX     | 2.97189117 | 1.63385089 | conserved  | conserved |
| ATXN1    | 4.66461975 | 0.57446656 | monkey-NSC | conserved |
| ATXN10   | 2.65181858 | 1.71008438 | conserved  | conserved |
| ATXN1L   | 0.06432428 | 0.09811387 | conserved  | conserved |
| ATXN2    | 5.55407539 | 0.46482895 | conserved  | conserved |

|          |            |            |            |           |
|----------|------------|------------|------------|-----------|
| ATXN2L   | 0.55131585 | 0.41447328 | conserved  | conserved |
| ATXN7L1  | 3.62122178 | 0.18906957 | conserved  | conserved |
| ATXN7L2  | 0.01645847 | 0.13743571 | conserved  | conserved |
| ATXN7L3  | 0.15198785 | 0.16171212 | conserved  | conserved |
| AUH      | 2.32874867 | 0.31293646 | conserved  | conserved |
| AUNIP    | 0.07710655 | 0.02855876 | conserved  | conserved |
| AURKA    | 0.01517815 | 0.02644156 | conserved  | conserved |
| AURKB    | 0.0017544  | 0.00973027 | conserved  | conserved |
| AUTS2    | 25.3889878 | 0.86845153 | conserved  | conserved |
| AVEN     | 0.41573697 | 0.02419322 | conserved  | conserved |
| AVIL     | 0.18736129 | 0.00296916 | conserved  | conserved |
| AVL9     | 3.01444219 | 0.26728864 | conserved  | conserved |
| AVP      | 0.02686367 | 0          | conserved  | conserved |
| AVPR1A   | 0.00743974 | 0          | conserved  | conserved |
| AVPR1B   | 0          | 0          | conserved  | conserved |
| AVPR2    | 0.00061884 | 0          | conserved  | conserved |
| AXDND1   | 0.1349442  | 0.02325654 | conserved  | conserved |
| AXIN1    | 0.47996811 | 0.13375148 | conserved  | conserved |
| AXL      | 0.73569778 | 0.61685619 | conserved  | conserved |
| AZGP1    | 0.00141658 | 0          | conserved  | conserved |
| AZI2     | 0.22902016 | 0.41732773 | conserved  | conserved |
| AZIN1    | 0.4874792  | 1.19796298 | conserved  | conserved |
| AZIN2    | 0.18888159 | 0.12069096 | conserved  | conserved |
| B2M      | 0.03787378 | 0.62874081 | conserved  | conserved |
| B3GALNT2 | 1.10592964 | 0.05803366 | monkey-NSC | conserved |
| B3GALT1  | 0.13616592 | 0.2434816  | conserved  | conserved |
| B3GALT2  | 0.04696716 | 0.13708636 | conserved  | conserved |
| B3GALT5  | 0.08047345 | 0.0296169  | conserved  | conserved |
| B3GAT1   | 0.74845733 | 0.35083118 | conserved  | conserved |
| B3GAT2   | 0.09187641 | 0.3649592  | conserved  | conserved |
| B3GAT3   | 0.34995908 | 0.28905404 | conserved  | conserved |
| B3GLCT   | 0.1954022  | 0.4565463  | conserved  | conserved |
| B3GNT2   | 0.02462637 | 0          | conserved  | conserved |
| B3GNT4   | 0.04172304 | 0.07154519 | conserved  | conserved |
| B3GNT5   | 0.05144489 | 0.1080636  | conserved  | conserved |
| B3GNT7   | 0.00094024 | 0          | conserved  | conserved |
| B3GNT8   | 0.00162903 | 0.00243806 | conserved  | conserved |
| B3GNT9   | 0.00391242 | 0          | conserved  | conserved |
| B4GALNT1 | 0.02917146 | 0.04761585 | conserved  | conserved |
| B4GALNT2 | 0.0250463  | 0          | conserved  | conserved |
| B4GALNT3 | 0.49247349 | 0          | conserved  | conserved |

|          |            |            |            |           |
|----------|------------|------------|------------|-----------|
| B4GALNT4 | 0.28343911 | 0.02441671 | conserved  | conserved |
| B4GALT2  | 0.11007101 | 0.18191253 | conserved  | conserved |
| B4GALT3  | 0.05414522 | 0.30191244 | conserved  | conserved |
| B4GALT5  | 0.8177202  | 0.14684185 | conserved  | conserved |
| B4GALT6  | 0.41800697 | 0.47597934 | conserved  | conserved |
| B4GALT7  | 0.03340855 | 0.25262706 | conserved  | conserved |
| B9D2     | 0.06021905 | 0.47086187 | conserved  | conserved |
| BAALC    | 3.07215532 | 0.22161747 | monkey-NSC | conserved |
| BABAM1   | 0.33884295 | 0.55586651 | conserved  | conserved |
| BACE1    | 0.42705139 | 0.28982966 | conserved  | conserved |
| BACE2    | 0.08585546 | 0.00857185 | conserved  | conserved |
| BACH1    | 0.18068406 | 0.13948399 | conserved  | conserved |
| BACH2    | 1.17938619 | 0.48426307 | conserved  | conserved |
| BAD      | 0.1542267  | 1.07776797 | conserved  | conserved |
| BAG3     | 0.15894169 | 0.13554181 | conserved  | conserved |
| BAG4     | 0.32452412 | 0.2310394  | conserved  | conserved |
| BAG5     | 0.09612434 | 0.29888249 | conserved  | conserved |
| BAG6     | 0.16664647 | 0.51972182 | conserved  | conserved |
| BAHD1    | 0.24545085 | 0.0505921  | conserved  | conserved |
| BAIAP2   | 0.69978741 | 0.17668383 | conserved  | conserved |
| BAIAP2L1 | 0.01398528 | 0          | conserved  | conserved |
| BAMBI    | 0.0135484  | 0.18214448 | conserved  | conserved |
| BANF2    | 0.0010904  | 0          | conserved  | conserved |
| BANK1    | 0.17770653 | 0          | conserved  | conserved |
| BANP     | 0.86735898 | 0.23920923 | conserved  | conserved |
| BAP1     | 0.09083149 | 0.34453168 | conserved  | conserved |
| BARD1    | 0.06968284 | 0.00998887 | conserved  | conserved |
| BARHL2   | 0          | 0          | conserved  | conserved |
| BATF     | 0.00951206 | 0.00222764 | conserved  | conserved |
| BATF2    | 0.06831075 | 0          | conserved  | conserved |
| BAZ1B    | 1.26708381 | 0.49744333 | conserved  | conserved |
| BAZ2B    | 3.14574292 | 0.62473903 | monkey-NSC | conserved |
| BBOF1    | 0.48549396 | 0.0986056  | conserved  | conserved |
| BBOX1    | 1.90607569 | 0.00393313 | conserved  | conserved |
| BBS4     | 0.64219969 | 0.10677276 | conserved  | conserved |
| BBS7     | 0.34957623 | 0.06007172 | conserved  | conserved |
| BBS9     | 1.20702128 | 0.0542138  | conserved  | conserved |
| BBX      | 2.00207611 | 0.55235371 | conserved  | conserved |
| BCAM     | 0.25575082 | 0.01720259 | conserved  | conserved |
| BCAN     | 3.04166054 | 1.97419988 | monkey-NSC | conserved |
| BCAP31   | 0.20711882 | 0.51960112 | conserved  | conserved |

|         |            |            |            |           |
|---------|------------|------------|------------|-----------|
| BCAR1   | 0.20200357 | 0.10574595 | conserved  | conserved |
| BCAR3   | 1.51813504 | 0.2435924  | conserved  | conserved |
| BCAS1   | 0.27010718 | 0.03397672 | conserved  | conserved |
| BCAS2   | 0.25672614 | 1.86534233 | mouse-RGL  | conserved |
| BCAS3   | 5.95667919 | 0.28946135 | monkey-NSC | conserved |
| BCAT1   | 0.20888809 | 0.22526724 | conserved  | conserved |
| BCAT2   | 0.83352636 | 0.1093319  | conserved  | conserved |
| BCHE    | 0.04234332 | 0.01335783 | conserved  | conserved |
| BCKDHB  | 1.25133695 | 0.26745651 | conserved  | conserved |
| BCKDK   | 0.07407745 | 0.60484208 | conserved  | conserved |
| BCL10   | 0.06534164 | 0.70393874 | mouse-RGL  | conserved |
| BCL2    | 1.9618999  | 2.12045455 | conserved  | conserved |
| BCL2L1  | 0.61612478 | 0.41906234 | conserved  | conserved |
| BCL2L11 | 0.04531669 | 0.13752996 | conserved  | conserved |
| BCL2L13 | 0.94827461 | 0.27469452 | conserved  | conserved |
| BCL2L14 | 0.0709906  | 0          | conserved  | conserved |
| BCL2L15 | 0          | 0          | conserved  | conserved |
| BCL6    | 1.19214058 | 0.06894552 | conserved  | conserved |
| BCL6B   | 0.00094281 | 0.01122506 | conserved  | conserved |
| BCL7A   | 0.32952971 | 0.59733687 | conserved  | conserved |
| BCL7B   | 0.3682908  | 0.36443504 | conserved  | conserved |
| BCL9    | 0.19025272 | 0.50307758 | conserved  | conserved |
| BCL9L   | 0.15712891 | 0.1916425  | conserved  | conserved |
| BCO1    | 0.08395422 | 0.0034067  | conserved  | conserved |
| BCO2    | 0.13092589 | 0.02920121 | conserved  | conserved |
| BCOR    | 0.08453564 | 0.10708808 | conserved  | conserved |
| BCORL1  | 0.22550254 | 0.05906901 | conserved  | conserved |
| BCR     | 3.12676579 | 0.27842875 | monkey-NSC | conserved |
| BCS1L   | 0.02660232 | 0.11460157 | conserved  | conserved |
| BDH1    | 0.34863314 | 0.41519635 | conserved  | conserved |
| BDH2    | 0.34165816 | 0.22357714 | conserved  | conserved |
| BDKRB2  | 0.01760971 | 0          | conserved  | conserved |
| BDNF    | 0.4389946  | 0.13596685 | conserved  | conserved |
| BDP1    | 2.07801829 | 0.21427232 | conserved  | conserved |
| BECN1   | 0.19005259 | 0.53493011 | conserved  | conserved |
| BEGAIN  | 0.65304837 | 0.0132954  | conserved  | conserved |
| BEND4   | 0.01793064 | 0.01586882 | conserved  | conserved |
| BEST1   | 0.01573017 | 0.00373213 | conserved  | conserved |
| BEST3   | 0.04965841 | 0          | conserved  | conserved |
| BFAR    | 0.65999668 | 0.56347252 | conserved  | conserved |
| BFSP1   | 0.01371857 | 0.00521461 | conserved  | conserved |

|         |            |            |            |           |
|---------|------------|------------|------------|-----------|
| BFSP2   | 0.03021616 | 0.00707582 | conserved  | conserved |
| BGN     | 0.0058556  | 0.21444568 | conserved  | conserved |
| BHLHE40 | 0.42050011 | 0.34692547 | conserved  | conserved |
| BICC1   | 1.31143578 | 0.14126423 | monkey-NSC | conserved |
| BICD1   | 4.85997589 | 0.55643832 | conserved  | conserved |
| BID     | 0.23353589 | 0.10824858 | conserved  | conserved |
| BIN1    | 0.26107975 | 0.38153126 | conserved  | conserved |
| BIN2    | 0.03409398 | 0          | conserved  | conserved |
| BIN3    | 0.30038029 | 0.10537944 | conserved  | conserved |
| BIRC2   | 0.31536793 | 0.2364914  | conserved  | conserved |
| BIRC6   | 5.68804626 | 0.60005949 | conserved  | conserved |
| BLCAP   | 0.02843726 | 0.5935443  | conserved  | conserved |
| BLK     | 0          | 0          | conserved  | conserved |
| BLM     | 1.52849395 | 0.08702611 | monkey-NSC | conserved |
| BLMH    | 0.35296466 | 0.7199301  | conserved  | conserved |
| BLNK    | 0.09538945 | 0          | conserved  | conserved |
| BLOC1S6 | 0.15707513 | 0.26727995 | conserved  | conserved |
| BLVRA   | 0.52919794 | 0.30292225 | conserved  | conserved |
| BLVRB   | 0.20112192 | 0.6029578  | conserved  | conserved |
| BLZF1   | 0.09061252 | 0.29784201 | conserved  | conserved |
| BMF     | 0.00199522 | 0.00265568 | conserved  | conserved |
| BMP1    | 0.13559304 | 0.19506761 | conserved  | conserved |
| BMP15   | 0          | 0          | conserved  | conserved |
| BMP2    | 0.0776669  | 0.00281196 | conserved  | conserved |
| BMP2K   | 3.66392009 | 0.22119299 | conserved  | conserved |
| BMP3    | 0          | 0.03704074 | conserved  | conserved |
| BMP4    | 0.00450696 | 0.01212075 | conserved  | conserved |
| BMP6    | 0.06417741 | 0          | conserved  | conserved |
| BMP7    | 2.85880149 | 0.06634306 | conserved  | conserved |
| BMPER   | 0.5322229  | 0.24329045 | conserved  | conserved |
| BMPR1A  | 1.34498704 | 0.86451567 | conserved  | conserved |
| BMPR1B  | 3.16277858 | 0.1084057  | monkey-NSC | conserved |
| BMPR2   | 4.05793661 | 0.57544292 | conserved  | conserved |
| BMX     | 0.01906239 | 0          | conserved  | conserved |
| BNC1    | 0          | 0          | conserved  | conserved |
| BNC2    | 1.05755408 | 0.01175243 | conserved  | conserved |
| BNIP1   | 0.15714885 | 0.24367391 | conserved  | conserved |
| BNIP2   | 0.19232304 | 0.42322994 | conserved  | conserved |
| BNIP3L  | 0.39250857 | 2.80508134 | conserved  | conserved |
| BOC     | 1.98280673 | 0.13387814 | monkey-NSC | conserved |
| BOLA3   | 0.14028587 | 1.26817282 | mouse-RGL  | conserved |



|        |            |            |            |           |
|--------|------------|------------|------------|-----------|
| BOLL   | 0.00912981 | 0          | conserved  | conserved |
| BOP1   | 0.08381042 | 0.15994534 | conserved  | conserved |
| BORA   | 0.03783242 | 0.02365285 | conserved  | conserved |
| BORCS5 | 1.20645472 | 0.24097183 | conserved  | conserved |
| BPHL   | 0.58336304 | 0.66799324 | conserved  | conserved |
| BPI    | 0.01862393 | 0          | conserved  | conserved |
| BPIFA3 | 0          | 0          | conserved  | conserved |
| BPIFB3 | 0          | 0          | conserved  | conserved |
| BPIFB4 | 0          | 0          | conserved  | conserved |
| BPIFC  | 0.12367053 | 0          | conserved  | conserved |
| BPNT1  | 0.2421104  | 0.30362717 | conserved  | conserved |
| BPTF   | 4.42771639 | 1.33877307 | conserved  | conserved |
| BRAF   | 3.48670072 | 0.24172661 | conserved  | conserved |
| BRAP   | 0.52158057 | 0.26644382 | conserved  | conserved |
| BRAT1  | 0.37104673 | 0.07748575 | conserved  | conserved |
| BRCA1  | 0.1773842  | 0.02818943 | conserved  | conserved |
| BRCA2  | 0.04091454 | 0.09502079 | conserved  | conserved |
| BRD1   | 0.65308142 | 0.13095192 | conserved  | conserved |
| BRD3   | 0.55809217 | 0.79814905 | conserved  | conserved |
| BRD7   | 0.43290213 | 0.74405669 | conserved  | conserved |
| BRD8   | 0.58161562 | 0.8766915  | conserved  | conserved |
| BRD9   | 0.38773642 | 0.59432594 | conserved  | conserved |
| BRDT   | 0.01852668 | 0.11664956 | conserved  | conserved |
| BRF1   | 0.84604818 | 0.17023602 | conserved  | conserved |
| BRF2   | 0.08713372 | 0.09625124 | conserved  | conserved |
| BRI3BP | 0.17385215 | 0.5137125  | conserved  | conserved |
| BRICD5 | 0.00376893 | 0.14132727 | conserved  | conserved |
| BRINP1 | 2.58497143 | 0.08963822 | monkey-NSC | conserved |
| BRINP2 | 0.94624923 | 0.04496941 | conserved  | conserved |
| BRINP3 | 2.83750206 | 0.01876745 | monkey-NSC | conserved |
| BRIP1  | 0.03469748 | 0.01083933 | conserved  | conserved |
| BRIX1  | 0.06953426 | 0.46324655 | conserved  | conserved |
| BRMS1  | 0.03760134 | 0.22607545 | conserved  | conserved |
| BRMS1L | 0.34681617 | 0.30652404 | conserved  | conserved |
| BROX   | 0.18372103 | 0.42461783 | conserved  | conserved |
| BRPF1  | 0.06698941 | 0.15352764 | conserved  | conserved |
| BRWD1  | 2.36597483 | 0.73065973 | conserved  | conserved |
| BRWD3  | 0.8274996  | 0.16519572 | conserved  | conserved |
| BSCL2  | 0.53205906 | 0.4224036  | conserved  | conserved |
| BSDC1  | 0.8818466  | 0.29225495 | conserved  | conserved |
| BSN    | 0.59829229 | 0.08289226 | conserved  | conserved |

|         |            |            |           |           |
|---------|------------|------------|-----------|-----------|
| BSPRY   | 0.01603494 | 0.0096477  | conserved | conserved |
| BST1    | 0.22800458 | 0.00861493 | conserved | conserved |
| BTA1    | 1.49898406 | 0.18796371 | conserved | conserved |
| BTBD10  | 0.66887517 | 0.29362371 | conserved | conserved |
| BTBD11  | 0.09810618 | 0.01438345 | conserved | conserved |
| BTBD16  | 0.07826559 | 0          | conserved | conserved |
| BTBD19  | 0.1175854  | 0.04006174 | conserved | conserved |
| BTBD3   | 0.49940189 | 0.17816186 | conserved | conserved |
| BTBD6   | 0.08685462 | 0.11248439 | conserved | conserved |
| BTBD7   | 1.67440994 | 0.08330005 | conserved | conserved |
| BTBD9   | 6.77085063 | 0.47534723 | conserved | conserved |
| BTC     | 0.00304092 | 0.00666347 | conserved | conserved |
| BTD     | 0.11017712 | 0.18152054 | conserved | conserved |
| BTF3L4  | 0.7344874  | 1.80383816 | mouse-RGL | conserved |
| BTG2    | 0.04839434 | 3.66104761 | mouse-RGL | conserved |
| BTG3    | 0.09154561 | 0.04952699 | conserved | conserved |
| BTG4    | 0.06704406 | 0          | conserved | conserved |
| BTLA    | 0.0193498  | 0          | conserved | conserved |
| BTN1A1  | 0          | 0          | conserved | conserved |
| BTRC    | 2.37567079 | 0.23576676 | conserved | conserved |
| BUB1    | 0.01770078 | 0          | conserved | conserved |
| BUD13   | 0.19877682 | 0.04081365 | conserved | conserved |
| BUD31   | 0.0298944  | 1.54252028 | mouse-RGL | conserved |
| BVES    | 0.04839676 | 0.00617356 | conserved | conserved |
| BYSL    | 0.02859978 | 0.12326186 | conserved | conserved |
| BZW1    | 0.12110587 | 1.52760524 | mouse-RGL | conserved |
| BZW2    | 0.19223977 | 0.93391346 | mouse-RGL | conserved |
| C1GALT1 | 0.09822715 | 0.10374498 | conserved | conserved |
| C1QC    | 0.01452134 | 0.013871   | conserved | conserved |
| C1QL1   | 0.04713336 | 0.4033893  | conserved | conserved |
| C1QL2   | 0.42064152 | 0.01527989 | conserved | conserved |
| C1QL3   | 0.23051778 | 0.08344152 | conserved | conserved |
| C1QL4   | 0          | 0          | conserved | conserved |
| C1QTNF1 | 0.00864525 | 0.00563012 | conserved | conserved |
| C1QTNF6 | 0.00621592 | 0.27345454 | conserved | conserved |
| C1QTNF7 | 0.03459326 | 0          | conserved | conserved |
| C1RL    | 0.20123838 | 0          | conserved | conserved |
| C2CD2   | 0.4621447  | 0.04374805 | conserved | conserved |
| C2CD2L  | 0.18883308 | 0.06668525 | conserved | conserved |
| C2CD3   | 1.00138811 | 0.17057831 | conserved | conserved |
| C2CD5   | 1.21098025 | 0.20163215 | conserved | conserved |

|          |            |            |            |           |
|----------|------------|------------|------------|-----------|
| C6       | 0.00691017 | 0          | conserved  | conserved |
| C7       | 0.01036695 | 0          | conserved  | conserved |
| C8A      | 0          | 0          | conserved  | conserved |
| C8B      | 0.01212552 | 0          | conserved  | conserved |
| C9       | 0.00187553 | 0          | conserved  | conserved |
| CAAP1    | 0.40022392 | 0.33461613 | conserved  | conserved |
| CAB39    | 1.39263506 | 0.63826527 | conserved  | conserved |
| CAB39L   | 0.72382305 | 0.21976359 | conserved  | conserved |
| CABIN1   | 0.89942037 | 0.26947162 | conserved  | conserved |
| CABLES2  | 0.00446687 | 0.06965167 | conserved  | conserved |
| CABP2    | 0          | 0          | conserved  | conserved |
| CABP4    | 0.09514275 | 0          | conserved  | conserved |
| CACHD1   | 2.47040105 | 0.53344591 | conserved  | conserved |
| CACNA1A  | 2.42718142 | 0.3443263  | conserved  | conserved |
| CACNA1D  | 1.09613115 | 0.03875563 | conserved  | conserved |
| CACNA1E  | 2.3901287  | 0.0407287  | conserved  | conserved |
| CACNA1F  | 0.03881347 | 0          | conserved  | conserved |
| CACNA1I  | 0.08808229 | 0          | conserved  | conserved |
| CACNA1S  | 0.07591425 | 0          | conserved  | conserved |
| CACNA2D1 | 3.67415919 | 0.13072992 | conserved  | conserved |
| CACNA2D2 | 0.04987124 | 0.03200966 | conserved  | conserved |
| CACNA2D3 | 4.84571831 | 0.05197871 | monkey-NSC | conserved |
| CACNA2D4 | 0.01982669 | 0.00816782 | conserved  | conserved |
| CACNB1   | 0.27506703 | 0.1163505  | conserved  | conserved |
| CACNB2   | 13.9053874 | 0.04765545 | monkey-NSC | conserved |
| CACNB3   | 0.12411068 | 0.1099843  | conserved  | conserved |
| CACNG1   | 0.00938478 | 0          | conserved  | conserved |
| CACNG2   | 0.37645506 | 0.0211577  | conserved  | conserved |
| CACNG3   | 0.5107213  | 0.01377011 | conserved  | conserved |
| CACNG7   | 0.42018915 | 0.34723439 | conserved  | conserved |
| CACUL1   | 0.98421624 | 0.2425233  | monkey-NSC | conserved |
| CADM1    | 19.5403702 | 0.70441875 | monkey-NSC | conserved |
| CADM2    | 62.9990877 | 0.94831148 | monkey-NSC | conserved |
| CADM3    | 0.12340098 | 0.16497068 | conserved  | conserved |
| CADM4    | 0.35567187 | 1.02655635 | conserved  | conserved |
| CADPS2   | 1.28073957 | 0.05278215 | conserved  | conserved |
| CAGE1    | 0.02070782 | 0.00698054 | conserved  | conserved |
| CALB1    | 0.12626995 | 0.08007413 | conserved  | conserved |
| CALCB    | 0.01490671 | 0          | conserved  | conserved |
| CALCOCO2 | 0.98379874 | 0          | conserved  | conserved |
| CALCRL   | 0.07125566 | 0.39066292 | conserved  | conserved |

|         |            |            |            |           |
|---------|------------|------------|------------|-----------|
| CALD1   | 1.01006188 | 1.55075485 | mouse-RGL  | conserved |
| CALHM1  | 0.00098652 | 0          | conserved  | conserved |
| CALHM2  | 0.01605417 | 0.01244101 | conserved  | conserved |
| CALM3   | 0.56972155 | 5.17962668 | mouse-RGL  | conserved |
| CALU    | 0.4901693  | 0.8096667  | conserved  | conserved |
| CALY    | 0.28162797 | 0.16296674 | conserved  | conserved |
| CAMK1   | 0.31719739 | 0.822991   | conserved  | conserved |
| CAMK1D  | 5.43148626 | 0.10421065 | monkey-NSC | conserved |
| CAMK1G  | 0.02106626 | 0.00849517 | conserved  | conserved |
| CAMK2A  | 1.6895783  | 0.29731174 | conserved  | conserved |
| CAMK2G  | 8.13403083 | 0.63038637 | conserved  | conserved |
| CAMK2N2 | 0          | 0.17207771 | conserved  | conserved |
| CAMK4   | 1.42877216 | 0.12831763 | monkey-NSC | conserved |
| CAMKK1  | 0.2705634  | 0.03980153 | conserved  | conserved |
| CAMKK2  | 0.26128324 | 0.28783773 | conserved  | conserved |
| CAMKMT  | 1.43637041 | 0.01105064 | conserved  | conserved |
| CAMKV   | 0.26125164 | 0.12125914 | conserved  | conserved |
| CAMP    | 0.00400537 | 0          | conserved  | conserved |
| CAMSAP1 | 1.02516259 | 0.41014559 | conserved  | conserved |
| CAMSAP2 | 2.61473657 | 0.27432216 | conserved  | conserved |
| CAMTA2  | 0.4967036  | 0.09622054 | conserved  | conserved |
| CAND1   | 0.69217184 | 0.47318206 | conserved  | conserved |
| CAND2   | 0.21172985 | 0.23510179 | conserved  | conserved |
| CANT1   | 0.05615251 | 0.31234805 | conserved  | conserved |
| CANX    | 0.76412766 | 2.67652307 | conserved  | conserved |
| CAP2    | 1.96815719 | 0.36335151 | conserved  | conserved |
| CAPG    | 0.01443811 | 0.03902983 | conserved  | conserved |
| CAPN10  | 0.17670482 | 0.2631166  | conserved  | conserved |
| CAPN13  | 0.00310796 | 0          | conserved  | conserved |
| CAPN2   | 0.74314531 | 0.62700481 | conserved  | conserved |
| CAPN3   | 0.31709295 | 0.01167993 | conserved  | conserved |
| CAPN5   | 0.09938023 | 0.07642559 | conserved  | conserved |
| CAPN6   | 0.0025473  | 0          | conserved  | conserved |
| CAPN7   | 1.06157737 | 0.24304618 | conserved  | conserved |
| CAPN8   | 0.04817296 | 0          | conserved  | conserved |
| CAPN9   | 0.16697227 | 0.08547934 | conserved  | conserved |
| CAPRIN1 | 0.61269757 | 1.34933474 | conserved  | conserved |
| CAPRIN2 | 0.42765478 | 0.07087654 | conserved  | conserved |
| CAPS2   | 0.13062237 | 0.03752195 | conserved  | conserved |
| CAPSL   | 0.00443275 | 0.08449679 | conserved  | conserved |
| CAPZA1  | 1.1171115  | 0.56672192 | conserved  | conserved |

|          |            |            |           |           |
|----------|------------|------------|-----------|-----------|
| CAPZA2   | 1.00383284 | 2.1508078  | conserved | conserved |
| CAPZB    | 1.63261391 | 1.50376996 | conserved | conserved |
| CARD10   | 0.00429735 | 0.01229276 | conserved | conserved |
| CARD11   | 0.0464291  | 0          | conserved | conserved |
| CARD19   | 0.23023533 | 0.27667315 | conserved | conserved |
| CARD6    | 0.04959521 | 0.00298918 | conserved | conserved |
| CARD9    | 0.02233287 | 0          | conserved | conserved |
| CARF     | 0.71143588 | 0.10922937 | conserved | conserved |
| CARHSP1  | 0.12015614 | 1.14578498 | conserved | conserved |
| CARM1    | 0.64710926 | 0.15611576 | conserved | conserved |
| CARNMT1  | 0.45640113 | 0.51372685 | conserved | conserved |
| CARNS1   | 0.02544516 | 0.03804619 | conserved | conserved |
| CARS2    | 0.73401106 | 0.11653485 | conserved | conserved |
| CARTPT   | 0.02012102 | 0          | conserved | conserved |
| CASC3    | 0.41713769 | 0.36305731 | conserved | conserved |
| CASD1    | 0.87859342 | 0.20342253 | conserved | conserved |
| CASKIN2  | 0.51194218 | 0.11842704 | conserved | conserved |
| CASP12   | 0          | 0          | conserved | conserved |
| CASP14   | 0.00115228 | 0          | conserved | conserved |
| CASP2    | 0.11571626 | 0.26108474 | conserved | conserved |
| CASP6    | 0.14733468 | 0.18273959 | conserved | conserved |
| CASP7    | 0.06607278 | 0.17730811 | conserved | conserved |
| CASP8    | 0.01212664 | 0.02987354 | conserved | conserved |
| CASP8AP2 | 0.36365392 | 0.294406   | conserved | conserved |
| CASP9    | 0.41685837 | 0.12552923 | conserved | conserved |
| CASQ2    | 0.00074462 | 0.00093514 | conserved | conserved |
| CASR     | 0.02389158 | 0          | conserved | conserved |
| CASS4    | 0.03411482 | 0          | conserved | conserved |
| CAST     | 0.43119675 | 0.00768229 | conserved | conserved |
| CAT      | 0.20987247 | 1.06473146 | conserved | conserved |
| CATIP    | 0.04130522 | 0.0291321  | conserved | conserved |
| CATSPER4 | 0.00852797 | 0          | conserved | conserved |
| CATSPERB | 0.37620983 | 0          | conserved | conserved |
| CAV1     | 0.00904721 | 0.93824579 | mouse-RGL | conserved |
| CAV2     | 0.02035647 | 0.92554629 | conserved | conserved |
| CAV3     | 0          | 0          | conserved | conserved |
| CBFA2T2  | 0.5555538  | 0.16994734 | conserved | conserved |
| CBFB     | 0.65371259 | 1.30540575 | conserved | conserved |
| CBL      | 1.0115416  | 0.58831139 | conserved | conserved |
| CBLB     | 0.73005892 | 0.19982679 | conserved | conserved |
| CBLL1    | 0.15952737 | 0.18593193 | conserved | conserved |

|          |            |            |            |           |
|----------|------------|------------|------------|-----------|
| CBLN1    | 0.00117406 | 0.00627865 | conserved  | conserved |
| CBLN2    | 0.13963805 | 0.00601443 | conserved  | conserved |
| CBLN3    | 0.00395019 | 0.00234852 | conserved  | conserved |
| CBLN4    | 0.03676477 | 0.00269521 | conserved  | conserved |
| CBR4     | 0.20680976 | 0.25087192 | conserved  | conserved |
| CBX2     | 0.01431964 | 0.0595087  | conserved  | conserved |
| CBX7     | 0.32526563 | 0.08100883 | conserved  | conserved |
| CBX8     | 0.01203869 | 0.11744303 | conserved  | conserved |
| CC2D1A   | 0.33198772 | 0.19328872 | conserved  | conserved |
| CC2D1B   | 0.2613096  | 0.10313242 | conserved  | conserved |
| CC2D2A   | 1.1814111  | 0.20598211 | conserved  | conserved |
| CCAR1    | 1.47593046 | 0.82158779 | conserved  | conserved |
| CCAR2    | 0.12719067 | 0.25250405 | conserved  | conserved |
| CCBE1    | 0.67559619 | 0.002358   | conserved  | conserved |
| CCDC102A | 0.01479533 | 0.11849844 | conserved  | conserved |
| CCDC106  | 0.04133286 | 0.32150434 | conserved  | conserved |
| CCDC107  | 0.180157   | 0.57524529 | conserved  | conserved |
| CCDC112  | 0.35736251 | 0.19373984 | conserved  | conserved |
| CCDC115  | 0.11246756 | 0.4824676  | conserved  | conserved |
| CCDC116  | 0.00074355 | 0          | conserved  | conserved |
| CCDC117  | 0.07451059 | 0.14826135 | conserved  | conserved |
| CCDC12   | 0.49646375 | 1.367202   | conserved  | conserved |
| CCDC122  | 0.12986756 | 0.23233248 | conserved  | conserved |
| CCDC124  | 0.03752765 | 1.54062519 | mouse-RGL  | conserved |
| CCDC126  | 0.13684345 | 0.11395437 | conserved  | conserved |
| CCDC127  | 0.09118395 | 0.54403976 | conserved  | conserved |
| CCDC134  | 0.20491795 | 0.07180114 | conserved  | conserved |
| CCDC136  | 0.26635192 | 0.73266549 | conserved  | conserved |
| CCDC137  | 0.09256014 | 0.25061628 | conserved  | conserved |
| CCDC138  | 1.04449121 | 0.05307784 | monkey-NSC | conserved |
| CCDC14   | 0.63339358 | 0.04006391 | conserved  | conserved |
| CCDC146  | 0.50983943 | 0.20223602 | conserved  | conserved |
| CCDC148  | 0.69473589 | 0.05391779 | conserved  | conserved |
| CCDC149  | 0.51450318 | 0.0414595  | conserved  | conserved |
| CCDC15   | 0.53078957 | 0.01540134 | conserved  | conserved |
| CCDC150  | 0.03727917 | 0          | conserved  | conserved |
| CCDC153  | 0.00327783 | 0.00356348 | conserved  | conserved |
| CCDC154  | 0.02310859 | 0          | conserved  | conserved |
| CCDC157  | 0.27064319 | 0.20710003 | conserved  | conserved |
| CCDC158  | 0.11393947 | 0.00731142 | conserved  | conserved |
| CCDC170  | 0.01616655 | 0.00269918 | conserved  | conserved |

|         |            |            |            |           |
|---------|------------|------------|------------|-----------|
| CCDC171 | 0.71434955 | 0.02856955 | conserved  | conserved |
| CCDC172 | 0.00496243 | 0          | conserved  | conserved |
| CCDC174 | 0.30690776 | 0.49837908 | conserved  | conserved |
| CCDC175 | 0.06284844 | 0          | conserved  | conserved |
| CCDC178 | 0.20006828 | 0          | conserved  | conserved |
| CCDC18  | 0.15922042 | 0.04143199 | conserved  | conserved |
| CCDC180 | 0.01347466 | 0          | conserved  | conserved |
| CCDC181 | 0.20514534 | 0.23094365 | conserved  | conserved |
| CCDC184 | 0          | 0.01404643 | conserved  | conserved |
| CCDC185 | 0          | 0          | conserved  | conserved |
| CCDC186 | 0.30096853 | 0.21887599 | conserved  | conserved |
| CCDC189 | 0.05387726 | 0.20061173 | conserved  | conserved |
| CCDC190 | 0.48341771 | 0.57478641 | conserved  | conserved |
| CCDC191 | 0.52836038 | 0.2275602  | conserved  | conserved |
| CCDC22  | 0.05257791 | 0.1023681  | conserved  | conserved |
| CCDC24  | 0.03467282 | 0          | conserved  | conserved |
| CCDC27  | 0.01846446 | 0          | conserved  | conserved |
| CCDC28A | 0.15826909 | 0.17570342 | conserved  | conserved |
| CCDC28B | 0.04533699 | 1.3673291  | mouse-RGL  | conserved |
| CCDC3   | 0.04095754 | 0.27828725 | conserved  | conserved |
| CCDC30  | 1.64728333 | 0.06230688 | monkey-NSC | conserved |
| CCDC32  | 0.17650245 | 0.41174429 | conserved  | conserved |
| CCDC33  | 0.01204154 | 0          | conserved  | conserved |
| CCDC34  | 0.18099407 | 1.95164961 | mouse-RGL  | conserved |
| CCDC38  | 0.02437618 | 0.01815363 | conserved  | conserved |
| CCDC42  | 0          | 0          | conserved  | conserved |
| CCDC43  | 0.13235333 | 0.26092716 | conserved  | conserved |
| CCDC47  | 0.57219835 | 0.60677337 | conserved  | conserved |
| CCDC50  | 0.32444259 | 0.53901929 | conserved  | conserved |
| CCDC51  | 0.04403535 | 0.09147328 | conserved  | conserved |
| CCDC57  | 0.63185226 | 0.04942121 | conserved  | conserved |
| CCDC6   | 1.89549142 | 0.28392898 | conserved  | conserved |
| CCDC60  | 0.06978964 | 0.01495917 | conserved  | conserved |
| CCDC61  | 0.03554854 | 0.14067415 | conserved  | conserved |
| CCDC62  | 0.1596418  | 0.0622018  | conserved  | conserved |
| CCDC65  | 0.07466995 | 0.01611378 | conserved  | conserved |
| CCDC66  | 1.06788774 | 0.12794009 | conserved  | conserved |
| CCDC68  | 0.00416716 | 0          | conserved  | conserved |
| CCDC69  | 0.02820225 | 0.00275294 | conserved  | conserved |
| CCDC71  | 0.01485638 | 0.15332287 | conserved  | conserved |
| CCDC73  | 0.09213791 | 0.03542378 | conserved  | conserved |

|          |            |            |           |           |
|----------|------------|------------|-----------|-----------|
| CCDC77   | 0.26390431 | 0.16522556 | conserved | conserved |
| CCDC78   | 0.01426707 | 0.05311944 | conserved | conserved |
| CCDC8    | 0.0011745  | 0.23236207 | conserved | conserved |
| CCDC80   | 0.38384283 | 2.32928884 | mouse-RGL | conserved |
| CCDC81   | 0.04851748 | 0.00607597 | conserved | conserved |
| CCDC82   | 0.64086032 | 0.04442375 | conserved | conserved |
| CCDC83   | 0.01205683 | 0          | conserved | conserved |
| CCDC85A  | 2.84027492 | 0.12594624 | conserved | conserved |
| CCDC86   | 0.01705304 | 0.36350742 | conserved | conserved |
| CCDC87   | 0.00235526 | 0.00540289 | conserved | conserved |
| CCDC88A  | 5.35518354 | 1.89556    | conserved | conserved |
| CCDC89   | 0.27076602 | 0.00300455 | conserved | conserved |
| CCDC9    | 0.14827561 | 0.13674176 | conserved | conserved |
| CCDC90B  | 0.32138398 | 0.67925174 | conserved | conserved |
| CCDC91   | 1.58185221 | 0.14582363 | conserved | conserved |
| CCDC92   | 0.52690893 | 0.10831787 | conserved | conserved |
| CCDC93   | 0.50824745 | 0.08748607 | conserved | conserved |
| CCDC97   | 0.08306746 | 0.16540531 | conserved | conserved |
| CCHCR1   | 0.08553991 | 0.04057009 | conserved | conserved |
| CCK      | 0.24532934 | 0.25959481 | conserved | conserved |
| CCL11    | 0          | 0          | conserved | conserved |
| CCL17    | 0          | 0.00956483 | conserved | conserved |
| CCL19    | 0.0031044  | 0.00706849 | conserved | conserved |
| CCL2     | 0.00414802 | 0          | conserved | conserved |
| CCL28    | 0.06970459 | 0.00387737 | conserved | conserved |
| CCM2     | 0.750145   | 0.49386823 | conserved | conserved |
| CCM2L    | 0.00602444 | 0.00446922 | conserved | conserved |
| CCNA1    | 0.00664071 | 0.01920528 | conserved | conserved |
| CCNA2    | 0.02960679 | 0.04729224 | conserved | conserved |
| CCNB1    | 0.04069799 | 0.01873233 | conserved | conserved |
| CCNB1IP1 | 0.0952276  | 0.00353409 | conserved | conserved |
| CCNB2    | 0.00642135 | 0.027222   | conserved | conserved |
| CCNB3    | 0.02592764 | 0          | conserved | conserved |
| CCNC     | 0.41611804 | 0.27379504 | conserved | conserved |
| CCND1    | 0.02278473 | 1.09410679 | mouse-RGL | conserved |
| CCND3    | 0.23992891 | 0.6135898  | conserved | conserved |
| CCNDBP1  | 0.18215124 | 0.46441488 | conserved | conserved |
| CCNE1    | 0.0291416  | 0.10361684 | conserved | conserved |
| CCNE2    | 0.05623517 | 0.07324694 | conserved | conserved |
| CCNF     | 0.13777651 | 0.00864444 | conserved | conserved |
| CCNG1    | 0.05953754 | 0.24454324 | conserved | conserved |



|        |            |            |           |           |
|--------|------------|------------|-----------|-----------|
| CCNG2  | 0.20852769 | 0.34779522 | conserved | conserved |
| CCNH   | 0.83909573 | 0.73759277 | conserved | conserved |
| CCNI   | 0.92005512 | 1.46978342 | conserved | conserved |
| CCNJ   | 0.07599486 | 0.0892176  | conserved | conserved |
| CCNJL  | 0.08928271 | 0.07898798 | conserved | conserved |
| CCNK   | 0.28671369 | 0.15953016 | conserved | conserved |
| CCNL1  | 0.47266355 | 1.03698738 | conserved | conserved |
| CCNO   | 0.00403776 | 0          | conserved | conserved |
| CCNT2  | 0.95675949 | 1.17742358 | conserved | conserved |
| CCNY   | 3.03803196 | 0.57892107 | conserved | conserved |
| CCP110 | 0.45532551 | 0.12255836 | conserved | conserved |
| CCPG1  | 1.55087688 | 0.14963961 | conserved | conserved |
| CCR10  | 0.00569267 | 0          | conserved | conserved |
| CCR2   | 0          | 0          | conserved | conserved |
| CCR3   | 0          | 0          | conserved | conserved |
| CCR4   | 0.00096838 | 0          | conserved | conserved |
| CCR5   | 0.00127162 | 0.01484098 | conserved | conserved |
| CCR6   | 0.00337716 | 0          | conserved | conserved |
| CCR7   | 0          | 0          | conserved | conserved |
| CCR9   | 0          | 0          | conserved | conserved |
| CCRL2  | 0          | 0          | conserved | conserved |
| CCS    | 0.21771844 | 0.92117583 | conserved | conserved |
| CCSAP  | 0.21030475 | 0.01572446 | conserved | conserved |
| CCSER1 | 7.31583176 | 0.0094617  | conserved | conserved |
| CCSER2 | 1.9575101  | 0.85674137 | conserved | conserved |
| CCT2   | 0.29568215 | 1.15149527 | mouse-RGL | conserved |
| CCT3   | 0.24796314 | 1.36967522 | mouse-RGL | conserved |
| CCT4   | 0.34613428 | 1.93294467 | mouse-RGL | conserved |
| CCT5   | 0.15679226 | 1.81692432 | mouse-RGL | conserved |
| CCT6B  | 0.27411036 | 0.01845272 | conserved | conserved |
| CCT7   | 0.30878765 | 1.45319074 | mouse-RGL | conserved |
| CCT8   | 0.2549714  | 1.17770462 | conserved | conserved |
| CD101  | 0.16636839 | 0          | conserved | conserved |
| CD109  | 0.37876207 | 0.0741267  | conserved | conserved |
| CD14   | 0.01737265 | 0.00613494 | conserved | conserved |
| CD151  | 0.12516846 | 0.46252681 | conserved | conserved |
| CD160  | 0.06045229 | 0          | conserved | conserved |
| CD163  | 0.01988746 | 0          | conserved | conserved |
| CD164  | 0.26639188 | 1.33945613 | conserved | conserved |
| CD180  | 0.00740562 | 0          | conserved | conserved |
| CD19   | 0          | 0          | conserved | conserved |

|         |            |            |            |           |
|---------|------------|------------|------------|-----------|
| CD2     | 0.00142242 | 0.00093514 | conserved  | conserved |
| CD200   | 0.3037987  | 0.34503416 | conserved  | conserved |
| CD207   | 0          | 0          | conserved  | conserved |
| CD22    | 0.02449536 | 0          | conserved  | conserved |
| CD244   | 0.02687544 | 0          | conserved  | conserved |
| CD247   | 0.02809732 | 0          | conserved  | conserved |
| CD274   | 0.03173775 | 0.00207817 | conserved  | conserved |
| CD276   | 0.11416844 | 0.14241576 | conserved  | conserved |
| CD28    | 0.01052135 | 0          | conserved  | conserved |
| CD2AP   | 0.25013342 | 0.23155864 | conserved  | conserved |
| CD2BP2  | 0.10229943 | 0.28904716 | conserved  | conserved |
| CD300E  | 0.00210326 | 0          | conserved  | conserved |
| CD300LB | 0.00183711 | 0          | conserved  | conserved |
| CD300LG | 0.02819658 | 0.00551238 | conserved  | conserved |
| CD320   | 0.07882526 | 0.3329074  | conserved  | conserved |
| CD34    | 0.00409264 | 0.0034067  | conserved  | conserved |
| CD36    | 0.04145289 | 0.0053467  | conserved  | conserved |
| CD38    | 0.83606438 | 0.03755637 | monkey-NSC | conserved |
| CD3D    | 0          | 0          | conserved  | conserved |
| CD3E    | 0.00422497 | 0          | conserved  | conserved |
| CD3G    | 0.00048179 | 0          | conserved  | conserved |
| CD4     | 0.05409377 | 0          | conserved  | conserved |
| CD40    | 0.10898953 | 0          | conserved  | conserved |
| CD40LG  | 0.00075365 | 0          | conserved  | conserved |
| CD44    | 0.37062243 | 0.10405754 | conserved  | conserved |
| CD46    | 1.24729978 | 0.0590145  | conserved  | conserved |
| CD47    | 1.15037426 | 0.84379389 | conserved  | conserved |
| CD48    | 0.01115301 | 0          | conserved  | conserved |
| CD52    | 0.00079269 | 0          | conserved  | conserved |
| CD53    | 0.01776648 | 0.00482669 | conserved  | conserved |
| CD5L    | 0          | 0          | conserved  | conserved |
| CD6     | 0.00217    | 0          | conserved  | conserved |
| CD69    | 0          | 0          | conserved  | conserved |
| CD72    | 0.02877458 | 0.00357637 | conserved  | conserved |
| CD74    | 0.00688978 | 0          | conserved  | conserved |
| CD79A   | 0.00057861 | 0.00423259 | conserved  | conserved |
| CD79B   | 0          | 0          | conserved  | conserved |
| CD80    | 0.08041162 | 0.01291326 | conserved  | conserved |
| CD81    | 1.98946621 | 11.5606557 | conserved  | conserved |
| CD82    | 0.18448436 | 0.33565839 | conserved  | conserved |
| CD83    | 0.10015624 | 0.02330855 | conserved  | conserved |

|          |            |            |            |           |
|----------|------------|------------|------------|-----------|
| CD84     | 0.00305903 | 0          | conserved  | conserved |
| CD86     | 0.01119114 | 0          | conserved  | conserved |
| CD8A     | 0.00368173 | 0          | conserved  | conserved |
| CD9      | 0.14790135 | 4.432792   | mouse-RGL  | conserved |
| CD93     | 0.00152806 | 0.00343309 | conserved  | conserved |
| CD96     | 0.04104601 | 0          | conserved  | conserved |
| CDA      | 0.00725552 | 0          | conserved  | conserved |
| CDADC1   | 0.13269372 | 0.1157522  | conserved  | conserved |
| CDAN1    | 0.48923734 | 0.07929137 | conserved  | conserved |
| CDC123   | 0.43808684 | 0.69917177 | conserved  | conserved |
| CDC14A   | 1.38029277 | 0.19065092 | conserved  | conserved |
| CDC16    | 0.61698896 | 0.52146114 | conserved  | conserved |
| CDC20    | 0.0092966  | 0.01563491 | conserved  | conserved |
| CDC20B   | 0.00157214 | 0          | conserved  | conserved |
| CDC23    | 0.39658914 | 0.31250133 | conserved  | conserved |
| CDC25A   | 0.09377181 | 0.1251107  | conserved  | conserved |
| CDC25B   | 0.1258169  | 0.0985643  | conserved  | conserved |
| CDC25C   | 0.04837063 | 0.02417954 | conserved  | conserved |
| CDC26    | 0.06862762 | 1.94382022 | conserved  | conserved |
| CDC37L1  | 0.23820336 | 0.33809278 | conserved  | conserved |
| CDC40    | 1.14717983 | 0.24616052 | conserved  | conserved |
| CDC42BPA | 11.6497067 | 0.40148473 | conserved  | conserved |
| CDC42BPB | 1.45894695 | 0.24998377 | conserved  | conserved |
| CDC42BPG | 0.00452517 | 0.04013809 | conserved  | conserved |
| CDC42EP3 | 0.10334832 | 0.01631099 | conserved  | conserved |
| CDC42SE2 | 1.14846851 | 1.01498669 | conserved  | conserved |
| CDC45    | 0.03304036 | 0.05044977 | conserved  | conserved |
| CDC6     | 0.01969902 | 0.0713977  | conserved  | conserved |
| CDC73    | 1.46606959 | 0.4238747  | monkey-NSC | conserved |
| CDCA2    | 0.00881786 | 0.01488799 | conserved  | conserved |
| CDCA3    | 0.00286308 | 0.08913798 | conserved  | conserved |
| CDCA5    | 0.00126746 | 0.02118442 | conserved  | conserved |
| CDCA7    | 0.0068352  | 0.33996969 | conserved  | conserved |
| CDCA7L   | 0.07340348 | 0.08713389 | conserved  | conserved |
| CDCA8    | 0.01775362 | 0.06347519 | conserved  | conserved |
| CDCP1    | 0.04428367 | 0          | conserved  | conserved |
| CDCP2    | 0.00148338 | 0          | conserved  | conserved |
| CDH1     | 0.24330818 | 0          | conserved  | conserved |
| CDH10    | 3.36541843 | 0.22046171 | conserved  | conserved |
| CDH11    | 2.71325631 | 0.18665829 | monkey-NSC | conserved |
| CDH12    | 1.99711918 | 0.00419637 | monkey-NSC | conserved |

|          |            |            |            |           |
|----------|------------|------------|------------|-----------|
| CDH13    | 0.92790377 | 0.19191187 | conserved  | conserved |
| CDH15    | 0.00677388 | 0          | conserved  | conserved |
| CDH16    | 0          | 0          | conserved  | conserved |
| CDH17    | 0.04375186 | 0.01046093 | conserved  | conserved |
| CDH18    | 0.7890057  | 0.01991658 | conserved  | conserved |
| CDH19    | 0.12482932 | 0.02044974 | conserved  | conserved |
| CDH2     | 4.16815445 | 2.2363132  | conserved  | conserved |
| CDH20    | 23.2187942 | 0.04475632 | monkey-NSC | conserved |
| CDH22    | 0.03335746 | 0.01591792 | conserved  | conserved |
| CDH24    | 0.1930172  | 0.02151878 | conserved  | conserved |
| CDH26    | 0.9339332  | 0          | monkey-NSC | conserved |
| CDH3     | 0.03472831 | 0          | conserved  | conserved |
| CDH4     | 13.5557761 | 1.4524061  | conserved  | conserved |
| CDH5     | 0.00615736 | 0.01172829 | conserved  | conserved |
| CDH6     | 0.17773689 | 0.00240927 | conserved  | conserved |
| CDH7     | 0.06376873 | 0          | conserved  | conserved |
| CDH8     | 3.09596669 | 0.02352686 | monkey-NSC | conserved |
| CDH9     | 1.98979955 | 0.00306108 | conserved  | conserved |
| CDHR1    | 0.01349244 | 0.00093514 | conserved  | conserved |
| CDHR2    | 0.01453773 | 0          | conserved  | conserved |
| CDHR5    | 0.00306393 | 0          | conserved  | conserved |
| CDIP1    | 0.57561441 | 0.76576526 | conserved  | conserved |
| CDIPT    | 0.17756853 | 0.46716968 | conserved  | conserved |
| CDK10    | 0.35121384 | 0.18203063 | conserved  | conserved |
| CDK12    | 1.23988247 | 0.53607136 | conserved  | conserved |
| CDK14    | 2.96633547 | 0.17430872 | conserved  | conserved |
| CDK15    | 0.09838304 | 0.00817321 | conserved  | conserved |
| CDK17    | 1.02487899 | 0.61948403 | conserved  | conserved |
| CDK18    | 0.02658973 | 0          | conserved  | conserved |
| CDK19    | 1.60940872 | 0.20621878 | conserved  | conserved |
| CDK20    | 0.03032009 | 0.20781792 | conserved  | conserved |
| CDK4     | 0.14821167 | 3.86471394 | mouse-RGL  | conserved |
| CDK5     | 0.07885665 | 0.36179114 | conserved  | conserved |
| CDK5RAP1 | 0.95903747 | 0.04732282 | conserved  | conserved |
| CDK5RAP2 | 2.59638462 | 0.17772047 | monkey-NSC | conserved |
| CDK5RAP3 | 0.66151926 | 0.44165223 | conserved  | conserved |
| CDK6     | 0.65397623 | 1.11727143 | mouse-RGL  | conserved |
| CDK7     | 0.32976167 | 0.26189118 | conserved  | conserved |
| CDK8     | 1.49093505 | 0.14181816 | monkey-NSC | conserved |
| CDKAL1   | 3.47435572 | 0.23620185 | conserved  | conserved |
| CDKL1    | 0.23061186 | 0.00843964 | conserved  | conserved |

|          |            |            |            |           |
|----------|------------|------------|------------|-----------|
| CDKL2    | 0.26333237 | 0.03965764 | conserved  | conserved |
| CDKL5    | 0.98358919 | 0.08403227 | conserved  | conserved |
| CDKN1A   | 0.00436349 | 0.05881583 | conserved  | conserved |
| CDKN1B   | 0.17054732 | 0.57654823 | conserved  | conserved |
| CDKN2AIP | 0.0250402  | 0.2440953  | conserved  | conserved |
| CDKN2C   | 0.00809493 | 0.40031302 | conserved  | conserved |
| CDKN2D   | 0.06290855 | 0.31700605 | conserved  | conserved |
| CDKN3    | 0.03339178 | 0.01524793 | conserved  | conserved |
| CDON     | 0.71949854 | 0.37130752 | conserved  | conserved |
| CDPF1    | 0.01722015 | 0.2578758  | conserved  | conserved |
| CDR1     | 0.00857486 | 0.02133013 | conserved  | conserved |
| CDR2     | 0.01728715 | 0.01190559 | conserved  | conserved |
| CDR2L    | 0.03919773 | 0.12345464 | conserved  | conserved |
| CDS1     | 0.67544943 | 0.00367347 | conserved  | conserved |
| CDS2     | 0.68737261 | 0.31001026 | conserved  | conserved |
| CDSN     | 0          | 0          | conserved  | conserved |
| CDT1     | 0          | 0.06864068 | conserved  | conserved |
| CDV3     | 0.11395066 | 1.07185305 | conserved  | conserved |
| CDX1     | 0.00614213 | 0          | conserved  | conserved |
| CDYL     | 0.54263357 | 0.08277413 | conserved  | conserved |
| CDYL2    | 0.04539629 | 0.08746624 | conserved  | conserved |
| CEACAM18 | 0          | 0          | conserved  | conserved |
| CEACAM19 | 0.00460705 | 0          | conserved  | conserved |
| CEBPE    | 0          | 0          | conserved  | conserved |
| CEBPG    | 0.03662856 | 0.54586649 | conserved  | conserved |
| CEBPZ    | 0.23027161 | 0.55275539 | conserved  | conserved |
| CECR2    | 2.77232517 | 0.28681077 | monkey-NSC | conserved |
| CEL      | 0.06681813 | 0          | conserved  | conserved |
| CELA1    | 0.00118843 | 0.00607442 | conserved  | conserved |
| CELF1    | 1.67019083 | 1.0739735  | conserved  | conserved |
| CELF2    | 9.43952955 | 3.87647219 | conserved  | conserved |
| CELF3    | 0.09076308 | 0.13861269 | conserved  | conserved |
| CELF4    | 0.53265454 | 0.43919913 | conserved  | conserved |
| CELSR1   | 0.10509129 | 0.51424913 | conserved  | conserved |
| CELSR3   | 0.01815356 | 0.02933865 | conserved  | conserved |
| CEMIP    | 0.15335184 | 0.01097978 | conserved  | conserved |
| CENPA    | 0.02091086 | 0.15728762 | conserved  | conserved |
| CENPE    | 0.03909151 | 0.02721939 | conserved  | conserved |
| CENPF    | 0.01225722 | 0.22046041 | conserved  | conserved |
| CENPH    | 0.01137322 | 0.0768751  | conserved  | conserved |
| CENPI    | 0.11381207 | 0.00892957 | conserved  | conserved |

|         |            |            |            |           |
|---------|------------|------------|------------|-----------|
| CENPJ   | 0.12062642 | 0.03820212 | conserved  | conserved |
| CENPK   | 0.06129009 | 0.08835593 | conserved  | conserved |
| CENPL   | 0.03682922 | 0.06232544 | conserved  | conserved |
| CENPM   | 0.10312014 | 0.31788873 | conserved  | conserved |
| CENPN   | 0.04183893 | 0.03392675 | conserved  | conserved |
| CENPO   | 0.02447388 | 0.01713609 | conserved  | conserved |
| CENPP   | 0.33724639 | 0.03594407 | conserved  | conserved |
| CENPQ   | 0.01272121 | 0.26931698 | conserved  | conserved |
| CENPT   | 0.00933681 | 0.26526111 | conserved  | conserved |
| CENPU   | 0.03501899 | 0.03359062 | conserved  | conserved |
| CENPV   | 0.12470325 | 0.30854739 | conserved  | conserved |
| CENPW   | 0.02263908 | 0.25610418 | conserved  | conserved |
| CEP104  | 1.24956291 | 0.20045418 | conserved  | conserved |
| CEP112  | 4.90089019 | 0.11402794 | monkey-NSC | conserved |
| CEP120  | 0.37428724 | 0.09722473 | conserved  | conserved |
| CEP126  | 0.66074886 | 0.05723955 | conserved  | conserved |
| CEP128  | 0.37352163 | 0.02571778 | conserved  | conserved |
| CEP131  | 0.05535145 | 0.12013055 | conserved  | conserved |
| CEP135  | 0.26989041 | 0.01143181 | conserved  | conserved |
| CEP152  | 0.08431674 | 0.03777004 | conserved  | conserved |
| CEP162  | 1.60940172 | 0.1478864  | conserved  | conserved |
| CEP170  | 3.24640991 | 0.35887646 | conserved  | conserved |
| CEP19   | 0.12164478 | 0.50008932 | conserved  | conserved |
| CEP290  | 0.74377896 | 0.26128942 | conserved  | conserved |
| CEP295  | 0.93347951 | 0.2005414  | conserved  | conserved |
| CEP350  | 2.00361398 | 0.09056847 | conserved  | conserved |
| CEP41   | 0.15312867 | 0.13965116 | conserved  | conserved |
| CEP44   | 0.28429863 | 0.196805   | conserved  | conserved |
| CEP55   | 0.00318231 | 0.00735208 | conserved  | conserved |
| CEP57   | 0.558234   | 0.35470457 | conserved  | conserved |
| CEP57L1 | 0.62349829 | 0.14330728 | conserved  | conserved |
| CEP63   | 0.38071542 | 0.22639452 | conserved  | conserved |
| CEP68   | 0.36164112 | 0.09602956 | conserved  | conserved |
| CEP70   | 0.94550586 | 0.13379263 | conserved  | conserved |
| CEP72   | 0.02217992 | 0.01217853 | conserved  | conserved |
| CEP78   | 0.32772805 | 0.11681779 | conserved  | conserved |
| CEP83   | 0.85637836 | 0.29594673 | conserved  | conserved |
| CEP85   | 0.1935156  | 0.05686654 | conserved  | conserved |
| CEP85L  | 2.74693735 | 0.04585722 | conserved  | conserved |
| CEP89   | 0.65322561 | 0.09979686 | conserved  | conserved |
| CEP95   | 0.50033195 | 0.10999836 | conserved  | conserved |

|         |            |            |           |           |
|---------|------------|------------|-----------|-----------|
| CEP97   | 0.24627664 | 0.16247805 | conserved | conserved |
| CEPT1   | 0.56543553 | 0.1978071  | conserved | conserved |
| CER1    | 0.00846122 | 0.01263718 | conserved | conserved |
| CERK    | 0.56757792 | 0.09466556 | conserved | conserved |
| CERKL   | 0.1052811  | 0.0121139  | conserved | conserved |
| CERS2   | 0.10620356 | 0.64122638 | conserved | conserved |
| CERS3   | 0.00973309 | 0.00409477 | conserved | conserved |
| CERS4   | 0.38083198 | 0.62182454 | conserved | conserved |
| CERS5   | 0.37572281 | 0.33515028 | conserved | conserved |
| CERS6   | 0.49489484 | 0.08635251 | conserved | conserved |
| CETN2   | 0.0595245  | 1.11728459 | conserved | conserved |
| CETN3   | 0.1683824  | 2.46946165 | mouse-RGL | conserved |
| CFAP100 | 0.21452149 | 0.08531656 | conserved | conserved |
| CFAP126 | 0.01287432 | 0.07437156 | conserved | conserved |
| CFAP157 | 0.01349105 | 0.0070008  | conserved | conserved |
| CFAP161 | 0          | 0.00714686 | conserved | conserved |
| CFAP20  | 0.23726356 | 1.32466679 | mouse-RGL | conserved |
| CFAP221 | 0.74319212 | 0          | conserved | conserved |
| CFAP36  | 0.38432157 | 0.98342559 | conserved | conserved |
| CFAP44  | 0.22726185 | 0.04746479 | conserved | conserved |
| CFAP45  | 0.00101158 | 0.01150836 | conserved | conserved |
| CFAP52  | 0.05434378 | 0.00570439 | conserved | conserved |
| CFAP54  | 0.29757933 | 0.08628707 | conserved | conserved |
| CFAP57  | 0.04001606 | 0.00323602 | conserved | conserved |
| CFAP58  | 0.01538885 | 0          | conserved | conserved |
| CFAP69  | 0.57597067 | 0.05349505 | conserved | conserved |
| CFAP70  | 0.92968529 | 0          | conserved | conserved |
| CFAP73  | 0.01648423 | 0          | conserved | conserved |
| CFAP77  | 0.19487723 | 0.0042309  | conserved | conserved |
| CFAP97  | 0.28989664 | 0.2328365  | conserved | conserved |
| CFAP99  | 0.08706348 | 0.00505644 | conserved | conserved |
| CFDP1   | 1.67782617 | 1.2362804  | conserved | conserved |
| CFL2    | 0.13264731 | 2.43089507 | mouse-RGL | conserved |
| CFLAR   | 0.44291899 | 0.40182016 | conserved | conserved |
| CFP     | 0.01820059 | 0.05422372 | conserved | conserved |
| CFTR    | 0.01573388 | 0          | conserved | conserved |
| CGA     | 0          | 0          | conserved | conserved |
| CGNL1   | 0.02434703 | 0.00727024 | conserved | conserved |
| CHAC1   | 0          | 0.00252771 | conserved | conserved |
| CHAC2   | 0.09791667 | 0.1511275  | conserved | conserved |
| CHAD    | 0.00281512 | 0          | conserved | conserved |

|         |            |            |           |           |
|---------|------------|------------|-----------|-----------|
| CHAF1A  | 0.08806976 | 0.0925411  | conserved | conserved |
| CHAMP1  | 0.15160376 | 0.14920796 | conserved | conserved |
| CHAT    | 0          | 0          | conserved | conserved |
| CHCHD5  | 0.01167302 | 0.67746074 | conserved | conserved |
| CHCHD6  | 0.7343709  | 0.80383216 | conserved | conserved |
| CHD1    | 0.83190899 | 0.51872507 | conserved | conserved |
| CHD1L   | 0.5625177  | 0.0985894  | conserved | conserved |
| CHD3    | 0.15210771 | 1.00184522 | conserved | conserved |
| CHD5    | 0.35615142 | 0.08647114 | conserved | conserved |
| CHD6    | 3.47469379 | 0.65986041 | conserved | conserved |
| CHD7    | 1.48492916 | 1.44073545 | conserved | conserved |
| CHD8    | 0.9714513  | 0.55213138 | conserved | conserved |
| CHD9    | 6.29848969 | 0.50262508 | conserved | conserved |
| CHERP   | 0.17182578 | 0.15363325 | conserved | conserved |
| CHFR    | 0.60959371 | 0.20231761 | conserved | conserved |
| CHGA    | 0.16584666 | 0.04098959 | conserved | conserved |
| CHGB    | 0.434969   | 0.09170968 | conserved | conserved |
| CHIC1   | 1.41287136 | 0.30853207 | conserved | conserved |
| CHID1   | 0.25117871 | 0.31241797 | conserved | conserved |
| CHIT1   | 0          | 0          | conserved | conserved |
| CHKA    | 3.69978952 | 0.4973278  | conserved | conserved |
| CHL1    | 5.92508158 | 0.46744909 | conserved | conserved |
| CHM     | 1.13655295 | 0.29915707 | conserved | conserved |
| CHMP2A  | 0.0953565  | 2.376946   | mouse-RGL | conserved |
| CHMP2B  | 0.1119078  | 0.67035717 | conserved | conserved |
| CHMP4C  | 0.00705905 | 0          | conserved | conserved |
| CHMP5   | 0.42918874 | 1.26331796 | mouse-RGL | conserved |
| CHMP7   | 0.08273145 | 0.41829353 | conserved | conserved |
| CHN1    | 6.14208769 | 0.4492536  | conserved | conserved |
| CHORDC1 | 0.33018196 | 0.24837297 | conserved | conserved |
| CHP1    | 0.77524026 | 0.30160166 | conserved | conserved |
| CHPF    | 0.14201641 | 0.19620001 | conserved | conserved |
| CHPF2   | 0.09661548 | 0.14841805 | conserved | conserved |
| CHPT1   | 3.6411422  | 0.73252464 | conserved | conserved |
| CHRAC1  | 0.06278975 | 0.77960452 | conserved | conserved |
| CHRD    | 0.08047954 | 0.01616821 | conserved | conserved |
| CHRD1   | 0.35105938 | 0.04870294 | conserved | conserved |
| CHRD2   | 0.01267487 | 0          | conserved | conserved |
| CHRM2   | 0.04831707 | 0          | conserved | conserved |
| CHRM4   | 0.00074893 | 0          | conserved | conserved |
| CHRM5   | 0          | 0          | conserved | conserved |



|        |            |            |            |                      |
|--------|------------|------------|------------|----------------------|
| CHRNA1 | 0.01168983 | 0          | conserved  | conserved            |
| CHRNA2 | 0.03005631 | 0          | conserved  | conserved            |
| CHRNA3 | 0.02141998 | 0.00203474 | conserved  | conserved            |
| CHRNA5 | 0.01228628 | 0          | conserved  | conserved            |
| CHRNA6 | 0          | 0          | conserved  | conserved            |
| CHRNA1 | 0.0649467  | 0.00414361 | conserved  | conserved            |
| CHRNA2 | 0.04205045 | 0.02959825 | conserved  | conserved            |
| CHRNA4 | 0.00114044 | 0.00797474 | conserved  | conserved            |
| CHRND  | 0.11749186 | 0          | conserved  | conserved            |
| CHRNE  | 0.00964256 | 0.00561353 | conserved  | conserved            |
| CHRNA6 | 0.03617609 | 0          | conserved  | conserved            |
| CHST10 | 0.48279824 | 0.20558509 | conserved  | conserved            |
| CHST11 | 3.75574436 | 0.12468972 | monkey-NSC | conserved            |
| CHST15 | 0.01897483 | 0.02118813 | conserved  | conserved            |
| CHST2  | 0.04500717 | 0.9607399  | conserved  | conserved            |
| CHST4  | 0          | 0.00344412 | conserved  | conserved            |
| CHST7  | 0.12256532 | 0.01507307 | conserved  | conserved            |
| CHST8  | 0.04116993 | 0.00678964 | conserved  | conserved            |
| CHST9  | 1.23230251 | 0          | monkey-NSC | monkey-NSC1-enriched |
| CHSY1  | 0.9444572  | 0.40297491 | conserved  | conserved            |
| CHTF18 | 0.00661524 | 0.01319654 | conserved  | conserved            |
| CHTOP  | 0.37588616 | 1.67289671 | conserved  | conserved            |
| CHUK   | 0.46944432 | 0.58124351 | conserved  | conserved            |
| CIAO1  | 0.10578902 | 0.1530981  | conserved  | conserved            |
| CIART  | 0.09015027 | 0.05736171 | conserved  | conserved            |
| CIB1   | 0.00769816 | 0.93696616 | mouse-RGL  | conserved            |
| CIB2   | 0.08475439 | 0.34996349 | conserved  | conserved            |
| CIB3   | 0.00504231 | 0          | conserved  | conserved            |
| CIB4   | 0.01140846 | 0          | conserved  | conserved            |
| CIC    | 0.32347137 | 0.35367916 | conserved  | conserved            |
| CIDEB  | 0.00219633 | 0.03919055 | conserved  | conserved            |
| CIDEC  | 0.00986321 | 0          | conserved  | conserved            |
| CIITA  | 0.01230748 | 0.00493709 | conserved  | conserved            |
| CILP   | 0.01561646 | 0          | conserved  | conserved            |
| CILP2  | 0.00196742 | 0.04333901 | conserved  | conserved            |
| CINP   | 0.26727643 | 0.36475065 | conserved  | conserved            |
| CISH   | 0          | 0.03092848 | conserved  | conserved            |
| CKAP2  | 0.03646681 | 0.02143691 | conserved  | conserved            |
| CKAP2L | 0.01157233 | 0.0191227  | conserved  | conserved            |
| CKAP4  | 0.0762191  | 0.43997582 | conserved  | conserved            |
| CKAP5  | 0.8070447  | 0.84325994 | conserved  | conserved            |

|         |            |            |            |           |
|---------|------------|------------|------------|-----------|
| CKMT2   | 0.08797122 | 0          | conserved  | conserved |
| CLASP1  | 4.13660191 | 0.43908132 | conserved  | conserved |
| CLASRP  | 0.37162984 | 0.32957831 | conserved  | conserved |
| CLCC1   | 0.47545492 | 0.25871191 | conserved  | conserved |
| CLCN1   | 0.01076586 | 0.01006593 | conserved  | conserved |
| CLCN2   | 0.41093463 | 0.14642307 | conserved  | conserved |
| CLCN3   | 1.07331603 | 1.44045645 | conserved  | conserved |
| CLCN4   | 0.28193459 | 0.67159555 | conserved  | conserved |
| CLCN5   | 0.13742556 | 0.17619818 | conserved  | conserved |
| CLCN6   | 0.73726446 | 0.28630721 | conserved  | conserved |
| CLCN7   | 0.10823203 | 0.1064471  | conserved  | conserved |
| CLDN1   | 0.02220303 | 0.00274003 | conserved  | conserved |
| CLDN10  | 1.49777319 | 0.94929458 | monkey-NSC | conserved |
| CLDN11  | 0.39095784 | 0.05520364 | conserved  | conserved |
| CLDN14  | 0.00222792 | 0          | conserved  | conserved |
| CLDN16  | 0.01805561 | 0          | conserved  | conserved |
| CLDN18  | 0          | 0          | conserved  | conserved |
| CLDN2   | 0.02684423 | 0.05241376 | conserved  | conserved |
| CLDN7   | 0          | 0.00388205 | conserved  | conserved |
| CLDN8   | 0          | 0          | conserved  | conserved |
| CLDND1  | 0.18670927 | 1.41723597 | conserved  | conserved |
| CLEC11A | 0.03523612 | 0.09967903 | conserved  | conserved |
| CLEC12A | 0.01162866 | 0          | conserved  | conserved |
| CLEC12B | 0          | 0          | conserved  | conserved |
| CLEC16A | 2.57851866 | 0.12796566 | monkey-NSC | conserved |
| CLEC1A  | 0.00240046 | 0.00172599 | conserved  | conserved |
| CLEC1B  | 0          | 0          | conserved  | conserved |
| CLEC2L  | 0.07778487 | 0.02875515 | conserved  | conserved |
| CLEC3B  | 0.02110361 | 0.1709864  | conserved  | conserved |
| CLEC4D  | 0          | 0          | conserved  | conserved |
| CLEC4E  | 0          | 0          | conserved  | conserved |
| CLEC4F  | 0          | 0          | conserved  | conserved |
| CLEC4G  | 0          | 0          | conserved  | conserved |
| CLEC5A  | 0.00498105 | 0          | conserved  | conserved |
| CLEC9A  | 0.00339925 | 0          | conserved  | conserved |
| CLGN    | 0.10333541 | 0          | conserved  | conserved |
| CLHC1   | 0.28939792 | 0.00426884 | conserved  | conserved |
| CLIC3   | 0.00405854 | 0          | conserved  | conserved |
| CLIC4   | 0.60016347 | 0.58744835 | conserved  | conserved |
| CLIC5   | 0.04671591 | 0          | conserved  | conserved |
| CLINT1  | 0.69479316 | 0.21648652 | conserved  | conserved |

|         |            |            |            |           |
|---------|------------|------------|------------|-----------|
| CLIP1   | 2.65732518 | 0.31129347 | conserved  | conserved |
| CLIP2   | 0.31654349 | 0.36378706 | conserved  | conserved |
| CLIP4   | 1.31659602 | 0.42187481 | conserved  | conserved |
| CLK1    | 1.0551579  | 1.2052503  | conserved  | conserved |
| CLK3    | 0.2281754  | 0.23242127 | conserved  | conserved |
| CLK4    | 0.66141963 | 0.74407059 | conserved  | conserved |
| CLMN    | 0.46031589 | 0.32097641 | conserved  | conserved |
| CLMP    | 0.39184854 | 0.00629699 | conserved  | conserved |
| CLN6    | 0.1216595  | 0.08460108 | conserved  | conserved |
| CLNK    | 0.05133673 | 0          | conserved  | conserved |
| CLNS1A  | 0.23354572 | 0.66679076 | conserved  | conserved |
| CLOCK   | 0.33764207 | 0.68719815 | conserved  | conserved |
| CLP1    | 0.02131929 | 0.07791185 | conserved  | conserved |
| CLPB    | 0.24242601 | 0.2284498  | conserved  | conserved |
| CLPTM1  | 0.90134405 | 0.48805078 | conserved  | conserved |
| CLPTM1L | 0.17483507 | 0.65599092 | conserved  | conserved |
| CLRN1   | 0.00325479 | 0.02139319 | conserved  | conserved |
| CLRN2   | 0.00375585 | 0          | conserved  | conserved |
| CLRN3   | 0.001151   | 0          | conserved  | conserved |
| CLSPN   | 0.03331992 | 0.08363316 | conserved  | conserved |
| CLSTN2  | 3.68185266 | 0.20496996 | conserved  | conserved |
| CLSTN3  | 0.2087881  | 0.04736193 | conserved  | conserved |
| CLTB    | 0.35216876 | 1.06283699 | conserved  | conserved |
| CLTC    | 1.71755393 | 1.08409548 | conserved  | conserved |
| CLU     | 6.22749205 | 4.71491664 | monkey-NSC | conserved |
| CLUH    | 0.069541   | 0.17449148 | conserved  | conserved |
| CLVS1   | 0.46188709 | 0.01941652 | conserved  | conserved |
| CLVS2   | 0.87531081 | 0.01986131 | conserved  | conserved |
| CLYBL   | 2.31546455 | 0.42772422 | conserved  | conserved |
| CMAS    | 0.35689349 | 0.38241211 | conserved  | conserved |
| CMBL    | 0.09527605 | 0.01086174 | conserved  | conserved |
| CMIP    | 1.72988275 | 0.52100797 | conserved  | conserved |
| CMKLR1  | 0.01873884 | 0          | conserved  | conserved |
| CMSS1   | 1.14932611 | 0.06417262 | conserved  | conserved |
| CMTM3   | 0.13118094 | 0.39416332 | conserved  | conserved |
| CMTM5   | 0.07226912 | 1.66731671 | conserved  | conserved |
| CMTM6   | 0.28406258 | 0.27722852 | conserved  | conserved |
| CMTM7   | 0.01777667 | 0.05353657 | conserved  | conserved |
| CMTM8   | 0.08542368 | 0.03541216 | conserved  | conserved |
| CMTR1   | 0.29035114 | 0.04006058 | conserved  | conserved |
| CMYA5   | 0.06001977 | 0.02923955 | conserved  | conserved |

|        |            |            |            |           |
|--------|------------|------------|------------|-----------|
| CNBD1  | 0.06313108 | 0          | conserved  | conserved |
| CNBD2  | 0.06102256 | 0.06286963 | conserved  | conserved |
| CNBP   | 0.30661374 | 5.5264171  | mouse-RGL  | conserved |
| CNDP1  | 0.08358226 | 0          | conserved  | conserved |
| CNGA1  | 0          | 0          | conserved  | conserved |
| CNGA3  | 0.05609862 | 0          | conserved  | conserved |
| CNGB3  | 0.0405838  | 0          | conserved  | conserved |
| CNIH1  | 0.19235996 | 1.17766379 | conserved  | conserved |
| CNIH2  | 0.24360066 | 0.91453741 | conserved  | conserved |
| CNIH3  | 0.39871544 | 0.43506488 | conserved  | conserved |
| CNIH4  | 0.23068687 | 0.76006455 | conserved  | conserved |
| CNKSR2 | 3.2788838  | 0.02798749 | conserved  | conserved |
| CNN1   | 0.02168196 | 0.00511479 | conserved  | conserved |
| CNN3   | 1.73656334 | 7.22076632 | mouse-RGL  | conserved |
| CNNM4  | 0.4424832  | 0.05436244 | conserved  | conserved |
| CNOT1  | 1.30329507 | 0.25660384 | conserved  | conserved |
| CNOT10 | 1.33283744 | 0.16353394 | conserved  | conserved |
| CNOT11 | 0.21915146 | 0.2604154  | conserved  | conserved |
| CNOT2  | 1.53629364 | 0.33652617 | conserved  | conserved |
| CNOT3  | 0.26422872 | 0.37152505 | conserved  | conserved |
| CNOT4  | 1.59383606 | 0.641202   | conserved  | conserved |
| CNOT6  | 0.53612082 | 0.7399115  | conserved  | conserved |
| CNOT6L | 0.33614919 | 0.39439756 | conserved  | conserved |
| CNOT8  | 0.13193662 | 0.37192828 | conserved  | conserved |
| CNP    | 0.12157392 | 0.66069746 | conserved  | conserved |
| CNPPD1 | 0.16009593 | 0.29835048 | conserved  | conserved |
| CNPY3  | 0.16928631 | 0.57969467 | conserved  | conserved |
| CNPY4  | 0.08859185 | 0.13072545 | conserved  | conserved |
| CNR1   | 0.23284685 | 0.19391384 | conserved  | conserved |
| CNR2   | 0.00616165 | 0          | conserved  | conserved |
| CNRIP1 | 0.40761892 | 0.81221028 | conserved  | conserved |
| CNST   | 0.75253383 | 0.07469821 | conserved  | conserved |
| CNTD1  | 0.1454572  | 0.01059498 | conserved  | conserved |
| CNTFR  | 2.41552579 | 0.44089349 | monkey-NSC | conserved |
| CNTLN  | 1.476151   | 0.2830604  | conserved  | conserved |
| CNTN1  | 9.0555348  | 0.19582865 | conserved  | conserved |
| CNTN2  | 0.1341785  | 0.07582084 | conserved  | conserved |
| CNTN3  | 0.65732573 | 0          | conserved  | conserved |
| CNTN4  | 0.69663252 | 0.01726857 | conserved  | conserved |
| CNTN5  | 3.03499976 | 0.00649209 | monkey-NSC | conserved |
| CNTN6  | 0.32904346 | 0.02334725 | conserved  | conserved |

|         |            |            |            |                      |
|---------|------------|------------|------------|----------------------|
| CNTNAP1 | 0.10977925 | 0.0191624  | conserved  | conserved            |
| CNTNAP2 | 8.72447607 | 1.11094536 | conserved  | conserved            |
| CNTRL   | 0.47465636 | 0.16486126 | conserved  | conserved            |
| CNTROB  | 0.17251923 | 0.05158435 | conserved  | conserved            |
| COA5    | 0.15075077 | 0.48490794 | conserved  | conserved            |
| COA6    | 0.137286   | 0.40434833 | conserved  | conserved            |
| COA7    | 0.01531918 | 0.18082112 | conserved  | conserved            |
| COASY   | 0.01617685 | 0.2765703  | conserved  | conserved            |
| COBL    | 0.62498771 | 0          | conserved  | conserved            |
| COBLL1  | 0.3437702  | 0.01754237 | conserved  | conserved            |
| COCH    | 0.06372928 | 0          | conserved  | conserved            |
| COG1    | 0.27542371 | 0.11267441 | conserved  | conserved            |
| COG2    | 0.74219644 | 0.15731964 | conserved  | conserved            |
| COG3    | 0.64103912 | 0.10236481 | conserved  | conserved            |
| COG4    | 0.51848465 | 0.12350473 | conserved  | conserved            |
| COG5    | 3.37062164 | 0.0251134  | monkey-NSC | conserved            |
| COG6    | 1.60136973 | 0.13422842 | conserved  | conserved            |
| COG7    | 0.54818771 | 0.21253811 | conserved  | conserved            |
| COL11A1 | 1.72303387 | 0.18249429 | monkey-NSC | conserved            |
| COL11A2 | 0.02693587 | 0.08758087 | conserved  | conserved            |
| COL12A1 | 0.11385509 | 0.05206653 | conserved  | conserved            |
| COL14A1 | 0.12732622 | 0.00506985 | conserved  | conserved            |
| COL16A1 | 0.40760658 | 0.13907629 | conserved  | conserved            |
| COL17A1 | 0.00097813 | 0          | conserved  | conserved            |
| COL19A1 | 0.3656696  | 0.02117692 | conserved  | conserved            |
| COL1A1  | 0.00193725 | 0          | conserved  | conserved            |
| COL1A2  | 0.00851462 | 0.0362761  | conserved  | conserved            |
| COL25A1 | 3.11383349 | 0.00818502 | conserved  | conserved            |
| COL26A1 | 0.05920032 | 0.02821543 | conserved  | conserved            |
| COL28A1 | 0.08839335 | 0          | conserved  | conserved            |
| COL2A1  | 0          | 0.09688291 | conserved  | conserved            |
| COL3A1  | 0.00166163 | 0.00373105 | conserved  | conserved            |
| COL4A1  | 0.10348827 | 0.23788525 | conserved  | conserved            |
| COL4A2  | 0.33697772 | 0.11614031 | conserved  | conserved            |
| COL4A3  | 0.04214215 | 0.00336214 | conserved  | conserved            |
| COL4A4  | 0.02873556 | 0.06897672 | conserved  | conserved            |
| COL4A5  | 1.21509307 | 0.16877741 | conserved  | conserved            |
| COL4A6  | 0.10002108 | 0.04224219 | conserved  | conserved            |
| COL5A1  | 2.91494611 | 0.02761651 | conserved  | conserved            |
| COL5A2  | 0.44566202 | 0.12256279 | conserved  | conserved            |
| COL5A3  | 2.91307161 | 0          | monkey-NSC | monkey-NSC1-enriched |

|          |            |            |            |                      |
|----------|------------|------------|------------|----------------------|
| COL6A3   | 0.00782584 | 0.02190846 | conserved  | conserved            |
| COL6A5   | 0.00350855 | 0.00293525 | conserved  | conserved            |
| COL6A6   | 0.01077924 | 0          | conserved  | conserved            |
| COL8A1   | 0.01843085 | 0          | conserved  | conserved            |
| COL8A2   | 0.00252397 | 0.00241743 | conserved  | conserved            |
| COL9A1   | 0.8225162  | 0.19186832 | conserved  | conserved            |
| COL9A2   | 0.80883528 | 0.10205741 | conserved  | conserved            |
| COLEC10  | 0.00276859 | 0          | conserved  | conserved            |
| COLEC12  | 1.21662602 | 0.0100894  | monkey-NSC | monkey-NSC1-enriched |
| COLGALT2 | 0.6013163  | 0.03699481 | conserved  | conserved            |
| COMMD10  | 1.72128917 | 0.32740907 | conserved  | conserved            |
| COMMD2   | 0.08965536 | 0.61129    | conserved  | conserved            |
| COMMD4   | 0.26156976 | 0.80458531 | conserved  | conserved            |
| COMMD5   | 0.02073779 | 0.25313007 | conserved  | conserved            |
| COMMD7   | 0.68412351 | 0.56328851 | conserved  | conserved            |
| COMMD8   | 0.06274265 | 0.73859708 | conserved  | conserved            |
| COMMD9   | 0.42063598 | 0.51421138 | conserved  | conserved            |
| COMT     | 1.37078482 | 1.59447846 | conserved  | conserved            |
| COPA     | 0.79987851 | 0.46577476 | conserved  | conserved            |
| COPB1    | 0.84013556 | 0.47869516 | conserved  | conserved            |
| COPB2    | 0.31695427 | 0.41740392 | conserved  | conserved            |
| COPE     | 0.10653725 | 1.54434577 | conserved  | conserved            |
| COPG1    | 0.27353194 | 0.40001918 | conserved  | conserved            |
| COPG2    | 1.28264061 | 0.29168671 | conserved  | conserved            |
| COPRS    | 0.14357195 | 0.58886841 | conserved  | conserved            |
| COPS3    | 0.35448746 | 0.52736081 | conserved  | conserved            |
| COPS4    | 0.36908874 | 0.96921161 | mouse-RGL  | conserved            |
| COPS5    | 0.28792793 | 1.29006365 | conserved  | conserved            |
| COPS7A   | 0.17886111 | 0.61260742 | conserved  | conserved            |
| COPS7B   | 0.59957639 | 0.41112478 | conserved  | conserved            |
| COPS8    | 0.20336968 | 0.76575967 | conserved  | conserved            |
| COPZ2    | 0.10409128 | 0.26173975 | conserved  | conserved            |
| COQ10B   | 0.23492757 | 0.50413121 | conserved  | conserved            |
| COQ2     | 0.01505257 | 0.28465396 | conserved  | conserved            |
| COQ5     | 0.39678943 | 0.4489507  | conserved  | conserved            |
| COQ6     | 0.19336189 | 0.13695302 | conserved  | conserved            |
| CORIN    | 0.21293792 | 0          | conserved  | conserved            |
| CORO1A   | 0.02967814 | 0.05380399 | conserved  | conserved            |
| CORO1B   | 0.13267276 | 0.40488077 | conserved  | conserved            |
| CORO1C   | 0.40092847 | 0.31245388 | conserved  | conserved            |
| CORO2A   | 0.04310032 | 0.01170606 | conserved  | conserved            |

|        |            |            |            |           |
|--------|------------|------------|------------|-----------|
| CORO2B | 1.90892937 | 1.03024576 | conserved  | conserved |
| CORO6  | 0.17968834 | 0          | conserved  | conserved |
| COTL1  | 0.85358895 | 1.83586106 | conserved  | conserved |
| COX10  | 0.65867521 | 0.31585614 | conserved  | conserved |
| COX11  | 0.18256143 | 0.19665803 | conserved  | conserved |
| COX15  | 0.2058148  | 0.00466381 | conserved  | conserved |
| COX18  | 0.2654491  | 0.1670047  | conserved  | conserved |
| COX20  | 0.23647383 | 1.25574349 | conserved  | conserved |
| COX4I2 | 0.00113213 | 0.38669041 | conserved  | conserved |
| COX6B2 | 0          | 0.37415032 | conserved  | conserved |
| COX7B  | 0.13321599 | 3.36533675 | mouse-RGL  | conserved |
| COX8A  | 0.54871849 | 10.3744993 | conserved  | conserved |
| CP     | 0.0281591  | 0.11770287 | conserved  | conserved |
| CPA3   | 0          | 0          | conserved  | conserved |
| CPA4   | 0.00306138 | 0.00524707 | conserved  | conserved |
| CPA5   | 0.01617042 | 0          | conserved  | conserved |
| CPA6   | 0.05376426 | 0          | conserved  | conserved |
| CPD    | 1.02199629 | 0.57835892 | conserved  | conserved |
| CPE    | 19.4054044 | 8.96009545 | monkey-NSC | conserved |
| CPEB2  | 0.69395716 | 0.07732871 | conserved  | conserved |
| CPEB3  | 6.95028054 | 0.04047112 | monkey-NSC | conserved |
| CPEB4  | 3.83340882 | 0.49658205 | monkey-NSC | conserved |
| CPED1  | 0.34677785 | 0.02204714 | conserved  | conserved |
| CPLX4  | 0.0018938  | 0          | conserved  | conserved |
| CPM    | 0.1309174  | 0.08704194 | conserved  | conserved |
| CPN1   | 0.02531686 | 0          | conserved  | conserved |
| CPNE2  | 0.66555853 | 0.76890252 | conserved  | conserved |
| CPNE3  | 0.49726341 | 0.94194979 | conserved  | conserved |
| CPNE4  | 0.91451841 | 0.06045849 | conserved  | conserved |
| CPNE5  | 0.05513871 | 0.02635507 | conserved  | conserved |
| CPNE6  | 0.08783176 | 0.03256997 | conserved  | conserved |
| CPNE7  | 0.02610701 | 0.00654037 | conserved  | conserved |
| CPNE8  | 0.29453908 | 0.15240804 | conserved  | conserved |
| CPNE9  | 0.23040258 | 0.00398681 | conserved  | conserved |
| CPPED1 | 0.96736741 | 0.20823176 | conserved  | conserved |
| CPQ    | 1.37756207 | 0.0849269  | monkey-NSC | conserved |
| CPS1   | 0.00436113 | 0.00691127 | conserved  | conserved |
| CPSF2  | 0.3996922  | 0.36288707 | conserved  | conserved |
| CPSF3  | 0.67277182 | 0.29287083 | conserved  | conserved |
| CPSF4  | 0.28741939 | 0.17557278 | conserved  | conserved |
| CPSF7  | 0.61119157 | 0.33012603 | conserved  | conserved |

|          |            |            |            |           |
|----------|------------|------------|------------|-----------|
| CPT1A    | 0.67475959 | 0.39986742 | conserved  | conserved |
| CPT1B    | 0.0554181  | 0          | conserved  | conserved |
| CPT1C    | 0.38006351 | 0.29931658 | conserved  | conserved |
| CPT2     | 0.05423147 | 0.11989206 | conserved  | conserved |
| CPVL     | 0.13676624 | 0          | conserved  | conserved |
| CPXM1    | 0.00168468 | 0.15988605 | conserved  | conserved |
| CPXM2    | 0.04421924 | 0.01341897 | conserved  | conserved |
| CPZ      | 0.00055524 | 0          | conserved  | conserved |
| CR2      | 0.00428718 | 0.02544111 | conserved  | conserved |
| CRABP1   | 0.00433701 | 0.00939183 | conserved  | conserved |
| CRABP2   | 0.00177568 | 0.00243806 | conserved  | conserved |
| CRACR2A  | 0.17897469 | 0          | conserved  | conserved |
| CRACR2B  | 0.03489683 | 0.00326065 | conserved  | conserved |
| CRADD    | 3.14133012 | 0.18298492 | monkey-NSC | conserved |
| CRAT     | 0.17383036 | 0.35005185 | conserved  | conserved |
| CRB1     | 4.80707958 | 0.04507954 | conserved  | conserved |
| CRB2     | 0.24506583 | 0.09593292 | conserved  | conserved |
| CRBN     | 0.5147437  | 0.14069497 | conserved  | conserved |
| CREB1    | 0.9433745  | 0.48222989 | conserved  | conserved |
| CREB3    | 0.04360436 | 0.30256816 | conserved  | conserved |
| CREB3L1  | 0.01838325 | 0.06009086 | conserved  | conserved |
| CREB3L2  | 0.328233   | 0.13321557 | conserved  | conserved |
| CREB3L3  | 0.02482255 | 0.00260561 | conserved  | conserved |
| CREB3L4  | 0.02850442 | 0.02056332 | conserved  | conserved |
| CREB5    | 0.44556375 | 0.74746445 | conserved  | conserved |
| CREBL2   | 0.30827915 | 0.10012946 | conserved  | conserved |
| CREBRF   | 0.62004221 | 0.35513598 | conserved  | conserved |
| CREG1    | 0.11481824 | 0.28351446 | conserved  | conserved |
| CREG2    | 0.12764607 | 0.99410822 | conserved  | conserved |
| CRELD1   | 0.52978202 | 0.27807012 | conserved  | conserved |
| CRELD2   | 0.16836012 | 0.28738446 | conserved  | conserved |
| CREM     | 1.02851218 | 0.22938282 | conserved  | conserved |
| CRH      | 0.00694214 | 0.01018514 | conserved  | conserved |
| CRHBP    | 0.01358016 | 0          | conserved  | conserved |
| CRHR2    | 0.0052992  | 0          | conserved  | conserved |
| CRIM1    | 1.77242315 | 0.09485158 | conserved  | conserved |
| CRIP2    | 0.21018537 | 6.299429   | mouse-RGL  | conserved |
| CRIP3    | 0.01846893 | 0          | conserved  | conserved |
| CRISP1   | 0          | 0          | conserved  | conserved |
| CRISPLD1 | 0.05504806 | 0.00822667 | conserved  | conserved |
| CRISPLD2 | 0.16256362 | 0.02509907 | conserved  | conserved |



|            |            |            |            |           |
|------------|------------|------------|------------|-----------|
| CRK        | 0.7656612  | 0.73742471 | conserved  | conserved |
| CRLF3      | 0.36470399 | 0.3791224  | conserved  | conserved |
| CRMP1      | 0.75175657 | 0.46106366 | conserved  | conserved |
| CRNKL1     | 0.17693081 | 0.16261623 | conserved  | conserved |
| CRNN       | 0          | 0          | conserved  | conserved |
| CROT       | 0.26645474 | 0.39091058 | conserved  | conserved |
| CRTAC1     | 0.06591669 | 0.03661124 | conserved  | conserved |
| CRTAP      | 0.08083081 | 0.14943516 | conserved  | conserved |
| CRTC1      | 1.00960004 | 0.41214899 | conserved  | conserved |
| CRTC2      | 0.10056774 | 0.07560489 | conserved  | conserved |
| CRTC3      | 2.41108008 | 0.93881684 | conserved  | conserved |
| CRY1       | 0.49851948 | 0.23530886 | conserved  | conserved |
| CRY2       | 1.28005039 | 0.24481049 | conserved  | conserved |
| CRYAB      | 0.28074034 | 0.62213618 | conserved  | conserved |
| CRYBA1     | 0.0266961  | 0          | conserved  | conserved |
| CRYBA4     | 0.01753533 | 0.0029494  | conserved  | conserved |
| CRYBB1     | 0.01262162 | 0.02000274 | conserved  | conserved |
| CRYBB2     | 0.00125365 | 0          | conserved  | conserved |
| CRYBB3     | 0.00672075 | 0.17643137 | conserved  | conserved |
| CRYGB      | 0.00411397 | 0          | conserved  | conserved |
| CRYGC      | 0          | 0          | conserved  | conserved |
| CRYGN      | 0.00209888 | 0.01419129 | conserved  | conserved |
| CRYGS      | 0.02058373 | 0          | conserved  | conserved |
| CRYL1      | 0.8289841  | 0.09636934 | conserved  | conserved |
| CRYM       | 0.11459894 | 0.22148376 | conserved  | conserved |
| CRYZL1     | 1.64333872 | 0.67706484 | conserved  | conserved |
| CSAD       | 0.89535588 | 0.54424149 | conserved  | conserved |
| CSDC2      | 0.24433643 | 0.99243651 | conserved  | conserved |
| CSDE1      | 1.02990172 | 1.88242251 | conserved  | conserved |
| CSE1L      | 0.47977196 | 0.40121551 | conserved  | conserved |
| CSF1       | 0.18144057 | 0.126766   | conserved  | conserved |
| CSF1R      | 0.03869075 | 0.00559089 | conserved  | conserved |
| CSF3       | 0          | 0          | conserved  | conserved |
| CSF3R      | 0.00729133 | 0          | conserved  | conserved |
| CSGALNACT2 | 0.44534366 | 0.1011621  | conserved  | conserved |
| CSMD2      | 1.81262797 | 0.27998488 | conserved  | conserved |
| CSMD3      | 8.76704578 | 0.02620016 | monkey-NSC | conserved |
| CSN1S1     | 0          | 0          | conserved  | conserved |
| CSN3       | 0          | 0          | conserved  | conserved |
| CSNK1D     | 0.77333463 | 0.75147221 | conserved  | conserved |
| CSNK1G1    | 2.36823117 | 0.3393759  | conserved  | conserved |

|         |            |            |            |           |
|---------|------------|------------|------------|-----------|
| CSNK1G3 | 0.9517302  | 0.42097336 | conserved  | conserved |
| CSNK2A2 | 0.52606051 | 0.07359255 | conserved  | conserved |
| CSPG4   | 0.02018804 | 0.01648954 | conserved  | conserved |
| CSPG5   | 1.88710318 | 6.09552681 | monkey-NSC | conserved |
| CSPP1   | 4.39976362 | 1.02879144 | conserved  | conserved |
| CSRNP1  | 0.03599352 | 0.07010866 | conserved  | conserved |
| CSRNP2  | 0.18074316 | 0.05990218 | conserved  | conserved |
| CSRNP3  | 1.62997899 | 0.02570095 | conserved  | conserved |
| CSRP1   | 1.01198324 | 1.7650871  | conserved  | conserved |
| CSRP2   | 0.03161159 | 0.88763113 | conserved  | conserved |
| CSRP3   | 0          | 0          | conserved  | conserved |
| CST11   | 0          | 0          | conserved  | conserved |
| CST6    | 0.0034863  | 0.02474839 | conserved  | conserved |
| CST7    | 0          | 0          | conserved  | conserved |
| CST8    | 0          | 0          | conserved  | conserved |
| CSTB    | 0.26541349 | 1.40392246 | conserved  | conserved |
| CSTF1   | 0.06491837 | 0.19122685 | conserved  | conserved |
| CSTF2   | 0.08350502 | 0.55671289 | conserved  | conserved |
| CSTF3   | 1.07133599 | 0.44979081 | conserved  | conserved |
| CSTL1   | 0.00219889 | 0          | conserved  | conserved |
| CTBP1   | 0.58466171 | 2.29102565 | conserved  | conserved |
| CTBP2   | 2.48254689 | 0.61289913 | conserved  | conserved |
| CTBS    | 0.05452979 | 0.09514854 | conserved  | conserved |
| CTC1    | 0.13747485 | 0.18120736 | conserved  | conserved |
| CTCF    | 1.37838895 | 0.65462294 | conserved  | conserved |
| CTCFL   | 0.0183812  | 0          | conserved  | conserved |
| CTDNEP1 | 0.20615666 | 0.23498853 | conserved  | conserved |
| CTDP1   | 0.26929768 | 0.04087429 | conserved  | conserved |
| CTDSP2  | 0.5133148  | 0.8691196  | conserved  | conserved |
| CTDSPL2 | 1.18880798 | 0.38529551 | conserved  | conserved |
| CTF1    | 0.02288917 | 0.13919455 | conserved  | conserved |
| CTH     | 0.21902766 | 0.0494068  | conserved  | conserved |
| CTHRC1  | 0.04135701 | 0.75186756 | conserved  | conserved |
| CTIF    | 1.89355657 | 0.09633077 | monkey-NSC | conserved |
| CTLA4   | 0          | 0          | conserved  | conserved |
| CTNNA2  | 44.1346726 | 0.28338405 | conserved  | conserved |
| CTNNA3  | 3.23624783 | 0.02029093 | conserved  | conserved |
| CTNNAL1 | 1.49513333 | 0.21351003 | conserved  | conserved |
| CTNNB1  | 1.03377999 | 1.67638914 | conserved  | conserved |
| CTNND2  | 35.4425323 | 1.04324345 | conserved  | conserved |
| CTNS    | 0.3896276  | 0.13467477 | conserved  | conserved |

|           |            |            |            |           |
|-----------|------------|------------|------------|-----------|
| CTPS2     | 0.46084052 | 0.11346312 | conserved  | conserved |
| CTR9      | 0.23322564 | 0.34631029 | conserved  | conserved |
| CTSA      | 0.12825841 | 0.41407369 | conserved  | conserved |
| CTSB      | 0.28868405 | 1.55211928 | conserved  | conserved |
| CTSC      | 0.13295621 | 0.08376923 | conserved  | conserved |
| CTSF      | 0.02697689 | 0.29625888 | conserved  | conserved |
| CTSH      | 0.03603874 | 0.06944848 | conserved  | conserved |
| CTSO      | 0.14657512 | 0.43684452 | conserved  | conserved |
| CTSS      | 0.24523832 | 0.01461875 | conserved  | conserved |
| CTSW      | 0.00525374 | 0          | conserved  | conserved |
| CTSZ      | 0.00644788 | 0.54838341 | conserved  | conserved |
| CTTN      | 0.85709511 | 0.4440469  | conserved  | conserved |
| CTTNBP2   | 1.65782073 | 1.37868438 | conserved  | conserved |
| CTTNBP2NL | 0.16135213 | 0.20320787 | conserved  | conserved |
| CTXN2     | 0.00813491 | 0.08210711 | conserved  | conserved |
| CUBN      | 0.02863986 | 0.00417185 | conserved  | conserved |
| CUEDC1    | 0.21338102 | 1.39878605 | conserved  | conserved |
| CUL1      | 0.86477205 | 1.06947213 | conserved  | conserved |
| CUL2      | 0.55955481 | 0.18995654 | conserved  | conserved |
| CUL3      | 1.69923699 | 0.58204684 | conserved  | conserved |
| CUL4A     | 1.18048759 | 0.29315574 | monkey-NSC | conserved |
| CUL5      | 2.75813911 | 0.68036872 | conserved  | conserved |
| CUL7      | 0.22492978 | 0.14205324 | conserved  | conserved |
| CUL9      | 0.35369163 | 0.22939479 | conserved  | conserved |
| CUTA      | 0.05709372 | 2.11661313 | conserved  | conserved |
| CUX2      | 0.07613707 | 0.03723319 | conserved  | conserved |
| CWC15     | 0.15036591 | 1.96195679 | mouse-RGL  | conserved |
| CWC25     | 0.13828882 | 0.30954658 | conserved  | conserved |
| CWC27     | 1.90577364 | 0.20106462 | conserved  | conserved |
| CWH43     | 0.02850481 | 0          | conserved  | conserved |
| CX3CL1    | 0.14187468 | 0.05530908 | conserved  | conserved |
| CX3CR1    | 0.02185991 | 0.0097504  | conserved  | conserved |
| CXCL10    | 0          | 0.00541768 | conserved  | conserved |
| CXCL14    | 0.38910785 | 0.91991032 | monkey-NSC | conserved |
| CXCL16    | 0.00479903 | 0.00893592 | conserved  | conserved |
| CXCL9     | 0          | 0          | conserved  | conserved |
| CXCR1     | 0          | 0          | conserved  | conserved |
| CXCR3     | 0.00058515 | 0          | conserved  | conserved |
| CXCR4     | 0.01421986 | 0.32328284 | conserved  | conserved |
| CXCR5     | 0.00087043 | 0          | conserved  | conserved |
| CXCR6     | 0.00096597 | 0          | conserved  | conserved |

|          |            |            |           |           |
|----------|------------|------------|-----------|-----------|
| CXXC1    | 0.18015305 | 0.33337287 | conserved | conserved |
| CXXC5    | 0.36128312 | 0.81760216 | conserved | conserved |
| CYB561   | 0.03118319 | 0.00895999 | conserved | conserved |
| CYB561A3 | 0.03592123 | 0          | conserved | conserved |
| CYB561D1 | 0.09861641 | 0.05593099 | conserved | conserved |
| CYB561D2 | 0.13945234 | 0.20551191 | conserved | conserved |
| CYB5B    | 0.83715076 | 0.7226212  | conserved | conserved |
| CYB5D2   | 0.38918276 | 0.22158588 | conserved | conserved |
| CYB5R1   | 0.06178861 | 0.05372908 | conserved | conserved |
| CYB5R2   | 0.00188164 | 0.00729035 | conserved | conserved |
| CYB5R3   | 0.26508142 | 0.34128395 | conserved | conserved |
| CYB5R4   | 0.91709513 | 0.17916719 | conserved | conserved |
| CYBB     | 0.00515466 | 0          | conserved | conserved |
| CYBRD1   | 0.40816371 | 0.3495671  | conserved | conserved |
| CYC1     | 0.28418937 | 1.73661952 | mouse-RGL | conserved |
| CYFIP1   | 0.61936669 | 0.41532978 | conserved | conserved |
| CYFIP2   | 3.07853523 | 0.14921531 | conserved | conserved |
| CYHR1    | 0.52442383 | 0.78357805 | conserved | conserved |
| CYLC1    | 0.03490534 | 0          | conserved | conserved |
| CYLC2    | 0          | 0          | conserved | conserved |
| CYLD     | 0.24860316 | 0.08399695 | conserved | conserved |
| CYP17A1  | 0.01540211 | 0          | conserved | conserved |
| CYP19A1  | 0.005475   | 0          | conserved | conserved |
| CYP1A1   | 0          | 0          | conserved | conserved |
| CYP1A2   | 0.00098122 | 0          | conserved | conserved |
| CYP1B1   | 0.00519974 | 0.95597664 | conserved | conserved |
| CYP24A1  | 0.0012013  | 0          | conserved | conserved |
| CYP26A1  | 0.00118616 | 0          | conserved | conserved |
| CYP26B1  | 0.0067453  | 0.01502827 | conserved | conserved |
| CYP26C1  | 0          | 0          | conserved | conserved |
| CYP27A1  | 1.24116862 | 0          | conserved | conserved |
| CYP27B1  | 0.0045627  | 0          | conserved | conserved |
| CYP2R1   | 0.04063079 | 0          | conserved | conserved |
| CYP2S1   | 0.00154863 | 0          | conserved | conserved |
| CYP39A1  | 0.36357853 | 0.16724344 | conserved | conserved |
| CYP46A1  | 1.33212361 | 0.18447709 | conserved | conserved |
| CYP4B1   | 0          | 0          | conserved | conserved |
| CYP4X1   | 0.07362667 | 0          | conserved | conserved |
| CYP7A1   | 0.00609578 | 0          | conserved | conserved |
| CYP7B1   | 0.92826094 | 0.21839397 | conserved | conserved |
| CYP8B1   | 0.00152713 | 0          | conserved | conserved |

|         |            |            |            |           |
|---------|------------|------------|------------|-----------|
| CYSLTR1 | 0.01743714 | 0          | conserved  | conserved |
| CYTH1   | 1.33158915 | 0.23224685 | conserved  | conserved |
| CYTH4   | 0.00904912 | 0.00595068 | conserved  | conserved |
| CYTIP   | 0.00826706 | 0          | conserved  | conserved |
| D2HGDH  | 0.65205279 | 0.06964102 | conserved  | conserved |
| DAAM1   | 2.06087254 | 0.73600468 | conserved  | conserved |
| DAAM2   | 7.95889192 | 0.50624276 | monkey-NSC | conserved |
| DAB1    | 6.09696732 | 1.79921182 | conserved  | conserved |
| DAB2    | 0.07340261 | 0.18310664 | conserved  | conserved |
| DAB2IP  | 0.61204522 | 0.18541494 | conserved  | conserved |
| DACH1   | 0.34788092 | 0.23799591 | conserved  | conserved |
| DACT1   | 0.05098555 | 0.0526826  | conserved  | conserved |
| DAD1    | 0.10812943 | 2.19695685 | conserved  | conserved |
| DAG1    | 1.32888494 | 1.44756751 | conserved  | conserved |
| DAGLB   | 0.24175448 | 0.20661518 | conserved  | conserved |
| DALRD3  | 0.10439067 | 0.54221669 | conserved  | conserved |
| DAND5   | 0          | 0.16309014 | conserved  | conserved |
| DAO     | 0.0028335  | 0          | conserved  | conserved |
| DAP3    | 0.97010456 | 0.76257118 | conserved  | conserved |
| DAPK1   | 6.57912927 | 0.20533004 | conserved  | conserved |
| DAPK2   | 0.05898231 | 0.17287159 | conserved  | conserved |
| DAPP1   | 0.00387095 | 0.14384997 | conserved  | conserved |
| DARS2   | 0.22311254 | 0.04799051 | conserved  | conserved |
| DAW1    | 0.00947174 | 0.01390855 | conserved  | conserved |
| DAZAP1  | 1.06982929 | 0.94123485 | conserved  | conserved |
| DBF4    | 0.16339329 | 0.07680789 | conserved  | conserved |
| DBH     | 0.00364747 | 0          | conserved  | conserved |
| DBN1    | 0.17448715 | 0.56570961 | conserved  | conserved |
| DBNDD1  | 0.03900979 | 0.09134149 | conserved  | conserved |
| DBNL    | 0.33186626 | 0.55991846 | conserved  | conserved |
| DBR1    | 0.13301615 | 0.0920733  | conserved  | conserved |
| DBT     | 1.27597503 | 0.31518905 | conserved  | conserved |
| DBX1    | 0.00089192 | 0          | conserved  | conserved |
| DCAF10  | 0.89099832 | 0.1493847  | conserved  | conserved |
| DCAF11  | 0.12514688 | 0.69499004 | conserved  | conserved |
| DCAF12  | 0.2823001  | 0.56882835 | conserved  | conserved |
| DCAF17  | 0.34667005 | 0.33589157 | conserved  | conserved |
| DCAF5   | 2.19610985 | 0.16887135 | conserved  | conserved |
| DCAF6   | 2.17197278 | 0.31588472 | conserved  | conserved |
| DCBLD1  | 0.22434059 | 0.06392485 | conserved  | conserved |
| DCBLD2  | 0.54359482 | 0.09001838 | conserved  | conserved |

|         |            |            |            |           |
|---------|------------|------------|------------|-----------|
| DCC     | 13.4258245 | 0.02343245 | conserved  | conserved |
| DCDC2B  | 0.0759417  | 0          | conserved  | conserved |
| DCDC2C  | 0.00375762 | 0          | conserved  | conserved |
| DCHS1   | 0.2971786  | 0.26339921 | conserved  | conserved |
| DCK     | 0.06678192 | 0.26580279 | conserved  | conserved |
| DCLK1   | 11.7918876 | 5.81205391 | conserved  | conserved |
| DCLK2   | 5.07117943 | 0.3492502  | conserved  | conserved |
| DCLK3   | 0.02960773 | 0.01956318 | conserved  | conserved |
| DCLRE1A | 0.0619079  | 0.20452356 | conserved  | conserved |
| DCLRE1B | 0.03730105 | 0.07871728 | conserved  | conserved |
| DCLRE1C | 0.36480191 | 0.03525254 | conserved  | conserved |
| DCN     | 0.01535498 | 0.16230969 | conserved  | conserved |
| DCP1A   | 1.16875622 | 0.06625529 | conserved  | conserved |
| DCP1B   | 0.61872485 | 0.138556   | conserved  | conserved |
| DCP2    | 0.28645078 | 0.18420048 | conserved  | conserved |
| DCPS    | 0.12993491 | 0.33013524 | conserved  | conserved |
| DCST1   | 0.00611741 | 0.0066255  | conserved  | conserved |
| DCST2   | 0.0300306  | 0.00302008 | conserved  | conserved |
| DCSTAMP | 0          | 0          | conserved  | conserved |
| DCT     | 0.02626334 | 0.06992557 | conserved  | conserved |
| DCTD    | 0.27122643 | 0.16982041 | conserved  | conserved |
| DCTN2   | 0.31100346 | 1.34790924 | conserved  | conserved |
| DCTN3   | 0.17864963 | 1.5399841  | mouse-RGL  | conserved |
| DCTN4   | 0.65880359 | 0.69585093 | conserved  | conserved |
| DCTN5   | 0.09758155 | 0.3969598  | conserved  | conserved |
| DCTN6   | 0.36210107 | 0.40847434 | conserved  | conserved |
| DCTPP1  | 0.03780596 | 1.50212562 | mouse-RGL  | conserved |
| DCUN1D2 | 1.53643655 | 0.10548895 | monkey-NSC | conserved |
| DCUN1D4 | 0.95556334 | 0.11811067 | conserved  | conserved |
| DCUN1D5 | 0.32436808 | 1.73945723 | conserved  | conserved |
| DCX     | 1.24270725 | 0.37425395 | conserved  | conserved |
| DCXR    | 0.03102966 | 0.35671045 | conserved  | conserved |
| DDAH1   | 3.45805787 | 5.03423065 | conserved  | conserved |
| DDAH2   | 0.29867279 | 2.90460891 | mouse-RGL  | conserved |
| DDB1    | 0.75432857 | 0.74176551 | conserved  | conserved |
| DDC     | 0.01122802 | 0.01258769 | conserved  | conserved |
| DDHD1   | 1.80350377 | 0.27904256 | monkey-NSC | conserved |
| DDHD2   | 0.35105149 | 0.21845755 | conserved  | conserved |
| DDIAS   | 0.00350345 | 0.009699   | conserved  | conserved |
| DDIT3   | 0.16764024 | 0.42325819 | conserved  | conserved |
| DDIT4   | 0.39928907 | 0.90160001 | conserved  | conserved |

|         |            |            |           |           |
|---------|------------|------------|-----------|-----------|
| DDOST   | 0.20563027 | 0.78395246 | conserved | conserved |
| DDR1    | 0.78140943 | 0.77922936 | conserved | conserved |
| DDR2    | 0.24319386 | 0.02362839 | conserved | conserved |
| DDRGK1  | 0.26582027 | 1.28801849 | conserved | conserved |
| DDX1    | 0.37567574 | 0.59993815 | conserved | conserved |
| DDX10   | 0.64552945 | 0.16229605 | conserved | conserved |
| DDX17   | 7.61990627 | 1.38161682 | conserved | conserved |
| DDX18   | 0.63950995 | 0.62718827 | conserved | conserved |
| DDX23   | 0.20162207 | 0.07187238 | conserved | conserved |
| DDX24   | 1.72817963 | 1.14399697 | conserved | conserved |
| DDX25   | 0.19531565 | 0.10754573 | conserved | conserved |
| DDX27   | 0.20365495 | 0.28691182 | conserved | conserved |
| DDX28   | 0.00120409 | 0.06852814 | conserved | conserved |
| DDX31   | 0.51838652 | 0.06797405 | conserved | conserved |
| DDX39B  | 0.54332539 | 2.03846275 | mouse-RGL | conserved |
| DDX3X   | 1.17536764 | 1.60832997 | conserved | conserved |
| DDX4    | 0.07066878 | 0.00322465 | conserved | conserved |
| DDX42   | 0.65672431 | 0.49985768 | conserved | conserved |
| DDX47   | 0.11774475 | 0.22874147 | conserved | conserved |
| DDX49   | 0.17300521 | 0.22579694 | conserved | conserved |
| DDX5    | 2.54816236 | 6.43157099 | conserved | conserved |
| DDX50   | 0.96281609 | 0.49757657 | conserved | conserved |
| DDX52   | 0.16437409 | 0.29472068 | conserved | conserved |
| DDX54   | 0.20385781 | 0.30348661 | conserved | conserved |
| DDX55   | 0.34468949 | 0.2150408  | conserved | conserved |
| DDX56   | 0.04905766 | 0.22517616 | conserved | conserved |
| DDX59   | 0.34938807 | 0.06765834 | conserved | conserved |
| DDX6    | 0.89989794 | 0.55078634 | conserved | conserved |
| DDX60   | 0.03054581 | 0.02595348 | conserved | conserved |
| DEAF1   | 0.29308434 | 0.52305879 | conserved | conserved |
| DECR1   | 1.11617736 | 0.36084329 | conserved | conserved |
| DEDD    | 0.12761434 | 0.19909565 | conserved | conserved |
| DEF8    | 0.41689248 | 0.16665745 | conserved | conserved |
| DENND1A | 6.88238739 | 0.58495973 | conserved | conserved |
| DENND1B | 1.63293119 | 0.28000894 | conserved | conserved |
| DENND1C | 0.00344897 | 0.00135972 | conserved | conserved |
| DENND2A | 3.22846313 | 0.37777943 | conserved | conserved |
| DENND2C | 0.07619163 | 0.00673309 | conserved | conserved |
| DENND3  | 0.15252638 | 0.00135972 | conserved | conserved |
| DENND4A | 1.76187303 | 0.11689591 | conserved | conserved |
| DENND4B | 0.16832702 | 0.09430253 | conserved | conserved |

|         |            |            |            |           |
|---------|------------|------------|------------|-----------|
| DENND4C | 2.00594589 | 0.13389336 | conserved  | conserved |
| DENND5A | 1.59929183 | 0.9485649  | conserved  | conserved |
| DENND5B | 2.08874215 | 0.43342721 | conserved  | conserved |
| DENND6A | 1.5493336  | 0.22190175 | conserved  | conserved |
| DENND6B | 0.63601647 | 0.08756039 | conserved  | conserved |
| DENR    | 0.45211408 | 1.47819655 | conserved  | conserved |
| DEPDC1B | 0.04251619 | 0          | conserved  | conserved |
| DEPDC7  | 0.00394828 | 0.02551039 | conserved  | conserved |
| DEPTOR  | 0.31167381 | 0.20644981 | conserved  | conserved |
| DERA    | 0.50046123 | 0.18258251 | conserved  | conserved |
| DERL1   | 0.2793406  | 0.49080588 | conserved  | conserved |
| DERL2   | 0.16199501 | 0.39465481 | conserved  | conserved |
| DERL3   | 0.00118888 | 0.01352498 | conserved  | conserved |
| DES     | 0.00109309 | 0          | conserved  | conserved |
| DESI2   | 0.68354492 | 1.11754519 | conserved  | conserved |
| DFFA    | 0.11570562 | 0.1051312  | conserved  | conserved |
| DFFB    | 0.1720376  | 0.06452045 | conserved  | conserved |
| DGAT1   | 0.09846043 | 0.11814133 | conserved  | conserved |
| DGAT2   | 0.01535688 | 0.05289263 | conserved  | conserved |
| DGAT2L6 | 0.00789904 | 0          | conserved  | conserved |
| DGKB    | 12.4276811 | 0.13044708 | monkey-NSC | conserved |
| DGKD    | 0.69775987 | 0.15874379 | conserved  | conserved |
| DGKE    | 0.16906904 | 0.05636014 | conserved  | conserved |
| DGKH    | 0.81797742 | 0.0158353  | conserved  | conserved |
| DGKI    | 1.62090741 | 0.00733922 | monkey-NSC | conserved |
| DGKQ    | 0.01775283 | 0.09617727 | conserved  | conserved |
| DGKZ    | 0.43237728 | 0.19089148 | conserved  | conserved |
| DGUOK   | 0.28931068 | 0.53411135 | conserved  | conserved |
| DHCR24  | 0.10166435 | 0.482632   | conserved  | conserved |
| DHCR7   | 0.05212578 | 0.4660293  | conserved  | conserved |
| DHDDS   | 0.78110384 | 0.20632346 | conserved  | conserved |
| DHH     | 0          | 0          | conserved  | conserved |
| DHRS1   | 0.11344345 | 1.83716208 | mouse-RGL  | conserved |
| DHRS2   | 0.00074001 | 0.00495317 | conserved  | conserved |
| DHRS3   | 0.35105981 | 0.70086871 | conserved  | conserved |
| DHRS7   | 0.07293037 | 0.15942471 | conserved  | conserved |
| DHRS7B  | 0.59925439 | 0.23820185 | conserved  | conserved |
| DHRS7C  | 0.00861207 | 0          | conserved  | conserved |
| DHRS9   | 0.00580745 | 0          | conserved  | conserved |
| DHX15   | 0.60509364 | 0.8239563  | conserved  | conserved |
| DHX16   | 0.07111821 | 0.11133484 | conserved  | conserved |



|        |            |            |           |           |
|--------|------------|------------|-----------|-----------|
| DHX29  | 0.78162053 | 0.14749618 | conserved | conserved |
| DHX30  | 0.98311172 | 1.30583481 | conserved | conserved |
| DHX32  | 0.90115193 | 0.47356172 | conserved | conserved |
| DHX35  | 0.44422582 | 0.03916511 | conserved | conserved |
| DHX36  | 1.50543633 | 0.56841835 | conserved | conserved |
| DHX37  | 0.24472786 | 0.07668893 | conserved | conserved |
| DHX38  | 0.2073746  | 0.06649579 | conserved | conserved |
| DHX58  | 0.08362929 | 0.02792942 | conserved | conserved |
| DHX8   | 0.40720845 | 0.12773193 | conserved | conserved |
| DHX9   | 1.40439293 | 0.46039067 | conserved | conserved |
| DIAPH1 | 0.35515511 | 0.16745465 | conserved | conserved |
| DIAPH3 | 0.89946114 | 0.24465341 | conserved | conserved |
| DICER1 | 1.16025296 | 0.4365635  | conserved | conserved |
| DIDO1  | 0.80672221 | 0.46103996 | conserved | conserved |
| DIMT1  | 0.19398756 | 0.16401567 | conserved | conserved |
| DIO1   | 0.03189181 | 0          | conserved | conserved |
| DIP2A  | 0.82629687 | 0.22438276 | conserved | conserved |
| DIP2B  | 2.1060362  | 0.55160334 | conserved | conserved |
| DIP2C  | 3.16412706 | 0.12155302 | conserved | conserved |
| DIRAS2 | 0.08883068 | 0.14378413 | conserved | conserved |
| DIS3   | 0.12267473 | 0.13203021 | conserved | conserved |
| DIS3L  | 0.3936496  | 0.11176349 | conserved | conserved |
| DIS3L2 | 2.99869143 | 0.16299632 | conserved | conserved |
| DISC1  | 0.66070551 | 0.0101858  | conserved | conserved |
| DISP1  | 0.70375528 | 0.03091701 | conserved | conserved |
| DISP2  | 0.01347214 | 0.02571005 | conserved | conserved |
| DIXDC1 | 1.3081872  | 0.09738867 | conserved | conserved |
| DKK1   | 0.0022917  | 0          | conserved | conserved |
| DKK2   | 0.08461391 | 0.00880294 | conserved | conserved |
| DKK3   | 0.83316359 | 0.99645462 | conserved | conserved |
| DKK4   | 0          | 0          | conserved | conserved |
| DLD    | 0.2740406  | 0.45928615 | conserved | conserved |
| DLEC1  | 0.06929952 | 0.00642344 | conserved | conserved |
| DLG1   | 4.59886615 | 0.19106207 | conserved | conserved |
| DLG2   | 21.3982559 | 0.05502116 | conserved | conserved |
| DLG3   | 0.2784062  | 0.07150832 | conserved | conserved |
| DLG4   | 0.68431916 | 0.26308136 | conserved | conserved |
| DLG5   | 1.55129554 | 0.32472479 | conserved | conserved |
| DLGAP3 | 0.11936568 | 0.04687173 | conserved | conserved |
| DLGAP4 | 1.33383944 | 0.83710533 | conserved | conserved |
| DLGAP5 | 0.01737047 | 0.0114168  | conserved | conserved |

|         |            |            |            |           |
|---------|------------|------------|------------|-----------|
| DLK1    | 0          | 0.00306181 | conserved  | conserved |
| DLL1    | 0.0222033  | 0.1218713  | conserved  | conserved |
| DLL3    | 0.0015414  | 0.05843198 | conserved  | conserved |
| DLL4    | 0          | 0.03366076 | conserved  | conserved |
| DLST    | 0.29819743 | 0.27110383 | conserved  | conserved |
| DLX1    | 0.01215884 | 0.03198833 | conserved  | conserved |
| DLX3    | 0.00074534 | 0          | conserved  | conserved |
| DLX4    | 0          | 0          | conserved  | conserved |
| DLX6    | 0          | 0.00769978 | conserved  | conserved |
| DMAP1   | 0.06813323 | 0.19395656 | conserved  | conserved |
| DMBX1   | 0.00231192 | 0          | conserved  | conserved |
| DMD     | 11.0275306 | 0.74916415 | monkey-NSC | conserved |
| DMGDH   | 0.15410002 | 0          | conserved  | conserved |
| DMP1    | 0          | 0          | conserved  | conserved |
| DMRT2   | 0          | 0          | conserved  | conserved |
| DMRTC2  | 0.00253585 | 0          | conserved  | conserved |
| DMTF1   | 1.7817079  | 0.38016603 | conserved  | conserved |
| DMTN    | 0.068709   | 0.0208825  | conserved  | conserved |
| DMXL1   | 2.77722629 | 0.23752051 | conserved  | conserved |
| DMXL2   | 2.1795997  | 0.23230441 | conserved  | conserved |
| DNAAF1  | 0.00990829 | 0          | conserved  | conserved |
| DNAAF2  | 0.06501117 | 0.20435477 | conserved  | conserved |
| DNAH1   | 0.01632635 | 0.0103552  | conserved  | conserved |
| DNAH10  | 0.0839079  | 0          | conserved  | conserved |
| DNAH2   | 0.08757091 | 0.01102435 | conserved  | conserved |
| DNAH3   | 0.06507122 | 0.00358835 | conserved  | conserved |
| DNAH5   | 0.0933365  | 0.08827349 | conserved  | conserved |
| DNAH6   | 0.64820371 | 0.01912408 | conserved  | conserved |
| DNAH8   | 0.06320515 | 0.00950831 | conserved  | conserved |
| DNAH9   | 1.22359412 | 0.02128607 | conserved  | conserved |
| DNAJA3  | 0.22913672 | 0.25687099 | conserved  | conserved |
| DNAJA4  | 0.0905866  | 0.07795508 | conserved  | conserved |
| DNAJB12 | 0.35171905 | 0.11882985 | conserved  | conserved |
| DNAJB13 | 0.20391975 | 0.05221515 | conserved  | conserved |
| DNAJB14 | 0.94618702 | 0.43885796 | conserved  | conserved |
| DNAJB2  | 0.13960034 | 0.53319911 | conserved  | conserved |
| DNAJB4  | 0.73913389 | 0.80815312 | conserved  | conserved |
| DNAJB5  | 0.12791996 | 0.11249774 | conserved  | conserved |
| DNAJB6  | 0.51884848 | 1.85872659 | mouse-RGL  | conserved |
| DNAJC1  | 2.41264087 | 0.78262352 | conserved  | conserved |
| DNAJC10 | 0.3653486  | 0.43657724 | conserved  | conserved |

|          |            |            |            |           |
|----------|------------|------------|------------|-----------|
| DNAJC11  | 0.69839528 | 0.27869186 | conserved  | conserved |
| DNAJC12  | 0.04092478 | 0.18463048 | conserved  | conserved |
| DNAJC13  | 0.76550085 | 0.229965   | conserved  | conserved |
| DNAJC15  | 0.37226955 | 0.96719505 | conserved  | conserved |
| DNAJC16  | 0.56365569 | 0.08210395 | conserved  | conserved |
| DNAJC18  | 0.37725821 | 0.5096167  | conserved  | conserved |
| DNAJC2   | 0.55352977 | 0.51567054 | conserved  | conserved |
| DNAJC21  | 0.20029193 | 0.12448221 | conserved  | conserved |
| DNAJC22  | 0.00171918 | 0          | conserved  | conserved |
| DNAJC27  | 0.40758695 | 0.0960339  | conserved  | conserved |
| DNAJC28  | 0.0056298  | 0.0689411  | conserved  | conserved |
| DNAJC3   | 0.61038428 | 0.45619971 | conserved  | conserved |
| DNAJC4   | 0.06880636 | 0.1927007  | conserved  | conserved |
| DNAJC5B  | 0.00409212 | 0          | conserved  | conserved |
| DNAJC6   | 0.90717416 | 0.0789648  | conserved  | conserved |
| DNAJC9   | 0.18221426 | 0.68992073 | conserved  | conserved |
| DNAL1    | 0.30998088 | 0.08098274 | conserved  | conserved |
| DNALI1   | 0.03774278 | 0.00769582 | conserved  | conserved |
| DNASE1   | 0.4683949  | 0          | conserved  | conserved |
| DNASE1L1 | 0.01964001 | 0.04386646 | conserved  | conserved |
| DNASE1L2 | 0.02737495 | 0.0237796  | conserved  | conserved |
| DNASE1L3 | 0.0020828  | 0          | conserved  | conserved |
| DNASE2B  | 0          | 0          | conserved  | conserved |
| DND1     | 0.01617582 | 0.00658299 | conserved  | conserved |
| DNER     | 0.69066555 | 0.16411237 | conserved  | conserved |
| DNLZ     | 0.05081062 | 1.37526013 | mouse-RGL  | conserved |
| DNM1     | 1.26959816 | 0.10646706 | conserved  | conserved |
| DNM1L    | 1.68109169 | 0.56105077 | conserved  | conserved |
| DNM2     | 1.57985254 | 0.24771873 | conserved  | conserved |
| DNM3     | 6.18698626 | 0.19670722 | monkey-NSC | conserved |
| DNMBP    | 0.41048398 | 0.00364845 | conserved  | conserved |
| DNMT1    | 1.66371298 | 0.283653   | conserved  | conserved |
| DNMT3A   | 2.31912163 | 0.69038166 | monkey-NSC | conserved |
| DNPEP    | 0.34046159 | 0.48102028 | conserved  | conserved |
| DNPH1    | 0.01206659 | 0.13802282 | conserved  | conserved |
| DNTT     | 0.02090114 | 0          | conserved  | conserved |
| DNTTIP1  | 0.18250824 | 0.2386531  | conserved  | conserved |
| DOC2A    | 0.04450496 | 0.01323079 | conserved  | conserved |
| DOC2B    | 0.11630752 | 0.01331166 | conserved  | conserved |
| DOCK1    | 6.62279529 | 0.40850829 | monkey-NSC | conserved |
| DOCK10   | 1.62776177 | 0.03642401 | conserved  | conserved |

|         |            |            |            |                      |
|---------|------------|------------|------------|----------------------|
| DOCK11  | 0.17011694 | 0.19516025 | conserved  | conserved            |
| DOCK2   | 0.08629414 | 0          | conserved  | conserved            |
| DOCK3   | 8.28526037 | 0.15403097 | conserved  | conserved            |
| DOCK4   | 8.49452759 | 0.03841758 | monkey-NSC | conserved            |
| DOCK5   | 1.13224358 | 0          | monkey-NSC | monkey-NSC1-enriched |
| DOCK7   | 4.27996691 | 0.44400629 | monkey-NSC | conserved            |
| DOCK8   | 0.06710699 | 0.00569293 | conserved  | conserved            |
| DOCK9   | 1.16636324 | 0.08538318 | conserved  | conserved            |
| DOK1    | 0.02273373 | 0.09825238 | conserved  | conserved            |
| DOK2    | 0.00175126 | 0.00394278 | conserved  | conserved            |
| DOK4    | 0.04915045 | 0.05335771 | conserved  | conserved            |
| DOK5    | 2.55455363 | 0.94755629 | conserved  | conserved            |
| DOK6    | 2.10576022 | 0.03557758 | conserved  | conserved            |
| DOK7    | 0.00368476 | 0.02711948 | conserved  | conserved            |
| DOLPP1  | 0.03548226 | 0.19564156 | conserved  | conserved            |
| DPAGT1  | 0.06511077 | 0.14410174 | conserved  | conserved            |
| DPCD    | 0.22451062 | 0.59651514 | conserved  | conserved            |
| DPEP1   | 0.00673778 | 0          | conserved  | conserved            |
| DPEP3   | 0.00073182 | 0          | conserved  | conserved            |
| DPF1    | 0.20354303 | 0.17922231 | conserved  | conserved            |
| DPF3    | 4.45950184 | 0.18554477 | monkey-NSC | conserved            |
| DPH1    | 0.13538731 | 0          | conserved  | conserved            |
| DPH2    | 0.06429613 | 0.0719887  | conserved  | conserved            |
| DPH5    | 0.55549046 | 0.14935866 | conserved  | conserved            |
| DPH6    | 1.0766289  | 0.47441894 | conserved  | conserved            |
| DPH7    | 0.13595054 | 0.0729893  | conserved  | conserved            |
| DPP10   | 60.8926487 | 0.01166977 | conserved  | conserved            |
| DPP3    | 0.37383263 | 0.10450296 | conserved  | conserved            |
| DPP4    | 0.00863642 | 0          | conserved  | conserved            |
| DPP6    | 4.62613259 | 0.08488169 | conserved  | conserved            |
| DPP7    | 0.61524407 | 0.07851961 | conserved  | conserved            |
| DPP8    | 1.85457772 | 0.25506181 | monkey-NSC | conserved            |
| DPP9    | 0.27747435 | 0.14315533 | conserved  | conserved            |
| DPPA4   | 0.00557946 | 0          | conserved  | conserved            |
| DPT     | 0          | 0          | conserved  | conserved            |
| DPY19L3 | 1.38878808 | 0.32863453 | conserved  | conserved            |
| DPY19L4 | 0.5465633  | 0.23269536 | conserved  | conserved            |
| DPY30   | 0.38663292 | 1.79051505 | conserved  | conserved            |
| DPYD    | 3.30079679 | 0.01548038 | conserved  | conserved            |
| DPYS    | 0.03691288 | 0          | conserved  | conserved            |
| DPYSL2  | 3.08348472 | 4.47875417 | conserved  | conserved            |

|         |            |            |            |           |
|---------|------------|------------|------------|-----------|
| DPYSL3  | 0.15736918 | 1.29427757 | mouse-RGL  | conserved |
| DPYSL4  | 0.08533305 | 0.64764821 | conserved  | conserved |
| DPYSL5  | 0.67563347 | 0.44699003 | conserved  | conserved |
| DQX1    | 0.01878764 | 0.01358946 | conserved  | conserved |
| DRAM1   | 0.01753958 | 0          | conserved  | conserved |
| DRAP1   | 0.08705006 | 1.27899306 | conserved  | conserved |
| DRC7    | 0.00402346 | 0.00570729 | conserved  | conserved |
| DRD1    | 0.01924776 | 0.00644284 | conserved  | conserved |
| DRD2    | 0.00537333 | 0          | conserved  | conserved |
| DRD3    | 0.00700868 | 0          | conserved  | conserved |
| DRD5    | 0          | 0.00671526 | conserved  | conserved |
| DRG2    | 0.14496108 | 0.30036364 | conserved  | conserved |
| DROSHA  | 1.02989643 | 0.22037089 | conserved  | conserved |
| DRP2    | 0.10225382 | 0.09810229 | conserved  | conserved |
| DSCAM   | 2.7009848  | 0.04511122 | conserved  | conserved |
| DSCAML1 | 1.35895926 | 0.0746532  | conserved  | conserved |
| DSCC1   | 0          | 0.01948355 | conserved  | conserved |
| DSEL    | 0.07385712 | 0.08857683 | conserved  | conserved |
| DSP     | 0.01090795 | 0          | conserved  | conserved |
| DSTYK   | 0.66481267 | 0.17430554 | conserved  | conserved |
| DTD2    | 0.10372899 | 0.47405263 | conserved  | conserved |
| DTHD1   | 0.02318535 | 0          | conserved  | conserved |
| DTL     | 0.0070459  | 0.39922502 | conserved  | conserved |
| DTNA    | 22.8404371 | 2.00236652 | monkey-NSC | conserved |
| DTNBP1  | 1.63744542 | 0.20214884 | conserved  | conserved |
| DTWD2   | 0.72081103 | 0.09277787 | conserved  | conserved |
| DTX2    | 0.23749011 | 0.10662369 | conserved  | conserved |
| DTX3    | 0.28489307 | 1.28188748 | conserved  | conserved |
| DTX4    | 0.31867521 | 0.23537775 | conserved  | conserved |
| DTYMK   | 0.03364059 | 1.94994251 | mouse-RGL  | conserved |
| DUOX1   | 0.0472052  | 0          | conserved  | conserved |
| DUOX2   | 0          | 0          | conserved  | conserved |
| DUOXA1  | 0.00113502 | 0          | conserved  | conserved |
| DUOXA2  | 0          | 0.00405985 | conserved  | conserved |
| DUS1L   | 0.1376506  | 0.24869784 | conserved  | conserved |
| DUS2    | 0.53858163 | 0.09028336 | conserved  | conserved |
| DUSP10  | 0.08558942 | 0.2131446  | conserved  | conserved |
| DUSP11  | 0.21942055 | 0.80085758 | conserved  | conserved |
| DUSP14  | 0.02989651 | 0.23959888 | conserved  | conserved |
| DUSP15  | 0.03564763 | 0.07033603 | conserved  | conserved |
| DUSP16  | 0.9053557  | 0.2602074  | conserved  | conserved |

|          |            |            |            |           |
|----------|------------|------------|------------|-----------|
| DUSP19   | 0.0455052  | 0.1543785  | conserved  | conserved |
| DUSP22   | 0.3069289  | 0.12109458 | conserved  | conserved |
| DUSP23   | 0.03220892 | 0.05928219 | conserved  | conserved |
| DUSP26   | 0.10396517 | 0.02819439 | conserved  | conserved |
| DUSP4    | 0.00433964 | 0.01695047 | conserved  | conserved |
| DUSP6    | 0.0559286  | 0.24015251 | conserved  | conserved |
| DUSP7    | 0.01220589 | 0.03759487 | conserved  | conserved |
| DUSP8    | 0.00572836 | 0.31342085 | conserved  | conserved |
| DVL3     | 0.14958604 | 0.08164404 | conserved  | conserved |
| DXO      | 0.0124952  | 0.41380403 | conserved  | conserved |
| DYDC1    | 0.01644763 | 0          | conserved  | conserved |
| DYDC2    | 0.04055737 | 0.03915335 | conserved  | conserved |
| DYM      | 2.55505063 | 0.18626154 | monkey-NSC | conserved |
| DYNAP    | 0          | 0          | conserved  | conserved |
| DYNC1I1  | 2.18967241 | 0.04903651 | monkey-NSC | conserved |
| DYNC1I2  | 1.00579434 | 1.25953238 | conserved  | conserved |
| DYNC1LI1 | 0.5375263  | 0.30395529 | conserved  | conserved |
| DYNC1LI2 | 0.76717987 | 0.40607923 | conserved  | conserved |
| DYNC2H1  | 4.591177   | 0.35098419 | conserved  | conserved |
| DYNLRB1  | 0.44242074 | 4.42277847 | mouse-RGL  | conserved |
| DYNLRB2  | 0.15342378 | 0.10013888 | conserved  | conserved |
| DYNLT3   | 0.09362105 | 0.7597098  | conserved  | conserved |
| DYRK1A   | 2.04595701 | 0.3201103  | conserved  | conserved |
| DYRK1B   | 0.10683396 | 0.0296092  | conserved  | conserved |
| DYRK2    | 0.06175631 | 0.00626813 | conserved  | conserved |
| DYRK3    | 0.06005296 | 0.08560506 | conserved  | conserved |
| DYRK4    | 0.03186698 | 0          | conserved  | conserved |
| DYSF     | 0.21426949 | 0.00741304 | conserved  | conserved |
| DYTN     | 0.01443987 | 0          | conserved  | conserved |
| DZANK1   | 0.58061987 | 0.10546233 | conserved  | conserved |
| DZIP1    | 1.20689564 | 0.26267625 | monkey-NSC | conserved |
| DZIP1L   | 0.0328082  | 0.10012114 | conserved  | conserved |
| DZIP3    | 1.23037552 | 0.72466565 | conserved  | conserved |
| E2F1     | 0.01047656 | 0.26590852 | conserved  | conserved |
| E2F2     | 0.01229917 | 0.02139823 | conserved  | conserved |
| E2F3     | 0.76050591 | 0.12804374 | conserved  | conserved |
| E2F6     | 0.14438488 | 0.23859987 | conserved  | conserved |
| E2F7     | 0.01059668 | 0.03307633 | conserved  | conserved |
| E2F8     | 0          | 0.02339003 | conserved  | conserved |
| E4F1     | 0.38589407 | 0.14609719 | conserved  | conserved |
| EAF1     | 0.08023331 | 0.07903715 | conserved  | conserved |

|          |            |            |            |                      |
|----------|------------|------------|------------|----------------------|
| EAF2     | 0.48691128 | 0.04259997 | conserved  | conserved            |
| EARS2    | 0.18168869 | 0.07818702 | conserved  | conserved            |
| EBAG9    | 0.34408918 | 0.29953468 | conserved  | conserved            |
| EBF1     | 0.11542477 | 0.00934013 | conserved  | conserved            |
| EBF2     | 0.01373696 | 0          | conserved  | conserved            |
| EBF3     | 0.01168218 | 0          | conserved  | conserved            |
| EBF4     | 0.28903234 | 0.03844011 | conserved  | conserved            |
| EBNA1BP2 | 0.09685662 | 1.22818919 | mouse-RGL  | conserved            |
| ECD      | 0.41143276 | 0.25857275 | conserved  | conserved            |
| ECE1     | 1.69274792 | 0.015808   | conserved  | conserved            |
| ECEL1    | 0.00305203 | 0.00594497 | conserved  | conserved            |
| ECHDC1   | 0.86831148 | 0.51635796 | conserved  | conserved            |
| ECHDC2   | 0.32819765 | 0.4716099  | conserved  | conserved            |
| ECHDC3   | 0.70563635 | 0.01767359 | conserved  | conserved            |
| ECHS1    | 0.37472049 | 1.1298885  | conserved  | conserved            |
| ECI1     | 0.49695953 | 0.80307123 | conserved  | conserved            |
| ECM1     | 0.05434119 | 0.00230266 | conserved  | conserved            |
| ECSIT    | 0.89662945 | 0.34021011 | conserved  | conserved            |
| ECT2     | 0.07942143 | 0.01429507 | conserved  | conserved            |
| EDA      | 0.8145467  | 0.03877123 | conserved  | conserved            |
| EDA2R    | 0.00365866 | 0.02531626 | conserved  | conserved            |
| EDAR     | 0.07810283 | 0.01726733 | conserved  | conserved            |
| EDARADD  | 0.06785488 | 0          | conserved  | conserved            |
| EDC3     | 0.34920046 | 0.13650216 | conserved  | conserved            |
| EDC4     | 0.2330762  | 0.15702992 | conserved  | conserved            |
| EDEM2    | 0.19056039 | 0.23058939 | conserved  | conserved            |
| EDEM3    | 1.20508934 | 0.165374   | conserved  | conserved            |
| EDIL3    | 3.66214069 | 0.07411632 | monkey-NSC | monkey-NSC1-enriched |
| EDN2     | 0          | 0          | conserved  | conserved            |
| EDN3     | 0.00330909 | 0          | conserved  | conserved            |
| EDNRA    | 0.00868097 | 0.01386217 | conserved  | conserved            |
| EDNRB    | 2.02995751 | 1.12135906 | monkey-NSC | conserved            |
| EDRF1    | 0.518591   | 0.07090167 | conserved  | conserved            |
| EEA1     | 1.7879129  | 0.34622785 | conserved  | conserved            |
| EED      | 0.36863377 | 0.32444552 | conserved  | conserved            |
| EEF1A2   | 0.0266721  | 0.04191353 | conserved  | conserved            |
| EEF2K    | 2.94135489 | 0.35361623 | monkey-NSC | conserved            |
| EEFSEC   | 0.66662848 | 0.28647153 | conserved  | conserved            |
| EEPD1    | 2.14634359 | 0.59101222 | conserved  | conserved            |
| EFCAB1   | 0.00160546 | 0.29617484 | conserved  | conserved            |
| EFCAB10  | 0.02001107 | 0.02969352 | conserved  | conserved            |

|         |            |            |            |           |
|---------|------------|------------|------------|-----------|
| EFCAB11 | 0.29664928 | 0.01566189 | conserved  | conserved |
| EFCAB12 | 0.01453455 | 0.03975578 | conserved  | conserved |
| EFCAB3  | 0.01702888 | 0.00341122 | conserved  | conserved |
| EFCAB5  | 0.17286942 | 0.00880111 | conserved  | conserved |
| EFCAB6  | 0.56976369 | 0.00221154 | conserved  | conserved |
| EFCAB8  | 0.237742   | 0.00690205 | conserved  | conserved |
| EFCAB9  | 0.00784162 | 0          | conserved  | conserved |
| EFCC1   | 0.01606882 | 0.01657431 | conserved  | conserved |
| EFEMP1  | 3.59980552 | 0.02952337 | conserved  | conserved |
| EFEMP2  | 0.36432295 | 0.28530299 | conserved  | conserved |
| EFHB    | 0.11331373 | 0.01144429 | conserved  | conserved |
| EFHC1   | 0.32144407 | 0.00660463 | conserved  | conserved |
| EFHC2   | 0.67194007 | 0.00310921 | conserved  | conserved |
| EFHD1   | 0.31132178 | 0.17749923 | conserved  | conserved |
| EFNA3   | 0.02535862 | 0.03842017 | conserved  | conserved |
| EFNA5   | 4.0835231  | 0.15475108 | conserved  | conserved |
| EFNB1   | 0.08159506 | 0.67857639 | conserved  | conserved |
| EFNB2   | 0.15059059 | 0.16912368 | conserved  | conserved |
| EFNB3   | 0.09519563 | 0.54125842 | conserved  | conserved |
| EFR3A   | 2.2290705  | 0.55198682 | conserved  | conserved |
| EFR3B   | 5.76101377 | 0.12270172 | monkey-NSC | conserved |
| EFS     | 0.60073111 | 0.3043174  | conserved  | conserved |
| EFTUD2  | 0.82527193 | 0.77442006 | conserved  | conserved |
| EGF     | 0.02338879 | 0.03396629 | conserved  | conserved |
| EGFL6   | 0.01861641 | 0.00988197 | conserved  | conserved |
| EGFL7   | 0.02486653 | 0.08409423 | conserved  | conserved |
| EGFLAM  | 0.04076996 | 0.00268789 | conserved  | conserved |
| EGFR    | 2.81180148 | 0.47447022 | monkey-NSC | conserved |
| EGLN3   | 0.37026575 | 0.29021246 | conserved  | conserved |
| EGR1    | 0.03683676 | 3.62268321 | conserved  | conserved |
| EGR2    | 0.00225104 | 0.05742868 | conserved  | conserved |
| EHBP1   | 3.99448273 | 0.89205555 | conserved  | conserved |
| EHD1    | 0.16167814 | 0.31677552 | conserved  | conserved |
| EHD2    | 0.25865378 | 0.05963219 | conserved  | conserved |
| EHD3    | 0.07691666 | 0.10459411 | conserved  | conserved |
| EHD4    | 0.06753146 | 0.02041088 | conserved  | conserved |
| EHF     | 0.00834532 | 0          | conserved  | conserved |
| EHHADH  | 0.23358801 | 0.01579081 | conserved  | conserved |
| EHMT1   | 4.04855949 | 0.56320858 | monkey-NSC | conserved |
| EHMT2   | 0.26201077 | 0.49440507 | conserved  | conserved |
| EI24    | 0.22051237 | 1.87675253 | conserved  | conserved |



|           |            |            |           |           |
|-----------|------------|------------|-----------|-----------|
| EID2      | 0.00920252 | 0.07266943 | conserved | conserved |
| EIF1AD    | 0.02617023 | 0.41466475 | conserved | conserved |
| EIF1B     | 0.32537958 | 4.38301115 | mouse-RGL | conserved |
| EIF2A     | 0.42374072 | 0.79711003 | conserved | conserved |
| EIF2AK1   | 0.33684007 | 0.19951768 | conserved | conserved |
| EIF2AK2   | 0.74328804 | 0.1725655  | conserved | conserved |
| EIF2AK3   | 0.43741051 | 0.07311408 | conserved | conserved |
| EIF2AK4   | 0.67861566 | 0.13833524 | conserved | conserved |
| EIF2B1    | 0.32091079 | 0.24200175 | conserved | conserved |
| EIF2B2    | 0.14018508 | 0.31790244 | conserved | conserved |
| EIF2B4    | 0.17226962 | 0.30354165 | conserved | conserved |
| EIF2B5    | 0.78107752 | 0.25056294 | conserved | conserved |
| EIF2D     | 0.23544249 | 0.23634565 | conserved | conserved |
| EIF2S1    | 0.31564683 | 0.76345979 | conserved | conserved |
| EIF2S2    | 0.38465418 | 3.61785789 | mouse-RGL | conserved |
| EIF3A     | 0.91105721 | 1.11624613 | conserved | conserved |
| EIF3B     | 0.31817558 | 0.52850939 | conserved | conserved |
| EIF3D     | 0.21731771 | 0.69085549 | conserved | conserved |
| EIF3E     | 0.53912515 | 3.41670232 | mouse-RGL | conserved |
| EIF3F     | 0.11901373 | 5.94314568 | mouse-RGL | conserved |
| EIF3G     | 0.01609762 | 1.23778883 | conserved | conserved |
| EIF3H     | 0.69552266 | 3.84267043 | mouse-RGL | conserved |
| EIF3K     | 0.31232229 | 2.92033389 | mouse-RGL | conserved |
| EIF3L     | 0.38957509 | 0.66221117 | conserved | conserved |
| EIF3M     | 0.40423787 | 1.19077952 | mouse-RGL | conserved |
| EIF4A2    | 0.95527251 | 2.28957747 | conserved | conserved |
| EIF4E     | 0.4448277  | 1.41259317 | conserved | conserved |
| EIF4EBP1  | 0.08402541 | 0.38204192 | conserved | conserved |
| EIF4ENIF1 | 0.48244992 | 0.21624639 | conserved | conserved |
| EIF4G1    | 0.27430519 | 0.93465657 | conserved | conserved |
| EIF4G2    | 0.58503793 | 5.24219559 | conserved | conserved |
| EIF4G3    | 7.68820702 | 0.84797743 | conserved | conserved |
| EIF5      | 0.60207383 | 2.65770764 | conserved | conserved |
| EIF5B     | 0.73772102 | 1.91179822 | mouse-RGL | conserved |
| ELAC1     | 0.13119746 | 0.03698814 | conserved | conserved |
| ELAC2     | 0.06796889 | 0.14364441 | conserved | conserved |
| ELAVL1    | 0.47239179 | 1.81940756 | mouse-RGL | conserved |
| ELAVL2    | 0.33417877 | 0.65823499 | conserved | conserved |
| ELAVL3    | 1.41595093 | 0.42340091 | conserved | conserved |
| ELAVL4    | 0.28479195 | 0.3020887  | conserved | conserved |
| ELF1      | 0.86947457 | 0.13245039 | conserved | conserved |

|         |            |            |            |           |
|---------|------------|------------|------------|-----------|
| ELF2    | 1.55881076 | 0.73612101 | conserved  | conserved |
| ELF3    | 0.00353253 | 0.01150423 | conserved  | conserved |
| ELF4    | 0.0175239  | 0          | conserved  | conserved |
| ELF5    | 0.0034228  | 0.00476161 | conserved  | conserved |
| ELFN2   | 0.04350094 | 0.01987931 | conserved  | conserved |
| ELK3    | 0.09586984 | 0.14925805 | conserved  | conserved |
| ELK4    | 0.04380195 | 0.18616384 | conserved  | conserved |
| ELL     | 0.21277693 | 0.08003121 | conserved  | conserved |
| ELL3    | 0.00655277 | 0          | conserved  | conserved |
| ELMO1   | 1.27266098 | 0.08882647 | monkey-NSC | conserved |
| ELMO2   | 0.72266353 | 0.19041196 | conserved  | conserved |
| ELMO3   | 0.00443208 | 0.01299428 | conserved  | conserved |
| ELMOD1  | 1.0960181  | 0.07293817 | conserved  | conserved |
| ELMOD3  | 1.76303686 | 0.30598176 | conserved  | conserved |
| ELOF1   | 0.0487116  | 1.73900026 | conserved  | conserved |
| ELOVL2  | 1.48243637 | 0.12120859 | monkey-NSC | conserved |
| ELOVL3  | 0.00154944 | 0          | conserved  | conserved |
| ELOVL4  | 0.13197686 | 0.15521541 | conserved  | conserved |
| ELOVL6  | 0.85327075 | 0.58797131 | conserved  | conserved |
| ELOVL7  | 0.0641471  | 0.00417321 | conserved  | conserved |
| ELP2    | 0.6697813  | 0.2024251  | conserved  | conserved |
| ELP3    | 0.42649175 | 0.26746709 | conserved  | conserved |
| ELP5    | 0.09133009 | 0.70119613 | conserved  | conserved |
| ELP6    | 0.37815103 | 0.21969165 | conserved  | conserved |
| EMB     | 0.26807283 | 0.05580301 | conserved  | conserved |
| EMC1    | 0.16136066 | 0.39838653 | conserved  | conserved |
| EMC10   | 0.07972825 | 1.88082892 | mouse-RGL  | conserved |
| EMC2    | 0.69592183 | 0.79112809 | conserved  | conserved |
| EMC3    | 0.26974075 | 0.8476359  | conserved  | conserved |
| EMC4    | 0.0301605  | 0.78543998 | conserved  | conserved |
| EMC6    | 0.0396429  | 1.79866724 | mouse-RGL  | conserved |
| EMC7    | 0.20065757 | 1.17422999 | conserved  | conserved |
| EMC8    | 0.17292499 | 1.22905231 | conserved  | conserved |
| EMC9    | 0.0381048  | 0.18424844 | conserved  | conserved |
| EMCN    | 0.0505627  | 0.00420598 | conserved  | conserved |
| EMD     | 0.07926452 | 0.63604555 | conserved  | conserved |
| EME1    | 0.01811063 | 0.00690403 | conserved  | conserved |
| EMG1    | 0.05994589 | 1.96787105 | mouse-RGL  | conserved |
| EMID1   | 1.47275201 | 1.74023946 | conserved  | conserved |
| EMILIN1 | 0.01019752 | 0.01739584 | conserved  | conserved |
| EMILIN2 | 0.02323507 | 0          | conserved  | conserved |

|          |            |            |            |           |
|----------|------------|------------|------------|-----------|
| EML1     | 0.81611798 | 0.12574864 | conserved  | conserved |
| EML3     | 0.05427825 | 0.09377692 | conserved  | conserved |
| EML4     | 1.17553898 | 0.34636646 | conserved  | conserved |
| EML5     | 1.53057225 | 0.3075625  | conserved  | conserved |
| EML6     | 1.88412591 | 0.03871061 | monkey-NSC | conserved |
| EMP3     | 0.05002413 | 0.02287175 | conserved  | conserved |
| EMSY     | 0.79205424 | 0.55687023 | conserved  | conserved |
| EMX2     | 0.35175757 | 1.68600856 | mouse-RGL  | conserved |
| ENAH     | 1.47627557 | 1.09948861 | conserved  | conserved |
| ENC1     | 0.29844004 | 0.22965067 | conserved  | conserved |
| ENDOD1   | 0.13385891 | 0.08968014 | conserved  | conserved |
| ENDOU    | 0.82809177 | 0.00387971 | monkey-NSC | conserved |
| ENG      | 0.03581928 | 0.01212146 | conserved  | conserved |
| ENGASE   | 0.08188097 | 0.0556612  | conserved  | conserved |
| ENKD1    | 0.05394669 | 0.19993841 | conserved  | conserved |
| ENO2     | 0.25036924 | 0.14280254 | conserved  | conserved |
| ENO4     | 0.21821443 | 0.00739598 | conserved  | conserved |
| ENOX1    | 0.60262375 | 0.07001828 | conserved  | conserved |
| ENOX2    | 0.25538318 | 0.05065609 | conserved  | conserved |
| ENPEP    | 0.03879865 | 0          | conserved  | conserved |
| ENPP1    | 0.04148666 | 0          | conserved  | conserved |
| ENPP2    | 0.31157891 | 0.34171894 | conserved  | conserved |
| ENPP3    | 0.01171644 | 0          | conserved  | conserved |
| ENPP4    | 0.05458266 | 0.14484049 | conserved  | conserved |
| ENPP6    | 0.02155764 | 0          | conserved  | conserved |
| ENTHD1   | 0.01090663 | 0          | conserved  | conserved |
| ENTPD2   | 0.18846339 | 1.21570187 | conserved  | conserved |
| ENTPD3   | 0.14680523 | 0          | conserved  | conserved |
| ENTPD7   | 0.12896465 | 0.04649327 | conserved  | conserved |
| ENTPD8   | 0.00399031 | 0          | conserved  | conserved |
| EOGT     | 0.21444908 | 0.06259933 | conserved  | conserved |
| EP300    | 2.2975696  | 0.20515645 | monkey-NSC | conserved |
| EPAS1    | 0.56027415 | 0.11555966 | conserved  | conserved |
| EPB41    | 0.93190128 | 0.14371512 | conserved  | conserved |
| EPB41L1  | 0.60042066 | 0.14492013 | conserved  | conserved |
| EPB41L2  | 3.8553966  | 0.1543703  | monkey-NSC | conserved |
| EPB41L3  | 0.42916757 | 0.10260676 | conserved  | conserved |
| EPB41L4A | 0.39769264 | 0.07370071 | conserved  | conserved |
| EPB41L4B | 0.23427547 | 0.08579968 | conserved  | conserved |
| EPB41L5  | 1.32503424 | 0.32125738 | conserved  | conserved |
| EPB42    | 0          | 0          | conserved  | conserved |

|          |            |            |            |           |
|----------|------------|------------|------------|-----------|
| EPC1     | 2.99946374 | 0.4385784  | conserved  | conserved |
| EPC2     | 1.54736385 | 0.22242269 | conserved  | conserved |
| EPCAM    | 0.00430206 | 0.01257972 | conserved  | conserved |
| EPG5     | 0.76544087 | 0.07467009 | conserved  | conserved |
| EPGN     | 0.0120592  | 0.00311977 | conserved  | conserved |
| EPHA2    | 0.00458388 | 0          | conserved  | conserved |
| EPHA3    | 0.31780636 | 0.08327834 | conserved  | conserved |
| EPHA4    | 1.71396712 | 1.25894571 | conserved  | conserved |
| EPHA5    | 1.82636281 | 0.95667739 | conserved  | conserved |
| EPHA6    | 9.03302942 | 0.00407658 | monkey-NSC | conserved |
| EPHA7    | 1.69736225 | 0.33625574 | conserved  | conserved |
| EPHA8    | 0.00223956 | 0.00356348 | conserved  | conserved |
| EPHB1    | 9.39107647 | 1.20970378 | conserved  | conserved |
| EPHB3    | 0.05459025 | 0.2728371  | conserved  | conserved |
| EPHB4    | 0.06442428 | 0.09169495 | conserved  | conserved |
| EPHB6    | 0.06694569 | 0.0432595  | conserved  | conserved |
| EPHX2    | 0.74484493 | 0.10685297 | conserved  | conserved |
| EPHX3    | 0.02266608 | 0.00178496 | conserved  | conserved |
| EPM2AIP1 | 0.07284296 | 0.64727046 | conserved  | conserved |
| EPN2     | 2.160763   | 0.51249333 | conserved  | conserved |
| EPN3     | 0.00259499 | 0.00337361 | conserved  | conserved |
| EPO      | 0          | 0          | conserved  | conserved |
| EPOR     | 0.01950151 | 0.00902999 | conserved  | conserved |
| EPS15    | 1.93601211 | 1.04290342 | monkey-NSC | conserved |
| EPS15L1  | 2.80227951 | 0.09626472 | conserved  | conserved |
| EPS8     | 2.08638378 | 0.43847008 | monkey-NSC | conserved |
| EPS8L2   | 0.04222746 | 0.00875779 | conserved  | conserved |
| EPS8L3   | 0          | 0          | conserved  | conserved |
| EPSTI1   | 0.064147   | 0          | conserved  | conserved |
| EPX      | 0          | 0          | conserved  | conserved |
| EPYC     | 0.00666791 | 0          | conserved  | conserved |
| EQTN     | 0.02690048 | 0          | conserved  | conserved |
| ERAL1    | 0.17137397 | 0.0622655  | conserved  | conserved |
| ERAP1    | 0.10863854 | 0.01755956 | conserved  | conserved |
| ERAS     | 0.00103794 | 0          | conserved  | conserved |
| ERBB2    | 0.27260588 | 0.06089761 | conserved  | conserved |
| ERBB4    | 26.6079192 | 0.03507942 | monkey-NSC | conserved |
| ERC1     | 4.22085781 | 0.25766734 | monkey-NSC | conserved |
| ERC2     | 5.32664116 | 0.17956614 | monkey-NSC | conserved |
| ERCC1    | 0.15068432 | 0.46938063 | conserved  | conserved |
| ERCC2    | 0.1297659  | 0.0634652  | conserved  | conserved |

|         |            |            |            |           |
|---------|------------|------------|------------|-----------|
| ERCC4   | 0.27164886 | 0.06896591 | conserved  | conserved |
| ERCC6   | 0.56595984 | 0.06726852 | conserved  | conserved |
| ERCC6L  | 0.05193787 | 0.00810792 | conserved  | conserved |
| ERCC8   | 0.47236951 | 0.1415649  | conserved  | conserved |
| EREG    | 0.0050167  | 0          | conserved  | conserved |
| ERG     | 0.04422692 | 0.00286524 | conserved  | conserved |
| ERGIC1  | 0.55734214 | 0.61502047 | conserved  | conserved |
| ERGIC2  | 0.50261177 | 0.86244909 | conserved  | conserved |
| ERGIC3  | 0.28679108 | 1.36921823 | conserved  | conserved |
| ERH     | 0.23856816 | 9.81167688 | mouse-RGL  | conserved |
| ERI1    | 0.13622752 | 0.25670976 | conserved  | conserved |
| ERI2    | 0.2560287  | 0.12011744 | conserved  | conserved |
| ERI3    | 3.72151536 | 1.09557147 | conserved  | conserved |
| ERICH1  | 0.47412314 | 0.16881116 | conserved  | conserved |
| ERICH6  | 0.03069951 | 0          | conserved  | conserved |
| ERICH6B | 0.00706088 | 0          | conserved  | conserved |
| ERLEC1  | 1.19621735 | 0.40207825 | conserved  | conserved |
| ERLIN1  | 0.10412365 | 0.11947856 | conserved  | conserved |
| ERLIN2  | 0.1357498  | 0.25910483 | conserved  | conserved |
| ERMAP   | 0.09917953 | 0          | conserved  | conserved |
| ERMN    | 0.07097979 | 0.01452549 | conserved  | conserved |
| ERMP1   | 0.24114947 | 0.11361384 | conserved  | conserved |
| ERN1    | 0.20019339 | 0.04279427 | conserved  | conserved |
| ERN2    | 0.00800036 | 0          | conserved  | conserved |
| ERP27   | 0.00508327 | 0          | conserved  | conserved |
| ERP44   | 1.03280943 | 0.41557281 | conserved  | conserved |
| ERRFI1  | 0.21671177 | 0.08180541 | conserved  | conserved |
| ESAM    | 0.01661143 | 0.01380534 | conserved  | conserved |
| ESCO1   | 0.89881277 | 0.11845134 | conserved  | conserved |
| ESCO2   | 0.00107531 | 0.01364966 | conserved  | conserved |
| ESM1    | 0          | 0          | conserved  | conserved |
| ESPL1   | 0.0374909  | 0.00335512 | conserved  | conserved |
| ESR1    | 0.15310265 | 0.00539996 | conserved  | conserved |
| ESR2    | 0.09097864 | 0          | conserved  | conserved |
| ESRP1   | 0.03564689 | 0.004023   | conserved  | conserved |
| ESRP2   | 0.00104563 | 0          | conserved  | conserved |
| ESRRA   | 0.19715127 | 0.11841992 | conserved  | conserved |
| ESRRB   | 0.01213566 | 0          | conserved  | conserved |
| ESRRG   | 1.46391744 | 0.00280827 | monkey-NSC | conserved |
| ESYT2   | 0.73021096 | 0.14632589 | conserved  | conserved |
| ESYT3   | 0.16029571 | 0.03079468 | conserved  | conserved |

|         |            |            |            |                      |
|---------|------------|------------|------------|----------------------|
| ETFA    | 0.79408104 | 1.17704324 | conserved  | conserved            |
| ETFDH   | 0.52089001 | 0.32254337 | conserved  | conserved            |
| ETNK1   | 0.54405487 | 0.64186755 | conserved  | conserved            |
| ETNK2   | 0.06148433 | 0.02178398 | conserved  | conserved            |
| ETNPPL  | 6.4910469  | 0          | monkey-NSC | monkey-NSC1-enriched |
| ETS1    | 0.05061242 | 0          | conserved  | conserved            |
| ETS2    | 0.07155187 | 0.07985755 | conserved  | conserved            |
| ETV1    | 0.78461959 | 0.26064911 | conserved  | conserved            |
| ETV2    | 0.0062004  | 0          | conserved  | conserved            |
| ETV3    | 0.11619554 | 0.09969396 | conserved  | conserved            |
| ETV4    | 0.16489743 | 0.70865241 | conserved  | conserved            |
| ETV5    | 0.52719563 | 0.43660185 | conserved  | conserved            |
| ETV6    | 1.30347845 | 0.07899018 | conserved  | conserved            |
| EVA1A   | 0.11278916 | 0.32302289 | conserved  | conserved            |
| EVA1B   | 0.01476529 | 0.08883204 | conserved  | conserved            |
| EVC     | 0.43394092 | 0.16247439 | conserved  | conserved            |
| EVC2    | 0.50541568 | 0.05976346 | conserved  | conserved            |
| EVI5    | 2.25097904 | 2.03116135 | conserved  | conserved            |
| EVI5L   | 0.18626166 | 0.17526225 | conserved  | conserved            |
| EVL     | 1.40360324 | 0.76153344 | conserved  | conserved            |
| EVPL    | 0.00456251 | 0          | conserved  | conserved            |
| EWSR1   | 1.36331001 | 1.91745908 | conserved  | conserved            |
| EXD1    | 0.0753232  | 0.00571885 | conserved  | conserved            |
| EXD2    | 0.2869707  | 0.15790519 | conserved  | conserved            |
| EXO1    | 0.01611415 | 0.03494603 | conserved  | conserved            |
| EXO5    | 0.01899963 | 0.11296973 | conserved  | conserved            |
| EXOC1   | 1.51891778 | 0.22214843 | conserved  | conserved            |
| EXOC2   | 1.96204762 | 0.10936777 | conserved  | conserved            |
| EXOC3   | 0.24697036 | 0.37204082 | conserved  | conserved            |
| EXOC3L4 | 0.0033277  | 0.00841196 | conserved  | conserved            |
| EXOC5   | 0.67331506 | 0.39584907 | conserved  | conserved            |
| EXOC6   | 0.98387705 | 0.0126364  | conserved  | conserved            |
| EXOC7   | 0.73684213 | 0.20811224 | conserved  | conserved            |
| EXOC8   | 0.0260909  | 0.2943935  | conserved  | conserved            |
| EXOG    | 0.49781118 | 0.10766654 | conserved  | conserved            |
| EXOSC10 | 0.25545772 | 0.22207956 | conserved  | conserved            |
| EXOSC3  | 0.38866531 | 0.22402297 | conserved  | conserved            |
| EXOSC5  | 0.05454462 | 0.68910076 | conserved  | conserved            |
| EXOSC7  | 0.28222722 | 0.46847603 | conserved  | conserved            |
| EXOSC8  | 0.09608281 | 0.31326987 | conserved  | conserved            |
| EXOSC9  | 0.07589567 | 0.13003136 | conserved  | conserved            |

|         |            |            |            |                      |
|---------|------------|------------|------------|----------------------|
| EXPH5   | 0.08360519 | 0          | conserved  | conserved            |
| EXT1    | 7.50883229 | 0.20484082 | monkey-NSC | conserved            |
| EXT2    | 0.86405241 | 0.45101564 | conserved  | conserved            |
| EXTL2   | 0.29855028 | 0.32159831 | conserved  | conserved            |
| EXTL3   | 0.60158888 | 0.16635026 | conserved  | conserved            |
| EYA1    | 1.14303392 | 0.45809566 | conserved  | conserved            |
| EYA2    | 1.9466823  | 0.01132076 | monkey-NSC | monkey-NSC1-enriched |
| EYA3    | 1.04805144 | 0.04182181 | conserved  | conserved            |
| EYA4    | 0.1351225  | 0.01170998 | conserved  | conserved            |
| EZH1    | 0.66987578 | 0.09135685 | conserved  | conserved            |
| EZH2    | 0.05841806 | 0.96093995 | mouse-RGL  | conserved            |
| EZR     | 1.18812481 | 1.49135552 | conserved  | conserved            |
| F10     | 0.11634588 | 0          | conserved  | conserved            |
| F11     | 0          | 0.0066255  | conserved  | conserved            |
| F11R    | 0.02309937 | 0.0067783  | conserved  | conserved            |
| F12     | 0.00939685 | 0          | conserved  | conserved            |
| F13A1   | 0.10016495 | 0.00405856 | conserved  | conserved            |
| F13B    | 0.00104037 | 0          | conserved  | conserved            |
| F2      | 0.02551125 | 0.02328872 | conserved  | conserved            |
| F2R     | 0.01491483 | 0.34958124 | conserved  | conserved            |
| F2RL2   | 0.00271163 | 0          | conserved  | conserved            |
| F5      | 0.01189487 | 0.00487407 | conserved  | conserved            |
| F7      | 0.00497068 | 0          | conserved  | conserved            |
| F8      | 0.38958861 | 0.01835478 | conserved  | conserved            |
| F9      | 0.00077761 | 0          | conserved  | conserved            |
| FRMPD2  | 0.09062959 | 0          | conserved  | conserved            |
| FA2H    | 0.15783402 | 0          | conserved  | conserved            |
| FAAP100 | 0.12479411 | 0.236721   | conserved  | conserved            |
| FABP1   | 0.03098944 | 0          | conserved  | conserved            |
| FABP12  | 0.00293354 | 0          | conserved  | conserved            |
| FABP3   | 0.06973694 | 0.08723749 | conserved  | conserved            |
| FABP4   | 0.0036997  | 0          | conserved  | conserved            |
| FABP6   | 0.0027649  | 0          | conserved  | conserved            |
| FADS1   | 2.26742655 | 1.25375207 | monkey-NSC | conserved            |
| FADS2   | 4.50352133 | 0.25964429 | monkey-NSC | conserved            |
| FADS3   | 0.50456788 | 0.04014076 | conserved  | conserved            |
| FAF1    | 4.47705734 | 0.20590419 | conserved  | conserved            |
| FAF2    | 0.89652966 | 0.34158308 | conserved  | conserved            |
| FAHD1   | 0.0451853  | 0.39533413 | conserved  | conserved            |
| FAIM2   | 1.4821371  | 0.07286835 | conserved  | conserved            |
| FAM102B | 0.26495957 | 0.11067702 | conserved  | conserved            |

|          |            |            |            |           |
|----------|------------|------------|------------|-----------|
| FAM107A  | 3.3540933  | 0.79579233 | monkey-NSC | conserved |
| FAM107B  | 0.18486328 | 0.20916542 | conserved  | conserved |
| FAM110A  | 0.00344332 | 0.06657264 | conserved  | conserved |
| FAM110B  | 0.0007358  | 0.46766589 | conserved  | conserved |
| FAM114A1 | 0.11275413 | 0.08354071 | conserved  | conserved |
| FAM114A2 | 0.2412007  | 0.5337104  | conserved  | conserved |
| FAM117B  | 0.67719347 | 0.18357792 | conserved  | conserved |
| FAM118A  | 0.19496981 | 0.15982199 | conserved  | conserved |
| FAM118B  | 0.30494405 | 0.27615242 | conserved  | conserved |
| FAM120A  | 2.74301059 | 0.90430282 | conserved  | conserved |
| FAM120B  | 1.66180562 | 0.17127411 | conserved  | conserved |
| FAM120C  | 0.63378683 | 0.03221424 | conserved  | conserved |
| FAM124A  | 0.252208   | 0.30793106 | conserved  | conserved |
| FAM124B  | 0.00251339 | 0          | conserved  | conserved |
| FAM126A  | 0.31891437 | 0.35678545 | conserved  | conserved |
| FAM126B  | 1.11693894 | 0.27338474 | conserved  | conserved |
| FAM131A  | 0.091808   | 0.16834638 | conserved  | conserved |
| FAM131B  | 0.04468093 | 0.02815385 | conserved  | conserved |
| FAM135A  | 2.04898685 | 0.2866464  | conserved  | conserved |
| FAM135B  | 1.04204256 | 0          | conserved  | conserved |
| FAM13A   | 3.23994963 | 0.10889338 | conserved  | conserved |
| FAM13B   | 1.04483418 | 0.0618307  | conserved  | conserved |
| FAM13C   | 0.5852952  | 0.47803927 | conserved  | conserved |
| FAM149A  | 0.15750957 | 0.20503297 | conserved  | conserved |
| FAM151A  | 0.25045321 | 0          | conserved  | conserved |
| FAM151B  | 0.25061025 | 0.0029555  | conserved  | conserved |
| FAM155A  | 8.60808836 | 0.04622559 | conserved  | conserved |
| FAM160A1 | 0.01926949 | 0          | conserved  | conserved |
| FAM160B1 | 0.46107772 | 0.15174311 | conserved  | conserved |
| FAM160B2 | 0.16011523 | 0.13514011 | conserved  | conserved |
| FAM161A  | 0.26248422 | 0.02488226 | conserved  | conserved |
| FAM162A  | 0.3454573  | 1.71033686 | mouse-RGL  | conserved |
| FAM163A  | 0.00783212 | 0.04599276 | conserved  | conserved |
| FAM163B  | 0.07780229 | 0.06075148 | conserved  | conserved |
| FAM166B  | 0.00855471 | 0.01510819 | conserved  | conserved |
| FAM167A  | 0.07801772 | 0.44601526 | conserved  | conserved |
| FAM167B  | 0.00128903 | 0          | conserved  | conserved |
| FAM168A  | 1.17066153 | 1.0767147  | conserved  | conserved |
| FAM169A  | 0.78740116 | 0.02792693 | conserved  | conserved |
| FAM171A1 | 4.1983353  | 0.10393502 | monkey-NSC | conserved |
| FAM171B  | 3.88715092 | 1.41182956 | conserved  | conserved |



|          |            |            |            |           |
|----------|------------|------------|------------|-----------|
| FAM172A  | 4.13471616 | 0.93759831 | conserved  | conserved |
| FAM174A  | 0.1878496  | 1.20873039 | conserved  | conserved |
| FAM178B  | 0.07384749 | 0          | conserved  | conserved |
| FAM181A  | 0.002997   | 0.25334675 | conserved  | conserved |
| FAM184A  | 2.64462851 | 0.15802524 | monkey-NSC | conserved |
| FAM184B  | 0.5587348  | 0.07310498 | conserved  | conserved |
| FAM185A  | 0.58375442 | 0.07645255 | conserved  | conserved |
| FAM186B  | 0.00802286 | 0          | conserved  | conserved |
| FAM187B  | 0.00338064 | 0.00772837 | conserved  | conserved |
| FAM189A1 | 0.72962284 | 0.01533031 | conserved  | conserved |
| FAM189A2 | 1.99132622 | 0.10411941 | monkey-NSC | conserved |
| FAM193A  | 2.09343718 | 0.41805615 | conserved  | conserved |
| FAM199X  | 0.54764858 | 0.15556746 | conserved  | conserved |
| FAM204A  | 0.49867586 | 1.32869196 | conserved  | conserved |
| FAM205C  | 0.00236974 | 0          | conserved  | conserved |
| FAM207A  | 0.46798473 | 0.23846113 | conserved  | conserved |
| FAM20B   | 0.20336642 | 0.14804428 | conserved  | conserved |
| FAM210B  | 0.12143459 | 2.38635176 | mouse-RGL  | conserved |
| FAM214A  | 1.82322937 | 0.19110959 | conserved  | conserved |
| FAM214B  | 0.16995776 | 0.21756205 | conserved  | conserved |
| FAM216A  | 0.19908647 | 0.81622253 | conserved  | conserved |
| FAM216B  | 0.00281747 | 0.01326158 | conserved  | conserved |
| FAM217A  | 0.01964404 | 0.00396712 | conserved  | conserved |
| FAM217B  | 0.04680179 | 0.04011629 | conserved  | conserved |
| FAM219A  | 0.97911887 | 0.11211487 | conserved  | conserved |
| FAM221B  | 0.03250005 | 0.00305138 | conserved  | conserved |
| FAM222B  | 1.83189423 | 0.23119691 | conserved  | conserved |
| FAM227A  | 0.15932371 | 0.06412148 | conserved  | conserved |
| FAM227B  | 0.93906887 | 0          | conserved  | conserved |
| FAM228A  | 0.14396227 | 0.01298255 | conserved  | conserved |
| FAM234B  | 0.04192234 | 0.24826187 | conserved  | conserved |
| FAM32A   | 0.07972388 | 2.20150884 | conserved  | conserved |
| FAM3A    | 0.24803893 | 0.31402464 | conserved  | conserved |
| FAM3C    | 0.37378653 | 1.33743373 | conserved  | conserved |
| FAM50A   | 0.09026255 | 0.35008766 | conserved  | conserved |
| FAM53A   | 0.12849842 | 0.43346979 | conserved  | conserved |
| FAM53B   | 0.4261005  | 0.40230315 | conserved  | conserved |
| FAM53C   | 0.32038539 | 0.27975743 | conserved  | conserved |
| FAM71B   | 0.00121969 | 0          | conserved  | conserved |
| FAM71D   | 0.03779376 | 0.00206283 | conserved  | conserved |
| FAM71F1  | 0.00048899 | 0          | conserved  | conserved |

|          |            |            |            |           |
|----------|------------|------------|------------|-----------|
| FAM76A   | 0.34111124 | 0.51423415 | conserved  | conserved |
| FAM76B   | 0.2782448  | 0.2850937  | conserved  | conserved |
| FAM78A   | 0.01596292 | 0          | conserved  | conserved |
| FAM81A   | 0.69734727 | 0.06909291 | conserved  | conserved |
| FAM83C   | 0          | 0          | conserved  | conserved |
| FAM83F   | 0          | 0          | conserved  | conserved |
| FAM83G   | 0.00283467 | 0          | conserved  | conserved |
| FAM89A   | 0.48578167 | 0.02187918 | conserved  | conserved |
| FAM89B   | 0.05559483 | 0.04131198 | conserved  | conserved |
| FAM8A1   | 0.15538814 | 0.38544138 | conserved  | conserved |
| FAM98A   | 0.1499543  | 0.26351528 | conserved  | conserved |
| FAM98B   | 0.13400224 | 0.38061817 | conserved  | conserved |
| FAM98C   | 0.0237699  | 0.28616989 | conserved  | conserved |
| FAN1     | 0.61492102 | 0.03146333 | conserved  | conserved |
| FANCB    | 0.0109451  | 0.00280582 | conserved  | conserved |
| FANCC    | 3.96973074 | 0.05970155 | monkey-NSC | conserved |
| FANCD2OS | 0          | 0          | conserved  | conserved |
| FANCE    | 0.11653051 | 0.14744635 | conserved  | conserved |
| FANCI    | 0.13854521 | 0.00810238 | conserved  | conserved |
| FANCL    | 0.44179769 | 0.14300999 | conserved  | conserved |
| FANCM    | 1.0679746  | 0.05361451 | conserved  | conserved |
| FANK1    | 0.39338776 | 0.02889529 | conserved  | conserved |
| FAP      | 0.01129667 | 0          | conserved  | conserved |
| FAR1     | 0.94971772 | 0.3632434  | conserved  | conserved |
| FAR2     | 0.18236934 | 0          | conserved  | conserved |
| FARP1    | 9.3584961  | 0.32603997 | monkey-NSC | conserved |
| FARP2    | 1.06756984 | 0.20909235 | monkey-NSC | conserved |
| FARS2    | 4.88453645 | 1.07842813 | conserved  | conserved |
| FARSA    | 0.26992894 | 0.44330262 | conserved  | conserved |
| FARSB    | 0.28492279 | 0.31718884 | conserved  | conserved |
| FASTK    | 0.03960569 | 0.42422191 | conserved  | conserved |
| FASTKD2  | 0.42753261 | 0.10097576 | conserved  | conserved |
| FASTKD3  | 0.02924391 | 0.05728609 | conserved  | conserved |
| FAT1     | 0.95964568 | 0.51991618 | conserved  | conserved |
| FAT2     | 0.02000973 | 0.0155738  | conserved  | conserved |
| FAT4     | 0.67508838 | 0.1311083  | conserved  | conserved |
| FAXC     | 0.32996026 | 0.01281127 | conserved  | conserved |
| FBF1     | 0.30929136 | 0.17440014 | conserved  | conserved |
| FBL      | 0.05850927 | 1.18190685 | mouse-RGL  | conserved |
| FBLIM1   | 0.29108004 | 0          | conserved  | conserved |
| FBLL1    | 0.01152623 | 0.01240968 | conserved  | conserved |

|        |            |            |            |                      |
|--------|------------|------------|------------|----------------------|
| FBLN1  | 1.28331346 | 0.06299109 | conserved  | conserved            |
| FBLN2  | 0.03400196 | 0.73200413 | mouse-RGL  | conserved            |
| FBLN5  | 0.08348808 | 0.03120012 | conserved  | conserved            |
| FBN1   | 1.23290226 | 0.04777922 | conserved  | conserved            |
| FBN2   | 0.11238704 | 0.0062675  | conserved  | conserved            |
| FBRS   | 0.17310466 | 0.10780201 | conserved  | conserved            |
| FBXL12 | 0.09556859 | 0.15179152 | conserved  | conserved            |
| FBXL13 | 1.85196769 | 0.00896705 | conserved  | conserved            |
| FBXL14 | 0.26939588 | 0.10994407 | conserved  | conserved            |
| FBXL16 | 0.22100661 | 0.14272548 | conserved  | conserved            |
| FBXL17 | 7.09255869 | 0.10559836 | monkey-NSC | conserved            |
| FBXL19 | 0.29223876 | 0.14274983 | conserved  | conserved            |
| FBXL2  | 0.4020368  | 0.08163565 | conserved  | conserved            |
| FBXL20 | 2.60514801 | 0.15827451 | conserved  | conserved            |
| FBXL22 | 0.00279713 | 0.01571363 | conserved  | conserved            |
| FBXL3  | 0.48285833 | 0.4333657  | conserved  | conserved            |
| FBXL4  | 0.5885676  | 0.09710764 | conserved  | conserved            |
| FBXL5  | 1.88698823 | 0.54735832 | conserved  | conserved            |
| FBXL6  | 0.13116665 | 0.26338488 | conserved  | conserved            |
| FBXL7  | 12.1334933 | 0.00290605 | monkey-NSC | monkey-NSC1-enriched |
| FBXO10 | 0.86530896 | 0.05087758 | conserved  | conserved            |
| FBXO11 | 3.06196175 | 0.70891128 | conserved  | conserved            |
| FBXO15 | 0.10297457 | 0          | conserved  | conserved            |
| FBXO2  | 0.08350213 | 1.03393721 | conserved  | conserved            |
| FBXO21 | 1.39219495 | 0.42040616 | conserved  | conserved            |
| FBXO24 | 0.01457668 | 0.00602002 | conserved  | conserved            |
| FBXO25 | 0.36722675 | 0.18804369 | conserved  | conserved            |
| FBXO28 | 0.87452747 | 0.29971773 | conserved  | conserved            |
| FBXO3  | 0.51162481 | 0.58255162 | conserved  | conserved            |
| FBXO30 | 0.10356453 | 0.22009479 | conserved  | conserved            |
| FBXO31 | 0.38076007 | 0.20977754 | conserved  | conserved            |
| FBXO32 | 0.20920813 | 0.03592411 | conserved  | conserved            |
| FBXO34 | 0.61629241 | 0.10300881 | conserved  | conserved            |
| FBXO36 | 0.65203728 | 0.15085918 | conserved  | conserved            |
| FBXO38 | 0.60243026 | 0.13867923 | conserved  | conserved            |
| FBXO39 | 0.00354034 | 0          | conserved  | conserved            |
| FBXO40 | 0.02347154 | 0          | conserved  | conserved            |
| FBXO41 | 0.0919918  | 0.05566779 | conserved  | conserved            |
| FBXO42 | 1.47201557 | 0.07934549 | conserved  | conserved            |
| FBXO45 | 0.0762424  | 0.22683727 | conserved  | conserved            |
| FBXO46 | 0.14615893 | 0.08775312 | conserved  | conserved            |

|        |            |            |           |           |
|--------|------------|------------|-----------|-----------|
| FBXO47 | 0.03057095 | 0.00462521 | conserved | conserved |
| FBXO48 | 0.00401475 | 0          | conserved | conserved |
| FBXO5  | 0.02752748 | 0.10014366 | conserved | conserved |
| FBXO6  | 0.0272472  | 0.32208288 | conserved | conserved |
| FBXO7  | 0.60286008 | 0.09986092 | conserved | conserved |
| FBXO8  | 0.52484178 | 0.39414452 | conserved | conserved |
| FBXW11 | 2.50038329 | 0.334669   | conserved | conserved |
| FBXW2  | 0.35594939 | 0.90157059 | conserved | conserved |
| FBXW7  | 2.09008716 | 0.51489356 | conserved | conserved |
| FBXW8  | 0.98688475 | 0.30619622 | conserved | conserved |
| FCAMR  | 0.0042759  | 0          | conserved | conserved |
| FCER1A | 0          | 0          | conserved | conserved |
| FCER1G | 0.00367847 | 0.01211315 | conserved | conserved |
| FCHO1  | 0.10019663 | 0.12682764 | conserved | conserved |
| FCHO2  | 0.83889879 | 0.36470387 | conserved | conserved |
| FCHSD1 | 0.00380788 | 0.02568623 | conserved | conserved |
| FCHSD2 | 3.50102545 | 0.50658741 | conserved | conserved |
| FCMR   | 0.00101422 | 0          | conserved | conserved |
| FCRL1  | 0.00107568 | 0          | conserved | conserved |
| FCRL5  | 0          | 0          | conserved | conserved |
| FDFT1  | 0.62926216 | 0.8857744  | conserved | conserved |
| FECH   | 0.25380187 | 0.33042303 | conserved | conserved |
| FEM1B  | 0.30126    | 0.47614001 | conserved | conserved |
| FEM1C  | 0.38278077 | 0.2096301  | conserved | conserved |
| FEN1   | 0.00217063 | 0.1996204  | conserved | conserved |
| FER    | 4.05615719 | 0.10711901 | conserved | conserved |
| FER1L6 | 0.00413605 | 0          | conserved | conserved |
| FERMT1 | 0.03430869 | 0          | conserved | conserved |
| FERMT2 | 3.50863814 | 0.8991468  | conserved | conserved |
| FERMT3 | 0.01839331 | 0.00607442 | conserved | conserved |
| FES    | 0.07761956 | 0.00273944 | conserved | conserved |
| FETUB  | 0          | 0          | conserved | conserved |
| FEZ1   | 1.03254412 | 5.58488776 | mouse-RGL | conserved |
| FEZ2   | 0.59899356 | 0.20157316 | conserved | conserved |
| FEZF1  | 0          | 0          | conserved | conserved |
| FEZF2  | 0.34498578 | 1.8952426  | mouse-RGL | conserved |
| FFAR1  | 0          | 0          | conserved | conserved |
| FFAR2  | 0          | 0          | conserved | conserved |
| FFAR4  | 0.02199385 | 0          | conserved | conserved |
| FGB    | 0          | 0          | conserved | conserved |
| FGD1   | 0.38086694 | 0.18309529 | conserved | conserved |

|          |            |            |            |                      |
|----------|------------|------------|------------|----------------------|
| FGD2     | 0.01645319 | 0.00359301 | conserved  | conserved            |
| FGD3     | 0.07367687 | 0.00338606 | conserved  | conserved            |
| FGD4     | 7.36975189 | 0.59546754 | monkey-NSC | conserved            |
| FGD5     | 0.02170974 | 0.01164433 | conserved  | conserved            |
| FGD6     | 3.88754079 | 0.23162841 | monkey-NSC | conserved            |
| FGF10    | 0.06183664 | 0.00620692 | conserved  | conserved            |
| FGF11    | 0.02932599 | 0.04868733 | conserved  | conserved            |
| FGF12    | 3.73416458 | 0.19517133 | conserved  | conserved            |
| FGF14    | 8.25339642 | 0.01864039 | monkey-NSC | conserved            |
| FGF16    | 0          | 0          | conserved  | conserved            |
| FGF18    | 0.00669633 | 0.00744509 | conserved  | conserved            |
| FGF2     | 1.17387882 | 0.21058663 | conserved  | conserved            |
| FGF21    | 0          | 0          | conserved  | conserved            |
| FGF7     | 0.09171086 | 0.00583624 | conserved  | conserved            |
| FGF8     | 0          | 0.01481766 | conserved  | conserved            |
| FGF9     | 0.04595408 | 0          | conserved  | conserved            |
| FGFR1    | 8.155618   | 1.55450942 | monkey-NSC | conserved            |
| FGFR1OP2 | 0.51622379 | 0.64391391 | conserved  | conserved            |
| FGFR2    | 5.99451842 | 0.43372356 | conserved  | conserved            |
| FGFR3    | 1.82838545 | 0.9654434  | monkey-NSC | conserved            |
| FGG      | 0          | 0          | conserved  | conserved            |
| FGGY     | 0.9119365  | 0.07200434 | conserved  | conserved            |
| FGL1     | 0.06255432 | 0          | conserved  | conserved            |
| FGL2     | 0.00316371 | 0.02970757 | conserved  | conserved            |
| FGR      | 0.01703941 | 0          | conserved  | conserved            |
| FHDC1    | 0.01051673 | 0.00623187 | conserved  | conserved            |
| FHIT     | 3.70764599 | 0.03064399 | monkey-NSC | monkey-NSC1-enriched |
| FHL1     | 0.6024892  | 0.54920795 | conserved  | conserved            |
| FHL3     | 0.05790173 | 0.00613153 | conserved  | conserved            |
| FHL5     | 0.00981169 | 0          | conserved  | conserved            |
| FHOD1    | 0.22787486 | 0.03482283 | conserved  | conserved            |
| FHOD3    | 1.64758433 | 0.03997195 | conserved  | conserved            |
| FIBCD1   | 0.02731698 | 0.01906364 | conserved  | conserved            |
| FIBP     | 0.01164324 | 0.54502663 | conserved  | conserved            |
| FIG4     | 0.4289846  | 0.1232811  | conserved  | conserved            |
| FIGLA    | 0          | 0          | conserved  | conserved            |
| FIGN     | 0.62267301 | 0.00093514 | conserved  | conserved            |
| FILIP1   | 0.24190014 | 0.01915362 | conserved  | conserved            |
| FILIP1L  | 0.30916008 | 0.00445219 | conserved  | conserved            |
| FITM1    | 0.00260203 | 0          | conserved  | conserved            |
| FITM2    | 0.02712053 | 0.08978123 | conserved  | conserved            |

|         |            |            |            |           |
|---------|------------|------------|------------|-----------|
| FKBP10  | 0.12110714 | 0.35958056 | conserved  | conserved |
| FKBP14  | 0.24729628 | 0.18869109 | conserved  | conserved |
| FKBP15  | 0.4885965  | 0.12017579 | conserved  | conserved |
| FKBP1B  | 0.05424441 | 0.1025252  | conserved  | conserved |
| FKBP4   | 0.15969057 | 1.68045339 | mouse-RGL  | conserved |
| FKBP5   | 3.44619714 | 0.05848271 | monkey-NSC | conserved |
| FKBP6   | 0.01829097 | 0          | conserved  | conserved |
| FKBP7   | 0.03848447 | 0.04894136 | conserved  | conserved |
| FKBP8   | 0.36069092 | 1.9727852  | mouse-RGL  | conserved |
| FKBP9   | 0.25590372 | 0.55365435 | conserved  | conserved |
| FKBPL   | 0.01378201 | 0.13448701 | conserved  | conserved |
| FLAD1   | 0.31292121 | 0.13654469 | conserved  | conserved |
| FLI1    | 0.04770089 | 0          | conserved  | conserved |
| FLII    | 0.14385452 | 0.12802611 | conserved  | conserved |
| FLNA    | 0.08766421 | 0.28650321 | conserved  | conserved |
| FLNB    | 0.52702782 | 0.09415063 | conserved  | conserved |
| FLOT1   | 0.4851137  | 0.37448619 | conserved  | conserved |
| FLRT1   | 0.12114298 | 0.04441121 | conserved  | conserved |
| FLRT2   | 1.23239786 | 0.11585731 | monkey-NSC | conserved |
| FLRT3   | 0.19519234 | 0.13527992 | conserved  | conserved |
| FLT1    | 0.04900558 | 0.0042309  | conserved  | conserved |
| FLT3    | 0.19687646 | 0          | conserved  | conserved |
| FLT4    | 0          | 0          | conserved  | conserved |
| FLYWCH1 | 1.17500026 | 0.43410005 | conserved  | conserved |
| FLYWCH2 | 0.2050881  | 0.49135431 | conserved  | conserved |
| FMN1    | 0.1550491  | 0          | conserved  | conserved |
| FMNL1   | 0.04704719 | 0.01671208 | conserved  | conserved |
| FMNL2   | 13.6347852 | 0.35669335 | monkey-NSC | conserved |
| FMNL3   | 0.32721378 | 0.04480024 | conserved  | conserved |
| FMO1    | 0          | 0.30363302 | conserved  | conserved |
| FMO2    | 0          | 0          | conserved  | conserved |
| FMO3    | 0.00110751 | 0          | conserved  | conserved |
| FMO4    | 0.04541668 | 0          | conserved  | conserved |
| FMO5    | 0.12271364 | 0.04553069 | conserved  | conserved |
| FMOD    | 0.00197005 | 0.01260208 | conserved  | conserved |
| FMR1    | 0.45664026 | 0.50671123 | conserved  | conserved |
| FMR1NB  | 0.00879708 | 0          | conserved  | conserved |
| FN1     | 0.19073262 | 0.0805219  | conserved  | conserved |
| FNBP1   | 10.765848  | 0.45378735 | conserved  | conserved |
| FNBP1L  | 2.14656993 | 0.36575887 | conserved  | conserved |
| FNDC1   | 0.00673653 | 0          | conserved  | conserved |

|          |            |            |            |           |
|----------|------------|------------|------------|-----------|
| FNDC3A   | 1.57918686 | 0.51862466 | conserved  | conserved |
| FNDC3B   | 4.10327791 | 0.29793983 | monkey-NSC | conserved |
| FNDC4    | 0.05312175 | 0.87331436 | conserved  | conserved |
| FNDC7    | 0.00442769 | 0          | conserved  | conserved |
| FNDC8    | 0          | 0          | conserved  | conserved |
| FNIP2    | 0.90814087 | 0.06971115 | conserved  | conserved |
| FOCAD    | 2.43578361 | 0.16024592 | monkey-NSC | conserved |
| FOLH1    | 2.90495015 | 0.06295206 | monkey-NSC | conserved |
| FOLR1    | 0.00110045 | 0.01109802 | conserved  | conserved |
| FOLR2    | 0.02246554 | 0          | conserved  | conserved |
| FOS      | 0.06972546 | 15.1574132 | mouse-RGL  | conserved |
| FOSB     | 0.00226592 | 0.67560308 | conserved  | conserved |
| FOSL1    | 0.01256885 | 0          | conserved  | conserved |
| FOSL2    | 0.06849098 | 0.03184905 | conserved  | conserved |
| FOXA2    | 0          | 0          | conserved  | conserved |
| FOXA3    | 0.00306746 | 0          | conserved  | conserved |
| FOXF2    | 0.0131951  | 0          | conserved  | conserved |
| FOXG1    | 0.03716307 | 1.78620447 | conserved  | conserved |
| FOXH1    | 0.01179793 | 0          | conserved  | conserved |
| FOXI3    | 0          | 0          | conserved  | conserved |
| FOXJ2    | 0.37014551 | 0.09782499 | conserved  | conserved |
| FOXJ3    | 1.85810634 | 0.21111836 | conserved  | conserved |
| FOXK1    | 1.04992563 | 0.11340265 | conserved  | conserved |
| FOXK2    | 0.56213057 | 0.21036932 | conserved  | conserved |
| FOXM1    | 0.00977464 | 0.03679338 | conserved  | conserved |
| FOXN1    | 0          | 0          | conserved  | conserved |
| FOXN2    | 1.15635502 | 0.21507894 | conserved  | conserved |
| FOXN3    | 6.69506159 | 0.46354801 | conserved  | conserved |
| FOXN4    | 0.00698509 | 0          | conserved  | conserved |
| FOXO1    | 6.27203269 | 1.04589268 | conserved  | conserved |
| FOXO3    | 3.01828294 | 0.34749862 | conserved  | conserved |
| FOXO4    | 0.03612823 | 0.07232908 | conserved  | conserved |
| FOXO6    | 0.0157845  | 0.08595023 | conserved  | conserved |
| FOXP2    | 0.14524209 | 0.02249054 | conserved  | conserved |
| FOXP3    | 0.03016824 | 0          | conserved  | conserved |
| FOXP4    | 0.10601848 | 0.05126474 | conserved  | conserved |
| FOXRED1  | 0.46658265 | 0.1303833  | conserved  | conserved |
| FOXRED2  | 0.08796981 | 0.11025234 | conserved  | conserved |
| FPGS     | 0.4163252  | 0.10918324 | conserved  | conserved |
| FRA10AC1 | 0.22639744 | 0.21221543 | conserved  | conserved |
| FREM1    | 1.1414076  | 0.04343646 | conserved  | conserved |

|        |            |            |            |           |
|--------|------------|------------|------------|-----------|
| FREM2  | 0.05717924 | 0.12506854 | conserved  | conserved |
| FREM3  | 0.01121342 | 0          | conserved  | conserved |
| FRK    | 0.00834644 | 0          | conserved  | conserved |
| FRMD3  | 0.19505345 | 0.08302276 | conserved  | conserved |
| FRMD4B | 1.02872536 | 0.16948594 | conserved  | conserved |
| FRMD6  | 0.40728348 | 0.08616075 | conserved  | conserved |
| FRMD7  | 0.00133043 | 0          | conserved  | conserved |
| FRMPD1 | 0.12233051 | 0.02655471 | conserved  | conserved |
| FRMPD4 | 2.93592736 | 0.00235325 | monkey-NSC | conserved |
| FRRS1  | 0.07510531 | 0.06069051 | conserved  | conserved |
| FRRS1L | 0.54874549 | 0.42989745 | conserved  | conserved |
| FRS2   | 0.57745271 | 0.11802399 | conserved  | conserved |
| FRS3   | 0.08999328 | 0.06709526 | conserved  | conserved |
| FRY    | 1.29195146 | 0.23505894 | conserved  | conserved |
| FRYL   | 1.69514765 | 0.42251268 | conserved  | conserved |
| FRZB   | 0.18465533 | 1.76693368 | mouse-RGL  | conserved |
| FSCB   | 0          | 0          | conserved  | conserved |
| FSCN1  | 0.13227338 | 0.72397853 | conserved  | conserved |
| FSCN2  | 0.00245064 | 0.00650059 | conserved  | conserved |
| FSCN3  | 0.00423556 | 0          | conserved  | conserved |
| FSD1   | 0.086674   | 0.31232639 | conserved  | conserved |
| FSD1L  | 0.59898874 | 0.30172527 | conserved  | conserved |
| FSD2   | 0.17476515 | 0.00973963 | conserved  | conserved |
| FSHB   | 0          | 0          | conserved  | conserved |
| FSHR   | 0.00508644 | 0          | conserved  | conserved |
| FSIP1  | 0.05517609 | 0.00752122 | conserved  | conserved |
| FSIP2  | 0.12565584 | 0          | conserved  | conserved |
| FST    | 0.00643994 | 0.01408214 | conserved  | conserved |
| FSTL1  | 0.62397473 | 0.86728024 | conserved  | conserved |
| FSTL5  | 1.5707276  | 0.43030893 | conserved  | conserved |
| FTCD   | 0.00414873 | 0          | conserved  | conserved |
| FTO    | 7.93214697 | 0.75792901 | conserved  | conserved |
| FTSJ1  | 0.0616372  | 0.22255529 | conserved  | conserved |
| FTSJ3  | 0.03631324 | 0.27742008 | conserved  | conserved |
| FUBP1  | 0.87104705 | 2.3600747  | mouse-RGL  | conserved |
| FUBP3  | 0.48470414 | 0.57464751 | conserved  | conserved |
| FUCA1  | 0.1849482  | 0.85017077 | conserved  | conserved |
| FUCA2  | 0.05376673 | 0.12799924 | conserved  | conserved |
| FUOM   | 0.05939772 | 0.20163201 | conserved  | conserved |
| FURIN  | 0.1329578  | 0.19714237 | conserved  | conserved |
| FUT1   | 0.00062106 | 0          | conserved  | conserved |



|           |            |            |            |           |
|-----------|------------|------------|------------|-----------|
| FUT10     | 2.6620615  | 0.07685131 | monkey-NSC | conserved |
| FUT11     | 0.01527548 | 0.07976129 | conserved  | conserved |
| FUT7      | 0          | 0          | conserved  | conserved |
| FUT8      | 3.71404769 | 0.27551307 | conserved  | conserved |
| FUT9      | 5.35799129 | 1.77456573 | monkey-NSC | conserved |
| FUZ       | 0.06625264 | 0.43905992 | conserved  | conserved |
| FXN       | 0.42571692 | 0.91507896 | conserved  | conserved |
| FXR1      | 0.99411713 | 0.47251031 | conserved  | conserved |
| FXR2      | 0.27911728 | 0.2110829  | conserved  | conserved |
| FYCO1     | 0.2176139  | 0.2032376  | conserved  | conserved |
| FYN       | 5.27692014 | 1.00154164 | conserved  | conserved |
| FYTTD1    | 0.44630759 | 0.63912997 | conserved  | conserved |
| FZD2      | 0.01380753 | 0.25629125 | conserved  | conserved |
| FZD3      | 0.89832023 | 0.2311844  | conserved  | conserved |
| FZD4      | 0.15546816 | 0.00969957 | conserved  | conserved |
| FZD6      | 0.27727151 | 0.1314847  | conserved  | conserved |
| FZR1      | 0.13399051 | 0.42840197 | conserved  | conserved |
| GOS2      | 0.00382017 | 0.15875836 | conserved  | conserved |
| G2E3      | 0.42467037 | 0.17060275 | conserved  | conserved |
| G3BP1     | 0.73729234 | 1.48400913 | conserved  | conserved |
| G3BP2     | 0.20466381 | 1.28311535 | mouse-RGL  | conserved |
| GAA       | 0.16997042 | 0.45629592 | conserved  | conserved |
| GAB1      | 2.24491274 | 0.45941646 | conserved  | conserved |
| GAB2      | 2.18189856 | 0.05510522 | conserved  | conserved |
| GABARAPL1 | 0.3014562  | 1.11160683 | conserved  | conserved |
| GABARAPL2 | 0.21085517 | 2.59514335 | mouse-RGL  | conserved |
| GABBR1    | 10.3796014 | 2.99564962 | conserved  | conserved |
| GABBR2    | 1.30498068 | 0.05705051 | conserved  | conserved |
| GABPA     | 0.4079409  | 0.29446183 | conserved  | conserved |
| GABPB1    | 0.62051166 | 0.19262606 | conserved  | conserved |
| GABRA1    | 0.4112915  | 0.01581255 | conserved  | conserved |
| GABRA2    | 5.68025505 | 0.38547252 | monkey-NSC | conserved |
| GABRA4    | 0.25863592 | 0.64591326 | conserved  | conserved |
| GABRA5    | 0.4125895  | 0.07799629 | conserved  | conserved |
| GABRA6    | 0.04078819 | 0          | conserved  | conserved |
| GABRB2    | 1.65232111 | 0.00573816 | conserved  | conserved |
| GABRB3    | 2.65780811 | 0.10311638 | conserved  | conserved |
| GABRG1    | 2.34675279 | 0.09170315 | monkey-NSC | conserved |
| GABRG2    | 0.8293941  | 0.0358647  | conserved  | conserved |
| GABRG3    | 0.86927352 | 0.12038013 | monkey-NSC | conserved |
| GABRP     | 0          | 0          | conserved  | conserved |

|            |            |            |            |           |
|------------|------------|------------|------------|-----------|
| GABRR1     | 0.00431814 | 0          | conserved  | conserved |
| GABRR3     | 0.00192946 | 0          | conserved  | conserved |
| GAD1       | 0.26279635 | 0.05378142 | conserved  | conserved |
| GAD2       | 0.16137645 | 0.05688516 | conserved  | conserved |
| GADD45A    | 0.01603577 | 0.11956135 | conserved  | conserved |
| GADD45B    | 0.10435099 | 0.10414772 | conserved  | conserved |
| GADD45GIP1 | 0.09843875 | 0.83925266 | conserved  | conserved |
| GADL1      | 0.01067875 | 0.01814897 | conserved  | conserved |
| GAK        | 0.6848042  | 0.15378126 | conserved  | conserved |
| GAL3ST4    | 0.06189664 | 0          | conserved  | conserved |
| GALC       | 0.56487369 | 0.19743489 | conserved  | conserved |
| GALE       | 0.12797116 | 0.06510543 | conserved  | conserved |
| GALK1      | 0.02639863 | 0.44643817 | conserved  | conserved |
| GALK2      | 1.25895671 | 0.16026286 | conserved  | conserved |
| GALM       | 0.51176033 | 0.02025928 | conserved  | conserved |
| GALNS      | 0.14631448 | 0.02895475 | conserved  | conserved |
| GALNT1     | 1.03033366 | 0.59466038 | conserved  | conserved |
| GALNT10    | 0.62248985 | 0.01477031 | conserved  | conserved |
| GALNT11    | 0.31869841 | 0.38694696 | conserved  | conserved |
| GALNT12    | 0.07064015 | 0          | conserved  | conserved |
| GALNT14    | 0.11301197 | 0.07771057 | conserved  | conserved |
| GALNT15    | 0.03232202 | 0.21895453 | conserved  | conserved |
| GALNT16    | 3.24433438 | 0.60163679 | monkey-NSC | conserved |
| GALNT18    | 9.06351716 | 0.04486144 | monkey-NSC | conserved |
| GALNT3     | 0.1599464  | 0.01858901 | conserved  | conserved |
| GALNT5     | 0.01280806 | 0          | conserved  | conserved |
| GALNT6     | 0.04201868 | 0          | conserved  | conserved |
| GALNT7     | 0.56009789 | 0.11683295 | conserved  | conserved |
| GALNT9     | 0.05557737 | 0.04795291 | conserved  | conserved |
| GALNTL5    | 0.0946614  | 0          | conserved  | conserved |
| GALNTL6    | 1.49205674 | 0.01973606 | conserved  | conserved |
| GAMT       | 0.04620695 | 0.49928266 | conserved  | conserved |
| GAN        | 1.26140825 | 0.29577177 | conserved  | conserved |
| GANAB      | 0.54117397 | 0.57619394 | conserved  | conserved |
| GAP43      | 0.34986495 | 0.50574525 | conserved  | conserved |
| GAPDHS     | 0.05597069 | 0.00415835 | conserved  | conserved |
| GAPVD1     | 1.36069911 | 0.71546881 | conserved  | conserved |
| GAR1       | 0.0537327  | 0.71585286 | mouse-RGL  | conserved |
| GARNL3     | 1.46397052 | 0.1197027  | conserved  | conserved |
| GART       | 0.21563567 | 0.28512722 | conserved  | conserved |
| GAS2       | 0.20378205 | 0.12379646 | conserved  | conserved |

|         |            |            |           |           |
|---------|------------|------------|-----------|-----------|
| GAS2L1  | 0.26509977 | 0.18936585 | conserved | conserved |
| GAS2L2  | 0.00294977 | 0          | conserved | conserved |
| GAS6    | 0.04681562 | 0.61227695 | conserved | conserved |
| GAS7    | 0.51294368 | 0.2427183  | conserved | conserved |
| GAS8    | 0.3878335  | 0.14011935 | conserved | conserved |
| GATA1   | 0          | 0          | conserved | conserved |
| GATA2   | 0          | 0.00274003 | conserved | conserved |
| GATA3   | 0.00358143 | 0          | conserved | conserved |
| GATA4   | 0.03880665 | 0          | conserved | conserved |
| GATA5   | 0.00942777 | 0          | conserved | conserved |
| GATAD1  | 0.37130359 | 0.57241033 | conserved | conserved |
| GATAD2B | 0.23558647 | 1.11556286 | conserved | conserved |
| GATB    | 0.55670432 | 0.04329003 | conserved | conserved |
| GATM    | 0.554245   | 0.23457048 | conserved | conserved |
| GBA     | 0.04596525 | 0.14845907 | conserved | conserved |
| GBA2    | 0.39304211 | 0.09488181 | conserved | conserved |
| GBE1    | 0.93727327 | 0.19944537 | conserved | conserved |
| GBF1    | 2.19416493 | 0.25937759 | conserved | conserved |
| GBX1    | 0.00474776 | 0          | conserved | conserved |
| GC      | 0          | 0          | conserved | conserved |
| GCA     | 0.08800566 | 0.22160853 | conserved | conserved |
| GCC2    | 0.96901778 | 0.34987207 | conserved | conserved |
| GCDH    | 0.0896734  | 0.26429325 | conserved | conserved |
| GCFC2   | 0.51333114 | 0.12236707 | conserved | conserved |
| GCH1    | 0.06529153 | 0.01194646 | conserved | conserved |
| GCHFR   | 0.00858791 | 0.03704532 | conserved | conserved |
| GCK     | 0.0819168  | 0.01454494 | conserved | conserved |
| GCKR    | 0.00950119 | 0          | conserved | conserved |
| GCLM    | 0.21833957 | 0.63809161 | conserved | conserved |
| GCM2    | 0          | 0          | conserved | conserved |
| GCNT1   | 0.01604712 | 0          | conserved | conserved |
| GCNT2   | 0.07031544 | 0.01864817 | conserved | conserved |
| GCNT3   | 0.00266093 | 0          | conserved | conserved |
| GCNT4   | 0.02096232 | 0.0169494  | conserved | conserved |
| GCSAM   | 0          | 0          | conserved | conserved |
| GDA     | 0.29369842 | 0.04040621 | conserved | conserved |
| GDAP1   | 0.19532118 | 0.0924245  | conserved | conserved |
| GDAP1L1 | 0.16897958 | 0.09673271 | conserved | conserved |
| GDAP2   | 0.38272224 | 0.08997792 | conserved | conserved |
| GDE1    | 0.13937394 | 1.4225002  | conserved | conserved |
| GDF10   | 0.01126481 | 1.47487456 | mouse-RGL | conserved |

|        |            |            |            |           |
|--------|------------|------------|------------|-----------|
| GDF2   | 0.00085935 | 0          | conserved  | conserved |
| GDF6   | 0          | 0          | conserved  | conserved |
| GDI1   | 0.60690081 | 1.03764318 | conserved  | conserved |
| GDI2   | 0.96098259 | 2.61251304 | conserved  | conserved |
| GDNF   | 0.00934821 | 0          | conserved  | conserved |
| GDPD1  | 1.73952041 | 0.35594369 | conserved  | conserved |
| GDPD2  | 0.21191814 | 0.40110873 | conserved  | conserved |
| GDPD3  | 0.01322809 | 0.22753093 | conserved  | conserved |
| GDPD4  | 0.0109772  | 0          | conserved  | conserved |
| GDPD5  | 0.05298229 | 0.06695523 | conserved  | conserved |
| GEMIN4 | 0.03423553 | 0.00897106 | conserved  | conserved |
| GEMIN5 | 0.19865901 | 0.12822088 | conserved  | conserved |
| GEMIN8 | 0.09289295 | 0.19347678 | conserved  | conserved |
| GEN1   | 0.10142249 | 0          | conserved  | conserved |
| GET4   | 0.65209702 | 0.48726326 | conserved  | conserved |
| GFAP   | 3.93229894 | 4.72603238 | conserved  | conserved |
| GFER   | 0.01961316 | 0.53369509 | conserved  | conserved |
| GFI1   | 0.00077393 | 0          | conserved  | conserved |
| GFI1B  | 0          | 0          | conserved  | conserved |
| GFM1   | 0.31879855 | 0.10092015 | conserved  | conserved |
| GFM2   | 0.43605028 | 0.12808258 | conserved  | conserved |
| GFOD1  | 1.06353367 | 0.00896824 | conserved  | conserved |
| GFPT1  | 0.30426935 | 0.36536905 | conserved  | conserved |
| GFPT2  | 0.1398644  | 0.02446265 | conserved  | conserved |
| GFRA1  | 0.10725049 | 0.05398217 | conserved  | conserved |
| GFRA2  | 0.11253096 | 0.03602063 | conserved  | conserved |
| GFRA3  | 0.00910597 | 0          | conserved  | conserved |
| GFRA4  | 0.00378798 | 0.0997295  | conserved  | conserved |
| GGA1   | 0.25066846 | 0.26868529 | conserved  | conserved |
| GGA2   | 0.82925161 | 0.11360238 | conserved  | conserved |
| GGA3   | 0.2392191  | 0.05659378 | conserved  | conserved |
| GGCX   | 0.2171398  | 0.0736359  | conserved  | conserved |
| GGPS1  | 0.30297794 | 0.1567009  | conserved  | conserved |
| GGT7   | 1.08405758 | 0.11526324 | conserved  | conserved |
| GHDC   | 0.08372194 | 0.12845304 | conserved  | conserved |
| GHITM  | 0.34820939 | 0.88320833 | conserved  | conserved |
| GHR    | 1.53190324 | 0.09225409 | monkey-NSC | conserved |
| GHRH   | 0.00416156 | 0          | conserved  | conserved |
| GHRHR  | 0          | 0          | conserved  | conserved |
| GHRL   | 0.00631651 | 0          | conserved  | conserved |
| GHSR   | 0.00259618 | 0          | conserved  | conserved |

|        |            |            |            |           |
|--------|------------|------------|------------|-----------|
| GID4   | 0.16845101 | 0.29864343 | conserved  | conserved |
| GID8   | 0.01997731 | 0.36228547 | conserved  | conserved |
| GIGYF1 | 0.16811225 | 0.29069982 | conserved  | conserved |
| GIGYF2 | 3.08314508 | 0.64035461 | conserved  | conserved |
| GIMAP4 | 0.00364298 | 0          | conserved  | conserved |
| GIMAP6 | 0          | 0.00405856 | conserved  | conserved |
| GIMAP7 | 0.0023692  | 0          | conserved  | conserved |
| GIMAP8 | 0.00439813 | 0.00286524 | conserved  | conserved |
| GIMD1  | 0.00035398 | 0          | conserved  | conserved |
| GIN1   | 0.18530579 | 0.29251136 | conserved  | conserved |
| GINM1  | 0.56856369 | 0.51595385 | conserved  | conserved |
| GINS1  | 0.4205192  | 0.22069784 | conserved  | conserved |
| GINS4  | 0.04158073 | 0.33564882 | conserved  | conserved |
| GIPC1  | 0.15256062 | 0.95424142 | conserved  | conserved |
| GIPC2  | 0.0313309  | 0          | conserved  | conserved |
| GIPR   | 0.01030201 | 0          | conserved  | conserved |
| GIT1   | 0.32699983 | 0.17264347 | conserved  | conserved |
| GIT2   | 1.00777239 | 0.4529369  | conserved  | conserved |
| GJA10  | 0.00362335 | 0          | conserved  | conserved |
| GJA5   | 0.00097568 | 0          | conserved  | conserved |
| GJA8   | 0.00057861 | 0          | conserved  | conserved |
| GJB2   | 0          | 0.02205368 | conserved  | conserved |
| GJB4   | 0          | 0.00945804 | conserved  | conserved |
| GJB5   | 0          | 0          | conserved  | conserved |
| GJB6   | 0.28091728 | 0.15205812 | conserved  | conserved |
| GJC3   | 0.00320641 | 0.00750818 | conserved  | conserved |
| GJD2   | 0.00073302 | 0.00550179 | conserved  | conserved |
| GK2    | 0.00097415 | 0          | conserved  | conserved |
| GK5    | 0.28233098 | 0.0507471  | conserved  | conserved |
| GKAP1  | 1.41998101 | 0.58376199 | conserved  | conserved |
| GKN2   | 0          | 0          | conserved  | conserved |
| GLA    | 0.03231519 | 0.01857387 | conserved  | conserved |
| GLB1L  | 0.10526009 | 0.04710501 | conserved  | conserved |
| GLB1L2 | 0.0222986  | 0.05760567 | conserved  | conserved |
| GLB1L3 | 0          | 0          | conserved  | conserved |
| GLCCI1 | 2.29434622 | 0.03728837 | monkey-NSC | conserved |
| GLCE   | 0.19561063 | 0.10359089 | conserved  | conserved |
| GLDC   | 0.68333665 | 0.98902533 | conserved  | conserved |
| GLDN   | 0.1934198  | 0.00901753 | conserved  | conserved |
| GLE1   | 0.82312959 | 0.39789956 | conserved  | conserved |
| GLG1   | 3.51200321 | 0.62800783 | conserved  | conserved |

|         |            |            |            |                      |
|---------|------------|------------|------------|----------------------|
| GLI1    | 0.03361053 | 0.18925984 | conserved  | conserved            |
| GLI2    | 1.27655696 | 0.20013805 | monkey-NSC | conserved            |
| GLIPR2  | 0.32707198 | 0.07133796 | conserved  | conserved            |
| GLIS1   | 0.24955203 | 0          | conserved  | conserved            |
| GLIS2   | 0.06584897 | 0.09285134 | conserved  | conserved            |
| GLMN    | 0.68323912 | 0.35799484 | conserved  | conserved            |
| GLO1    | 0.65000806 | 3.59118366 | mouse-RGL  | conserved            |
| GLOD4   | 0.12498001 | 0.32828678 | conserved  | conserved            |
| GLOD5   | 0.00106608 | 0          | conserved  | conserved            |
| GLP1R   | 0.00204513 | 0          | conserved  | conserved            |
| GLP2R   | 0.00843383 | 0          | conserved  | conserved            |
| GLRA1   | 0.02453378 | 0.00403943 | conserved  | conserved            |
| GLRA2   | 0.39710494 | 0.03072389 | conserved  | conserved            |
| GLRA3   | 0.33103221 | 0          | conserved  | conserved            |
| GLRB    | 0.58387365 | 0.17992444 | conserved  | conserved            |
| GLRX    | 0.09548371 | 0.19174008 | conserved  | conserved            |
| GLRX3   | 0.6363839  | 1.31383523 | conserved  | conserved            |
| GLS     | 1.76757363 | 0.28757971 | conserved  | conserved            |
| GLT6D1  | 0.00173501 | 0          | conserved  | conserved            |
| GLT8D1  | 0.34909575 | 0.40850823 | conserved  | conserved            |
| GLT8D2  | 0.12662764 | 0          | conserved  | conserved            |
| GLUL    | 2.6939335  | 3.62897722 | monkey-NSC | conserved            |
| GLYAT   | 0.01375005 | 0          | conserved  | conserved            |
| GLYATL3 | 0.00248441 | 0          | conserved  | conserved            |
| GLYCTK  | 0.0272109  | 0.00578072 | conserved  | conserved            |
| GLYR1   | 0.7507481  | 0.62805963 | conserved  | conserved            |
| GM2A    | 0.05402097 | 1.73241328 | conserved  | conserved            |
| GMDS    | 2.43486986 | 0.0956309  | monkey-NSC | conserved            |
| GMEB1   | 0.16134737 | 0.15568654 | conserved  | conserved            |
| GMEB2   | 0.26647767 | 0.02064011 | conserved  | conserved            |
| GMFB    | 0.21907224 | 0.51462776 | conserved  | conserved            |
| GMIP    | 0.05466151 | 0.05401858 | conserved  | conserved            |
| GMNC    | 0.00359662 | 0.00717597 | conserved  | conserved            |
| GMNN    | 0.12295993 | 0.21140737 | conserved  | conserved            |
| GMPPA   | 0.0444014  | 0.19533068 | conserved  | conserved            |
| GMPR    | 0.41837837 | 0.35930007 | conserved  | conserved            |
| GMPR2   | 0.22558426 | 0.22695532 | conserved  | conserved            |
| GMPS    | 0.90685781 | 0.51437761 | conserved  | conserved            |
| GNA12   | 2.60081304 | 0.48076484 | conserved  | conserved            |
| GNA13   | 1.34647009 | 0.81715525 | conserved  | conserved            |
| GNA14   | 1.18426885 | 0.04725906 | monkey-NSC | monkey-NSC1-enriched |

|         |            |            |            |           |
|---------|------------|------------|------------|-----------|
| GNAI1   | 0.22508581 | 0.64651536 | conserved  | conserved |
| GNAI2   | 0.55031227 | 5.46763715 | conserved  | conserved |
| GNAI3   | 0.47184058 | 0.89432094 | conserved  | conserved |
| GNAO1   | 3.9271637  | 3.0595576  | conserved  | conserved |
| GNAS    | 1.66040903 | 5.69604032 | mouse-RGL  | conserved |
| GNAT2   | 0.03454468 | 0          | conserved  | conserved |
| GNAZ    | 0.15875739 | 0.25632804 | conserved  | conserved |
| GNB1    | 2.69511356 | 2.49529057 | conserved  | conserved |
| GNB2    | 0.33112011 | 6.07132464 | mouse-RGL  | conserved |
| GNB3    | 0.18090152 | 0          | conserved  | conserved |
| GNB4    | 0.39745816 | 0.69746619 | conserved  | conserved |
| GNB5    | 0.7141648  | 0.00350613 | conserved  | conserved |
| GNE     | 0.62350059 | 0.06179492 | conserved  | conserved |
| GNG4    | 0.02337981 | 0.01486604 | conserved  | conserved |
| GNGT1   | 0          | 0          | conserved  | conserved |
| GNL1    | 0.249944   | 0.32991219 | conserved  | conserved |
| GNL2    | 0.15267729 | 0.36666642 | conserved  | conserved |
| GNL3    | 0.19204403 | 0.4601438  | conserved  | conserved |
| GNMT    | 0.03892303 | 0          | conserved  | conserved |
| GNPAT   | 0.59022002 | 0.29780706 | conserved  | conserved |
| GNPDA1  | 0.23652875 | 0.18955976 | conserved  | conserved |
| GNPDA2  | 0.49872374 | 0.64189316 | conserved  | conserved |
| GNPNAT1 | 0.13072223 | 0.33982505 | conserved  | conserved |
| GNPTAB  | 1.93941006 | 0.1634808  | conserved  | conserved |
| GNPTG   | 0.14199158 | 0.4145777  | conserved  | conserved |
| GNRH1   | 0.0124215  | 0.00467569 | conserved  | conserved |
| GNRHR   | 0          | 0          | conserved  | conserved |
| GNS     | 0.52481183 | 0.25186771 | conserved  | conserved |
| GOLGA1  | 1.15857249 | 0.2534813  | conserved  | conserved |
| GOLGA3  | 0.3596356  | 0.14962343 | conserved  | conserved |
| GOLGA4  | 2.80975148 | 0.36556585 | monkey-NSC | conserved |
| GOLGA5  | 0.50395541 | 0.19867387 | conserved  | conserved |
| GOLGA7  | 0.21086555 | 1.45191719 | mouse-RGL  | conserved |
| GOLGA7B | 0.13693423 | 0.04429971 | conserved  | conserved |
| GOLGB1  | 1.33372748 | 0.90015802 | conserved  | conserved |
| GOLM1   | 0.46410472 | 0.14164262 | conserved  | conserved |
| GOLPH3  | 0.7339361  | 0.55027309 | conserved  | conserved |
| GOLPH3L | 0.3033232  | 0.22605944 | conserved  | conserved |
| GOLT1B  | 0.12799602 | 0.59628942 | conserved  | conserved |
| GORAB   | 0.1008397  | 0.17209244 | conserved  | conserved |
| GORASP1 | 0.17670472 | 0.09168367 | conserved  | conserved |

|          |            |            |            |           |
|----------|------------|------------|------------|-----------|
| GORASP2  | 0.2282345  | 0.65237904 | conserved  | conserved |
| GOSR1    | 0.50037732 | 0.10770805 | conserved  | conserved |
| GOT1     | 0.39077688 | 0.18157476 | conserved  | conserved |
| GOT1L1   | 0.00091262 | 0.004558   | conserved  | conserved |
| GOT2     | 0.24741207 | 0.36605979 | conserved  | conserved |
| GP2      | 0          | 0          | conserved  | conserved |
| GPAA1    | 0.1056998  | 0.27172941 | conserved  | conserved |
| GPAM     | 1.15254195 | 0.00316043 | monkey-NSC | conserved |
| GPAT4    | 0.16216695 | 0.40869063 | conserved  | conserved |
| GPATCH1  | 0.20183446 | 0.12491768 | conserved  | conserved |
| GPATCH11 | 0.13116195 | 0.37953506 | conserved  | conserved |
| GPATCH2  | 1.87772716 | 0.32053237 | conserved  | conserved |
| GPATCH2L | 0.78653388 | 0.06516982 | conserved  | conserved |
| GPATCH3  | 0.07852371 | 0.01833219 | conserved  | conserved |
| GPATCH4  | 0.14250266 | 0.30133549 | conserved  | conserved |
| GPATCH8  | 4.6117459  | 0.65700871 | conserved  | conserved |
| GPBP1L1  | 1.08385482 | 0.25743528 | conserved  | conserved |
| GPC3     | 0.05402642 | 0.01987515 | conserved  | conserved |
| GPC4     | 0.60027893 | 0.31493831 | conserved  | conserved |
| GPC5     | 48.2660287 | 0.22753999 | monkey-NSC | conserved |
| GPC6     | 14.2811672 | 0.7678915  | monkey-NSC | conserved |
| GPCPD1   | 0.42813159 | 0.4187716  | conserved  | conserved |
| GPD1     | 0.03823773 | 0.5130228  | conserved  | conserved |
| GPD1L    | 0.13846765 | 0.22626231 | conserved  | conserved |
| GPD2     | 1.29664554 | 0.56736008 | conserved  | conserved |
| GPER1    | 0.00180078 | 0.10858182 | conserved  | conserved |
| GPHA2    | 0.00234613 | 0          | conserved  | conserved |
| GPHB5    | 0.00255502 | 0          | conserved  | conserved |
| GPHN     | 11.5708494 | 0.27256022 | conserved  | conserved |
| GPKOW    | 0.12179767 | 0.16579061 | conserved  | conserved |
| GPLD1    | 0.25444969 | 0.31588038 | conserved  | conserved |
| GPM6A    | 69.2897022 | 7.64624154 | monkey-NSC | conserved |
| GPM6B    | 9.70073232 | 13.2242121 | monkey-NSC | conserved |
| GPN1     | 0.10322333 | 0.31085786 | conserved  | conserved |
| GPN2     | 0.11417465 | 0.11304341 | conserved  | conserved |
| GPN3     | 0.1043463  | 0.13903091 | conserved  | conserved |
| GPNMB    | 0.01984781 | 0.01101839 | conserved  | conserved |
| GPR1     | 0.15138624 | 0          | conserved  | conserved |
| GPR101   | 0.00177315 | 0          | conserved  | conserved |
| GPR107   | 1.19114665 | 0.32952192 | conserved  | conserved |
| GPR12    | 0.02123753 | 0.01657976 | conserved  | conserved |



|         |            |            |            |           |
|---------|------------|------------|------------|-----------|
| GPR137  | 0.25626379 | 0.17591455 | conserved  | conserved |
| GPR137B | 0.74645925 | 0.22929619 | conserved  | conserved |
| GPR137C | 0.45658495 | 0          | conserved  | conserved |
| GPR142  | 0.00841528 | 0          | conserved  | conserved |
| GPR143  | 0.03228145 | 0          | conserved  | conserved |
| GPR146  | 0.01095113 | 0.14079108 | conserved  | conserved |
| GPR149  | 0.0285529  | 0          | conserved  | conserved |
| GPR15   | 0          | 0          | conserved  | conserved |
| GPR151  | 0          | 0          | conserved  | conserved |
| GPR155  | 0.77393959 | 0.04616719 | conserved  | conserved |
| GPR156  | 0.66635279 | 0.02335807 | conserved  | conserved |
| GPR160  | 0.02427947 | 0.00211684 | conserved  | conserved |
| GPR161  | 0.20272384 | 0.09974284 | conserved  | conserved |
| GPR162  | 0.29614714 | 0.07798654 | conserved  | conserved |
| GPR17   | 0          | 0.02747156 | conserved  | conserved |
| GPR171  | 0.01802163 | 0          | conserved  | conserved |
| GPR173  | 0.43105159 | 0.12735706 | conserved  | conserved |
| GPR174  | 0.00219823 | 0          | conserved  | conserved |
| GPR176  | 0.20311891 | 0.0037771  | conserved  | conserved |
| GPR179  | 0.00167289 | 0.00958354 | conserved  | conserved |
| GPR18   | 0.01857649 | 0          | conserved  | conserved |
| GPR183  | 0.00502602 | 0          | conserved  | conserved |
| GPR19   | 0.12283283 | 0.43780578 | conserved  | conserved |
| GPR20   | 0.00039304 | 0          | conserved  | conserved |
| GPR22   | 0.13213416 | 0.01848301 | conserved  | conserved |
| GPR27   | 0.02428112 | 0.0504552  | conserved  | conserved |
| GPR3    | 0.00384441 | 0.0109988  | conserved  | conserved |
| GPR37   | 0.17001362 | 0.08470847 | conserved  | conserved |
| GPR37L1 | 0.77762123 | 1.24950244 | monkey-NSC | conserved |
| GPR45   | 0          | 0.07904531 | conserved  | conserved |
| GPR55   | 0          | 0          | conserved  | conserved |
| GPR63   | 0.05412094 | 0.00627009 | conserved  | conserved |
| GPR65   | 0.00174428 | 0          | conserved  | conserved |
| GPR68   | 0.01972919 | 0.00799722 | conserved  | conserved |
| GPR82   | 0.0100878  | 0          | conserved  | conserved |
| GPR87   | 0.02381795 | 0          | conserved  | conserved |
| GPRASP2 | 0.07377356 | 0.37656569 | conserved  | conserved |
| GPRC5A  | 0          | 0          | conserved  | conserved |
| GPRC5B  | 2.126648   | 0.59225081 | monkey-NSC | conserved |
| GPRC5C  | 0.11028252 | 0.01393776 | conserved  | conserved |
| GPRC5D  | 0.05205693 | 0.00645903 | conserved  | conserved |

|         |            |            |            |           |
|---------|------------|------------|------------|-----------|
| GPRC6A  | 0.0193496  | 0          | conserved  | conserved |
| GPRIN2  | 0          | 0          | conserved  | conserved |
| GPS1    | 0.45511494 | 0.83511441 | conserved  | conserved |
| GPS2    | 0.20168704 | 0.64914543 | conserved  | conserved |
| GPSM1   | 0.19437498 | 0.20066429 | conserved  | conserved |
| GPSM2   | 0.55316052 | 0.11779096 | conserved  | conserved |
| GPSM3   | 0.00088179 | 0.00523212 | conserved  | conserved |
| GPT     | 0.58352231 | 0.06037063 | conserved  | conserved |
| GPT2    | 1.87578536 | 0.41029991 | conserved  | conserved |
| GPX1    | 0          | 1.48145009 | mouse-RGL  | conserved |
| GPX2    | 0.05062443 | 0          | conserved  | conserved |
| GPX4    | 0.00661262 | 6.77614721 | conserved  | conserved |
| GPX6    | 0.00043595 | 0          | conserved  | conserved |
| GPX7    | 0.0667641  | 0.35926012 | conserved  | conserved |
| GPX8    | 0.01765276 | 0.83719154 | conserved  | conserved |
| GRAMD1A | 0.68693746 | 0.36352612 | conserved  | conserved |
| GRAMD1B | 3.02232579 | 0.23569428 | monkey-NSC | conserved |
| GRAMD1C | 3.34204149 | 0.12950427 | conserved  | conserved |
| GRAP2   | 0.00211546 | 0          | conserved  | conserved |
| GRB10   | 0.40328776 | 0.5279255  | conserved  | conserved |
| GRB2    | 0.84213826 | 0.49450007 | conserved  | conserved |
| GRB7    | 0.02074014 | 0          | conserved  | conserved |
| GREB1L  | 0.43383229 | 0.00462855 | conserved  | conserved |
| GREM2   | 0.07588465 | 0.01283377 | conserved  | conserved |
| GRHL1   | 0.14471037 | 0.07491061 | conserved  | conserved |
| GRHL2   | 0.29112326 | 0          | conserved  | conserved |
| GRHL3   | 0.01183752 | 0          | conserved  | conserved |
| GRHPR   | 0.44881187 | 0.2152221  | conserved  | conserved |
| GRIA1   | 6.31142159 | 0.34129379 | conserved  | conserved |
| GRIA2   | 5.66878809 | 4.33649072 | monkey-NSC | conserved |
| GRIA4   | 0.83091162 | 0.02113408 | conserved  | conserved |
| GRID1   | 6.04326785 | 0.1218089  | monkey-NSC | conserved |
| GRID2   | 3.89365669 | 0.1450853  | conserved  | conserved |
| GRIK1   | 1.10921603 | 0.00856123 | conserved  | conserved |
| GRIK2   | 9.38942256 | 0.15165502 | monkey-NSC | conserved |
| GRIK3   | 0.0286492  | 0.01048394 | conserved  | conserved |
| GRIK4   | 1.17836038 | 0.04371021 | conserved  | conserved |
| GRIK5   | 1.40841139 | 0.44367265 | conserved  | conserved |
| GRIN1   | 0.59408743 | 0.06711486 | conserved  | conserved |
| GRIN2A  | 2.47157536 | 0.04154288 | monkey-NSC | conserved |
| GRIN2B  | 4.49625909 | 0.82482941 | conserved  | conserved |

|         |            |            |            |           |
|---------|------------|------------|------------|-----------|
| GRIN2C  | 0.67693412 | 0.03232796 | monkey-NSC | conserved |
| GRIN2D  | 0.17167801 | 0          | conserved  | conserved |
| GRIN3A  | 0.21938556 | 0.06802755 | conserved  | conserved |
| GRINA   | 0.52473326 | 0.99018518 | conserved  | conserved |
| GRIP1   | 0.85342033 | 0.03846345 | monkey-NSC | conserved |
| GRIP2   | 0.04177573 | 0          | conserved  | conserved |
| GRIPAP1 | 0.50179189 | 0.34823518 | conserved  | conserved |
| GRK1    | 0          | 0          | conserved  | conserved |
| GRK5    | 0.92798551 | 0.02024768 | conserved  | conserved |
| GRK6    | 0.09287998 | 0.21170446 | conserved  | conserved |
| GRM2    | 0.03029254 | 0.00469705 | conserved  | conserved |
| GRM3    | 6.39659628 | 0.40008172 | monkey-NSC | conserved |
| GRM4    | 0.02340425 | 0.00645903 | conserved  | conserved |
| GRM5    | 8.11389405 | 0.30620921 | monkey-NSC | conserved |
| GRM6    | 0          | 0          | conserved  | conserved |
| GRM7    | 3.81004755 | 0.00316978 | monkey-NSC | conserved |
| GRM8    | 0.40983354 | 0.00165916 | conserved  | conserved |
| GRN     | 0.13199856 | 0.43636145 | conserved  | conserved |
| GRP     | 0.06404461 | 0.04448411 | conserved  | conserved |
| GRPR    | 0.01075755 | 0.00853063 | conserved  | conserved |
| GRSF1   | 0.22345869 | 0.37747866 | conserved  | conserved |
| GRTF1   | 0.13578163 | 0.27693049 | conserved  | conserved |
| GRWD1   | 0.01797541 | 0.14932141 | conserved  | conserved |
| GRXCR1  | 0.00564181 | 0          | conserved  | conserved |
| GSAP    | 1.42724752 | 1.171042   | conserved  | conserved |
| GSDMD   | 0.00307932 | 0.00205787 | conserved  | conserved |
| GSE1    | 0.12872289 | 0.27071846 | conserved  | conserved |
| GSG1L   | 0.21144035 | 0.03691602 | conserved  | conserved |
| GSG1L2  | 0.00139307 | 0          | conserved  | conserved |
| GSK3B   | 3.13152676 | 2.23871677 | conserved  | conserved |
| GSKIP   | 0.15483953 | 0.27330869 | conserved  | conserved |
| GSN     | 1.29369165 | 0.07110505 | monkey-NSC | conserved |
| GSPT1   | 0.820778   | 0.711921   | conserved  | conserved |
| GSPT2   | 0.01664929 | 0.04079843 | conserved  | conserved |
| GSR     | 0.52419223 | 0.97742303 | conserved  | conserved |
| GSS     | 0.17940027 | 0.10831332 | conserved  | conserved |
| GSTCD   | 0.80196197 | 0.08658403 | conserved  | conserved |
| GSTM3   | 0.13471484 | 0.02285744 | conserved  | conserved |
| GSTO2   | 0.21827096 | 0.07723269 | conserved  | conserved |
| GSTZ1   | 0.06915554 | 0.38764352 | conserved  | conserved |
| GSX1    | 0          | 0.00493725 | conserved  | conserved |

|          |            |            |           |           |
|----------|------------|------------|-----------|-----------|
| GTDC1    | 1.7605786  | 0.14702902 | conserved | conserved |
| GTF2B    | 0.47279507 | 0.30832623 | conserved | conserved |
| GTF2E1   | 0.06882399 | 0.18430286 | conserved | conserved |
| GTF2E2   | 0.46151184 | 0.46071703 | conserved | conserved |
| GTF2F2   | 0.76247305 | 0.48614635 | conserved | conserved |
| GTF2H1   | 0.80455044 | 0.28127174 | conserved | conserved |
| GTF2H4   | 0.06901282 | 0.18353333 | conserved | conserved |
| GTF2H5   | 0.10312016 | 2.71973847 | mouse-RGL | conserved |
| GTF2I    | 4.78430205 | 1.31899714 | conserved | conserved |
| GTF2IRD1 | 1.47376094 | 0.25266847 | conserved | conserved |
| GTF3A    | 0.11517219 | 0.58259766 | conserved | conserved |
| GTF3C1   | 0.94744974 | 0.23845511 | conserved | conserved |
| GTF3C3   | 0.38419145 | 0.11679737 | conserved | conserved |
| GTF3C4   | 0.08155815 | 0.18919773 | conserved | conserved |
| GTF3C5   | 0.1513656  | 0.07114347 | conserved | conserved |
| GTPBP1   | 0.23921664 | 0.10890632 | conserved | conserved |
| GTPBP10  | 0.42059438 | 0.14607557 | conserved | conserved |
| GTPBP2   | 0.09604572 | 0.30986539 | conserved | conserved |
| GTPBP4   | 0.2244593  | 0.50080675 | conserved | conserved |
| GTPBP8   | 0.08813016 | 0.19017831 | conserved | conserved |
| GTSE1    | 0.03955434 | 0.00605706 | conserved | conserved |
| GTSF1    | 0.00734676 | 0          | conserved | conserved |
| GUCA2A   | 0          | 0          | conserved | conserved |
| GUCD1    | 0.05637609 | 0.13478912 | conserved | conserved |
| GUCY1A2  | 0.79914338 | 0.0050562  | conserved | conserved |
| GUCY2D   | 0.00824607 | 0.00736167 | conserved | conserved |
| GUCY2F   | 0.00247638 | 0.01530468 | conserved | conserved |
| GUF1     | 0.29540156 | 0.65150418 | conserved | conserved |
| GULP1    | 0.1744706  | 0.05855243 | conserved | conserved |
| GXYLT2   | 0.06728758 | 0.0121523  | conserved | conserved |
| GYS2     | 0.00048179 | 0          | conserved | conserved |
| GZF1     | 0.21192251 | 0.20173958 | conserved | conserved |
| GZMA     | 0          | 0          | conserved | conserved |
| GZMK     | 0          | 0          | conserved | conserved |
| H6PD     | 0.07825755 | 0.00962902 | conserved | conserved |
| HABP2    | 0          | 0          | conserved | conserved |
| HABP4    | 0.31648414 | 0.21111098 | conserved | conserved |
| HACD1    | 0.39277496 | 0.86678924 | conserved | conserved |
| HACD2    | 0.50003469 | 0.28066285 | conserved | conserved |
| HACD3    | 0.95204595 | 0.66009033 | conserved | conserved |
| HACD4    | 0.05065116 | 0.14352774 | conserved | conserved |

|        |            |            |           |           |
|--------|------------|------------|-----------|-----------|
| HACE1  | 0.79559542 | 0.13258166 | conserved | conserved |
| HADH   | 0.17096613 | 0.83442488 | conserved | conserved |
| HADHA  | 0.64982008 | 0.69186414 | conserved | conserved |
| HAGH   | 0.50107964 | 0.43028948 | conserved | conserved |
| HAL    | 0.00596762 | 0.00521172 | conserved | conserved |
| HAMP   | 0          | 0.00360344 | conserved | conserved |
| HAO1   | 0.00515153 | 0          | conserved | conserved |
| HAO2   | 0.00214062 | 0          | conserved | conserved |
| HAPLN1 | 0.31322696 | 0.29046714 | conserved | conserved |
| HAPLN3 | 0.14908716 | 0.1667776  | conserved | conserved |
| HAPLN4 | 0.02707357 | 0.01138028 | conserved | conserved |
| HARS2  | 0.22895101 | 0.16872569 | conserved | conserved |
| HAS2   | 0.00241272 | 0.23192824 | conserved | conserved |
| HAS3   | 0.02889773 | 0          | conserved | conserved |
| HAT1   | 0.69204109 | 0.33846376 | conserved | conserved |
| HAUS1  | 0.29985376 | 0.2209907  | conserved | conserved |
| HAUS2  | 0.18537898 | 0.30249686 | conserved | conserved |
| HAUS5  | 0.14818747 | 0.04712149 | conserved | conserved |
| HAUS6  | 0.18617937 | 0.0766709  | conserved | conserved |
| HAUS7  | 0.05594731 | 0.33663418 | conserved | conserved |
| HAUS8  | 0.08986971 | 0.15959494 | conserved | conserved |
| HAVCR2 | 0.05716112 | 0          | conserved | conserved |
| HAX1   | 0.22050281 | 0.64821277 | conserved | conserved |
| HBEGF  | 0.05728757 | 0.1382865  | conserved | conserved |
| HBP1   | 0.73002764 | 0.55962393 | conserved | conserved |
| HBS1L  | 0.75760516 | 0.40341569 | conserved | conserved |
| HCCS   | 0.03060588 | 0.46728232 | conserved | conserved |
| HCFC1  | 0.10130064 | 0.3174605  | conserved | conserved |
| HCK    | 0.03303513 | 0          | conserved | conserved |
| HCLS1  | 0.05027473 | 0          | conserved | conserved |
| HCN4   | 0.006914   | 0.00240927 | conserved | conserved |
| HCRT   | 0.01233712 | 0.01240236 | conserved | conserved |
| HCRTR1 | 0.01681792 | 0          | conserved | conserved |
| HCST   | 0.00171918 | 0.01211792 | conserved | conserved |
| HDAC10 | 0.48935227 | 0.12424022 | conserved | conserved |
| HDAC11 | 0.41809951 | 0.23857863 | conserved | conserved |
| HDAC2  | 0.42116294 | 1.23697766 | conserved | conserved |
| HDAC3  | 0.33110487 | 1.24777968 | conserved | conserved |
| HDAC4  | 3.12751093 | 0.34037894 | conserved | conserved |
| HDAC5  | 0.47118042 | 0.29159324 | conserved | conserved |
| HDAC6  | 0.28571509 | 0.17184671 | conserved | conserved |

|          |            |            |            |           |
|----------|------------|------------|------------|-----------|
| HDAC7    | 0.33988448 | 0.10469592 | conserved  | conserved |
| HDAC9    | 2.08351559 | 0.08403277 | conserved  | conserved |
| HDC      | 0.00361225 | 0.00783612 | conserved  | conserved |
| HDDC2    | 0.13195002 | 0.67031767 | conserved  | conserved |
| HDDC3    | 0.03966596 | 0.88177821 | conserved  | conserved |
| HDGF     | 0.16235491 | 1.86650348 | mouse-RGL  | conserved |
| HDHD3    | 0.09216615 | 0.1340171  | conserved  | conserved |
| HDLBP    | 0.81933359 | 0.58045538 | conserved  | conserved |
| HDX      | 0.48671846 | 0.02777012 | conserved  | conserved |
| HEATR1   | 0.33986935 | 0.00706236 | conserved  | conserved |
| HEATR3   | 0.62204802 | 0.27754309 | conserved  | conserved |
| HEATR5A  | 2.0329852  | 0.09376437 | monkey-NSC | conserved |
| HEATR5B  | 1.13577529 | 0.03836559 | conserved  | conserved |
| HEATR9   | 0.03553034 | 0          | conserved  | conserved |
| HEBP1    | 0.11615288 | 0.63273651 | conserved  | conserved |
| HECA     | 0.12536569 | 0.03408658 | conserved  | conserved |
| HECTD1   | 1.70891055 | 0.53193179 | conserved  | conserved |
| HECTD2   | 1.5909345  | 0.32782411 | conserved  | conserved |
| HECTD3   | 0.13263865 | 0.12580305 | conserved  | conserved |
| HECW1    | 0.67601266 | 0.13636831 | conserved  | conserved |
| HECW2    | 0.81360965 | 0.00187287 | conserved  | conserved |
| HEG1     | 0.62462765 | 0.19075264 | conserved  | conserved |
| HELB     | 0.1460097  | 0.03559142 | conserved  | conserved |
| HELLS    | 0.05458805 | 0.33668566 | conserved  | conserved |
| HELQ     | 0.78086134 | 0.03628692 | conserved  | conserved |
| HELZ     | 1.99591682 | 0.70644649 | conserved  | conserved |
| HEMGN    | 0.00718396 | 0          | conserved  | conserved |
| HEMK1    | 0.10904909 | 0.14620973 | conserved  | conserved |
| HENMT1   | 0.01605658 | 0.00786586 | conserved  | conserved |
| HEPACAM2 | 0.00536495 | 0.0029494  | conserved  | conserved |
| HEPH     | 1.00539913 | 0.01515471 | conserved  | conserved |
| HEPHL1   | 0.01059248 | 0          | conserved  | conserved |
| HERC1    | 2.45375484 | 0.64649442 | conserved  | conserved |
| HERC4    | 4.35687173 | 0.13001155 | monkey-NSC | conserved |
| HERC6    | 0.12912369 | 0.04823742 | conserved  | conserved |
| HERPUD1  | 0.26018657 | 0.24117667 | conserved  | conserved |
| HERPUD2  | 1.04054117 | 0.65737706 | conserved  | conserved |
| HES1     | 0.56284804 | 2.66144885 | mouse-RGL  | conserved |
| HES2     | 0.00565768 | 0          | conserved  | conserved |
| HES5     | 0.22779429 | 6.40215443 | mouse-RGL  | conserved |
| HES6     | 0.09539799 | 1.72221761 | mouse-RGL  | conserved |

|        |            |            |            |           |
|--------|------------|------------|------------|-----------|
| HES7   | 0.00115143 | 0.03070742 | conserved  | conserved |
| HESX1  | 0          | 0          | conserved  | conserved |
| HEXB   | 0.33902642 | 0.10163324 | conserved  | conserved |
| HEXIM1 | 0.02377047 | 0.56279102 | conserved  | conserved |
| HEXIM2 | 0.12533389 | 0.10026938 | conserved  | conserved |
| HEY1   | 0.12379262 | 0.50167071 | conserved  | conserved |
| HEY2   | 0.22570511 | 0.09222609 | conserved  | conserved |
| HEYL   | 0.15769593 | 0.04563237 | conserved  | conserved |
| HFE    | 0.05873498 | 0.0302023  | conserved  | conserved |
| HGD    | 0.03967421 | 0          | conserved  | conserved |
| HGF    | 0.05049862 | 0.02468148 | conserved  | conserved |
| HGFAC  | 0.00063555 | 0.00392832 | conserved  | conserved |
| HHAT   | 0.99250704 | 0.01581796 | conserved  | conserved |
| HHIP   | 0.34375067 | 0.0706267  | conserved  | conserved |
| HHIPL2 | 0          | 0          | conserved  | conserved |
| HIBADH | 2.53387415 | 1.025672   | conserved  | conserved |
| HIBCH  | 1.73233772 | 0.34098267 | conserved  | conserved |
| HIC2   | 0.03561433 | 0.0934068  | conserved  | conserved |
| HID1   | 0.20208848 | 0.05522783 | conserved  | conserved |
| HIF1A  | 1.37428861 | 0.69394722 | conserved  | conserved |
| HIF1AN | 0.11199191 | 0.07533872 | conserved  | conserved |
| HIF3A  | 1.25875325 | 0.02946584 | monkey-NSC | conserved |
| HIGD1C | 0.04080617 | 0          | conserved  | conserved |
| HINFP  | 0.10092797 | 0.009867   | conserved  | conserved |
| HINT2  | 0.04834138 | 0.8535681  | conserved  | conserved |
| HINT3  | 0.34761784 | 0.17552387 | conserved  | conserved |
| HIP1   | 6.88634849 | 0.44366818 | conserved  | conserved |
| HIP1R  | 1.03193084 | 0.21332664 | conserved  | conserved |
| HIPK1  | 0.36952093 | 0.45493043 | conserved  | conserved |
| HIPK2  | 2.2748595  | 0.53903349 | conserved  | conserved |
| HIPK3  | 0.75735892 | 0.12273255 | conserved  | conserved |
| HIPK4  | 0.00962063 | 0          | conserved  | conserved |
| HIRA   | 0.96013436 | 0.20495664 | conserved  | conserved |
| HIVEP1 | 2.19730553 | 0.32159353 | conserved  | conserved |
| HIVEP2 | 0.59350264 | 0.10674985 | conserved  | conserved |
| HIVEP3 | 0.90726338 | 0.75457542 | conserved  | conserved |
| HJURP  | 0.00659125 | 0.11727784 | conserved  | conserved |
| HK1    | 1.11020572 | 0.32267055 | conserved  | conserved |
| HK2    | 0.20601023 | 0.14477426 | conserved  | conserved |
| HK3    | 0.03412876 | 0          | conserved  | conserved |
| HKDC1  | 0.15681901 | 0.00483213 | conserved  | conserved |

|           |            |            |           |           |
|-----------|------------|------------|-----------|-----------|
| HLCS      | 1.95857552 | 0.0536621  | conserved | conserved |
| HLF       | 1.05264204 | 0.24386879 | conserved | conserved |
| HLTF      | 0.84981424 | 0.13632016 | conserved | conserved |
| HMBOX1    | 1.13355158 | 0.30994591 | conserved | conserved |
| HMBS      | 0.07685556 | 0.68153113 | conserved | conserved |
| HMCES     | 0.19015939 | 0.21479453 | conserved | conserved |
| HMCN1     | 0.43945111 | 0.01176838 | conserved | conserved |
| HMG20A    | 1.03955794 | 0.31991162 | conserved | conserved |
| HMGB4     | 0          | 0.00338606 | conserved | conserved |
| HMGCL     | 0.50130996 | 0.35830857 | conserved | conserved |
| HMGCR     | 0.48551442 | 0.8790596  | conserved | conserved |
| HMGCS1    | 0.26253406 | 4.10601485 | conserved | conserved |
| HMGCS2    | 0.02795155 | 0.04835225 | conserved | conserved |
| HMGN3     | 1.21876131 | 5.42096058 | conserved | conserved |
| HMGN5     | 0.36625367 | 0.32875922 | conserved | conserved |
| HMGXB3    | 0.51605268 | 0.07627082 | conserved | conserved |
| HMGXB4    | 0.69029647 | 0.28805102 | conserved | conserved |
| HMMR      | 0.04857022 | 0.00293592 | conserved | conserved |
| HMOX1     | 0.01811891 | 0.0565221  | conserved | conserved |
| HMOX2     | 0.29002881 | 0.53526887 | conserved | conserved |
| HMX1      | 0.00337078 | 0          | conserved | conserved |
| HNF1A     | 0.01253475 | 0          | conserved | conserved |
| HNF1B     | 0.01955799 | 0          | conserved | conserved |
| HNF4A     | 0          | 0          | conserved | conserved |
| HNF4G     | 0.01763619 | 0          | conserved | conserved |
| HNRNPA2B1 | 3.0493519  | 5.37382467 | conserved | conserved |
| HNRNPAB   | 0.14243343 | 2.75483059 | mouse-RGL | conserved |
| HNRNPDL   | 1.4882441  | 2.8540347  | conserved | conserved |
| HNRNPF    | 0.09472816 | 3.65743016 | mouse-RGL | conserved |
| HNRNPH1   | 0.58542358 | 1.63738177 | conserved | conserved |
| HNRNPH3   | 0.25628913 | 0.79614416 | conserved | conserved |
| HNRNPK    | 0.47645124 | 7.54193125 | mouse-RGL | conserved |
| HNRNPLL   | 0.70067677 | 0.55879854 | conserved | conserved |
| HNRNPM    | 1.09469355 | 1.39446444 | conserved | conserved |
| HNRNPR    | 0.57094762 | 2.2932565  | conserved | conserved |
| HNRNPU    | 1.37509859 | 2.53353791 | conserved | conserved |
| HNRNPUL1  | 0.51679603 | 0.85887373 | conserved | conserved |
| HOMER1    | 1.10226913 | 0.19150911 | conserved | conserved |
| HOMER2    | 0.81846565 | 0.46464189 | conserved | conserved |
| HOMEZ     | 0.09639894 | 0.0854395  | conserved | conserved |
| HOOK1     | 0.87288408 | 0.02804236 | conserved | conserved |



|          |            |            |            |           |
|----------|------------|------------|------------|-----------|
| HOOK3    | 3.74080184 | 0.71952379 | monkey-NSC | conserved |
| HOPX     | 2.88924239 | 4.80799775 | conserved  | conserved |
| HORMAD1  | 0.01779979 | 0          | conserved  | conserved |
| HORMAD2  | 0.29160702 | 0.00752246 | conserved  | conserved |
| HOXA10   | 0          | 0          | conserved  | conserved |
| HOXA7    | 0          | 0          | conserved  | conserved |
| HP1BP3   | 1.34664447 | 1.22210777 | conserved  | conserved |
| HPCA     | 0.21295242 | 0.11477031 | conserved  | conserved |
| HPCAL1   | 0.63258403 | 0.03532635 | conserved  | conserved |
| HPCAL4   | 0.20934824 | 0.09737431 | conserved  | conserved |
| HPD      | 0.00261728 | 0          | conserved  | conserved |
| HPDL     | 0.00143357 | 0.00748131 | conserved  | conserved |
| HPGD     | 0.00641491 | 0.01818996 | conserved  | conserved |
| HPGDS    | 0.03147966 | 0.15264463 | conserved  | conserved |
| HPN      | 0.06677616 | 0          | conserved  | conserved |
| HPS1     | 0.15702762 | 0.10759375 | conserved  | conserved |
| HPS3     | 0.26551288 | 0.07039061 | conserved  | conserved |
| HPS4     | 0.38346196 | 0.26049516 | conserved  | conserved |
| HPS5     | 0.37688073 | 0.16457765 | conserved  | conserved |
| HPSE     | 0.00644176 | 0.0048254  | conserved  | conserved |
| HPSE2    | 0.16409539 | 0          | conserved  | conserved |
| HR       | 0.01147036 | 0.01624459 | conserved  | conserved |
| HRAS     | 0.06867797 | 0.54895565 | mouse-RGL  | conserved |
| HRG      | 0          | 0          | conserved  | conserved |
| HRH1     | 0.80243616 | 0          | monkey-NSC | conserved |
| HRH2     | 0.05247583 | 0          | conserved  | conserved |
| HRH3     | 0.00550923 | 0          | conserved  | conserved |
| HRH4     | 0.05628752 | 0          | conserved  | conserved |
| HS3ST3A1 | 0.08471707 | 0.01257485 | conserved  | conserved |
| HS3ST6   | 0          | 0          | conserved  | conserved |
| HSBP1L1  | 0.08622586 | 0.00428878 | conserved  | conserved |
| HSD11B1  | 0.12154638 | 0.03083003 | conserved  | conserved |
| HSD11B2  | 0.01277467 | 0          | conserved  | conserved |
| HSD17B1  | 0.04342911 | 0          | conserved  | conserved |
| HSD17B10 | 0.03148761 | 1.73983442 | mouse-RGL  | conserved |
| HSD17B11 | 0.23420245 | 0.07966875 | conserved  | conserved |
| HSD17B12 | 1.41618018 | 1.30348634 | conserved  | conserved |
| HSD17B13 | 0.01887679 | 0          | conserved  | conserved |
| HSD17B2  | 0.00105164 | 0          | conserved  | conserved |
| HSD17B3  | 0.01342172 | 0          | conserved  | conserved |
| HSD17B4  | 1.03113652 | 0.49099982 | conserved  | conserved |

|         |            |            |            |           |
|---------|------------|------------|------------|-----------|
| HSD3B7  | 0.02813643 | 0.00607729 | conserved  | conserved |
| HSDL1   | 0.07002035 | 0.30403155 | conserved  | conserved |
| HSDL2   | 1.07616682 | 0.58833236 | conserved  | conserved |
| HSF1    | 0.39958092 | 0.19159305 | conserved  | conserved |
| HSF2    | 0.34006247 | 0.24306265 | conserved  | conserved |
| HSF2BP  | 0.10357298 | 0          | conserved  | conserved |
| HSF4    | 0.07945328 | 0          | conserved  | conserved |
| HSPA12A | 0.88011746 | 0.03066365 | conserved  | conserved |
| HSPA12B | 0.00191881 | 0          | conserved  | conserved |
| HSPA13  | 0.08774653 | 0.35534709 | conserved  | conserved |
| HSPA14  | 0.25219089 | 0.37711877 | conserved  | conserved |
| HSPA4L  | 0.63829166 | 0.70431393 | conserved  | conserved |
| HSPA5   | 0.39688394 | 1.52483792 | conserved  | conserved |
| HSPB3   | 0.0009705  | 0          | conserved  | conserved |
| HSPB8   | 0.11289975 | 0.27051367 | conserved  | conserved |
| HSPBAP1 | 0.27023231 | 0.01870936 | conserved  | conserved |
| HSPBP1  | 0.17231307 | 0.34980459 | conserved  | conserved |
| HSPG2   | 0.09427025 | 0.03191048 | conserved  | conserved |
| HSPH1   | 0.30683953 | 0.32824676 | conserved  | conserved |
| HTATSF1 | 0.12602946 | 0.38715008 | conserved  | conserved |
| HTR1B   | 0          | 0          | conserved  | conserved |
| HTR2A   | 0.10604558 | 0          | conserved  | conserved |
| HTR2B   | 0.0475318  | 0          | conserved  | conserved |
| HTR2C   | 0.16467935 | 0.00580422 | conserved  | conserved |
| HTR3A   | 0.00150439 | 0          | conserved  | conserved |
| HTR3B   | 0.00395969 | 0          | conserved  | conserved |
| HTR4    | 0.33004156 | 0          | conserved  | conserved |
| HTR5A   | 0.0106694  | 0          | conserved  | conserved |
| HTR6    | 0.02637808 | 0          | conserved  | conserved |
| HTRA1   | 2.37266347 | 1.06037305 | monkey-NSC | conserved |
| HTRA2   | 0.03651029 | 0.35424082 | conserved  | conserved |
| HTRA3   | 0          | 0.05063625 | conserved  | conserved |
| HTT     | 1.61859075 | 0.30023208 | conserved  | conserved |
| HUNK    | 0.45706276 | 0.0995878  | conserved  | conserved |
| HUWE1   | 2.43310147 | 1.04548589 | conserved  | conserved |
| HVCN1   | 0.36567151 | 0.00624884 | conserved  | conserved |
| HYAL1   | 0.01768257 | 0.20775609 | conserved  | conserved |
| HYAL2   | 0.03039476 | 0.20814202 | conserved  | conserved |
| HYAL3   | 0.01645036 | 0.03080153 | conserved  | conserved |
| HYAL4   | 0          | 0          | conserved  | conserved |
| HYDIN   | 0.26665268 | 0          | conserved  | conserved |

|        |            |            |            |           |
|--------|------------|------------|------------|-----------|
| HYKK   | 0.18437321 | 0.0675904  | conserved  | conserved |
| HYLS1  | 0.03583947 | 0.01725831 | conserved  | conserved |
| HYOU1  | 0.11450223 | 0.11522089 | conserved  | conserved |
| HYPK   | 0.03226361 | 1.0862212  | mouse-RGL  | conserved |
| IAH1   | 0.20353782 | 0.40992758 | conserved  | conserved |
| IAPP   | 0.01544436 | 0          | conserved  | conserved |
| IARS2  | 0.55198926 | 0.18322104 | conserved  | conserved |
| IBSP   | 0.00231423 | 0.00182916 | conserved  | conserved |
| IBTK   | 1.09300976 | 0.18599869 | conserved  | conserved |
| ICA1   | 0.36427599 | 0.03539005 | conserved  | conserved |
| ICA1L  | 1.16393668 | 0.03387346 | conserved  | conserved |
| ICAM1  | 0.01941254 | 0.02822612 | conserved  | conserved |
| ICAM2  | 0          | 0.00312584 | conserved  | conserved |
| ICAM4  | 0.0011083  | 0          | conserved  | conserved |
| ICAM5  | 0.025304   | 0.01217202 | conserved  | conserved |
| ICE1   | 0.86922334 | 0.20162059 | conserved  | conserved |
| ICE2   | 0.4076726  | 0.11672557 | conserved  | conserved |
| ICMT   | 0.071278   | 0.07250041 | conserved  | conserved |
| ICOS   | 0          | 0          | conserved  | conserved |
| ID1    | 0.07275427 | 1.90353351 | mouse-RGL  | conserved |
| ID2    | 0.64285397 | 3.3423812  | mouse-RGL  | conserved |
| ID3    | 0.16181821 | 6.50098413 | mouse-RGL  | conserved |
| ID4    | 1.44550559 | 2.49472268 | monkey-NSC | conserved |
| IDE    | 0.76257695 | 0.50706512 | conserved  | conserved |
| IDH1   | 0.552779   | 1.88305615 | conserved  | conserved |
| IDH2   | 0.8880819  | 1.51131749 | conserved  | conserved |
| IDH3B  | 0.09377206 | 0.53411834 | conserved  | conserved |
| IDI1   | 0.49596147 | 1.31822822 | conserved  | conserved |
| IDNK   | 0.45229939 | 0.6161271  | conserved  | conserved |
| IER3   | 0.0182654  | 0.04822038 | conserved  | conserved |
| IFFO1  | 0.41321478 | 0.19105663 | conserved  | conserved |
| IFI30  | 0.00635323 | 0.04431619 | conserved  | conserved |
| IFI35  | 0.07690716 | 0.02808799 | conserved  | conserved |
| IFI44  | 0.03886996 | 0          | conserved  | conserved |
| IFI44L | 0.01386071 | 0          | conserved  | conserved |
| IFIT2  | 0.04195919 | 0.05315159 | conserved  | conserved |
| IFNAR1 | 0.44380589 | 0.23696342 | conserved  | conserved |
| IFNG   | 0          | 0          | conserved  | conserved |
| IFNGR1 | 0.25361013 | 0.13828408 | conserved  | conserved |
| IFNGR2 | 0.43319705 | 0.65205554 | conserved  | conserved |
| IFNLR1 | 0.00855938 | 0          | conserved  | conserved |

|         |            |            |           |           |
|---------|------------|------------|-----------|-----------|
| IFT122  | 0.42902485 | 0.17538591 | conserved | conserved |
| IFT140  | 0.73180821 | 0.10473908 | conserved | conserved |
| IFT172  | 0.66308351 | 0.08464688 | conserved | conserved |
| IFT22   | 0.09186308 | 0.8537792  | conserved | conserved |
| IFT27   | 0.6245143  | 1.01172799 | conserved | conserved |
| IFT43   | 0.92488327 | 0.43699901 | conserved | conserved |
| IFT46   | 0.11328721 | 0.4028083  | conserved | conserved |
| IFT52   | 0.2451572  | 0.24500344 | conserved | conserved |
| IFT57   | 0.46420002 | 0.80311016 | conserved | conserved |
| IFT74   | 1.38166731 | 0.41078395 | conserved | conserved |
| IFT80   | 0.92375134 | 0.20026143 | conserved | conserved |
| IFT81   | 0.57089478 | 0.35928591 | conserved | conserved |
| IFT88   | 1.30571335 | 0.06907823 | conserved | conserved |
| IGDCC3  | 0.38169923 | 0.04543114 | conserved | conserved |
| IGDCC4  | 0.55567903 | 0.7980728  | conserved | conserved |
| IGF1    | 0.10456178 | 0.01795109 | conserved | conserved |
| IGF1R   | 2.0756257  | 0.96191795 | conserved | conserved |
| IGF2    | 0.00700601 | 0.00343309 | conserved | conserved |
| IGF2BP1 | 0.0323633  | 0.03606712 | conserved | conserved |
| IGF2BP2 | 0.08996689 | 0.02296098 | conserved | conserved |
| IGF2R   | 0.39828236 | 0.08191568 | conserved | conserved |
| IGFALS  | 0.00267271 | 0          | conserved | conserved |
| IGFBP1  | 0.00105629 | 0          | conserved | conserved |
| IGFBP2  | 0.04170416 | 0.77931622 | conserved | conserved |
| IGFBP3  | 0.01256973 | 0.01602177 | conserved | conserved |
| IGFBP4  | 0.00142699 | 0.22696676 | conserved | conserved |
| IGFBP5  | 0.30133041 | 0.96501404 | conserved | conserved |
| IGFBP7  | 0.08292415 | 0.05670902 | conserved | conserved |
| IGSF1   | 0.10593064 | 0.02071884 | conserved | conserved |
| IGSF10  | 0.05450987 | 0.06508871 | conserved | conserved |
| IGSF11  | 3.4302666  | 0.34908177 | conserved | conserved |
| IGSF21  | 0.05420063 | 0.091417   | conserved | conserved |
| IGSF23  | 0.00645017 | 0          | conserved | conserved |
| IGSF3   | 0.04893732 | 0.89959454 | mouse-RGL | conserved |
| IGSF6   | 0.1191241  | 0          | conserved | conserved |
| IGSF8   | 0.11961236 | 0.66279708 | conserved | conserved |
| IGSF9   | 0.0231055  | 0.04716015 | conserved | conserved |
| IGSF9B  | 0.04264208 | 0          | conserved | conserved |
| IHH     | 0.00131189 | 0.00286396 | conserved | conserved |
| IK      | 0.21976048 | 0.51534033 | conserved | conserved |
| IKBKB   | 1.3325811  | 0.40873896 | conserved | conserved |

|          |            |            |           |           |
|----------|------------|------------|-----------|-----------|
| IKBKE    | 0.00400384 | 0.00296436 | conserved | conserved |
| IKBKG    | 0.28745693 | 0.14712058 | conserved | conserved |
| IKZF3    | 0.04449516 | 0          | conserved | conserved |
| IKZF4    | 0.22791691 | 0.04778323 | conserved | conserved |
| IKZF5    | 0.11642637 | 0.53730021 | conserved | conserved |
| IL10     | 0          | 0          | conserved | conserved |
| IL10RA   | 0.01662906 | 0          | conserved | conserved |
| IL11     | 0.00101555 | 0.02258468 | conserved | conserved |
| IL12A    | 0          | 0          | conserved | conserved |
| IL12B    | 0          | 0          | conserved | conserved |
| IL12RB1  | 0.0132904  | 0.00533621 | conserved | conserved |
| IL12RB2  | 0.14437997 | 0          | conserved | conserved |
| IL13RA2  | 0          | 0          | conserved | conserved |
| IL15     | 0.00213934 | 0          | conserved | conserved |
| IL15RA   | 0.03566997 | 0.01796965 | conserved | conserved |
| IL16     | 0.15476021 | 0.00371918 | conserved | conserved |
| IL17B    | 0          | 0.00776358 | conserved | conserved |
| IL17C    | 0          | 0          | conserved | conserved |
| IL17F    | 0.0194702  | 0          | conserved | conserved |
| IL17RD   | 0.34985774 | 0.11260087 | conserved | conserved |
| IL17RE   | 0.02717972 | 0.00357637 | conserved | conserved |
| IL18R1   | 0.0054688  | 0          | conserved | conserved |
| IL18RAP  | 0          | 0          | conserved | conserved |
| IL19     | 0.00481051 | 0          | conserved | conserved |
| IL1A     | 0.00727809 | 0          | conserved | conserved |
| IL1B     | 0.00445693 | 0          | conserved | conserved |
| IL1R1    | 0.01505784 | 0.00212349 | conserved | conserved |
| IL1R2    | 0.00174722 | 0.0132224  | conserved | conserved |
| IL1RAP   | 0.63367801 | 0.06770752 | conserved | conserved |
| IL1RAPL1 | 9.25986592 | 0.07773564 | conserved | conserved |
| IL1RAPL2 | 0.43368253 | 0          | conserved | conserved |
| IL1RL1   | 0.00069265 | 0          | conserved | conserved |
| IL1RL2   | 0.00925707 | 0          | conserved | conserved |
| IL1RN    | 0          | 0          | conserved | conserved |
| IL20     | 0          | 0          | conserved | conserved |
| IL20RA   | 0.08665194 | 0.00325899 | conserved | conserved |
| IL20RB   | 0.00847337 | 0.01445597 | conserved | conserved |
| IL21     | 0          | 0          | conserved | conserved |
| IL21R    | 0.00858262 | 0          | conserved | conserved |
| IL22RA2  | 0.01006739 | 0          | conserved | conserved |
| IL23A    | 0.01309264 | 0          | conserved | conserved |

|        |            |            |            |                      |
|--------|------------|------------|------------|----------------------|
| IL23R  | 0.0055945  | 0          | conserved  | conserved            |
| IL24   | 0.0009884  | 0          | conserved  | conserved            |
| IL25   | 0.01366897 | 0.00296436 | conserved  | conserved            |
| IL27   | 0          | 0          | conserved  | conserved            |
| IL27RA | 0.05852092 | 0.00243806 | conserved  | conserved            |
| IL2RA  | 0.00261601 | 0          | conserved  | conserved            |
| IL2RB  | 0          | 0          | conserved  | conserved            |
| IL31   | 0          | 0          | conserved  | conserved            |
| IL31RA | 0.01110836 | 0.00679607 | conserved  | conserved            |
| IL33   | 0.22430296 | 0.01097821 | conserved  | conserved            |
| IL34   | 0.12882731 | 0.01925013 | conserved  | conserved            |
| IL411  | 0.02434709 | 0          | conserved  | conserved            |
| IL5RA  | 0.0056645  | 0          | conserved  | conserved            |
| IL6    | 0.02172683 | 0.00945804 | conserved  | conserved            |
| IL7    | 0.05731261 | 0          | conserved  | conserved            |
| IL7R   | 0.00161353 | 0          | conserved  | conserved            |
| IL9    | 0.00395108 | 0          | conserved  | conserved            |
| ILD1R1 | 0.00115873 | 0.00347391 | conserved  | conserved            |
| ILD1R2 | 0.34221808 | 0.54834604 | conserved  | conserved            |
| ILF3   | 0.53028457 | 0.50826593 | conserved  | conserved            |
| ILK    | 0.73059456 | 0.97630294 | conserved  | conserved            |
| ILKAP  | 0.92728596 | 0.85443436 | conserved  | conserved            |
| ILVBL  | 0.2815174  | 0.24813788 | conserved  | conserved            |
| IMMP1L | 0.22036968 | 1.82360824 | mouse-RGL  | conserved            |
| IMMP2L | 2.23021808 | 0.06316184 | monkey-NSC | monkey-NSC1-enriched |
| IMMT   | 0.66162525 | 0.71943012 | conserved  | conserved            |
| IMP3   | 0.00099314 | 0.62791315 | conserved  | conserved            |
| IMP4   | 0.06548828 | 0.42289014 | conserved  | conserved            |
| IMPG2  | 0.02732742 | 0.00244921 | conserved  | conserved            |
| INCA1  | 0.01808965 | 0.03821795 | conserved  | conserved            |
| INCENP | 0.02811865 | 0.0405806  | conserved  | conserved            |
| ING1   | 0.02876839 | 0.4513811  | conserved  | conserved            |
| ING2   | 0.11862502 | 0.29096546 | conserved  | conserved            |
| ING3   | 0.21325434 | 0.29243748 | conserved  | conserved            |
| ING4   | 0.33440257 | 0.63226973 | conserved  | conserved            |
| ING5   | 0.38483753 | 0.08808545 | conserved  | conserved            |
| INHA   | 0.03360809 | 0.06599896 | conserved  | conserved            |
| INHBB  | 0.13313903 | 0.2741171  | conserved  | conserved            |
| INHBE  | 0          | 0          | conserved  | conserved            |
| INO80  | 1.22647787 | 0.12724254 | conserved  | conserved            |
| INO80E | 0.20181164 | 0.49120817 | conserved  | conserved            |

|        |            |            |            |           |
|--------|------------|------------|------------|-----------|
| INPP4A | 1.30692506 | 0.17252606 | conserved  | conserved |
| INPP4B | 0.57742526 | 0.01136032 | conserved  | conserved |
| INPP5A | 0.42957991 | 0.03742614 | conserved  | conserved |
| INPP5B | 0.85255882 | 0.09510128 | conserved  | conserved |
| INPP5D | 0.09811378 | 0.01391926 | conserved  | conserved |
| INPP5E | 0.12995969 | 0.07982246 | conserved  | conserved |
| INPP5F | 1.02359448 | 0.47664245 | conserved  | conserved |
| INPP5J | 0.05913478 | 0.04218029 | conserved  | conserved |
| INPP5K | 0.36113954 | 0.13956204 | conserved  | conserved |
| INPPL1 | 1.13381482 | 0.32097978 | conserved  | conserved |
| INSC   | 0.0018708  | 0.02196663 | conserved  | conserved |
| INSIG1 | 0.36809887 | 1.21463475 | conserved  | conserved |
| INSIG2 | 0.18941876 | 0.44954631 | conserved  | conserved |
| INSM2  | 0          | 0.00363431 | conserved  | conserved |
| INSR   | 1.24306938 | 0.17244582 | conserved  | conserved |
| INTS12 | 0.19034218 | 0.1127525  | conserved  | conserved |
| INTS2  | 0.78091405 | 0.32144692 | conserved  | conserved |
| INTS3  | 0.89957386 | 0.25503996 | conserved  | conserved |
| INTS4  | 0.62902065 | 0.17974084 | conserved  | conserved |
| INTS7  | 0.27710003 | 0.17920168 | conserved  | conserved |
| INTS8  | 0.85224752 | 0.07353914 | conserved  | conserved |
| INTS9  | 0.84888473 | 0.07351809 | conserved  | conserved |
| INVS   | 1.94940705 | 0.19231672 | monkey-NSC | conserved |
| IP6K1  | 1.02218634 | 0.45633068 | conserved  | conserved |
| IP6K2  | 0.52814654 | 0.65587722 | conserved  | conserved |
| IP6K3  | 0.00682973 | 0.00540289 | conserved  | conserved |
| IPCEF1 | 0.76647884 | 0.00379047 | monkey-NSC | conserved |
| IPMK   | 0.46293237 | 0.15318966 | conserved  | conserved |
| IPO11  | 1.2649769  | 0.18266369 | conserved  | conserved |
| IPO13  | 0.10636652 | 0.19323554 | conserved  | conserved |
| IPO4   | 0.07513003 | 0.252165   | conserved  | conserved |
| IPO5   | 0.36389872 | 0.56632734 | conserved  | conserved |
| IPO7   | 0.42152897 | 0.54168805 | conserved  | conserved |
| IPO8   | 0.67482544 | 0.27975586 | conserved  | conserved |
| IPO9   | 1.08203323 | 0.33112383 | conserved  | conserved |
| IPP    | 0.44205038 | 0.05098657 | conserved  | conserved |
| IPPK   | 0.35711058 | 0.07186312 | conserved  | conserved |
| IQCB1  | 0.77170799 | 0.31728095 | conserved  | conserved |
| IQCC   | 0.02913733 | 0.42082448 | conserved  | conserved |
| IQCD   | 0.03903482 | 0.01094521 | conserved  | conserved |
| IQCF1  | 0.00302384 | 0          | conserved  | conserved |

|          |            |            |            |           |
|----------|------------|------------|------------|-----------|
| IQCF5    | 0          | 0          | conserved  | conserved |
| IQCG     | 0.25752478 | 0.05991032 | conserved  | conserved |
| IQCH     | 0.07183437 | 0.02615849 | conserved  | conserved |
| IQCK     | 3.33193795 | 0.09484038 | conserved  | conserved |
| IQGAP1   | 1.69104872 | 0.33335133 | conserved  | conserved |
| IQGAP2   | 0.57569238 | 0.14947808 | conserved  | conserved |
| IQGAP3   | 0.00227515 | 0.00511479 | conserved  | conserved |
| IQSEC1   | 1.23284696 | 0.50899665 | conserved  | conserved |
| IQSEC2   | 0.81628464 | 0.10906781 | conserved  | conserved |
| IQUB     | 0.35748716 | 0.05301094 | conserved  | conserved |
| IRAK1    | 0.08070333 | 0.46939863 | conserved  | conserved |
| IRAK1BP1 | 0.56204571 | 0.34182803 | conserved  | conserved |
| IRAK2    | 0.53128788 | 0.06081391 | monkey-NSC | conserved |
| IRAK3    | 0.74473923 | 0          | conserved  | conserved |
| IRAK4    | 0.11326406 | 0.03603725 | conserved  | conserved |
| IREB2    | 0.62733447 | 0.31165314 | conserved  | conserved |
| IRF2     | 1.05939126 | 0.21619558 | conserved  | conserved |
| IRF3     | 0.05555032 | 0.45421408 | conserved  | conserved |
| IRF4     | 0.00148568 | 0          | conserved  | conserved |
| IRF5     | 0.02064931 | 0          | conserved  | conserved |
| IRF6     | 0.00696419 | 0          | conserved  | conserved |
| IRF7     | 0.01604215 | 0.00487526 | conserved  | conserved |
| IRF8     | 0.00694743 | 0.00919706 | conserved  | conserved |
| IRF9     | 0.13965005 | 0.10328385 | conserved  | conserved |
| IRS1     | 0.07232024 | 0.26301233 | conserved  | conserved |
| IRS4     | 0.00090465 | 0.00467569 | conserved  | conserved |
| IRX1     | 0.01118575 | 0          | conserved  | conserved |
| IRX2     | 0.0084504  | 0          | conserved  | conserved |
| IRX3     | 0.04527787 | 0          | conserved  | conserved |
| IRX4     | 0          | 0          | conserved  | conserved |
| IRX5     | 0.00080837 | 0          | conserved  | conserved |
| IRX6     | 0          | 0          | conserved  | conserved |
| ISCA2    | 0.04258299 | 0.71761425 | conserved  | conserved |
| ISG15    | 0.00539905 | 0.00465706 | conserved  | conserved |
| ISLR     | 0.00143689 | 0.43309512 | conserved  | conserved |
| ISLR2    | 0.05987583 | 0.16655084 | conserved  | conserved |
| ISM1     | 0.04911565 | 0          | conserved  | conserved |
| ISM2     | 0.01061181 | 0          | conserved  | conserved |
| ISOC1    | 0.09241994 | 0.57840899 | mouse-RGL  | conserved |
| ISYNA1   | 0.01151557 | 0.0942915  | conserved  | conserved |
| ITCH     | 1.50840286 | 0.47341317 | conserved  | conserved |



|          |            |            |            |                      |
|----------|------------|------------|------------|----------------------|
| ITFG1    | 4.38794747 | 0.78443965 | conserved  | conserved            |
| ITFG2    | 1.33779367 | 0.31439235 | conserved  | conserved            |
| ITGA1    | 0.01957211 | 0.01730533 | conserved  | conserved            |
| ITGA11   | 0.21018129 | 0.00308903 | conserved  | conserved            |
| ITGA2    | 0.1683432  | 0.00753346 | conserved  | conserved            |
| ITGA2B   | 0.308264   | 0.04930908 | conserved  | conserved            |
| ITGA3    | 0.04937836 | 0.01400936 | conserved  | conserved            |
| ITGA4    | 0.04913796 | 0.00540289 | conserved  | conserved            |
| ITGA6    | 2.20347656 | 0.39685541 | monkey-NSC | conserved            |
| ITGA8    | 0.90553888 | 0          | monkey-NSC | monkey-NSC1-enriched |
| ITGA9    | 0.38934355 | 0.02638505 | conserved  | conserved            |
| ITGAE    | 0.31075245 | 0.03098101 | conserved  | conserved            |
| ITGAV    | 1.86382347 | 0.64118744 | monkey-NSC | conserved            |
| ITGB1    | 0.5062231  | 0.86322103 | conserved  | conserved            |
| ITGB1BP2 | 0.01055594 | 0          | conserved  | conserved            |
| ITGB4    | 4.29375834 | 0.00823473 | monkey-NSC | monkey-NSC1-enriched |
| ITGB5    | 1.17299266 | 0.40917306 | conserved  | conserved            |
| ITGB6    | 0.00469916 | 0          | conserved  | conserved            |
| ITGB7    | 0.0130859  | 0          | conserved  | conserved            |
| ITGB8    | 1.37745843 | 0.91979089 | conserved  | conserved            |
| ITGBL1   | 0.10735692 | 0.00228669 | conserved  | conserved            |
| ITIH1    | 0          | 0          | conserved  | conserved            |
| ITIH2    | 0.01057042 | 0          | conserved  | conserved            |
| ITIH3    | 0.00291527 | 1.26127979 | conserved  | conserved            |
| ITIH4    | 0.00934186 | 0          | conserved  | conserved            |
| ITIH5    | 0.03807854 | 0.16506807 | conserved  | conserved            |
| ITK      | 0.0077186  | 0          | conserved  | conserved            |
| ITLN1    | 0          | 0          | conserved  | conserved            |
| ITM2A    | 0.01794071 | 0.11368535 | conserved  | conserved            |
| ITM2B    | 1.33466082 | 10.6937879 | conserved  | conserved            |
| ITM2C    | 0.98811069 | 2.3967232  | conserved  | conserved            |
| ITPA     | 0.17845857 | 0.62936063 | conserved  | conserved            |
| ITPK1    | 2.17737855 | 0.22205099 | conserved  | conserved            |
| ITPKA    | 0.17245217 | 0.04209172 | conserved  | conserved            |
| ITPKB    | 1.70359881 | 0.19810795 | monkey-NSC | conserved            |
| ITPR1    | 0.65875953 | 0.04693375 | conserved  | conserved            |
| ITPR2    | 9.21045189 | 0.21436922 | monkey-NSC | conserved            |
| ITPR3    | 0.00646625 | 0          | conserved  | conserved            |
| ITSN1    | 4.05470289 | 0.44367253 | monkey-NSC | conserved            |
| ITSN2    | 1.95916259 | 0.10161043 | monkey-NSC | conserved            |
| IVD      | 1.42119956 | 0.35517916 | conserved  | conserved            |

|          |            |            |            |           |
|----------|------------|------------|------------|-----------|
| IVNS1ABP | 0.23356859 | 0.84035226 | conserved  | conserved |
| IWS1     | 0.4408989  | 0.31697769 | conserved  | conserved |
| IYD      | 0.00168832 | 0.00322529 | conserved  | conserved |
| IZUMO1   | 0.0184666  | 0          | conserved  | conserved |
| IZUMO1R  | 0          | 0          | conserved  | conserved |
| IZUMO2   | 0.02069991 | 0          | conserved  | conserved |
| IZUMO4   | 0.07172497 | 0.25756899 | conserved  | conserved |
| JADE1    | 0.19275618 | 0.13030215 | conserved  | conserved |
| JADE3    | 0.20046927 | 0.02284178 | conserved  | conserved |
| JAG1     | 0.11158605 | 0.37740869 | conserved  | conserved |
| JAGN1    | 0.07140955 | 0.46928234 | conserved  | conserved |
| JAK1     | 0.90414262 | 0.66756455 | conserved  | conserved |
| JAK2     | 0.6163067  | 0.22290329 | conserved  | conserved |
| JAKMIP1  | 4.1255783  | 0.34330957 | monkey-NSC | conserved |
| JAKMIP2  | 3.19045751 | 0.13699781 | conserved  | conserved |
| JAKMIP3  | 0.15578188 | 0.01371212 | conserved  | conserved |
| JAM2     | 0.73029137 | 0.48463002 | conserved  | conserved |
| JAM3     | 0.51166088 | 0.65127588 | conserved  | conserved |
| JARID2   | 4.71959371 | 0.41456197 | monkey-NSC | conserved |
| JAZF1    | 0.63885193 | 0.00345505 | conserved  | conserved |
| JCHAIN   | 0.04433817 | 0          | conserved  | conserved |
| JDP2     | 0.35002813 | 0.00420598 | conserved  | conserved |
| JMJD1C   | 8.23270661 | 0.6611243  | conserved  | conserved |
| JMJD6    | 0.15755771 | 0.28201254 | conserved  | conserved |
| JMJD8    | 0.00481801 | 0.30248874 | conserved  | conserved |
| JMY      | 0.75974769 | 0.26419934 | conserved  | conserved |
| JOSD1    | 0.21099256 | 0.22316129 | conserved  | conserved |
| JOSD2    | 0.06334559 | 0.62570642 | conserved  | conserved |
| JRK      | 0.15409938 | 0.06711616 | conserved  | conserved |
| JRKL     | 0.02422244 | 0.105378   | conserved  | conserved |
| JUP      | 0.01197016 | 0.08977299 | conserved  | conserved |
| KALRN    | 11.7778986 | 0.21690398 | conserved  | conserved |
| KANK1    | 3.37239737 | 0.02460828 | conserved  | conserved |
| KANK2    | 0.39689053 | 0.08365664 | conserved  | conserved |
| KANSL1   | 4.43643015 | 0.41025633 | conserved  | conserved |
| KANSL2   | 0.32213489 | 0.87960285 | conserved  | conserved |
| KANSL3   | 0.86755474 | 0.3651682  | conserved  | conserved |
| KAT2B    | 3.049033   | 0.17358313 | conserved  | conserved |
| KAT5     | 0.17441311 | 0.25724861 | conserved  | conserved |
| KAT6A    | 1.98596771 | 0.30213663 | conserved  | conserved |
| KAT6B    | 4.13847977 | 0.8018429  | conserved  | conserved |

|         |            |            |            |                      |
|---------|------------|------------|------------|----------------------|
| KAT7    | 0.54192713 | 0.24056258 | conserved  | conserved            |
| KAT8    | 0.22957916 | 0.14400334 | conserved  | conserved            |
| KATNA1  | 0.410302   | 0.23154187 | conserved  | conserved            |
| KATNAL1 | 0.75450313 | 0.26915663 | conserved  | conserved            |
| KATNAL2 | 0.20196505 | 0.08024375 | conserved  | conserved            |
| KATNB1  | 0.0663462  | 0.23271072 | conserved  | conserved            |
| KATNBL1 | 1.84541008 | 0.52700634 | conserved  | conserved            |
| KAZALD1 | 0.0060062  | 0.00269918 | conserved  | conserved            |
| KBTBD12 | 2.0889014  | 0          | monkey-NSC | monkey-NSC1-enriched |
| KBTBD2  | 0.21103899 | 0.23276702 | conserved  | conserved            |
| KBTBD3  | 0.13556119 | 0.15894451 | conserved  | conserved            |
| KBTBD4  | 0.06552765 | 0.18049981 | conserved  | conserved            |
| KBTBD7  | 0.02218893 | 0.18549351 | conserved  | conserved            |
| KCMF1   | 0.65729483 | 0.3397559  | conserved  | conserved            |
| KCNA1   | 0.06796943 | 0.01364615 | conserved  | conserved            |
| KCNA2   | 0.29660147 | 0.29419367 | conserved  | conserved            |
| KCNA3   | 0.15343488 | 0          | conserved  | conserved            |
| KCNAB1  | 0.84323443 | 0.11503691 | conserved  | conserved            |
| KCNAB2  | 0.38281425 | 0.10299427 | conserved  | conserved            |
| KCNAB3  | 0.02548934 | 0.00665548 | conserved  | conserved            |
| KCNB1   | 0.44230695 | 0.28730414 | conserved  | conserved            |
| KCNC1   | 0.13419681 | 0.13624658 | conserved  | conserved            |
| KCNC2   | 1.96691143 | 0.01680827 | monkey-NSC | conserved            |
| KCNC4   | 0.14774717 | 0.01659061 | conserved  | conserved            |
| KCND2   | 4.14437444 | 0.12320364 | monkey-NSC | conserved            |
| KCNE3   | 0.00217245 | 0          | conserved  | conserved            |
| KCNE4   | 0.05619597 | 0.00742922 | conserved  | conserved            |
| KCNG4   | 0.00626914 | 0          | conserved  | conserved            |
| KCNH1   | 3.06729836 | 0          | monkey-NSC | conserved            |
| KCNH2   | 0.06101279 | 0.00574807 | conserved  | conserved            |
| KCNH3   | 0.07624254 | 0.04274512 | conserved  | conserved            |
| KCNH4   | 0.14370785 | 0          | conserved  | conserved            |
| KCNH5   | 1.06221473 | 0.00248184 | monkey-NSC | conserved            |
| KCNH6   | 0.00602304 | 0          | conserved  | conserved            |
| KCNH7   | 1.17163492 | 0.13537616 | conserved  | conserved            |
| KCNH8   | 0.27524743 | 0          | conserved  | conserved            |
| KCNIP1  | 4.24591826 | 0.41589475 | conserved  | conserved            |
| KCNIP2  | 0.3449583  | 0.03454024 | conserved  | conserved            |
| KCNIP4  | 18.6452419 | 0.0282524  | monkey-NSC | conserved            |
| KCNJ1   | 0.01665064 | 0          | conserved  | conserved            |
| KCNJ14  | 0.03050715 | 0          | conserved  | conserved            |

|        |            |            |            |           |
|--------|------------|------------|------------|-----------|
| KCNJ15 | 0          | 0          | conserved  | conserved |
| KCNJ16 | 0.05550098 | 0.2452748  | conserved  | conserved |
| KCNJ2  | 0.07731555 | 0          | conserved  | conserved |
| KCNJ3  | 1.99167538 | 0.03705051 | monkey-NSC | conserved |
| KCNJ5  | 0.0016088  | 0          | conserved  | conserved |
| KCNJ6  | 1.31680776 | 0.00773101 | conserved  | conserved |
| KCNJ8  | 0.00828254 | 0          | conserved  | conserved |
| KCNK1  | 0.86550554 | 0.18294156 | monkey-NSC | conserved |
| KCNK10 | 0.16822536 | 0.05869543 | conserved  | conserved |
| KCNK13 | 0.01400495 | 0.01564037 | conserved  | conserved |
| KCNK16 | 0          | 0          | conserved  | conserved |
| KCNK2  | 0.06991185 | 1.12025853 | conserved  | conserved |
| KCNK3  | 0.01675021 | 0.01192649 | conserved  | conserved |
| KCNK4  | 0.11789152 | 0          | conserved  | conserved |
| KCNK5  | 0.00276815 | 0.01083739 | conserved  | conserved |
| KCNK7  | 0.00074462 | 0.0201794  | conserved  | conserved |
| KCNK9  | 0.00868386 | 0          | conserved  | conserved |
| KCNMA1 | 2.05816007 | 0.01437341 | monkey-NSC | conserved |
| KCNMB1 | 0.07920185 | 0          | conserved  | conserved |
| KCNMB3 | 0.13892811 | 0          | conserved  | conserved |
| KCNMB4 | 0.58602292 | 0.26388609 | conserved  | conserved |
| KCNN1  | 0.07561785 | 0.04744266 | conserved  | conserved |
| KCNN2  | 0.87939358 | 1.40724846 | conserved  | conserved |
| KCNN3  | 0.8107043  | 0.05681603 | conserved  | conserved |
| KCNN4  | 0.01997492 | 0.00105521 | conserved  | conserved |
| KCNQ1  | 0.05694761 | 0          | conserved  | conserved |
| KCNQ3  | 3.15092352 | 0.21618742 | monkey-NSC | conserved |
| KCNQ4  | 0.06950348 | 0.09489538 | conserved  | conserved |
| KCNQ5  | 4.70581815 | 0.04079085 | monkey-NSC | conserved |
| KCNRG  | 0.06351578 | 0          | conserved  | conserved |
| KCNS2  | 0.01243174 | 0          | conserved  | conserved |
| KCNS3  | 0.00964462 | 0.01288705 | conserved  | conserved |
| KCNT2  | 2.2330805  | 0.02314665 | monkey-NSC | conserved |
| KCNU1  | 0.00075056 | 0.02709255 | conserved  | conserved |
| KCNV1  | 0.00288452 | 0          | conserved  | conserved |
| KCNV2  | 0.01137276 | 0          | conserved  | conserved |
| KCP    | 0.01755629 | 0.02509145 | conserved  | conserved |
| KCTD10 | 0.12900743 | 0.13139387 | conserved  | conserved |
| KCTD13 | 0.36710777 | 0.30896513 | conserved  | conserved |
| KCTD16 | 5.35461462 | 0          | monkey-NSC | conserved |
| KCTD17 | 0.21414854 | 0.02456351 | conserved  | conserved |

|           |            |            |            |           |
|-----------|------------|------------|------------|-----------|
| KCTD18    | 0.38834959 | 0.13850114 | conserved  | conserved |
| KCTD19    | 0.00440108 | 0          | conserved  | conserved |
| KCTD2     | 0.18046202 | 0.11242281 | conserved  | conserved |
| KCTD20    | 0.29256629 | 0.23199856 | conserved  | conserved |
| KCTD21    | 0.15731395 | 0.06200164 | conserved  | conserved |
| KCTD4     | 0.0056987  | 0.25560734 | conserved  | conserved |
| KCTD6     | 0.32209412 | 0.12731939 | conserved  | conserved |
| KCTD8     | 1.19105219 | 0.01746703 | conserved  | conserved |
| KCTD9     | 0.17639448 | 0.03085044 | conserved  | conserved |
| KDEL1     | 0.24230473 | 0.73724252 | conserved  | conserved |
| KDEL2     | 0.34003223 | 0.82573243 | conserved  | conserved |
| KDEL3     | 0.10621687 | 0.16232371 | conserved  | conserved |
| KDF1      | 0.00151387 | 0          | conserved  | conserved |
| KDM1A     | 0.91231653 | 0.30836166 | conserved  | conserved |
| KDM1B     | 0.64851575 | 0.08890442 | conserved  | conserved |
| KDM2A     | 3.55298677 | 0.40584348 | conserved  | conserved |
| KDM3A     | 0.58492614 | 0.20000764 | conserved  | conserved |
| KDM3B     | 2.02213331 | 0.31159144 | conserved  | conserved |
| KDM4B     | 1.11185548 | 0.16622161 | conserved  | conserved |
| KDM4C     | 3.91155099 | 0.094171   | monkey-NSC | conserved |
| KDM4D     | 0.00210019 | 0.005721   | conserved  | conserved |
| KDM5A     | 1.19300804 | 0.68167781 | conserved  | conserved |
| KDM5B     | 0.89586949 | 0.64441142 | conserved  | conserved |
| KDM5C     | 0.33255056 | 0.13532028 | conserved  | conserved |
| KDM6A     | 3.04275865 | 0.16867656 | conserved  | conserved |
| KDM7A     | 0.74476179 | 0.35598146 | conserved  | conserved |
| KDM8      | 0.1062932  | 0.00466736 | conserved  | conserved |
| KDR       | 0.00760621 | 0.03210386 | conserved  | conserved |
| KDSR      | 0.53438855 | 0.52540202 | conserved  | conserved |
| KEAP1     | 0.14861284 | 0.48594728 | conserved  | conserved |
| KHDRBS1   | 0.46198357 | 1.27240965 | conserved  | conserved |
| KHDRBS3   | 1.50654025 | 0.34719036 | conserved  | conserved |
| KHNYN     | 0.18554723 | 0.02388195 | conserved  | conserved |
| KIDINS220 | 1.90963162 | 0.4882111  | conserved  | conserved |
| KIF11     | 0.01887723 | 0.00549617 | conserved  | conserved |
| KIF12     | 0.00222543 | 0          | conserved  | conserved |
| KIF13A    | 3.65960274 | 0.15758118 | conserved  | conserved |
| KIF13B    | 0.61318605 | 0.00286829 | conserved  | conserved |
| KIF14     | 0.05747119 | 0.00105521 | conserved  | conserved |
| KIF15     | 0.06195051 | 0.02524545 | conserved  | conserved |
| KIF18A    | 0.0065835  | 0.01938734 | conserved  | conserved |

|         |            |            |            |           |
|---------|------------|------------|------------|-----------|
| KIF18B  | 0.01818714 | 0          | conserved  | conserved |
| KIF1A   | 0.31488958 | 1.39140717 | conserved  | conserved |
| KIF1B   | 6.76039917 | 3.14533413 | monkey-NSC | conserved |
| KIF1C   | 0.59601841 | 0.11543443 | conserved  | conserved |
| KIF20A  | 0          | 0.00499218 | conserved  | conserved |
| KIF20B  | 0.06986787 | 0.02571469 | conserved  | conserved |
| KIF21B  | 0.60320416 | 0.15280424 | conserved  | conserved |
| KIF22   | 0.16289392 | 0.09988581 | conserved  | conserved |
| KIF23   | 0.02041597 | 0          | conserved  | conserved |
| KIF24   | 0.15714716 | 0.00809958 | conserved  | conserved |
| KIF27   | 0.28963349 | 0.00605231 | conserved  | conserved |
| KIF2A   | 1.24654739 | 0.34657755 | conserved  | conserved |
| KIF2C   | 0.04006033 | 0.00696359 | conserved  | conserved |
| KIF3B   | 0.42142594 | 0.14394861 | conserved  | conserved |
| KIF3C   | 0.61265741 | 0.19609769 | conserved  | conserved |
| KIF5A   | 0.29040442 | 0.15975281 | conserved  | conserved |
| KIF5B   | 1.00952489 | 2.49535503 | conserved  | conserved |
| KIF5C   | 1.51536983 | 0.75299347 | conserved  | conserved |
| KIF6    | 0.60826442 | 0.02024089 | conserved  | conserved |
| KIF9    | 0.13237386 | 0.02164975 | conserved  | conserved |
| KIFAP3  | 1.91677546 | 0.70267468 | conserved  | conserved |
| KIFC2   | 0.00428924 | 0.13478826 | conserved  | conserved |
| KIFC3   | 1.29712761 | 0.18780141 | monkey-NSC | conserved |
| KIN     | 0.20950202 | 0.25321061 | conserved  | conserved |
| KIRREL3 | 6.18299376 | 0.04232954 | conserved  | conserved |
| KIZ     | 0.98358806 | 0.2088627  | conserved  | conserved |
| KL      | 0.01591828 | 0          | conserved  | conserved |
| KLB     | 0.04551595 | 0          | conserved  | conserved |
| KLC2    | 0.33531276 | 0.19537762 | conserved  | conserved |
| KLC3    | 0.0032006  | 0.01836881 | conserved  | conserved |
| KLC4    | 0.39287427 | 0.1337848  | conserved  | conserved |
| KLF1    | 0.00287505 | 0.01631877 | conserved  | conserved |
| KLF10   | 0.03043684 | 0.18719265 | conserved  | conserved |
| KLF11   | 0.06336347 | 0.07869671 | conserved  | conserved |
| KLF12   | 3.1737431  | 0.00670849 | conserved  | conserved |
| KLF15   | 0.85930743 | 0.34925841 | conserved  | conserved |
| KLF17   | 0          | 0          | conserved  | conserved |
| KLF3    | 0.47973828 | 0.96850083 | conserved  | conserved |
| KLF4    | 0.00513166 | 1.07341442 | mouse-RGL  | conserved |
| KLF6    | 0.11018372 | 1.37404609 | mouse-RGL  | conserved |
| KLF7    | 1.24759312 | 1.29703459 | conserved  | conserved |

|         |            |            |            |           |
|---------|------------|------------|------------|-----------|
| KLFB    | 0.13477651 | 0.00590494 | conserved  | conserved |
| KLHDC1  | 1.02938943 | 0.17336541 | conserved  | conserved |
| KLHDC10 | 1.64656817 | 0.355958   | conserved  | conserved |
| KLHDC2  | 0.72000423 | 1.3811514  | conserved  | conserved |
| KLHDC3  | 0.15861766 | 0.52769519 | conserved  | conserved |
| KLHDC4  | 0.4043134  | 0.05843101 | conserved  | conserved |
| KLHDC8A | 0.03680506 | 0.08851428 | conserved  | conserved |
| KLHDC8B | 0.32687579 | 0.70570127 | conserved  | conserved |
| KLHDC9  | 0.01771663 | 0.10298002 | conserved  | conserved |
| KLHL1   | 0.29334571 | 0          | conserved  | conserved |
| KLHL10  | 0.02131945 | 0.00431325 | conserved  | conserved |
| KLHL11  | 0.03301958 | 0.02103858 | conserved  | conserved |
| KLHL13  | 0.21151496 | 0.21864605 | conserved  | conserved |
| KLHL14  | 0.00231116 | 0          | conserved  | conserved |
| KLHL15  | 0.16645387 | 0.08646578 | conserved  | conserved |
| KLHL2   | 1.98818097 | 0.13401527 | conserved  | conserved |
| KLHL20  | 0.47749021 | 0.15048298 | conserved  | conserved |
| KLHL21  | 0.08596776 | 0.04611551 | conserved  | conserved |
| KLHL25  | 0.16446035 | 0.2213478  | conserved  | conserved |
| KLHL28  | 0.60046167 | 0.06776834 | conserved  | conserved |
| KLHL29  | 0.95092583 | 0.01693939 | conserved  | conserved |
| KLHL3   | 0.59861941 | 0.01553431 | conserved  | conserved |
| KLHL30  | 0.00285954 | 0          | conserved  | conserved |
| KLHL32  | 2.1723943  | 0.11851225 | monkey-NSC | conserved |
| KLHL38  | 0          | 0          | conserved  | conserved |
| KLHL4   | 0.27861511 | 0          | conserved  | conserved |
| KLHL40  | 0.00190003 | 0.02457403 | conserved  | conserved |
| KLHL42  | 0.33701162 | 0.08668698 | conserved  | conserved |
| KLHL5   | 1.55358362 | 1.24597129 | conserved  | conserved |
| KLHL7   | 1.42014991 | 0.3919459  | conserved  | conserved |
| KLHL8   | 0.90949791 | 0.19892538 | conserved  | conserved |
| KLHL9   | 0.14129773 | 0.99798202 | conserved  | conserved |
| KLK12   | 0          | 0          | conserved  | conserved |
| KLK15   | 0.00205181 | 0          | conserved  | conserved |
| KLK4    | 0.00207794 | 0          | conserved  | conserved |
| KLK5    | 0.0059153  | 0          | conserved  | conserved |
| KLK8    | 0.00126437 | 0.01569697 | conserved  | conserved |
| KLKB1   | 0.05617368 | 0.00319182 | conserved  | conserved |
| KLRD1   | 0.04222787 | 0          | conserved  | conserved |
| KLRG1   | 0.01466287 | 0          | conserved  | conserved |
| KMO     | 0.00972917 | 0          | conserved  | conserved |

|         |            |            |           |           |
|---------|------------|------------|-----------|-----------|
| KMT2C   | 6.65568696 | 0.91502309 | conserved | conserved |
| KMT2E   | 2.44393994 | 1.49894971 | conserved | conserved |
| KNCN    | 0.00170409 | 0          | conserved | conserved |
| KNOP1   | 0.1760547  | 0.98700081 | conserved | conserved |
| KNTC1   | 0.05365711 | 0.01039746 | conserved | conserved |
| KPNA1   | 0.92138258 | 0.37850125 | conserved | conserved |
| KPNA3   | 1.18909764 | 0.47276276 | conserved | conserved |
| KPNA4   | 0.84769275 | 0.46107516 | conserved | conserved |
| KPNA6   | 0.64273394 | 0.14267339 | conserved | conserved |
| KPNA7   | 0.01547885 | 0          | conserved | conserved |
| KPNB1   | 0.90885381 | 0.79916269 | conserved | conserved |
| KPTN    | 0.11906853 | 0.14690681 | conserved | conserved |
| KRAS    | 0.47835888 | 0.87871766 | conserved | conserved |
| KRBA1   | 0.1387651  | 0.1315115  | conserved | conserved |
| KRCC1   | 0.11479027 | 1.44438181 | mouse-RGL | conserved |
| KREMEN1 | 0.95897809 | 0.13636657 | conserved | conserved |
| KRI1    | 0.08995453 | 0.13280131 | conserved | conserved |
| KRR1    | 0.08757502 | 0.25147308 | conserved | conserved |
| KRT1    | 0          | 0.13994523 | conserved | conserved |
| KRT10   | 0.12582661 | 1.21812354 | conserved | conserved |
| KRT12   | 0.00180798 | 0          | conserved | conserved |
| KRT16   | 0          | 0          | conserved | conserved |
| KRT20   | 0.01348377 | 0          | conserved | conserved |
| KRT23   | 0.00423352 | 0          | conserved | conserved |
| KRT24   | 0.00184128 | 0          | conserved | conserved |
| KRT26   | 0.00135934 | 0          | conserved | conserved |
| KRT27   | 0          | 0          | conserved | conserved |
| KRT28   | 0.00404197 | 0.0060223  | conserved | conserved |
| KRT32   | 0          | 0          | conserved | conserved |
| KRT35   | 0          | 0          | conserved | conserved |
| KRT39   | 0.01029203 | 0          | conserved | conserved |
| KRT40   | 0.00197716 | 0          | conserved | conserved |
| KRT7    | 0          | 0          | conserved | conserved |
| KRT73   | 0          | 0          | conserved | conserved |
| KRT75   | 0          | 0          | conserved | conserved |
| KRT77   | 0          | 0          | conserved | conserved |
| KRT78   | 0          | 0          | conserved | conserved |
| KRT79   | 0          | 0          | conserved | conserved |
| KRT80   | 0          | 0          | conserved | conserved |
| KRT82   | 0          | 0          | conserved | conserved |
| KRT84   | 0          | 0          | conserved | conserved |



|         |            |            |            |                      |
|---------|------------|------------|------------|----------------------|
| KRTCAP2 | 0.08455753 | 2.74715824 | mouse-RGL  | conserved            |
| KRTCAP3 | 0.01502743 | 0.00322465 | conserved  | conserved            |
| KSR1    | 0.97411642 | 0.0521764  | conserved  | conserved            |
| KSR2    | 1.01859766 | 0.02625535 | conserved  | conserved            |
| KTN1    | 2.42737268 | 1.48041078 | conserved  | conserved            |
| KY      | 0.05812964 | 0.02461727 | conserved  | conserved            |
| KYNU    | 0.05561196 | 0          | conserved  | conserved            |
| L1CAM   | 0.07751846 | 0.02739663 | conserved  | conserved            |
| L1TD1   | 0          | 0          | conserved  | conserved            |
| L2HGDH  | 0.25407218 | 0.11930762 | conserved  | conserved            |
| L3MBTL2 | 0.3459652  | 0.11062551 | conserved  | conserved            |
| L3MBTL3 | 0.20632184 | 0.29410019 | conserved  | conserved            |
| L3MBTL4 | 5.8995575  | 0          | monkey-NSC | conserved            |
| LACTB   | 0.13669903 | 0.13198712 | conserved  | conserved            |
| LACTB2  | 0.1367818  | 0.08558133 | conserved  | conserved            |
| LACTBL1 | 0          | 0          | conserved  | conserved            |
| LALBA   | 0          | 0          | conserved  | conserved            |
| LAMA2   | 0.27278104 | 0.28976692 | conserved  | conserved            |
| LAMA3   | 1.48792134 | 0          | monkey-NSC | monkey-NSC1-enriched |
| LAMA4   | 0.44277761 | 0.03758838 | conserved  | conserved            |
| LAMB1   | 0.17469347 | 0.00933023 | conserved  | conserved            |
| LAMB2   | 0.2874902  | 0.34235093 | conserved  | conserved            |
| LAMB3   | 0.02379066 | 0.00622746 | conserved  | conserved            |
| LAMC1   | 0.54860752 | 0.21939027 | conserved  | conserved            |
| LAMC2   | 0.00908298 | 0.00248665 | conserved  | conserved            |
| LAMC3   | 0.03406634 | 0          | conserved  | conserved            |
| LAMP1   | 0.283065   | 4.29899046 | conserved  | conserved            |
| LAMP5   | 0.08664778 | 0.00551831 | conserved  | conserved            |
| LAMTOR1 | 0.33261235 | 1.93906824 | conserved  | conserved            |
| LAMTOR2 | 0.05094596 | 2.65934315 | mouse-RGL  | conserved            |
| LAMTOR3 | 0.14751064 | 0.2821138  | conserved  | conserved            |
| LAMTOR4 | 0.13709476 | 1.90212484 | mouse-RGL  | conserved            |
| LANCL2  | 0.85058828 | 0.13141983 | conserved  | conserved            |
| LANCL3  | 0.01891928 | 0.02616838 | conserved  | conserved            |
| LAP3    | 0.25714923 | 0.75984927 | conserved  | conserved            |
| LAPTM4A | 0.79031061 | 4.02063514 | conserved  | conserved            |
| LAPTM4B | 0.2912299  | 0.13554873 | conserved  | conserved            |
| LAPTM5  | 0.01487593 | 0.02875777 | conserved  | conserved            |
| LARP1   | 0.89928176 | 0.25868846 | conserved  | conserved            |
| LARP1B  | 1.05106994 | 0.17341186 | conserved  | conserved            |
| LARP4   | 2.73865118 | 0.36956711 | monkey-NSC | conserved            |

|         |            |            |            |           |
|---------|------------|------------|------------|-----------|
| LARP4B  | 0.7508691  | 0.84929906 | conserved  | conserved |
| LARP6   | 0.02920036 | 0.04829439 | conserved  | conserved |
| LARS2   | 0.54920434 | 0.03671307 | conserved  | conserved |
| LAS1L   | 0.26087883 | 0.43358177 | conserved  | conserved |
| LASP1   | 0.38082235 | 0.77399706 | conserved  | conserved |
| LAT2    | 0.02026363 | 0.01121989 | conserved  | conserved |
| LATS1   | 0.98747546 | 0.31301491 | conserved  | conserved |
| LAX1    | 0.00567049 | 0          | conserved  | conserved |
| LAYN    | 0.01218998 | 0.05651518 | conserved  | conserved |
| LBP     | 0.00509155 | 0.01875644 | conserved  | conserved |
| LBR     | 0.21780929 | 0.19297945 | conserved  | conserved |
| LBX2    | 0          | 0.00723397 | conserved  | conserved |
| LCA5    | 0.23242561 | 0.1469538  | conserved  | conserved |
| LCA5L   | 0.29104947 | 0.10441357 | conserved  | conserved |
| LCK     | 0.02206037 | 0.02145153 | conserved  | conserved |
| LCLAT1  | 0.75681171 | 0.0779689  | conserved  | conserved |
| LCMT1   | 2.06746271 | 0.47043659 | conserved  | conserved |
| LCN10   | 0          | 0          | conserved  | conserved |
| LCN8    | 0          | 0          | conserved  | conserved |
| LCN9    | 0.01720236 | 0          | conserved  | conserved |
| LCP1    | 0.01865886 | 0.01692079 | conserved  | conserved |
| LCP2    | 0.03794382 | 0          | conserved  | conserved |
| LCT     | 0.00894257 | 0.01053417 | conserved  | conserved |
| LCTL    | 0.00572645 | 0          | conserved  | conserved |
| LDAH    | 1.79791221 | 0.27802576 | conserved  | conserved |
| LDB1    | 0.19847304 | 0.30785964 | conserved  | conserved |
| LDB2    | 2.36098182 | 0.0703469  | conserved  | conserved |
| LDB3    | 0.10324156 | 0.00331874 | conserved  | conserved |
| LDHC    | 0.04211417 | 0          | conserved  | conserved |
| LDHD    | 0.12277718 | 0.03979549 | conserved  | conserved |
| LDLR    | 0.41830973 | 0.10423532 | conserved  | conserved |
| LDLRAD1 | 0.01081988 | 0          | conserved  | conserved |
| LDLRAD2 | 0.0034201  | 0          | conserved  | conserved |
| LDLRAD3 | 1.0221216  | 0.57965896 | conserved  | conserved |
| LDLRAD4 | 3.2686567  | 0.00908805 | monkey-NSC | conserved |
| LDOC1   | 0.04104251 | 0.00467077 | conserved  | conserved |
| LECT2   | 0.00087361 | 0          | conserved  | conserved |
| LEF1    | 0.03605675 | 0.54340037 | conserved  | conserved |
| LEMD1   | 0.0669234  | 0.02782896 | conserved  | conserved |
| LEMD2   | 0.31772582 | 0.14187779 | conserved  | conserved |
| LEMD3   | 0.56074878 | 0.13079587 | conserved  | conserved |

|          |            |            |            |           |
|----------|------------|------------|------------|-----------|
| LENG1    | 0.22601377 | 0.25475359 | conserved  | conserved |
| LENG8    | 0.97276669 | 0.82150423 | conserved  | conserved |
| LEO1     | 0.23133333 | 0.16901723 | conserved  | conserved |
| LEP      | 0.00130309 | 0          | conserved  | conserved |
| LEPR     | 0.15232819 | 0.01634752 | conserved  | conserved |
| LEPROT   | 0.24125998 | 0.41779211 | conserved  | conserved |
| LEPROTL1 | 0.1682475  | 0.41021153 | conserved  | conserved |
| LETM1    | 0.32338131 | 0.52739366 | conserved  | conserved |
| LETM2    | 0.30250643 | 0.11096714 | conserved  | conserved |
| LETMD1   | 0.56053984 | 0.28824358 | conserved  | conserved |
| LEXM     | 0.00267233 | 0          | conserved  | conserved |
| LFNG     | 0.94623591 | 1.16223934 | conserved  | conserved |
| LGALS12  | 0.0009705  | 0          | conserved  | conserved |
| LGALS3   | 0.0410136  | 0.32987111 | conserved  | conserved |
| LGALS3BP | 0.02707246 | 0.0486391  | conserved  | conserved |
| LGALS8   | 0.25611759 | 0.13504689 | conserved  | conserved |
| LGI1     | 3.45373245 | 0.52005929 | monkey-NSC | conserved |
| LGI2     | 0.01238833 | 0.00777188 | conserved  | conserved |
| LGI3     | 0.03649404 | 0.04794967 | conserved  | conserved |
| LGI4     | 1.93794349 | 0.20272571 | monkey-NSC | conserved |
| LGMN     | 0.27262657 | 0.39754973 | conserved  | conserved |
| LGR4     | 2.6917079  | 0.73908008 | monkey-NSC | conserved |
| LGR5     | 0.06965847 | 0          | conserved  | conserved |
| LGR6     | 0.12738528 | 0.01465991 | conserved  | conserved |
| LHFPL1   | 0.23438359 | 0          | conserved  | conserved |
| LHFPL2   | 0.30748117 | 0.42471886 | conserved  | conserved |
| LHFPL3   | 2.96461195 | 0.0173922  | monkey-NSC | conserved |
| LHFPL5   | 0.02186313 | 0          | conserved  | conserved |
| LHPP     | 1.21256339 | 0.218664   | conserved  | conserved |
| LHX1     | 0          | 0.00327811 | conserved  | conserved |
| LHX2     | 1.77354627 | 4.16559588 | conserved  | conserved |
| LHX3     | 0          | 0          | conserved  | conserved |
| LHX6     | 0.01916698 | 0.01496523 | conserved  | conserved |
| LHX8     | 0          | 0          | conserved  | conserved |
| LHX9     | 0.00993951 | 0.48878156 | conserved  | conserved |
| LIAS     | 0.34531804 | 0.38725601 | conserved  | conserved |
| LIF      | 0          | 0.00866721 | conserved  | conserved |
| LIFR     | 4.27904929 | 0.20329069 | monkey-NSC | conserved |
| LIG1     | 0.05508443 | 0.36048276 | conserved  | conserved |
| LIG3     | 0.09569706 | 0.18812155 | conserved  | conserved |
| LIG4     | 0.05318851 | 0.06950716 | conserved  | conserved |

|        |            |            |            |                      |
|--------|------------|------------|------------|----------------------|
| LIMD1  | 0.32718898 | 0.53023664 | conserved  | conserved            |
| LIMD2  | 0.07642282 | 1.14463238 | mouse-RGL  | conserved            |
| LIMK1  | 0.36102339 | 0.14423998 | conserved  | conserved            |
| LIMK2  | 0.59956364 | 0.27691287 | conserved  | conserved            |
| LIMS2  | 0.0258548  | 0.02461029 | conserved  | conserved            |
| LIN28B | 0.05087952 | 0          | conserved  | conserved            |
| LIN54  | 0.46141467 | 0.11960655 | conserved  | conserved            |
| LIN7A  | 0.3035257  | 0.0255974  | conserved  | conserved            |
| LIN7C  | 0.13967044 | 0.80251059 | conserved  | conserved            |
| LIN9   | 0.1037801  | 0.06516777 | conserved  | conserved            |
| LINGO1 | 0.08431489 | 0.14412601 | conserved  | conserved            |
| LINGO4 | 0          | 0.00871753 | conserved  | conserved            |
| LINS1  | 0.11347998 | 0.0810675  | conserved  | conserved            |
| LIPA   | 0.3445156  | 0.06761148 | conserved  | conserved            |
| LIPC   | 0.05664285 | 0          | conserved  | conserved            |
| LIPE   | 0.27809969 | 0.23352799 | conserved  | conserved            |
| LIPF   | 0          | 0          | conserved  | conserved            |
| LIPG   | 0.04852241 | 0.05479025 | conserved  | conserved            |
| LIPJ   | 0.0099112  | 0          | conserved  | conserved            |
| LIPK   | 0          | 0          | conserved  | conserved            |
| LIPM   | 0.00939405 | 0          | conserved  | conserved            |
| LIPN   | 0.0115766  | 0          | conserved  | conserved            |
| LIPT2  | 0.00644184 | 0.13691711 | conserved  | conserved            |
| LIX1   | 0.08953183 | 1.73232916 | conserved  | conserved            |
| LIX1L  | 0.32415041 | 0.34497493 | conserved  | conserved            |
| LLGL1  | 0.13281674 | 0.37512931 | conserved  | conserved            |
| LLGL2  | 0.06099354 | 0.00823413 | conserved  | conserved            |
| LLPH   | 0.05179234 | 1.16691489 | mouse-RGL  | conserved            |
| LMAN1  | 0.17571808 | 0.344429   | conserved  | conserved            |
| LMAN2L | 0.27741568 | 0.35564256 | conserved  | conserved            |
| LMBR1  | 1.04130396 | 0.18986278 | conserved  | conserved            |
| LMBR1L | 0.16082561 | 0.12667769 | conserved  | conserved            |
| LMBRD1 | 1.84775338 | 0.89450797 | monkey-NSC | conserved            |
| LMBRD2 | 0.32321235 | 0.02352868 | conserved  | conserved            |
| LMCD1  | 0.02945775 | 0.38543065 | conserved  | conserved            |
| LMF1   | 1.88591872 | 0.08626759 | monkey-NSC | conserved            |
| LMLN   | 0.32104013 | 0.03812497 | conserved  | conserved            |
| LMNA   | 0.26696214 | 0.21393166 | conserved  | conserved            |
| LMNB1  | 0.0895651  | 0.69819009 | conserved  | conserved            |
| LMNB2  | 0.04457631 | 0.12207803 | conserved  | conserved            |
| LMNTD1 | 1.92295332 | 0.00366614 | monkey-NSC | monkey-NSC1-enriched |

|        |            |            |            |           |
|--------|------------|------------|------------|-----------|
| LMNTD2 | 0.00142437 | 0          | conserved  | conserved |
| LMO1   | 0.17199813 | 0.06166788 | conserved  | conserved |
| LMO2   | 0.69382452 | 0.02179155 | conserved  | conserved |
| LMO3   | 2.11968653 | 0.27287661 | conserved  | conserved |
| LMO4   | 0.55051285 | 0.63085299 | conserved  | conserved |
| LMO7   | 0.48464754 | 0.11504204 | conserved  | conserved |
| LMOD1  | 0.07004822 | 0          | conserved  | conserved |
| LMOD2  | 0.00091101 | 0          | conserved  | conserved |
| LMOD3  | 0.00345133 | 0          | conserved  | conserved |
| LMX1A  | 0.00639631 | 0.06199457 | conserved  | conserved |
| LMX1B  | 0.00249201 | 0          | conserved  | conserved |
| LNPEP  | 0.67243604 | 0.02717594 | conserved  | conserved |
| LNX1   | 0.15591209 | 0.0296408  | conserved  | conserved |
| LONP2  | 3.50242265 | 0.24447565 | conserved  | conserved |
| LONRF2 | 1.05100631 | 0.29783246 | conserved  | conserved |
| LONRF3 | 0.48685902 | 0.02184622 | conserved  | conserved |
| LOXL1  | 0.05809633 | 0.40511301 | conserved  | conserved |
| LOXL3  | 0.36595962 | 0.09975508 | conserved  | conserved |
| LPAR2  | 0.00610738 | 0.03337529 | conserved  | conserved |
| LPAR3  | 0.89710618 | 0.01076047 | conserved  | conserved |
| LPAR4  | 0.02644272 | 0.25619884 | conserved  | conserved |
| LPCAT2 | 0.07338196 | 0.00769208 | conserved  | conserved |
| LPCAT3 | 0.70061749 | 0.36972368 | conserved  | conserved |
| LPCAT4 | 1.01374214 | 0.02794597 | conserved  | conserved |
| LPGAT1 | 1.17128893 | 0.14206071 | conserved  | conserved |
| LPIN1  | 0.95809195 | 0.15911044 | conserved  | conserved |
| LPIN2  | 0.6526294  | 0.30918565 | conserved  | conserved |
| LPIN3  | 0.00213992 | 0.0083627  | conserved  | conserved |
| LPO    | 0.00534283 | 0          | conserved  | conserved |
| LPP    | 5.70666404 | 0.36667508 | conserved  | conserved |
| LPXN   | 0.03738663 | 0.00230804 | conserved  | conserved |
| LRAT   | 0          | 0.00304243 | conserved  | conserved |
| LRCH1  | 1.17314204 | 0.04227507 | conserved  | conserved |
| LRCH3  | 1.92766525 | 0.16944287 | conserved  | conserved |
| LRFN2  | 0.07046244 | 0.00427452 | conserved  | conserved |
| LRFN4  | 0.22484703 | 0.47076291 | conserved  | conserved |
| LRFN5  | 0.8789871  | 0.02160801 | conserved  | conserved |
| LRG1   | 0.0015148  | 0          | conserved  | conserved |
| LRIF1  | 0.11945519 | 0.29625987 | conserved  | conserved |
| LRIG1  | 7.5742334  | 0.30970638 | monkey-NSC | conserved |
| LRIG2  | 0.9063572  | 0.11998545 | conserved  | conserved |

|        |            |            |            |                      |
|--------|------------|------------|------------|----------------------|
| LRIG3  | 0.19617286 | 0.020864   | conserved  | conserved            |
| LRIT1  | 0.00331386 | 0          | conserved  | conserved            |
| LRIT2  | 0          | 0          | conserved  | conserved            |
| LRIT3  | 0.00377299 | 0          | conserved  | conserved            |
| LRP1   | 2.7239252  | 0.98057364 | monkey-NSC | conserved            |
| LRP10  | 0.09520758 | 0.40325706 | conserved  | conserved            |
| LRP12  | 0.47554837 | 0.08509353 | conserved  | conserved            |
| LRP1B  | 37.3894913 | 0.20030414 | conserved  | conserved            |
| LRP2   | 0.01152332 | 0.00739998 | conserved  | conserved            |
| LRP4   | 2.06118592 | 0.67416992 | conserved  | conserved            |
| LRP6   | 2.20507629 | 0.40384719 | conserved  | conserved            |
| LRP8   | 0.49045038 | 0.45428445 | conserved  | conserved            |
| LRPAP1 | 0.33389152 | 0.78806246 | conserved  | conserved            |
| LRR1   | 0.01549723 | 0.05675641 | conserved  | conserved            |
| LRRC15 | 0          | 0          | conserved  | conserved            |
| LRRC17 | 0.0488917  | 0          | conserved  | conserved            |
| LRRC18 | 0.00102866 | 0          | conserved  | conserved            |
| LRRC19 | 0.14210942 | 0          | conserved  | conserved            |
| LRRC20 | 0.16330781 | 0.04998791 | conserved  | conserved            |
| LRRC23 | 0.04769589 | 0.06572079 | conserved  | conserved            |
| LRRC25 | 0.02125707 | 0          | conserved  | conserved            |
| LRRC27 | 0.35582298 | 0.03946509 | conserved  | conserved            |
| LRRC28 | 1.77542393 | 0.14624113 | conserved  | conserved            |
| LRRC3  | 0.03309146 | 0.04378877 | conserved  | conserved            |
| LRRC31 | 0.00718011 | 0          | conserved  | conserved            |
| LRRC32 | 0.00117406 | 0          | conserved  | conserved            |
| LRRC34 | 0.15046102 | 0.00212349 | conserved  | conserved            |
| LRRC36 | 0.04161911 | 0.00650838 | conserved  | conserved            |
| LRRC39 | 0.18216001 | 0          | conserved  | conserved            |
| LRRC3B | 1.54395366 | 0.00288001 | monkey-NSC | monkey-NSC1-enriched |
| LRRC3C | 0.00093769 | 0          | conserved  | conserved            |
| LRRC4  | 0.16403261 | 0.0555366  | conserved  | conserved            |
| LRRC40 | 0.35338298 | 0.17037473 | conserved  | conserved            |
| LRRC41 | 0.62251504 | 0.1750151  | conserved  | conserved            |
| LRRC42 | 0.09487935 | 0.22134163 | conserved  | conserved            |
| LRRC43 | 0.11493968 | 0          | conserved  | conserved            |
| LRRC46 | 0.00195995 | 0.0173773  | conserved  | conserved            |
| LRRC47 | 0.07975159 | 0.24960707 | conserved  | conserved            |
| LRRC49 | 1.21326301 | 0.23587381 | conserved  | conserved            |
| LRRC4C | 1.72771886 | 0.28119009 | monkey-NSC | conserved            |
| LRRC52 | 0.00716913 | 0          | conserved  | conserved            |

|          |            |            |            |                      |
|----------|------------|------------|------------|----------------------|
| LRRCS56  | 0.01735403 | 0.02470823 | conserved  | conserved            |
| LRRCS58  | 0.34119971 | 1.84120747 | conserved  | conserved            |
| LRRCS6   | 0.29112946 | 0.01527222 | conserved  | conserved            |
| LRRCS61  | 0.02973603 | 0.12639187 | conserved  | conserved            |
| LRRCS63  | 0.0291291  | 0.00258829 | conserved  | conserved            |
| LRRCS66  | 0.1181464  | 0          | conserved  | conserved            |
| LRRCS7   | 6.46768704 | 0.19411052 | conserved  | conserved            |
| LRRCS74A | 0.01446083 | 0          | conserved  | conserved            |
| LRRCS75A | 0.28099789 | 0.03332208 | conserved  | conserved            |
| LRRCS75B | 0.10137615 | 0.12703457 | conserved  | conserved            |
| LRRCS8B  | 0.32251903 | 0.26574069 | conserved  | conserved            |
| LRRCS8C  | 0.46766355 | 0.18475539 | conserved  | conserved            |
| LRRCS8E  | 0.00207104 | 0.00974252 | conserved  | conserved            |
| LRRCS9   | 0.13255516 | 0          | conserved  | conserved            |
| LRRCC1   | 0.34087136 | 0.29231603 | conserved  | conserved            |
| LRRD1    | 0.02189146 | 0.00482669 | conserved  | conserved            |
| LRRFIP2  | 1.20272877 | 0.34579887 | conserved  | conserved            |
| LRRIQ3   | 0.35152148 | 0.01051682 | conserved  | conserved            |
| LRRIQ4   | 0.00748613 | 0          | conserved  | conserved            |
| LRRK1    | 0.05248349 | 0.10793082 | conserved  | conserved            |
| LRRK2    | 0.30975816 | 0.0754415  | conserved  | conserved            |
| LRRN1    | 0.47209345 | 0.22392461 | conserved  | conserved            |
| LRRN2    | 0.57652358 | 0.07105041 | conserved  | conserved            |
| LRRN4CL  | 0          | 0.00707579 | conserved  | conserved            |
| LRRTM1   | 0.00726723 | 0.03876005 | conserved  | conserved            |
| LRRTM2   | 0.03148418 | 0.28072811 | conserved  | conserved            |
| LRRTM3   | 1.65239243 | 0.01343309 | conserved  | conserved            |
| LRRTM4   | 7.49269217 | 0.0156026  | monkey-NSC | monkey-NSC1-enriched |
| LRSAM1   | 0.58545364 | 0.08798977 | conserved  | conserved            |
| LRTM1    | 0.06231637 | 0.02504446 | conserved  | conserved            |
| LRWD1    | 0.01771257 | 0.12247052 | conserved  | conserved            |
| LSAMP    | 47.3034825 | 2.03695433 | monkey-NSC | conserved            |
| LSG1     | 0.18834266 | 0.25871146 | conserved  | conserved            |
| LSM10    | 0.01710898 | 0.53638228 | conserved  | conserved            |
| LSM12    | 0.34317332 | 0.47739813 | conserved  | conserved            |
| LSM14B   | 0.11338439 | 0.23998833 | conserved  | conserved            |
| LSM4     | 0.10529441 | 2.04945839 | conserved  | conserved            |
| LSM7     | 0.10353398 | 0.99686198 | conserved  | conserved            |
| LSM8     | 0.10760514 | 1.20079997 | mouse-RGL  | conserved            |
| LSP1     | 0          | 0.04006941 | conserved  | conserved            |
| LSR      | 0.09933945 | 0.0140724  | conserved  | conserved            |

|         |            |            |            |           |
|---------|------------|------------|------------|-----------|
| LSS     | 0.63007518 | 0.18642227 | conserved  | conserved |
| LTA     | 0          | 0.00379047 | conserved  | conserved |
| LTA4H   | 0.23394943 | 0.13497291 | conserved  | conserved |
| LTB     | 0.00687679 | 0.00252326 | conserved  | conserved |
| LTBP1   | 2.26475166 | 0.48807287 | conserved  | conserved |
| LTBP2   | 0.06650257 | 0.01822634 | conserved  | conserved |
| LTBP3   | 0.92308595 | 0.28929936 | conserved  | conserved |
| LTBR    | 0.26180409 | 0.14414638 | conserved  | conserved |
| LTF     | 0.00134892 | 0          | conserved  | conserved |
| LTK     | 0.00772641 | 0.00849541 | conserved  | conserved |
| LTN1    | 0.7750061  | 0.14859641 | conserved  | conserved |
| LUC7L   | 1.79292505 | 0.79543663 | conserved  | conserved |
| LUC7L3  | 3.00344883 | 2.66108186 | conserved  | conserved |
| LUM     | 0.0006565  | 0.00647758 | conserved  | conserved |
| LURAP1  | 0.25850462 | 0.04017684 | conserved  | conserved |
| LURAP1L | 0.07854377 | 0.02531696 | conserved  | conserved |
| LUZP1   | 0.99283102 | 0.25192879 | conserved  | conserved |
| LUZP2   | 20.701355  | 1.39810392 | monkey-NSC | conserved |
| LVRN    | 0.04585107 | 0          | conserved  | conserved |
| LXN     | 0.02035607 | 2.8559343  | conserved  | conserved |
| LY6G6C  | 0.00703749 | 0          | conserved  | conserved |
| LY6H    | 0.49406945 | 1.13919082 | mouse-RGL  | conserved |
| LY6K    | 0.00159638 | 0          | conserved  | conserved |
| LY96    | 0.00275049 | 0.03950605 | conserved  | conserved |
| LYAR    | 0.07866546 | 0.57290703 | conserved  | conserved |
| LYG2    | 0.00225481 | 0          | conserved  | conserved |
| LYL1    | 0.0068199  | 0.00346922 | conserved  | conserved |
| LYN     | 0.66508017 | 0.1878144  | conserved  | conserved |
| LYPD4   | 0          | 0          | conserved  | conserved |
| LYPD6   | 0.36009413 | 0.05825046 | conserved  | conserved |
| LYPD6B  | 0.3813304  | 0.00598722 | conserved  | conserved |
| LYPLA2  | 0.07361573 | 0.32907931 | conserved  | conserved |
| LYPLAL1 | 0.76680422 | 0.21057514 | conserved  | conserved |
| LYRM2   | 0.22964742 | 0.59682783 | conserved  | conserved |
| LYRM7   | 0.18840131 | 0.03769271 | conserved  | conserved |
| LYSMD2  | 0.16063301 | 0.84666874 | conserved  | conserved |
| LYSMD3  | 0.07309405 | 0.1710523  | conserved  | conserved |
| LYSMD4  | 0.04388801 | 0.14027431 | conserved  | conserved |
| LYST    | 1.40459883 | 0.02233226 | conserved  | conserved |
| LYVE1   | 0.13875887 | 0          | conserved  | conserved |
| LYZL4   | 0          | 0          | conserved  | conserved |



|          |            |            |            |           |
|----------|------------|------------|------------|-----------|
| LYZL6    | 0          | 0          | conserved  | conserved |
| LZIC     | 0.19395685 | 0.44886692 | conserved  | conserved |
| LZTFL1   | 0.21542383 | 0.5447032  | conserved  | conserved |
| LZTR1    | 0.20293638 | 0.24109524 | conserved  | conserved |
| LZTS1    | 0.07824753 | 0.30887505 | conserved  | conserved |
| LZTS2    | 0.32273416 | 0.44115877 | conserved  | conserved |
| LZTS3    | 0.15333665 | 0.01339834 | conserved  | conserved |
| M1AP     | 0.0277835  | 0          | conserved  | conserved |
| M6PR     | 0.13530761 | 0.4992335  | conserved  | conserved |
| MAB21L1  | 0          | 0          | conserved  | conserved |
| MAB21L2  | 0          | 0          | conserved  | conserved |
| MAB21L3  | 0.02617246 | 0          | conserved  | conserved |
| MACC1    | 0.0932418  | 0          | conserved  | conserved |
| MACF1    | 22.887148  | 1.59570467 | monkey-NSC | conserved |
| MACROD2  | 16.8769014 | 0.27110021 | monkey-NSC | conserved |
| MAD1L1   | 0.8225829  | 0.07820988 | conserved  | conserved |
| MAD2L1BP | 0.03061203 | 0.08648064 | conserved  | conserved |
| MAD2L2   | 0.03049057 | 0.96291974 | mouse-RGL  | conserved |
| MADCAM1  | 0.00204826 | 0          | conserved  | conserved |
| MADD     | 0.60921837 | 0.1148109  | conserved  | conserved |
| MAEA     | 0.35646353 | 0.28602156 | conserved  | conserved |
| MAEL     | 0.02871023 | 0          | conserved  | conserved |
| MAF1     | 0.11514392 | 1.45714305 | mouse-RGL  | conserved |
| MAFF     | 0.12648406 | 0.10686535 | conserved  | conserved |
| MAFG     | 0.47156333 | 0.4696066  | conserved  | conserved |
| MAFK     | 0.00869816 | 0.04039872 | conserved  | conserved |
| MAGI1    | 5.14004234 | 0.89564485 | conserved  | conserved |
| MAGI2    | 28.8804347 | 0.32385222 | conserved  | conserved |
| MAGI3    | 1.59164947 | 0.10087456 | monkey-NSC | conserved |
| MAGIX    | 0.00576999 | 0          | conserved  | conserved |
| MAGT1    | 0.36369443 | 0.90695129 | conserved  | conserved |
| MAK      | 0.07851092 | 0.00509608 | conserved  | conserved |
| MAK16    | 0.07482323 | 0.33948184 | conserved  | conserved |
| MAL      | 0.04454059 | 0.0448866  | conserved  | conserved |
| MAL2     | 0.12759436 | 0.01443073 | conserved  | conserved |
| MALL     | 0.00555094 | 0          | conserved  | conserved |
| MALRD1   | 0.223963   | 0          | conserved  | conserved |
| MALSU1   | 0.24632839 | 0.45421492 | conserved  | conserved |
| MALT1    | 0.83712265 | 0.01676971 | conserved  | conserved |
| MAMDC2   | 0.38852866 | 0.22713238 | conserved  | conserved |
| MAML1    | 0.42812849 | 0.10169556 | conserved  | conserved |

|          |            |            |            |           |
|----------|------------|------------|------------|-----------|
| MAML2    | 15.7816849 | 0.55737593 | conserved  | conserved |
| MAML3    | 1.20853001 | 0.08898503 | conserved  | conserved |
| MAMLD1   | 1.21696282 | 0.02696737 | conserved  | conserved |
| MAN1B1   | 0.51088597 | 0.28796661 | conserved  | conserved |
| MAN1C1   | 0.63231065 | 0.01626444 | conserved  | conserved |
| MAN2A1   | 1.47876239 | 0.02493774 | monkey-NSC | conserved |
| MAN2A2   | 0.44886709 | 0.4049717  | conserved  | conserved |
| MAN2B2   | 0.0744221  | 0.0408296  | conserved  | conserved |
| MAN2C1   | 0.39929587 | 0.13640623 | conserved  | conserved |
| MANBA    | 0.40542738 | 0.02229895 | conserved  | conserved |
| MANEA    | 0.23624517 | 0.44270214 | conserved  | conserved |
| MANEAL   | 0.06209075 | 0.08364729 | conserved  | conserved |
| MANF     | 0.03701998 | 1.90112521 | mouse-RGL  | conserved |
| MANSC1   | 0.1131352  | 0.05917486 | conserved  | conserved |
| MAOA     | 0.23655944 | 0.19185808 | conserved  | conserved |
| MAP1A    | 0.9145643  | 0.21864027 | conserved  | conserved |
| MAP1B    | 2.55580324 | 2.56249451 | mouse-RGL  | conserved |
| MAP1LC3A | 0.10955909 | 3.51766556 | mouse-RGL  | conserved |
| MAP2     | 4.9569228  | 1.72401313 | conserved  | conserved |
| MAP2K1   | 1.45491788 | 0.40041037 | conserved  | conserved |
| MAP2K3   | 0.07241057 | 0.18420579 | conserved  | conserved |
| MAP2K4   | 2.21072473 | 0.20518435 | conserved  | conserved |
| MAP2K5   | 2.45070097 | 0.3133398  | conserved  | conserved |
| MAP2K6   | 0.67640534 | 0.24123168 | conserved  | conserved |
| MAP3K1   | 0.56786761 | 0.3384487  | conserved  | conserved |
| MAP3K13  | 1.03204615 | 0          | conserved  | conserved |
| MAP3K14  | 0.76589792 | 0.0799018  | conserved  | conserved |
| MAP3K19  | 0.09031658 | 0.00785477 | conserved  | conserved |
| MAP3K2   | 0.73192815 | 0.19241364 | conserved  | conserved |
| MAP3K3   | 0.74192328 | 0.05115916 | conserved  | conserved |
| MAP3K4   | 0.92813078 | 0.18499626 | conserved  | conserved |
| MAP3K6   | 0.03466949 | 0.0106975  | conserved  | conserved |
| MAP3K7   | 0.6027192  | 0.26397203 | conserved  | conserved |
| MAP3K9   | 0.29080049 | 0.00399064 | conserved  | conserved |
| MAP4K2   | 0.22714311 | 0.19830971 | conserved  | conserved |
| MAP4K4   | 9.95656011 | 1.25705457 | conserved  | conserved |
| MAP4K5   | 1.91202965 | 0.21285614 | conserved  | conserved |
| MAP6     | 0.88583553 | 0.09344688 | conserved  | conserved |
| MAP9     | 0.42852307 | 0.24627148 | conserved  | conserved |
| MAPK1    | 2.04617589 | 1.19183929 | conserved  | conserved |
| MAPK10   | 6.80580977 | 0.1592853  | monkey-NSC | conserved |

|          |            |            |            |           |
|----------|------------|------------|------------|-----------|
| MAPK11   | 0.32175041 | 0.04225797 | conserved  | conserved |
| MAPK12   | 0.29530927 | 0.02979142 | conserved  | conserved |
| MAPK13   | 0.03814937 | 0          | conserved  | conserved |
| MAPK15   | 0.00251196 | 0.05363413 | conserved  | conserved |
| MAPK3    | 0.20756678 | 0.56548282 | conserved  | conserved |
| MAPK7    | 0.01716833 | 0.35477252 | conserved  | conserved |
| MAPK8    | 0.10821925 | 0.38782971 | conserved  | conserved |
| MAPK8IP1 | 0.02389484 | 1.15999957 | mouse-RGL  | conserved |
| MAPK8IP3 | 1.74328711 | 0.45277991 | conserved  | conserved |
| MAPK9    | 0.92798387 | 0.23113529 | conserved  | conserved |
| MAPKAP1  | 1.73285575 | 0.63876566 | conserved  | conserved |
| MAPKAPK2 | 0.390504   | 0.17027371 | conserved  | conserved |
| MAPKAPK3 | 0.20064776 | 0.01826374 | conserved  | conserved |
| MAPKBP1  | 0.96956913 | 0.08397436 | conserved  | conserved |
| MAPRE2   | 1.64482375 | 0.74039422 | conserved  | conserved |
| MAPRE3   | 0.07679828 | 0.24722102 | conserved  | conserved |
| MARCKSL1 | 0.16915023 | 11.7581143 | mouse-RGL  | conserved |
| MARCO    | 0.00114824 | 0          | conserved  | conserved |
| MARF1    | 0.64573796 | 0.6072725  | conserved  | conserved |
| MARK1    | 2.48332672 | 0.1129674  | conserved  | conserved |
| MARK2    | 0.93310209 | 0.37817584 | conserved  | conserved |
| MARK3    | 4.53872985 | 0.61077941 | monkey-NSC | conserved |
| MARS2    | 0.00460586 | 0.18089283 | conserved  | conserved |
| MARVELD2 | 0.02521803 | 0.02864138 | conserved  | conserved |
| MAS1     | 0          | 0.00823413 | conserved  | conserved |
| MASP1    | 0.32725251 | 0          | conserved  | conserved |
| MASP2    | 0.10688035 | 0.02063185 | conserved  | conserved |
| MAST2    | 1.79958905 | 0.17827761 | conserved  | conserved |
| MAST3    | 0.27847469 | 0.1317379  | conserved  | conserved |
| MAST4    | 6.75892816 | 0.32303771 | conserved  | conserved |
| MASTL    | 0.07276638 | 0.05778575 | conserved  | conserved |
| MAT1A    | 0.00499821 | 0          | conserved  | conserved |
| MAT2A    | 1.62404541 | 2.11708554 | conserved  | conserved |
| MATK     | 0.08621504 | 0.15272169 | conserved  | conserved |
| MATN2    | 0.54909161 | 0.00587665 | conserved  | conserved |
| MATN3    | 0.01634465 | 0          | conserved  | conserved |
| MAU2     | 0.63523575 | 0.51952638 | conserved  | conserved |
| MAVS     | 0.7542581  | 0.14454097 | conserved  | conserved |
| MAX      | 0.58310359 | 0.85377452 | conserved  | conserved |
| MB       | 0          | 0          | conserved  | conserved |
| MB21D2   | 0.89392753 | 0.11294439 | conserved  | conserved |

|        |            |            |            |           |
|--------|------------|------------|------------|-----------|
| MBD1   | 0.19491089 | 0.19060023 | conserved  | conserved |
| MBD2   | 0.56269471 | 0.17299275 | conserved  | conserved |
| MBD3   | 0.32981798 | 2.09095169 | mouse-RGL  | conserved |
| MBD5   | 1.18535699 | 0.12383872 | conserved  | conserved |
| MBD6   | 0.22682257 | 0.15737457 | conserved  | conserved |
| MBIP   | 0.65628419 | 0.35291974 | conserved  | conserved |
| MBL2   | 0          | 0          | conserved  | conserved |
| MBLAC2 | 0.04621035 | 0.11482465 | conserved  | conserved |
| MBNL1  | 2.18638953 | 0.51530545 | conserved  | conserved |
| MBNL2  | 3.32188651 | 0.939488   | conserved  | conserved |
| MBNL3  | 0.04631818 | 0.00230804 | conserved  | conserved |
| MBOAT1 | 0.05069186 | 0.00876118 | conserved  | conserved |
| MBOAT2 | 2.31167364 | 0.11751692 | conserved  | conserved |
| MBTD1  | 2.18960855 | 0.90842745 | conserved  | conserved |
| MBTPS1 | 0.86946812 | 0.29769113 | conserved  | conserved |
| MC4R   | 0          | 0.00573816 | conserved  | conserved |
| MCAM   | 0.01866207 | 0.01147794 | conserved  | conserved |
| MCAT   | 0.05153245 | 0.27699114 | conserved  | conserved |
| MCC    | 6.82141007 | 0.18191743 | monkey-NSC | conserved |
| MCCC1  | 1.51040605 | 0.21728889 | conserved  | conserved |
| MCCC2  | 0.53896341 | 0.26123416 | conserved  | conserved |
| MCEMP1 | 0          | 0          | conserved  | conserved |
| MCF2   | 0.0988463  | 0.00146763 | conserved  | conserved |
| MCF2L  | 0.45678151 | 0.23598988 | conserved  | conserved |
| MCFD2  | 0.20961013 | 0.21835027 | conserved  | conserved |
| MCHR1  | 0.00320646 | 0.00849626 | conserved  | conserved |
| MCIDAS | 0          | 0          | conserved  | conserved |
| MCL1   | 0.04464708 | 0.53375043 | conserved  | conserved |
| MCM10  | 0.01572789 | 0.03505404 | conserved  | conserved |
| MCM2   | 0.01127261 | 0.21832959 | conserved  | conserved |
| MCM3   | 0.0117805  | 0.24979507 | conserved  | conserved |
| MCM3AP | 0.73055817 | 0.08130231 | conserved  | conserved |
| MCM4   | 0.13591769 | 0.28860053 | conserved  | conserved |
| MCM5   | 0.01613332 | 0.21926992 | conserved  | conserved |
| MCM6   | 0.0965788  | 0.47709346 | conserved  | conserved |
| MCM7   | 0.0328246  | 0.56518426 | conserved  | conserved |
| MCMBP  | 0.24268592 | 0.69316082 | conserved  | conserved |
| MCOLN1 | 0.13640701 | 0.07246509 | conserved  | conserved |
| MCOLN2 | 0.00246552 | 0          | conserved  | conserved |
| MCOLN3 | 0.01276796 | 0          | conserved  | conserved |
| MCPH1  | 1.1884894  | 0.03073679 | monkey-NSC | conserved |

|        |            |            |            |           |
|--------|------------|------------|------------|-----------|
| MCRS1  | 0.09417418 | 1.16584362 | mouse-RGL  | conserved |
| MCTP1  | 3.46978    | 0.08216055 | conserved  | conserved |
| MCTP2  | 0.00090106 | 0          | conserved  | conserved |
| MCU    | 1.32191207 | 0.16555299 | monkey-NSC | conserved |
| MCUR1  | 1.20600027 | 0.31417637 | conserved  | conserved |
| MDC1   | 0.27402859 | 0.09126323 | conserved  | conserved |
| MDFI   | 0.10664152 | 0.0890077  | conserved  | conserved |
| MDFIC  | 0.155991   | 0.12855327 | conserved  | conserved |
| MDGA1  | 0.18973115 | 0.03487962 | conserved  | conserved |
| MDGA2  | 4.49703918 | 0.12685705 | monkey-NSC | conserved |
| MDH1   | 0.93067123 | 1.36009973 | conserved  | conserved |
| MDH1B  | 0.28454267 | 0          | conserved  | conserved |
| MDH2   | 0.18508729 | 2.35167506 | conserved  | conserved |
| MDM1   | 0.15805811 | 0.05146991 | conserved  | conserved |
| MDM2   | 0.58678304 | 0.43244001 | conserved  | conserved |
| MDM4   | 1.02819773 | 0.43511943 | conserved  | conserved |
| MDN1   | 0.93596871 | 0.1562178  | conserved  | conserved |
| ME1    | 1.51229226 | 0.25547753 | monkey-NSC | conserved |
| ME2    | 0.59795967 | 0.15193481 | conserved  | conserved |
| ME3    | 0.57012111 | 0.08044625 | conserved  | conserved |
| MEA1   | 0.04617632 | 1.07800999 | mouse-RGL  | conserved |
| MECOM  | 0.05340232 | 0          | conserved  | conserved |
| MECP2  | 1.17149777 | 0.37366696 | conserved  | conserved |
| MECR   | 0.25280402 | 0.26164784 | conserved  | conserved |
| MED1   | 0.50483978 | 0.47579163 | conserved  | conserved |
| MED11  | 0.0509101  | 0.10226135 | conserved  | conserved |
| MED12  | 0.18680126 | 0.16262633 | conserved  | conserved |
| MED12L | 5.10484981 | 0.0991158  | monkey-NSC | conserved |
| MED13  | 3.09169788 | 0.57138248 | conserved  | conserved |
| MED13L | 5.93331919 | 0.43788113 | conserved  | conserved |
| MED14  | 0.49592677 | 0.14718785 | conserved  | conserved |
| MED15  | 0.68404902 | 0.18411216 | conserved  | conserved |
| MED16  | 0.12202163 | 0.1452611  | conserved  | conserved |
| MED17  | 0.28267191 | 0.2601719  | conserved  | conserved |
| MED19  | 0.15643705 | 0.81338509 | conserved  | conserved |
| MED21  | 0.21119037 | 1.31714288 | mouse-RGL  | conserved |
| MED23  | 0.67480514 | 0.1260453  | conserved  | conserved |
| MED25  | 0.24720374 | 1.16535307 | conserved  | conserved |
| MED27  | 1.92796281 | 0.17763637 | monkey-NSC | conserved |
| MED28  | 0.0951699  | 1.76637057 | mouse-RGL  | conserved |
| MED30  | 0.11213571 | 0.46858751 | conserved  | conserved |

|         |            |            |            |           |
|---------|------------|------------|------------|-----------|
| MED31   | 0.13869128 | 0.49356274 | conserved  | conserved |
| MED4    | 0.16977007 | 0.45962527 | conserved  | conserved |
| MED6    | 0.25568117 | 0.18661168 | conserved  | conserved |
| MED7    | 0.05728105 | 0.58414995 | conserved  | conserved |
| MED8    | 0.19031487 | 0.44482341 | conserved  | conserved |
| MED9    | 0.09035475 | 0.64638696 | conserved  | conserved |
| MEDAG   | 0          | 0          | conserved  | conserved |
| MEF2A   | 2.51460427 | 0.26978619 | monkey-NSC | conserved |
| MEF2C   | 1.89105437 | 0.33720728 | conserved  | conserved |
| MEF2D   | 0.38929835 | 0.19762753 | conserved  | conserved |
| MEFV    | 0.01567171 | 0          | conserved  | conserved |
| MEGF10  | 4.34942758 | 0.28764947 | monkey-NSC | conserved |
| MEGF11  | 0.40711049 | 0.08196259 | conserved  | conserved |
| MEGF6   | 0.00897284 | 0.01484931 | conserved  | conserved |
| MEGF8   | 0.43034957 | 0.1332742  | conserved  | conserved |
| MEGF9   | 1.34454067 | 0.338531   | conserved  | conserved |
| MEI1    | 0.11966333 | 0          | conserved  | conserved |
| MEI4    | 0.36118841 | 0          | conserved  | conserved |
| MEIG1   | 0.12663776 | 0.02796962 | conserved  | conserved |
| MEIOB   | 0.19487137 | 0          | conserved  | conserved |
| MEIOC   | 0.02430119 | 0          | conserved  | conserved |
| MEIS1   | 0.67687043 | 0.01811241 | conserved  | conserved |
| MEIS2   | 2.67982578 | 0.61608464 | monkey-NSC | conserved |
| MEIS3   | 0.38457025 | 0.23089769 | conserved  | conserved |
| MELK    | 0.03065167 | 0.00352134 | conserved  | conserved |
| MEOX2   | 0.01452638 | 0.00115849 | conserved  | conserved |
| MEP1B   | 0.03130456 | 0          | conserved  | conserved |
| MEPCE   | 0.09096805 | 0.18895698 | conserved  | conserved |
| MEPE    | 0.00640066 | 0          | conserved  | conserved |
| MERTK   | 4.0845709  | 0.12892071 | monkey-NSC | conserved |
| MESP1   | 0.00329529 | 0          | conserved  | conserved |
| MESP2   | 0.02383946 | 0.02428223 | conserved  | conserved |
| MET     | 0.05656487 | 0          | conserved  | conserved |
| METAP1  | 0.42246779 | 0.21549683 | conserved  | conserved |
| METAP1D | 0.6229644  | 0.25360287 | conserved  | conserved |
| METAP2  | 0.75662606 | 1.97855052 | conserved  | conserved |
| METRNL  | 0.0581374  | 0.13919754 | conserved  | conserved |
| METTL1  | 0.00809442 | 0.56604845 | conserved  | conserved |
| METTL14 | 0.24448324 | 0.10533636 | conserved  | conserved |
| METTL15 | 1.48227528 | 0.15214729 | conserved  | conserved |
| METTL16 | 1.00115045 | 0.36758613 | conserved  | conserved |

|         |            |            |            |           |
|---------|------------|------------|------------|-----------|
| METTL17 | 0.11245618 | 0.11706635 | conserved  | conserved |
| METTL18 | 0.0326437  | 0.07779451 | conserved  | conserved |
| METTL22 | 0.20311954 | 0.25367841 | conserved  | conserved |
| METTL25 | 0.64582986 | 0.06159942 | conserved  | conserved |
| METTL4  | 0.38018471 | 0.02368433 | conserved  | conserved |
| METTL6  | 0.36174911 | 0.26233489 | conserved  | conserved |
| METTL9  | 0.98378778 | 2.0598868  | conserved  | conserved |
| MEX3B   | 0.01406764 | 0.14221785 | conserved  | conserved |
| MEX3C   | 0.20473983 | 0.38098719 | conserved  | conserved |
| MFAP2   | 0.00749589 | 1.00047375 | conserved  | conserved |
| MFAP3   | 0.21999538 | 0.35675187 | conserved  | conserved |
| MFAP3L  | 1.28432736 | 0.57725355 | monkey-NSC | conserved |
| MFAP4   | 0.00109309 | 0.51150385 | conserved  | conserved |
| MFAP5   | 0.07161464 | 0.00252326 | conserved  | conserved |
| MFGE8   | 4.35410267 | 6.54434246 | monkey-NSC | conserved |
| MFHAS1  | 3.66720018 | 0.22431684 | conserved  | conserved |
| MFN1    | 3.48344122 | 0.38723524 | conserved  | conserved |
| MFN2    | 0.1973819  | 0.13913583 | conserved  | conserved |
| MFNG    | 0.00380545 | 0.04858848 | conserved  | conserved |
| MFRP    | 0.0071165  | 0          | conserved  | conserved |
| MFSD1   | 0.32850462 | 0.23505608 | conserved  | conserved |
| MFSD11  | 0.80471797 | 0.25921398 | conserved  | conserved |
| MFSD12  | 0.12247162 | 0.03987167 | conserved  | conserved |
| MFSD2A  | 0.01183404 | 0.05779816 | conserved  | conserved |
| MFSD2B  | 0.00462996 | 0          | conserved  | conserved |
| MFSD5   | 0.02536543 | 0.16377257 | conserved  | conserved |
| MFSD6   | 0.2682139  | 0.09482949 | conserved  | conserved |
| MFSD8   | 0.54482805 | 0.14556392 | conserved  | conserved |
| MGA     | 1.58048381 | 0.57271215 | conserved  | conserved |
| MGAM    | 0.05711581 | 0          | conserved  | conserved |
| MGARP   | 0.01485763 | 0.00638927 | conserved  | conserved |
| MGAT1   | 0.15566996 | 0.31554434 | conserved  | conserved |
| MGAT3   | 0.32639131 | 0.1058308  | conserved  | conserved |
| MGAT4A  | 0.5014259  | 0.01572108 | conserved  | conserved |
| MGAT4B  | 0.19773789 | 0.1768391  | conserved  | conserved |
| MGAT4C  | 0.2517224  | 0.00811147 | conserved  | conserved |
| MGAT4D  | 0.06932822 | 0          | conserved  | conserved |
| MGAT5   | 1.1517717  | 0.27945104 | conserved  | conserved |
| MGAT5B  | 0.08402997 | 0.03595214 | conserved  | conserved |
| MGLL    | 3.39217066 | 2.07299795 | monkey-NSC | conserved |
| MGME1   | 0.23201617 | 0.12797731 | conserved  | conserved |

|          |            |            |            |           |
|----------|------------|------------|------------|-----------|
| MGMT     | 1.106034   | 0.04157182 | conserved  | conserved |
| MGP      | 0.00451308 | 0.0127843  | conserved  | conserved |
| MGRN1    | 0.48816596 | 0.42715323 | conserved  | conserved |
| MGST1    | 0.23812124 | 0.90080528 | conserved  | conserved |
| MGST2    | 0.05357274 | 0          | conserved  | conserved |
| MGST3    | 0.61619858 | 0.40876481 | conserved  | conserved |
| MIA3     | 0.4933048  | 0.46113778 | conserved  | conserved |
| MIB2     | 0.24223465 | 0.19456238 | conserved  | conserved |
| MICAL1   | 0.02250135 | 0.17239965 | conserved  | conserved |
| MICAL2   | 0.20738361 | 0.1677448  | conserved  | conserved |
| MICALL2  | 0.16254794 | 0.00919691 | conserved  | conserved |
| MICU1    | 1.21919675 | 0.3811335  | conserved  | conserved |
| MICU2    | 1.41684538 | 0.23088616 | conserved  | conserved |
| MICU3    | 0.93828179 | 0.27433865 | conserved  | conserved |
| MID1     | 1.48606978 | 0.50161107 | conserved  | conserved |
| MID2     | 0.28438309 | 0.10948038 | conserved  | conserved |
| MIDN     | 0.02352139 | 0.42639691 | conserved  | conserved |
| MIEF1    | 0.36662783 | 0.08560106 | conserved  | conserved |
| MIEF2    | 0.04518278 | 0.06182198 | conserved  | conserved |
| MIER1    | 1.06137118 | 0.75621604 | conserved  | conserved |
| MIER2    | 0.24931472 | 0.17075031 | conserved  | conserved |
| MIER3    | 0.17856937 | 0.20268345 | conserved  | conserved |
| MIIP     | 0.27521141 | 0.25748517 | conserved  | conserved |
| MILR1    | 0.02209852 | 0.08169702 | conserved  | conserved |
| MINK1    | 1.98200373 | 0.23841966 | conserved  | conserved |
| MIOS     | 0.33799234 | 0.1033552  | conserved  | conserved |
| MIOX     | 0          | 0          | conserved  | conserved |
| MIPEP    | 1.03642645 | 0.16346633 | conserved  | conserved |
| MIPOL1   | 1.70513412 | 0.14895446 | monkey-NSC | conserved |
| MIS12    | 0.06349082 | 0.16535869 | conserved  | conserved |
| MIS18A   | 0.06617003 | 0.15695001 | conserved  | conserved |
| MIS18BP1 | 0.53991142 | 0.01812694 | conserved  | conserved |
| MISP     | 0.01181452 | 0          | conserved  | conserved |
| MITD1    | 0.14357864 | 0.2200297  | conserved  | conserved |
| MITF     | 1.07244669 | 0.02260013 | conserved  | conserved |
| MKI67    | 0.00212427 | 0.0523644  | conserved  | conserved |
| MKKS     | 0.24313255 | 0.59998614 | conserved  | conserved |
| MKLN1    | 4.96256267 | 0.93745916 | conserved  | conserved |
| MKNK1    | 0.44278352 | 0.18113989 | conserved  | conserved |
| MKNK2    | 0.41976658 | 0.11243249 | conserved  | conserved |
| MKRN1    | 0.12961018 | 0.73289669 | conserved  | conserved |



|         |            |            |            |           |
|---------|------------|------------|------------|-----------|
| MKRN2   | 0.39610712 | 0.28768789 | conserved  | conserved |
| MKRN2OS | 0.00998029 | 0.00308903 | conserved  | conserved |
| MKS1    | 0.11437531 | 0.15569797 | conserved  | conserved |
| MKX     | 0.04057572 | 0.02322666 | conserved  | conserved |
| MLC1    | 2.26886253 | 2.94194611 | conserved  | conserved |
| MLF1    | 0.20870255 | 0.06354355 | conserved  | conserved |
| MLF2    | 0.27412612 | 3.22728012 | mouse-RGL  | conserved |
| MLH1    | 0.20885992 | 0.08795929 | conserved  | conserved |
| MLH3    | 0.79286    | 0.11233049 | conserved  | conserved |
| MLLT1   | 0.5282116  | 0.18171147 | conserved  | conserved |
| MLLT10  | 5.34322998 | 0.61795692 | conserved  | conserved |
| MLLT3   | 5.8665498  | 0.58766653 | conserved  | conserved |
| MLLT6   | 0.42154832 | 0.29684936 | conserved  | conserved |
| MLPH    | 0.0108655  | 0          | conserved  | conserved |
| MLST8   | 0.08864859 | 0.12445876 | conserved  | conserved |
| MLX     | 0.08258711 | 0.22840769 | conserved  | conserved |
| MLXIP   | 0.52016002 | 0.05723073 | conserved  | conserved |
| MMAA    | 0.15326127 | 0.12458639 | conserved  | conserved |
| MMAB    | 0.51395579 | 0.22256839 | conserved  | conserved |
| MMACHC  | 0.03136482 | 0.10291234 | conserved  | conserved |
| MMADHC  | 0.13892621 | 0.47911138 | conserved  | conserved |
| MMD     | 0.35263733 | 0.80517312 | conserved  | conserved |
| MMD2    | 12.0695658 | 8.85231646 | monkey-NSC | conserved |
| MME     | 0.01206805 | 0.04767443 | conserved  | conserved |
| MMEL1   | 0.00331415 | 0          | conserved  | conserved |
| MMP11   | 0.02047419 | 0.01621745 | conserved  | conserved |
| MMP12   | 0          | 0          | conserved  | conserved |
| MMP13   | 0          | 0          | conserved  | conserved |
| MMP14   | 0.05203886 | 0.62145511 | conserved  | conserved |
| MMP15   | 0.11023787 | 0.17491405 | conserved  | conserved |
| MMP16   | 2.28871892 | 0.20957648 | conserved  | conserved |
| MMP17   | 0.09280758 | 0.02278313 | conserved  | conserved |
| MMP2    | 0.00285081 | 0.00905896 | conserved  | conserved |
| MMP20   | 0.03264546 | 0          | conserved  | conserved |
| MMP21   | 0.00912408 | 0          | conserved  | conserved |
| MMP24   | 0.22796729 | 0.01077027 | conserved  | conserved |
| MMP27   | 0.00614641 | 0          | conserved  | conserved |
| MMP28   | 0.16949183 | 0          | conserved  | conserved |
| MMP3    | 0.00402265 | 0          | conserved  | conserved |
| MMP7    | 0.00353503 | 0          | conserved  | conserved |
| MMP8    | 0          | 0          | conserved  | conserved |

|           |            |            |            |           |
|-----------|------------|------------|------------|-----------|
| MMP9      | 0.02695839 | 0          | conserved  | conserved |
| MMRN1     | 0.01197494 | 0          | conserved  | conserved |
| MMS19     | 0.50307196 | 0.1303248  | conserved  | conserved |
| MMS22L    | 0.47906266 | 0.10160398 | conserved  | conserved |
| MNAT1     | 2.20803172 | 0.31372632 | conserved  | conserved |
| MNS1      | 0.04160611 | 0.07495907 | conserved  | conserved |
| MOAP1     | 0.03618688 | 0          | conserved  | conserved |
| MOBP      | 0.23314652 | 0.03898792 | conserved  | conserved |
| MOCOS     | 0.06965747 | 0.01062062 | conserved  | conserved |
| MOCS1     | 0.08010532 | 0.06178776 | conserved  | conserved |
| MOG       | 0.28900743 | 0.01311546 | conserved  | conserved |
| MOGAT1    | 0.01686356 | 0.00737011 | conserved  | conserved |
| MOGAT2    | 0.00709189 | 0          | conserved  | conserved |
| MOK       | 1.84459297 | 0.1940474  | monkey-NSC | conserved |
| MON1A     | 0.33032311 | 0.09190432 | conserved  | conserved |
| MON1B     | 0.05939599 | 0.1198015  | conserved  | conserved |
| MON2      | 2.15995837 | 0.20174686 | conserved  | conserved |
| MORC3     | 0.77825515 | 0.17188686 | conserved  | conserved |
| MORN1     | 0.24481081 | 0.11300513 | conserved  | conserved |
| MORN2     | 0.14310251 | 0.57803605 | conserved  | conserved |
| MORN3     | 0.06818808 | 0          | conserved  | conserved |
| MORN4     | 0.1371487  | 0.27097704 | conserved  | conserved |
| MORN5     | 0.00862989 | 0.039277   | conserved  | conserved |
| MOS       | 0          | 0          | conserved  | conserved |
| MOSPD2    | 0.20175557 | 0.20268213 | conserved  | conserved |
| MOSPD3    | 0.04520589 | 0.36233635 | conserved  | conserved |
| MOV10L1   | 0.37364694 | 0          | conserved  | conserved |
| MOXD1     | 2.13201635 | 0.00354285 | monkey-NSC | conserved |
| MPC1      | 0.40796332 | 3.50716002 | mouse-RGL  | conserved |
| MPDU1     | 0.16932434 | 0.54042891 | conserved  | conserved |
| MPDZ      | 2.00846085 | 0.26892045 | conserved  | conserved |
| MPHOSPH10 | 0.29273058 | 0.22985451 | conserved  | conserved |
| MPHOSPH8  | 0.85267713 | 1.03474087 | conserved  | conserved |
| MPHOSPH9  | 0.82905    | 0.16590825 | conserved  | conserved |
| MPL       | 0.01004177 | 0          | conserved  | conserved |
| MPND      | 0.09200525 | 1.04740164 | conserved  | conserved |
| MPO       | 0.009291   | 0          | conserved  | conserved |
| MPP2      | 0.44347888 | 0.16656735 | conserved  | conserved |
| MPP3      | 0.14539348 | 0.06300094 | conserved  | conserved |
| MPP4      | 0.13298426 | 0.00133335 | conserved  | conserved |
| MPP5      | 0.62819516 | 0.43514176 | conserved  | conserved |

|        |            |            |           |           |
|--------|------------|------------|-----------|-----------|
| MPP6   | 2.19293672 | 0.39752301 | conserved | conserved |
| MPP7   | 0.36502978 | 0.04064191 | conserved | conserved |
| MPPED2 | 2.81355772 | 1.00295429 | conserved | conserved |
| MPV17  | 0.51603923 | 1.11054997 | conserved | conserved |
| MPZ    | 0.00860508 | 0.003838   | conserved | conserved |
| MPZL1  | 1.07777909 | 0.75279091 | conserved | conserved |
| MR1    | 0.20988537 | 0.50120728 | conserved | conserved |
| MRAP   | 0.01489302 | 0          | conserved | conserved |
| MRAS   | 1.32223402 | 1.03210174 | conserved | conserved |
| MRC2   | 0.07953339 | 0.01024548 | conserved | conserved |
| MRGBP  | 0.0810868  | 0.33115391 | conserved | conserved |
| MRGPRF | 0.00411126 | 0          | conserved | conserved |
| MRI1   | 0.09148024 | 0.14970914 | conserved | conserved |
| MRO    | 0.16124424 | 0.7258938  | conserved | conserved |
| MROH1  | 0.7522347  | 0.12223075 | conserved | conserved |
| MROH2A | 0.00497315 | 0          | conserved | conserved |
| MROH2B | 0.02011851 | 0          | conserved | conserved |
| MROH5  | 0.00384074 | 0.003489   | conserved | conserved |
| MROH8  | 0.31349123 | 0          | conserved | conserved |
| MROH9  | 0.00443185 | 0          | conserved | conserved |
| MRPL11 | 0.07859981 | 1.20278531 | mouse-RGL | conserved |
| MRPL13 | 0.15009305 | 0.83569139 | conserved | conserved |
| MRPL15 | 0.22006257 | 0.71237373 | conserved | conserved |
| MRPL17 | 0.07974542 | 1.79538162 | mouse-RGL | conserved |
| MRPL19 | 0.19532306 | 0.40963752 | conserved | conserved |
| MRPL21 | 0.04522091 | 0.91795949 | conserved | conserved |
| MRPL22 | 0.19605619 | 0.42703735 | conserved | conserved |
| MRPL24 | 0.02626882 | 1.02158873 | conserved | conserved |
| MRPL28 | 0.01020113 | 1.59860004 | mouse-RGL | conserved |
| MRPL3  | 0.38747732 | 0.54491325 | conserved | conserved |
| MRPL35 | 0.15993323 | 0.49947031 | conserved | conserved |
| MRPL37 | 0.14754805 | 0.34830398 | conserved | conserved |
| MRPL39 | 0.81057324 | 0.34439863 | conserved | conserved |
| MRPL4  | 0.19958086 | 0.70177955 | conserved | conserved |
| MRPL42 | 0.26844944 | 2.31513363 | conserved | conserved |
| MRPL44 | 0.0571351  | 0.12852248 | conserved | conserved |
| MRPL46 | 0.07599056 | 0.32127856 | conserved | conserved |
| MRPL52 | 0.07660183 | 3.02172322 | mouse-RGL | conserved |
| MRPL54 | 0.08302151 | 1.25065143 | mouse-RGL | conserved |
| MRPL57 | 0.02775215 | 1.2022632  | mouse-RGL | conserved |
| MRPL9  | 0.03937655 | 0.31458177 | conserved | conserved |

|         |            |            |           |           |
|---------|------------|------------|-----------|-----------|
| MRPS11  | 0.20074851 | 1.02642659 | conserved | conserved |
| MRPS16  | 0.23189779 | 1.27298124 | conserved | conserved |
| MRPS18A | 0.17339094 | 1.01456195 | conserved | conserved |
| MRPS18B | 0.13091476 | 0.31086301 | conserved | conserved |
| MRPS2   | 0          | 0.18753456 | conserved | conserved |
| MRPS23  | 0.0906517  | 0.63178497 | mouse-RGL | conserved |
| MRPS25  | 0.2683811  | 0.64777641 | conserved | conserved |
| MRPS27  | 0.44412634 | 0.07241568 | conserved | conserved |
| MRPS30  | 0.02849838 | 0.33408324 | conserved | conserved |
| MRPS31  | 0.63664134 | 0.13136182 | conserved | conserved |
| MRPS34  | 0.03991175 | 0.89214727 | conserved | conserved |
| MRPS6   | 0.14365073 | 1.03570316 | mouse-RGL | conserved |
| MRPS7   | 0.11710813 | 0.89713797 | mouse-RGL | conserved |
| MRPS9   | 0.5020898  | 0.4839783  | conserved | conserved |
| MRRF    | 0.5493658  | 0.2707555  | conserved | conserved |
| MRS2    | 0.15949118 | 0.0445223  | conserved | conserved |
| MS4A1   | 0.00155639 | 0          | conserved | conserved |
| MS4A13  | 0.00253138 | 0          | conserved | conserved |
| MS4A14  | 0.00104247 | 0          | conserved | conserved |
| MS4A15  | 0.00243159 | 0          | conserved | conserved |
| MS4A18  | 0.00090465 | 0          | conserved | conserved |
| MS4A2   | 0.00112884 | 0          | conserved | conserved |
| MS4A5   | 0.00692411 | 0          | conserved | conserved |
| MS4A7   | 0.04074563 | 0          | conserved | conserved |
| MSANTD1 | 0.02383003 | 0          | conserved | conserved |
| MSANTD4 | 0.11844767 | 0.35613618 | conserved | conserved |
| MSC     | 0.00360179 | 0.02194081 | conserved | conserved |
| MSH2    | 0.26660673 | 0.15993053 | conserved | conserved |
| MSH3    | 1.6847802  | 0.25809729 | conserved | conserved |
| MSH4    | 0.03139101 | 0          | conserved | conserved |
| MSH6    | 0.23798106 | 0.13638607 | conserved | conserved |
| MSI1    | 0.45614992 | 1.18671761 | conserved | conserved |
| MSL1    | 0.77242014 | 0.58945017 | conserved | conserved |
| MSL2    | 0.7295901  | 0.29337733 | conserved | conserved |
| MSMB    | 0          | 0          | conserved | conserved |
| MSMO1   | 0.90039352 | 1.74162851 | conserved | conserved |
| MSN     | 0.25159683 | 0.74473659 | conserved | conserved |
| MSR1    | 0.02149035 | 0          | conserved | conserved |
| MSRB2   | 0.28373556 | 0.20739407 | conserved | conserved |
| MSRB3   | 1.73089788 | 0.0079021  | conserved | conserved |
| MST1R   | 0.59881628 | 0          | conserved | conserved |

|         |            |            |            |           |
|---------|------------|------------|------------|-----------|
| MSTN    | 0          | 0.00381636 | conserved  | conserved |
| MT4     | 0.00126386 | 0          | conserved  | conserved |
| MTA1    | 0.59476913 | 0.47816907 | conserved  | conserved |
| MTA2    | 0.03759311 | 0.54096273 | conserved  | conserved |
| MTA3    | 1.4609182  | 0.10117458 | conserved  | conserved |
| MTBP    | 0.15069458 | 0.069694   | conserved  | conserved |
| MTCH2   | 1.72164343 | 1.73842363 | conserved  | conserved |
| MTCL1   | 0.35690065 | 0.03838566 | conserved  | conserved |
| MTCP1   | 0.01090873 | 0.00859922 | conserved  | conserved |
| MTDH    | 1.6504327  | 2.03540839 | conserved  | conserved |
| MTERF2  | 0.26846311 | 0.11627865 | conserved  | conserved |
| MTERF3  | 0.10454265 | 0.20878047 | conserved  | conserved |
| MTERF4  | 0.24753387 | 0.11804054 | conserved  | conserved |
| MTF1    | 0.34519851 | 0.19066698 | conserved  | conserved |
| MTF2    | 0.82862075 | 0.44624849 | conserved  | conserved |
| MTFR1   | 0.1475444  | 0.22292991 | conserved  | conserved |
| MTFR1L  | 0.12314398 | 1.29768855 | mouse-RGL  | conserved |
| MTG2    | 0.71604116 | 0.33367395 | conserved  | conserved |
| MTHFD1L | 0.81603982 | 0.01684182 | conserved  | conserved |
| MTHFD2  | 0.02720728 | 0.20317234 | conserved  | conserved |
| MTHFD2L | 0.39533592 | 0.75386497 | conserved  | conserved |
| MTHFR   | 0.22064668 | 0.04641032 | conserved  | conserved |
| MTHFSD  | 0.50724974 | 0.27755737 | conserved  | conserved |
| MTIF2   | 0.41690011 | 0.29566849 | conserved  | conserved |
| MTIF3   | 0.33627706 | 0.09837553 | conserved  | conserved |
| MTMR10  | 1.63660272 | 0.21083368 | monkey-NSC | conserved |
| MTMR11  | 0.0286873  | 0.07308623 | conserved  | conserved |
| MTMR12  | 0.81141462 | 0.0734587  | conserved  | conserved |
| MTMR14  | 0.49724502 | 0.10197072 | conserved  | conserved |
| MTMR2   | 0.55103725 | 0.30445425 | conserved  | conserved |
| MTMR3   | 2.46933113 | 0.15849415 | monkey-NSC | conserved |
| MTMR4   | 0.42795945 | 0.19468278 | conserved  | conserved |
| MTMR6   | 0.51501683 | 0.31534955 | conserved  | conserved |
| MTMR7   | 1.04883178 | 0.02814156 | conserved  | conserved |
| MTMR9   | 0.3011281  | 0.04531032 | conserved  | conserved |
| MTNR1A  | 0.00708123 | 0          | conserved  | conserved |
| MTO1    | 0.29953527 | 0.13870039 | conserved  | conserved |
| MTOR    | 1.0620649  | 0.1921136  | conserved  | conserved |
| MTPAP   | 0.43542962 | 0.19568932 | conserved  | conserved |
| MTPN    | 0.44493386 | 1.78196193 | conserved  | conserved |
| MTR     | 0.688436   | 0.03097183 | conserved  | conserved |

|         |            |            |            |           |
|---------|------------|------------|------------|-----------|
| MTRR    | 0.25183544 | 0.06033262 | conserved  | conserved |
| MTSS1   | 2.14171384 | 0.5803615  | conserved  | conserved |
| MTTP    | 0.05015111 | 0.39847924 | conserved  | conserved |
| MTURN   | 0.19828385 | 0.26147161 | conserved  | conserved |
| MTUS1   | 1.59942837 | 0.15995119 | conserved  | conserved |
| MTUS2   | 0.63280742 | 0.02281647 | conserved  | conserved |
| MTX2    | 0.84632412 | 0.68121906 | conserved  | conserved |
| MTX3    | 0.08334056 | 0.1255831  | conserved  | conserved |
| MUC15   | 0.01167768 | 0          | conserved  | conserved |
| MUC20   | 0          | 0          | conserved  | conserved |
| MUL1    | 0.16900653 | 0.17623047 | conserved  | conserved |
| MUS81   | 0.27826357 | 0.23015029 | conserved  | conserved |
| MUSK    | 0.06444324 | 0          | conserved  | conserved |
| MVB12A  | 0.54876415 | 0.32694203 | conserved  | conserved |
| MVB12B  | 1.95166365 | 0.24235645 | conserved  | conserved |
| MVD     | 0.22521046 | 0.50724263 | conserved  | conserved |
| MVK     | 0.13370601 | 0.5510841  | conserved  | conserved |
| MVP     | 0.38902159 | 0.10127384 | conserved  | conserved |
| MXD1    | 0.05968664 | 0.14868685 | conserved  | conserved |
| MXI1    | 2.92167868 | 0.35576025 | conserved  | conserved |
| MYADM   | 0.02925427 | 0.04567458 | conserved  | conserved |
| MYADML2 | 0          | 0          | conserved  | conserved |
| MYBBP1A | 0.11852261 | 0.27824733 | conserved  | conserved |
| MYBL1   | 0.02309073 | 0          | conserved  | conserved |
| MYBL2   | 0.00474586 | 0.02039523 | conserved  | conserved |
| MYBPC1  | 2.57253369 | 0.01117593 | monkey-NSC | conserved |
| MYBPC2  | 0.06861016 | 0          | conserved  | conserved |
| MYBPC3  | 0          | 0          | conserved  | conserved |
| MYBPH   | 0.0009391  | 0.00995341 | conserved  | conserved |
| MYC     | 0.00911207 | 0.02194923 | conserved  | conserved |
| MYCBP2  | 5.77268541 | 1.19272583 | conserved  | conserved |
| MYCBPAP | 0.38362812 | 0          | conserved  | conserved |
| MYCL    | 0.01402222 | 0.20641095 | conserved  | conserved |
| MYCT1   | 0.00436665 | 0          | conserved  | conserved |
| MYD88   | 0.01133173 | 0.03150033 | conserved  | conserved |
| MYDGF   | 0.17816973 | 1.15364865 | conserved  | conserved |
| MYF6    | 0.0008741  | 0          | conserved  | conserved |
| MYH10   | 1.23538662 | 0.39774231 | conserved  | conserved |
| MYH11   | 0.09389303 | 0.0072089  | conserved  | conserved |
| MYH13   | 0.01592558 | 0          | conserved  | conserved |
| MYH15   | 0.04010283 | 0          | conserved  | conserved |

|        |            |            |            |                      |
|--------|------------|------------|------------|----------------------|
| MYH7   | 0.00582974 | 0.07229604 | conserved  | conserved            |
| MYH9   | 0.40947345 | 0.0420239  | conserved  | conserved            |
| MYL10  | 0          | 0          | conserved  | conserved            |
| MYL2   | 0          | 0.02775551 | conserved  | conserved            |
| MYL3   | 0.001976   | 0          | conserved  | conserved            |
| MYL6B  | 0.11596003 | 0.13522904 | conserved  | conserved            |
| MYL7   | 0.00222306 | 0          | conserved  | conserved            |
| MYL9   | 0.0050949  | 2.72468604 | conserved  | conserved            |
| MYLIP  | 0.10091764 | 0.01143775 | conserved  | conserved            |
| MYLK   | 1.00329915 | 0.00865542 | monkey-NSC | monkey-NSC1-enriched |
| MYLK2  | 0          | 0          | conserved  | conserved            |
| MYLK4  | 0.03781645 | 0          | conserved  | conserved            |
| MYLPF  | 0.0013548  | 0.01837334 | conserved  | conserved            |
| MYNN   | 0.22837037 | 0.3431281  | conserved  | conserved            |
| MYO18A | 1.36462418 | 0.39621714 | conserved  | conserved            |
| MYO18B | 0.04826283 | 0          | conserved  | conserved            |
| MYO19  | 0.1597873  | 0.0347987  | conserved  | conserved            |
| MYO1A  | 0.04188844 | 0.00642178 | conserved  | conserved            |
| MYO1B  | 0.0682603  | 0.02381583 | conserved  | conserved            |
| MYO1C  | 0.05601913 | 0.04838921 | conserved  | conserved            |
| MYO1D  | 0.78043575 | 0          | conserved  | conserved            |
| MYO1E  | 1.48254872 | 0.1124374  | conserved  | conserved            |
| MYO1G  | 0.0099358  | 0.01425551 | conserved  | conserved            |
| MYO3A  | 0.03084514 | 0          | conserved  | conserved            |
| MYO3B  | 0.09384658 | 0          | conserved  | conserved            |
| MYO5A  | 2.01667273 | 0.17919645 | monkey-NSC | conserved            |
| MYO5C  | 0.1125452  | 0          | conserved  | conserved            |
| MYO6   | 3.4505043  | 0.63986932 | conserved  | conserved            |
| MYO7A  | 0.02715489 | 0          | conserved  | conserved            |
| MYO9A  | 3.45549532 | 0.25014968 | conserved  | conserved            |
| MYOC   | 0          | 0.00841624 | conserved  | conserved            |
| MYOCD  | 0.01084502 | 0.00850607 | conserved  | conserved            |
| MYOD1  | 0          | 0          | conserved  | conserved            |
| MYOF   | 0.03664055 | 0          | conserved  | conserved            |
| MYOG   | 0.00112272 | 0          | conserved  | conserved            |
| MYOM1  | 1.17845821 | 0.00415835 | monkey-NSC | conserved            |
| MYOM2  | 0.53056992 | 0          | conserved  | conserved            |
| MYOM3  | 0.00228581 | 0.09049664 | conserved  | conserved            |
| MYOZ1  | 0.00679305 | 0.00525704 | conserved  | conserved            |
| MYOZ2  | 0.04638107 | 0.00774305 | conserved  | conserved            |
| MYOZ3  | 0.01650631 | 0          | conserved  | conserved            |

|          |            |            |            |           |
|----------|------------|------------|------------|-----------|
| MYPN     | 0.02982218 | 0.00115849 | conserved  | conserved |
| MYRF     | 0.03828637 | 0          | conserved  | conserved |
| MYRFL    | 0.01759934 | 0          | conserved  | conserved |
| MYRIP    | 2.30550392 | 0.0494624  | monkey-NSC | conserved |
| MYSM1    | 0.68170417 | 0.45831301 | conserved  | conserved |
| N4BP1    | 0.94423738 | 0.23633713 | conserved  | conserved |
| N4BP2L2  | 2.61612965 | 1.17726368 | conserved  | conserved |
| N4BP3    | 0          | 0.07694297 | conserved  | conserved |
| N6AMT1   | 0.09016079 | 0.42302566 | conserved  | conserved |
| NAA10    | 0.19168781 | 0.72827414 | conserved  | conserved |
| NAA15    | 0.94065698 | 0.71845334 | conserved  | conserved |
| NAA16    | 0.58498186 | 0.20070021 | conserved  | conserved |
| NAA25    | 1.16588941 | 0.15292923 | conserved  | conserved |
| NAA30    | 0.18093127 | 0.2395019  | conserved  | conserved |
| NAA35    | 1.11259783 | 0.6024331  | conserved  | conserved |
| NAA38    | 0.19433576 | 1.30818788 | mouse-RGL  | conserved |
| NAA40    | 0.08639616 | 0.23741204 | conserved  | conserved |
| NAA50    | 0.45608126 | 1.39156137 | conserved  | conserved |
| NAA60    | 0.69519548 | 0.25267052 | conserved  | conserved |
| NAAA     | 0.2620149  | 0.86265551 | conserved  | conserved |
| NAALAD2  | 1.01380174 | 0          | conserved  | conserved |
| NAALADL2 | 7.13579136 | 0.00969688 | monkey-NSC | conserved |
| NAB1     | 0.44772672 | 0.24974669 | conserved  | conserved |
| NAB2     | 0.0898812  | 0.0621898  | conserved  | conserved |
| NABP1    | 0.02775687 | 0.06173208 | conserved  | conserved |
| NACAD    | 0.01222819 | 0.04887171 | conserved  | conserved |
| NACC1    | 0.06793221 | 0.36700152 | conserved  | conserved |
| NACC2    | 1.89381204 | 0.76040421 | monkey-NSC | conserved |
| NADK     | 0.35093112 | 1.11878549 | conserved  | conserved |
| NADK2    | 1.24845171 | 0.49563551 | monkey-NSC | conserved |
| NADSYN1  | 0.21570419 | 0.03523816 | conserved  | conserved |
| NAE1     | 0.46328674 | 0.48272317 | conserved  | conserved |
| NAGA     | 0.01043638 | 0.1278875  | conserved  | conserved |
| NAGK     | 0.32702645 | 0.51094389 | conserved  | conserved |
| NAGLU    | 0.24657572 | 0.02433963 | conserved  | conserved |
| NAGPA    | 0.10979174 | 0.07433131 | conserved  | conserved |
| NAGS     | 0.00351596 | 0          | conserved  | conserved |
| NALCN    | 2.80409034 | 0.03408511 | monkey-NSC | conserved |
| NAMPT    | 0.3350754  | 0.39064121 | conserved  | conserved |
| NANOS3   | 0.00132419 | 0.12402838 | conserved  | conserved |
| NANP     | 0.07288149 | 0.00787915 | conserved  | conserved |



|         |            |            |            |           |
|---------|------------|------------|------------|-----------|
| NANS    | 0.0468795  | 0.34923095 | conserved  | conserved |
| NAPA    | 0.44827474 | 0.9321197  | conserved  | conserved |
| NAPB    | 0.93737374 | 0.16684701 | conserved  | conserved |
| NAPEPLD | 1.08288376 | 0.02685709 | monkey-NSC | conserved |
| NAPRT   | 0.00145574 | 0.26619466 | conserved  | conserved |
| NARF    | 0.20446163 | 0.13876705 | conserved  | conserved |
| NARS2   | 0.6864148  | 0.16643252 | conserved  | conserved |
| NAT10   | 0.3712312  | 0.09384531 | conserved  | conserved |
| NAT9    | 0.30243652 | 0.26135144 | conserved  | conserved |
| NAV1    | 1.78032981 | 1.64964051 | conserved  | conserved |
| NAV2    | 9.64019045 | 0.80213123 | conserved  | conserved |
| NAV3    | 2.41968598 | 0.03945624 | monkey-NSC | conserved |
| NBAS    | 2.13268281 | 0.0901438  | monkey-NSC | conserved |
| NBEA    | 9.41156364 | 0.26306599 | monkey-NSC | conserved |
| NBEAL1  | 1.46157107 | 0.3654483  | conserved  | conserved |
| NBEAL2  | 0.05635245 | 0.01485288 | conserved  | conserved |
| NBN     | 0.43983285 | 0.09316161 | conserved  | conserved |
| NBR1    | 0.934286   | 0.47915497 | conserved  | conserved |
| NCALD   | 0.59858985 | 0.55078239 | conserved  | conserved |
| NCAM1   | 15.1570459 | 2.04468231 | conserved  | conserved |
| NCAM2   | 20.980118  | 0.14148538 | conserved  | conserved |
| NCAPD2  | 0.12601118 | 0.10323988 | conserved  | conserved |
| NCAPD3  | 0.66668855 | 0.15971529 | conserved  | conserved |
| NCAPG   | 0.0059482  | 0.02520629 | conserved  | conserved |
| NCAPG2  | 0.16139849 | 0.0521648  | conserved  | conserved |
| NCAPH   | 0.01040335 | 0.06738185 | conserved  | conserved |
| NCAPH2  | 0.20627776 | 0.56062334 | conserved  | conserved |
| NCBP1   | 0.72980364 | 0.19611956 | conserved  | conserved |
| NCBP2   | 0.19437434 | 0.56759075 | conserved  | conserved |
| NCDN    | 0.34860001 | 0.51958953 | conserved  | conserved |
| NCEH1   | 1.54580275 | 0.06944396 | monkey-NSC | conserved |
| NCF1    | 0.04725321 | 0.00816786 | conserved  | conserved |
| NCF2    | 0.01181425 | 0          | conserved  | conserved |
| NCF4    | 0.00163503 | 0          | conserved  | conserved |
| NCK2    | 0.60905564 | 0.02143391 | conserved  | conserved |
| NCKAP1  | 4.02443844 | 0.75072705 | conserved  | conserved |
| NCKAP5  | 13.3888219 | 0.45301811 | conserved  | conserved |
| NCKAP5L | 0.87798589 | 0.04597534 | conserved  | conserved |
| NCKIPSD | 0.06256066 | 0.07386306 | conserved  | conserved |
| NCL     | 0.36930696 | 2.6176252  | mouse-RGL  | conserved |
| NCLN    | 0.13298747 | 0.2995141  | conserved  | conserved |

|          |            |            |            |           |
|----------|------------|------------|------------|-----------|
| NCOA1    | 6.33978878 | 0.69763045 | conserved  | conserved |
| NCOA2    | 3.08684762 | 0.25794841 | monkey-NSC | conserved |
| NCOA3    | 0.36270684 | 0.11005754 | conserved  | conserved |
| NCOA4    | 0.22675687 | 0.01201038 | conserved  | conserved |
| NCOA5    | 0.39950295 | 0.20927521 | conserved  | conserved |
| NCOA6    | 2.02275097 | 0.32324695 | conserved  | conserved |
| NCOA7    | 1.11456596 | 0.192219   | conserved  | conserved |
| NCOR1    | 4.94522369 | 1.84928777 | conserved  | conserved |
| NCR1     | 0.00310366 | 0          | conserved  | conserved |
| NCSTN    | 0.18368005 | 0.18888473 | conserved  | conserved |
| NDC1     | 0.35145762 | 0.16360059 | conserved  | conserved |
| NDC80    | 0.0119059  | 0.00105521 | conserved  | conserved |
| NDE1     | 0.46087714 | 0.40575563 | conserved  | conserved |
| NDEL1    | 0.19158915 | 0.38982838 | conserved  | conserved |
| NDFIP1   | 1.56783608 | 0.16045798 | conserved  | conserved |
| NDFIP2   | 0.34705289 | 0.9195345  | conserved  | conserved |
| NDNF     | 0.03180401 | 0.02308912 | conserved  | conserved |
| NDRG1    | 0.38176876 | 0.03449156 | conserved  | conserved |
| NDRG2    | 2.80655778 | 5.87569835 | monkey-NSC | conserved |
| NDRG4    | 1.2069782  | 0.190443   | conserved  | conserved |
| NDST3    | 0.48541826 | 0.00643937 | conserved  | conserved |
| NDST4    | 0.1329725  | 0          | conserved  | conserved |
| NDUFA1   | 0.09207071 | 2.15538196 | conserved  | conserved |
| NDUFA10  | 0.91699853 | 1.77251761 | conserved  | conserved |
| NDUFA12  | 0.37206622 | 3.45278909 | conserved  | conserved |
| NDUFA4L2 | 0.00790708 | 0.00616843 | conserved  | conserved |
| NDUFA5   | 0.32690033 | 3.05741922 | conserved  | conserved |
| NDUFAF1  | 0.13416478 | 0.24898908 | conserved  | conserved |
| NDUFAF2  | 1.70868005 | 0.5309674  | conserved  | conserved |
| NDUFAF3  | 0.04307062 | 0.50963674 | conserved  | conserved |
| NDUFAF4  | 0.12976229 | 0.63432759 | conserved  | conserved |
| NDUFAF5  | 0.77927836 | 0.24781658 | conserved  | conserved |
| NDUFAF6  | 0.29712428 | 0.16723419 | conserved  | conserved |
| NDUFAF7  | 0.33634509 | 0.19281457 | conserved  | conserved |
| NDUFB10  | 0.14341706 | 2.61950148 | conserved  | conserved |
| NDUFB2   | 0.19667007 | 3.13022285 | mouse-RGL  | conserved |
| NDUFB4   | 0.09035783 | 2.90988317 | mouse-RGL  | conserved |
| NDUFB5   | 0.2557941  | 2.68854423 | mouse-RGL  | conserved |
| NDUFB9   | 0.22553714 | 3.76494377 | conserved  | conserved |
| NDUFC2   | 0.3463565  | 11.1160624 | mouse-RGL  | conserved |
| NDUFS1   | 0.74832642 | 0.36058023 | conserved  | conserved |

|        |            |            |            |           |
|--------|------------|------------|------------|-----------|
| NDUFS3 | 0.306709   | 1.18615977 | conserved  | conserved |
| NDUFS4 | 1.17969062 | 1.44701681 | conserved  | conserved |
| NDUFS6 | 0.13485578 | 3.60630606 | mouse-RGL  | conserved |
| NDUFS8 | 0.29835023 | 1.66549878 | conserved  | conserved |
| NDUFV1 | 0.17600949 | 0.83814652 | conserved  | conserved |
| NDUFV3 | 0.22977977 | 2.66131731 | conserved  | conserved |
| NEBL   | 10.301923  | 0.25627159 | monkey-NSC | conserved |
| NECAB1 | 1.25132731 | 0.00863639 | conserved  | conserved |
| NECAB2 | 0.02588917 | 0.09446087 | conserved  | conserved |
| NECAB3 | 0.07836366 | 0.12586884 | conserved  | conserved |
| NECAP1 | 0.08060045 | 0.24926664 | conserved  | conserved |
| NEDD4  | 0.40198439 | 4.32615733 | conserved  | conserved |
| NEDD4L | 3.86471664 | 0.38747503 | conserved  | conserved |
| NEDD9  | 0.49775783 | 0.20498141 | conserved  | conserved |
| NEFH   | 0.00778763 | 0          | conserved  | conserved |
| NEFL   | 0.24120198 | 0.09018046 | conserved  | conserved |
| NEGR1  | 13.5520414 | 0.41302622 | monkey-NSC | conserved |
| NEIL1  | 0.2239715  | 0.07579195 | conserved  | conserved |
| NEIL2  | 0.16148857 | 0.01637427 | conserved  | conserved |
| NEIL3  | 0.00928908 | 0.01547548 | conserved  | conserved |
| NEK1   | 1.68950249 | 0.22605315 | conserved  | conserved |
| NEK10  | 0.85579697 | 0          | conserved  | conserved |
| NEK2   | 0.01008123 | 0          | conserved  | conserved |
| NEK3   | 0.13616473 | 0.0329566  | conserved  | conserved |
| NEK4   | 0.85417291 | 0.04275872 | conserved  | conserved |
| NEK5   | 0.13220583 | 0.00829577 | conserved  | conserved |
| NEK6   | 1.30710254 | 0.93278894 | conserved  | conserved |
| NEK7   | 1.88339869 | 0.34978896 | conserved  | conserved |
| NEK8   | 0.09442098 | 0.11794446 | conserved  | conserved |
| NEK9   | 0.75266534 | 0.36292798 | conserved  | conserved |
| NELFA  | 0.42318775 | 0.21884014 | conserved  | conserved |
| NELFCD | 0.30886197 | 0.26105356 | conserved  | conserved |
| NELL1  | 2.9130329  | 0.01072878 | conserved  | conserved |
| NELL2  | 4.67891763 | 0.10528635 | conserved  | conserved |
| NEMF   | 1.64549284 | 0.47785339 | conserved  | conserved |
| NENF   | 0.13565521 | 1.47367959 | mouse-RGL  | conserved |
| NEO1   | 2.27994151 | 0.68031384 | conserved  | conserved |
| NEPRO  | 0.14882889 | 0.02544329 | conserved  | conserved |
| NES    | 0.0179069  | 0.39498862 | conserved  | conserved |
| NET1   | 0.23512332 | 0.01510909 | conserved  | conserved |
| NETO1  | 1.86932096 | 0          | monkey-NSC | conserved |

|          |            |            |            |           |
|----------|------------|------------|------------|-----------|
| NETO2    | 1.25785351 | 0.30916106 | conserved  | conserved |
| NEU1     | 0.11868218 | 0.18745704 | conserved  | conserved |
| NEU3     | 0.18492965 | 0.02626278 | conserved  | conserved |
| NEU4     | 0.03921515 | 0          | conserved  | conserved |
| NEURL3   | 0.00522678 | 0          | conserved  | conserved |
| NEUROD1  | 0.04469305 | 0.31458129 | conserved  | conserved |
| NEUROD6  | 0.03210385 | 0.16230867 | conserved  | conserved |
| NEUROG2  | 0          | 0.74053402 | conserved  | conserved |
| NEXN     | 0.09302065 | 0.01075052 | conserved  | conserved |
| NF1      | 4.25356042 | 0.54601645 | monkey-NSC | conserved |
| NF2      | 0.8224426  | 0.19659894 | conserved  | conserved |
| NFAM1    | 0.001385   | 0          | conserved  | conserved |
| NFASC    | 0.67111541 | 0.1054279  | conserved  | conserved |
| NFAT5    | 5.0088273  | 0.44931225 | monkey-NSC | conserved |
| NFATC1   | 0.219735   | 0.08793649 | conserved  | conserved |
| NFATC2   | 0.12804241 | 0.05877877 | conserved  | conserved |
| NFATC2IP | 0.18199479 | 0.15122862 | conserved  | conserved |
| NFATC3   | 1.11963159 | 0.09387381 | conserved  | conserved |
| NFATC4   | 0.004044   | 0.12053795 | conserved  | conserved |
| NFE2L1   | 0.31610827 | 0.37370928 | conserved  | conserved |
| NFE2L2   | 1.84132678 | 0.46948807 | conserved  | conserved |
| NFE2L3   | 0.07647171 | 0.0093554  | conserved  | conserved |
| NFIA     | 21.5522527 | 8.49299346 | conserved  | conserved |
| NFIB     | 6.9161941  | 10.2858258 | conserved  | conserved |
| NFIC     | 1.82558982 | 0.63738089 | monkey-NSC | conserved |
| NFIL3    | 0.0014744  | 0.03944363 | conserved  | conserved |
| NFIX     | 1.87676722 | 5.90207175 | conserved  | conserved |
| NFKB1    | 0.75383787 | 0.31362212 | conserved  | conserved |
| NFKB2    | 0.04955117 | 0.01289142 | conserved  | conserved |
| NFKBIA   | 0.3988056  | 0.99183214 | conserved  | conserved |
| NFKBID   | 0.02995431 | 0.00310545 | conserved  | conserved |
| NFKBIE   | 0.03540586 | 0.05572684 | conserved  | conserved |
| NFKBIL1  | 0.16157714 | 0.28262653 | conserved  | conserved |
| NFRKB    | 0.18201886 | 0.19596966 | conserved  | conserved |
| NFX1     | 1.38826372 | 0.38178237 | conserved  | conserved |
| NFYA     | 0.22566548 | 0.10132575 | conserved  | conserved |
| NFYC     | 0.91257918 | 0.2905214  | conserved  | conserved |
| NGB      | 0          | 0.04689156 | conserved  | conserved |
| NGDN     | 0.15451556 | 0.48515468 | conserved  | conserved |
| NGEF     | 0.20375742 | 0.25146297 | conserved  | conserved |
| NGF      | 0.01088729 | 0.00931509 | conserved  | conserved |

|         |            |            |            |                      |
|---------|------------|------------|------------|----------------------|
| NGFR    | 0.00134483 | 0          | conserved  | conserved            |
| NGLY1   | 0.64016809 | 0.26239841 | conserved  | conserved            |
| NHEJ1   | 0.13284609 | 0.04199632 | conserved  | conserved            |
| NHLH1   | 0          | 0.02512911 | conserved  | conserved            |
| NHLRC2  | 0.61661388 | 0.19275187 | conserved  | conserved            |
| NHLRC3  | 0.12430517 | 0.07372824 | conserved  | conserved            |
| NHS     | 0.57507023 | 0.0544324  | conserved  | conserved            |
| NHSL1   | 8.88956425 | 0.19371146 | monkey-NSC | conserved            |
| NHSL2   | 0.21455271 | 0.02453841 | conserved  | conserved            |
| NID1    | 2.15385001 | 0.29598723 | conserved  | conserved            |
| NID2    | 0.13638268 | 0.05532042 | conserved  | conserved            |
| NIF3L1  | 0.07902225 | 0.21364389 | conserved  | conserved            |
| NIFK    | 0.10462465 | 0.45233982 | conserved  | conserved            |
| NIM1K   | 0.62545464 | 1.87573739 | conserved  | conserved            |
| NIN     | 1.88291667 | 0.08905519 | conserved  | conserved            |
| NINJ1   | 0.08280319 | 0.93729982 | mouse-RGL  | conserved            |
| NINL    | 0.53072253 | 0.07938182 | conserved  | conserved            |
| NIPA1   | 0.29411633 | 0.22535887 | conserved  | conserved            |
| NIPA2   | 0.23619379 | 0.45386357 | conserved  | conserved            |
| NIPAL1  | 0.00137337 | 0.00335512 | conserved  | conserved            |
| NIPAL2  | 0.19836212 | 0.01239203 | conserved  | conserved            |
| NIPAL3  | 0.17844713 | 0.07696399 | conserved  | conserved            |
| NIPAL4  | 0.00851376 | 0          | conserved  | conserved            |
| NIPBL   | 3.19124926 | 0.88715087 | conserved  | conserved            |
| NISCH   | 0.8467063  | 2.19727285 | conserved  | conserved            |
| NIT1    | 0.15815493 | 0.38748017 | conserved  | conserved            |
| NIT2    | 0.08296029 | 0.56259683 | conserved  | conserved            |
| NKAIN1  | 0.0124829  | 0.01193011 | conserved  | conserved            |
| NKAIN2  | 6.57172205 | 0.03793802 | monkey-NSC | monkey-NSC1-enriched |
| NKAIN3  | 47.4775706 | 0.03740475 | conserved  | conserved            |
| NKAIN4  | 0.007221   | 2.08528032 | conserved  | conserved            |
| NKAP    | 0.19557291 | 0.44028998 | conserved  | conserved            |
| NKD1    | 0.0370981  | 0.54323976 | conserved  | conserved            |
| NKD2    | 0.03997668 | 0.08385886 | conserved  | conserved            |
| NKG7    | 0          | 0          | conserved  | conserved            |
| NKIRAS1 | 0.36123018 | 0.3557944  | conserved  | conserved            |
| NKIRAS2 | 0.06912732 | 0.31280045 | conserved  | conserved            |
| NKPD1   | 0.03448265 | 0.01044315 | conserved  | conserved            |
| NKTR    | 4.33299005 | 1.20352531 | conserved  | conserved            |
| NKX3-1  | 0          | 0          | conserved  | conserved            |
| NLE1    | 0.05298357 | 0.13144564 | conserved  | conserved            |

|        |            |            |           |           |
|--------|------------|------------|-----------|-----------|
| NLGN1  | 18.8379989 | 0.52786351 | conserved | conserved |
| NLK    | 1.71621917 | 0.17816659 | conserved | conserved |
| NLN    | 1.01451995 | 0.11941337 | conserved | conserved |
| NLRC3  | 0.00700391 | 0.01752128 | conserved | conserved |
| NLRC4  | 0.01656782 | 0          | conserved | conserved |
| NLRC5  | 0.13913134 | 0.00393313 | conserved | conserved |
| NLRP12 | 0.01172441 | 0          | conserved | conserved |
| NLRP14 | 0.04379851 | 0          | conserved | conserved |
| NLRP3  | 0.01028928 | 0.00768289 | conserved | conserved |
| NLRP6  | 0.00188276 | 0          | conserved | conserved |
| NLRX1  | 0.2441589  | 0.10049952 | conserved | conserved |
| NMD3   | 0.26395917 | 0.25076855 | conserved | conserved |
| NME5   | 0.40251759 | 0.24863078 | conserved | conserved |
| NME6   | 0.16908975 | 0.34192275 | conserved | conserved |
| NME7   | 1.37548421 | 1.571428   | conserved | conserved |
| NME8   | 0.00441597 | 0.03839845 | conserved | conserved |
| NMI    | 0.03943284 | 0.17072568 | conserved | conserved |
| NMNAT1 | 0.18494156 | 0.08082957 | conserved | conserved |
| NMNAT2 | 0.76524984 | 0.0307391  | conserved | conserved |
| NMRAL1 | 0.19971522 | 0.24902779 | conserved | conserved |
| NMRK1  | 0.07014604 | 0.24555122 | conserved | conserved |
| NMRK2  | 0          | 0          | conserved | conserved |
| NMS    | 0.22899693 | 0          | conserved | conserved |
| NMT1   | 2.17237078 | 0.59536263 | conserved | conserved |
| NMT2   | 0.4775425  | 0.77203249 | conserved | conserved |
| NMU    | 0.00608148 | 0          | conserved | conserved |
| NMUR1  | 0.01404597 | 0          | conserved | conserved |
| NMUR2  | 0.01369836 | 0          | conserved | conserved |
| NNMT   | 0.07666776 | 0.00295618 | conserved | conserved |
| NOA1   | 0.10886069 | 0.19635773 | conserved | conserved |
| NOB1   | 0.08820151 | 0.28467137 | conserved | conserved |
| NOBOX  | 0          | 0          | conserved | conserved |
| NOC2L  | 0.17308297 | 0.16853088 | conserved | conserved |
| NOC3L  | 0.23149716 | 0.12746901 | conserved | conserved |
| NOD1   | 0.2976566  | 0.04134502 | conserved | conserved |
| NOD2   | 0.00355452 | 0          | conserved | conserved |
| NODAL  | 0.00772379 | 0          | conserved | conserved |
| NOL10  | 0.51161304 | 0.1130541  | conserved | conserved |
| NOL11  | 0.13133574 | 0.22260494 | conserved | conserved |
| NOL3   | 0.00744673 | 0.06939289 | conserved | conserved |
| NOL4   | 1.88067577 | 0.24869336 | conserved | conserved |

|         |            |            |           |           |
|---------|------------|------------|-----------|-----------|
| NOL4L   | 0.39849904 | 0.31194084 | conserved | conserved |
| NOL6    | 0.05966271 | 0.13642487 | conserved | conserved |
| NOL7    | 0.31436474 | 1.56505855 | mouse-RGL | conserved |
| NOL9    | 0.25815018 | 0.07748723 | conserved | conserved |
| NOLC1   | 0.11322684 | 0.43337102 | conserved | conserved |
| NONO    | 0.33838995 | 1.65510621 | conserved | conserved |
| NOP56   | 0.4034796  | 0.94327871 | conserved | conserved |
| NOP58   | 0.57260052 | 0.84826243 | conserved | conserved |
| NOP9    | 0.05409413 | 0.199993   | conserved | conserved |
| NOS1    | 0.2267758  | 0.01878914 | conserved | conserved |
| NOS2    | 0.01127267 | 0.00433653 | conserved | conserved |
| NOS3    | 0.01958481 | 0.04878999 | conserved | conserved |
| NOSIP   | 0.09190106 | 0.31195838 | conserved | conserved |
| NOSTRIN | 0.02044319 | 0.00835183 | conserved | conserved |
| NOTCH1  | 1.33694576 | 1.86434333 | conserved | conserved |
| NOTCH2  | 2.35087327 | 3.33305312 | conserved | conserved |
| NOTO    | 0.00300213 | 0          | conserved | conserved |
| NOVA1   | 3.29650397 | 0.32186862 | conserved | conserved |
| NOVA2   | 0.1668961  | 0.27337944 | conserved | conserved |
| NOX1    | 0.01874699 | 0          | conserved | conserved |
| NOX3    | 0.00595111 | 0          | conserved | conserved |
| NOX4    | 0.52170394 | 0.00408436 | conserved | conserved |
| NOXA1   | 0.26354515 | 0          | conserved | conserved |
| NOXO1   | 0.00735914 | 0.06946892 | conserved | conserved |
| NPAS1   | 0.05507235 | 0.00806797 | conserved | conserved |
| NPAS2   | 1.40132775 | 0          | conserved | conserved |
| NPAS3   | 53.1763704 | 2.31361594 | conserved | conserved |
| NPAS4   | 0.00123866 | 0.00824395 | conserved | conserved |
| NPAT    | 0.34206921 | 0.19472342 | conserved | conserved |
| NPB     | 0.00207823 | 0.00392353 | conserved | conserved |
| NPC1    | 0.67262257 | 0.34889609 | conserved | conserved |
| NPC1L1  | 0.03120658 | 0          | conserved | conserved |
| NPC2    | 0.15050558 | 2.74673672 | conserved | conserved |
| NPDC1   | 0.58896568 | 1.88868801 | mouse-RGL | conserved |
| NPEPL1  | 0.1927467  | 0.37308352 | conserved | conserved |
| NPEPPS  | 2.86864375 | 1.01674468 | conserved | conserved |
| NPFFR1  | 0.1450288  | 0          | conserved | conserved |
| NPFFR2  | 0.18231166 | 0          | conserved | conserved |
| NPHP1   | 1.03115427 | 0.26037293 | conserved | conserved |
| NPHS2   | 0.00163123 | 0          | conserved | conserved |
| NPL     | 0.62691508 | 0.04911172 | conserved | conserved |

|         |            |            |            |           |
|---------|------------|------------|------------|-----------|
| NPM3    | 0.03944077 | 0.94023221 | mouse-RGL  | conserved |
| NPNT    | 0.9572618  | 0.01410575 | monkey-NSC | conserved |
| NPPA    | 0.00441576 | 0          | conserved  | conserved |
| NPPB    | 0.00048464 | 0          | conserved  | conserved |
| NPPC    | 0.01711365 | 0.13883119 | conserved  | conserved |
| NPR1    | 0.0056433  | 0          | conserved  | conserved |
| NPR2    | 0.18080708 | 0.15494018 | conserved  | conserved |
| NPR3    | 0.00996945 | 0          | conserved  | conserved |
| NPRL2   | 0.10190864 | 0.26384712 | conserved  | conserved |
| NPSR1   | 0.04176423 | 0          | conserved  | conserved |
| NPTN    | 1.37337616 | 0.46576939 | conserved  | conserved |
| NPTX1   | 0.51749009 | 0.10636188 | conserved  | conserved |
| NPTX2   | 0.13199157 | 0.06040936 | conserved  | conserved |
| NPTXR   | 0.56835302 | 0.16606675 | conserved  | conserved |
| NPVF    | 0          | 0          | conserved  | conserved |
| NPY     | 0.04331074 | 0.10400002 | conserved  | conserved |
| NPY2R   | 0          | 0.01906938 | conserved  | conserved |
| NQO1    | 0.24557754 | 0.04789844 | conserved  | conserved |
| NQO2    | 0.21461878 | 0.11749036 | conserved  | conserved |
| NR0B1   | 0.001167   | 0          | conserved  | conserved |
| NR1D1   | 0.28626875 | 0.1296938  | conserved  | conserved |
| NR1D2   | 1.39653258 | 0.38874443 | conserved  | conserved |
| NR1H2   | 0.13808056 | 0.417925   | conserved  | conserved |
| NR1H3   | 0.01559214 | 0.06621507 | conserved  | conserved |
| NR1I2   | 0.03408338 | 0          | conserved  | conserved |
| NR1I3   | 0.00895041 | 0          | conserved  | conserved |
| NR2C1   | 0.59994313 | 0.09659523 | conserved  | conserved |
| NR2C2   | 0.89074085 | 0.49960193 | conserved  | conserved |
| NR2C2AP | 0.00969513 | 0.62693123 | conserved  | conserved |
| NR2E1   | 0.440368   | 0.98308048 | conserved  | conserved |
| NR2E3   | 0.00563419 | 0.00143007 | conserved  | conserved |
| NR2F1   | 1.04091168 | 4.44223755 | conserved  | conserved |
| NR2F2   | 0.23220611 | 0.63520528 | conserved  | conserved |
| NR3C1   | 1.70256202 | 0.99524514 | monkey-NSC | conserved |
| NR3C2   | 7.71563732 | 0.10158129 | monkey-NSC | conserved |
| NR4A1   | 0.14503051 | 0.62061318 | conserved  | conserved |
| NR4A2   | 0.04444469 | 0.10741103 | conserved  | conserved |
| NR4A3   | 0.08818371 | 0.07361328 | conserved  | conserved |
| NR5A1   | 0          | 0          | conserved  | conserved |
| NR5A2   | 0.00194833 | 0          | conserved  | conserved |
| NR6A1   | 0.31483919 | 0.01421888 | conserved  | conserved |



|         |            |            |            |           |
|---------|------------|------------|------------|-----------|
| NRAP    | 0          | 0          | conserved  | conserved |
| NRAS    | 0.12152944 | 1.3365699  | mouse-RGL  | conserved |
| NRBF2   | 0.09406641 | 0.25454566 | conserved  | conserved |
| NRBP1   | 0.29845713 | 0.48790178 | conserved  | conserved |
| NRBP2   | 0.5763785  | 0.53454415 | conserved  | conserved |
| NRCAM   | 13.4304078 | 0.35424657 | monkey-NSC | conserved |
| NREP    | 0.56975983 | 1.17893495 | mouse-RGL  | conserved |
| NRF1    | 1.88505214 | 0.31256525 | monkey-NSC | conserved |
| NRG1    | 4.27292989 | 0.21844163 | conserved  | conserved |
| NRG2    | 1.82008996 | 0.04004535 | monkey-NSC | conserved |
| NRG4    | 0.10617098 | 0          | conserved  | conserved |
| NRGN    | 0.37746777 | 0.32321987 | conserved  | conserved |
| NRIP1   | 0.77769204 | 0.28757436 | conserved  | conserved |
| NRIP3   | 0.12084668 | 0.12910879 | conserved  | conserved |
| NRK     | 0.00577303 | 0          | conserved  | conserved |
| NRL     | 0.01142847 | 0          | conserved  | conserved |
| NRM     | 0.00548401 | 0.09526263 | conserved  | conserved |
| NRN1    | 0.33154019 | 0.52610328 | conserved  | conserved |
| NRP1    | 1.61769834 | 0.4556822  | conserved  | conserved |
| NRP2    | 4.65336048 | 0.45716837 | conserved  | conserved |
| NRROS   | 0.10322373 | 0          | conserved  | conserved |
| NRSN1   | 0.20429494 | 0.06280191 | conserved  | conserved |
| NRSN2   | 0.02464939 | 0.00656015 | conserved  | conserved |
| NRXN1   | 106.206559 | 2.42893167 | monkey-NSC | conserved |
| NRXN2   | 0.83822035 | 2.15191984 | conserved  | conserved |
| NRXN3   | 12.2018834 | 0.11583154 | monkey-NSC | conserved |
| NSD1    | 4.28338969 | 0.61517384 | conserved  | conserved |
| NSDHL   | 0.20360002 | 0.64087476 | conserved  | conserved |
| NSF     | 2.24225637 | 0.42504232 | conserved  | conserved |
| NSFL1C  | 0.43931127 | 0.68999022 | conserved  | conserved |
| NSG1    | 0.11579701 | 1.1274151  | conserved  | conserved |
| NSG2    | 0.52304078 | 1.04676925 | conserved  | conserved |
| NSL1    | 0.25937766 | 0.02661534 | conserved  | conserved |
| NSMCE2  | 4.32236747 | 0.56172792 | conserved  | conserved |
| NSMCE4A | 0.16021742 | 0.97113853 | conserved  | conserved |
| NSRP1   | 0.98611399 | 0.46336378 | conserved  | conserved |
| NSUN2   | 0.24408483 | 0.36302367 | conserved  | conserved |
| NSUN3   | 0.39071452 | 0.15169371 | conserved  | conserved |
| NSUN5   | 0.08519631 | 0.06126547 | conserved  | conserved |
| NSUN6   | 0.47051852 | 0.08456594 | conserved  | conserved |
| NT5C    | 0.07489286 | 0.88013286 | conserved  | conserved |

|        |            |            |            |           |
|--------|------------|------------|------------|-----------|
| NT5C1A | 0.00279539 | 0          | conserved  | conserved |
| NT5C2  | 2.49622383 | 0.21467077 | monkey-NSC | conserved |
| NT5C3B | 0.22927981 | 0.58847433 | conserved  | conserved |
| NT5DC1 | 0.39974711 | 0.04254992 | conserved  | conserved |
| NT5DC2 | 0.02166624 | 0.924238   | mouse-RGL  | conserved |
| NT5E   | 0.578344   | 0.00556165 | conserved  | conserved |
| NT5M   | 0.64682514 | 0.54232093 | conserved  | conserved |
| NTF3   | 0.04421312 | 0.00477273 | conserved  | conserved |
| NTHL1  | 0.12689854 | 0.18886049 | conserved  | conserved |
| NTM    | 60.6581391 | 1.3035912  | monkey-NSC | conserved |
| NTMT1  | 0.07372721 | 0.56065601 | conserved  | conserved |
| NTN4   | 0.13874759 | 0.05788297 | conserved  | conserved |
| NTNG1  | 0.77403089 | 0.35391263 | conserved  | conserved |
| NTNG2  | 0.2304397  | 0.01384091 | conserved  | conserved |
| NTPCR  | 0.20822391 | 0.23812748 | conserved  | conserved |
| NTRK1  | 0.00815805 | 0          | conserved  | conserved |
| NTRK2  | 17.8204722 | 4.05827538 | monkey-NSC | conserved |
| NTRK3  | 7.55801848 | 0.27228742 | conserved  | conserved |
| NTS    | 0.02701773 | 0.0141817  | conserved  | conserved |
| NTSR2  | 0.83435408 | 1.92711603 | monkey-NSC | conserved |
| NUAK1  | 0.62133253 | 0.20306892 | conserved  | conserved |
| NUAK2  | 0.00991044 | 0.02472314 | conserved  | conserved |
| NUB1   | 0.29986454 | 0.26537246 | conserved  | conserved |
| NUBP1  | 0.14726776 | 0.21617597 | conserved  | conserved |
| NUBP2  | 0.15788153 | 0.38427242 | conserved  | conserved |
| NUBPL  | 1.42040019 | 0.23806607 | conserved  | conserved |
| NUCB1  | 0.24671342 | 0.319479   | conserved  | conserved |
| NUCB2  | 0.80123174 | 0.05969469 | conserved  | conserved |
| NUCKS1 | 1.47355707 | 1.20039009 | conserved  | conserved |
| NUDCD1 | 0.15639916 | 0.14763305 | conserved  | conserved |
| NUDT1  | 0.0553023  | 0.22442895 | conserved  | conserved |
| NUDT12 | 0.27756692 | 0.04711855 | conserved  | conserved |
| NUDT13 | 0.09889541 | 0.12203879 | conserved  | conserved |
| NUDT18 | 0.01398832 | 0.28855657 | conserved  | conserved |
| NUDT21 | 0.30724103 | 1.67300966 | mouse-RGL  | conserved |
| NUDT22 | 0.0600508  | 0.15265885 | conserved  | conserved |
| NUDT3  | 4.89870459 | 0.90817515 | monkey-NSC | conserved |
| NUDT4  | 0.64339435 | 0.85514199 | conserved  | conserved |
| NUDT5  | 0.23539528 | 0.52654731 | conserved  | conserved |
| NUDT7  | 0.09908381 | 0.08135095 | conserved  | conserved |
| NUDT9  | 0.36242877 | 0.53919511 | conserved  | conserved |

|         |            |            |            |           |
|---------|------------|------------|------------|-----------|
| NUF2    | 0.00472668 | 0.07856051 | conserved  | conserved |
| NUFIP1  | 0.23721368 | 0.11648771 | conserved  | conserved |
| NUFIP2  | 0.64865084 | 0.19640732 | conserved  | conserved |
| NUGGC   | 0.16770165 | 0          | conserved  | conserved |
| NUMA1   | 0.85663877 | 0.33929916 | conserved  | conserved |
| NUMB    | 2.16506523 | 0.0830494  | conserved  | conserved |
| NUMBL   | 0.37756408 | 0.15302883 | conserved  | conserved |
| NUP107  | 0.51627048 | 0.07434011 | conserved  | conserved |
| NUP133  | 0.67173842 | 0.0696708  | conserved  | conserved |
| NUP153  | 0.77483927 | 0.27479695 | conserved  | conserved |
| NUP155  | 0.4018506  | 0.10858658 | conserved  | conserved |
| NUP160  | 0.61690222 | 0.04312394 | conserved  | conserved |
| NUP205  | 0.62649649 | 0.07416932 | conserved  | conserved |
| NUP210  | 0.33347597 | 0.08721515 | conserved  | conserved |
| NUP210L | 0.18605826 | 0.00929018 | conserved  | conserved |
| NUP214  | 1.32348376 | 0.16826034 | conserved  | conserved |
| NUP35   | 0.13542628 | 0.15966793 | conserved  | conserved |
| NUP37   | 0.28384361 | 0.14725494 | conserved  | conserved |
| NUP54   | 0.3604985  | 0.21526098 | conserved  | conserved |
| NUP62   | 0.03411827 | 0.18303454 | conserved  | conserved |
| NUP85   | 0.36670987 | 0.13220403 | conserved  | conserved |
| NUP93   | 0.47305983 | 0.09158269 | conserved  | conserved |
| NUP98   | 1.00395146 | 0.01551386 | conserved  | conserved |
| NUTM1   | 0.01824033 | 0          | conserved  | conserved |
| NVL     | 1.13141297 | 0.29475275 | conserved  | conserved |
| NWD1    | 1.60393713 | 0.14928583 | monkey-NSC | conserved |
| NWD2    | 0.65258829 | 0.02539014 | conserved  | conserved |
| NXF1    | 0.22451162 | 1.88170436 | conserved  | conserved |
| NXF3    | 0.00564093 | 0          | conserved  | conserved |
| NXN     | 0.57880245 | 0.30525306 | conserved  | conserved |
| NXNL2   | 0.03082417 | 0.01737627 | conserved  | conserved |
| NXPE2   | 0.01360422 | 0.00205065 | conserved  | conserved |
| NXPH1   | 0.68520551 | 0.03787193 | conserved  | conserved |
| NXPH2   | 0.06545419 | 0          | conserved  | conserved |
| NXPH3   | 0.00884492 | 0.05938024 | conserved  | conserved |
| NXT1    | 0.00837571 | 0.48852052 | conserved  | conserved |
| NXT2    | 0.0452864  | 0.77381554 | conserved  | conserved |
| NYAP1   | 0.14133378 | 0.12715046 | conserved  | conserved |
| NYNRIN  | 0.03639542 | 0.0645875  | conserved  | conserved |
| OAF     | 1.43303786 | 0.52845414 | monkey-NSC | conserved |
| OARD1   | 0.04703054 | 0.61250858 | conserved  | conserved |

|         |            |            |            |           |
|---------|------------|------------|------------|-----------|
| OAS2    | 0.01465138 | 0          | conserved  | conserved |
| OAS3    | 0.08112501 | 0          | conserved  | conserved |
| OAZ1    | 0.01925001 | 13.3415338 | mouse-RGL  | conserved |
| OAZ2    | 0.33553215 | 1.97235463 | conserved  | conserved |
| OAZ3    | 0.01042649 | 0.01252519 | conserved  | conserved |
| OCA2    | 0.14240928 | 0          | conserved  | conserved |
| OCEL1   | 0.05857479 | 0.1570237  | conserved  | conserved |
| OCIAD1  | 1.10137301 | 1.35857954 | conserved  | conserved |
| OCIAD2  | 0.03966357 | 0.10636967 | conserved  | conserved |
| OCLN    | 0.1795456  | 0.04706115 | conserved  | conserved |
| OCRL    | 0.31183164 | 0.39342804 | conserved  | conserved |
| ODF1    | 0.0015379  | 0          | conserved  | conserved |
| ODF2    | 1.29086704 | 0.39055892 | monkey-NSC | conserved |
| ODF2L   | 0.49474013 | 0.17018789 | conserved  | conserved |
| OGDH    | 1.70048564 | 0.4422888  | conserved  | conserved |
| OGDHL   | 0.24379315 | 0.00321096 | conserved  | conserved |
| OGFOD1  | 0.52673417 | 0.09162933 | conserved  | conserved |
| OGFOD2  | 0.08073909 | 0.16909868 | conserved  | conserved |
| OGFR    | 0.1349694  | 0.5456793  | conserved  | conserved |
| OGFRL1  | 0.59006422 | 0.28902973 | conserved  | conserved |
| OGG1    | 0.29847346 | 0.11960768 | conserved  | conserved |
| OGN     | 0.01742113 | 0.0414743  | conserved  | conserved |
| OGT     | 0.92479478 | 2.52431665 | conserved  | conserved |
| OIP5    | 0.02992042 | 0.00634453 | conserved  | conserved |
| OIT3    | 0.00114633 | 0          | conserved  | conserved |
| OLA1    | 1.27821069 | 0.64521091 | conserved  | conserved |
| OLFM1   | 0.85462428 | 0.57872531 | conserved  | conserved |
| OLFM2   | 6.11583883 | 0.01475783 | monkey-NSC | conserved |
| OLFM3   | 0.7011199  | 0.01399348 | conserved  | conserved |
| OLFM4   | 0.02542261 | 0          | conserved  | conserved |
| OLFML1  | 0.05730456 | 0.03426419 | conserved  | conserved |
| OLFML2A | 0.02299471 | 0.03052355 | conserved  | conserved |
| OLFML2B | 0.049419   | 0.02739384 | conserved  | conserved |
| OLIG2   | 0.01562899 | 0.4074892  | conserved  | conserved |
| OLIG3   | 0          | 0          | conserved  | conserved |
| OLR1    | 0.02782945 | 0          | conserved  | conserved |
| OMA1    | 0.27148007 | 0.06423337 | conserved  | conserved |
| OMG     | 0.09096489 | 0.26636332 | conserved  | conserved |
| ONECUT1 | 0.0068297  | 0          | conserved  | conserved |
| ONECUT2 | 0.02972266 | 0.04667941 | conserved  | conserved |
| OPA1    | 1.65813283 | 0.23963119 | conserved  | conserved |

|         |            |            |            |           |
|---------|------------|------------|------------|-----------|
| OPA3    | 0.30214274 | 0.53185525 | conserved  | conserved |
| OPALIN  | 0.18933617 | 0.00777114 | conserved  | conserved |
| OPCML   | 12.4616713 | 0.24411293 | monkey-NSC | conserved |
| OPHN1   | 16.9791489 | 0.22711426 | conserved  | conserved |
| OPN3    | 0.10365174 | 0.01824103 | conserved  | conserved |
| OPN4    | 0          | 0.00338249 | conserved  | conserved |
| OPN5    | 0.00220032 | 0          | conserved  | conserved |
| OPRK1   | 0.00274458 | 0.0070276  | conserved  | conserved |
| OPRL1   | 0.03212881 | 0.00377343 | conserved  | conserved |
| OPRM1   | 0.11875614 | 0          | conserved  | conserved |
| OPTC    | 0          | 0.0129346  | conserved  | conserved |
| OPTN    | 0.22381042 | 0.12016013 | conserved  | conserved |
| ORAI1   | 0.03218622 | 0.39433306 | conserved  | conserved |
| ORAI2   | 0.06429511 | 0.10683348 | conserved  | conserved |
| ORAI3   | 0.08518141 | 0.29263846 | conserved  | conserved |
| ORC3    | 0.52763629 | 0.15366128 | conserved  | conserved |
| ORC4    | 1.35725703 | 0.35063779 | conserved  | conserved |
| ORC5    | 0.53415015 | 0.05794472 | conserved  | conserved |
| ORC6    | 0.04867262 | 0.42626778 | conserved  | conserved |
| ORMDL1  | 0.19854247 | 0.27646328 | conserved  | conserved |
| ORMDL3  | 0.02669846 | 0.59300965 | conserved  | conserved |
| OS9     | 0.42829856 | 0.3200023  | conserved  | conserved |
| OSBP    | 0.55334104 | 0.11219183 | conserved  | conserved |
| OSBP2   | 2.6429899  | 0.05599295 | conserved  | conserved |
| OSBPL10 | 0.28186324 | 0          | conserved  | conserved |
| OSBPL11 | 0.77374793 | 0.11915932 | conserved  | conserved |
| OSBPL1A | 3.52710595 | 0.35960456 | conserved  | conserved |
| OSBPL2  | 0.39440162 | 0.24482831 | conserved  | conserved |
| OSBPL3  | 0.16706612 | 0.02755807 | conserved  | conserved |
| OSBPL5  | 0.37757544 | 0.0496526  | conserved  | conserved |
| OSBPL6  | 2.33450499 | 0.0704035  | conserved  | conserved |
| OSBPL7  | 0.31696382 | 0.09216822 | conserved  | conserved |
| OSBPL8  | 1.58653914 | 0.14107908 | conserved  | conserved |
| OSBPL9  | 1.6648249  | 0.25424425 | conserved  | conserved |
| OSCP1   | 0.14447284 | 0.32943179 | conserved  | conserved |
| OSER1   | 0.06852391 | 0.66498404 | mouse-RGL  | conserved |
| OSGEP   | 0.18745569 | 0.78693187 | conserved  | conserved |
| OSGEPL1 | 0.09089025 | 0.28402492 | conserved  | conserved |
| OSGIN1  | 0.21857465 | 0          | conserved  | conserved |
| OSGIN2  | 0.58966258 | 0.26013689 | conserved  | conserved |
| OSM     | 0          | 0          | conserved  | conserved |

|        |            |            |            |           |
|--------|------------|------------|------------|-----------|
| OSMR   | 0.47166591 | 0.01737256 | conserved  | conserved |
| OSR1   | 0.00249927 | 0.01251368 | conserved  | conserved |
| OSTF1  | 0.14302883 | 0.15758416 | conserved  | conserved |
| OSTM1  | 0.33463209 | 0.18802295 | conserved  | conserved |
| OSTN   | 0.00610656 | 0          | conserved  | conserved |
| OTC    | 0.01463478 | 0          | conserved  | conserved |
| OTOA   | 0.02492993 | 0.00230763 | conserved  | conserved |
| OTOF   | 0.0140119  | 0          | conserved  | conserved |
| OTOG   | 0          | 0          | conserved  | conserved |
| OTOGL  | 0.01423354 | 0          | conserved  | conserved |
| OTOL1  | 0          | 0          | conserved  | conserved |
| OTOP1  | 0.00090623 | 0          | conserved  | conserved |
| OTOP3  | 0          | 0          | conserved  | conserved |
| OTOR   | 0.0022249  | 0          | conserved  | conserved |
| OTOS   | 0.00574882 | 0          | conserved  | conserved |
| OTP    | 0.00119944 | 0          | conserved  | conserved |
| OTUB2  | 0.03474889 | 0.06119443 | conserved  | conserved |
| OTUD4  | 0.63092273 | 0.27918278 | conserved  | conserved |
| OTUD5  | 0.31741827 | 0.21486345 | conserved  | conserved |
| OTUD7A | 1.38033964 | 0          | monkey-NSC | conserved |
| OTUD7B | 0.93597785 | 0.23257098 | conserved  | conserved |
| OTX1   | 0.12510292 | 0.42246371 | conserved  | conserved |
| OTX2   | 0          | 0.06648787 | conserved  | conserved |
| OVCH2  | 0.01785119 | 0          | conserved  | conserved |
| OVGP1  | 0.03283017 | 0.01675994 | conserved  | conserved |
| OVOL1  | 0.0164165  | 0          | conserved  | conserved |
| OVOL3  | 0.02297387 | 0          | conserved  | conserved |
| OXA1L  | 0.20518582 | 0.69638506 | conserved  | conserved |
| OXGR1  | 0.00292358 | 0          | conserved  | conserved |
| OXLD1  | 0.00482017 | 0.14545907 | conserved  | conserved |
| OXNAD1 | 0.28910037 | 0.32166547 | conserved  | conserved |
| OXR1   | 5.02408297 | 0.59496697 | conserved  | conserved |
| OXSM   | 0.07506402 | 0.06664366 | conserved  | conserved |
| OXSR1  | 0.75439873 | 0.1183379  | conserved  | conserved |
| OXT    | 0.00138069 | 0.00345988 | conserved  | conserved |
| OXTR   | 0          | 0          | conserved  | conserved |
| P2RX1  | 0.00239343 | 0          | conserved  | conserved |
| P2RX2  | 0.00600381 | 0.00311524 | conserved  | conserved |
| P2RX4  | 0.51001614 | 0.26305785 | conserved  | conserved |
| P2RX6  | 0.00618012 | 0.07894411 | conserved  | conserved |
| P2RX7  | 0.59683351 | 0.09366125 | conserved  | conserved |

|         |            |            |            |           |
|---------|------------|------------|------------|-----------|
| P2RY1   | 0.1260725  | 0.03620666 | conserved  | conserved |
| P2RY10  | 0.00177517 | 0          | conserved  | conserved |
| P2RY12  | 0.11191487 | 0.0136473  | conserved  | conserved |
| P2RY13  | 0.02567763 | 0          | conserved  | conserved |
| P2RY14  | 0.18427137 | 0.0208466  | conserved  | conserved |
| P2RY6   | 0          | 0.00274003 | conserved  | conserved |
| P3H1    | 0.22118126 | 0.10863857 | conserved  | conserved |
| P3H2    | 0.60234329 | 0.01515108 | conserved  | conserved |
| P3H4    | 0.25180911 | 0.50035876 | conserved  | conserved |
| P4HA1   | 0.98814769 | 0.2753919  | conserved  | conserved |
| P4HTM   | 0.75419495 | 0.19964441 | conserved  | conserved |
| PISD    | 0.45251651 | 1.00441775 | conserved  | conserved |
| PABPC4  | 0.35495915 | 0.19032337 | conserved  | conserved |
| PACRG   | 5.2118863  | 0.23133344 | monkey-NSC | conserved |
| PACRGL  | 0.23598185 | 0.32839179 | conserved  | conserved |
| PACS1   | 2.19371224 | 0.10960333 | conserved  | conserved |
| PACS2   | 0.77990628 | 0.29132241 | conserved  | conserved |
| PACSIN1 | 0.1827074  | 0.08523573 | conserved  | conserved |
| PACSIN3 | 0.10600958 | 0.76884382 | conserved  | conserved |
| PADI2   | 2.09482191 | 1.03207303 | monkey-NSC | conserved |
| PADI4   | 0.04117187 | 0.00248665 | conserved  | conserved |
| PADI6   | 0.00280286 | 0          | conserved  | conserved |
| PAF1    | 0.06425204 | 0.25588384 | conserved  | conserved |
| PAFAH2  | 0.26154369 | 0.07417956 | conserved  | conserved |
| PAG1    | 0.3236163  | 0.35166914 | conserved  | conserved |
| PAH     | 0.02744265 | 0          | conserved  | conserved |
| PAIP1   | 0.32847774 | 0.34519703 | conserved  | conserved |
| PAIP2   | 0.4888646  | 3.08296922 | mouse-RGL  | conserved |
| PAIP2B  | 0.13585368 | 0.29703506 | conserved  | conserved |
| PAK1IP1 | 0.15126839 | 0.58998435 | conserved  | conserved |
| PAK2    | 1.07494185 | 0.78541349 | conserved  | conserved |
| PAK3    | 0.56407642 | 0.27093834 | conserved  | conserved |
| PALD1   | 0.12477937 | 0.05201224 | conserved  | conserved |
| PALLD   | 2.19568553 | 0.31863299 | conserved  | conserved |
| PALM    | 5.19802636 | 0.46637043 | monkey-NSC | conserved |
| PALMD   | 0.48277859 | 0.04755404 | conserved  | conserved |
| PAM     | 1.5545433  | 0.6425985  | conserved  | conserved |
| PAMR1   | 4.33666336 | 0.09008595 | monkey-NSC | conserved |
| PAN2    | 0.50666863 | 0.11451371 | conserved  | conserved |
| PAN3    | 1.25838752 | 0.37816112 | conserved  | conserved |
| PANK1   | 0.50263886 | 0.34724734 | conserved  | conserved |

|        |            |            |            |           |
|--------|------------|------------|------------|-----------|
| PANK2  | 0.80960043 | 0.50285891 | conserved  | conserved |
| PANK3  | 0.19751525 | 0.45084812 | conserved  | conserved |
| PANK4  | 0.25316164 | 0.01334965 | conserved  | conserved |
| PANX1  | 0.06198444 | 0.21688398 | conserved  | conserved |
| PAPLN  | 1.00313236 | 0          | monkey-NSC | conserved |
| PAPOLA | 1.18594324 | 1.41419161 | mouse-RGL  | conserved |
| PAPOLG | 0.33366029 | 0.07155395 | conserved  | conserved |
| PAPPA  | 0.07182111 | 0.04678392 | conserved  | conserved |
| PAPPA2 | 0.11507694 | 0.01274887 | conserved  | conserved |
| PAPSS1 | 0.69156834 | 0.82081278 | conserved  | conserved |
| PAPSS2 | 0.21423433 | 0.0616973  | conserved  | conserved |
| PAQR3  | 0.20227602 | 0.02147763 | conserved  | conserved |
| PAQR4  | 0.15250627 | 0.62557732 | conserved  | conserved |
| PAQR5  | 0.01058465 | 0.00462855 | conserved  | conserved |
| PAQR7  | 0.04725192 | 0.43100286 | conserved  | conserved |
| PAQR8  | 0.37228225 | 0.92262809 | conserved  | conserved |
| PAQR9  | 0.02711303 | 0.04354748 | conserved  | conserved |
| PARD3  | 16.7205509 | 0.41734162 | conserved  | conserved |
| PARD3B | 8.92829608 | 0.39373444 | conserved  | conserved |
| PARD6A | 0.05124159 | 0.55323324 | conserved  | conserved |
| PARD6B | 0.07386859 | 0.05394747 | conserved  | conserved |
| PARD6G | 0.05585087 | 0.38720448 | conserved  | conserved |
| PARG   | 0.98376032 | 0.18064638 | conserved  | conserved |
| PARL   | 0.49855806 | 0.55016094 | conserved  | conserved |
| PARN   | 1.29351759 | 0.14625967 | conserved  | conserved |
| PARP1  | 0.30601206 | 0.44845534 | conserved  | conserved |
| PARP11 | 0.39459883 | 0.26900092 | conserved  | conserved |
| PARP12 | 0.11008004 | 0.10250861 | conserved  | conserved |
| PARP14 | 0.05723685 | 0.01075487 | conserved  | conserved |
| PARP16 | 0.37732715 | 0.05832444 | conserved  | conserved |
| PARP2  | 0.14291604 | 0.21585067 | conserved  | conserved |
| PARP3  | 0.02480634 | 0.04466967 | conserved  | conserved |
| PARP6  | 0.81381484 | 0.23140113 | conserved  | conserved |
| PARP8  | 2.04815301 | 0.0942749  | conserved  | conserved |
| PARP9  | 0.44357797 | 0.04390577 | conserved  | conserved |
| PARPBP | 0.01072175 | 0.00956106 | conserved  | conserved |
| PARVA  | 0.95488279 | 0.31194258 | conserved  | conserved |
| PARVB  | 0.90714612 | 0.21809941 | conserved  | conserved |
| PARVG  | 0.00132759 | 0.01227178 | conserved  | conserved |
| PASK   | 0.15958619 | 0.03477764 | conserved  | conserved |
| PATE2  | 0.04264771 | 0.02414381 | conserved  | conserved |



|         |            |            |            |           |
|---------|------------|------------|------------|-----------|
| PATE4   | 0          | 0          | conserved  | conserved |
| PATL1   | 0.32448651 | 0.16371135 | conserved  | conserved |
| PATL2   | 0.02156848 | 0          | conserved  | conserved |
| PATZ1   | 0.32226666 | 0.38796671 | conserved  | conserved |
| PAWR    | 0.46174197 | 0.09558303 | conserved  | conserved |
| PAX2    | 0.00308545 | 0          | conserved  | conserved |
| PAX3    | 0.01357474 | 0.00696699 | conserved  | conserved |
| PAX5    | 0.0468902  | 0          | conserved  | conserved |
| PAX6    | 1.27505889 | 2.56158704 | conserved  | conserved |
| PAX7    | 0.00155639 | 0          | conserved  | conserved |
| PAX8    | 0.00467141 | 0          | conserved  | conserved |
| PAX9    | 0          | 0          | conserved  | conserved |
| PAXIP1  | 0.32792813 | 0.15357293 | conserved  | conserved |
| PBDC1   | 0.04687545 | 0.64418218 | conserved  | conserved |
| PBK     | 0.00651175 | 0.09222409 | conserved  | conserved |
| PBRM1   | 2.74945172 | 1.59432824 | conserved  | conserved |
| PBX1    | 12.9368674 | 5.3989462  | conserved  | conserved |
| PBX2    | 0.17318642 | 0.1362403  | conserved  | conserved |
| PBX4    | 0.39098406 | 0.266004   | conserved  | conserved |
| PCBD1   | 0.1145882  | 0.16991997 | conserved  | conserved |
| PCBP1   | 0.00426415 | 1.8847688  | conserved  | conserved |
| PCBP3   | 0.50281998 | 0.14951049 | conserved  | conserved |
| PCBP4   | 0.49170298 | 1.28667798 | conserved  | conserved |
| PCCA    | 4.38184046 | 0.55427999 | conserved  | conserved |
| PCCB    | 0.47686389 | 0.3393833  | conserved  | conserved |
| PCDH1   | 0.09984373 | 0.10489234 | conserved  | conserved |
| PCDH10  | 0.90400575 | 0.92033179 | conserved  | conserved |
| PCDH12  | 0.00565843 | 0          | conserved  | conserved |
| PCDH15  | 2.29093265 | 0.07058433 | conserved  | conserved |
| PCDH17  | 1.83021258 | 0.47727953 | monkey-NSC | conserved |
| PCDH18  | 0.03678242 | 0.04810869 | conserved  | conserved |
| PCDH19  | 0.24123155 | 0.07722184 | conserved  | conserved |
| PCDH7   | 2.12003936 | 0.08216504 | monkey-NSC | conserved |
| PCDH9   | 69.7469858 | 0.46880131 | conserved  | conserved |
| PCDHAC2 | 1.80326824 | 0.00911711 | conserved  | conserved |
| PCDHB1  | 0          | 0          | conserved  | conserved |
| PCED1A  | 0.28053005 | 0.07743241 | conserved  | conserved |
| PCF11   | 0.71663388 | 0.43684425 | conserved  | conserved |
| PCGF1   | 0.0253746  | 0.11632686 | conserved  | conserved |
| PCGF2   | 0.11322475 | 0.19891678 | conserved  | conserved |
| PCGF5   | 1.27701086 | 0.31139666 | conserved  | conserved |

|          |            |            |            |           |
|----------|------------|------------|------------|-----------|
| PCGF6    | 0.40041296 | 0.1832352  | conserved  | conserved |
| PCID2    | 0.97231297 | 0.11085301 | conserved  | conserved |
| PCIF1    | 0.07777341 | 1.00649446 | conserved  | conserved |
| PCK1     | 0.00172778 | 0          | conserved  | conserved |
| PCK2     | 0.01856685 | 0.04153903 | conserved  | conserved |
| PCLO     | 3.28741921 | 0.08268434 | conserved  | conserved |
| PCM1     | 2.72045204 | 1.2404744  | conserved  | conserved |
| PCMTD1   | 1.02987789 | 0.6569694  | conserved  | conserved |
| PCMTD2   | 0.24410531 | 0.42878941 | conserved  | conserved |
| PCNA     | 0.02479299 | 0.57204228 | conserved  | conserved |
| PCOLCE   | 0.00065512 | 0.0278135  | conserved  | conserved |
| PCOLCE2  | 0.08065106 | 0.03748834 | conserved  | conserved |
| PCP2     | 0          | 0          | conserved  | conserved |
| PCSK1    | 0.04787194 | 0          | conserved  | conserved |
| PCSK2    | 1.29261217 | 0.02419444 | monkey-NSC | conserved |
| PCSK5    | 6.70417763 | 0.03876389 | conserved  | conserved |
| PCSK6    | 0.64549602 | 0.43848777 | conserved  | conserved |
| PCSK7    | 0.44241989 | 0.05741276 | conserved  | conserved |
| PCSK9    | 0.00157055 | 0          | conserved  | conserved |
| PCTP     | 1.76442024 | 0.02483433 | monkey-NSC | conserved |
| PCYOX1   | 0.26673151 | 0.46991676 | conserved  | conserved |
| PCYOX1L  | 0.0257941  | 0.14766423 | conserved  | conserved |
| PCYT1A   | 0.61626676 | 0.25511244 | conserved  | conserved |
| PCYT1B   | 0.7637842  | 0.12326853 | conserved  | conserved |
| PCYT2    | 0.18451978 | 0.87580492 | conserved  | conserved |
| PDC      | 0.00378996 | 0          | conserved  | conserved |
| PDCD11   | 0.20164545 | 0.26033071 | conserved  | conserved |
| PDCD1LG2 | 0.0499825  | 0          | conserved  | conserved |
| PDCD7    | 0.15517559 | 0.16942174 | conserved  | conserved |
| PDCL     | 0.05206822 | 0.35766483 | conserved  | conserved |
| PDCL2    | 0.0009884  | 0          | conserved  | conserved |
| PDE10A   | 0.49804419 | 0.56745084 | conserved  | conserved |
| PDE12    | 0.0588945  | 0.18460899 | conserved  | conserved |
| PDE1A    | 3.50154402 | 0.07774828 | conserved  | conserved |
| PDE1B    | 0.11372341 | 0.25541388 | conserved  | conserved |
| PDE1C    | 0.19143897 | 0.12398742 | conserved  | conserved |
| PDE3A    | 1.62636662 | 0.20181991 | conserved  | conserved |
| PDE3B    | 0.74142925 | 0.03724551 | conserved  | conserved |
| PDE4A    | 0.38496427 | 0.16103336 | conserved  | conserved |
| PDE4B    | 6.76423198 | 0.32213813 | monkey-NSC | conserved |
| PDE4D    | 5.51450199 | 0.05462412 | conserved  | conserved |

|        |            |            |            |           |
|--------|------------|------------|------------|-----------|
| PDE5A  | 0.8032048  | 0.05586448 | conserved  | conserved |
| PDE6A  | 0.01460555 | 0.01318831 | conserved  | conserved |
| PDE6B  | 0.08487507 | 0          | conserved  | conserved |
| PDE6C  | 0.02012447 | 0          | conserved  | conserved |
| PDE6D  | 0.51950241 | 1.02648337 | conserved  | conserved |
| PDE7A  | 0.69613231 | 0.24683329 | conserved  | conserved |
| PDE8A  | 1.77738913 | 0          | monkey-NSC | conserved |
| PDE9A  | 1.57546535 | 0.12819302 | conserved  | conserved |
| PDGFB  | 0.01737323 | 0.00691917 | conserved  | conserved |
| PDGFC  | 2.51781221 | 0.04889912 | monkey-NSC | conserved |
| PDGFD  | 0.0402502  | 0.12264554 | conserved  | conserved |
| PDGFRA | 1.1951929  | 0.0168389  | monkey-NSC | conserved |
| PDGFRB | 1.24399502 | 0.50414392 | conserved  | conserved |
| PDGFRL | 0.10793891 | 0.27367586 | conserved  | conserved |
| PDHB   | 0.1483302  | 0.46537157 | conserved  | conserved |
| PDHX   | 0.7053961  | 0.23122715 | conserved  | conserved |
| PDIA2  | 0.02721417 | 0          | conserved  | conserved |
| PDIA4  | 0.16237758 | 0.68102828 | conserved  | conserved |
| PDIA5  | 0.08275864 | 0.0209131  | conserved  | conserved |
| PDIA6  | 0.43719019 | 0.90227651 | conserved  | conserved |
| PDIK1L | 0.06540277 | 0.17175124 | conserved  | conserved |
| PDILT  | 0.00370321 | 0          | conserved  | conserved |
| PDK1   | 0.2100081  | 0.14110476 | conserved  | conserved |
| PDK2   | 0.13752236 | 0.29600921 | conserved  | conserved |
| PDK3   | 0.38652977 | 0.34703766 | conserved  | conserved |
| PDK4   | 0.5379274  | 0.07628944 | conserved  | conserved |
| PDLIM3 | 0.87154745 | 0.64539607 | conserved  | conserved |
| PDLIM5 | 3.76311603 | 0.74103143 | conserved  | conserved |
| PDLIM7 | 0.02554206 | 0.88349207 | conserved  | conserved |
| PDP1   | 0.14292661 | 0.32507387 | conserved  | conserved |
| PDP2   | 0.00210875 | 0.14931443 | conserved  | conserved |
| PDPN   | 0.07846365 | 1.48062126 | mouse-RGL  | conserved |
| PDPR   | 0.45303689 | 0.0454706  | conserved  | conserved |
| PDRG1  | 0.17821897 | 1.13528263 | mouse-RGL  | conserved |
| PDS5A  | 2.18618477 | 0.60659373 | conserved  | conserved |
| PDS5B  | 1.77838579 | 0.52124843 | conserved  | conserved |
| PDSS1  | 0.61823623 | 0.07355837 | conserved  | conserved |
| PDSS2  | 1.4754154  | 0.15205389 | conserved  | conserved |
| PDXDC1 | 0.48907514 | 0.35975722 | conserved  | conserved |
| PDXK   | 0.64423817 | 0.14868375 | conserved  | conserved |
| PDYN   | 0.02447909 | 0.04025257 | conserved  | conserved |

|          |            |            |            |           |
|----------|------------|------------|------------|-----------|
| PDZD2    | 1.15446254 | 0.1215825  | monkey-NSC | conserved |
| PDZD3    | 0          | 0.00767122 | conserved  | conserved |
| PDZD4    | 0.27353242 | 0.14112248 | conserved  | conserved |
| PDZD7    | 0.31255614 | 0.00407917 | conserved  | conserved |
| PDZD9    | 0.05106413 | 0.01360586 | conserved  | conserved |
| PDZK1    | 0.19347054 | 0          | conserved  | conserved |
| PDZK1IP1 | 0          | 0          | conserved  | conserved |
| PDZRN3   | 1.76322418 | 0.31094713 | monkey-NSC | conserved |
| PDZRN4   | 21.7493    | 0.03050568 | monkey-NSC | conserved |
| PEAK1    | 0.85088567 | 0.15540425 | conserved  | conserved |
| PEBP4    | 0.01710514 | 0          | conserved  | conserved |
| PECAM1   | 0.03839495 | 0.02255024 | conserved  | conserved |
| PECR     | 0.3142935  | 0.12772858 | conserved  | conserved |
| PEG3     | 0.63820061 | 0.85681114 | conserved  | conserved |
| PELI2    | 3.33081133 | 0.38285216 | monkey-NSC | conserved |
| PELI3    | 0.03809163 | 0          | conserved  | conserved |
| PELO     | 0.00697111 | 0.31777724 | conserved  | conserved |
| PELP1    | 0.43459554 | 0.16482395 | conserved  | conserved |
| PEMT     | 0.11023784 | 0.11448224 | conserved  | conserved |
| PENK     | 0.02624824 | 0.00447496 | conserved  | conserved |
| PEPD     | 0.36742963 | 0.20159539 | conserved  | conserved |
| PER1     | 0.50948371 | 0.08591509 | conserved  | conserved |
| PER2     | 0.85565276 | 0.05321147 | conserved  | conserved |
| PER3     | 2.73743624 | 0.68128576 | conserved  | conserved |
| PERP     | 0.04959275 | 0.05535402 | conserved  | conserved |
| PES1     | 0.12714636 | 0.28126193 | conserved  | conserved |
| PET100   | 0.15088297 | 1.03804869 | conserved  | conserved |
| PEX1     | 0.74754567 | 0.0892083  | conserved  | conserved |
| PEX10    | 0.17258646 | 0.10623448 | conserved  | conserved |
| PEX11A   | 0.05852477 | 0.2312838  | conserved  | conserved |
| PEX11G   | 0.08120875 | 0.04109426 | conserved  | conserved |
| PEX12    | 0.0049343  | 0.14740366 | conserved  | conserved |
| PEX13    | 0.27207347 | 0.55323397 | conserved  | conserved |
| PEX14    | 1.06889895 | 0.27234778 | conserved  | conserved |
| PEX16    | 0.48591231 | 0.33424601 | conserved  | conserved |
| PEX2     | 0.35133483 | 1.24169705 | mouse-RGL  | conserved |
| PEX3     | 0.76931677 | 0.41979509 | conserved  | conserved |
| PEX5     | 0.10609496 | 0.19561121 | conserved  | conserved |
| PEX5L    | 3.2867422  | 0.02510256 | conserved  | conserved |
| PEX6     | 0.51380462 | 0.19145381 | conserved  | conserved |
| PEX7     | 0.34215002 | 0.43916757 | conserved  | conserved |

|         |            |            |            |           |
|---------|------------|------------|------------|-----------|
| PFAS    | 0.08760407 | 0.38527622 | conserved  | conserved |
| PFDN1   | 0.7332974  | 2.25248919 | mouse-RGL  | conserved |
| PFDN2   | 0.21858583 | 2.52189188 | mouse-RGL  | conserved |
| PFDN4   | 0.07205627 | 0.90587656 | conserved  | conserved |
| PFDN6   | 0.05993439 | 1.8006673  | mouse-RGL  | conserved |
| PFKFB1  | 0.00179078 | 0.00269126 | conserved  | conserved |
| PFKFB2  | 0.11327133 | 0.0869048  | conserved  | conserved |
| PFKFB3  | 1.72283802 | 0.3736184  | conserved  | conserved |
| PFKFB4  | 0.53439996 | 0.09032824 | conserved  | conserved |
| PFKL    | 0.81459618 | 0.2862846  | conserved  | conserved |
| PFKM    | 0.28185016 | 0.18943963 | conserved  | conserved |
| PFN4    | 0.03641718 | 0.03385316 | conserved  | conserved |
| PGAM2   | 0.03700677 | 0          | conserved  | conserved |
| PGAP1   | 0.8247654  | 0.23481103 | conserved  | conserved |
| PGAP2   | 0.41648405 | 0.31175829 | conserved  | conserved |
| PGAP3   | 0.11997955 | 0.02136194 | conserved  | conserved |
| PGBD1   | 0.4814453  | 0.04116373 | conserved  | conserved |
| PGBD5   | 1.6393411  | 0.04817717 | monkey-NSC | conserved |
| PGC     | 0.00233851 | 0          | conserved  | conserved |
| PGD     | 0.32814146 | 0.43586069 | conserved  | conserved |
| PGF     | 0.02079223 | 0.15875679 | conserved  | conserved |
| PGGT1B  | 0.34392507 | 0.10505916 | conserved  | conserved |
| PGLYRP1 | 0.02430119 | 0.0918193  | conserved  | conserved |
| PGLYRP2 | 0.00082797 | 0          | conserved  | conserved |
| PGLYRP4 | 0          | 0          | conserved  | conserved |
| PGM2    | 0.16681872 | 0.27166323 | conserved  | conserved |
| PGM2L1  | 0.85166775 | 0.1901306  | conserved  | conserved |
| PGM3    | 0.3495267  | 0.18862379 | conserved  | conserved |
| PGM5    | 0.03104849 | 0.07062065 | conserved  | conserved |
| PGPEP1  | 0.28205135 | 0.98182156 | conserved  | conserved |
| PGRMC1  | 0.22679944 | 1.32244459 | conserved  | conserved |
| PGRMC2  | 0.13562204 | 0.39435605 | conserved  | conserved |
| PGS1    | 0.22220869 | 0.31913388 | conserved  | conserved |
| PHACTR1 | 15.2870594 | 0.88993897 | conserved  | conserved |
| PHACTR2 | 0.81642903 | 0.28776717 | conserved  | conserved |
| PHACTR3 | 4.33401485 | 0.23882907 | monkey-NSC | conserved |
| PHACTR4 | 1.31901952 | 0.24259843 | conserved  | conserved |
| PHAX    | 0.25195417 | 0.74405647 | conserved  | conserved |
| PHC1    | 0.35388083 | 0.16580675 | conserved  | conserved |
| PHC2    | 0.88315824 | 0.230209   | conserved  | conserved |
| PHC3    | 1.77856683 | 0.33241831 | conserved  | conserved |

|          |            |            |            |           |
|----------|------------|------------|------------|-----------|
| PHEX     | 0.16388208 | 0.00262906 | conserved  | conserved |
| PHF1     | 0.53067655 | 0.17409915 | conserved  | conserved |
| PHF10    | 0.34137323 | 0.22329387 | conserved  | conserved |
| PHF12    | 0.57451221 | 0.36044808 | conserved  | conserved |
| PHF13    | 0.05686464 | 0.12193921 | conserved  | conserved |
| PHF14    | 3.39270841 | 0.64330362 | conserved  | conserved |
| PHF19    | 0.27095061 | 0.03662969 | conserved  | conserved |
| PHF2     | 0.53320869 | 0.27561526 | conserved  | conserved |
| PHF20    | 1.33810333 | 0.41608913 | conserved  | conserved |
| PHF20L1  | 1.26554704 | 0.57025406 | conserved  | conserved |
| PHF21A   | 4.23798393 | 0.71355877 | conserved  | conserved |
| PHF21B   | 3.44803769 | 0.08373729 | conserved  | conserved |
| PHF23    | 0.05204643 | 0.50290071 | conserved  | conserved |
| PHF24    | 0.1275035  | 0.04208832 | conserved  | conserved |
| PHF3     | 1.45113269 | 0.49525906 | conserved  | conserved |
| PHF6     | 0.28625255 | 0.42961679 | conserved  | conserved |
| PHF7     | 0.25844623 | 0.04785503 | conserved  | conserved |
| PHF8     | 0.60729117 | 0.1310147  | conserved  | conserved |
| PHGDH    | 1.10309595 | 3.91480863 | mouse-RGL  | conserved |
| PHIP     | 4.58917805 | 1.3390071  | conserved  | conserved |
| PHKA1    | 3.85530424 | 0.0654858  | conserved  | conserved |
| PHKA2    | 0.96361742 | 0.06016418 | conserved  | conserved |
| PHKB     | 3.25388355 | 0.42647895 | conserved  | conserved |
| PHKG1    | 0.76419968 | 0.47528531 | conserved  | conserved |
| PHKG2    | 0.46106362 | 0.49356377 | conserved  | conserved |
| PHLDA1   | 0.03653318 | 0.62269851 | conserved  | conserved |
| PHLDA2   | 0          | 0.00311524 | conserved  | conserved |
| PHLDB1   | 0.57210847 | 0.0685135  | conserved  | conserved |
| PHLDB2   | 0.09526521 | 0.1100901  | conserved  | conserved |
| PHLDB3   | 0.02531704 | 0          | conserved  | conserved |
| PHLPP1   | 11.4660151 | 0.79031385 | monkey-NSC | conserved |
| PHLPP2   | 0.69687329 | 0.17417798 | conserved  | conserved |
| PHOSPHO1 | 0.00230962 | 0          | conserved  | conserved |
| PHPT1    | 0.27260809 | 1.87104314 | conserved  | conserved |
| PHRF1    | 0.6084222  | 0.21041317 | conserved  | conserved |
| PHTF1    | 0.81204999 | 0.13946479 | conserved  | conserved |
| PHTF2    | 0.82330207 | 0.06172682 | conserved  | conserved |
| PHYH     | 0.26492282 | 0.32603572 | conserved  | conserved |
| PHYHIP   | 0.12263956 | 0.07291948 | conserved  | conserved |
| PHYHIPL  | 2.52506484 | 0.6451739  | conserved  | conserved |
| PHYKPL   | 0.40138316 | 0.08535437 | conserved  | conserved |

|         |            |            |            |           |
|---------|------------|------------|------------|-----------|
| PI15    | 0.02438985 | 0          | conserved  | conserved |
| PI16    | 0.01955156 | 0.00433653 | conserved  | conserved |
| PI4K2A  | 1.02445829 | 0.20412114 | conserved  | conserved |
| PI4KA   | 2.47998212 | 0.22215181 | monkey-NSC | conserved |
| PI4KB   | 0.52686898 | 0.11565412 | conserved  | conserved |
| PIAS1   | 2.23257034 | 0.2980458  | monkey-NSC | conserved |
| PIAS2   | 1.51091332 | 0.50328883 | conserved  | conserved |
| PIAS4   | 0.16321185 | 0.4074389  | conserved  | conserved |
| PIBF1   | 2.05339941 | 0.14589357 | conserved  | conserved |
| PICALM  | 2.11232166 | 0.5265739  | conserved  | conserved |
| PID1    | 2.00474997 | 0.25626309 | monkey-NSC | conserved |
| PIDD1   | 0.1082256  | 0.00860255 | conserved  | conserved |
| PIF1    | 0.00495584 | 0          | conserved  | conserved |
| PIFO    | 0.0119472  | 0.06736697 | conserved  | conserved |
| PIGA    | 0.15331998 | 0.11269405 | conserved  | conserved |
| PIGB    | 0.40308717 | 0.11628123 | conserved  | conserved |
| PIGC    | 0.03161484 | 0.2549447  | conserved  | conserved |
| PIGF    | 0.43517287 | 0.31114622 | conserved  | conserved |
| PIGG    | 0.56664114 | 0.03639669 | conserved  | conserved |
| PIGH    | 0.0668289  | 0.14886886 | conserved  | conserved |
| PIGK    | 0.44956669 | 0.19866274 | conserved  | conserved |
| PIGL    | 0.89093393 | 0.09436589 | conserved  | conserved |
| PIGN    | 0.67175325 | 0.12212125 | conserved  | conserved |
| PIGO    | 0.04517578 | 0.04977934 | conserved  | conserved |
| PIGP    | 0.15158315 | 1.4258274  | mouse-RGL  | conserved |
| PIGQ    | 0.07150073 | 0.35958158 | conserved  | conserved |
| PIGR    | 0.01627639 | 0          | conserved  | conserved |
| PIGS    | 0.21547163 | 0.43624501 | conserved  | conserved |
| PIGV    | 0.03679693 | 0.0887677  | conserved  | conserved |
| PIGW    | 0.00376989 | 0.02229497 | conserved  | conserved |
| PIGX    | 0.4369709  | 0.75685228 | conserved  | conserved |
| PIH1D2  | 0.04934769 | 0.09973988 | conserved  | conserved |
| PIK3AP1 | 0.02820826 | 0          | conserved  | conserved |
| PIK3C2A | 1.3269852  | 0.38871137 | conserved  | conserved |
| PIK3C2B | 0.25668514 | 0.03824893 | conserved  | conserved |
| PIK3C2G | 0.05634352 | 0.00140814 | conserved  | conserved |
| PIK3C3  | 1.52251054 | 0.10219453 | conserved  | conserved |
| PIK3CA  | 1.01015874 | 0.64451175 | conserved  | conserved |
| PIK3CB  | 2.04262622 | 0.01842096 | monkey-NSC | conserved |
| PIK3CD  | 0.12206183 | 0.01460278 | conserved  | conserved |
| PIK3CG  | 0.00332606 | 0.01033257 | conserved  | conserved |

|         |            |            |            |                      |
|---------|------------|------------|------------|----------------------|
| PIK3IP1 | 0.26222614 | 0.8238868  | conserved  | conserved            |
| PIK3R1  | 2.67873871 | 0.80206077 | monkey-NSC | conserved            |
| PIK3R4  | 0.37822968 | 0.15735192 | conserved  | conserved            |
| PIK3R5  | 0.02621144 | 0          | conserved  | conserved            |
| PIK3R6  | 0.02427583 | 0          | conserved  | conserved            |
| PIKFYVE | 1.03636841 | 0.17602307 | conserved  | conserved            |
| PINK1   | 0.22034317 | 0.5780046  | conserved  | conserved            |
| PINLYP  | 0.00095911 | 0          | conserved  | conserved            |
| PINX1   | 0.27521559 | 0.28403051 | conserved  | conserved            |
| PIP     | 0.00644635 | 0          | conserved  | conserved            |
| PIP4K2A | 1.97943012 | 0.13826363 | monkey-NSC | conserved            |
| PIP4K2B | 1.21280442 | 0.22398621 | conserved  | conserved            |
| PIP4K2C | 0.26779815 | 0.15062082 | conserved  | conserved            |
| PIP5K1B | 0.17519287 | 0.03031831 | conserved  | conserved            |
| PIPOX   | 1.37506318 | 0.048664   | monkey-NSC | monkey-NSC1-enriched |
| PIR     | 0.77017569 | 0.20576004 | conserved  | conserved            |
| PIRT    | 0.01050648 | 0          | conserved  | conserved            |
| PITHD1  | 0.28166904 | 0.43330844 | conserved  | conserved            |
| PITPNA  | 0.65622655 | 0.74259702 | conserved  | conserved            |
| PITPNB  | 0.37113791 | 0.51767362 | conserved  | conserved            |
| PITPNM1 | 0.09741598 | 0.06322875 | conserved  | conserved            |
| PITPNM2 | 1.17620571 | 0.29451427 | conserved  | conserved            |
| PITRM1  | 0.2732052  | 0.17181461 | conserved  | conserved            |
| PIWIL1  | 0.03299605 | 0          | conserved  | conserved            |
| PIWIL2  | 0.09130879 | 0          | conserved  | conserved            |
| PIWIL4  | 0.00325016 | 0          | conserved  | conserved            |
| PJA2    | 1.09608492 | 0.91355275 | conserved  | conserved            |
| PKD1L1  | 0.04261121 | 0          | conserved  | conserved            |
| PKD2L1  | 0.03403919 | 0          | conserved  | conserved            |
| PKD2L2  | 0.06334966 | 0          | conserved  | conserved            |
| PKDCC   | 0.03164669 | 0.04950431 | conserved  | conserved            |
| PKHD1   | 0.04026644 | 0          | conserved  | conserved            |
| PKHD1L1 | 0.2507523  | 0          | conserved  | conserved            |
| PKIB    | 0.01495074 | 0.04571341 | conserved  | conserved            |
| PKIG    | 0.18693015 | 1.83887058 | conserved  | conserved            |
| PKLR    | 0.00406743 | 0          | conserved  | conserved            |
| PKMYT1  | 0.00718462 | 0.04414874 | conserved  | conserved            |
| PKN1    | 0.51386324 | 0.16540182 | conserved  | conserved            |
| PKN2    | 2.04784466 | 0.89702296 | conserved  | conserved            |
| PKNOX1  | 0.17143033 | 0.11077039 | conserved  | conserved            |
| PKNOX2  | 1.82998162 | 0.03757429 | monkey-NSC | conserved            |



|          |            |            |            |           |
|----------|------------|------------|------------|-----------|
| PKP1     | 0.00563772 | 0          | conserved  | conserved |
| PKP2     | 0.55044035 | 0.07943617 | conserved  | conserved |
| PKP4     | 1.74442078 | 0.22463466 | conserved  | conserved |
| PLA1A    | 0.00516959 | 0          | conserved  | conserved |
| PLA2G12B | 0.00784302 | 0          | conserved  | conserved |
| PLA2G15  | 0.16469767 | 0.01970045 | conserved  | conserved |
| PLA2G1B  | 0.01242955 | 0          | conserved  | conserved |
| PLA2G2C  | 0.00395494 | 0          | conserved  | conserved |
| PLA2G2D  | 0.00102425 | 0          | conserved  | conserved |
| PLA2G2F  | 0.02999035 | 0          | conserved  | conserved |
| PLA2G4A  | 0.09679652 | 0          | conserved  | conserved |
| PLA2G4C  | 0.30946279 | 0.00990816 | conserved  | conserved |
| PLA2G4D  | 0.00166571 | 0          | conserved  | conserved |
| PLA2G4E  | 0.00176009 | 0          | conserved  | conserved |
| PLA2G4F  | 0.00116656 | 0          | conserved  | conserved |
| PLA2G6   | 0.63960332 | 0.10597079 | conserved  | conserved |
| PLA2G7   | 0.04221168 | 2.47055108 | conserved  | conserved |
| PLAC8    | 0.01621871 | 0          | conserved  | conserved |
| PLAC8L1  | 0.03842402 | 0          | conserved  | conserved |
| PLAG1    | 0.11074543 | 0          | conserved  | conserved |
| PLAGL1   | 0.09837606 | 0.46241156 | conserved  | conserved |
| PLAGL2   | 0.09575905 | 0.09049102 | conserved  | conserved |
| PLAT     | 0.07671016 | 0.24765117 | conserved  | conserved |
| PLAU     | 0.01147828 | 0          | conserved  | conserved |
| PLAUR    | 0.05693856 | 0          | conserved  | conserved |
| PLB1     | 0.04309492 | 0.00828489 | conserved  | conserved |
| PLBD1    | 0.01604731 | 0          | conserved  | conserved |
| PLBD2    | 0.4609378  | 0.1565726  | conserved  | conserved |
| PLCB1    | 23.802849  | 0.37814776 | monkey-NSC | conserved |
| PLCB3    | 0.11086821 | 0.20239903 | conserved  | conserved |
| PLCB4    | 1.39783914 | 0.18775337 | conserved  | conserved |
| PLCD1    | 0.34352881 | 0.16267909 | conserved  | conserved |
| PLCD4    | 0.25188011 | 0.41170147 | conserved  | conserved |
| PLCE1    | 7.1870251  | 0.36375063 | conserved  | conserved |
| PLCG1    | 1.23924765 | 0.23149497 | conserved  | conserved |
| PLCG2    | 0.07101272 | 0.0031327  | conserved  | conserved |
| PLCH1    | 0.84535825 | 0.07770988 | conserved  | conserved |
| PLCH2    | 0.04022283 | 0.00374955 | conserved  | conserved |
| PLCL1    | 1.53504203 | 0.12554466 | conserved  | conserved |
| PLCL2    | 0.62957413 | 0.03086388 | conserved  | conserved |
| PLCZ1    | 0.00605627 | 0          | conserved  | conserved |

|         |            |            |            |           |
|---------|------------|------------|------------|-----------|
| PLD1    | 0.3153319  | 0.19395544 | conserved  | conserved |
| PLD2    | 0.37448001 | 0.31079118 | conserved  | conserved |
| PLD3    | 2.85340476 | 0.38990754 | conserved  | conserved |
| PLD4    | 0          | 0.01114333 | conserved  | conserved |
| PLD5    | 0.2979743  | 0.01617983 | conserved  | conserved |
| PLD6    | 0.01554153 | 0.00768603 | conserved  | conserved |
| PLEK    | 0.05304978 | 0.02517487 | conserved  | conserved |
| PLEK2   | 0.00625304 | 0.00365779 | conserved  | conserved |
| PLEKHA1 | 0.80598977 | 0.12213936 | conserved  | conserved |
| PLEKHA3 | 0.17455894 | 0.08517344 | conserved  | conserved |
| PLEKHA4 | 0.01627624 | 0.0167145  | conserved  | conserved |
| PLEKHA5 | 5.5372975  | 0.15859488 | conserved  | conserved |
| PLEKHA6 | 3.81516784 | 0.03325699 | monkey-NSC | conserved |
| PLEKHA7 | 3.66046237 | 0.10491473 | conserved  | conserved |
| PLEKHA8 | 0.30911446 | 0.10938921 | conserved  | conserved |
| PLEKHB1 | 0.5852564  | 0.41828691 | conserved  | conserved |
| PLEKHD1 | 0.03411123 | 0          | conserved  | conserved |
| PLEKHF2 | 0.12094699 | 0.42830972 | conserved  | conserved |
| PLEKHG1 | 2.22466105 | 0.36273239 | monkey-NSC | conserved |
| PLEKHG2 | 0.24472574 | 0.13630135 | conserved  | conserved |
| PLEKHG3 | 0.68846785 | 0.05513507 | conserved  | conserved |
| PLEKHG5 | 0.10889101 | 0.04435451 | conserved  | conserved |
| PLEKHG6 | 0.0285669  | 0          | conserved  | conserved |
| PLEKHH1 | 0.90415949 | 0.01004341 | conserved  | conserved |
| PLEKHH2 | 0.71149797 | 0.00343217 | conserved  | conserved |
| PLEKHM2 | 1.33049949 | 0.12851347 | conserved  | conserved |
| PLEKHM3 | 0.97668107 | 0.04426498 | conserved  | conserved |
| PLEKHN1 | 0.00078627 | 0.01343586 | conserved  | conserved |
| PLEKHO1 | 0.64462281 | 0.49479948 | conserved  | conserved |
| PLEKHS1 | 0.00523058 | 0.00636644 | conserved  | conserved |
| PLGRKT  | 0.39384817 | 0.78223768 | conserved  | conserved |
| PLIN1   | 0.11296643 | 0.01274464 | conserved  | conserved |
| PLIN3   | 0.14940014 | 0.47373208 | conserved  | conserved |
| PLIN4   | 0.02552437 | 0.00809923 | conserved  | conserved |
| PLIN5   | 0.25258816 | 0.00194484 | conserved  | conserved |
| PLK1    | 0.26840368 | 0.00708687 | conserved  | conserved |
| PLK2    | 0.18879575 | 0.18457745 | conserved  | conserved |
| PLK3    | 0.03820951 | 0.02019974 | conserved  | conserved |
| PLK4    | 0.04128909 | 0.09823871 | conserved  | conserved |
| PLOD1   | 0.1723584  | 0.21640543 | conserved  | conserved |
| PLOD2   | 0.49569964 | 0.28255548 | conserved  | conserved |

|        |            |            |            |           |
|--------|------------|------------|------------|-----------|
| PLOD3  | 0.0546248  | 0.10635141 | conserved  | conserved |
| PLP1   | 1.60955476 | 0.47368052 | monkey-NSC | conserved |
| PLPP1  | 0.94450618 | 0.23366958 | conserved  | conserved |
| PLPP5  | 0.31336208 | 0.15500827 | conserved  | conserved |
| PLPP7  | 0.07635566 | 0.13883451 | conserved  | conserved |
| PLPPR1 | 1.24156253 | 0.14679033 | monkey-NSC | conserved |
| PLPPR2 | 0.5076289  | 0.27306814 | conserved  | conserved |
| PLPPR4 | 0.98906619 | 0.12947625 | conserved  | conserved |
| PLPPR5 | 0.75886622 | 0.08181101 | conserved  | conserved |
| PLRG1  | 0.09503304 | 0.16489402 | conserved  | conserved |
| PLS3   | 0.16454019 | 0.20618868 | conserved  | conserved |
| PLSCR4 | 0.63048445 | 0.13130461 | conserved  | conserved |
| PLSCR5 | 0.0009451  | 0          | conserved  | conserved |
| PLTP   | 0.45323382 | 0.15313077 | conserved  | conserved |
| PLVAP  | 0.01022308 | 0.01064581 | conserved  | conserved |
| PLXDC1 | 0.0437433  | 0.00387386 | conserved  | conserved |
| PLXDC2 | 5.17744802 | 0.18374981 | monkey-NSC | conserved |
| PLXNA1 | 0.22516273 | 0.12567082 | conserved  | conserved |
| PLXNA2 | 1.80287431 | 0.68414548 | conserved  | conserved |
| PLXNA3 | 0.17924795 | 0.18072484 | conserved  | conserved |
| PLXNA4 | 2.16986774 | 0.14933055 | conserved  | conserved |
| PLXNB1 | 1.31700305 | 1.17854408 | monkey-NSC | conserved |
| PLXNB2 | 0.23947524 | 0.47408775 | conserved  | conserved |
| PM20D1 | 0.01746055 | 0.03212846 | conserved  | conserved |
| PMCH   | 0          | 0.00707158 | conserved  | conserved |
| PMEL   | 0.00228532 | 0.00442308 | conserved  | conserved |
| PMEPA1 | 0.18684979 | 0.35399262 | conserved  | conserved |
| PMFBP1 | 0.0611434  | 0          | conserved  | conserved |
| PML    | 0.30608072 | 0.06214611 | conserved  | conserved |
| PMM1   | 0.13311459 | 1.25260475 | conserved  | conserved |
| PMM2   | 0.28616372 | 0.22404928 | conserved  | conserved |
| PMP2   | 0.01936132 | 0          | conserved  | conserved |
| PMP22  | 1.96307966 | 0.34067968 | conserved  | conserved |
| PMPCA  | 0.1525866  | 0.41841442 | conserved  | conserved |
| PMPCB  | 0.21616839 | 0.35702275 | conserved  | conserved |
| PMS1   | 0.74711874 | 0.04726737 | conserved  | conserved |
| PMVK   | 0.06867382 | 1.31108201 | conserved  | conserved |
| PNCK   | 0.03778849 | 0.24452214 | conserved  | conserved |
| PNISR  | 4.20874189 | 4.65933829 | conserved  | conserved |
| PNKP   | 0.16341997 | 0.24453183 | conserved  | conserved |
| PNLDC1 | 0.07172403 | 0          | conserved  | conserved |

|          |            |            |            |           |
|----------|------------|------------|------------|-----------|
| PNLIP    | 0.00402631 | 0          | conserved  | conserved |
| PNLIPRP1 | 0.00514396 | 0          | conserved  | conserved |
| PNLIPRP2 | 0.00107904 | 0          | conserved  | conserved |
| PNMA1    | 0.01015933 | 0.00645985 | conserved  | conserved |
| PNMA2    | 0.02162608 | 0.02196034 | conserved  | conserved |
| PNMA3    | 0.02500144 | 0.03853852 | conserved  | conserved |
| PNOC     | 0.02544318 | 0.00069856 | conserved  | conserved |
| PNPLA1   | 0.01851507 | 0          | conserved  | conserved |
| PNPLA3   | 0.62950602 | 0.02863897 | conserved  | conserved |
| PNPLA5   | 0          | 0          | conserved  | conserved |
| PNPLA7   | 0.61276888 | 0.11624322 | monkey-NSC | conserved |
| PNPLA8   | 0.5007993  | 0.67921358 | conserved  | conserved |
| PNPO     | 0.09318011 | 0.04377472 | conserved  | conserved |
| PNPT1    | 0.47974812 | 0.10522584 | conserved  | conserved |
| PNRC2    | 0.09394488 | 1.26225759 | mouse-RGL  | conserved |
| POC1A    | 0.03207405 | 0.02425888 | conserved  | conserved |
| POC1B    | 1.51705489 | 0.19766214 | conserved  | conserved |
| PODN     | 0.01364943 | 0.04066168 | conserved  | conserved |
| PODXL2   | 0.12096369 | 1.16255845 | conserved  | conserved |
| POFUT1   | 0.79469002 | 0.27989802 | conserved  | conserved |
| POGK     | 0.19578012 | 0.42710455 | conserved  | conserved |
| POGLUT1  | 0.42044833 | 0.34887834 | conserved  | conserved |
| POGZ     | 4.60165792 | 0.33883169 | conserved  | conserved |
| POLA1    | 0.96467456 | 0.0840599  | conserved  | conserved |
| POLD1    | 0.03828081 | 0.06892997 | conserved  | conserved |
| POLD2    | 0.08740874 | 0.3812078  | conserved  | conserved |
| POLDIP2  | 0.09058406 | 0.88770642 | mouse-RGL  | conserved |
| POLDIP3  | 0.22265726 | 0.48185759 | conserved  | conserved |
| POLE4    | 0.05849887 | 1.44461086 | mouse-RGL  | conserved |
| POLG     | 0.19080812 | 0.28915047 | conserved  | conserved |
| POLG2    | 0.15093986 | 0.11870241 | conserved  | conserved |
| POLH     | 0.33744116 | 0          | conserved  | conserved |
| POLI     | 0.35955388 | 0.05975856 | conserved  | conserved |
| POLK     | 0.97810477 | 0.05908355 | conserved  | conserved |
| POLM     | 0.02145855 | 0.08371529 | conserved  | conserved |
| POLN     | 0.26012377 | 0.00467569 | conserved  | conserved |
| POLQ     | 0.04130676 | 0.00717356 | conserved  | conserved |
| POLR1A   | 0.36910067 | 0.16243962 | conserved  | conserved |
| POLR1B   | 0.35035124 | 0.10104313 | conserved  | conserved |
| POLR1C   | 0.1328725  | 0.7116941  | conserved  | conserved |
| POLR1E   | 0.08353366 | 0.10553358 | conserved  | conserved |

|         |            |            |            |           |
|---------|------------|------------|------------|-----------|
| POLR2B  | 0.53933274 | 0.28639653 | conserved  | conserved |
| POLR2C  | 0.04549546 | 0.81778859 | conserved  | conserved |
| POLR2D  | 0.10508126 | 0.83014444 | conserved  | conserved |
| POLR2E  | 0.14363033 | 1.41519115 | mouse-RGL  | conserved |
| POLR2F  | 0.39892702 | 2.36351538 | conserved  | conserved |
| POLR2G  | 0.0870279  | 1.20079736 | mouse-RGL  | conserved |
| POLR2H  | 0.08191977 | 0.82701001 | mouse-RGL  | conserved |
| POLR2I  | 0.00950059 | 1.64241615 | mouse-RGL  | conserved |
| POLR3A  | 0.74633321 | 0.08087687 | conserved  | conserved |
| POLR3B  | 0.46845232 | 0.1321172  | conserved  | conserved |
| POLR3C  | 0.19686661 | 0.24831967 | conserved  | conserved |
| POLR3D  | 0.08374828 | 0.25853153 | conserved  | conserved |
| POLR3E  | 0.47422004 | 0.12364108 | conserved  | conserved |
| POLR3F  | 0.17145836 | 0.25843577 | conserved  | conserved |
| POLR3H  | 0.24085312 | 2.61054032 | mouse-RGL  | conserved |
| POMGNT1 | 0.27377276 | 0.23296571 | conserved  | conserved |
| POMGNT2 | 0.06800775 | 0.06310363 | conserved  | conserved |
| POMP    | 0.20511276 | 3.4398556  | mouse-RGL  | conserved |
| POMT1   | 0.33260118 | 0.12861847 | conserved  | conserved |
| POMT2   | 0.22310117 | 0.10707468 | conserved  | conserved |
| PON1    | 0.00358261 | 0          | conserved  | conserved |
| PON2    | 1.31437294 | 1.5305998  | conserved  | conserved |
| PON3    | 0.40465751 | 0.01921496 | conserved  | conserved |
| POP4    | 0.03077942 | 0.36442517 | conserved  | conserved |
| POP5    | 0.11056061 | 0.61674732 | conserved  | conserved |
| POP7    | 0.0428962  | 0.47602039 | conserved  | conserved |
| POPDC2  | 0.04091959 | 0.01286248 | conserved  | conserved |
| POPDC3  | 0.06006262 | 0.00872013 | conserved  | conserved |
| POR     | 0.536375   | 0.43853895 | conserved  | conserved |
| PORCN   | 0.02490173 | 0.16584757 | conserved  | conserved |
| POSTN   | 0.01545028 | 0          | conserved  | conserved |
| POU1F1  | 0          | 0          | conserved  | conserved |
| POU2AF1 | 0.00577429 | 0          | conserved  | conserved |
| POU2F1  | 5.04305217 | 0.91335741 | monkey-NSC | conserved |
| POU2F2  | 0.05180285 | 0.08411576 | conserved  | conserved |
| POU2F3  | 0.04839365 | 0.00203474 | conserved  | conserved |
| POU3F4  | 0.01527444 | 0.09377558 | conserved  | conserved |
| POU4F2  | 0          | 0          | conserved  | conserved |
| POU6F1  | 0.68364801 | 0.34974283 | conserved  | conserved |
| POU6F2  | 0.39957277 | 0.00243806 | conserved  | conserved |
| PP2D1   | 0.08366768 | 0          | conserved  | conserved |

|          |            |            |            |                      |
|----------|------------|------------|------------|----------------------|
| PPA1     | 0.30153698 | 0.79301073 | conserved  | conserved            |
| PPA2     | 1.12718594 | 0.59085163 | conserved  | conserved            |
| PPARA    | 1.08943492 | 0.05378956 | monkey-NSC | conserved            |
| PPARD    | 0.14887766 | 0.08972161 | conserved  | conserved            |
| PPARG    | 0.20675819 | 0.00382203 | conserved  | conserved            |
| PPARGC1A | 1.62261529 | 0.28652886 | monkey-NSC | conserved            |
| PPARGC1B | 0.18332232 | 0.01450092 | conserved  | conserved            |
| PPAT     | 0.17546062 | 0.12146863 | conserved  | conserved            |
| PPBP     | 0          | 0          | conserved  | conserved            |
| PPEF1    | 0.09716477 | 0          | conserved  | conserved            |
| PPEF2    | 0.00973241 | 0.06185163 | conserved  | conserved            |
| PPFIA1   | 3.18116594 | 0.21402433 | conserved  | conserved            |
| PPFIA2   | 10.8751199 | 0.0392702  | monkey-NSC | conserved            |
| PPFIA4   | 0.34261635 | 0.02794276 | conserved  | conserved            |
| PPFIBP1  | 0.72950817 | 0.04854629 | conserved  | conserved            |
| PPFIBP2  | 0.43443807 | 0.09008417 | conserved  | conserved            |
| PPHLN1   | 1.39695339 | 0.3114777  | conserved  | conserved            |
| PPIB     | 0.2862113  | 2.61675073 | conserved  | conserved            |
| PPIC     | 0.11024043 | 0.24943231 | conserved  | conserved            |
| PPIE     | 0.09690062 | 0.39657862 | conserved  | conserved            |
| PPIF     | 0.04443697 | 0.14231409 | conserved  | conserved            |
| PPIL4    | 0.40176361 | 0.39070126 | conserved  | conserved            |
| PPIL6    | 0.3224298  | 0.05682736 | conserved  | conserved            |
| PPIP5K2  | 1.31534438 | 0.09645736 | conserved  | conserved            |
| PPM1E    | 0.46398343 | 0.16545051 | conserved  | conserved            |
| PPM1F    | 0.22579073 | 0.16576426 | conserved  | conserved            |
| PPM1G    | 0.33853542 | 0.62324699 | conserved  | conserved            |
| PPM1H    | 1.54848287 | 0.08174597 | monkey-NSC | monkey-NSC1-enriched |
| PPM1K    | 0.56087665 | 0.31472764 | conserved  | conserved            |
| PPM1L    | 3.56211403 | 0.26859794 | conserved  | conserved            |
| PPM1M    | 0.01448052 | 0.26989667 | conserved  | conserved            |
| PPM1N    | 0.01544792 | 0.02670732 | conserved  | conserved            |
| PPME1    | 0.76054488 | 0.36407579 | conserved  | conserved            |
| PPOX     | 0.29159139 | 0.32321841 | conserved  | conserved            |
| PPP1CA   | 0.08715558 | 3.47569602 | mouse-RGL  | conserved            |
| PPP1CB   | 1.96332033 | 1.93398687 | conserved  | conserved            |
| PPP1R10  | 0.59501253 | 0.51512981 | conserved  | conserved            |
| PPP1R11  | 0.10367739 | 1.51999174 | conserved  | conserved            |
| PPP1R12A | 3.56278642 | 0.50516836 | conserved  | conserved            |
| PPP1R12B | 5.69676521 | 0.11610685 | monkey-NSC | conserved            |
| PPP1R13B | 1.25027014 | 0.060084   | monkey-NSC | conserved            |

|          |            |            |            |           |
|----------|------------|------------|------------|-----------|
| PPP1R14C | 0.26362506 | 0.63052666 | conserved  | conserved |
| PPP1R15A | 0.04551124 | 0.71512412 | mouse-RGL  | conserved |
| PPP1R15B | 0.11251886 | 0.28611472 | conserved  | conserved |
| PPP1R17  | 1.63450748 | 0          | monkey-NSC | conserved |
| PPP1R18  | 0.02587086 | 0.04249246 | conserved  | conserved |
| PPP1R1C  | 0.06811335 | 0          | conserved  | conserved |
| PPP1R21  | 0.69278562 | 0.15746589 | conserved  | conserved |
| PPP1R35  | 0.25764111 | 0.59910101 | conserved  | conserved |
| PPP1R37  | 0.2920305  | 0.36756617 | conserved  | conserved |
| PPP1R3B  | 0.00624896 | 0          | conserved  | conserved |
| PPP1R3C  | 1.23192855 | 0.46658893 | monkey-NSC | conserved |
| PPP1R3E  | 0.00556787 | 0.02734632 | conserved  | conserved |
| PPP1R42  | 0.19588585 | 0.01741792 | conserved  | conserved |
| PPP1R9A  | 2.78405894 | 0.69545928 | conserved  | conserved |
| PPP1R9B  | 0.11047113 | 0.36494285 | conserved  | conserved |
| PPP2CB   | 0.60102033 | 0.3624604  | conserved  | conserved |
| PPP2R1A  | 0.45947665 | 1.00771669 | conserved  | conserved |
| PPP2R1B  | 1.00884098 | 0.16452042 | conserved  | conserved |
| PPP2R2A  | 1.03086254 | 0.95954398 | conserved  | conserved |
| PPP2R2B  | 18.5380418 | 1.1748206  | conserved  | conserved |
| PPP2R2C  | 1.25045325 | 0.10336454 | conserved  | conserved |
| PPP2R2D  | 0.90341142 | 0.31095652 | conserved  | conserved |
| PPP2R3A  | 1.54420595 | 0.44347855 | conserved  | conserved |
| PPP2R3C  | 0.48672481 | 0.4416841  | conserved  | conserved |
| PPP2R5A  | 2.15962633 | 0.52503287 | conserved  | conserved |
| PPP2R5B  | 0.2175526  | 0.38908663 | conserved  | conserved |
| PPP2R5D  | 0.28572963 | 0.3173693  | conserved  | conserved |
| PPP2R5E  | 2.30348158 | 0.56476057 | conserved  | conserved |
| PPP3CA   | 11.5581108 | 2.11308528 | conserved  | conserved |
| PPP3CB   | 0.95922166 | 0.56569252 | conserved  | conserved |
| PPP3CC   | 1.26606079 | 0.05039608 | conserved  | conserved |
| PPP4C    | 0.26053673 | 1.18078057 | conserved  | conserved |
| PPP4R4   | 0.65296102 | 0.02904238 | conserved  | conserved |
| PPP5C    | 0.71094764 | 0.49037636 | conserved  | conserved |
| PPP6R1   | 0.35305808 | 0.06643474 | conserved  | conserved |
| PPP6R2   | 1.58243954 | 0.03504215 | monkey-NSC | conserved |
| PPP6R3   | 1.82661694 | 0.31332098 | conserved  | conserved |
| PPRC1    | 0.15886925 | 0.0713524  | conserved  | conserved |
| PPT1     | 0.23661363 | 0.9643046  | conserved  | conserved |
| PPWD1    | 0.50453671 | 0.10600781 | conserved  | conserved |
| PPY      | 0          | 0          | conserved  | conserved |

|          |            |            |            |           |
|----------|------------|------------|------------|-----------|
| PQBP1    | 0.07408685 | 0.41274324 | conserved  | conserved |
| PRC1     | 0.11577098 | 0.06357436 | conserved  | conserved |
| PRCP     | 0.84248888 | 0.28203215 | conserved  | conserved |
| PRDM1    | 0.09226495 | 0          | conserved  | conserved |
| PRDM10   | 0.73462133 | 0.04113666 | conserved  | conserved |
| PRDM11   | 0.23015247 | 0.13455125 | conserved  | conserved |
| PRDM13   | 0          | 0          | conserved  | conserved |
| PRDM16   | 2.32578433 | 0.16819428 | monkey-NSC | conserved |
| PRDM4    | 0.258579   | 0.12662324 | conserved  | conserved |
| PRDM5    | 1.55980168 | 0.20621713 | conserved  | conserved |
| PRDM8    | 0.12469916 | 0.06030029 | conserved  | conserved |
| PRDX1    | 0.06108774 | 7.14972508 | mouse-RGL  | conserved |
| PRDX3    | 0.33956504 | 0.58126339 | conserved  | conserved |
| PRDX4    | 0.04262548 | 0.83281197 | conserved  | conserved |
| PRDX5    | 0.21731041 | 3.13777697 | mouse-RGL  | conserved |
| PRELID2  | 0.01218301 | 0.05220284 | conserved  | conserved |
| PRELP    | 0.30763176 | 0.39728841 | conserved  | conserved |
| PREP     | 0.75959363 | 0.04477921 | conserved  | conserved |
| PREPL    | 1.46223218 | 0.03246509 | conserved  | conserved |
| PREX1    | 7.94030834 | 1.04683977 | monkey-NSC | conserved |
| PREX2    | 15.4234648 | 2.01275243 | monkey-NSC | conserved |
| PRG3     | 0          | 0          | conserved  | conserved |
| PRG4     | 0          | 0          | conserved  | conserved |
| PRICKLE1 | 0.76309179 | 0.07812495 | conserved  | conserved |
| PRICKLE2 | 1.69644018 | 0.14604937 | monkey-NSC | conserved |
| PRICKLE3 | 0.01868038 | 0.006088   | conserved  | conserved |
| PRIMPOL  | 0.65939552 | 0.01981851 | conserved  | conserved |
| PRKAA2   | 0.10503022 | 0.04410436 | conserved  | conserved |
| PRKAB1   | 0.07466792 | 0.07541612 | conserved  | conserved |
| PRKAB2   | 0.31220235 | 0.14040891 | conserved  | conserved |
| PRKACA   | 0.50672068 | 0.69038726 | conserved  | conserved |
| PRKACB   | 2.08069475 | 0.66636638 | conserved  | conserved |
| PRKAG1   | 0.66305675 | 0.4868488  | conserved  | conserved |
| PRKAG2   | 2.05840947 | 0.28050853 | conserved  | conserved |
| PRKAR2A  | 1.32842165 | 0.67451584 | conserved  | conserved |
| PRKAR2B  | 0.67623138 | 0.13597224 | conserved  | conserved |
| PRKCA    | 10.2920233 | 0.30342    | monkey-NSC | conserved |
| PRKCB    | 0.76709353 | 0.13973242 | conserved  | conserved |
| PRKCD    | 0.02178704 | 0.13379394 | conserved  | conserved |
| PRKCE    | 3.6672964  | 0.36727308 | conserved  | conserved |
| PRKCG    | 0.26313865 | 0.0178127  | conserved  | conserved |



|         |            |            |            |           |
|---------|------------|------------|------------|-----------|
| PRKCI   | 0.68453366 | 0.19905614 | conserved  | conserved |
| PRKCQ   | 3.02081141 | 0.00559822 | monkey-NSC | conserved |
| PRKD1   | 6.47497351 | 0.227286   | conserved  | conserved |
| PRKD2   | 0.24484746 | 0.10852792 | conserved  | conserved |
| PRKD3   | 0.44373917 | 0.72892833 | conserved  | conserved |
| PRKG1   | 38.1663481 | 0.07464746 | conserved  | conserved |
| PRLHR   | 0          | 0          | conserved  | conserved |
| PRM2    | 0          | 0          | conserved  | conserved |
| PRMT2   | 1.3307578  | 0.78494463 | conserved  | conserved |
| PRMT3   | 1.1342114  | 0.24443108 | conserved  | conserved |
| PRMT5   | 0.04715754 | 0.5368486  | conserved  | conserved |
| PRMT7   | 0.25673804 | 0.41434008 | conserved  | conserved |
| PRMT8   | 0.07187185 | 0.03556516 | conserved  | conserved |
| PRNP    | 0.54125073 | 3.69999671 | conserved  | conserved |
| PROCA1  | 0.30867174 | 0.30678818 | conserved  | conserved |
| PROCR   | 0.09588141 | 0          | conserved  | conserved |
| PRODH2  | 0.00257615 | 0          | conserved  | conserved |
| PROK1   | 0.01037117 | 0          | conserved  | conserved |
| PROK2   | 0.0006777  | 0          | conserved  | conserved |
| PROKR2  | 0.02497612 | 0.00676844 | conserved  | conserved |
| PROM1   | 0.05401899 | 0.57751775 | conserved  | conserved |
| PROP1   | 0.00118255 | 0          | conserved  | conserved |
| PROS1   | 0.20044878 | 0.04225071 | conserved  | conserved |
| PROSER1 | 0.12080549 | 0.50692151 | conserved  | conserved |
| PROSER2 | 0.03067788 | 0.00919572 | conserved  | conserved |
| PROX1   | 0.30989903 | 1.08540657 | mouse-RGL  | conserved |
| PROX2   | 0.00510617 | 0.00576906 | conserved  | conserved |
| PROZ    | 0.04669436 | 0          | conserved  | conserved |
| PRPF19  | 0.20327317 | 1.27662011 | conserved  | conserved |
| PRPF3   | 0.47162325 | 0.18041217 | conserved  | conserved |
| PRPF31  | 0.14240811 | 0.52014265 | conserved  | conserved |
| PRPF38A | 0.05941077 | 0.64707442 | conserved  | conserved |
| PRPF4   | 0.07961432 | 0.16862273 | conserved  | conserved |
| PRPF40A | 1.32609883 | 0.95415261 | conserved  | conserved |
| PRPF40B | 0.47106961 | 0.23289451 | conserved  | conserved |
| PRPF4B  | 1.4111974  | 1.02296554 | conserved  | conserved |
| PRPF6   | 0.86931035 | 0.27000377 | conserved  | conserved |
| PRPF8   | 0.579107   | 0.35576728 | conserved  | conserved |
| PRPSAP1 | 0.59839108 | 0.60806594 | conserved  | conserved |
| PRPSAP2 | 0.53572636 | 0.32521576 | conserved  | conserved |
| PRR11   | 0.08744814 | 0.01299768 | conserved  | conserved |

|        |            |            |            |                      |
|--------|------------|------------|------------|----------------------|
| PRR14  | 0.07633412 | 0.24681129 | conserved  | conserved            |
| PRR14L | 2.03596132 | 0.1824262  | conserved  | conserved            |
| PRR15  | 0.0020225  | 0          | conserved  | conserved            |
| PRR15L | 0.00192136 | 0          | conserved  | conserved            |
| PRR16  | 2.34472887 | 0.00467569 | monkey-NSC | monkey-NSC1-enriched |
| PRR19  | 0          | 0          | conserved  | conserved            |
| PRR27  | 0          | 0          | conserved  | conserved            |
| PRR29  | 0          | 0          | conserved  | conserved            |
| PRR3   | 0.28324835 | 0.56567393 | conserved  | conserved            |
| PRR5L  | 0.03189299 | 0.02013584 | conserved  | conserved            |
| PRRC1  | 0.18403527 | 0.23555077 | conserved  | conserved            |
| PRRC2A | 0.44550602 | 0.821644   | conserved  | conserved            |
| PRRC2B | 1.24490707 | 0.80600223 | conserved  | conserved            |
| PRRC2C | 2.07389543 | 0.94595548 | conserved  | conserved            |
| PRRG4  | 0.018246   | 0          | conserved  | conserved            |
| PRRT1  | 0.0930333  | 0.1978481  | conserved  | conserved            |
| PRRT2  | 0.06855935 | 0          | conserved  | conserved            |
| PRRT3  | 0.03685471 | 0.03121024 | conserved  | conserved            |
| PRSS12 | 0.32787216 | 0.01827125 | conserved  | conserved            |
| PRSS22 | 0.04503945 | 0          | conserved  | conserved            |
| PRSS33 | 0          | 0          | conserved  | conserved            |
| PRSS35 | 0.01071258 | 0.00897693 | conserved  | conserved            |
| PRSS36 | 0.00114212 | 0.23324384 | conserved  | conserved            |
| PRSS37 | 0.00156737 | 0          | conserved  | conserved            |
| PRSS48 | 0.06484552 | 0          | conserved  | conserved            |
| PRSS54 | 0.07203279 | 0          | conserved  | conserved            |
| PRSS55 | 0.7289636  | 0          | conserved  | conserved            |
| PRSS56 | 0.00244152 | 0.01930644 | conserved  | conserved            |
| PRSS58 | 0          | 0          | conserved  | conserved            |
| PRTG   | 0.20453509 | 0.02391203 | conserved  | conserved            |
| PRUNE2 | 0.75377767 | 0.04537444 | conserved  | conserved            |
| PRX    | 0.02095239 | 0.00515469 | conserved  | conserved            |
| PSAP   | 1.76124987 | 4.19171004 | monkey-NSC | conserved            |
| PSD    | 0.273942   | 0.14673001 | conserved  | conserved            |
| PSD2   | 2.76260297 | 0.19689637 | monkey-NSC | conserved            |
| PSD4   | 0.02520141 | 0          | conserved  | conserved            |
| PSEN1  | 1.05490155 | 0.25488536 | conserved  | conserved            |
| PSIP1  | 1.04484599 | 2.90765834 | mouse-RGL  | conserved            |
| PSKH1  | 0.35150972 | 0.14034843 | conserved  | conserved            |
| PSMA2  | 0.12138954 | 2.02853281 | mouse-RGL  | conserved            |
| PSMA4  | 0.19151639 | 2.99955944 | mouse-RGL  | conserved            |

|          |            |            |           |           |
|----------|------------|------------|-----------|-----------|
| PSMA5    | 0.23540508 | 1.83191962 | mouse-RGL | conserved |
| PSMA7    | 0.31481557 | 3.95176415 | mouse-RGL | conserved |
| PSMA8    | 0.02703767 | 0          | conserved | conserved |
| PSMB11   | 0          | 0          | conserved | conserved |
| PSMB2    | 0.23775759 | 3.33736969 | mouse-RGL | conserved |
| PSMB3    | 0.17085499 | 2.45901745 | mouse-RGL | conserved |
| PSMB4    | 0.04085987 | 1.71047784 | mouse-RGL | conserved |
| PSMB5    | 0.16704312 | 1.97309954 | mouse-RGL | conserved |
| PSMB6    | 0.08446923 | 4.27132103 | mouse-RGL | conserved |
| PSMB9    | 0.02227125 | 0.02145865 | conserved | conserved |
| PSMC2    | 0.33365394 | 0.55674299 | conserved | conserved |
| PSMC3    | 0.0727293  | 1.25473244 | conserved | conserved |
| PSMC3IP  | 0.0278402  | 0.34593905 | conserved | conserved |
| PSMC4    | 0.09467552 | 1.14930252 | mouse-RGL | conserved |
| PSMC5    | 0.1127328  | 1.23694314 | conserved | conserved |
| PSMD1    | 1.56867529 | 0.87713587 | conserved | conserved |
| PSMD11   | 0.26206266 | 1.25578202 | conserved | conserved |
| PSMD12   | 0.28014183 | 0.57608761 | conserved | conserved |
| PSMD13   | 0.31785356 | 0.86193404 | conserved | conserved |
| PSMD14   | 1.24362729 | 1.25239448 | conserved | conserved |
| PSMD2    | 0.18953121 | 0.79890819 | conserved | conserved |
| PSMD3    | 0.31399608 | 0.63359345 | conserved | conserved |
| PSMD4    | 0.33609323 | 1.41256718 | conserved | conserved |
| PSMD5    | 0.3914172  | 0.35669601 | conserved | conserved |
| PSMD6    | 0.0760428  | 0.72589658 | conserved | conserved |
| PSMD7    | 0.34994022 | 1.56355763 | conserved | conserved |
| PSMD8    | 0.21162461 | 1.72065278 | mouse-RGL | conserved |
| PSME1    | 0.0740283  | 0.94483638 | mouse-RGL | conserved |
| PSME3    | 0.12950787 | 0.51842885 | conserved | conserved |
| PSME4    | 2.24468005 | 0.40065849 | conserved | conserved |
| PSMF1    | 0.66408807 | 0.34982951 | conserved | conserved |
| PSMG3    | 0.03714625 | 0.48857909 | conserved | conserved |
| PSMG4    | 0.44081479 | 1.70115109 | conserved | conserved |
| PSORS1C2 | 0.00058825 | 0.01630608 | conserved | conserved |
| PSPC1    | 1.84131721 | 0.54363438 | conserved | conserved |
| PSRC1    | 0.05540061 | 0.01369223 | conserved | conserved |
| PSTK     | 0.04155455 | 0.29151344 | conserved | conserved |
| PSTPIP1  | 0.01785871 | 0.02980197 | conserved | conserved |
| PSTPIP2  | 0.0555666  | 0          | conserved | conserved |
| PTAFR    | 0.0089091  | 0          | conserved | conserved |
| PTAR1    | 0.82147279 | 0.02984336 | conserved | conserved |

|        |            |            |            |           |
|--------|------------|------------|------------|-----------|
| PTBP2  | 3.21258521 | 0.62794171 | conserved  | conserved |
| PTBP3  | 0.45949747 | 0.22300249 | conserved  | conserved |
| PTCD2  | 0.22410821 | 0.22418907 | conserved  | conserved |
| PTCD3  | 0.48417866 | 0.11423971 | conserved  | conserved |
| PTCH1  | 3.30991693 | 0.90131257 | conserved  | conserved |
| PTCHD1 | 0.20595067 | 0          | conserved  | conserved |
| PTCHD3 | 0.00278974 | 0          | conserved  | conserved |
| PTCHD4 | 0.23174679 | 0.04658353 | conserved  | conserved |
| PTDSS1 | 0.28398293 | 0.34912321 | conserved  | conserved |
| PTER   | 0.06204158 | 0.38579721 | conserved  | conserved |
| PTGDR  | 0          | 0          | conserved  | conserved |
| PTGER3 | 0.10241431 | 0          | conserved  | conserved |
| PTGER4 | 0.00618575 | 0          | conserved  | conserved |
| PTGES  | 0.00411023 | 0.12057601 | conserved  | conserved |
| PTGES3 | 0.86921469 | 2.18809539 | mouse-RGL  | conserved |
| PTGFR  | 0.18627926 | 0          | conserved  | conserved |
| PTGFRN | 0.45087787 | 0.6011551  | conserved  | conserved |
| PTGIS  | 0.00987662 | 0.01400781 | conserved  | conserved |
| PTGS1  | 0.01642451 | 0          | conserved  | conserved |
| PTGS2  | 0          | 0          | conserved  | conserved |
| PTH1R  | 0.26336094 | 0.03910391 | conserved  | conserved |
| PTH2R  | 0.02015146 | 0          | conserved  | conserved |
| PTHLH  | 0.0197377  | 0.07892138 | conserved  | conserved |
| PTK2   | 7.01222244 | 0.35059428 | conserved  | conserved |
| PTK2B  | 0.73876452 | 0.03223302 | conserved  | conserved |
| PTK7   | 0.29810386 | 0.19448772 | conserved  | conserved |
| PTN    | 2.74732935 | 28.7309362 | conserved  | conserved |
| PTP4A2 | 0.71838385 | 1.9286645  | conserved  | conserved |
| PTPDC1 | 0.34514142 | 0.1527995  | conserved  | conserved |
| PTPN1  | 0.80795523 | 0.44883009 | conserved  | conserved |
| PTPN12 | 1.05413985 | 0.37644511 | conserved  | conserved |
| PTPN14 | 0.98396094 | 0.00507983 | conserved  | conserved |
| PTPN18 | 0.07272713 | 0.01563896 | conserved  | conserved |
| PTPN20 | 0.01832996 | 0          | conserved  | conserved |
| PTPN22 | 0.10104774 | 0.01087137 | conserved  | conserved |
| PTPN3  | 0.82895643 | 0.01336544 | conserved  | conserved |
| PTPN4  | 2.88349705 | 0.3930311  | monkey-NSC | conserved |
| PTPN5  | 0.21367119 | 0.04328788 | conserved  | conserved |
| PTPN6  | 0.05787259 | 0.0094372  | conserved  | conserved |
| PTPN7  | 0.03579775 | 0          | conserved  | conserved |
| PTPN9  | 1.85327129 | 0.24504151 | monkey-NSC | conserved |

|         |            |            |           |           |
|---------|------------|------------|-----------|-----------|
| PTPRA   | 4.16851889 | 1.43943155 | conserved | conserved |
| PTPRB   | 0.25304956 | 0.01611425 | conserved | conserved |
| PTPRC   | 0.03802872 | 0          | conserved | conserved |
| PTPRD   | 9.09283259 | 0.36850334 | conserved | conserved |
| PTPRJ   | 0.65371063 | 0.07331153 | conserved | conserved |
| PTPRK   | 2.21217644 | 0.03789946 | conserved | conserved |
| PTPRM   | 4.4947895  | 0.07248709 | conserved | conserved |
| PTPRN   | 0.25787974 | 0.05514506 | conserved | conserved |
| PTPRO   | 0.86001545 | 0.05802311 | conserved | conserved |
| PTPRQ   | 0.19128261 | 0          | conserved | conserved |
| PTPRR   | 0.86913987 | 0          | conserved | conserved |
| PTPRT   | 0.42577957 | 0.1176252  | conserved | conserved |
| PTPRU   | 0.06694847 | 0.03300874 | conserved | conserved |
| PTPRZ1  | 13.4507786 | 16.6047569 | conserved | conserved |
| PTRH1   | 0.04647638 | 0.08000453 | conserved | conserved |
| PTRH2   | 0.08803698 | 0.38807205 | conserved | conserved |
| PTRHD1  | 0.00645854 | 0.54777513 | conserved | conserved |
| PTS     | 0.16440372 | 1.09518836 | conserved | conserved |
| PTTG1   | 0.00787955 | 0.1799151  | conserved | conserved |
| PTTG1IP | 0.43107507 | 0.9143965  | conserved | conserved |
| PTX4    | 0.04209781 | 0.00267113 | conserved | conserved |
| PUF60   | 0.30932895 | 1.3476777  | mouse-RGL | conserved |
| PUM1    | 2.48676345 | 1.37821923 | conserved | conserved |
| PUM2    | 1.22281147 | 0.96425113 | conserved | conserved |
| PUM3    | 0.29242107 | 0.22386992 | conserved | conserved |
| PURB    | 0.0440967  | 1.21276005 | conserved | conserved |
| PURG    | 1.06856542 | 0.19339487 | conserved | conserved |
| PUS1    | 0.12917741 | 0.13559408 | conserved | conserved |
| PUS10   | 1.26110877 | 0.09009448 | conserved | conserved |
| PUS3    | 0.12437238 | 0.17299671 | conserved | conserved |
| PUS7    | 0.40376865 | 0.2033352  | conserved | conserved |
| PUS7L   | 0.39736033 | 0.03679631 | conserved | conserved |
| PVALB   | 0.00411283 | 0          | conserved | conserved |
| PWWP2A  | 0.67726615 | 0.35379274 | conserved | conserved |
| PXDC1   | 0.09482758 | 0.07950813 | conserved | conserved |
| PXK     | 1.1776389  | 0.09658849 | conserved | conserved |
| PXMP2   | 0.13613765 | 0.22463661 | conserved | conserved |
| PXN     | 0.33930727 | 0.25739664 | conserved | conserved |
| PXYLP1  | 0.1036949  | 0.07149411 | conserved | conserved |
| PYCARD  | 0.0008293  | 0.59819158 | conserved | conserved |
| PYCR1   | 0.06543457 | 0.09305232 | conserved | conserved |

|           |            |            |            |           |
|-----------|------------|------------|------------|-----------|
| PYGB      | 1.19880716 | 1.80892948 | conserved  | conserved |
| PYGL      | 0.07397728 | 0.06210301 | conserved  | conserved |
| PYGM      | 0.46314977 | 0.00309797 | conserved  | conserved |
| PYGO2     | 0.04593819 | 0.21371156 | conserved  | conserved |
| PYROXD1   | 0.14592358 | 0.18299416 | conserved  | conserved |
| QDPR      | 0.66167896 | 0.79060268 | conserved  | conserved |
| QPCT      | 0.03396315 | 0.0262498  | conserved  | conserved |
| QPCTL     | 0.07170779 | 0.20659103 | conserved  | conserved |
| QRICH1    | 1.19623206 | 0.48816136 | conserved  | conserved |
| QSER1     | 0.48105083 | 0.30756345 | conserved  | conserved |
| QSOX2     | 0.1516134  | 0.09426721 | conserved  | conserved |
| QTRT1     | 0.11702869 | 0.23926083 | conserved  | conserved |
| R3HCC1    | 0.04016961 | 0.21792528 | conserved  | conserved |
| R3HCC1L   | 0.44014507 | 0.07706315 | conserved  | conserved |
| R3HDM1    | 2.93854954 | 1.09711249 | conserved  | conserved |
| R3HDM2    | 3.21455893 | 0.36947312 | conserved  | conserved |
| R3HDM4    | 0.0382697  | 0.77960178 | mouse-RGL  | conserved |
| R3HDML    | 0.00325788 | 0          | conserved  | conserved |
| RAB10     | 2.02733765 | 2.84425105 | conserved  | conserved |
| RAB11FIP2 | 2.09643766 | 1.46584251 | conserved  | conserved |
| RAB11FIP3 | 1.31468347 | 0.05571488 | conserved  | conserved |
| RAB11FIP4 | 0.74390179 | 0.20520497 | conserved  | conserved |
| RAB14     | 0.48874099 | 3.08606988 | mouse-RGL  | conserved |
| RAB15     | 0.21231102 | 0.01480757 | conserved  | conserved |
| RAB17     | 0.00152506 | 0.0037771  | conserved  | conserved |
| RAB18     | 0.7739873  | 2.30924641 | conserved  | conserved |
| RAB19     | 0.01116491 | 0          | conserved  | conserved |
| RAB1B     | 0.02435099 | 0.55397157 | conserved  | conserved |
| RAB21     | 0.58381479 | 0.14039881 | conserved  | conserved |
| RAB22A    | 0.34148142 | 0.55516934 | conserved  | conserved |
| RAB24     | 0.23239641 | 1.54542274 | mouse-RGL  | conserved |
| RAB25     | 0.0077739  | 0          | conserved  | conserved |
| RAB26     | 0.20198343 | 0.02007903 | conserved  | conserved |
| RAB27A    | 0.31430899 | 0.00945927 | conserved  | conserved |
| RAB27B    | 0.18498323 | 0.02492601 | conserved  | conserved |
| RAB28     | 1.32182507 | 1.07065712 | conserved  | conserved |
| RAB2A     | 2.87980268 | 2.35371708 | conserved  | conserved |
| RAB2B     | 0.21791477 | 0.24573054 | conserved  | conserved |
| RAB30     | 2.3447139  | 0.16374627 | monkey-NSC | conserved |
| RAB33A    | 0.01443087 | 0.07867125 | conserved  | conserved |
| RAB33B    | 0.10699309 | 0.46238526 | conserved  | conserved |

|          |            |            |            |           |
|----------|------------|------------|------------|-----------|
| RAB34    | 0.41907668 | 1.10252362 | conserved  | conserved |
| RAB35    | 0.17934535 | 0.26147146 | conserved  | conserved |
| RAB36    | 0.1352041  | 0.24940864 | conserved  | conserved |
| RAB37    | 0.03352601 | 0.01714038 | conserved  | conserved |
| RAB38    | 0.06842677 | 0.01682669 | conserved  | conserved |
| RAB39B   | 0.0389841  | 0.22499812 | conserved  | conserved |
| RAB3B    | 0.01524539 | 0.03214802 | conserved  | conserved |
| RAB3C    | 0.5867133  | 0.03896557 | conserved  | conserved |
| RAB3D    | 0.16951647 | 0.08564127 | conserved  | conserved |
| RAB3GAP1 | 1.16969791 | 0.19099006 | conserved  | conserved |
| RAB3GAP2 | 1.57465262 | 0.1950549  | conserved  | conserved |
| RAB3IL1  | 0.01932657 | 0.04875633 | conserved  | conserved |
| RAB40C   | 0.43235756 | 0.13630038 | conserved  | conserved |
| RAB44    | 0          | 0          | conserved  | conserved |
| RAB5A    | 1.04241    | 1.93166163 | conserved  | conserved |
| RAB5C    | 1.71808867 | 1.45500885 | conserved  | conserved |
| RAB6A    | 2.59725692 | 1.47251064 | conserved  | conserved |
| RAB6B    | 0.74410471 | 0.53479295 | conserved  | conserved |
| RAB7B    | 0.00423234 | 0.05140291 | conserved  | conserved |
| RAB8A    | 0.10841682 | 0.50607809 | conserved  | conserved |
| RAB8B    | 0.71399167 | 0.19845199 | conserved  | conserved |
| RAB9B    | 0.08109944 | 0.01233413 | conserved  | conserved |
| RABAC1   | 0.13079105 | 1.52344754 | conserved  | conserved |
| RABEP2   | 0.16292993 | 0.12549699 | conserved  | conserved |
| RABEPK   | 0.38980552 | 0.23683082 | conserved  | conserved |
| RABGAP1  | 3.6410284  | 0.36236892 | conserved  | conserved |
| RABGAP1L | 4.38707192 | 0.26580431 | monkey-NSC | conserved |
| RABGGTA  | 0.03814786 | 0.24385036 | conserved  | conserved |
| RABIF    | 0.07030955 | 0.41893427 | conserved  | conserved |
| RABL3    | 0.11573865 | 0.11432261 | conserved  | conserved |
| RAC2     | 0          | 0.00409477 | conserved  | conserved |
| RAC3     | 0.04490741 | 0.85406122 | conserved  | conserved |
| RAD1     | 0.05587193 | 0.21442208 | conserved  | conserved |
| RAD17    | 0.60608651 | 0.29379314 | conserved  | conserved |
| RAD18    | 0.12803288 | 0.07192501 | conserved  | conserved |
| RAD21    | 0.58671589 | 0.72256191 | conserved  | conserved |
| RAD23A   | 0.31801515 | 0.3282883  | conserved  | conserved |
| RAD23B   | 0.60766765 | 1.34819603 | conserved  | conserved |
| RAD51B   | 0.73600077 | 0.00346455 | conserved  | conserved |
| RAD51C   | 0.34158724 | 0.03655849 | conserved  | conserved |
| RAD52    | 0.60532631 | 0.17146575 | conserved  | conserved |

|          |            |            |            |           |
|----------|------------|------------|------------|-----------|
| RAD54L   | 0.04136277 | 0.08654973 | conserved  | conserved |
| RAD9A    | 0.16321895 | 0.09997437 | conserved  | conserved |
| RAD9B    | 0.14280317 | 0.12538093 | conserved  | conserved |
| RAE1     | 0.16200657 | 0.61689383 | conserved  | conserved |
| RAF1     | 1.39888788 | 0.74064018 | conserved  | conserved |
| RAG1     | 0.03443815 | 0          | conserved  | conserved |
| RAG2     | 0          | 0          | conserved  | conserved |
| RAI1     | 0.73186385 | 0.19507689 | conserved  | conserved |
| RAI14    | 3.00965702 | 0.0225259  | monkey-NSC | conserved |
| RALA     | 0.45902077 | 1.37535971 | mouse-RGL  | conserved |
| RALB     | 0.13046128 | 0.24538892 | conserved  | conserved |
| RALGAPA1 | 3.84467407 | 0.25064892 | conserved  | conserved |
| RALGAPA2 | 7.24931777 | 0.17123995 | monkey-NSC | conserved |
| RALGAPB  | 1.25926883 | 0.21223383 | conserved  | conserved |
| RALGPS1  | 2.14216152 | 0.39833395 | monkey-NSC | conserved |
| RALGPS2  | 0.7133184  | 0.5085669  | conserved  | conserved |
| RALY     | 0.19009196 | 1.59170813 | mouse-RGL  | conserved |
| RALYL    | 0.46639921 | 0.09990211 | conserved  | conserved |
| RAMP1    | 1.92017941 | 1.81466755 | conserved  | conserved |
| RAMP2    | 0.00666978 | 0.85206599 | conserved  | conserved |
| RAMP3    | 0.03950485 | 0.00146763 | conserved  | conserved |
| RANBP1   | 0.09564854 | 5.39972127 | mouse-RGL  | conserved |
| RANBP10  | 0.67579173 | 0.04354641 | conserved  | conserved |
| RANBP17  | 0.30466183 | 0.02319765 | conserved  | conserved |
| RANBP2   | 1.19005823 | 0.24901875 | conserved  | conserved |
| RANBP3   | 0.45977873 | 0.29766734 | conserved  | conserved |
| RANBP9   | 1.23856736 | 0.30975691 | monkey-NSC | conserved |
| RANGAP1  | 0.26311588 | 0.25964335 | conserved  | conserved |
| RANGRF   | 0.01213341 | 0.65289639 | conserved  | conserved |
| RAP1A    | 0.67259059 | 1.71294339 | conserved  | conserved |
| RAP1GAP  | 0.37770517 | 0.23090208 | conserved  | conserved |
| RAP1GAP2 | 0.35433076 | 0.02869358 | conserved  | conserved |
| RAP1GDS1 | 0.96969659 | 0.38928667 | conserved  | conserved |
| RAP2B    | 0.00350465 | 0.4735476  | conserved  | conserved |
| RAP2C    | 0.09743606 | 0.31308581 | conserved  | conserved |
| RAPGEF1  | 1.26616297 | 0.25335775 | conserved  | conserved |
| RAPGEF2  | 3.73627744 | 0.25255279 | conserved  | conserved |
| RAPGEF3  | 0.92387488 | 0.03989003 | conserved  | conserved |
| RAPGEF4  | 2.05609239 | 0.09624311 | conserved  | conserved |
| RAPGEF5  | 2.5505445  | 0.00329745 | monkey-NSC | conserved |
| RAPGEFL1 | 0.27204204 | 0.04637499 | conserved  | conserved |



|          |            |            |            |           |
|----------|------------|------------|------------|-----------|
| RAPSN    | 0.03514529 | 0.00914273 | conserved  | conserved |
| RARA     | 0.04024793 | 0.02932162 | conserved  | conserved |
| RARB     | 1.12120845 | 0.01762882 | monkey-NSC | conserved |
| RARG     | 0.15455305 | 0.06520342 | conserved  | conserved |
| RARRES1  | 0.11426054 | 0.00511579 | conserved  | conserved |
| RARS2    | 0.45020405 | 0.15080331 | conserved  | conserved |
| RASA1    | 2.39280385 | 0.56161331 | conserved  | conserved |
| RASA3    | 0.23873274 | 0.47870978 | conserved  | conserved |
| RASAL1   | 0.09970255 | 0          | conserved  | conserved |
| RASAL2   | 2.05682075 | 0.30927689 | conserved  | conserved |
| RASD1    | 0.03061555 | 0.03484718 | conserved  | conserved |
| RASGEF1A | 0.19812502 | 0.03485819 | conserved  | conserved |
| RASGEF1B | 0.23852389 | 0.04376334 | conserved  | conserved |
| RASGRF2  | 0.89619689 | 0.01010794 | conserved  | conserved |
| RASGRP1  | 0.51305555 | 0.18967391 | conserved  | conserved |
| RASGRP2  | 0.16209822 | 0.14461683 | conserved  | conserved |
| RASGRP3  | 0.1161342  | 0.01021083 | conserved  | conserved |
| RASGRP4  | 0.0160908  | 0.00416509 | conserved  | conserved |
| RASL10A  | 0.18801444 | 0.04200465 | conserved  | conserved |
| RASL10B  | 0.07921826 | 0.08930087 | conserved  | conserved |
| RASL11B  | 0.01775595 | 0.06190541 | conserved  | conserved |
| RASL12   | 0.42518454 | 0.08083386 | conserved  | conserved |
| RASSF1   | 0.26284733 | 0.45608002 | conserved  | conserved |
| RASSF2   | 0.13065503 | 0.50321926 | conserved  | conserved |
| RASSF3   | 0.16688166 | 0.02381805 | conserved  | conserved |
| RASSF4   | 0.91810502 | 0.11633531 | conserved  | conserved |
| RASSF5   | 0.06476064 | 0.00169459 | conserved  | conserved |
| RASSF6   | 0.00260509 | 0          | conserved  | conserved |
| RASSF7   | 0.08878439 | 0.03186764 | conserved  | conserved |
| RASSF8   | 0.51071439 | 0.10750455 | conserved  | conserved |
| RASSF9   | 0.00384151 | 0          | conserved  | conserved |
| RAVER2   | 1.46335943 | 0.15667883 | conserved  | conserved |
| RB1      | 1.41066776 | 0.48937085 | conserved  | conserved |
| RB1CC1   | 1.79143165 | 0.50065192 | conserved  | conserved |
| RBAK     | 0.65250234 | 0.08256478 | conserved  | conserved |
| RBBP5    | 0.21872242 | 0.1216438  | conserved  | conserved |
| RBBP6    | 1.0204845  | 1.65708864 | conserved  | conserved |
| RBBP7    | 0.35289597 | 1.12509631 | conserved  | conserved |
| RBBP8    | 0.06611944 | 0.10631849 | conserved  | conserved |
| RBBP9    | 0.05170371 | 0.50973998 | conserved  | conserved |
| RBCK1    | 0.35975964 | 0.54309076 | conserved  | conserved |

|        |            |            |            |           |
|--------|------------|------------|------------|-----------|
| RBFOX1 | 29.3694299 | 0.15279649 | monkey-NSC | conserved |
| RBFOX2 | 4.72974332 | 0.30402598 | conserved  | conserved |
| RBFOX3 | 0.38458901 | 0.15857543 | conserved  | conserved |
| RBKS   | 0.51832931 | 0.01607209 | conserved  | conserved |
| RBL1   | 0.54247148 | 0.05020416 | conserved  | conserved |
| RBL2   | 0.93039547 | 0.19269891 | conserved  | conserved |
| RBM10  | 0.33258633 | 0.31200053 | conserved  | conserved |
| RBM11  | 0.04127813 | 0.01452139 | conserved  | conserved |
| RBM15  | 0.08083887 | 0.2378476  | conserved  | conserved |
| RBM17  | 0.53641554 | 1.06378514 | conserved  | conserved |
| RBM18  | 0.11749903 | 0.64637741 | conserved  | conserved |
| RBM19  | 0.22911092 | 0.08051947 | conserved  | conserved |
| RBM20  | 0.10874873 | 0.27561362 | conserved  | conserved |
| RBM22  | 0.16461231 | 0.44576664 | conserved  | conserved |
| RBM24  | 0.0877859  | 0.17244758 | conserved  | conserved |
| RBM25  | 2.42527448 | 2.67639453 | conserved  | conserved |
| RBM26  | 1.69852073 | 0.52157815 | conserved  | conserved |
| RBM28  | 0.39038967 | 0.32817129 | conserved  | conserved |
| RBM33  | 1.59900566 | 0.17112527 | conserved  | conserved |
| RBM38  | 0.11995662 | 0.17831054 | conserved  | conserved |
| RBM41  | 1.27792819 | 0.0430978  | conserved  | conserved |
| RBM42  | 0.08263764 | 0.66582685 | conserved  | conserved |
| RBM43  | 0.08658687 | 0.07918201 | conserved  | conserved |
| RBM44  | 0.07386005 | 0.00269126 | conserved  | conserved |
| RBM45  | 0.26662466 | 0.10285268 | conserved  | conserved |
| RBM46  | 0.00353668 | 0.14413726 | conserved  | conserved |
| RBM48  | 0.08691969 | 0.16570903 | conserved  | conserved |
| RBM5   | 2.74615752 | 1.20925459 | conserved  | conserved |
| RBMS1  | 0.1588624  | 0.03924323 | conserved  | conserved |
| RBMS2  | 0.36141573 | 0.22519806 | conserved  | conserved |
| RBMS3  | 0.56020657 | 0.17231715 | conserved  | conserved |
| RBP1   | 0.03432042 | 0.14151858 | conserved  | conserved |
| RBP3   | 0.00096898 | 0          | conserved  | conserved |
| RBP4   | 0.07922852 | 0.42660706 | conserved  | conserved |
| RBP7   | 0.00885567 | 0.00325734 | conserved  | conserved |
| RBPJ   | 1.69096227 | 0.51149953 | conserved  | conserved |
| RBPJL  | 0.01894647 | 0.03428601 | conserved  | conserved |
| RPMS2  | 0.13862043 | 0.03212683 | conserved  | conserved |
| RBSN   | 0.34867946 | 0.24198754 | conserved  | conserved |
| RC3H1  | 1.24386669 | 0.35182311 | conserved  | conserved |
| RC3H2  | 0.74291118 | 0.51418266 | conserved  | conserved |

|        |            |            |            |           |
|--------|------------|------------|------------|-----------|
| RCAN1  | 0.30869588 | 0.19617937 | conserved  | conserved |
| RCAN3  | 0.06346161 | 0.15028978 | conserved  | conserved |
| RCBTB1 | 0.25527864 | 0.2584742  | conserved  | conserved |
| RCBTB2 | 0.31002887 | 0.59956227 | conserved  | conserved |
| RCC2   | 0.20533341 | 0.55801767 | conserved  | conserved |
| RCCD1  | 0.09869888 | 0.28396362 | conserved  | conserved |
| RCE1   | 0.07228588 | 0.13257006 | conserved  | conserved |
| RCHY1  | 1.26661238 | 1.09760508 | conserved  | conserved |
| RCN2   | 0.46484487 | 3.11591285 | conserved  | conserved |
| RCOR1  | 0.76245947 | 0.17258503 | conserved  | conserved |
| RCOR2  | 0.01796127 | 0.12834341 | conserved  | conserved |
| RCOR3  | 1.44028798 | 0.20718273 | monkey-NSC | conserved |
| RCSD1  | 0.05631363 | 0.00325899 | conserved  | conserved |
| RD3L   | 0          | 0          | conserved  | conserved |
| RDH10  | 0.07306185 | 0.23643957 | conserved  | conserved |
| RDH11  | 0.14850389 | 0.238706   | conserved  | conserved |
| RDH12  | 0.00525359 | 0          | conserved  | conserved |
| RDH8   | 0.00786556 | 0          | conserved  | conserved |
| RDM1   | 0.00434462 | 0.27692159 | conserved  | conserved |
| RDX    | 1.23068888 | 1.74462928 | conserved  | conserved |
| REC114 | 0.02466751 | 0          | conserved  | conserved |
| REC8   | 0.00192282 | 0.00474123 | conserved  | conserved |
| RECK   | 0.86954415 | 0.02458747 | conserved  | conserved |
| RECQL  | 0.12297117 | 0.09907957 | conserved  | conserved |
| RECQL5 | 0.25754683 | 0.11147088 | conserved  | conserved |
| REEP1  | 0.30567862 | 0.1484849  | conserved  | conserved |
| REEP2  | 0.35313376 | 0.18574192 | conserved  | conserved |
| REEP3  | 1.58889865 | 1.99922007 | conserved  | conserved |
| REEP4  | 0.0041088  | 0.04345255 | conserved  | conserved |
| REEP5  | 0.76419286 | 2.53662203 | conserved  | conserved |
| REG4   | 0.00270095 | 0          | conserved  | conserved |
| REL    | 0.17453523 | 0.00781125 | conserved  | conserved |
| RELA   | 0.16162861 | 0.27733922 | conserved  | conserved |
| RELB   | 0.12000824 | 0.03327277 | conserved  | conserved |
| RELL1  | 0.03848892 | 0.30172925 | conserved  | conserved |
| RELL2  | 0.03228552 | 0.0349072  | conserved  | conserved |
| RELN   | 0.63532827 | 0.09196815 | conserved  | conserved |
| RELT   | 0.04770061 | 0.0180532  | conserved  | conserved |
| RENBP  | 0.09621511 | 0.08591852 | conserved  | conserved |
| REPS2  | 0.59592896 | 0.02704533 | conserved  | conserved |
| RER1   | 0.32656579 | 1.24663764 | conserved  | conserved |

|        |            |            |            |           |
|--------|------------|------------|------------|-----------|
| REG    | 1.02830155 | 0.07920856 | conserved  | conserved |
| REGL   | 0.00092183 | 0          | conserved  | conserved |
| REST   | 0.34408563 | 0.5986444  | conserved  | conserved |
| RET    | 0.00312454 | 0          | conserved  | conserved |
| RETSAT | 0.21763273 | 0.04413166 | conserved  | conserved |
| REV1   | 1.27959076 | 0.26207924 | conserved  | conserved |
| REV3L  | 7.41205875 | 0.34333844 | conserved  | conserved |
| REXO2  | 0.12317861 | 1.44204782 | mouse-RGL  | conserved |
| REXO4  | 0.31753595 | 0.30205779 | conserved  | conserved |
| RFC2   | 0.092706   | 0.87754167 | conserved  | conserved |
| RFC3   | 0.06933143 | 0.33074706 | conserved  | conserved |
| RFC4   | 0.07526046 | 0.19361617 | conserved  | conserved |
| RFC5   | 0.07614228 | 0.17097832 | conserved  | conserved |
| RFESD  | 0.09235157 | 0.10992625 | conserved  | conserved |
| RFNG   | 0.07414062 | 0.39590106 | conserved  | conserved |
| RFTN1  | 0.21209561 | 0.01967095 | conserved  | conserved |
| RFTN2  | 4.10845028 | 1.06023303 | conserved  | conserved |
| RFWD3  | 0.25968766 | 0.10411612 | conserved  | conserved |
| RFX2   | 2.04935637 | 0.05708985 | monkey-NSC | conserved |
| RFX3   | 4.93408125 | 0.59900988 | conserved  | conserved |
| RFX6   | 0.00173474 | 0          | conserved  | conserved |
| RFX7   | 2.66270793 | 0.43041056 | conserved  | conserved |
| RFX8   | 0.01673122 | 0          | conserved  | conserved |
| RFXANK | 0.15358604 | 0.31522513 | conserved  | conserved |
| RFXAP  | 0.21071896 | 0.35703063 | conserved  | conserved |
| RGCC   | 2.33848268 | 1.22463369 | monkey-NSC | conserved |
| RGL1   | 3.04228036 | 0.10165786 | conserved  | conserved |
| RGL2   | 0.6618235  | 0.39857093 | conserved  | conserved |
| RGMA   | 2.55132845 | 1.6092565  | monkey-NSC | conserved |
| RGMB   | 0.29085032 | 0.1670085  | conserved  | conserved |
| RGN    | 0.31663081 | 0.00532622 | conserved  | conserved |
| RGR    | 0.12225395 | 0.00146763 | conserved  | conserved |
| RGS1   | 0.00080921 | 0          | conserved  | conserved |
| RGS10  | 0.02988608 | 0.04143037 | conserved  | conserved |
| RGS11  | 0.11517745 | 0.0651177  | conserved  | conserved |
| RGS12  | 1.70070193 | 0.21801468 | conserved  | conserved |
| RGS13  | 0.00383028 | 0.00707395 | conserved  | conserved |
| RGS14  | 0.09371929 | 0          | conserved  | conserved |
| RGS16  | 0.03231621 | 0.05854549 | conserved  | conserved |
| RGS17  | 0.22635028 | 0.1541908  | conserved  | conserved |
| RGS18  | 0.01684449 | 0          | conserved  | conserved |

|         |            |            |            |           |
|---------|------------|------------|------------|-----------|
| RGS19   | 0.01517276 | 0.21739966 | conserved  | conserved |
| RGS2    | 0.01517646 | 0.11935086 | conserved  | conserved |
| RGS20   | 9.71566612 | 1.59195046 | monkey-NSC | conserved |
| RGS22   | 0.74695772 | 0.00178496 | conserved  | conserved |
| RGS3    | 0.23420844 | 0.18719945 | conserved  | conserved |
| RGS4    | 0.06817563 | 0.06944885 | conserved  | conserved |
| RGS5    | 0.10160208 | 1.00908584 | mouse-RGL  | conserved |
| RGS6    | 1.36744537 | 0.04904429 | conserved  | conserved |
| RGS7    | 12.8007345 | 0.07177312 | monkey-NSC | conserved |
| RGS7BP  | 0.41980864 | 0.16842936 | conserved  | conserved |
| RGS8    | 0.07300046 | 0.01208745 | conserved  | conserved |
| RGS9    | 1.02222631 | 0.05344123 | conserved  | conserved |
| RHAG    | 0.01177573 | 0          | conserved  | conserved |
| RHBDD1  | 0.67847178 | 0.11962791 | conserved  | conserved |
| RHBDD2  | 0.24745316 | 0.3579086  | conserved  | conserved |
| RHBDD3  | 0.21551809 | 0.09964143 | conserved  | conserved |
| RHBDF2  | 0.01230867 | 0.00359136 | conserved  | conserved |
| RHBDL1  | 0.19341076 | 0          | conserved  | conserved |
| RHBDL2  | 0.82877388 | 0.06672219 | conserved  | conserved |
| RHBDL3  | 0.31091276 | 0.10229301 | conserved  | conserved |
| RHCG    | 0.09745083 | 0.54466608 | conserved  | conserved |
| RHEBL1  | 0.02019557 | 0.07255989 | conserved  | conserved |
| RHNO1   | 0.13382229 | 0.32618582 | conserved  | conserved |
| RHOBTB2 | 0.22150869 | 0.27257264 | conserved  | conserved |
| RHOBTB3 | 2.62647365 | 0.15481632 | monkey-NSC | conserved |
| RHOD    | 0.01304388 | 0.02433963 | conserved  | conserved |
| RHOF    | 0.01364942 | 0.04291911 | conserved  | conserved |
| RHOG    | 0.03325019 | 0.13315482 | conserved  | conserved |
| RHOJ    | 0.40786983 | 0.12214452 | conserved  | conserved |
| RHOQ    | 1.27327343 | 0.43762415 | conserved  | conserved |
| RHOT1   | 1.39630059 | 0.45627242 | conserved  | conserved |
| RHOU    | 0.24209038 | 0.06307011 | conserved  | conserved |
| RHOV    | 0.00820648 | 0.0087233  | conserved  | conserved |
| RHPN1   | 0.50045792 | 0.12615098 | conserved  | conserved |
| RHPN2   | 1.91744733 | 0.01917716 | monkey-NSC | conserved |
| RIBC1   | 0.0172556  | 0.00416318 | conserved  | conserved |
| RIBC2   | 0.01486304 | 0.00673264 | conserved  | conserved |
| RIC1    | 1.15615164 | 0.10901331 | conserved  | conserved |
| RIC3    | 0.59996967 | 0.16139173 | conserved  | conserved |
| RIC8B   | 1.06727034 | 0.10083042 | conserved  | conserved |
| RICTOR  | 1.66986109 | 0.17565687 | conserved  | conserved |

|          |            |            |            |           |
|----------|------------|------------|------------|-----------|
| RIF1     | 0.79712555 | 0.52789634 | conserved  | conserved |
| RIIAD1   | 0.0200218  | 1.36205325 | conserved  | conserved |
| RILPL1   | 1.58085571 | 0.20340585 | monkey-NSC | conserved |
| RILPL2   | 0.4629454  | 0.53660118 | conserved  | conserved |
| RIMBP2   | 0.70281737 | 0.00861493 | conserved  | conserved |
| RIMKLA   | 0.16384462 | 0.02349071 | conserved  | conserved |
| RIMS1    | 2.19610738 | 0.03489191 | monkey-NSC | conserved |
| RIMS2    | 3.78395104 | 0.04065943 | monkey-NSC | conserved |
| RIMS3    | 0.05175401 | 0.05081268 | conserved  | conserved |
| RIMS4    | 0.07310201 | 0.01104515 | conserved  | conserved |
| RIN2     | 4.04599277 | 0.23174981 | monkey-NSC | conserved |
| RIN3     | 0.10204414 | 0.00121328 | conserved  | conserved |
| RING1    | 0.15014874 | 0.49680294 | conserved  | conserved |
| RINT1    | 0.49066437 | 0.23445203 | conserved  | conserved |
| RIOK1    | 0.19353588 | 0.21211528 | conserved  | conserved |
| RIOK3    | 0.38280859 | 0.21083701 | conserved  | conserved |
| RIPK1    | 0.40512636 | 0.08453865 | conserved  | conserved |
| RIPK2    | 0.48443461 | 0.06636518 | conserved  | conserved |
| RIPK4    | 0          | 0          | conserved  | conserved |
| RIPPLY1  | 0.00165771 | 0          | conserved  | conserved |
| RIT1     | 0.10760815 | 0.52989331 | conserved  | conserved |
| RIT2     | 0.49309787 | 0.04809464 | conserved  | conserved |
| RITA1    | 0.11905525 | 0.30935911 | conserved  | conserved |
| RLBP1    | 0.13895043 | 1.66099873 | mouse-RGL  | conserved |
| RLF      | 1.45211682 | 0.1433552  | conserved  | conserved |
| RLIM     | 0.14846893 | 0.52102979 | conserved  | conserved |
| RMDN1    | 0.26852916 | 0.1378207  | conserved  | conserved |
| RMDN3    | 0.43278604 | 0.26734277 | conserved  | conserved |
| RMI1     | 0.07113162 | 0.16297367 | conserved  | conserved |
| RMND1    | 0.88277911 | 0.1943717  | conserved  | conserved |
| RMND5A   | 0.76001702 | 0.25810938 | conserved  | conserved |
| RMND5B   | 0.47854334 | 0.30891826 | conserved  | conserved |
| RNASE4   | 0.0143297  | 0.01285591 | conserved  | conserved |
| RNASE6   | 0          | 0          | conserved  | conserved |
| RNASEH2A | 0.07205622 | 0.34041839 | conserved  | conserved |
| RNASEL   | 0.02467706 | 0.08925976 | conserved  | conserved |
| RND1     | 0.04364066 | 0.01768796 | conserved  | conserved |
| RND2     | 0.00050472 | 0.21984001 | conserved  | conserved |
| RND3     | 0.13176741 | 0.27258777 | conserved  | conserved |
| RNF10    | 0.5883209  | 1.3743586  | conserved  | conserved |
| RNF103   | 0.46726573 | 0.34596035 | conserved  | conserved |

|         |            |            |            |           |
|---------|------------|------------|------------|-----------|
| RNF111  | 1.02891097 | 0.24280499 | conserved  | conserved |
| RNF112  | 0.36828226 | 0.02413531 | conserved  | conserved |
| RNF114  | 0.33734187 | 0.39182173 | conserved  | conserved |
| RNF115  | 1.65712041 | 0.87838135 | conserved  | conserved |
| RNF121  | 0.78805045 | 0.67536188 | conserved  | conserved |
| RNF122  | 0.07806253 | 0.29710219 | conserved  | conserved |
| RNF123  | 0.24870831 | 0.11048987 | conserved  | conserved |
| RNF126  | 0.24723611 | 0.34676223 | conserved  | conserved |
| RNF128  | 0.03982705 | 0.00673279 | conserved  | conserved |
| RNF130  | 5.49783947 | 0.24646403 | conserved  | conserved |
| RNF14   | 0.16887654 | 0.62874004 | conserved  | conserved |
| RNF141  | 0.10846419 | 0.27637983 | conserved  | conserved |
| RNF144A | 1.51328429 | 0.55191894 | conserved  | conserved |
| RNF144B | 0.80140757 | 0.0034067  | conserved  | conserved |
| RNF145  | 0.44568004 | 0.27733346 | conserved  | conserved |
| RNF146  | 0.33200181 | 0.75427066 | conserved  | conserved |
| RNF150  | 1.26207591 | 0.02256173 | conserved  | conserved |
| RNF151  | 0.00233756 | 0          | conserved  | conserved |
| RNF152  | 0.01507789 | 0.05430227 | conserved  | conserved |
| RNF157  | 1.77664616 | 0.11305565 | conserved  | conserved |
| RNF165  | 0.11316305 | 0.35143402 | conserved  | conserved |
| RNF167  | 0.16061138 | 0.69694646 | conserved  | conserved |
| RNF168  | 0.50520535 | 0.15369797 | conserved  | conserved |
| RNF17   | 0.02073285 | 0          | conserved  | conserved |
| RNF180  | 0.87422017 | 0.0550332  | conserved  | conserved |
| RNF182  | 0.24964788 | 1.13124275 | conserved  | conserved |
| RNF2    | 0.47870104 | 0.58017096 | conserved  | conserved |
| RNF20   | 0.34782837 | 0.53517297 | conserved  | conserved |
| RNF207  | 0.11920752 | 0          | conserved  | conserved |
| RNF212  | 0.05138001 | 0          | conserved  | conserved |
| RNF213  | 1.22656063 | 0.10754429 | monkey-NSC | conserved |
| RNF214  | 0.64966519 | 0.16295748 | conserved  | conserved |
| RNF215  | 0.09685235 | 0.37091499 | conserved  | conserved |
| RNF216  | 3.03338414 | 0.27769989 | conserved  | conserved |
| RNF217  | 0.98196552 | 0.11353885 | conserved  | conserved |
| RNF220  | 1.23637954 | 0.32169672 | conserved  | conserved |
| RNF24   | 1.89714757 | 0.25792584 | conserved  | conserved |
| RNF25   | 0.06286588 | 0.15756959 | conserved  | conserved |
| RNF32   | 0.09616419 | 0.08416258 | conserved  | conserved |
| RNF34   | 0.39045283 | 0.67249318 | conserved  | conserved |
| RNF38   | 1.65057529 | 0.19517628 | conserved  | conserved |

|          |            |            |            |           |
|----------|------------|------------|------------|-----------|
| RNF39    | 0.00825791 | 0          | conserved  | conserved |
| RNF4     | 0.60963723 | 0.68149414 | conserved  | conserved |
| RNF40    | 0.55715135 | 0.18439248 | conserved  | conserved |
| RNF44    | 0.23923079 | 0.34575537 | conserved  | conserved |
| RNF5     | 0.08497558 | 0.99568773 | conserved  | conserved |
| RNF6     | 0.05032193 | 0.34274861 | conserved  | conserved |
| RNFT2    | 0.58996884 | 0.09649794 | conserved  | conserved |
| RNGTT    | 1.42023734 | 0.20411117 | conserved  | conserved |
| RNLS     | 0.8631106  | 0.09884883 | conserved  | conserved |
| RNMT     | 1.41697028 | 0.41937855 | conserved  | conserved |
| RNPEP    | 0.24225493 | 0.38591933 | conserved  | conserved |
| RNPEPL1  | 0.09392004 | 0.37486165 | conserved  | conserved |
| ROBO1    | 5.75671089 | 0.0944932  | monkey-NSC | conserved |
| ROBO2    | 8.37442803 | 0.31314153 | monkey-NSC | conserved |
| ROCK1    | 1.61340124 | 0.61213458 | conserved  | conserved |
| ROCK2    | 1.66181558 | 0.24139416 | monkey-NSC | conserved |
| ROGDI    | 0.45120039 | 0.35716026 | conserved  | conserved |
| ROMO1    | 0.03228689 | 3.46623603 | mouse-RGL  | conserved |
| ROR1     | 2.98796351 | 0.006937   | monkey-NSC | conserved |
| ROR2     | 0.05606882 | 0.01741767 | conserved  | conserved |
| RORA     | 7.20970174 | 0.3604634  | monkey-NSC | conserved |
| RORB     | 4.51072262 | 0.46186193 | monkey-NSC | conserved |
| RORC     | 0.00668825 | 0.12306688 | conserved  | conserved |
| ROS1     | 0.72860022 | 0          | conserved  | conserved |
| RP1      | 1.11280437 | 0          | conserved  | conserved |
| RP2      | 0.05529415 | 0.23399743 | conserved  | conserved |
| RPA2     | 0.10504571 | 0.50203996 | conserved  | conserved |
| RPAP1    | 0.35467052 | 0.12668597 | conserved  | conserved |
| RPAP2    | 1.80032807 | 0.14139852 | conserved  | conserved |
| RPAP3    | 0.13677582 | 0.32153456 | conserved  | conserved |
| RPE65    | 0.62438766 | 0          | conserved  | conserved |
| RPGRIP1L | 0.50682807 | 0.10922118 | conserved  | conserved |
| RPH3A    | 0.25363886 | 0.05506777 | conserved  | conserved |
| RPIA     | 0.21107418 | 0.20797269 | conserved  | conserved |
| RPL10A   | 0.09456451 | 17.1105951 | mouse-RGL  | conserved |
| RPL15    | 0.42058647 | 7.7296947  | mouse-RGL  | conserved |
| RPL19    | 0.0296008  | 19.5036882 | mouse-RGL  | conserved |
| RPL22L1  | 0.0442481  | 15.0632341 | mouse-RGL  | conserved |
| RPL3L    | 0.00674937 | 0          | conserved  | conserved |
| RPN1     | 0.35220502 | 0.55511813 | conserved  | conserved |
| RPN2     | 0.38093316 | 0.75785781 | conserved  | conserved |



|          |            |            |            |           |
|----------|------------|------------|------------|-----------|
| RPP30    | 0.26501835 | 0.41666306 | conserved  | conserved |
| RPP40    | 0.02952791 | 0.09223428 | conserved  | conserved |
| RPRD1A   | 1.1097149  | 0.3826283  | conserved  | conserved |
| RPRD1B   | 0.36648005 | 0.18402712 | conserved  | conserved |
| RPRD2    | 3.67934453 | 0.43651103 | conserved  | conserved |
| RPRM     | 0          | 0.78831611 | mouse-RGL  | conserved |
| RPS19BP1 | 0.09241579 | 1.07753502 | mouse-RGL  | conserved |
| RPS21    | 0.00878141 | 11.0181486 | conserved  | conserved |
| RPS23    | 0.18391933 | 27.0852392 | mouse-RGL  | conserved |
| RPS27L   | 0.03970167 | 4.97515816 | mouse-RGL  | conserved |
| RPS4X    | 0.03602785 | 25.2103874 | mouse-RGL  | conserved |
| RPS6KA1  | 0.06152862 | 0.01160391 | conserved  | conserved |
| RPS6KA2  | 0.63254526 | 0.04805552 | conserved  | conserved |
| RPS6KA3  | 0.72341269 | 0.12540057 | conserved  | conserved |
| RPS6KA5  | 1.78233365 | 0.08896393 | conserved  | conserved |
| RPS6KA6  | 0.34605992 | 0.07337453 | conserved  | conserved |
| RPS6KB1  | 0.95741419 | 0.83980157 | conserved  | conserved |
| RPS6KB2  | 0.17127507 | 0.30200089 | conserved  | conserved |
| RPS6KC1  | 3.06605149 | 0.07497779 | conserved  | conserved |
| RPS6KL1  | 0.204075   | 0.01626922 | conserved  | conserved |
| RPS9     | 0.35296132 | 26.8702012 | mouse-RGL  | conserved |
| RPTN     | 0          | 0          | conserved  | conserved |
| RPTOR    | 2.49269722 | 0.17167644 | monkey-NSC | conserved |
| RPUSD2   | 0.02735492 | 0.02145902 | conserved  | conserved |
| RPUSD3   | 0.05826978 | 0.08118769 | conserved  | conserved |
| RPUSD4   | 0.30948868 | 0.05870957 | conserved  | conserved |
| RRAGA    | 0.00737944 | 1.36709582 | mouse-RGL  | conserved |
| RRAGB    | 0.43716594 | 0.05473957 | conserved  | conserved |
| RRAGC    | 0.21535971 | 0.24196574 | conserved  | conserved |
| RRAGD    | 0.15636156 | 0.58754493 | conserved  | conserved |
| RRAS     | 0.10173821 | 0.07969073 | conserved  | conserved |
| RRAS2    | 0.70234382 | 0.15137321 | conserved  | conserved |
| RRBP1    | 0.45902611 | 0.65178585 | conserved  | conserved |
| RREB1    | 0.89516871 | 0.09148244 | conserved  | conserved |
| RRH      | 0.05731122 | 0.00339769 | conserved  | conserved |
| RRM1     | 0.21724852 | 0.17769024 | conserved  | conserved |
| RRM2B    | 0.23081752 | 0.20585316 | conserved  | conserved |
| RRN3     | 0.3332035  | 0.24486293 | conserved  | conserved |
| RRNAD1   | 0.40951918 | 0.28274557 | conserved  | conserved |
| RRP1     | 0.24295648 | 1.06795202 | conserved  | conserved |
| RRP12    | 0.14807804 | 0.04245515 | conserved  | conserved |

|         |            |            |           |           |
|---------|------------|------------|-----------|-----------|
| RRP15   | 0.24201688 | 0.33686923 | conserved | conserved |
| RRP1B   | 0.31648897 | 0.15814463 | conserved | conserved |
| RRP7A   | 0.04935803 | 0.49446204 | conserved | conserved |
| RRP8    | 0.05710221 | 0.24797534 | conserved | conserved |
| RRP9    | 0.06823284 | 0.35088517 | conserved | conserved |
| RRS1    | 0.00154632 | 0.55665822 | conserved | conserved |
| RS1     | 0.00344022 | 0          | conserved | conserved |
| RSAD1   | 0.11858792 | 0.12809347 | conserved | conserved |
| RSAD2   | 0.04056687 | 0          | conserved | conserved |
| RSBN1   | 0.48772398 | 0.38694065 | conserved | conserved |
| RSBN1L  | 0.85975549 | 0.75556019 | conserved | conserved |
| RSF1    | 2.84299217 | 0.6771846  | conserved | conserved |
| RSL1D1  | 0.11648818 | 1.00634601 | mouse-RGL | conserved |
| RSPH1   | 0.04241825 | 0.14425753 | conserved | conserved |
| RSPH4A  | 0.01567321 | 0.00655032 | conserved | conserved |
| RSPH6A  | 0.03107551 | 0          | conserved | conserved |
| RSPH9   | 0.18222999 | 0.42760785 | conserved | conserved |
| RSPO1   | 0          | 0.12946797 | conserved | conserved |
| RSPO2   | 0.08789173 | 0.12977753 | conserved | conserved |
| RSPO3   | 0.09129811 | 0.33220084 | conserved | conserved |
| RSPO4   | 0.00916671 | 0          | conserved | conserved |
| RSPRY1  | 0.36588381 | 0.42802566 | conserved | conserved |
| RSRC1   | 1.22126907 | 0.45474464 | conserved | conserved |
| RSRC2   | 0.38869522 | 2.1006837  | conserved | conserved |
| RSRP1   | 2.42039399 | 4.18438082 | conserved | conserved |
| RSU1    | 0.52052314 | 0.79345742 | conserved | conserved |
| RTCA    | 0.31771134 | 0.50063232 | conserved | conserved |
| RTCB    | 0.16925651 | 0.82141887 | conserved | conserved |
| RTF1    | 1.13927222 | 1.33456641 | conserved | conserved |
| RTKN    | 0.14256234 | 0.08287331 | conserved | conserved |
| RTKN2   | 0.08556688 | 0          | conserved | conserved |
| RTN2    | 0.0786594  | 0.27495376 | conserved | conserved |
| RTN3    | 3.19651996 | 3.04348181 | conserved | conserved |
| RTN4    | 4.67355964 | 1.38420572 | conserved | conserved |
| RTN4IP1 | 0.29683452 | 0.04505402 | conserved | conserved |
| RTN4R   | 0.13721218 | 0.060049   | conserved | conserved |
| RTN4RL1 | 0.41872275 | 0.02659643 | conserved | conserved |
| RTN4RL2 | 0.05758905 | 0          | conserved | conserved |
| RTP1    | 0.02577611 | 0          | conserved | conserved |
| RTP3    | 0.00335037 | 0          | conserved | conserved |
| RTP4    | 0.00259528 | 0.02878026 | conserved | conserved |

|         |            |            |            |                      |
|---------|------------|------------|------------|----------------------|
| RTTN    | 1.02313833 | 0.00332819 | conserved  | conserved            |
| RUBCN   | 1.18464244 | 0.16080597 | conserved  | conserved            |
| RUFY1   | 1.43240881 | 0.1915938  | conserved  | conserved            |
| RUFY2   | 0.85327405 | 0.25420669 | conserved  | conserved            |
| RUFY3   | 3.50833251 | 0.78737562 | conserved  | conserved            |
| RUFY4   | 0.00495319 | 0          | conserved  | conserved            |
| RUNDC1  | 0.16995572 | 0.16429931 | conserved  | conserved            |
| RUNDC3A | 0.34312506 | 0.5582805  | conserved  | conserved            |
| RUNDC3B | 0.48085178 | 0.02543266 | conserved  | conserved            |
| RUNX1T1 | 3.00276116 | 0.04551608 | conserved  | conserved            |
| RUNX2   | 0.46200455 | 0.00582769 | conserved  | conserved            |
| RUNX3   | 0          | 0          | conserved  | conserved            |
| RUSC1   | 0.15582479 | 0.07342102 | conserved  | conserved            |
| RUVBL1  | 0.23806709 | 0.41916221 | conserved  | conserved            |
| RWDD1   | 0.18987188 | 1.93209349 | mouse-RGL  | conserved            |
| RWDD2A  | 0.03043726 | 0.02176783 | conserved  | conserved            |
| RWDD2B  | 0.16047798 | 0.05759813 | conserved  | conserved            |
| RXFP1   | 0.23382524 | 0          | conserved  | conserved            |
| RXFP2   | 0.00978123 | 0.00846737 | conserved  | conserved            |
| RXRA    | 0.37918241 | 0.08035895 | conserved  | conserved            |
| RXRB    | 0.14518727 | 0.29892092 | conserved  | conserved            |
| RXRG    | 0.05500066 | 0.04291242 | conserved  | conserved            |
| RYBP    | 0.5469611  | 0.09969321 | conserved  | conserved            |
| RYK     | 0.81510861 | 0.61434833 | conserved  | conserved            |
| RYR2    | 7.40896304 | 0.03212264 | monkey-NSC | conserved            |
| RYR3    | 2.5156986  | 0.00783262 | monkey-NSC | monkey-NSC1-enriched |
| S100A1  | 0.12086383 | 2.40614257 | conserved  | conserved            |
| S100A10 | 0.01565192 | 0.70244011 | conserved  | conserved            |
| S100A16 | 0.13470171 | 4.40348119 | conserved  | conserved            |
| S100A2  | 0.00338208 | 0          | conserved  | conserved            |
| S100A4  | 0.00174232 | 0.1708485  | conserved  | conserved            |
| S100A5  | 0          | 0          | conserved  | conserved            |
| S100A8  | 0.00100895 | 0          | conserved  | conserved            |
| S100A9  | 0.00138315 | 0          | conserved  | conserved            |
| S100G   | 0.00571666 | 0          | conserved  | conserved            |
| S100PBP | 0.64199263 | 0.12126959 | conserved  | conserved            |
| S1PR1   | 0.18671794 | 2.24455234 | monkey-NSC | conserved            |
| S1PR2   | 0          | 0.01897966 | conserved  | conserved            |
| S1PR3   | 0.00312758 | 0.28729092 | conserved  | conserved            |
| SDR42E2 | 0.01161342 | 0          | conserved  | conserved            |
| SAAL1   | 0.24707175 | 0.12832664 | conserved  | conserved            |

|         |            |            |           |           |
|---------|------------|------------|-----------|-----------|
| SAC3D1  | 0.02746282 | 0.48798633 | conserved | conserved |
| SACM1L  | 0.4929818  | 0.2711152  | conserved | conserved |
| SACS    | 1.16109868 | 0.20286039 | conserved | conserved |
| SAE1    | 0.49807827 | 0.72438905 | conserved | conserved |
| SAFB2   | 1.1101623  | 0.59437404 | conserved | conserved |
| SAG     | 0.0109659  | 0.1052115  | conserved | conserved |
| SALL1   | 0.22022485 | 0.44501873 | conserved | conserved |
| SALL2   | 0.67420034 | 0.71428007 | conserved | conserved |
| SALL4   | 0.00739161 | 0          | conserved | conserved |
| SAMD11  | 0.10347808 | 0.00571012 | conserved | conserved |
| SAMD13  | 0.06246182 | 0.01012084 | conserved | conserved |
| SAMD14  | 0.11736619 | 0.6246173  | conserved | conserved |
| SAMD15  | 0.10129714 | 0.02517105 | conserved | conserved |
| SAMD3   | 0.02541697 | 0          | conserved | conserved |
| SAMD4B  | 0.5263798  | 0.44242746 | conserved | conserved |
| SAMD8   | 0.55001108 | 0.83637341 | conserved | conserved |
| SAMHD1  | 0.13477617 | 0.19171742 | conserved | conserved |
| SAMM50  | 0.38079681 | 0.66558238 | conserved | conserved |
| SAMSN1  | 0.13720644 | 0.00402048 | conserved | conserved |
| SAP130  | 0.81351487 | 0.08357423 | conserved | conserved |
| SAP25   | 0.15420533 | 0.00909658 | conserved | conserved |
| SAP30   | 0.09767666 | 1.13818064 | mouse-RGL | conserved |
| SAP30BP | 1.08280352 | 0.35493555 | conserved | conserved |
| SAPCD1  | 0.00753562 | 0.0170203  | conserved | conserved |
| SARAF   | 0.17102332 | 1.37954868 | conserved | conserved |
| SARDH   | 0.06507135 | 0.21526922 | conserved | conserved |
| SART1   | 0.16830678 | 0.21251295 | conserved | conserved |
| SART3   | 0.45339092 | 0.1382721  | conserved | conserved |
| SASH1   | 12.9807593 | 0.85889559 | conserved | conserved |
| SASH3   | 0.00419843 | 0          | conserved | conserved |
| SASS6   | 0.20151882 | 0.06871261 | conserved | conserved |
| SAT2    | 0.49465723 | 0.47225625 | conserved | conserved |
| SATB1   | 0.56237846 | 0.39481104 | conserved | conserved |
| SATB2   | 0.33020993 | 0          | conserved | conserved |
| SATL1   | 0.01835413 | 0          | conserved | conserved |
| SAV1    | 0.25373827 | 0.11033098 | conserved | conserved |
| SAXO1   | 0.0882859  | 0          | conserved | conserved |
| SAYSD1  | 0.03928618 | 0.36362716 | conserved | conserved |
| SBF2    | 5.3726388  | 0.54368294 | conserved | conserved |
| SBNO1   | 0.93704621 | 0.80672656 | conserved | conserved |
| SBSN    | 0.00933681 | 0.29868105 | conserved | conserved |

|         |            |            |            |           |
|---------|------------|------------|------------|-----------|
| SBSPON  | 0.01626801 | 0.01625775 | conserved  | conserved |
| SC5D    | 0.19207821 | 0.44620675 | conserved  | conserved |
| SCAF11  | 1.50803868 | 0.81534606 | conserved  | conserved |
| SCAF4   | 0.62608845 | 0.13302296 | conserved  | conserved |
| SCAF8   | 2.81756374 | 0.19107051 | monkey-NSC | conserved |
| SCAI    | 1.55334451 | 0.30744523 | conserved  | conserved |
| SCAMP1  | 0.92245817 | 0.61254272 | conserved  | conserved |
| SCAMP4  | 0.31321757 | 0          | conserved  | conserved |
| SCAP    | 0.56874241 | 0.30097589 | conserved  | conserved |
| SCAPER  | 5.25079022 | 0.24541325 | conserved  | conserved |
| SCARA3  | 1.01710567 | 0.33108237 | monkey-NSC | conserved |
| SCARA5  | 0.02070936 | 0          | conserved  | conserved |
| SCARB1  | 1.30610207 | 0.25440612 | conserved  | conserved |
| SCARB2  | 0.89593438 | 1.22638406 | conserved  | conserved |
| SCARF1  | 0.03371836 | 0          | conserved  | conserved |
| SCARF2  | 0.5946891  | 0.03600736 | conserved  | conserved |
| SCCPDH  | 0.51987342 | 0.57839925 | conserved  | conserved |
| SCEL    | 0.0089496  | 0          | conserved  | conserved |
| SCFD1   | 1.40040716 | 0.37404401 | conserved  | conserved |
| SCFD2   | 2.26907994 | 0.0487577  | monkey-NSC | conserved |
| SCG3    | 1.27064208 | 3.23280213 | conserved  | conserved |
| SCGB1A1 | 0          | 0          | conserved  | conserved |
| SCGB3A1 | 0.00143159 | 0          | conserved  | conserved |
| SCGB3A2 | 0          | 0          | conserved  | conserved |
| SCGN    | 0.00345583 | 0          | conserved  | conserved |
| SCIMP   | 0.05546303 | 0          | conserved  | conserved |
| SCIN    | 0.01361379 | 0          | conserved  | conserved |
| SCLT1   | 1.81720182 | 0.16762422 | monkey-NSC | conserved |
| SCLY    | 0.68064375 | 0.13310024 | conserved  | conserved |
| SCMH1   | 3.02578254 | 0.32280182 | conserved  | conserved |
| SCML2   | 0.13983123 | 0.01348995 | conserved  | conserved |
| SCML4   | 0.06846761 | 0.0045456  | conserved  | conserved |
| SCN10A  | 0.01332543 | 0          | conserved  | conserved |
| SCN11A  | 0.01779018 | 0.00376824 | conserved  | conserved |
| SCN1A   | 2.27942897 | 0.00353214 | monkey-NSC | conserved |
| SCN1B   | 0.12209583 | 0.09480395 | conserved  | conserved |
| SCN2B   | 0.11765635 | 0.04699586 | conserved  | conserved |
| SCN3A   | 0.79042432 | 0.05666476 | conserved  | conserved |
| SCN3B   | 0.72961169 | 0.11131046 | conserved  | conserved |
| SCN4A   | 0.00212196 | 0          | conserved  | conserved |
| SCN5A   | 0.00353698 | 0.00303076 | conserved  | conserved |

|         |            |            |            |           |
|---------|------------|------------|------------|-----------|
| SCN8A   | 1.43577214 | 0.11599662 | conserved  | conserved |
| SCN9A   | 0.12922203 | 0.00479281 | conserved  | conserved |
| SCNN1A  | 0.05544432 | 0          | conserved  | conserved |
| SCNN1B  | 0.04230752 | 0          | conserved  | conserved |
| SCNN1G  | 0.00287875 | 0          | conserved  | conserved |
| SCP2    | 1.38291415 | 4.30934824 | conserved  | conserved |
| SCRG1   | 0.01563223 | 1.93594318 | conserved  | conserved |
| SCRN1   | 1.29562261 | 0.99592503 | conserved  | conserved |
| SCRN3   | 0.17815892 | 0.05043845 | conserved  | conserved |
| SCRT1   | 0.00234065 | 0.02143959 | conserved  | conserved |
| SCTR    | 0.05440309 | 0.0831422  | conserved  | conserved |
| SCUBE1  | 0.07635386 | 0.00182916 | conserved  | conserved |
| SCUBE3  | 0.0814028  | 0.00715429 | conserved  | conserved |
| SCYL3   | 0.5744268  | 0.0770533  | conserved  | conserved |
| SDAD1   | 0.25486779 | 0.23602789 | conserved  | conserved |
| SDC2    | 3.21782389 | 0.91469532 | conserved  | conserved |
| SDC3    | 0.52195072 | 0.38305477 | conserved  | conserved |
| SDC4    | 1.6396426  | 1.4295771  | monkey-NSC | conserved |
| SDCBP2  | 0.02015996 | 0          | conserved  | conserved |
| SDCCAG8 | 4.2353505  | 0.11050929 | monkey-NSC | conserved |
| SDE2    | 0.14182146 | 0.43799348 | conserved  | conserved |
| SDF2    | 0.12507941 | 1.03458691 | conserved  | conserved |
| SDF2L1  | 0.01503648 | 0.3745354  | conserved  | conserved |
| SDF4    | 0.3417198  | 1.13803535 | conserved  | conserved |
| SDHAF1  | 0          | 0.7795968  | conserved  | conserved |
| SDHAF4  | 0.21561455 | 1.29121732 | conserved  | conserved |
| SDK1    | 0.58111644 | 0.02931292 | conserved  | conserved |
| SDK2    | 0.38280479 | 0.04552435 | conserved  | conserved |
| SDR16C5 | 0.00485196 | 0          | conserved  | conserved |
| SDR39U1 | 0.0820557  | 0.133053   | conserved  | conserved |
| SDR42E1 | 0.02683187 | 0.01386587 | conserved  | conserved |
| SDS     | 1.18587928 | 0          | conserved  | conserved |
| SDSL    | 0.20639383 | 0.09216856 | conserved  | conserved |
| SEC11C  | 0.29799845 | 0.44743877 | conserved  | conserved |
| SEC13   | 0.23664509 | 0.67781232 | conserved  | conserved |
| SEC14L1 | 1.50644194 | 0.37131576 | conserved  | conserved |
| SEC14L3 | 0.00238379 | 0          | conserved  | conserved |
| SEC14L4 | 0.0010369  | 0          | conserved  | conserved |
| SEC14L5 | 0.72368577 | 0          | conserved  | conserved |
| SEC16A  | 0.38804313 | 0.21102418 | conserved  | conserved |
| SEC16B  | 0.00685429 | 0.00962198 | conserved  | conserved |

|           |            |            |            |           |
|-----------|------------|------------|------------|-----------|
| SEC22A    | 0.88245746 | 0.21318709 | conserved  | conserved |
| SEC22B    | 0.14808498 | 0.77359236 | conserved  | conserved |
| SEC22C    | 0.17887588 | 0.08548628 | conserved  | conserved |
| SEC23A    | 0.7468072  | 0.49853857 | conserved  | conserved |
| SEC23B    | 0.24232138 | 0.27372984 | conserved  | conserved |
| SEC23IP   | 0.59869917 | 0.15677224 | conserved  | conserved |
| SEC24B    | 1.54656634 | 0.19625061 | conserved  | conserved |
| SEC24D    | 0.1755765  | 0.11963949 | conserved  | conserved |
| SEC31A    | 1.31671663 | 0.26137798 | conserved  | conserved |
| SEC31B    | 0.43067941 | 0.00444757 | conserved  | conserved |
| SEC61A1   | 0.1281692  | 0.70268486 | conserved  | conserved |
| SEC62     | 0.76833163 | 2.92549959 | conserved  | conserved |
| SEC63     | 1.48430832 | 0.53664015 | conserved  | conserved |
| SECISBP2L | 1.56498386 | 0.54855457 | monkey-NSC | conserved |
| SEL1L     | 0.62282847 | 0.5684617  | conserved  | conserved |
| SEL1L2    | 0.03670168 | 0          | conserved  | conserved |
| SEL1L3    | 2.28782445 | 0.18433101 | monkey-NSC | conserved |
| SELE      | 0          | 0          | conserved  | conserved |
| SELL      | 0.00287661 | 0          | conserved  | conserved |
| SELP      | 0          | 0          | conserved  | conserved |
| SELPLG    | 0.01987143 | 0.01007149 | conserved  | conserved |
| SEMA3A    | 0.2835792  | 0.03442379 | conserved  | conserved |
| SEMA3B    | 1.15579814 | 0.04988634 | conserved  | conserved |
| SEMA3C    | 0.15246258 | 0.22812263 | conserved  | conserved |
| SEMA3D    | 0.03347965 | 0.00495112 | conserved  | conserved |
| SEMA3E    | 0.41702581 | 0.04518721 | conserved  | conserved |
| SEMA3F    | 0.05648751 | 0          | conserved  | conserved |
| SEMA3G    | 0.00054377 | 0          | conserved  | conserved |
| SEMA4A    | 0.89108061 | 0.06272004 | conserved  | conserved |
| SEMA4B    | 1.4310742  | 0.34701462 | monkey-NSC | conserved |
| SEMA4C    | 0.00271555 | 0.07220338 | conserved  | conserved |
| SEMA4F    | 0.10378609 | 0.02666972 | conserved  | conserved |
| SEMA4G    | 0.12041883 | 0.11629121 | conserved  | conserved |
| SEMA5A    | 1.56912992 | 0.09172328 | conserved  | conserved |
| SEMA5B    | 0.25046179 | 0.3149899  | conserved  | conserved |
| SEMA6A    | 0.71743201 | 0.7841713  | conserved  | conserved |
| SEMA6B    | 0.0327023  | 0.09389786 | conserved  | conserved |
| SEMA6D    | 0.85949458 | 0.7287693  | conserved  | conserved |
| SEMA7A    | 0.05013711 | 0.01032475 | conserved  | conserved |
| SENP5     | 2.26312269 | 0.12047034 | monkey-NSC | conserved |
| SENP7     | 2.0253102  | 0.38760786 | conserved  | conserved |

|           |            |            |            |           |
|-----------|------------|------------|------------|-----------|
| SENP8     | 0.08109892 | 0.11357451 | conserved  | conserved |
| SEPSECS   | 0.30347208 | 0.06628044 | conserved  | conserved |
| SERAC1    | 0.43233384 | 0          | conserved  | conserved |
| SERBP1    | 0.43341629 | 3.85717852 | mouse-RGL  | conserved |
| SERGEF    | 1.51757852 | 0.10619019 | conserved  | conserved |
| SERINC1   | 0.75118794 | 1.20525554 | conserved  | conserved |
| SERINC2   | 0.01782175 | 0.10287202 | conserved  | conserved |
| SERINC3   | 0.64957899 | 0.22229614 | conserved  | conserved |
| SERINC5   | 0.80625748 | 0.10539606 | conserved  | conserved |
| SERP1     | 0.10053358 | 1.7467933  | mouse-RGL  | conserved |
| SERPINA10 | 0.00119805 | 0          | conserved  | conserved |
| SERPINA12 | 0          | 0          | conserved  | conserved |
| SERPINA5  | 0          | 0          | conserved  | conserved |
| SERPINA6  | 0          | 0          | conserved  | conserved |
| SERPINA9  | 0          | 0.00337361 | conserved  | conserved |
| SERPINB10 | 0          | 0          | conserved  | conserved |
| SERPINB11 | 0          | 0          | conserved  | conserved |
| SERPINB12 | 0.00719247 | 0          | conserved  | conserved |
| SERPINB13 | 0.03945289 | 0          | conserved  | conserved |
| SERPINB2  | 0.00277468 | 0          | conserved  | conserved |
| SERPINB5  | 0.0035772  | 0          | conserved  | conserved |
| SERPINB7  | 0.0155899  | 0          | conserved  | conserved |
| SERPINB8  | 0.00909422 | 0          | conserved  | conserved |
| SERPINC1  | 0.01203044 | 0.01660829 | conserved  | conserved |
| SERPIND1  | 0.07398991 | 0          | conserved  | conserved |
| SERPINE1  | 0          | 0          | conserved  | conserved |
| SERPINE2  | 1.43090813 | 1.22072589 | monkey-NSC | conserved |
| SERPINE3  | 0.06371596 | 0          | conserved  | conserved |
| SERPINF1  | 0.02695461 | 0.07842678 | conserved  | conserved |
| SERPINF2  | 0.01376267 | 0.00351572 | conserved  | conserved |
| SERPING1  | 0.1169506  | 0.07145171 | conserved  | conserved |
| SERPINH1  | 0.0616248  | 1.12554102 | mouse-RGL  | conserved |
| SERPINI1  | 0.62090434 | 0.07278342 | conserved  | conserved |
| SERTAD1   | 0.02527986 | 0.11528908 | conserved  | conserved |
| SERTAD2   | 0.42034906 | 0.82413734 | conserved  | conserved |
| SERTAD3   | 0.01502897 | 0.19227291 | conserved  | conserved |
| SERTAD4   | 0.02920432 | 0.05662126 | conserved  | conserved |
| SERTM1    | 0.10125691 | 0.04369595 | conserved  | conserved |
| SESN1     | 1.75450227 | 0.27058053 | conserved  | conserved |
| SESN2     | 0.12827812 | 0.06173493 | conserved  | conserved |
| SESN3     | 0.8611472  | 1.22880031 | conserved  | conserved |



|        |            |            |            |                      |
|--------|------------|------------|------------|----------------------|
| SESTD1 | 0.81515441 | 0.11382432 | conserved  | conserved            |
| SETD2  | 2.726725   | 0.38914385 | conserved  | conserved            |
| SETD3  | 1.18367158 | 0.42017604 | conserved  | conserved            |
| SETD4  | 0.18998867 | 0.06610011 | conserved  | conserved            |
| SETD6  | 0.06515522 | 0.1835578  | conserved  | conserved            |
| SETD7  | 0.94525113 | 0.24215322 | conserved  | conserved            |
| SETDB1 | 0.69292616 | 0.18610354 | conserved  | conserved            |
| SETDB2 | 0.31714198 | 0.01118171 | conserved  | conserved            |
| SETX   | 1.45602739 | 0.18122356 | conserved  | conserved            |
| SEZ6   | 0.11232521 | 0.06302052 | conserved  | conserved            |
| SEZ6L  | 0.41761616 | 0.23549778 | conserved  | conserved            |
| SEZ6L2 | 0.24691311 | 0.03473257 | conserved  | conserved            |
| SF1    | 1.27739393 | 0.89936159 | conserved  | conserved            |
| SF3A1  | 0.31832861 | 0.35362596 | conserved  | conserved            |
| SF3A2  | 0.28066642 | 0.31272656 | conserved  | conserved            |
| SF3A3  | 0.34331056 | 0.22147177 | conserved  | conserved            |
| SF3B2  | 0.23153236 | 2.01162461 | conserved  | conserved            |
| SF3B3  | 0.68333106 | 0.2564594  | conserved  | conserved            |
| SF3B4  | 0.05226032 | 0.70140009 | conserved  | conserved            |
| SF3B6  | 0.13992163 | 3.18612808 | mouse-RGL  | conserved            |
| SFI1   | 0.53251297 | 0.11571835 | conserved  | conserved            |
| SFMBT1 | 0.34624578 | 0.11544593 | conserved  | conserved            |
| SFMBT2 | 2.35511842 | 0.06005142 | monkey-NSC | monkey-NSC1-enriched |
| SFN    | 0          | 0.00298363 | conserved  | conserved            |
| SFR1   | 0.03383918 | 1.8535489  | mouse-RGL  | conserved            |
| SFRP1  | 0.03144424 | 1.61245942 | mouse-RGL  | conserved            |
| SFRP2  | 0          | 0.05197054 | conserved  | conserved            |
| SFRP4  | 0.00495944 | 0.0603204  | conserved  | conserved            |
| SFSWAP | 1.57314272 | 0.48422516 | conserved  | conserved            |
| SFTPB  | 0          | 0          | conserved  | conserved            |
| SFTPC  | 0.00390311 | 0.00379047 | conserved  | conserved            |
| SFXN1  | 3.29681968 | 2.53729041 | conserved  | conserved            |
| SFXN4  | 0.73670288 | 0.12824073 | conserved  | conserved            |
| SFXN5  | 9.89406215 | 4.01310248 | monkey-NSC | conserved            |
| SGCA   | 0          | 0.00288907 | conserved  | conserved            |
| SGCD   | 0.95609815 | 0.03334901 | conserved  | conserved            |
| SGCE   | 1.85101595 | 0.39306482 | conserved  | conserved            |
| SGCG   | 0.46102216 | 0          | conserved  | conserved            |
| SGCZ   | 4.22422156 | 0.01051992 | monkey-NSC | conserved            |
| SGF29  | 0.30571951 | 0.32182489 | conserved  | conserved            |
| SGIP1  | 5.36979413 | 0.82419068 | monkey-NSC | conserved            |

|          |            |            |            |           |
|----------|------------|------------|------------|-----------|
| SGK1     | 1.07061775 | 0.02591525 | conserved  | conserved |
| SGK2     | 0.05594532 | 0          | conserved  | conserved |
| SGMS1    | 0.6455124  | 0.14694126 | conserved  | conserved |
| SGMS2    | 0.11146287 | 0.02122249 | conserved  | conserved |
| SGPL1    | 0.25923385 | 0.26064333 | conserved  | conserved |
| SGPP2    | 0.28194301 | 0          | conserved  | conserved |
| SGSM1    | 0.47391194 | 0.03321749 | conserved  | conserved |
| SGSM2    | 0.83289029 | 0.16429563 | conserved  | conserved |
| SGTA     | 0.31834222 | 1.07564919 | conserved  | conserved |
| SGTB     | 0.28115684 | 0.07014305 | conserved  | conserved |
| SH2B3    | 0.21147702 | 0.0551     | conserved  | conserved |
| SH2D1A   | 0          | 0          | conserved  | conserved |
| SH2D2A   | 0          | 0          | conserved  | conserved |
| SH2D3C   | 0.10947445 | 0.04775737 | conserved  | conserved |
| SH2D5    | 0.03681842 | 0.01196028 | conserved  | conserved |
| SH2D7    | 0.00544913 | 0.00359538 | conserved  | conserved |
| SH3BGRL  | 0.70262802 | 1.61325544 | conserved  | conserved |
| SH3BGRL2 | 0.44153744 | 0.02221161 | conserved  | conserved |
| SH3BP2   | 0.45272812 | 0.02184333 | conserved  | conserved |
| SH3BP4   | 0.20602995 | 0.14422899 | conserved  | conserved |
| SH3BP5   | 0.22256249 | 0.08571484 | conserved  | conserved |
| SH3BP5L  | 0.14509262 | 0.27255868 | conserved  | conserved |
| SH3D19   | 1.14068755 | 0.18722347 | conserved  | conserved |
| SH3D21   | 0.02072654 | 0.01591259 | conserved  | conserved |
| SH3GL1   | 0.29027642 | 0.38778183 | conserved  | conserved |
| SH3GL2   | 1.3769453  | 0.14647388 | conserved  | conserved |
| SH3GL3   | 2.19044097 | 0.20392353 | conserved  | conserved |
| SH3GLB1  | 1.06180229 | 1.7046351  | conserved  | conserved |
| SH3KBP1  | 0.65836704 | 0.14338272 | conserved  | conserved |
| SH3PXD2A | 0.58780274 | 0.01297311 | conserved  | conserved |
| SH3PXD2B | 1.22943117 | 0.41104129 | monkey-NSC | conserved |
| SH3RF1   | 4.5483524  | 0.3195085  | conserved  | conserved |
| SH3RF2   | 0.02476041 | 0          | conserved  | conserved |
| SH3RF3   | 2.5884229  | 0.05064259 | conserved  | conserved |
| SH3TC2   | 0.05749437 | 0          | conserved  | conserved |
| SH3YL1   | 0.10598044 | 0.06887407 | conserved  | conserved |
| SHANK2   | 1.39093832 | 0.05538476 | conserved  | conserved |
| SHARPIN  | 0.19882958 | 0.25513708 | conserved  | conserved |
| SHBG     | 0.03827872 | 0          | conserved  | conserved |
| SHC1     | 0.10881627 | 0.14405684 | conserved  | conserved |
| SHC4     | 0.04309595 | 0.02276206 | conserved  | conserved |

|          |            |            |            |           |
|----------|------------|------------|------------|-----------|
| SHCBP1   | 0.01433857 | 0.02105166 | conserved  | conserved |
| SHD      | 0.00717475 | 0.30925017 | conserved  | conserved |
| SHE      | 0.00966942 | 0          | conserved  | conserved |
| SHF      | 0.17434305 | 0.02821767 | conserved  | conserved |
| SHH      | 0.00120223 | 0          | conserved  | conserved |
| SHISA4   | 0.00799075 | 2.26980859 | conserved  | conserved |
| SHISA8   | 0.00293493 | 0.0526461  | conserved  | conserved |
| SHKBP1   | 0.0220019  | 0.14782707 | conserved  | conserved |
| SHMT1    | 0.14586815 | 0.11186172 | conserved  | conserved |
| SHMT2    | 0.04143726 | 0.27535911 | conserved  | conserved |
| SHOX2    | 0          | 0          | conserved  | conserved |
| SHPRH    | 1.74416697 | 0.27262633 | conserved  | conserved |
| SHQ1     | 0.26567767 | 0.02342362 | conserved  | conserved |
| SHROOM3  | 3.03490026 | 0.43016631 | conserved  | conserved |
| SHROOM4  | 0.31253757 | 0.04391362 | conserved  | conserved |
| SHTN1    | 1.21902146 | 0.0643734  | conserved  | conserved |
| SIAE     | 0.12015707 | 0.06097232 | conserved  | conserved |
| SIAH2    | 0.16902309 | 0.17088254 | conserved  | conserved |
| SIAH3    | 0.0447263  | 0.03064001 | conserved  | conserved |
| SIDT1    | 0.48518988 | 0.01006328 | conserved  | conserved |
| SIDT2    | 0.12189647 | 0.28421887 | conserved  | conserved |
| SIGLEC1  | 0.01441867 | 0          | conserved  | conserved |
| SIGLEC15 | 0.00185245 | 0          | conserved  | conserved |
| SIGMAR1  | 0.06332408 | 0.25902815 | conserved  | conserved |
| SIK2     | 2.37236387 | 0.07998218 | conserved  | conserved |
| SIK3     | 9.71852571 | 0.30130943 | monkey-NSC | conserved |
| SIKE1    | 0.13016706 | 0.54794993 | conserved  | conserved |
| SIL1     | 2.09145628 | 0.21675568 | conserved  | conserved |
| SIM1     | 0          | 0          | conserved  | conserved |
| SIMC1    | 0.70557645 | 0.08693556 | conserved  | conserved |
| SIN3A    | 0.70609705 | 0.2663375  | conserved  | conserved |
| SIN3B    | 0.7063888  | 1.17345782 | conserved  | conserved |
| SIPA1L1  | 3.94330832 | 0.46986816 | conserved  | conserved |
| SIPA1L2  | 0.63813251 | 0.03590573 | conserved  | conserved |
| SIPA1L3  | 1.24471988 | 0.10172185 | conserved  | conserved |
| SIRT1    | 0.59619997 | 0.10786127 | conserved  | conserved |
| SIRT3    | 0.18859566 | 0.54831734 | conserved  | conserved |
| SIRT4    | 0.09817992 | 0.08518728 | conserved  | conserved |
| SIRT5    | 1.24629695 | 0.14678228 | conserved  | conserved |
| SIRT6    | 0.1244071  | 0.17186931 | conserved  | conserved |
| SIT1     | 0          | 0          | conserved  | conserved |

|         |            |            |            |           |
|---------|------------|------------|------------|-----------|
| SIVA1   | 0.05850187 | 1.28745919 | mouse-RGL  | conserved |
| SIX2    | 0          | 0          | conserved  | conserved |
| SIX3    | 0.00300781 | 0.02210765 | conserved  | conserved |
| SKA1    | 0.00997619 | 0.00069856 | conserved  | conserved |
| SKA2    | 1.0372865  | 0.15570504 | conserved  | conserved |
| SKA3    | 0.02194474 | 0.01719222 | conserved  | conserved |
| SKAP2   | 0.27674006 | 0.03906668 | conserved  | conserved |
| SKI     | 0.76224182 | 0.84167751 | conserved  | conserved |
| SKIDA1  | 0.03604283 | 0.12303681 | conserved  | conserved |
| SKIL    | 0.25227306 | 0.27502523 | conserved  | conserved |
| SKIV2L  | 0.07878109 | 0.20027527 | conserved  | conserved |
| SKOR1   | 0          | 0          | conserved  | conserved |
| SKP2    | 0.19245091 | 0.39200759 | conserved  | conserved |
| SLA     | 0.12985685 | 0.00354285 | conserved  | conserved |
| SLAIN1  | 1.0116217  | 0.17656806 | conserved  | conserved |
| SLAMF1  | 0.00069265 | 0.02108625 | conserved  | conserved |
| SLAMF6  | 0          | 0          | conserved  | conserved |
| SLAMF7  | 0          | 0          | conserved  | conserved |
| SLAMF8  | 0.00169079 | 0          | conserved  | conserved |
| SLAMF9  | 0.00876062 | 0          | conserved  | conserved |
| SLBP    | 0.11015641 | 0.97015217 | conserved  | conserved |
| SLC10A1 | 0.02623572 | 0          | conserved  | conserved |
| SLC10A2 | 0.00168286 | 0          | conserved  | conserved |
| SLC10A4 | 0.04309201 | 0.00379719 | conserved  | conserved |
| SLC10A6 | 0.00615404 | 0          | conserved  | conserved |
| SLC10A7 | 2.04492274 | 0.04160337 | monkey-NSC | conserved |
| SLC11A1 | 0.04461802 | 0          | conserved  | conserved |
| SLC11A2 | 0.53688452 | 0.17131126 | conserved  | conserved |
| SLC12A1 | 0.0173293  | 0          | conserved  | conserved |
| SLC12A2 | 0.38102073 | 0.54751624 | conserved  | conserved |
| SLC12A3 | 0.13767874 | 0          | conserved  | conserved |
| SLC12A4 | 0.18697296 | 0.33059802 | conserved  | conserved |
| SLC12A5 | 0.22688242 | 0.05713987 | conserved  | conserved |
| SLC12A7 | 0.0435835  | 0.07069065 | conserved  | conserved |
| SLC12A8 | 0.20381403 | 0.00560192 | conserved  | conserved |
| SLC12A9 | 0.12728106 | 0.15954668 | conserved  | conserved |
| SLC13A1 | 0.005943   | 0          | conserved  | conserved |
| SLC13A3 | 0.98185313 | 0.23148252 | conserved  | conserved |
| SLC13A4 | 0.13954319 | 0.01300606 | conserved  | conserved |
| SLC13A5 | 0.15970977 | 0.31759326 | conserved  | conserved |
| SLC14A1 | 0.61471436 | 0.60369178 | conserved  | conserved |

|          |            |            |            |           |
|----------|------------|------------|------------|-----------|
| SLC15A1  | 0.01254338 | 0.00611306 | conserved  | conserved |
| SLC15A2  | 5.0987728  | 0.78189033 | monkey-NSC | conserved |
| SLC15A3  | 0.00485677 | 0          | conserved  | conserved |
| SLC15A4  | 0.25865699 | 0.06074796 | conserved  | conserved |
| SLC15A5  | 0.01181058 | 0          | conserved  | conserved |
| SLC16A1  | 0.06190797 | 0.2318017  | conserved  | conserved |
| SLC16A11 | 0.01276422 | 0.00353895 | conserved  | conserved |
| SLC16A12 | 0.01785203 | 0.00669609 | conserved  | conserved |
| SLC16A14 | 0.12777367 | 0          | conserved  | conserved |
| SLC16A2  | 0.33482306 | 0.55855608 | conserved  | conserved |
| SLC16A4  | 0.17638528 | 0          | conserved  | conserved |
| SLC16A5  | 0.02982515 | 0          | conserved  | conserved |
| SLC16A7  | 0.26406514 | 0.01576535 | conserved  | conserved |
| SLC16A9  | 0.25298023 | 0.0048746  | conserved  | conserved |
| SLC17A1  | 0.012405   | 0          | conserved  | conserved |
| SLC17A2  | 0.00602945 | 0          | conserved  | conserved |
| SLC17A3  | 0.00231371 | 0          | conserved  | conserved |
| SLC17A4  | 0.00706052 | 0          | conserved  | conserved |
| SLC17A5  | 1.99722424 | 0.09864002 | conserved  | conserved |
| SLC17A6  | 0.0318874  | 0.01449267 | conserved  | conserved |
| SLC17A9  | 0          | 0.0087712  | conserved  | conserved |
| SLC18A1  | 0          | 0          | conserved  | conserved |
| SLC18A2  | 0.0238803  | 0          | conserved  | conserved |
| SLC18B1  | 0.30443655 | 0.12176458 | conserved  | conserved |
| SLC19A1  | 0.09503583 | 0.23431648 | conserved  | conserved |
| SLC19A2  | 0.35897405 | 0.0334033  | conserved  | conserved |
| SLC19A3  | 0          | 0          | conserved  | conserved |
| SLC1A1   | 0.50070394 | 0.00834787 | conserved  | conserved |
| SLC1A2   | 162.849046 | 16.7839843 | monkey-NSC | conserved |
| SLC1A3   | 41.0442275 | 29.9839626 | monkey-NSC | conserved |
| SLC1A4   | 1.56643716 | 1.29742795 | conserved  | conserved |
| SLC1A5   | 0.00933831 | 0.0397019  | conserved  | conserved |
| SLC1A6   | 0.11594633 | 0.00642054 | conserved  | conserved |
| SLC1A7   | 0          | 0          | conserved  | conserved |
| SLC20A1  | 0.38303094 | 0.23670225 | conserved  | conserved |
| SLC20A2  | 1.93964201 | 0.58095671 | monkey-NSC | conserved |
| SLC22A1  | 0.00095763 | 0          | conserved  | conserved |
| SLC22A12 | 0.00122209 | 0.01901507 | conserved  | conserved |
| SLC22A14 | 0.00470235 | 0          | conserved  | conserved |
| SLC22A15 | 0.97280385 | 0.10850755 | monkey-NSC | conserved |
| SLC22A16 | 0.01839075 | 0          | conserved  | conserved |

|          |            |            |            |           |
|----------|------------|------------|------------|-----------|
| SLC22A17 | 1.31387934 | 1.26964606 | conserved  | conserved |
| SLC22A18 | 0.03567265 | 0          | conserved  | conserved |
| SLC22A2  | 0.0159206  | 0          | conserved  | conserved |
| SLC22A23 | 4.96924779 | 0.23596928 | conserved  | conserved |
| SLC22A3  | 0.23383736 | 0          | conserved  | conserved |
| SLC22A6  | 0.09593446 | 0.00657556 | conserved  | conserved |
| SLC22A7  | 0.02391633 | 0          | conserved  | conserved |
| SLC22A8  | 0.02398456 | 0.00329745 | conserved  | conserved |
| SLC23A1  | 0.0450523  | 0          | conserved  | conserved |
| SLC23A2  | 0.55592226 | 0.30409085 | conserved  | conserved |
| SLC23A3  | 0.00084532 | 0          | conserved  | conserved |
| SLC24A1  | 0.01982982 | 0.00571012 | conserved  | conserved |
| SLC24A2  | 2.16045381 | 0.04510611 | monkey-NSC | conserved |
| SLC24A3  | 14.6127206 | 0.16906007 | conserved  | conserved |
| SLC24A4  | 0.40642952 | 0          | conserved  | conserved |
| SLC24A5  | 0.22867655 | 1.30997121 | conserved  | conserved |
| SLC25A1  | 0.19977258 | 0.40970677 | conserved  | conserved |
| SLC25A11 | 0.05044599 | 0.86106611 | mouse-RGL  | conserved |
| SLC25A12 | 1.88054751 | 0.13052001 | conserved  | conserved |
| SLC25A13 | 1.88858573 | 0.04491889 | conserved  | conserved |
| SLC25A14 | 0.19440397 | 0.25401289 | conserved  | conserved |
| SLC25A17 | 0.56840247 | 0.4181543  | conserved  | conserved |
| SLC25A18 | 9.19069847 | 2.23448381 | conserved  | conserved |
| SLC25A19 | 0.10332365 | 0.2073082  | conserved  | conserved |
| SLC25A2  | 0          | 0          | conserved  | conserved |
| SLC25A20 | 0.33144598 | 0.18408827 | conserved  | conserved |
| SLC25A21 | 0.32786657 | 0          | conserved  | conserved |
| SLC25A22 | 0.12531531 | 0.11539773 | conserved  | conserved |
| SLC25A23 | 0.13679332 | 0.80424617 | conserved  | conserved |
| SLC25A24 | 0.11445775 | 0.01985129 | conserved  | conserved |
| SLC25A26 | 1.0656619  | 0.10109972 | conserved  | conserved |
| SLC25A27 | 0.71262358 | 0.07259314 | conserved  | conserved |
| SLC25A28 | 0.81530165 | 0.15282016 | conserved  | conserved |
| SLC25A29 | 0.89615978 | 0.11788387 | conserved  | conserved |
| SLC25A30 | 0.16783412 | 0          | conserved  | conserved |
| SLC25A34 | 0.22094759 | 0.00982271 | conserved  | conserved |
| SLC25A35 | 0.02187281 | 0.01680854 | conserved  | conserved |
| SLC25A37 | 0.91861646 | 0.11426777 | conserved  | conserved |
| SLC25A38 | 0.1649116  | 0.2697617  | conserved  | conserved |
| SLC25A39 | 0.08377203 | 0.34702491 | conserved  | conserved |
| SLC25A4  | 0.24755278 | 6.0014879  | mouse-RGL  | conserved |

|          |            |            |           |           |
|----------|------------|------------|-----------|-----------|
| SLC25A40 | 0.42182886 | 0.05356715 | conserved | conserved |
| SLC25A45 | 0.01667591 | 0.00428878 | conserved | conserved |
| SLC25A46 | 0.44737396 | 0.46942628 | conserved | conserved |
| SLC26A11 | 0.71328474 | 0.03201168 | conserved | conserved |
| SLC26A2  | 0.03887452 | 0.07418195 | conserved | conserved |
| SLC26A4  | 0.0861496  | 0.00804701 | conserved | conserved |
| SLC26A5  | 0.20135943 | 0          | conserved | conserved |
| SLC26A6  | 0.0254077  | 0.10042188 | conserved | conserved |
| SLC26A7  | 0.01639062 | 0.04633751 | conserved | conserved |
| SLC26A8  | 0.05440971 | 0.00233148 | conserved | conserved |
| SLC26A9  | 0.00078787 | 0.00267113 | conserved | conserved |
| SLC27A2  | 0.02117325 | 0          | conserved | conserved |
| SLC27A3  | 0.00991093 | 0.03961058 | conserved | conserved |
| SLC27A4  | 0.39878382 | 0.12585292 | conserved | conserved |
| SLC27A5  | 0.03210527 | 0.00211684 | conserved | conserved |
| SLC27A6  | 0.01084283 | 0.00482126 | conserved | conserved |
| SLC28A3  | 0.01942256 | 0.00298155 | conserved | conserved |
| SLC29A2  | 0.14608478 | 0.03640751 | conserved | conserved |
| SLC29A3  | 0.04626425 | 0.05425098 | conserved | conserved |
| SLC29A4  | 0.09293172 | 0.14231413 | conserved | conserved |
| SLC2A1   | 0.39910409 | 0.14600165 | conserved | conserved |
| SLC2A10  | 1.04878881 | 0.05419397 | conserved | conserved |
| SLC2A12  | 0.60104162 | 0.08747994 | conserved | conserved |
| SLC2A13  | 1.52704757 | 0.11611672 | conserved | conserved |
| SLC2A2   | 0.00294112 | 0          | conserved | conserved |
| SLC2A4   | 0.00640037 | 0.02764699 | conserved | conserved |
| SLC2A5   | 0.10274002 | 0.00422117 | conserved | conserved |
| SLC2A7   | 0.00445207 | 0          | conserved | conserved |
| SLC2A8   | 0.06743635 | 0.171641   | conserved | conserved |
| SLC2A9   | 0.06715462 | 0.18766167 | conserved | conserved |
| SLC30A1  | 0.03053423 | 0.26422464 | conserved | conserved |
| SLC30A2  | 0.0018658  | 0          | conserved | conserved |
| SLC30A3  | 0.10900839 | 0.02348946 | conserved | conserved |
| SLC30A4  | 0.21036015 | 0.32413841 | conserved | conserved |
| SLC30A5  | 0.55731284 | 0.22028885 | conserved | conserved |
| SLC30A6  | 0.37665428 | 0.07025362 | conserved | conserved |
| SLC30A7  | 0.75746546 | 0.14487041 | conserved | conserved |
| SLC30A9  | 1.53812662 | 0.83552123 | conserved | conserved |
| SLC31A1  | 0.34188667 | 0.51926671 | conserved | conserved |
| SLC31A2  | 0.08231221 | 0.09123999 | conserved | conserved |
| SLC32A1  | 0.01754182 | 0.00960259 | conserved | conserved |

|          |            |            |            |           |
|----------|------------|------------|------------|-----------|
| SLC34A1  | 0          | 0          | conserved  | conserved |
| SLC34A2  | 0.01523597 | 0          | conserved  | conserved |
| SLC35A1  | 0.57790739 | 0.38576418 | conserved  | conserved |
| SLC35A2  | 0.07228882 | 0.3279236  | conserved  | conserved |
| SLC35B1  | 0.12739163 | 0.80224309 | conserved  | conserved |
| SLC35B2  | 0.10409298 | 0.42947855 | conserved  | conserved |
| SLC35B3  | 0.20529843 | 0.11620832 | conserved  | conserved |
| SLC35C1  | 0.02703112 | 0.03587096 | conserved  | conserved |
| SLC35C2  | 0.29992481 | 0.35842379 | conserved  | conserved |
| SLC35D1  | 0.64335003 | 0.27788816 | conserved  | conserved |
| SLC35E3  | 0.2304228  | 0.16939588 | conserved  | conserved |
| SLC35E4  | 0.25693037 | 0.07681728 | conserved  | conserved |
| SLC35F1  | 3.66987136 | 0.74494937 | conserved  | conserved |
| SLC35F2  | 0.08222117 | 0.00664323 | conserved  | conserved |
| SLC35F3  | 1.09900828 | 0.00594275 | monkey-NSC | conserved |
| SLC35F4  | 0.28702957 | 0.00524837 | conserved  | conserved |
| SLC35F5  | 0.56344466 | 0.30744009 | conserved  | conserved |
| SLC35F6  | 0.16945708 | 0.1549594  | conserved  | conserved |
| SLC35G1  | 0.0147351  | 0.02744445 | conserved  | conserved |
| SLC35G2  | 0.07638601 | 0.04942315 | conserved  | conserved |
| SLC36A1  | 0.11027333 | 0.01963708 | conserved  | conserved |
| SLC36A2  | 0.01658631 | 0          | conserved  | conserved |
| SLC36A3  | 0.01055822 | 0          | conserved  | conserved |
| SLC36A4  | 0.52426389 | 0.08609141 | conserved  | conserved |
| SLC37A4  | 0.07067156 | 0.13636915 | conserved  | conserved |
| SLC38A1  | 0.30401706 | 1.84001738 | mouse-RGL  | conserved |
| SLC38A10 | 0.63040641 | 0.23769916 | conserved  | conserved |
| SLC38A11 | 0.06712159 | 0          | conserved  | conserved |
| SLC38A2  | 0.16001184 | 0.62809212 | conserved  | conserved |
| SLC38A3  | 0.29220402 | 0.38479391 | conserved  | conserved |
| SLC38A4  | 0.01729324 | 0.00275294 | conserved  | conserved |
| SLC38A5  | 0.01585097 | 0.00344412 | conserved  | conserved |
| SLC38A7  | 0.14801069 | 0.07811803 | conserved  | conserved |
| SLC38A8  | 0.0020792  | 0.00332819 | conserved  | conserved |
| SLC38A9  | 1.14423665 | 0.2168416  | conserved  | conserved |
| SLC39A10 | 1.47164224 | 0.37982493 | conserved  | conserved |
| SLC39A11 | 2.70633366 | 0.17105727 | monkey-NSC | conserved |
| SLC39A12 | 1.37322172 | 0.34980456 | monkey-NSC | conserved |
| SLC39A13 | 0.20831503 | 0.13945732 | conserved  | conserved |
| SLC39A14 | 0.17893326 | 0.14866624 | conserved  | conserved |
| SLC39A4  | 0.0157521  | 0          | conserved  | conserved |



|          |            |            |            |           |
|----------|------------|------------|------------|-----------|
| SLC39A6  | 0.16741232 | 0.5539528  | conserved  | conserved |
| SLC39A7  | 0.12843472 | 0.71831933 | conserved  | conserved |
| SLC39A8  | 0.03523941 | 0.00691916 | conserved  | conserved |
| SLC39A9  | 0.49489089 | 0.18272217 | conserved  | conserved |
| SLC3A1   | 0.12606196 | 0          | conserved  | conserved |
| SLC3A2   | 0.29338612 | 1.06566145 | conserved  | conserved |
| SLC40A1  | 0.00906785 | 0.01405223 | conserved  | conserved |
| SLC41A1  | 0.22453055 | 0.52269342 | conserved  | conserved |
| SLC41A2  | 0.3267353  | 0.01124513 | conserved  | conserved |
| SLC41A3  | 0.21363878 | 0.02258785 | conserved  | conserved |
| SLC43A1  | 0.06990457 | 0.00507343 | conserved  | conserved |
| SLC43A3  | 0.00257618 | 0.0179087  | conserved  | conserved |
| SLC44A1  | 4.19593932 | 0.33245339 | monkey-NSC | conserved |
| SLC44A3  | 0.27869539 | 0.00474123 | conserved  | conserved |
| SLC44A4  | 0.00222781 | 0          | conserved  | conserved |
| SLC44A5  | 3.62910364 | 0.03489116 | conserved  | conserved |
| SLC45A1  | 0.09689255 | 0.00180324 | conserved  | conserved |
| SLC45A3  | 0.02259773 | 0          | conserved  | conserved |
| SLC45A4  | 0.13642875 | 0.07583439 | conserved  | conserved |
| SLC46A1  | 0.03221291 | 0.08876687 | conserved  | conserved |
| SLC46A2  | 0.00280021 | 0.02640338 | conserved  | conserved |
| SLC46A3  | 0.06763003 | 0.0283486  | conserved  | conserved |
| SLC47A1  | 0.67039303 | 0          | conserved  | conserved |
| SLC48A1  | 0.26401101 | 0.93786041 | conserved  | conserved |
| SLC4A1   | 0.01912157 | 0          | conserved  | conserved |
| SLC4A10  | 2.033613   | 0.01645301 | monkey-NSC | conserved |
| SLC4A11  | 0.00529648 | 0.00829287 | conserved  | conserved |
| SLC4A1AP | 0.27073991 | 0.10627668 | conserved  | conserved |
| SLC4A2   | 0.08468206 | 0.16047579 | conserved  | conserved |
| SLC4A4   | 21.0627178 | 0.9949572  | monkey-NSC | conserved |
| SLC4A5   | 0.13615779 | 0          | conserved  | conserved |
| SLC4A7   | 0.72755118 | 0.25007874 | conserved  | conserved |
| SLC4A8   | 0.48629373 | 0.05397368 | conserved  | conserved |
| SLC4A9   | 0.18861605 | 0          | conserved  | conserved |
| SLC50A1  | 0.1487299  | 0.3560363  | conserved  | conserved |
| SLC51A   | 0.15531195 | 0          | conserved  | conserved |
| SLC52A3  | 0.00104317 | 0          | conserved  | conserved |
| SLC5A1   | 0.01015433 | 0          | conserved  | conserved |
| SLC5A10  | 0.04229715 | 0.00462855 | conserved  | conserved |
| SLC5A11  | 0.45602113 | 0.00281196 | conserved  | conserved |
| SLC5A12  | 0.0009451  | 0          | conserved  | conserved |

|          |            |            |            |           |
|----------|------------|------------|------------|-----------|
| SLC5A2   | 0.00505343 | 0          | conserved  | conserved |
| SLC5A5   | 0.01841781 | 0.00602539 | conserved  | conserved |
| SLC5A6   | 0.05399658 | 0.05882728 | conserved  | conserved |
| SLC5A7   | 0.0082399  | 0          | conserved  | conserved |
| SLC5A8   | 0.02365677 | 0          | conserved  | conserved |
| SLC5A9   | 0.00331911 | 0          | conserved  | conserved |
| SLC6A1   | 2.88896026 | 2.02197417 | monkey-NSC | conserved |
| SLC6A11  | 2.43395562 | 1.59615471 | monkey-NSC | conserved |
| SLC6A16  | 0.07581854 | 0          | conserved  | conserved |
| SLC6A17  | 0.14171754 | 0.07553991 | conserved  | conserved |
| SLC6A18  | 0          | 0          | conserved  | conserved |
| SLC6A19  | 0          | 0.00614403 | conserved  | conserved |
| SLC6A2   | 0.00276034 | 0          | conserved  | conserved |
| SLC6A3   | 0.00116876 | 0          | conserved  | conserved |
| SLC6A4   | 0.04383436 | 0          | conserved  | conserved |
| SLC6A5   | 0.00770507 | 0          | conserved  | conserved |
| SLC6A6   | 0.11636285 | 0.29431536 | conserved  | conserved |
| SLC6A7   | 0.18646124 | 0.01813765 | conserved  | conserved |
| SLC6A9   | 0.03830047 | 0.18263253 | conserved  | conserved |
| SLC7A1   | 0.105823   | 0.10273741 | conserved  | conserved |
| SLC7A11  | 2.55640027 | 0.54715124 | monkey-NSC | conserved |
| SLC7A13  | 0.00135717 | 0          | conserved  | conserved |
| SLC7A14  | 0.26689701 | 0.00398187 | conserved  | conserved |
| SLC7A2   | 1.04736414 | 0.20069539 | monkey-NSC | conserved |
| SLC7A3   | 0.00355973 | 0.00135972 | conserved  | conserved |
| SLC7A6OS | 0.12724376 | 0.2246754  | conserved  | conserved |
| SLC7A7   | 0.21432181 | 0.01861216 | conserved  | conserved |
| SLC7A8   | 0.11566385 | 0.02281727 | conserved  | conserved |
| SLC7A9   | 0.23238841 | 0          | conserved  | conserved |
| SLC8A1   | 3.20042807 | 0          | conserved  | conserved |
| SLC8A2   | 0.18618007 | 0.02767017 | conserved  | conserved |
| SLC8A3   | 0.1129119  | 0.00680301 | conserved  | conserved |
| SLC8B1   | 0.15664897 | 0.23210662 | conserved  | conserved |
| SLC9A2   | 0.30944516 | 0          | conserved  | conserved |
| SLC9A3   | 0.00071662 | 0          | conserved  | conserved |
| SLC9A3R1 | 0.48209796 | 2.20690884 | conserved  | conserved |
| SLC9A3R2 | 0.03742515 | 0.15168548 | conserved  | conserved |
| SLC9A4   | 0.01378687 | 0          | conserved  | conserved |
| SLC9A6   | 0.66073929 | 0.22455319 | conserved  | conserved |
| SLC9A7   | 0.47840408 | 0.03817488 | conserved  | conserved |
| SLC9A8   | 1.00899846 | 0.18133903 | conserved  | conserved |

|          |            |            |            |           |
|----------|------------|------------|------------|-----------|
| SLC9A9   | 4.40218154 | 0.07402318 | monkey-NSC | conserved |
| SLC9B1   | 0.47024914 | 0          | conserved  | conserved |
| SLC9B2   | 0.26583064 | 0          | conserved  | conserved |
| SLC9C1   | 0.01072248 | 0          | conserved  | conserved |
| SLCO1C1  | 2.08817915 | 1.29433712 | conserved  | conserved |
| SLCO2A1  | 0.03496443 | 0.05875634 | conserved  | conserved |
| SLCO2B1  | 0.05857034 | 0.0277903  | conserved  | conserved |
| SLCO3A1  | 1.79752879 | 0.01806756 | monkey-NSC | conserved |
| SLCO4A1  | 0.0094622  | 0          | conserved  | conserved |
| SLCO4C1  | 0.01458001 | 0          | conserved  | conserved |
| SLCO5A1  | 0.04258933 | 0.03137266 | conserved  | conserved |
| SLF1     | 0.19056629 | 0.13540018 | conserved  | conserved |
| SLFN14   | 0.00430349 | 0          | conserved  | conserved |
| SLFN5    | 0.00440007 | 0.00265787 | conserved  | conserved |
| SLFNL1   | 0.08451288 | 0          | conserved  | conserved |
| SLIRP    | 0.37472348 | 2.01481035 | conserved  | conserved |
| SLIT1    | 0.89645566 | 0.00635165 | conserved  | conserved |
| SLIT2    | 1.17752095 | 0.50441969 | conserved  | conserved |
| SLIT3    | 1.39465134 | 0.01595834 | conserved  | conserved |
| SLITRK2  | 0.33087078 | 0.36494471 | conserved  | conserved |
| SLITRK3  | 0.03347313 | 0.01639266 | conserved  | conserved |
| SLITRK4  | 0.07872508 | 0.01107385 | conserved  | conserved |
| SLITRK5  | 0.09426082 | 0.10768769 | conserved  | conserved |
| SLITRK6  | 0          | 0          | conserved  | conserved |
| SLK      | 0.84164614 | 0.13195823 | conserved  | conserved |
| SLMAP    | 2.82752653 | 0.21014279 | monkey-NSC | conserved |
| SLTM     | 1.31010635 | 0.81594654 | conserved  | conserved |
| SLU7     | 0.16811499 | 0.34750945 | conserved  | conserved |
| SLX4     | 0.06807039 | 0.03825681 | conserved  | conserved |
| SLX4IP   | 0.74749978 | 0.08914728 | conserved  | conserved |
| SMAD1    | 0.88894113 | 0.55052498 | conserved  | conserved |
| SMAD2    | 0.88290542 | 0.18902794 | conserved  | conserved |
| SMAD3    | 1.17317712 | 0.13751143 | conserved  | conserved |
| SMAD4    | 1.03472486 | 0.47239951 | conserved  | conserved |
| SMAD5    | 0.69036245 | 0.9007618  | conserved  | conserved |
| SMAP2    | 0.58761301 | 0.20207563 | conserved  | conserved |
| SMARCA1  | 0.69786532 | 0.15232066 | conserved  | conserved |
| SMARCA5  | 0.64206427 | 1.01912172 | conserved  | conserved |
| SMARCAD1 | 0.87457874 | 0.53601064 | conserved  | conserved |
| SMARCAL1 | 0.41805834 | 0.0863318  | conserved  | conserved |
| SMARCB1  | 0.54342221 | 1.26290608 | conserved  | conserved |

|         |            |            |            |           |
|---------|------------|------------|------------|-----------|
| SMARCC1 | 2.92010568 | 0.96371032 | conserved  | conserved |
| SMARCC2 | 1.09419331 | 0.4932146  | conserved  | conserved |
| SMARCD1 | 0.20102303 | 0.89824206 | conserved  | conserved |
| SMARCD3 | 0.56147338 | 0.6840788  | conserved  | conserved |
| SMC1A   | 0.26029251 | 0.36875134 | conserved  | conserved |
| SMC1B   | 0.14658951 | 0.00121328 | conserved  | conserved |
| SMC2    | 0.04913192 | 0.45068217 | conserved  | conserved |
| SMC3    | 1.0584892  | 1.02731351 | conserved  | conserved |
| SMC4    | 0.21248789 | 0.38328307 | conserved  | conserved |
| SMC6    | 0.42790533 | 1.30210146 | conserved  | conserved |
| SMCHD1  | 1.64333234 | 0.78846632 | conserved  | conserved |
| SMCO2   | 0.01855775 | 0          | conserved  | conserved |
| SMCO3   | 0          | 0          | conserved  | conserved |
| SMDT1   | 0.13909395 | 4.97076531 | mouse-RGL  | conserved |
| SMG1    | 1.67241131 | 0.28398543 | conserved  | conserved |
| SMG5    | 0.32213542 | 0.37509256 | conserved  | conserved |
| SMG6    | 3.17456858 | 0.27376598 | conserved  | conserved |
| SMG7    | 0.81395993 | 0.23965266 | conserved  | conserved |
| SMG9    | 0.34817257 | 0.25462979 | conserved  | conserved |
| SMO     | 0.8761796  | 0.51528222 | conserved  | conserved |
| SMOC1   | 0.29976857 | 0.11300961 | conserved  | conserved |
| SMOC2   | 0.1034343  | 0.01513147 | conserved  | conserved |
| SMOX    | 0.56388722 | 0.45136004 | conserved  | conserved |
| SMPD3   | 0.2326345  | 0.10941889 | conserved  | conserved |
| SMPD4   | 0.28532695 | 0.1266908  | conserved  | conserved |
| SMPDL3A | 0.09056802 | 1.56406242 | conserved  | conserved |
| SMPX    | 0          | 0          | conserved  | conserved |
| SMTN    | 0.14009035 | 0.01107081 | conserved  | conserved |
| SMTNL1  | 0.02544416 | 0          | conserved  | conserved |
| SMTNL2  | 0.0015338  | 0.00891738 | conserved  | conserved |
| SMU1    | 0.32971912 | 0.503632   | conserved  | conserved |
| SMURF1  | 1.26873774 | 0.11890675 | conserved  | conserved |
| SMURF2  | 1.77525304 | 0.19428264 | conserved  | conserved |
| SMYD1   | 0.0122941  | 0          | conserved  | conserved |
| SMYD2   | 0.15583128 | 0.33358652 | conserved  | conserved |
| SMYD3   | 7.67010655 | 0.2182599  | monkey-NSC | conserved |
| SMYD4   | 0.42053376 | 0.21113903 | conserved  | conserved |
| SMYD5   | 0.05575191 | 0.13470565 | conserved  | conserved |
| SNAI2   | 0.00507709 | 0.02936828 | conserved  | conserved |
| SNAI3   | 0.03420106 | 0          | conserved  | conserved |
| SNAP23  | 0.53145402 | 0.38797628 | conserved  | conserved |

|          |            |            |            |           |
|----------|------------|------------|------------|-----------|
| SNAP25   | 2.81872231 | 0.30294316 | conserved  | conserved |
| SNAP47   | 0.13394016 | 0.44293952 | conserved  | conserved |
| SNAP91   | 2.7630342  | 0.1123742  | monkey-NSC | conserved |
| SNAPC2   | 0.02418078 | 0.37138373 | conserved  | conserved |
| SNAPC3   | 0.45199909 | 0.34868655 | conserved  | conserved |
| SNAPC4   | 0.19790626 | 0.06799731 | conserved  | conserved |
| SNAPC5   | 0.04894653 | 1.0253405  | conserved  | conserved |
| SNAPIN   | 0.0535331  | 1.06118246 | conserved  | conserved |
| SNCA     | 0.55256061 | 0.82609301 | conserved  | conserved |
| SNCAIP   | 0.37670783 | 0.43806744 | conserved  | conserved |
| SNCB     | 0.18750001 | 0.17998602 | conserved  | conserved |
| SNCG     | 0.20918438 | 0.0245744  | conserved  | conserved |
| SND1     | 1.75668462 | 0.24156773 | conserved  | conserved |
| SNF8     | 0.15985773 | 0.78076486 | conserved  | conserved |
| SNIP1    | 0.10901781 | 0.1172557  | conserved  | conserved |
| SNN      | 0.15408102 | 0.83762053 | conserved  | conserved |
| SNRK     | 0.95478264 | 0.58319119 | conserved  | conserved |
| SNRNP200 | 0.36874929 | 0.22669768 | conserved  | conserved |
| SNRNP35  | 0.05681071 | 0.19371943 | conserved  | conserved |
| SNRNP40  | 0.35895961 | 0.68779816 | conserved  | conserved |
| SNRNP48  | 0.18840263 | 0.32854648 | conserved  | conserved |
| SNRPB    | 0.10117868 | 3.20119535 | mouse-RGL  | conserved |
| SNRPB2   | 0.23024011 | 1.22546574 | conserved  | conserved |
| SNRPD1   | 0.0903846  | 2.4215649  | mouse-RGL  | conserved |
| SNRPD3   | 0.42614424 | 2.03968583 | mouse-RGL  | conserved |
| SNTB1    | 2.26937447 | 0.03635543 | conserved  | conserved |
| SNTG1    | 0.77337153 | 0.0221705  | conserved  | conserved |
| SNTG2    | 0.53558938 | 0.05093744 | conserved  | conserved |
| SNTN     | 0.00544282 | 0          | conserved  | conserved |
| SNUPN    | 0.13813538 | 0.1148672  | conserved  | conserved |
| SNW1     | 0.41645518 | 0.95622327 | conserved  | conserved |
| SNX1     | 0.77795829 | 0.35776297 | conserved  | conserved |
| SNX10    | 0.28645607 | 0.39739236 | conserved  | conserved |
| SNX11    | 0.23047668 | 0.19854871 | conserved  | conserved |
| SNX12    | 0.21888289 | 0.34445038 | conserved  | conserved |
| SNX13    | 1.5093753  | 0.18837284 | conserved  | conserved |
| SNX14    | 2.05177288 | 0.14648839 | conserved  | conserved |
| SNX15    | 0.04844196 | 0.39660333 | conserved  | conserved |
| SNX16    | 0.09903528 | 0.25668787 | conserved  | conserved |
| SNX17    | 0.08353473 | 1.08508844 | mouse-RGL  | conserved |
| SNX19    | 0.27842473 | 0.12946009 | conserved  | conserved |

|         |            |            |            |           |
|---------|------------|------------|------------|-----------|
| SNX2    | 0.68258278 | 0.4430115  | conserved  | conserved |
| SNX22   | 0.00067681 | 0.00216973 | conserved  | conserved |
| SNX25   | 0.85936919 | 0.04586002 | conserved  | conserved |
| SNX27   | 0.96899356 | 0.58649901 | conserved  | conserved |
| SNX29   | 4.13306271 | 0.06268655 | conserved  | conserved |
| SNX3    | 0.64106752 | 3.98312789 | mouse-RGL  | conserved |
| SNX30   | 0.3260108  | 0.08224614 | conserved  | conserved |
| SNX31   | 0.05528677 | 0          | conserved  | conserved |
| SNX32   | 1.12608169 | 0.28927137 | conserved  | conserved |
| SNX33   | 0.05764042 | 0.08992947 | conserved  | conserved |
| SNX4    | 1.46886521 | 0.68325226 | conserved  | conserved |
| SNX5    | 0.24309043 | 1.44748876 | conserved  | conserved |
| SNX6    | 0.98256483 | 1.05366799 | conserved  | conserved |
| SNX8    | 0.27150794 | 0.13274573 | conserved  | conserved |
| SNX9    | 1.78799631 | 0.06326845 | conserved  | conserved |
| SOAT1   | 0.17717856 | 0.80467583 | conserved  | conserved |
| SOAT2   | 0.00098371 | 0          | conserved  | conserved |
| SOBP    | 3.46017838 | 0.33209727 | conserved  | conserved |
| SOCS2   | 0.03605841 | 2.17220052 | mouse-RGL  | conserved |
| SOCS5   | 0.25455576 | 0.10884011 | conserved  | conserved |
| SOCS6   | 0.06373086 | 0.52340723 | conserved  | conserved |
| SOCS7   | 0.5169301  | 0.31644517 | conserved  | conserved |
| SOD1    | 0.26657041 | 1.26030481 | conserved  | conserved |
| SOD2    | 0.22963254 | 1.44172329 | mouse-RGL  | conserved |
| SOD3    | 0          | 0.01114252 | conserved  | conserved |
| SOGA1   | 0.8378781  | 0.04885191 | monkey-NSC | conserved |
| SON     | 3.20591023 | 9.09169942 | conserved  | conserved |
| SORBS1  | 15.9084804 | 0.16149615 | conserved  | conserved |
| SORBS2  | 0.69201472 | 0.40586237 | conserved  | conserved |
| SORBS3  | 0.37937338 | 0.09740264 | conserved  | conserved |
| SORCS1  | 1.56388571 | 0.03007167 | monkey-NSC | conserved |
| SORCS3  | 0.72139638 | 0.01146568 | conserved  | conserved |
| SORD    | 0.39569433 | 0.1240607  | conserved  | conserved |
| SORL1   | 3.70290275 | 0.27897647 | monkey-NSC | conserved |
| SORT1   | 1.10028143 | 0.29018737 | conserved  | conserved |
| SOS2    | 1.60379904 | 0.18436731 | conserved  | conserved |
| SOSTDC1 | 0.00374836 | 0.02161289 | conserved  | conserved |
| SOX13   | 0.46573586 | 0.12338999 | conserved  | conserved |
| SOX30   | 0.11515951 | 0          | conserved  | conserved |
| SOX5    | 10.4206456 | 0.62162324 | conserved  | conserved |
| SOX6    | 2.88358229 | 0.98903027 | conserved  | conserved |

|         |            |            |            |           |
|---------|------------|------------|------------|-----------|
| SOX9    | 0.11860078 | 6.00038848 | conserved  | conserved |
| SP1     | 0.32125678 | 0.24204887 | conserved  | conserved |
| SP140   | 0.06105783 | 0          | conserved  | conserved |
| SP2     | 0.26629489 | 0.10814784 | conserved  | conserved |
| SP3     | 0.74568396 | 0.33440172 | conserved  | conserved |
| SP4     | 0.5047155  | 0.14588861 | conserved  | conserved |
| SP7     | 0.01783377 | 0          | conserved  | conserved |
| SP8     | 0.00119852 | 0.25287427 | conserved  | conserved |
| SP9     | 0          | 0          | conserved  | conserved |
| SPA17   | 0.04406926 | 0.21959872 | conserved  | conserved |
| SPACA1  | 0.0360819  | 0.00181086 | conserved  | conserved |
| SPACA3  | 0          | 0          | conserved  | conserved |
| SPACA6  | 0.36232725 | 0.14848805 | conserved  | conserved |
| SPACA7  | 0          | 0          | conserved  | conserved |
| SPAG1   | 0.20624142 | 0.08871589 | conserved  | conserved |
| SPAG16  | 1.77025602 | 0.02549105 | conserved  | conserved |
| SPAG17  | 0.03978681 | 0          | conserved  | conserved |
| SPAG4   | 0.00162988 | 0.03746244 | conserved  | conserved |
| SPAG7   | 0.22201617 | 0.9912426  | conserved  | conserved |
| SPAG8   | 0.01431918 | 0.03867052 | conserved  | conserved |
| SPAG9   | 4.47960248 | 1.29659294 | conserved  | conserved |
| SPARC   | 1.01906147 | 3.11288841 | conserved  | conserved |
| SPARCL1 | 16.4259335 | 5.62697862 | monkey-NSC | conserved |
| SPAST   | 1.36539141 | 0.36117868 | conserved  | conserved |
| SPATA1  | 0.33834861 | 0.14082953 | conserved  | conserved |
| SPATA16 | 0.03164485 | 0          | conserved  | conserved |
| SPATA17 | 0.0922116  | 0.0047291  | conserved  | conserved |
| SPATA18 | 0.0170403  | 0.00299754 | conserved  | conserved |
| SPATA19 | 0          | 0          | conserved  | conserved |
| SPATA2  | 0.17229323 | 0.38947662 | conserved  | conserved |
| SPATA21 | 0.06805019 | 0.00820745 | conserved  | conserved |
| SPATA25 | 0.00469058 | 0          | conserved  | conserved |
| SPATA2L | 0.05350892 | 0.02081915 | conserved  | conserved |
| SPATA3  | 0.00156976 | 0.07008143 | conserved  | conserved |
| SPATA32 | 0.01133606 | 0.00135972 | conserved  | conserved |
| SPATA4  | 0.00751094 | 0          | conserved  | conserved |
| SPATA5  | 1.75365393 | 0.07332777 | monkey-NSC | conserved |
| SPATA6  | 1.2956134  | 0.15846633 | conserved  | conserved |
| SPATA7  | 0.38585607 | 0.25255624 | conserved  | conserved |
| SPATA9  | 0.25452872 | 0.00619986 | conserved  | conserved |
| SPATC1  | 0.00065553 | 0          | conserved  | conserved |

|         |            |            |            |           |
|---------|------------|------------|------------|-----------|
| SPATS1  | 0.0694047  | 0.03771071 | conserved  | conserved |
| SPATS2  | 0.89906963 | 0.3104077  | conserved  | conserved |
| SPATS2L | 3.81264818 | 0.44095916 | conserved  | conserved |
| SPCS1   | 0.16402123 | 2.62232171 | mouse-RGL  | conserved |
| SPDEF   | 0.76111405 | 0          | conserved  | conserved |
| SPDL1   | 0.14365598 | 0.01082883 | conserved  | conserved |
| SPDYA   | 0.08509845 | 0.03858385 | conserved  | conserved |
| SPECC1  | 1.4808789  | 0.58187974 | conserved  | conserved |
| SPEF2   | 0.79677625 | 0.06096355 | conserved  | conserved |
| SPEM1   | 0.00306573 | 0.01164707 | conserved  | conserved |
| SPEN    | 2.16781268 | 0.28611154 | monkey-NSC | conserved |
| SPG11   | 1.23900737 | 0.05095164 | conserved  | conserved |
| SPG21   | 0.27634897 | 0.85979852 | conserved  | conserved |
| SPG7    | 0.68809882 | 0.20533717 | conserved  | conserved |
| SPHK1   | 0.04429361 | 0.00533042 | conserved  | conserved |
| SPHK2   | 0.19389525 | 0.13194726 | conserved  | conserved |
| SPHKAP  | 1.52772183 | 0.03454322 | monkey-NSC | conserved |
| SPIDR   | 2.64335749 | 0.10622424 | conserved  | conserved |
| SPIN1   | 1.86899641 | 0.68676996 | conserved  | conserved |
| SPIN4   | 0          | 0.04889986 | conserved  | conserved |
| SPINK1  | 0          | 0          | conserved  | conserved |
| SPINK5  | 0          | 0          | conserved  | conserved |
| SPINK7  | 0.00071629 | 0          | conserved  | conserved |
| SPINK8  | 0.03521358 | 0.00398434 | conserved  | conserved |
| SPINT2  | 0.1804623  | 0.07870723 | conserved  | conserved |
| SPINT3  | 0          | 0          | conserved  | conserved |
| SPINT4  | 0          | 0.00444142 | conserved  | conserved |
| SPN     | 0          | 0          | conserved  | conserved |
| SPNS1   | 0.10397311 | 0.32511931 | conserved  | conserved |
| SPNS3   | 0.00578878 | 0          | conserved  | conserved |
| SPOCD1  | 0.01997263 | 0          | conserved  | conserved |
| SPOCK1  | 2.40151212 | 0.021629   | conserved  | conserved |
| SPOCK2  | 0.43563104 | 0.4213475  | conserved  | conserved |
| SPOCK3  | 2.23956738 | 0.03940099 | monkey-NSC | conserved |
| SPON1   | 3.54956734 | 0.12434328 | conserved  | conserved |
| SPOPL   | 0.57287551 | 0.29494373 | conserved  | conserved |
| SPP1    | 0.16290322 | 0.00368823 | conserved  | conserved |
| SPP2    | 0          | 0.01091856 | conserved  | conserved |
| SPPL3   | 2.24537471 | 0.3570446  | conserved  | conserved |
| SPR     | 0.00121208 | 0.73298453 | conserved  | conserved |
| SPRED1  | 2.71556808 | 1.32977042 | conserved  | conserved |



|          |            |            |            |           |
|----------|------------|------------|------------|-----------|
| SPRED2   | 1.45435331 | 0.31729398 | conserved  | conserved |
| SPRED3   | 0.06357429 | 0.05701188 | conserved  | conserved |
| SPRTN    | 0.14447359 | 0          | conserved  | conserved |
| SPRY1    | 0.11011696 | 0.18253454 | conserved  | conserved |
| SPRY2    | 0.11360208 | 1.25276464 | conserved  | conserved |
| SPRY4    | 0.06917463 | 0.0406898  | conserved  | conserved |
| SPRYD3   | 0.12743382 | 0.16822815 | conserved  | conserved |
| SPRYD7   | 0.15320671 | 0.22735452 | conserved  | conserved |
| SPSB1    | 0.02973533 | 0.08912786 | conserved  | conserved |
| SPSB2    | 0.00087462 | 0.25148312 | conserved  | conserved |
| SPSB3    | 0.36478082 | 0.15541111 | conserved  | conserved |
| SPTA1    | 0.0011622  | 0          | conserved  | conserved |
| SPTAN1   | 3.42420029 | 0.48576506 | conserved  | conserved |
| SPTB     | 0.10513099 | 0.02009844 | conserved  | conserved |
| SPTBN1   | 8.85784099 | 1.07838223 | monkey-NSC | conserved |
| SPTBN2   | 0.19633362 | 0.14992283 | conserved  | conserved |
| SPTBN5   | 0.00793246 | 0          | conserved  | conserved |
| SPTLC1   | 0.43137703 | 0.25330359 | conserved  | conserved |
| SPTLC2   | 0.74234681 | 0.21690998 | conserved  | conserved |
| SPTLC3   | 0.05506052 | 0          | conserved  | conserved |
| SPTY2D1  | 0.12023835 | 0.21979893 | conserved  | conserved |
| SPX      | 0          | 0          | conserved  | conserved |
| SQLE     | 0.46840128 | 1.83936091 | mouse-RGL  | conserved |
| SQSTM1   | 0.59318163 | 0.57655896 | conserved  | conserved |
| SRBD1    | 0.99150051 | 0.1185967  | conserved  | conserved |
| SRC      | 0.08397301 | 0.38946936 | conserved  | conserved |
| SRCIN1   | 0.6549232  | 0.40142773 | conserved  | conserved |
| SRD5A1   | 0.09899172 | 0.1291599  | conserved  | conserved |
| SREBF1   | 0.26793637 | 0.37854909 | conserved  | conserved |
| SREBF2   | 2.85698823 | 0.67636524 | monkey-NSC | conserved |
| SREK1IP1 | 0.26544631 | 1.12688142 | conserved  | conserved |
| SRF      | 0.05070284 | 0.10642206 | conserved  | conserved |
| SRFBP1   | 0.23345594 | 0.07103311 | conserved  | conserved |
| SRGAP1   | 1.18178068 | 0.03293025 | conserved  | conserved |
| SRGN     | 0.01149074 | 0.01076    | conserved  | conserved |
| SRI      | 0.53084879 | 1.43069224 | mouse-RGL  | conserved |
| SRP68    | 0.26246784 | 0.30494766 | conserved  | conserved |
| SRP72    | 0.30736594 | 0.7917065  | conserved  | conserved |
| SRP9     | 0.15459461 | 2.32529207 | mouse-RGL  | conserved |
| SRPK2    | 2.90728158 | 1.15662808 | conserved  | conserved |
| SRPK3    | 0.02209824 | 0.00788073 | conserved  | conserved |

|         |            |            |           |           |
|---------|------------|------------|-----------|-----------|
| SRPRB   | 0.0958867  | 0.3923568  | conserved | conserved |
| SRPX    | 0.38658077 | 0.038535   | conserved | conserved |
| SRRD    | 0.04820567 | 0.30472266 | conserved | conserved |
| SRRM1   | 0.85855633 | 1.94369803 | conserved | conserved |
| SRRM2   | 1.20793504 | 4.4868015  | mouse-RGL | conserved |
| SRRM4   | 0.4473552  | 0.11476291 | conserved | conserved |
| SRRT    | 0.30626362 | 0.46079644 | conserved | conserved |
| SRSF10  | 0.27792957 | 1.87270838 | mouse-RGL | conserved |
| SRSF11  | 0.81240389 | 2.36841831 | conserved | conserved |
| SRSF12  | 0.35591286 | 0.06754519 | conserved | conserved |
| SRSF2   | 0.07709642 | 3.87906315 | mouse-RGL | conserved |
| SRSF4   | 1.27076448 | 0.50621743 | conserved | conserved |
| SRSF6   | 0.21715055 | 2.48575857 | conserved | conserved |
| SRSF9   | 0.2868528  | 0.92179948 | conserved | conserved |
| SRXN1   | 0.02945016 | 0.0945467  | conserved | conserved |
| SS18    | 0.72973578 | 0.62879954 | conserved | conserved |
| SS18L1  | 0.4503456  | 0.15793149 | conserved | conserved |
| SSBP1   | 0.15089491 | 1.38466972 | mouse-RGL | conserved |
| SSBP3   | 1.34663032 | 0.72365809 | conserved | conserved |
| SSBP4   | 0.1930479  | 0.83368421 | conserved | conserved |
| SSC5D   | 0.07066033 | 0.01216204 | conserved | conserved |
| SSH1    | 0.64252211 | 0.19977073 | conserved | conserved |
| SSH2    | 3.07890475 | 0.22166953 | conserved | conserved |
| SSH3    | 0.10712135 | 0.08081187 | conserved | conserved |
| SSMEM1  | 0.02714014 | 0.00396223 | conserved | conserved |
| SSPN    | 0.7329253  | 0.09962543 | conserved | conserved |
| SSR1    | 0.94294155 | 1.48645405 | conserved | conserved |
| SSR2    | 0.09812829 | 1.43309529 | mouse-RGL | conserved |
| SSR3    | 0.12237861 | 2.72227803 | conserved | conserved |
| SSR4    | 0.04671665 | 2.06889373 | conserved | conserved |
| SSRP1   | 0.14022903 | 1.22965445 | conserved | conserved |
| SST     | 0.1386072  | 0.04971644 | conserved | conserved |
| SSTR1   | 0          | 0.02632204 | conserved | conserved |
| SSTR2   | 0.02271771 | 0.08123367 | conserved | conserved |
| SSTR4   | 0          | 0          | conserved | conserved |
| SSTR5   | 0.00191011 | 0          | conserved | conserved |
| SSX2IP  | 0.46892749 | 0.16894405 | conserved | conserved |
| ST14    | 0.00924821 | 0.01099735 | conserved | conserved |
| ST18    | 0.44940272 | 0.01028755 | conserved | conserved |
| ST3GAL1 | 0.13452091 | 0.06173217 | conserved | conserved |
| ST3GAL2 | 0.20395086 | 0.14835133 | conserved | conserved |

|            |            |            |            |           |
|------------|------------|------------|------------|-----------|
| ST3GAL3    | 2.93285989 | 0.13390495 | conserved  | conserved |
| ST3GAL4    | 0.21289263 | 0.83073017 | conserved  | conserved |
| ST3GAL5    | 1.15787814 | 0.45968059 | conserved  | conserved |
| ST3GAL6    | 0.36181807 | 0.11210581 | conserved  | conserved |
| ST6GAL1    | 0.28439219 | 0.09501377 | conserved  | conserved |
| ST6GALNAC1 | 0.02140912 | 0          | conserved  | conserved |
| ST6GALNAC2 | 0.05918009 | 0.0771131  | conserved  | conserved |
| ST6GALNAC3 | 2.53862416 | 0.16862359 | conserved  | conserved |
| ST6GALNAC5 | 10.5543679 | 1.11540311 | monkey-NSC | conserved |
| ST7        | 2.61895479 | 0.38946187 | conserved  | conserved |
| ST7L       | 2.41183951 | 0.20409858 | conserved  | conserved |
| ST8SIA1    | 0.72542104 | 0.11118476 | conserved  | conserved |
| ST8SIA2    | 0.03714754 | 0.24500521 | conserved  | conserved |
| ST8SIA3    | 0.02928402 | 0.06900427 | conserved  | conserved |
| ST8SIA4    | 0.16439611 | 0.04829059 | conserved  | conserved |
| ST8SIA5    | 0.3466109  | 0.01812687 | conserved  | conserved |
| STAB1      | 0.03926428 | 0.00281196 | conserved  | conserved |
| STAB2      | 0.01955161 | 0.00223928 | conserved  | conserved |
| STAC       | 0.08531802 | 0          | conserved  | conserved |
| STAC2      | 0.2440486  | 0          | conserved  | conserved |
| STAG1      | 2.32927018 | 0.68489842 | conserved  | conserved |
| STAG2      | 0.72604417 | 0.50894745 | conserved  | conserved |
| STAG3      | 0.10117989 | 0.01132821 | conserved  | conserved |
| STAM       | 0.54345845 | 0.34068301 | conserved  | conserved |
| STAM2      | 0.58315134 | 0.23602161 | conserved  | conserved |
| STAMBP     | 0.31426376 | 0.19535836 | conserved  | conserved |
| STAMBPL1   | 0.24283051 | 0.00971818 | conserved  | conserved |
| STAP1      | 0.02422487 | 0.01618617 | conserved  | conserved |
| STAP2      | 0.0602948  | 0.00374955 | conserved  | conserved |
| STARD10    | 0.13064287 | 0.17731629 | conserved  | conserved |
| STARD13    | 0.96954855 | 0.08971649 | conserved  | conserved |
| STARD3NL   | 0.29577258 | 1.25748058 | conserved  | conserved |
| STARD4     | 0.11380213 | 0.31405387 | conserved  | conserved |
| STARD5     | 0.00460435 | 0.1070342  | conserved  | conserved |
| STARD6     | 0.07959768 | 0.03642748 | conserved  | conserved |
| STARD7     | 0.39200322 | 0.98637268 | mouse-RGL  | conserved |
| STARD8     | 0.00574918 | 0.08598989 | conserved  | conserved |
| STAT1      | 0.23485119 | 0.05356284 | conserved  | conserved |
| STAT3      | 1.24534459 | 0.67909598 | conserved  | conserved |
| STAT4      | 0.26178576 | 0          | conserved  | conserved |
| STAT5A     | 0.07781845 | 0.03849356 | conserved  | conserved |

|         |            |            |            |                      |
|---------|------------|------------|------------|----------------------|
| STAT5B  | 0.29436172 | 0.09507426 | conserved  | conserved            |
| STAT6   | 0.03069804 | 0.00329745 | conserved  | conserved            |
| STAU1   | 1.50544638 | 0.51759591 | conserved  | conserved            |
| STC1    | 0.00448351 | 0.02046569 | conserved  | conserved            |
| STC2    | 0.00570804 | 0.01541267 | conserved  | conserved            |
| STEAP2  | 0.10646968 | 0.12592307 | conserved  | conserved            |
| STEAP3  | 0.05250909 | 0.0244301  | conserved  | conserved            |
| STEAP4  | 0.07066904 | 0          | conserved  | conserved            |
| STIL    | 0.12210206 | 0.02018056 | conserved  | conserved            |
| STIM1   | 2.23093007 | 0.07587182 | monkey-NSC | conserved            |
| STIM2   | 0.92064508 | 0.18273906 | conserved  | conserved            |
| STIP1   | 0.27713545 | 0.46441876 | conserved  | conserved            |
| STK10   | 0.46802047 | 0.01644528 | conserved  | conserved            |
| STK11IP | 0.29335582 | 0.04231382 | conserved  | conserved            |
| STK16   | 0.06293372 | 0.89161122 | conserved  | conserved            |
| STK19   | 0.20130905 | 0.47586867 | conserved  | conserved            |
| STK24   | 0.65385879 | 0.10981418 | conserved  | conserved            |
| STK25   | 0.29093323 | 0.42411646 | conserved  | conserved            |
| STK26   | 0.01356309 | 0          | conserved  | conserved            |
| STK3    | 1.76786437 | 0.24867556 | conserved  | conserved            |
| STK31   | 0.39598785 | 0          | conserved  | conserved            |
| STK32A  | 0.18287629 | 0.00958321 | conserved  | conserved            |
| STK32B  | 0.27465236 | 0.03395577 | conserved  | conserved            |
| STK32C  | 0.1393326  | 0.07237645 | conserved  | conserved            |
| STK33   | 0.97701996 | 0          | monkey-NSC | monkey-NSC1-enriched |
| STK35   | 0.41406945 | 0.10405386 | conserved  | conserved            |
| STK36   | 0.11331959 | 0.0697175  | conserved  | conserved            |
| STK38   | 0.6011816  | 0.47851287 | conserved  | conserved            |
| STK38L  | 0.88565165 | 0.2213023  | conserved  | conserved            |
| STK39   | 1.27448809 | 0.15321203 | conserved  | conserved            |
| STK4    | 0.43399165 | 0.21109761 | conserved  | conserved            |
| STK40   | 0.25576682 | 0.12414651 | conserved  | conserved            |
| STKLD1  | 0.17104953 | 0          | conserved  | conserved            |
| STMN1   | 0.49140622 | 5.81105051 | mouse-RGL  | conserved            |
| STMN2   | 0.36368157 | 0.70538338 | conserved  | conserved            |
| STMN3   | 0.33386168 | 1.10023904 | mouse-RGL  | conserved            |
| STMN4   | 0.31789514 | 0.48469649 | conserved  | conserved            |
| STMND1  | 0.00719182 | 0          | conserved  | conserved            |
| STOML1  | 0.06911208 | 0.3198466  | conserved  | conserved            |
| STOML2  | 0.10772884 | 1.0179154  | mouse-RGL  | conserved            |
| STOML3  | 0.00090465 | 0.00392712 | conserved  | conserved            |

|         |            |            |            |           |
|---------|------------|------------|------------|-----------|
| STON2   | 3.87495486 | 0.05712288 | monkey-NSC | conserved |
| STOX1   | 0.02738872 | 0.10430561 | conserved  | conserved |
| STOX2   | 1.5206923  | 1.10979228 | conserved  | conserved |
| STPG1   | 0.01546333 | 0.00256096 | conserved  | conserved |
| STPG2   | 0.37993592 | 0          | conserved  | conserved |
| STRA6   | 0.00173739 | 0          | conserved  | conserved |
| STRA8   | 0.00139998 | 0          | conserved  | conserved |
| STRADA  | 1.44813616 | 0.15643053 | conserved  | conserved |
| STRADB  | 0.27165573 | 0.29819274 | conserved  | conserved |
| STRAP   | 0.20965048 | 1.80616918 | mouse-RGL  | conserved |
| STRBP   | 1.13252139 | 0.5958436  | conserved  | conserved |
| STRC    | 0.31942712 | 0          | conserved  | conserved |
| STRIP1  | 0.39124351 | 0.24610819 | conserved  | conserved |
| STRIP2  | 0.28608882 | 0.04397188 | conserved  | conserved |
| STRN    | 0.98871506 | 0.09836225 | conserved  | conserved |
| STRN3   | 2.6724191  | 0.83347909 | conserved  | conserved |
| STRN4   | 0.16784872 | 0.52365362 | conserved  | conserved |
| STT3A   | 0.26735345 | 0.3797172  | conserved  | conserved |
| STT3B   | 0.95475632 | 0.89919134 | conserved  | conserved |
| STUB1   | 0.21004321 | 2.32874554 | conserved  | conserved |
| STX11   | 0.00622014 | 0.00220774 | conserved  | conserved |
| STX17   | 0.58891743 | 0.20332549 | conserved  | conserved |
| STX18   | 1.418115   | 0.2515028  | conserved  | conserved |
| STX19   | 0.03086866 | 0          | conserved  | conserved |
| STX1A   | 0.12790964 | 0.05987424 | conserved  | conserved |
| STX1B   | 0.29328439 | 0.20313649 | conserved  | conserved |
| STX2    | 0.32983506 | 0.10657528 | conserved  | conserved |
| STX3    | 0.21886887 | 0.09680166 | conserved  | conserved |
| STX6    | 0.76815303 | 1.19483942 | mouse-RGL  | conserved |
| STX7    | 0.59022831 | 0.91004325 | conserved  | conserved |
| STX8    | 2.12097229 | 0.56765053 | conserved  | conserved |
| STXBP1  | 1.28739586 | 0.33996599 | conserved  | conserved |
| STXBP2  | 0.00126231 | 0.04211578 | conserved  | conserved |
| STXBP3  | 0.7343485  | 0.20291101 | conserved  | conserved |
| STXBP4  | 0.89072594 | 0.20420252 | conserved  | conserved |
| STXBP5  | 5.12729893 | 0.0896     | conserved  | conserved |
| STXBP5L | 9.79034212 | 0.0306906  | monkey-NSC | conserved |
| STYK1   | 0.16942271 | 0.00181086 | conserved  | conserved |
| SUB1    | 0.6430236  | 7.58700927 | mouse-RGL  | conserved |
| SUCLG1  | 0.51924492 | 1.31550677 | conserved  | conserved |
| SUCNR1  | 0          | 0          | conserved  | conserved |

|         |            |            |            |           |
|---------|------------|------------|------------|-----------|
| SUCO    | 0.86132458 | 0.21265901 | conserved  | conserved |
| SUFU    | 1.74344128 | 0.10244831 | conserved  | conserved |
| SUGCT   | 2.26608339 | 0.00421103 | monkey-NSC | conserved |
| SUGP2   | 1.33877891 | 0.22189657 | conserved  | conserved |
| SULF1   | 0.11629458 | 0.03667245 | conserved  | conserved |
| SULF2   | 0.25333258 | 0.15534177 | conserved  | conserved |
| SULT1B1 | 0.01323928 | 0          | conserved  | conserved |
| SULT1C2 | 0.4302246  | 0          | conserved  | conserved |
| SULT2B1 | 0.03143535 | 0.00537961 | conserved  | conserved |
| SULT6B1 | 0.00568316 | 0.01351097 | conserved  | conserved |
| SUMF1   | 0.90640601 | 0.21505126 | conserved  | conserved |
| SUMO3   | 0.10058436 | 1.88597122 | mouse-RGL  | conserved |
| SUN1    | 0.96864226 | 0.2106085  | conserved  | conserved |
| SUN2    | 0.22841313 | 0.1076299  | conserved  | conserved |
| SUN3    | 0.00092402 | 0.02068895 | conserved  | conserved |
| SUN5    | 0.0021668  | 0          | conserved  | conserved |
| SUPT7L  | 0.23009382 | 0.23117616 | conserved  | conserved |
| SURF1   | 0.03390062 | 0.51380587 | conserved  | conserved |
| SURF2   | 0.04375423 | 0.39007106 | conserved  | conserved |
| SURF4   | 0.52390925 | 0.45316097 | conserved  | conserved |
| SUSD1   | 0.20590284 | 0          | conserved  | conserved |
| SUSD2   | 0.00273682 | 0.00248184 | conserved  | conserved |
| SUSD4   | 1.0656356  | 0.03928952 | conserved  | conserved |
| SUSD5   | 0.06088675 | 0.01797027 | conserved  | conserved |
| SUSD6   | 1.61855903 | 0.1651932  | monkey-NSC | conserved |
| SUV39H1 | 0.02327169 | 0.10621682 | conserved  | conserved |
| SUZ12   | 1.59875407 | 0.29310945 | conserved  | conserved |
| SV2A    | 0.17558653 | 0.08890896 | conserved  | conserved |
| SV2B    | 0.38656339 | 0.02520438 | conserved  | conserved |
| SV2C    | 0.07044951 | 0.10119215 | conserved  | conserved |
| SVBP    | 0.0532979  | 1.98685778 | mouse-RGL  | conserved |
| SVEP1   | 0.24593554 | 0          | conserved  | conserved |
| SVIP    | 0.04249767 | 0.4730789  | conserved  | conserved |
| SVOP    | 0.41109647 | 0.03484597 | conserved  | conserved |
| SVOPL   | 0.01248457 | 0          | conserved  | conserved |
| SWAP70  | 1.16637449 | 0.1697747  | conserved  | conserved |
| SWSAP1  | 0.00623124 | 0.13658087 | conserved  | conserved |
| SWT1    | 2.51698258 | 0.4116258  | conserved  | conserved |
| SYAP1   | 0.23649582 | 0.25384979 | conserved  | conserved |
| SYBU    | 2.33744245 | 0.53322559 | conserved  | conserved |
| SYCE1L  | 0.05116963 | 0          | conserved  | conserved |

|          |            |            |            |           |
|----------|------------|------------|------------|-----------|
| SYCP1    | 0.00578501 | 0          | conserved  | conserved |
| SYCP2    | 0.23790608 | 0.01153846 | conserved  | conserved |
| SYCP2L   | 0.01247133 | 0          | conserved  | conserved |
| SYDE1    | 0.01014913 | 0.10254012 | conserved  | conserved |
| SYF2     | 0.13731248 | 1.05816865 | mouse-RGL  | conserved |
| SYK      | 0.01839919 | 0.00775707 | conserved  | conserved |
| SYN2     | 2.30921473 | 0.55456276 | conserved  | conserved |
| SYN3     | 0.85296476 | 0.04898659 | conserved  | conserved |
| SYNC     | 0.37295696 | 0          | conserved  | conserved |
| SYNDIG1  | 0.38927732 | 0.02285373 | conserved  | conserved |
| SYNDIG1L | 0.00553086 | 0.01013066 | conserved  | conserved |
| SYNE1    | 17.9685845 | 0.07513533 | monkey-NSC | conserved |
| SYNE2    | 0.43992928 | 0.25170033 | conserved  | conserved |
| SYNE3    | 0.26525117 | 0          | conserved  | conserved |
| SYNE4    | 0          | 0.01219117 | conserved  | conserved |
| SYNGAP1  | 0.45572653 | 0.07161132 | conserved  | conserved |
| SYNGR4   | 0.00978769 | 0          | conserved  | conserved |
| SYNJ1    | 1.23338122 | 0.38918366 | conserved  | conserved |
| SYNJ2    | 0.52325979 | 0.01708649 | conserved  | conserved |
| SYNM     | 0.46426952 | 0.05628725 | conserved  | conserved |
| SYNPO2   | 1.33118381 | 0.02459827 | monkey-NSC | conserved |
| SYNPO2L  | 0.05522306 | 0          | conserved  | conserved |
| SYNPR    | 1.72251954 | 0.13134411 | conserved  | conserved |
| SYNRG    | 0.42988365 | 0.32721097 | conserved  | conserved |
| SYP      | 0.52252321 | 0.11699528 | conserved  | conserved |
| SYPL2    | 0.12233111 | 0.03144828 | conserved  | conserved |
| SYT1     | 8.90508408 | 0.11978319 | conserved  | conserved |
| SYT10    | 0.11700497 | 0.01551386 | conserved  | conserved |
| SYT11    | 0.81627004 | 8.7558917  | conserved  | conserved |
| SYT12    | 0.0626777  | 0.01890924 | conserved  | conserved |
| SYT13    | 0.13395283 | 0.03011614 | conserved  | conserved |
| SYT14    | 3.11099242 | 0.04380107 | conserved  | conserved |
| SYT17    | 1.68659614 | 0.04312473 | monkey-NSC | conserved |
| SYT2     | 0.1057388  | 0.00868275 | conserved  | conserved |
| SYT4     | 0.24117603 | 0.11104639 | conserved  | conserved |
| SYT5     | 0.23521765 | 0.11153088 | conserved  | conserved |
| SYT6     | 0.00763103 | 0.00182916 | conserved  | conserved |
| SYT7     | 0.21389112 | 0.2487095  | conserved  | conserved |
| SYT8     | 0          | 0          | conserved  | conserved |
| SYT9     | 0.12574943 | 0.04434313 | conserved  | conserved |
| SYTL1    | 0.00687385 | 0.00972071 | conserved  | conserved |

|        |            |            |           |           |
|--------|------------|------------|-----------|-----------|
| SYTL5  | 0.06185127 | 0          | conserved | conserved |
| SZRD1  | 1.02268164 | 0.4941811  | conserved | conserved |
| SZT2   | 0.76831576 | 0.09626809 | conserved | conserved |
| TAB1   | 0.59984285 | 0.16449345 | conserved | conserved |
| TAB2   | 3.36493409 | 0.60877352 | conserved | conserved |
| TAB3   | 0.15837541 | 0.05841653 | conserved | conserved |
| TAC1   | 0.02459791 | 0          | conserved | conserved |
| TACC2  | 2.07391933 | 0.36074214 | conserved | conserved |
| TACC3  | 0.02308808 | 0.08266503 | conserved | conserved |
| TACR1  | 0.15937536 | 0.00205787 | conserved | conserved |
| TACR2  | 0.01405663 | 0          | conserved | conserved |
| TADA1  | 0.27481155 | 0.46673654 | conserved | conserved |
| TADA2A | 0.47472512 | 0.21339469 | conserved | conserved |
| TADA2B | 0.12277757 | 0.10622278 | conserved | conserved |
| TADA3  | 0.15276604 | 0.27596114 | conserved | conserved |
| TAF12  | 0.38384431 | 0.44390147 | conserved | conserved |
| TAF13  | 0.2385756  | 1.01012357 | conserved | conserved |
| TAF15  | 2.98933233 | 0.28787276 | conserved | conserved |
| TAF1A  | 0.11096663 | 0.0897888  | conserved | conserved |
| TAF1B  | 0.69615333 | 0.1918723  | conserved | conserved |
| TAF1C  | 0.12084399 | 0.05100373 | conserved | conserved |
| TAF1D  | 0.67793801 | 0.91109451 | conserved | conserved |
| TAF2   | 0.77779053 | 0.28518474 | conserved | conserved |
| TAF3   | 1.32347398 | 0.26243259 | conserved | conserved |
| TAF4B  | 0.09449965 | 0.03231868 | conserved | conserved |
| TAF5   | 0.05166826 | 0.027947   | conserved | conserved |
| TAF5L  | 0.27172869 | 0.15690202 | conserved | conserved |
| TAF6   | 0.07141396 | 0.42912919 | conserved | conserved |
| TAF6L  | 0.26739975 | 0.40532543 | conserved | conserved |
| TAF8   | 0.39264822 | 0.15146348 | conserved | conserved |
| TAF9B  | 0.0736713  | 0.2185303  | conserved | conserved |
| TAGLN2 | 0.0103269  | 0.25788654 | conserved | conserved |
| TAGLN3 | 0.10906518 | 1.73967737 | conserved | conserved |
| TALDO1 | 0.2077173  | 1.45999419 | mouse-RGL | conserved |
| TAMM41 | 0.32760307 | 0.09016665 | conserved | conserved |
| TANC1  | 1.18257588 | 0.27567652 | conserved | conserved |
| TANC2  | 5.32445229 | 0.40578141 | conserved | conserved |
| TANGO2 | 0.50047621 | 0.19548033 | conserved | conserved |
| TANGO6 | 1.90732925 | 0.04941348 | conserved | conserved |
| TANK   | 0.71342154 | 0.40864032 | conserved | conserved |
| TAOK1  | 2.43342257 | 0.98796915 | conserved | conserved |



|          |            |            |            |           |
|----------|------------|------------|------------|-----------|
| TAOK2    | 0.39073231 | 0.28860336 | conserved  | conserved |
| TAOK3    | 3.57578999 | 0.39722423 | conserved  | conserved |
| TAPBP    | 0.15421384 | 0.37612507 | conserved  | conserved |
| TAPT1    | 0.68423017 | 0.13469849 | conserved  | conserved |
| TARM1    | 0.01328057 | 0          | conserved  | conserved |
| TARS2    | 0.22218634 | 0.1171306  | conserved  | conserved |
| TAS1R1   | 0.07259054 | 0          | conserved  | conserved |
| TAS1R2   | 0.00100731 | 0          | conserved  | conserved |
| TASP1    | 1.26167306 | 0.14973764 | conserved  | conserved |
| TAT      | 0.00128476 | 0          | conserved  | conserved |
| TATDN1   | 1.28395022 | 0.12391829 | conserved  | conserved |
| TATDN3   | 0.18711501 | 0.08695229 | conserved  | conserved |
| TAX1BP1  | 1.57226168 | 0.9515347  | conserved  | conserved |
| TAX1BP3  | 0.13142685 | 0.34841367 | conserved  | conserved |
| TAZ      | 0.22843619 | 0.68081408 | conserved  | conserved |
| TBATA    | 0          | 0.0048669  | conserved  | conserved |
| TBC1D10B | 0.13840266 | 0.16759144 | conserved  | conserved |
| TBC1D10C | 0.00253249 | 0.00356942 | conserved  | conserved |
| TBC1D13  | 0.33226592 | 0.08068897 | conserved  | conserved |
| TBC1D14  | 0.81618362 | 0.23352094 | conserved  | conserved |
| TBC1D15  | 0.77932283 | 0.20881757 | conserved  | conserved |
| TBC1D16  | 0.52182207 | 0.28975674 | conserved  | conserved |
| TBC1D17  | 0.28304199 | 0.41745442 | conserved  | conserved |
| TBC1D19  | 1.42483904 | 0.34618646 | conserved  | conserved |
| TBC1D2   | 0.11311309 | 0.01166166 | conserved  | conserved |
| TBC1D20  | 0.16354118 | 0.22564403 | conserved  | conserved |
| TBC1D21  | 0.00686536 | 0          | conserved  | conserved |
| TBC1D22A | 2.30712676 | 0.10118541 | conserved  | conserved |
| TBC1D22B | 0.44978577 | 0.11036083 | conserved  | conserved |
| TBC1D23  | 1.34347969 | 0.19253818 | conserved  | conserved |
| TBC1D25  | 0.24198755 | 0.02552718 | conserved  | conserved |
| TBC1D2B  | 1.08541512 | 0.0409378  | conserved  | conserved |
| TBC1D32  | 0.88179691 | 0.08692577 | conserved  | conserved |
| TBC1D4   | 0.41783445 | 0.33443266 | conserved  | conserved |
| TBC1D5   | 4.044389   | 0.0973575  | monkey-NSC | conserved |
| TBC1D7   | 0.13794476 | 0.39121873 | conserved  | conserved |
| TBC1D8   | 0.43441396 | 0.04059179 | conserved  | conserved |
| TBC1D8B  | 0.08682462 | 0.02491984 | conserved  | conserved |
| TBC1D9   | 0.2352901  | 0.11346026 | conserved  | conserved |
| TBC1D9B  | 0.72212219 | 0.21086063 | conserved  | conserved |
| TBCC     | 0.00274705 | 0.34294799 | conserved  | conserved |

|         |            |            |           |           |
|---------|------------|------------|-----------|-----------|
| TBCCD1  | 0.10187401 | 0.13461461 | conserved | conserved |
| TBCD    | 0.8322747  | 0.09631165 | conserved | conserved |
| TBCK    | 1.48517538 | 0.38378678 | conserved | conserved |
| TBKBP1  | 0.10176079 | 0.19330245 | conserved | conserved |
| TBL1XR1 | 1.79312214 | 0.51135806 | conserved | conserved |
| TBL2    | 0.04966969 | 0.19770543 | conserved | conserved |
| TBL3    | 0.07755092 | 0.25401985 | conserved | conserved |
| TBP     | 0.15966013 | 0.13100049 | conserved | conserved |
| TBPL1   | 0.42606441 | 0.83882483 | conserved | conserved |
| TBPL2   | 0.00573356 | 0          | conserved | conserved |
| TBRG1   | 0.25134199 | 0.75086404 | conserved | conserved |
| TBRG4   | 0.11033225 | 0.09046014 | conserved | conserved |
| TBX1    | 0.00422755 | 0          | conserved | conserved |
| TBX15   | 0.0078575  | 0          | conserved | conserved |
| TBX18   | 0.00289745 | 0.00327811 | conserved | conserved |
| TBX20   | 0.00514881 | 0          | conserved | conserved |
| TBX21   | 0          | 0.01223877 | conserved | conserved |
| TBX22   | 0          | 0          | conserved | conserved |
| TBX3    | 0.00114549 | 0          | conserved | conserved |
| TBX4    | 0          | 0          | conserved | conserved |
| TBX5    | 0          | 0.00271457 | conserved | conserved |
| TBX6    | 0.0629374  | 0.0070848  | conserved | conserved |
| TBXAS1  | 0.03448363 | 0.00393916 | conserved | conserved |
| TC2N    | 0.27349476 | 0          | conserved | conserved |
| TCAF1   | 0.74021855 | 0.60529097 | conserved | conserved |
| TCAIM   | 1.12605961 | 0.11618182 | conserved | conserved |
| TCEA1   | 0.62608232 | 0.86553832 | conserved | conserved |
| TCEA3   | 0.14504516 | 0.0189718  | conserved | conserved |
| TCEAL1  | 0.04466976 | 0.5521536  | conserved | conserved |
| TCEAL7  | 0.025115   | 0.0045195  | conserved | conserved |
| TCEAL8  | 0.03146993 | 2.64364942 | mouse-RGL | conserved |
| TCEANC  | 0.04466704 | 0.04955499 | conserved | conserved |
| TCEANC2 | 0.26265151 | 0.20887055 | conserved | conserved |
| TCERG1  | 1.25788812 | 0.42743315 | conserved | conserved |
| TCERG1L | 0.04895543 | 0.01814425 | conserved | conserved |
| TCF12   | 6.38344637 | 0.8923788  | conserved | conserved |
| TCF15   | 0.00493605 | 0.01767577 | conserved | conserved |
| TCF19   | 0.00541867 | 0.18044989 | conserved | conserved |
| TCF21   | 0.0018382  | 0          | conserved | conserved |
| TCF23   | 0          | 0          | conserved | conserved |
| TCF24   | 0.0039416  | 0.01084134 | conserved | conserved |

|         |            |            |            |           |
|---------|------------|------------|------------|-----------|
| TCF25   | 1.34266787 | 1.86462747 | conserved  | conserved |
| TCF3    | 0.51125759 | 1.38263212 | mouse-RGL  | conserved |
| TCF4    | 13.5629153 | 14.3527966 | conserved  | conserved |
| TCF7L2  | 7.84929331 | 0.9671354  | conserved  | conserved |
| TCIRG1  | 0.01474645 | 0.11178756 | conserved  | conserved |
| TCN2    | 0.4012663  | 0.14939633 | conserved  | conserved |
| TCOF1   | 0.21209444 | 0.27573114 | conserved  | conserved |
| TCP11   | 0.14711191 | 0.00334117 | conserved  | conserved |
| TCP11L1 | 0.42040444 | 0.24503154 | conserved  | conserved |
| TCP11L2 | 0.2931008  | 0.29872524 | conserved  | conserved |
| TCTE1   | 0.02035697 | 0          | conserved  | conserved |
| TCTN1   | 0.43708443 | 0.11705434 | conserved  | conserved |
| TCTN3   | 0.19064251 | 0.11165607 | conserved  | conserved |
| TDG     | 0.29386707 | 0.59356563 | conserved  | conserved |
| TDO2    | 0          | 0.004266   | conserved  | conserved |
| TDP1    | 0.31469078 | 0.16957927 | conserved  | conserved |
| TDP2    | 0.34031486 | 0.46411474 | conserved  | conserved |
| TDRD1   | 0.01475866 | 0          | conserved  | conserved |
| TDRD3   | 2.10209293 | 0.21895128 | conserved  | conserved |
| TDRD5   | 0.03439136 | 0          | conserved  | conserved |
| TDRD6   | 0.03181307 | 0.00704178 | conserved  | conserved |
| TDRD7   | 0.33590992 | 0.07159556 | conserved  | conserved |
| TDRD9   | 0.02753043 | 0          | conserved  | conserved |
| TDRKH   | 0.14192126 | 0.50457253 | conserved  | conserved |
| TDRP    | 0.32437141 | 0.04152802 | conserved  | conserved |
| TEAD1   | 2.45191649 | 0.91983265 | conserved  | conserved |
| TEAD2   | 0.11640235 | 0.88064511 | conserved  | conserved |
| TEAD3   | 0.12238202 | 0.06881112 | conserved  | conserved |
| TEC     | 0.00874834 | 0.00866451 | conserved  | conserved |
| TECPR2  | 4.82630771 | 0.18029338 | monkey-NSC | conserved |
| TECRL   | 0.01055274 | 0          | conserved  | conserved |
| TECTB   | 0.00820622 | 0.01190975 | conserved  | conserved |
| TEF     | 0.97285406 | 0.8448987  | conserved  | conserved |
| TEK     | 0.21894041 | 0.00379606 | conserved  | conserved |
| TEKT1   | 0.03334363 | 0.12731213 | conserved  | conserved |
| TEKT2   | 0.00333305 | 0.0343842  | conserved  | conserved |
| TEKT3   | 0.04309127 | 0          | conserved  | conserved |
| TEKT5   | 0.21953032 | 0.09492432 | conserved  | conserved |
| TENM1   | 0.61133454 | 0.01510702 | conserved  | conserved |
| TENM2   | 9.37303289 | 0.1704078  | conserved  | conserved |
| TEP1    | 0.43021472 | 0.01704584 | conserved  | conserved |

|         |            |            |            |                      |
|---------|------------|------------|------------|----------------------|
| TERF1   | 1.48391597 | 0.1566894  | conserved  | conserved            |
| TERF2   | 0.5271968  | 0.17745246 | conserved  | conserved            |
| TERF2IP | 0.49274877 | 0.37454835 | conserved  | conserved            |
| TERT    | 0.00516823 | 0          | conserved  | conserved            |
| TESC    | 0.12894303 | 0.63966629 | conserved  | conserved            |
| TESK1   | 0.10973665 | 0.14424821 | conserved  | conserved            |
| TESK2   | 1.9582234  | 0.038245   | monkey-NSC | monkey-NSC1-enriched |
| TET1    | 2.33534886 | 0.41502324 | conserved  | conserved            |
| TET2    | 1.21061922 | 0.23326612 | conserved  | conserved            |
| TET3    | 1.16685031 | 0.46970466 | conserved  | conserved            |
| TEX10   | 0.3979961  | 0.14059723 | conserved  | conserved            |
| TEX101  | 0          | 0          | conserved  | conserved            |
| TEX11   | 0.03835783 | 0          | conserved  | conserved            |
| TEX12   | 0          | 0          | conserved  | conserved            |
| TEX14   | 0.13239881 | 0.00613824 | conserved  | conserved            |
| TEX15   | 0.02026831 | 0.01589869 | conserved  | conserved            |
| TEX2    | 1.12897223 | 0.09651248 | conserved  | conserved            |
| TEX22   | 0.18783295 | 0.00737011 | conserved  | conserved            |
| TEX26   | 0.12014758 | 0.01454785 | conserved  | conserved            |
| TEX261  | 0.35429891 | 0.73256637 | conserved  | conserved            |
| TEX30   | 0.04861982 | 0.34316447 | conserved  | conserved            |
| TEX33   | 0.00568314 | 0          | conserved  | conserved            |
| TEX35   | 0.00197826 | 0.00365779 | conserved  | conserved            |
| TEX36   | 0          | 0          | conserved  | conserved            |
| TEX37   | 0.00056432 | 0          | conserved  | conserved            |
| TEX38   | 0.0225466  | 0          | conserved  | conserved            |
| TEX43   | 0.00150848 | 0          | conserved  | conserved            |
| TEX9    | 0.12916516 | 0.41604465 | conserved  | conserved            |
| TFAM    | 0.15653327 | 0.45826057 | conserved  | conserved            |
| TFAP2A  | 0.00550274 | 0.00290605 | conserved  | conserved            |
| TFAP2B  | 0          | 0          | conserved  | conserved            |
| TFAP2C  | 0.11037379 | 1.50037078 | mouse-RGL  | conserved            |
| TFAP2D  | 0.01202513 | 0          | conserved  | conserved            |
| TFAP2E  | 0.02516899 | 0.00286844 | conserved  | conserved            |
| TFAP4   | 0.06218678 | 0.14798929 | conserved  | conserved            |
| TFB1M   | 0.35084295 | 0.03821683 | conserved  | conserved            |
| TFB2M   | 0.2759804  | 0.25969023 | conserved  | conserved            |
| TFCP2   | 1.49528778 | 0.18382147 | monkey-NSC | conserved            |
| TFCP2L1 | 0.15317046 | 0.00332819 | conserved  | conserved            |
| TFDP2   | 3.98974998 | 0.47616105 | conserved  | conserved            |
| TFE3    | 0.25496577 | 0.17694902 | conserved  | conserved            |

|          |            |            |            |           |
|----------|------------|------------|------------|-----------|
| TFEB     | 0.4424142  | 0.06530285 | conserved  | conserved |
| TFEC     | 0.03839892 | 0          | conserved  | conserved |
| TFF2     | 0          | 0          | conserved  | conserved |
| TFG      | 0.52198593 | 0.64994752 | conserved  | conserved |
| TFIP11   | 0.13605495 | 0.10218362 | conserved  | conserved |
| TFPI     | 0.07017124 | 0.03697713 | conserved  | conserved |
| TFPI2    | 0          | 0          | conserved  | conserved |
| TFPT     | 0.10717117 | 0.31628808 | conserved  | conserved |
| TFR2     | 0.03632152 | 0.02219504 | conserved  | conserved |
| TFRC     | 0.36309831 | 0.18883562 | conserved  | conserved |
| TGDS     | 0.16224844 | 0.13131487 | conserved  | conserved |
| TGFB1    | 0.307489   | 0.01942233 | conserved  | conserved |
| TGFB11   | 0.00117361 | 0.07283503 | conserved  | conserved |
| TGFB2    | 2.60196064 | 1.70055464 | conserved  | conserved |
| TGFB3    | 0.19342671 | 0.13939245 | conserved  | conserved |
| TGFB1    | 0.00112965 | 0          | conserved  | conserved |
| TGFBR1   | 0.41442143 | 0.27642985 | conserved  | conserved |
| TGFBR2   | 0.1007654  | 0.03392329 | conserved  | conserved |
| TGFBR3   | 0.78379902 | 0.00476005 | conserved  | conserved |
| TGFBRAP1 | 0.19869918 | 0.21924831 | conserved  | conserved |
| TGIF1    | 0.13060356 | 0.21213277 | conserved  | conserved |
| TGM2     | 0.00344414 | 0.02105677 | conserved  | conserved |
| TGM5     | 0.00638987 | 0          | conserved  | conserved |
| TGM7     | 0.00848261 | 0          | conserved  | conserved |
| TGS1     | 0.31892939 | 0.52836806 | conserved  | conserved |
| TH       | 0          | 0          | conserved  | conserved |
| THADA    | 2.72177957 | 0.05146569 | monkey-NSC | conserved |
| THAP1    | 0.06054868 | 0.12227206 | conserved  | conserved |
| THAP11   | 0.01815536 | 0.50004756 | conserved  | conserved |
| THAP2    | 0.12413349 | 0.20528554 | conserved  | conserved |
| THAP3    | 0.34102131 | 0.88332323 | conserved  | conserved |
| THAP4    | 0.45553371 | 0.15448641 | conserved  | conserved |
| THAP7    | 0.11899165 | 0.45076971 | conserved  | conserved |
| THBS1    | 0.0025595  | 0.06529953 | conserved  | conserved |
| THBS3    | 0.5449537  | 0.5589028  | conserved  | conserved |
| THBS4    | 0.00147993 | 0.04429911 | conserved  | conserved |
| THEGL    | 0.08830284 | 0          | conserved  | conserved |
| THEM4    | 0.16240343 | 0.57935458 | conserved  | conserved |
| THEM6    | 0.03857587 | 0.03196294 | conserved  | conserved |
| THEMIS   | 0.01033911 | 0          | conserved  | conserved |
| THEMIS2  | 0.04040656 | 0          | conserved  | conserved |

|         |            |            |            |           |
|---------|------------|------------|------------|-----------|
| THNSL2  | 0.3855513  | 0.04172478 | conserved  | conserved |
| THOC1   | 0.67947035 | 0.25185473 | conserved  | conserved |
| THOC2   | 1.66325488 | 1.19079126 | conserved  | conserved |
| THOC3   | 0.09650349 | 0.46967937 | conserved  | conserved |
| THOC5   | 0.23752452 | 0.084641   | conserved  | conserved |
| THOC6   | 0.01336755 | 0.22023244 | conserved  | conserved |
| THOC7   | 0.39953193 | 1.85661969 | conserved  | conserved |
| THOP1   | 0.1281719  | 0.35804261 | conserved  | conserved |
| THPO    | 0.03173173 | 0          | conserved  | conserved |
| THRA    | 0.57729162 | 2.14653295 | conserved  | conserved |
| THRB    | 1.92290291 | 0.05163665 | monkey-NSC | conserved |
| THSD1   | 0.95864869 | 0.006369   | conserved  | conserved |
| THSD4   | 0.14897011 | 0.00829256 | conserved  | conserved |
| THSD7A  | 3.59306653 | 0.0505246  | conserved  | conserved |
| THSD7B  | 0.82643149 | 0.07612897 | conserved  | conserved |
| THTPA   | 1.0916209  | 0.37752356 | conserved  | conserved |
| THUMPD1 | 0.11484408 | 0.2870426  | conserved  | conserved |
| THUMPD2 | 0.33007002 | 0.08407925 | conserved  | conserved |
| THUMPD3 | 0.31072013 | 0.33315385 | conserved  | conserved |
| THY1    | 0.46704095 | 0.20888206 | conserved  | conserved |
| THYN1   | 0.07865288 | 0.78462224 | conserved  | conserved |
| TIA1    | 1.65198751 | 2.13213756 | conserved  | conserved |
| TIAL1   | 0.62260743 | 0.70675444 | conserved  | conserved |
| TIAM1   | 2.11443153 | 0.03911885 | monkey-NSC | conserved |
| TIAM2   | 0.59799296 | 0.06342061 | conserved  | conserved |
| TICAM1  | 0.01383079 | 0.06606357 | conserved  | conserved |
| TICRR   | 0          | 0.04006192 | conserved  | conserved |
| TIE1    | 0.04370059 | 0          | conserved  | conserved |
| TIFA    | 0.0016586  | 0.30500962 | conserved  | conserved |
| TIGD2   | 0.01029606 | 0.43640533 | conserved  | conserved |
| TIMD4   | 0.00810289 | 0          | conserved  | conserved |
| TIMM17A | 0.16602568 | 1.06531366 | conserved  | conserved |
| TIMM17B | 0.02429812 | 0.86263667 | conserved  | conserved |
| TIMM21  | 0.07059607 | 0.58892138 | conserved  | conserved |
| TIMM22  | 0.10076356 | 0.83266564 | conserved  | conserved |
| TIMM23  | 1.02768569 | 0.02093781 | conserved  | conserved |
| TIMM44  | 0.11989582 | 0.49831627 | conserved  | conserved |
| TIMMDC1 | 0.79728295 | 0.29546506 | conserved  | conserved |
| TIMP1   | 0.01406492 | 0.01904617 | conserved  | conserved |
| TIMP2   | 0.24869203 | 1.27148063 | conserved  | conserved |
| TIMP3   | 4.178143   | 1.20907739 | monkey-NSC | conserved |

|         |            |            |            |           |
|---------|------------|------------|------------|-----------|
| TIMP4   | 0.00383662 | 0.79132212 | conserved  | conserved |
| TINF2   | 0.03316888 | 0.13737737 | conserved  | conserved |
| TIPARP  | 0.27914184 | 1.13465215 | conserved  | conserved |
| TIPIN   | 0.05515734 | 1.23035694 | conserved  | conserved |
| TJAP1   | 0.08466873 | 0.13762593 | conserved  | conserved |
| TJP1    | 5.8321807  | 0.62864583 | conserved  | conserved |
| TK1     | 0.0081268  | 0.07020234 | conserved  | conserved |
| TK2     | 0.42629424 | 0.1907648  | conserved  | conserved |
| TKFC    | 0.05006768 | 0.10963485 | conserved  | conserved |
| TKT     | 0.48112048 | 1.46407726 | conserved  | conserved |
| TKTL1   | 0.03316397 | 0          | conserved  | conserved |
| TLDC2   | 0.00375482 | 0          | conserved  | conserved |
| TLE1    | 2.75845185 | 1.13297543 | conserved  | conserved |
| TLE2    | 0.13242615 | 0.06382734 | conserved  | conserved |
| TLE3    | 0.5825718  | 0.42369091 | conserved  | conserved |
| TLE4    | 1.43247249 | 0.82480121 | conserved  | conserved |
| TLE6    | 0.0044158  | 0          | conserved  | conserved |
| TLK2    | 1.53861103 | 0.27539281 | conserved  | conserved |
| TLL1    | 0.22051739 | 0          | conserved  | conserved |
| TLL2    | 0.05577511 | 0          | conserved  | conserved |
| TLN1    | 0.15983481 | 0.52900953 | conserved  | conserved |
| TLN2    | 5.20765825 | 0.11935517 | monkey-NSC | conserved |
| TLR1    | 0.00734281 | 0.0807562  | conserved  | conserved |
| TLR2    | 0.00286652 | 0.00374955 | conserved  | conserved |
| TLR3    | 0.00380283 | 0.16877351 | conserved  | conserved |
| TLR4    | 0.09369718 | 0          | conserved  | conserved |
| TLR5    | 0.03289629 | 0          | conserved  | conserved |
| TLR7    | 0.00204174 | 0          | conserved  | conserved |
| TLR8    | 0.00300477 | 0          | conserved  | conserved |
| TM2D1   | 0.51152086 | 1.16915684 | conserved  | conserved |
| TM2D3   | 0.23754204 | 0.68135849 | conserved  | conserved |
| TM4SF20 | 0.03549353 | 0          | conserved  | conserved |
| TM4SF4  | 0          | 0          | conserved  | conserved |
| TM4SF5  | 0.02536077 | 0.00430314 | conserved  | conserved |
| TM6SF1  | 0.18510675 | 0.00503465 | conserved  | conserved |
| TM6SF2  | 0.01293672 | 0.00595068 | conserved  | conserved |
| TM7SF3  | 0.24534914 | 0.57136246 | conserved  | conserved |
| TM9SF2  | 0.64841954 | 0.53101945 | conserved  | conserved |
| TM9SF3  | 1.03842064 | 1.25394915 | conserved  | conserved |
| TM9SF4  | 0.97280673 | 0.34887887 | conserved  | conserved |
| TMBIM1  | 0.37286094 | 0.15779087 | conserved  | conserved |

|          |            |            |            |                      |
|----------|------------|------------|------------|----------------------|
| TMBIM6   | 0.8673229  | 2.41266288 | conserved  | conserved            |
| TMC1     | 0.11008017 | 0          | conserved  | conserved            |
| TMC2     | 0.04965985 | 0          | conserved  | conserved            |
| TMC3     | 0.00607702 | 0          | conserved  | conserved            |
| TMC4     | 0.03052621 | 0.03935406 | conserved  | conserved            |
| TMC5     | 0.01614595 | 0          | conserved  | conserved            |
| TMC6     | 0.04855081 | 0.01454403 | conserved  | conserved            |
| TMC7     | 0.24762651 | 0.05424099 | conserved  | conserved            |
| TMC8     | 0.00346294 | 0          | conserved  | conserved            |
| TMCC1    | 3.51380343 | 1.35853879 | conserved  | conserved            |
| TMCC2    | 0.12696632 | 0.13622684 | conserved  | conserved            |
| TMCC3    | 0.78616149 | 0.29487346 | conserved  | conserved            |
| TMCO1    | 0.53408087 | 1.37437737 | conserved  | conserved            |
| TMCO2    | 0.00096119 | 0          | conserved  | conserved            |
| TMCO3    | 0.85800751 | 0.23568643 | conserved  | conserved            |
| TMCO4    | 0.46205534 | 0.0127571  | conserved  | conserved            |
| TMCO6    | 0.04378915 | 0.19091106 | conserved  | conserved            |
| TMED1    | 0.04634141 | 0.82063523 | conserved  | conserved            |
| TMED10   | 0.83329074 | 2.19780415 | conserved  | conserved            |
| TMED3    | 0.18307599 | 0.61694519 | conserved  | conserved            |
| TMED4    | 0.1094172  | 0.71178787 | conserved  | conserved            |
| TMED5    | 0.08404799 | 0.77991937 | conserved  | conserved            |
| TMED9    | 0.1951787  | 1.62120809 | mouse-RGL  | conserved            |
| TMEFF2   | 3.0358811  | 0.1363782  | conserved  | conserved            |
| TMEM100  | 0.20177093 | 0.42316352 | conserved  | conserved            |
| TMEM101  | 0.06538608 | 0.30348042 | conserved  | conserved            |
| TMEM104  | 0.5048001  | 0.07993365 | conserved  | conserved            |
| TMEM106A | 0.13534696 | 0.01393515 | conserved  | conserved            |
| TMEM106B | 0.6095356  | 0.73417129 | conserved  | conserved            |
| TMEM106C | 0.3860287  | 0.79367848 | conserved  | conserved            |
| TMEM107  | 0.07290481 | 0.51904981 | conserved  | conserved            |
| TMEM108  | 0.97899136 | 0.12775051 | conserved  | conserved            |
| TMEM109  | 0.03748934 | 0.18523879 | conserved  | conserved            |
| TMEM11   | 0.04626528 | 0.53772814 | conserved  | conserved            |
| TMEM114  | 0.02535092 | 0.00936848 | conserved  | conserved            |
| TMEM117  | 1.4772585  | 0.00726185 | monkey-NSC | monkey-NSC1-enriched |
| TMEM120B | 0.43581017 | 0.06165663 | conserved  | conserved            |
| TMEM123  | 0.05571517 | 0.18447608 | conserved  | conserved            |
| TMEM125  | 0.00439375 | 0          | conserved  | conserved            |
| TMEM128  | 0.06856272 | 0.56578421 | conserved  | conserved            |
| TMEM129  | 0.0615994  | 0.23788935 | conserved  | conserved            |



|          |            |            |            |           |
|----------|------------|------------|------------|-----------|
| TMEM130  | 0.09598081 | 0.0171479  | conserved  | conserved |
| TMEM131  | 2.2314779  | 0.34318463 | monkey-NSC | conserved |
| TMEM132B | 3.55591691 | 1.12658716 | conserved  | conserved |
| TMEM132C | 2.79155308 | 0.18748008 | monkey-NSC | conserved |
| TMEM132D | 0.61485609 | 0          | conserved  | conserved |
| TMEM132E | 0.0065121  | 0.0025805  | conserved  | conserved |
| TMEM135  | 3.4541361  | 0.18582948 | conserved  | conserved |
| TMEM138  | 0.06370416 | 0.3892941  | conserved  | conserved |
| TMEM143  | 0.26335885 | 0.05027639 | conserved  | conserved |
| TMEM144  | 0.13848253 | 0.1879972  | conserved  | conserved |
| TMEM145  | 0.01686277 | 0.02756558 | conserved  | conserved |
| TMEM147  | 0.07657763 | 1.68334356 | conserved  | conserved |
| TMEM150B | 0.02337849 | 0          | conserved  | conserved |
| TMEM150C | 0.31709823 | 0.03094804 | conserved  | conserved |
| TMEM154  | 0.00640276 | 0          | conserved  | conserved |
| TMEM156  | 0.05991196 | 0          | conserved  | conserved |
| TMEM159  | 0.0063683  | 0.10347829 | conserved  | conserved |
| TMEM161A | 0.18568833 | 0.19961878 | conserved  | conserved |
| TMEM164  | 1.59684027 | 0.19885383 | conserved  | conserved |
| TMEM165  | 0.3611009  | 1.2093392  | mouse-RGL  | conserved |
| TMEM168  | 0.30109693 | 0.19936566 | conserved  | conserved |
| TMEM169  | 0.08144527 | 0.01595793 | conserved  | conserved |
| TMEM171  | 0.00550999 | 0.00393795 | conserved  | conserved |
| TMEM174  | 0          | 0          | conserved  | conserved |
| TMEM175  | 0.29342562 | 0.22743807 | conserved  | conserved |
| TMEM176B | 0.12849576 | 0.30102078 | conserved  | conserved |
| TMEM178B | 1.60421697 | 0.06258781 | conserved  | conserved |
| TMEM179  | 0.00195093 | 0.06655697 | conserved  | conserved |
| TMEM18   | 0.01924155 | 0.22365209 | conserved  | conserved |
| TMEM182  | 0.1079348  | 0          | conserved  | conserved |
| TMEM184C | 0.60721491 | 0.78302118 | conserved  | conserved |
| TMEM186  | 0.02758481 | 0.10706063 | conserved  | conserved |
| TMEM190  | 0          | 0          | conserved  | conserved |
| TMEM192  | 0.46960104 | 0.28380224 | conserved  | conserved |
| TMEM198  | 0.04218342 | 0.07123768 | conserved  | conserved |
| TMEM199  | 0.04775137 | 0.24994739 | conserved  | conserved |
| TMEM200A | 0.00324697 | 0.03401792 | conserved  | conserved |
| TMEM203  | 0.04615064 | 0.3135108  | conserved  | conserved |
| TMEM204  | 0.02983196 | 0          | conserved  | conserved |
| TMEM205  | 0.16285008 | 0.64970809 | conserved  | conserved |
| TMEM207  | 0.00218037 | 0          | conserved  | conserved |

|          |            |            |           |           |
|----------|------------|------------|-----------|-----------|
| TMEM208  | 0.10454696 | 1.030296   | mouse-RGL | conserved |
| TMEM209  | 0.21058688 | 0.15554617 | conserved | conserved |
| TMEM210  | 0.0024813  | 0          | conserved | conserved |
| TMEM211  | 0          | 0          | conserved | conserved |
| TMEM212  | 0          | 0.00846737 | conserved | conserved |
| TMEM213  | 0.01919057 | 0          | conserved | conserved |
| TMEM215  | 0.00664385 | 0.01472645 | conserved | conserved |
| TMEM216  | 0.09115888 | 0.36084125 | conserved | conserved |
| TMEM217  | 0.03844342 | 0.00378266 | conserved | conserved |
| TMEM218  | 0.05490614 | 0.41549116 | conserved | conserved |
| TMEM220  | 0.42422999 | 0.02401796 | conserved | conserved |
| TMEM222  | 0.21825855 | 0.77257948 | conserved | conserved |
| TMEM225  | 0.01006215 | 0          | conserved | conserved |
| TMEM229B | 0.00845412 | 0.07495242 | conserved | conserved |
| TMEM231  | 0.50455048 | 0.0873335  | conserved | conserved |
| TMEM232  | 0.95861365 | 0.00645903 | conserved | conserved |
| TMEM233  | 0.01499816 | 0          | conserved | conserved |
| TMEM235  | 0.00170077 | 0          | conserved | conserved |
| TMEM237  | 0.22192834 | 0.54720836 | conserved | conserved |
| TMEM241  | 0.69437669 | 0.02304704 | conserved | conserved |
| TMEM243  | 0.08830966 | 1.2212906  | conserved | conserved |
| TMEM245  | 0.68502686 | 0.38129812 | conserved | conserved |
| TMEM247  | 0          | 0          | conserved | conserved |
| TMEM248  | 0.34771177 | 0.29227085 | conserved | conserved |
| TMEM25   | 0.37175944 | 0.06314061 | conserved | conserved |
| TMEM252  | 0.00066323 | 0          | conserved | conserved |
| TMEM253  | 0          | 0.00223928 | conserved | conserved |
| TMEM258  | 0.01576871 | 2.22441156 | conserved | conserved |
| TMEM259  | 0.94922224 | 0.29145115 | conserved | conserved |
| TMEM260  | 0.70703109 | 0.11802089 | conserved | conserved |
| TMEM263  | 0.1094474  | 0.60066156 | conserved | conserved |
| TMEM30A  | 0.36652064 | 1.01962362 | conserved | conserved |
| TMEM33   | 0.2437982  | 1.05383545 | mouse-RGL | conserved |
| TMEM37   | 0          | 0.05190948 | conserved | conserved |
| TMEM38A  | 0.49795072 | 0.26843083 | conserved | conserved |
| TMEM39A  | 0.27834174 | 0.15266256 | conserved | conserved |
| TMEM39B  | 0.47557964 | 0.10614393 | conserved | conserved |
| TMEM40   | 0.01758637 | 0.02623544 | conserved | conserved |
| TMEM41B  | 0.53460339 | 0.47770487 | conserved | conserved |
| TMEM43   | 0.1521388  | 0.18688775 | conserved | conserved |
| TMEM44   | 0.07456602 | 0.17816397 | conserved | conserved |

|           |            |            |           |           |
|-----------|------------|------------|-----------|-----------|
| TMEM50A   | 0.34387934 | 1.1868188  | conserved | conserved |
| TMEM51    | 0.20036425 | 0.10167167 | conserved | conserved |
| TMEM52B   | 0.00404982 | 0          | conserved | conserved |
| TMEM53    | 0.30268065 | 0.03114881 | conserved | conserved |
| TMEM54    | 0.03830327 | 0          | conserved | conserved |
| TMEM59    | 0.38132179 | 2.59217436 | conserved | conserved |
| TMEM60    | 0.03814162 | 0.97185884 | mouse-RGL | conserved |
| TMEM61    | 0.00662581 | 0          | conserved | conserved |
| TMEM62    | 0.28029281 | 0.07831808 | conserved | conserved |
| TMEM63B   | 0.23258769 | 0.31441207 | conserved | conserved |
| TMEM63C   | 0.18454667 | 0.00438835 | conserved | conserved |
| TMEM64    | 0.38546797 | 0.11457794 | conserved | conserved |
| TMEM67    | 0.61095017 | 0.10447465 | conserved | conserved |
| TMEM68    | 0.31949827 | 0.31158982 | conserved | conserved |
| TMEM70    | 0.1085759  | 0.39646194 | conserved | conserved |
| TMEM71    | 0.00720571 | 0          | conserved | conserved |
| TMEM72    | 0.00111466 | 0          | conserved | conserved |
| TMEM74    | 0.03759837 | 0          | conserved | conserved |
| TMEM74B   | 0.00766737 | 0.03153324 | conserved | conserved |
| TMEM80    | 0.60807661 | 0.74655231 | conserved | conserved |
| TMEM86A   | 0.10625794 | 0.06126608 | conserved | conserved |
| TMEM87A   | 1.91449469 | 0.18354114 | conserved | conserved |
| TMEM88    | 0.02267157 | 0.03960831 | conserved | conserved |
| TMEM89    | 0.00457081 | 0.00963325 | conserved | conserved |
| TMEM8B    | 0.18458036 | 0.14039254 | conserved | conserved |
| TMEM9     | 0.25768253 | 0.86877384 | conserved | conserved |
| TMEM92    | 0          | 0          | conserved | conserved |
| TMEM94    | 1.41887043 | 0.14900018 | conserved | conserved |
| TMEM95    | 0.0006565  | 0          | conserved | conserved |
| TMEM97    | 0.07195597 | 0.26607247 | conserved | conserved |
| TMEM98    | 0.03537645 | 0.20759663 | conserved | conserved |
| TMF1      | 0.21578123 | 0.47799446 | conserved | conserved |
| TMIGD1    | 0.00094741 | 0.01431494 | conserved | conserved |
| TMIGD3    | 0.04208269 | 0          | conserved | conserved |
| TMOD3     | 0.31217326 | 0.3532651  | conserved | conserved |
| TMPPE     | 0.00120878 | 0.04616796 | conserved | conserved |
| TMPRSS11A | 0.00630081 | 0          | conserved | conserved |
| TMPRSS11E | 0.00818984 | 0          | conserved | conserved |
| TMPRSS11F | 0.00490978 | 0          | conserved | conserved |
| TMPRSS12  | 0.09290506 | 0          | conserved | conserved |
| TMPRSS13  | 0          | 0          | conserved | conserved |

|           |            |            |            |           |
|-----------|------------|------------|------------|-----------|
| TMPRSS2   | 0.00050179 | 0          | conserved  | conserved |
| TMPRSS3   | 0.0050998  | 0          | conserved  | conserved |
| TMPRSS6   | 0.00265859 | 0          | conserved  | conserved |
| TMPRSS7   | 0.04068786 | 0.02185807 | conserved  | conserved |
| TMTC1     | 4.78321089 | 0          | monkey-NSC | conserved |
| TMTC3     | 0.46350738 | 0.0875226  | conserved  | conserved |
| TMTC4     | 0.68111735 | 0.13959227 | conserved  | conserved |
| TMUB1     | 0.0292567  | 0.23838413 | conserved  | conserved |
| TMUB2     | 0.15483249 | 0.38950263 | conserved  | conserved |
| TMX1      | 0.33764276 | 0.79575813 | conserved  | conserved |
| TMX3      | 0.69403605 | 0.46614534 | conserved  | conserved |
| TMX4      | 0.3844288  | 0.5682804  | conserved  | conserved |
| TNC       | 4.34110838 | 2.83359782 | mouse-RGL  | conserved |
| TNF       | 0          | 0          | conserved  | conserved |
| TNFAIP1   | 0.05145664 | 0.86008843 | conserved  | conserved |
| TNFAIP2   | 0.01198399 | 0          | conserved  | conserved |
| TNFAIP3   | 0.05224726 | 0.00437939 | conserved  | conserved |
| TNFAIP6   | 0.01722938 | 0.02583372 | conserved  | conserved |
| TNFAIP8L1 | 0.01257527 | 0.02511822 | conserved  | conserved |
| TNFAIP8L3 | 0.31036039 | 0          | conserved  | conserved |
| TNFRSF11A | 0.01301555 | 0.00324993 | conserved  | conserved |
| TNFRSF11B | 0.15770767 | 0          | conserved  | conserved |
| TNFRSF17  | 0.00719694 | 0          | conserved  | conserved |
| TNFRSF18  | 0.00108926 | 0          | conserved  | conserved |
| TNFRSF19  | 1.26393061 | 2.00572807 | conserved  | conserved |
| TNFRSF1A  | 0.26557583 | 0.15548382 | conserved  | conserved |
| TNFRSF1B  | 0.03424307 | 0          | conserved  | conserved |
| TNFRSF21  | 0.25748715 | 0.27867256 | conserved  | conserved |
| TNFRSF25  | 0.1430292  | 0.00305526 | conserved  | conserved |
| TNFRSF8   | 0.03091628 | 0.00465706 | conserved  | conserved |
| TNFRSF9   | 0.05548579 | 0.00310921 | conserved  | conserved |
| TNFSF10   | 0.00650268 | 0          | conserved  | conserved |
| TNFSF11   | 0.00969312 | 0          | conserved  | conserved |
| TNFSF13B  | 0.06473327 | 0          | conserved  | conserved |
| TNFSF14   | 0.00072702 | 0          | conserved  | conserved |
| TNFSF15   | 0.0018382  | 0          | conserved  | conserved |
| TNFSF18   | 0          | 0          | conserved  | conserved |
| TNFSF4    | 4.13268757 | 0          | conserved  | conserved |
| TNFSF8    | 0.0199983  | 0          | conserved  | conserved |
| TNIK      | 44.1082249 | 0.72471962 | conserved  | conserved |
| TNIP1     | 0.15864102 | 0.05870688 | conserved  | conserved |

|          |            |            |            |           |
|----------|------------|------------|------------|-----------|
| TNIP2    | 0.06661316 | 0.08744951 | conserved  | conserved |
| TNIP3    | 0.00992612 | 0          | conserved  | conserved |
| TNK1     | 0.0216715  | 0.01018295 | conserved  | conserved |
| TNK2     | 1.73724471 | 0.14306388 | conserved  | conserved |
| TNKS     | 2.80746852 | 0.07016841 | conserved  | conserved |
| TNKS1BP1 | 0.41449792 | 0.08933297 | conserved  | conserved |
| TNKS2    | 0.88411194 | 0.71933566 | conserved  | conserved |
| TNMD     | 0.00132138 | 0          | conserved  | conserved |
| TNN      | 0.03994582 | 0.00383228 | conserved  | conserved |
| TNNC1    | 0.00493502 | 0.0056897  | conserved  | conserved |
| TNNC2    | 0.02090902 | 0          | conserved  | conserved |
| TNNI1    | 0.00233108 | 0          | conserved  | conserved |
| TNNI2    | 0          | 0          | conserved  | conserved |
| TNNT2    | 0.02784476 | 0          | conserved  | conserved |
| TNNT3    | 0          | 0.13011807 | conserved  | conserved |
| TNP2     | 0          | 0          | conserved  | conserved |
| TNPO1    | 2.10393855 | 0.6060896  | conserved  | conserved |
| TNPO3    | 1.22613993 | 0.58488973 | conserved  | conserved |
| TNR      | 0.81817135 | 0.06857494 | monkey-NSC | conserved |
| TNRC6A   | 4.12528719 | 0.78053056 | conserved  | conserved |
| TNRC6B   | 5.46023825 | 0.89932438 | conserved  | conserved |
| TNRC6C   | 2.46184456 | 0.47956729 | conserved  | conserved |
| TNS1     | 0.23240249 | 0.12061779 | conserved  | conserved |
| TNS2     | 0.27428972 | 0.02458672 | conserved  | conserved |
| TNS3     | 3.56244384 | 0.77050171 | conserved  | conserved |
| TNS4     | 0          | 0          | conserved  | conserved |
| TOB1     | 0.16754345 | 1.59383032 | mouse-RGL  | conserved |
| TOB2     | 0.3557142  | 0.31219057 | conserved  | conserved |
| TOE1     | 0.02579949 | 0.11342753 | conserved  | conserved |
| TOLLIP   | 0.34177379 | 0.34875015 | conserved  | conserved |
| TOM1     | 0.41463768 | 0.25070013 | conserved  | conserved |
| TOM1L1   | 0.40677953 | 0.31540879 | conserved  | conserved |
| TOM1L2   | 5.36517485 | 0.34306321 | monkey-NSC | conserved |
| TOMM22   | 0.04569647 | 1.19025623 | conserved  | conserved |
| TOMM34   | 0.07704271 | 0.32169618 | conserved  | conserved |
| TOMM40   | 0.16675961 | 1.40305508 | mouse-RGL  | conserved |
| TOP1     | 1.33523601 | 2.74502116 | mouse-RGL  | conserved |
| TOP1MT   | 0.38863493 | 0.10336386 | conserved  | conserved |
| TOP2A    | 0.01835881 | 0.12326212 | conserved  | conserved |
| TOP2B    | 1.29723117 | 1.05934493 | conserved  | conserved |
| TOP3A    | 0.31814083 | 0.00941791 | conserved  | conserved |

|          |            |            |            |           |
|----------|------------|------------|------------|-----------|
| TOP3B    | 0.26888843 | 0.2375574  | conserved  | conserved |
| TOPAZ1   | 0.01361783 | 0          | conserved  | conserved |
| TOPBP1   | 0.47567321 | 0.27910443 | conserved  | conserved |
| TOPORS   | 0.17029535 | 0.63481814 | conserved  | conserved |
| TOR1AIP1 | 0.40306458 | 0.67956941 | conserved  | conserved |
| TOR1AIP2 | 0.21200012 | 0.74864586 | conserved  | conserved |
| TOR1B    | 0.1298335  | 0.30905747 | conserved  | conserved |
| TOR3A    | 0.096098   | 0.07314559 | conserved  | conserved |
| TOX      | 0.7829997  | 0.00722679 | conserved  | conserved |
| TOX2     | 0.08429027 | 0.03245886 | conserved  | conserved |
| TOX3     | 0.07480024 | 0.54862832 | conserved  | conserved |
| TPBG     | 0.01708921 | 1.14568958 | mouse-RGL  | conserved |
| TPCN1    | 6.40094848 | 0.94961559 | monkey-NSC | conserved |
| TPD52L1  | 2.6975579  | 0.13531391 | monkey-NSC | conserved |
| TPD52L2  | 0.91416654 | 1.15319418 | conserved  | conserved |
| TPGS2    | 0.27954011 | 0.41316096 | conserved  | conserved |
| TPH2     | 0.00716019 | 0.00408436 | conserved  | conserved |
| TPK1     | 1.07781481 | 0.06823098 | conserved  | conserved |
| TPMT     | 0.09632261 | 0.13334449 | conserved  | conserved |
| TPP1     | 0.14320637 | 0.4396434  | conserved  | conserved |
| TPP2     | 0.72337614 | 0.42006492 | conserved  | conserved |
| TPPP2    | 0.00167109 | 0          | conserved  | conserved |
| TPPP3    | 0.01525054 | 0.16887742 | conserved  | conserved |
| TPR      | 0.58712091 | 0.91965423 | conserved  | conserved |
| TPRA1    | 0.06244113 | 0.14810582 | conserved  | conserved |
| TPRKB    | 0.05701695 | 1.02749256 | conserved  | conserved |
| TPSG1    | 0          | 0          | conserved  | conserved |
| TPST1    | 0.62254348 | 0.35736562 | conserved  | conserved |
| TPX2     | 0.05083162 | 0.04609223 | conserved  | conserved |
| TRA2A    | 2.33726762 | 1.45777116 | conserved  | conserved |
| TRA2B    | 1.05445942 | 3.0409995  | conserved  | conserved |
| TRABD    | 0.32806343 | 0.28205779 | conserved  | conserved |
| TRABD2B  | 0.00366613 | 0          | conserved  | conserved |
| TRAF1    | 0.19505452 | 0.10893647 | conserved  | conserved |
| TRAF3    | 0.93031759 | 0.31982394 | conserved  | conserved |
| TRAF3IP1 | 0.40179003 | 0.10672496 | conserved  | conserved |
| TRAF3IP2 | 1.00461158 | 0          | conserved  | conserved |
| TRAF3IP3 | 0.05835885 | 0.0117685  | conserved  | conserved |
| TRAF4    | 0.31458545 | 0.49361059 | conserved  | conserved |
| TRAF5    | 0.15872883 | 0.02244209 | conserved  | conserved |
| TRAF6    | 0.17893882 | 0.07492075 | conserved  | conserved |

|          |            |            |           |           |
|----------|------------|------------|-----------|-----------|
| TRAF7    | 0.35181668 | 0.49196561 | conserved | conserved |
| TRAFD1   | 0.39652107 | 0.21485349 | conserved | conserved |
| TRAIP    | 0.06258631 | 0.03404684 | conserved | conserved |
| TRAK1    | 3.59705322 | 0.42726863 | conserved | conserved |
| TRAK2    | 0.28479258 | 0.08979466 | conserved | conserved |
| TRAM1    | 0.35297969 | 0.63760274 | conserved | conserved |
| TRAM1L1  | 0.00268433 | 0.30853456 | conserved | conserved |
| TRAM2    | 0.12199459 | 0.04871653 | conserved | conserved |
| TRANK1   | 0.3636907  | 0.00829256 | conserved | conserved |
| TRAP1    | 0.47170172 | 0.19899448 | conserved | conserved |
| TRAPPC1  | 0.0554158  | 1.02311672 | mouse-RGL | conserved |
| TRAPPC11 | 0.44817232 | 0.08878336 | conserved | conserved |
| TRAPPC12 | 0.78492277 | 0.13578489 | conserved | conserved |
| TRAPPC13 | 0.63773526 | 0.45246378 | conserved | conserved |
| TRAPPC3  | 0.09965932 | 1.00641548 | conserved | conserved |
| TRAPPC3L | 0.02860353 | 0          | conserved | conserved |
| TRAPPC6B | 0.22091953 | 0.94096039 | conserved | conserved |
| TRAPPC9  | 3.3856027  | 0.07647564 | conserved | conserved |
| TRAT1    | 0.00133961 | 0          | conserved | conserved |
| TRDN     | 0.0546384  | 0          | conserved | conserved |
| TREH     | 0.12344516 | 0          | conserved | conserved |
| TREM1    | 0          | 0          | conserved | conserved |
| TREM2    | 0.00920256 | 0.01617214 | conserved | conserved |
| TREML1   | 0.00504181 | 0          | conserved | conserved |
| TREML2   | 0          | 0          | conserved | conserved |
| TRH      | 0          | 0.00921066 | conserved | conserved |
| TRHDE    | 0.63807888 | 0.01096114 | conserved | conserved |
| TRHR     | 0.00643778 | 0.00430912 | conserved | conserved |
| TRIB1    | 0.14807532 | 0.13467761 | conserved | conserved |
| TRIB2    | 0.25796727 | 0.57751721 | conserved | conserved |
| TRIB3    | 0.00502936 | 0.00440791 | conserved | conserved |
| TRIL     | 0.00314321 | 1.04568659 | conserved | conserved |
| TRIM10   | 0          | 0          | conserved | conserved |
| TRIM11   | 0.03202584 | 0.15073681 | conserved | conserved |
| TRIM13   | 0.3493781  | 0.14581569 | conserved | conserved |
| TRIM14   | 0.02181836 | 0          | conserved | conserved |
| TRIM15   | 0          | 0          | conserved | conserved |
| TRIM17   | 0.03689707 | 0.01664829 | conserved | conserved |
| TRIM21   | 0.00759182 | 0.02365364 | conserved | conserved |
| TRIM23   | 0.54328984 | 0.21481094 | conserved | conserved |
| TRIM24   | 0.71677744 | 0.19857074 | conserved | conserved |

|        |            |            |           |           |
|--------|------------|------------|-----------|-----------|
| TRIM25 | 0.28989823 | 0.03165052 | conserved | conserved |
| TRIM26 | 0.15413056 | 0.28393949 | conserved | conserved |
| TRIM27 | 0.49518926 | 0.45008102 | conserved | conserved |
| TRIM28 | 0.11183102 | 0.74982313 | conserved | conserved |
| TRIM29 | 0          | 0.01530616 | conserved | conserved |
| TRIM3  | 0.14044655 | 0.16683534 | conserved | conserved |
| TRIM32 | 0.05294757 | 0.61087537 | conserved | conserved |
| TRIM33 | 1.61909796 | 0.28655788 | conserved | conserved |
| TRIM35 | 0.11395665 | 0.80613875 | conserved | conserved |
| TRIM36 | 0.20645764 | 0.01513026 | conserved | conserved |
| TRIM37 | 1.38017684 | 0.53160906 | conserved | conserved |
| TRIM38 | 0.0120661  | 0          | conserved | conserved |
| TRIM40 | 0          | 0          | conserved | conserved |
| TRIM41 | 0.25360921 | 0.17029625 | conserved | conserved |
| TRIM42 | 0          | 0          | conserved | conserved |
| TRIM44 | 1.94692521 | 0.48632055 | conserved | conserved |
| TRIM45 | 0.06658231 | 0.08306532 | conserved | conserved |
| TRIM46 | 0.06965056 | 0.07426144 | conserved | conserved |
| TRIM47 | 0.03003068 | 0.21704931 | conserved | conserved |
| TRIM50 | 0.00100406 | 0          | conserved | conserved |
| TRIM54 | 0          | 0          | conserved | conserved |
| TRIM55 | 0.00574252 | 0          | conserved | conserved |
| TRIM58 | 1.38698854 | 0          | conserved | conserved |
| TRIM62 | 0.1722885  | 0.06167475 | conserved | conserved |
| TRIM63 | 0.04811815 | 0          | conserved | conserved |
| TRIM65 | 0.25552591 | 0.05203991 | conserved | conserved |
| TRIM66 | 0.1006951  | 0          | conserved | conserved |
| TRIM67 | 0.03984756 | 0.06099584 | conserved | conserved |
| TRIM69 | 0.01880071 | 0          | conserved | conserved |
| TRIM7  | 0.01546197 | 0.04092736 | conserved | conserved |
| TRIM72 | 0.00182128 | 0.00263769 | conserved | conserved |
| TRIM8  | 0.80073494 | 0.65802502 | conserved | conserved |
| TRIM9  | 10.2348836 | 1.06115655 | conserved | conserved |
| TRIML1 | 0          | 0          | conserved | conserved |
| TRIML2 | 0          | 0          | conserved | conserved |
| TRIP10 | 0.09588857 | 0.06703211 | conserved | conserved |
| TRIP11 | 1.05030754 | 0.34266516 | conserved | conserved |
| TRIP12 | 2.56739994 | 0.44340843 | conserved | conserved |
| TRIP13 | 0.00633255 | 0.02051012 | conserved | conserved |
| TRIT1  | 0.34962132 | 0.15074029 | conserved | conserved |
| TRMO   | 0.25429509 | 0.04528706 | conserved | conserved |



|          |            |            |            |           |
|----------|------------|------------|------------|-----------|
| TRMT1    | 0.13331366 | 0.38763999 | conserved  | conserved |
| TRMT10B  | 0.48617488 | 0.15006465 | conserved  | conserved |
| TRMT11   | 0.3356388  | 0.11114328 | conserved  | conserved |
| TRMT13   | 0.33560363 | 0.21683442 | conserved  | conserved |
| TRMT1L   | 0.35439737 | 0.47598154 | conserved  | conserved |
| TRMT2A   | 0.20066656 | 0.35355208 | conserved  | conserved |
| TRMT2B   | 0.09439894 | 0.09831985 | conserved  | conserved |
| TRMT5    | 0.0504847  | 0.01239587 | conserved  | conserved |
| TRMT6    | 0.09327038 | 0.57162877 | conserved  | conserved |
| TRMT61A  | 0.01552034 | 0.16682414 | conserved  | conserved |
| TRMU     | 0.4595248  | 0.23634944 | conserved  | conserved |
| TRNAU1AP | 0.48693611 | 1.13893923 | conserved  | conserved |
| TRNT1    | 0.17975519 | 0.41548856 | conserved  | conserved |
| TRO      | 0.02577395 | 0.16275173 | conserved  | conserved |
| TROAP    | 0.00247593 | 0.00288001 | conserved  | conserved |
| TRPA1    | 0.00472967 | 0          | conserved  | conserved |
| TRPC1    | 1.65171601 | 0.22908098 | conserved  | conserved |
| TRPC3    | 0.032301   | 0          | conserved  | conserved |
| TRPC4    | 0.30284002 | 0.00678642 | conserved  | conserved |
| TRPC4AP  | 1.67452151 | 0.56700021 | conserved  | conserved |
| TRPC5    | 0.4904369  | 0.0050242  | conserved  | conserved |
| TRPC6    | 0.23857624 | 0          | conserved  | conserved |
| TRPC7    | 0.02122537 | 0.01906172 | conserved  | conserved |
| TRPM1    | 0.19109437 | 0.01607043 | conserved  | conserved |
| TRPM2    | 0.05597582 | 0          | conserved  | conserved |
| TRPM3    | 12.995496  | 0.01911801 | monkey-NSC | conserved |
| TRPM5    | 0          | 0.00250653 | conserved  | conserved |
| TRPM6    | 0.1249383  | 0.01303712 | conserved  | conserved |
| TRPM7    | 1.69885555 | 0.47926836 | conserved  | conserved |
| TRPM8    | 0.02427056 | 0          | conserved  | conserved |
| TRPS1    | 12.2775102 | 1.40735144 | conserved  | conserved |
| TRPT1    | 0.06698694 | 0.15673685 | conserved  | conserved |
| TRPV1    | 0.05257463 | 0          | conserved  | conserved |
| TRPV2    | 0.0472642  | 0          | conserved  | conserved |
| TRPV3    | 0.32752956 | 0.00180907 | conserved  | conserved |
| TRPV4    | 0.00366173 | 0.0036258  | conserved  | conserved |
| TRRAP    | 1.52284872 | 0.31914899 | monkey-NSC | conserved |
| TRUB1    | 0.18323875 | 0.18521972 | conserved  | conserved |
| TRUB2    | 0.47347663 | 0.35305413 | conserved  | conserved |
| TSACC    | 0.05674907 | 0.26465044 | conserved  | conserved |
| TSC1     | 0.25415509 | 0.32068249 | conserved  | conserved |

|          |            |            |           |           |
|----------|------------|------------|-----------|-----------|
| TSC2     | 0.93852566 | 0.21177169 | conserved | conserved |
| TSC22D1  | 3.76243915 | 4.31700682 | conserved | conserved |
| TSC22D3  | 0.19900571 | 1.13171049 | conserved | conserved |
| TSC22D4  | 0.9892991  | 4.4771628  | conserved | conserved |
| TSEN2    | 0.74773758 | 0.147166   | conserved | conserved |
| TSEN34   | 0.04788436 | 2.17486996 | mouse-RGL | conserved |
| TSEN54   | 0.38450629 | 0.08882279 | conserved | conserved |
| TTFM     | 0.17514507 | 0.38156446 | conserved | conserved |
| TSG101   | 1.00551045 | 0.86582938 | conserved | conserved |
| TSGA10   | 0.39288527 | 0.12168576 | conserved | conserved |
| TSGA13   | 0.01500896 | 0          | conserved | conserved |
| TSHB     | 0          | 0          | conserved | conserved |
| TSHR     | 0.07407796 | 0.02459997 | conserved | conserved |
| TSHZ1    | 0.83495303 | 0.55756193 | conserved | conserved |
| TSHZ2    | 0.39889016 | 0.75459014 | conserved | conserved |
| TSHZ3    | 0.23675967 | 0.17367884 | conserved | conserved |
| TSKS     | 0.01294071 | 0          | conserved | conserved |
| TSKU     | 0.00340162 | 0.05398662 | conserved | conserved |
| TSN      | 0.18102943 | 2.71577371 | conserved | conserved |
| TSNAXIP1 | 0.07787159 | 0          | conserved | conserved |
| TSPAN1   | 0.01519602 | 0          | conserved | conserved |
| TSPAN10  | 0.0563154  | 0          | conserved | conserved |
| TSPAN11  | 0.13938944 | 0.02204169 | conserved | conserved |
| TSPAN12  | 0.11751375 | 1.00558943 | conserved | conserved |
| TSPAN14  | 0.29231327 | 0.09790686 | conserved | conserved |
| TSPAN15  | 0.30123416 | 1.00650455 | conserved | conserved |
| TSPAN17  | 0.06264775 | 0.10635163 | conserved | conserved |
| TSPAN18  | 0.31615635 | 0.34340103 | conserved | conserved |
| TSPAN2   | 0.03133964 | 0.0408543  | conserved | conserved |
| TSPAN3   | 0.67870523 | 5.25727011 | mouse-RGL | conserved |
| TSPAN31  | 0.09685068 | 0.9318217  | conserved | conserved |
| TSPAN33  | 0.26327753 | 0.50745328 | conserved | conserved |
| TSPAN4   | 0.08820633 | 0.07251902 | conserved | conserved |
| TSPAN5   | 4.69813923 | 0.64253298 | conserved | conserved |
| TSPAN6   | 0.03310541 | 0.89751505 | mouse-RGL | conserved |
| TSPAN8   | 0.02231383 | 0          | conserved | conserved |
| TSPEAR   | 0.18328348 | 0          | conserved | conserved |
| TSPO     | 0.06868627 | 0.22806996 | conserved | conserved |
| TSPO2    | 0          | 0          | conserved | conserved |
| TSPYL5   | 0.05037896 | 0.07288442 | conserved | conserved |
| TSR1     | 0.1057024  | 0.12626692 | conserved | conserved |

|        |            |            |            |           |
|--------|------------|------------|------------|-----------|
| TSR3   | 0.0232644  | 0.427073   | conserved  | conserved |
| TSSC4  | 0.4071535  | 0.70395041 | conserved  | conserved |
| TSSK4  | 0.03036153 | 0.01679547 | conserved  | conserved |
| TST    | 0.23231415 | 2.90991383 | mouse-RGL  | conserved |
| TSTD1  | 0.01922562 | 0.00926035 | conserved  | conserved |
| TSTD2  | 0.30418484 | 0.18664663 | conserved  | conserved |
| TTBK2  | 1.88158568 | 0.25136021 | conserved  | conserved |
| TTC1   | 0.60800217 | 0.73331253 | conserved  | conserved |
| TTC12  | 0.40383643 | 0.08454112 | conserved  | conserved |
| TTC13  | 1.36055736 | 0.17595844 | conserved  | conserved |
| TTC16  | 0.1764777  | 0.00634739 | conserved  | conserved |
| TTC17  | 2.48139525 | 0.08368297 | conserved  | conserved |
| TTC19  | 1.4148346  | 0.57806483 | conserved  | conserved |
| TTC21A | 0.29429628 | 0.00580962 | conserved  | conserved |
| TTC21B | 1.06437895 | 0.07208829 | conserved  | conserved |
| TTC22  | 0.00214133 | 0.00387386 | conserved  | conserved |
| TTC23  | 0.88896386 | 0.18532104 | conserved  | conserved |
| TTC23L | 2.07699526 | 0          | monkey-NSC | conserved |
| TTC24  | 0.045438   | 0.00366718 | conserved  | conserved |
| TTC26  | 0.39441214 | 0.05519513 | conserved  | conserved |
| TTC27  | 0.69127791 | 0.0780155  | conserved  | conserved |
| TTC28  | 7.93035786 | 1.5261172  | conserved  | conserved |
| TTC29  | 0.02590253 | 0          | conserved  | conserved |
| TTC37  | 1.76393736 | 0.04298681 | conserved  | conserved |
| TTC38  | 0.07502167 | 0.13071235 | conserved  | conserved |
| TTC39A | 0.0132623  | 0.00337361 | conserved  | conserved |
| TTC39B | 0.20644458 | 0.15350003 | conserved  | conserved |
| TTC39C | 0.72412727 | 0.08444353 | conserved  | conserved |
| TTC4   | 0.26412122 | 0.42870213 | conserved  | conserved |
| TTC5   | 0.16857251 | 0.44907823 | conserved  | conserved |
| TTC7B  | 3.44969428 | 0.08593376 | monkey-NSC | conserved |
| TTC8   | 0.60587759 | 0.3126384  | conserved  | conserved |
| TTC9B  | 0.04514104 | 0.4652193  | conserved  | conserved |
| TTC9C  | 0.11594208 | 0.22779881 | conserved  | conserved |
| TTF1   | 0.94828598 | 0.22282129 | conserved  | conserved |
| TTI1   | 0.29489682 | 0.0700301  | conserved  | conserved |
| TTK    | 0.0097629  | 0.0170876  | conserved  | conserved |
| TTLL1  | 0.06801546 | 0.17507754 | conserved  | conserved |
| TTLL10 | 0.01604278 | 0          | conserved  | conserved |
| TTLL11 | 1.44113282 | 0.01404425 | monkey-NSC | conserved |
| TTLL12 | 0.09142072 | 0.13304439 | conserved  | conserved |

|         |            |            |           |           |
|---------|------------|------------|-----------|-----------|
| TTLL2   | 0          | 0.00371059 | conserved | conserved |
| TTLL4   | 0.77271163 | 0.05455804 | conserved | conserved |
| TTLL6   | 0.01758908 | 0          | conserved | conserved |
| TTLL7   | 1.11332188 | 0.07434635 | conserved | conserved |
| TTLL8   | 0.00244371 | 0.0108152  | conserved | conserved |
| TTLL9   | 0.13205738 | 0.01785011 | conserved | conserved |
| TTPA    | 0.06153802 | 0.0273344  | conserved | conserved |
| TTPAL   | 0.09757949 | 0.12411042 | conserved | conserved |
| TTYH2   | 1.90565076 | 0.25394894 | conserved | conserved |
| TUB     | 0.39972382 | 0.04445741 | conserved | conserved |
| TUBA4A  | 0.21090039 | 0.08490781 | conserved | conserved |
| TUBA8   | 0.05038476 | 0          | conserved | conserved |
| TUBAL3  | 0          | 0          | conserved | conserved |
| TUBB1   | 0.01833585 | 0          | conserved | conserved |
| TUBB2B  | 1.28392616 | 8.8692455  | conserved | conserved |
| TUBB4A  | 0.29439545 | 0.29775527 | conserved | conserved |
| TUBD1   | 0.2961637  | 0.07499652 | conserved | conserved |
| TUBE1   | 0.06227087 | 0.02617473 | conserved | conserved |
| TUBG1   | 0.54509172 | 0.29260838 | conserved | conserved |
| TUBGCP2 | 0.39499302 | 0.23383061 | conserved | conserved |
| TUBGCP3 | 0.49940813 | 0.14481882 | conserved | conserved |
| TUBGCP4 | 0.25085946 | 0.24598637 | conserved | conserved |
| TUBGCP5 | 0.69514036 | 0.18845776 | conserved | conserved |
| TUFM    | 0.14436939 | 0.14053606 | conserved | conserved |
| TUFT1   | 0.31384714 | 0.01259076 | conserved | conserved |
| TULP1   | 0          | 0.01155686 | conserved | conserved |
| TULP2   | 0.00840239 | 0.00422117 | conserved | conserved |
| TULP3   | 1.91176637 | 0.41100889 | conserved | conserved |
| TULP4   | 1.12212283 | 0.66519034 | conserved | conserved |
| TUSC3   | 0.82813145 | 0.7671838  | conserved | conserved |
| TVP23A  | 0.20050468 | 0.21508659 | conserved | conserved |
| TWF1    | 0.13654297 | 0.8948729  | conserved | conserved |
| TWF2    | 0.03110505 | 0.32360546 | conserved | conserved |
| TXLNA   | 0.26340568 | 0.40986277 | conserved | conserved |
| TXLNG   | 0.62467605 | 0.11434497 | conserved | conserved |
| TXNDC11 | 0.63699129 | 0.20454617 | conserved | conserved |
| TXNDC16 | 0.52135498 | 0.21747287 | conserved | conserved |
| TXNDC17 | 0.00891307 | 1.3297669  | mouse-RGL | conserved |
| TXNDC8  | 0.01213308 | 0          | conserved | conserved |
| TXNDC9  | 0.13603335 | 1.03214252 | conserved | conserved |
| TXNIP   | 1.22649249 | 0.15133753 | conserved | conserved |

|         |            |            |            |           |
|---------|------------|------------|------------|-----------|
| TXNL4A  | 0.26062219 | 1.37471228 | mouse-RGL  | conserved |
| TXNRD1  | 0.69427072 | 0.53464682 | conserved  | conserved |
| TXNRD2  | 1.24717752 | 0.13794344 | monkey-NSC | conserved |
| TXNRD3  | 0.2649223  | 0.08188244 | conserved  | conserved |
| TYK2    | 0.54930301 | 0.0205286  | conserved  | conserved |
| TYMS    | 0.01890613 | 0.2604625  | conserved  | conserved |
| TYR     | 0.05273089 | 0          | conserved  | conserved |
| TYRO3   | 0.34367952 | 0.08535928 | conserved  | conserved |
| TYSND1  | 0.07346964 | 0.23256593 | conserved  | conserved |
| TYW3    | 0.25098459 | 0.06616058 | conserved  | conserved |
| TYW5    | 0.35947167 | 0.15662723 | conserved  | conserved |
| U2AF2   | 0.06795453 | 0.77328309 | conserved  | conserved |
| U2SURP  | 1.29510428 | 1.15728394 | conserved  | conserved |
| UACA    | 0.68584717 | 0.17399814 | conserved  | conserved |
| UAP1    | 0.15221275 | 0.39262679 | conserved  | conserved |
| UBA1    | 0.47060485 | 0.8660469  | conserved  | conserved |
| UBA2    | 0.59395547 | 0.48234377 | conserved  | conserved |
| UBA3    | 0.72630293 | 0.50283296 | conserved  | conserved |
| UBA5    | 0.22132402 | 0.80364902 | conserved  | conserved |
| UBA52   | 0.22173115 | 3.87921351 | conserved  | conserved |
| UBA6    | 0.54610524 | 0.15394548 | conserved  | conserved |
| UBA7    | 0.11352716 | 0.0204021  | conserved  | conserved |
| UBAC2   | 0.98523021 | 0.65917359 | conserved  | conserved |
| UBALD1  | 0.05384156 | 0.30086917 | conserved  | conserved |
| UBALD2  | 0.14652853 | 1.14586782 | conserved  | conserved |
| UBAP1   | 1.38843749 | 0.30677086 | conserved  | conserved |
| UBAP2L  | 0.78796369 | 0.92005809 | conserved  | conserved |
| UBASH3A | 0.0071404  | 0          | conserved  | conserved |
| UBASH3B | 0.23768819 | 0.05556987 | conserved  | conserved |
| UBD     | 0          | 0          | conserved  | conserved |
| UBE2A   | 0.19957703 | 0.95762905 | mouse-RGL  | conserved |
| UBE2D1  | 0.24448611 | 0.74042909 | conserved  | conserved |
| UBE2E1  | 1.01049105 | 1.45867241 | conserved  | conserved |
| UBE2E2  | 5.58832579 | 0.57742251 | conserved  | conserved |
| UBE2E3  | 1.27882156 | 1.89212476 | conserved  | conserved |
| UBE2G1  | 1.0384838  | 0.83752304 | conserved  | conserved |
| UBE2G2  | 0.37530409 | 0.47959973 | conserved  | conserved |
| UBE2H   | 1.57837629 | 0.57290171 | conserved  | conserved |
| UBE2I   | 0.36653539 | 1.78368556 | mouse-RGL  | conserved |
| UBE2J1  | 0.17874098 | 0.38783096 | conserved  | conserved |
| UBE2K   | 2.47823063 | 1.54721041 | conserved  | conserved |

|        |            |            |           |           |
|--------|------------|------------|-----------|-----------|
| UBE2L6 | 0.11602172 | 0.10237644 | conserved | conserved |
| UBE2N  | 0.48782406 | 3.27691848 | mouse-RGL | conserved |
| UBE2O  | 0.77412262 | 0.18952781 | conserved | conserved |
| UBE2Q1 | 0.13541118 | 0.25806352 | conserved | conserved |
| UBE2T  | 0.02931193 | 0.02584916 | conserved | conserved |
| UBE2U  | 0.00318249 | 0          | conserved | conserved |
| UBE3A  | 1.70570512 | 1.69010984 | conserved | conserved |
| UBE3B  | 0.41971034 | 0.15956165 | conserved | conserved |
| UBE3C  | 1.96353673 | 0.30163088 | conserved | conserved |
| UBE4A  | 0.39250922 | 0.33233122 | conserved | conserved |
| UBFD1  | 0.09531947 | 0.38315604 | conserved | conserved |
| UBIAD1 | 0.11798319 | 0.13921695 | conserved | conserved |
| UBL3   | 0.90427308 | 0.98836441 | conserved | conserved |
| UBL4A  | 0.07274793 | 0.55237676 | conserved | conserved |
| UBLCP1 | 0.12193395 | 0.25366414 | conserved | conserved |
| UBN1   | 0.48792061 | 0.29541849 | conserved | conserved |
| UBN2   | 1.20692845 | 0.88059646 | conserved | conserved |
| UBOX5  | 0.62156033 | 0.06449926 | conserved | conserved |
| UBP1   | 0.77702285 | 0.25835583 | conserved | conserved |
| UBR1   | 2.54475296 | 0.27886329 | conserved | conserved |
| UBR2   | 2.52510592 | 0.31024249 | conserved | conserved |
| UBR4   | 1.20833344 | 0.27257878 | conserved | conserved |
| UBR5   | 4.99676985 | 0.62850951 | conserved | conserved |
| UBR7   | 0.40903413 | 0.42306859 | conserved | conserved |
| UBTD2  | 0.57388167 | 0.04579543 | conserved | conserved |
| UBTF   | 0.35059119 | 0.63640503 | conserved | conserved |
| UBXN1  | 0.14974922 | 1.62986061 | mouse-RGL | conserved |
| UBXN11 | 0.07801594 | 0.10393527 | conserved | conserved |
| UBXN2A | 0.44220899 | 0.62351733 | conserved | conserved |
| UBXN2B | 0.5268841  | 0.32522715 | conserved | conserved |
| UBXN4  | 0.89853312 | 1.48403613 | conserved | conserved |
| UBXN6  | 0.34712915 | 0.77858987 | conserved | conserved |
| UBXN7  | 1.60054797 | 0.3036855  | conserved | conserved |
| UBXN8  | 0.09550219 | 0.10873438 | conserved | conserved |
| UCHL5  | 0.28488919 | 0.35289173 | conserved | conserved |
| UCK1   | 0.08477678 | 0.41315505 | conserved | conserved |
| UCK2   | 0.31019479 | 0.10864091 | conserved | conserved |
| UCKL1  | 1.01603844 | 0.17518158 | conserved | conserved |
| UCMA   | 0.00222384 | 0          | conserved | conserved |
| UCP1   | 0.00070428 | 0          | conserved | conserved |
| UCP2   | 0.01484944 | 0.37877717 | conserved | conserved |

|          |            |            |            |           |
|----------|------------|------------|------------|-----------|
| UCP3     | 0.01214547 | 0          | conserved  | conserved |
| UFL1     | 0.37896951 | 0.28844246 | conserved  | conserved |
| UFM1     | 0.12121334 | 0.88266575 | conserved  | conserved |
| UFSP2    | 0.39449531 | 0.46366032 | conserved  | conserved |
| UGCG     | 0.27880135 | 0.17326828 | conserved  | conserved |
| UGDH     | 0.1174717  | 0.43547693 | conserved  | conserved |
| UGGT1    | 0.63843599 | 0.17627647 | conserved  | conserved |
| UGGT2    | 0.66961841 | 0.12307691 | conserved  | conserved |
| UGP2     | 1.74615296 | 1.26044485 | conserved  | conserved |
| UHMK1    | 0.29607174 | 0.15186368 | conserved  | conserved |
| UHRF1    | 0.05396576 | 0.23635755 | conserved  | conserved |
| UHRF1BP1 | 0.63556587 | 0.05777066 | conserved  | conserved |
| UIMC1    | 1.19561611 | 0.16211055 | conserved  | conserved |
| ULK2     | 1.37309059 | 0.32883924 | conserved  | conserved |
| ULK4     | 1.65057143 | 0.09617474 | conserved  | conserved |
| UMOD     | 0.00200274 | 0          | conserved  | conserved |
| UMODL1   | 0.01869393 | 0          | conserved  | conserved |
| UMPS     | 0.13319826 | 0.24157899 | conserved  | conserved |
| UNC119   | 0.07895833 | 0.95748393 | conserved  | conserved |
| UNC13A   | 0.0998556  | 0.1306376  | conserved  | conserved |
| UNC13C   | 1.20523017 | 0.01973288 | monkey-NSC | conserved |
| UNC13D   | 0.02878942 | 0.03591577 | conserved  | conserved |
| UNC45A   | 0.17218818 | 0.18932677 | conserved  | conserved |
| UNC45B   | 0.00359821 | 0.00960704 | conserved  | conserved |
| UNC50    | 0.21635719 | 1.04392157 | mouse-RGL  | conserved |
| UNC5A    | 0.04791051 | 0.02533655 | conserved  | conserved |
| UNC5B    | 0.02354713 | 0.0588781  | conserved  | conserved |
| UNC5C    | 5.42638563 | 0.04225123 | monkey-NSC | conserved |
| UNC5CL   | 0          | 0          | conserved  | conserved |
| UNC5D    | 14.5849686 | 0.03142001 | monkey-NSC | conserved |
| UNC79    | 2.36058887 | 0.04731389 | monkey-NSC | conserved |
| UNC80    | 2.20246485 | 0.05210115 | monkey-NSC | conserved |
| UNC93B1  | 0.02112821 | 0.02076451 | conserved  | conserved |
| UNG      | 0.22731592 | 0.40945081 | conserved  | conserved |
| UNK      | 0.81619428 | 0.17290745 | conserved  | conserved |
| UPB1     | 0.0021946  | 0.00993381 | conserved  | conserved |
| UPF2     | 1.18869046 | 0.42673012 | conserved  | conserved |
| UPF3A    | 0.82904006 | 0.30433344 | conserved  | conserved |
| UPF3B    | 0.32466006 | 0.79002552 | conserved  | conserved |
| UPK1A    | 0.00538568 | 0          | conserved  | conserved |
| UPK3A    | 0.00272859 | 0.00358935 | conserved  | conserved |

|        |            |            |            |           |
|--------|------------|------------|------------|-----------|
| UPK3B  | 0.01080493 | 0          | conserved  | conserved |
| UPP1   | 0.00266323 | 0.08115234 | conserved  | conserved |
| UPP2   | 0.07977151 | 0.07865583 | conserved  | conserved |
| UPRT   | 0.1015373  | 0          | conserved  | conserved |
| UQCC1  | 1.36420407 | 0.1808433  | conserved  | conserved |
| UQCRC1 | 0.31552054 | 1.64042332 | conserved  | conserved |
| URB1   | 0.33425284 | 0.06685301 | conserved  | conserved |
| URB2   | 0.11953494 | 0.01551439 | conserved  | conserved |
| URGCP  | 1.21927696 | 0.17572626 | conserved  | conserved |
| URI1   | 1.13587564 | 0.6461904  | conserved  | conserved |
| URM1   | 0.19160727 | 0.587918   | conserved  | conserved |
| UROC1  | 0.00559771 | 0          | conserved  | conserved |
| UROD   | 0.07069714 | 0.27607912 | conserved  | conserved |
| UROS   | 0.23857529 | 0.14859247 | conserved  | conserved |
| USB1   | 0.08950157 | 0.1376763  | conserved  | conserved |
| USF1   | 0.03758886 | 0.69670963 | conserved  | conserved |
| USH1C  | 0.06471535 | 0          | conserved  | conserved |
| USH2A  | 0.06962743 | 0          | conserved  | conserved |
| USHBP1 | 0.00786827 | 0          | conserved  | conserved |
| USO1   | 1.09761289 | 0.36431691 | conserved  | conserved |
| USP1   | 0.14841756 | 0.6090608  | conserved  | conserved |
| USP11  | 0.61095854 | 0.19735268 | conserved  | conserved |
| USP13  | 0.56598668 | 0.01546257 | conserved  | conserved |
| USP14  | 0.98456241 | 0.5410191  | conserved  | conserved |
| USP15  | 1.48881781 | 0.11683764 | conserved  | conserved |
| USP16  | 0.27291212 | 0.29855625 | conserved  | conserved |
| USP19  | 0.16633362 | 0.33540125 | conserved  | conserved |
| USP2   | 0.23021506 | 0.30279917 | conserved  | conserved |
| USP20  | 0.82194567 | 0.12795538 | conserved  | conserved |
| USP21  | 0.01875246 | 0.24196882 | conserved  | conserved |
| USP22  | 2.08391298 | 1.13265496 | conserved  | conserved |
| USP24  | 2.31107518 | 0.31177986 | conserved  | conserved |
| USP25  | 2.17685673 | 0.25160096 | conserved  | conserved |
| USP28  | 0.79602877 | 0.04447239 | conserved  | conserved |
| USP3   | 0.78886251 | 0.61666448 | conserved  | conserved |
| USP30  | 0.3376488  | 0.10946863 | conserved  | conserved |
| USP31  | 0.3771967  | 0.0632706  | conserved  | conserved |
| USP33  | 1.47922205 | 0.23596294 | monkey-NSC | conserved |
| USP34  | 5.4930739  | 0.72477035 | conserved  | conserved |
| USP35  | 0.18021269 | 0.11638809 | conserved  | conserved |
| USP36  | 0.75442751 | 0.23414256 | conserved  | conserved |



|        |            |            |            |           |
|--------|------------|------------|------------|-----------|
| USP37  | 0.95414358 | 0.34642268 | conserved  | conserved |
| USP38  | 0.24264212 | 0.16085635 | conserved  | conserved |
| USP39  | 0.20053225 | 0.15141518 | conserved  | conserved |
| USP4   | 0.89637321 | 0.37382339 | conserved  | conserved |
| USP40  | 1.76873002 | 0.30248656 | conserved  | conserved |
| USP43  | 0.08019937 | 0.00643108 | conserved  | conserved |
| USP44  | 0.25864596 | 0          | conserved  | conserved |
| USP45  | 0.51465719 | 0.06351502 | conserved  | conserved |
| USP46  | 1.56892729 | 0.27350785 | conserved  | conserved |
| USP47  | 2.44842597 | 0.33067044 | conserved  | conserved |
| USP48  | 1.29105584 | 0.27666842 | conserved  | conserved |
| USP49  | 0.14764298 | 0.06063305 | conserved  | conserved |
| USP5   | 0.2199424  | 0.35210592 | conserved  | conserved |
| USP50  | 0.02218852 | 0.78881151 | conserved  | conserved |
| USP51  | 0.07691013 | 0.0924724  | conserved  | conserved |
| USP53  | 0.79819448 | 0.21446811 | conserved  | conserved |
| USP54  | 5.6358986  | 0.14519514 | monkey-NSC | conserved |
| USP7   | 0.30618361 | 0.36974195 | conserved  | conserved |
| USP8   | 0.65646842 | 0.40976202 | conserved  | conserved |
| USPL1  | 0.2579954  | 0.17259012 | conserved  | conserved |
| UST    | 1.89070883 | 0.02586598 | conserved  | conserved |
| UTP15  | 0.04818504 | 0.11911252 | conserved  | conserved |
| UTP18  | 0.22689808 | 0.3448469  | conserved  | conserved |
| UTP20  | 0.47692822 | 0.11739238 | conserved  | conserved |
| UTP23  | 0.23578093 | 0.23394369 | conserved  | conserved |
| UTP6   | 0.42877477 | 0.17747425 | conserved  | conserved |
| UTRN   | 2.28324218 | 0.15853436 | conserved  | conserved |
| UTS2   | 0.05960947 | 0          | conserved  | conserved |
| UTS2B  | 0.0102408  | 0          | conserved  | conserved |
| UVRAG  | 2.06529721 | 0.11637859 | conserved  | conserved |
| UXS1   | 0.57918113 | 0.33258217 | conserved  | conserved |
| VAC14  | 0.89462419 | 0.14341927 | conserved  | conserved |
| VAMP1  | 0.1107476  | 0.06418566 | conserved  | conserved |
| VAMP3  | 0.16211068 | 0.8370767  | conserved  | conserved |
| VAMP4  | 0.23013407 | 0.61845973 | conserved  | conserved |
| VAMP5  | 0.09911744 | 0.05809064 | conserved  | conserved |
| VAMP8  | 0.00391524 | 0.5423789  | conserved  | conserved |
| VANGL1 | 0.05390891 | 0.13389074 | conserved  | conserved |
| VANGL2 | 0.51034202 | 0.52818847 | conserved  | conserved |
| VAPA   | 0.39750735 | 3.48081273 | mouse-RGL  | conserved |
| VARS2  | 0.25086639 | 0.0581285  | conserved  | conserved |

|         |            |            |            |           |
|---------|------------|------------|------------|-----------|
| VASH1   | 0.28631782 | 0.01854255 | conserved  | conserved |
| VASH2   | 0.04776026 | 0.08672279 | conserved  | conserved |
| VASP    | 0.14840087 | 0.38930526 | conserved  | conserved |
| VAT1    | 0.06676513 | 0.10975911 | conserved  | conserved |
| VAT1L   | 2.43644392 | 0.13413065 | conserved  | conserved |
| VAV1    | 0.02084259 | 0.00357637 | conserved  | conserved |
| VAV2    | 1.46473238 | 0.06188383 | monkey-NSC | conserved |
| VAV3    | 2.08041551 | 0.00988764 | monkey-NSC | conserved |
| VAX2    | 0.04643423 | 0          | conserved  | conserved |
| VCAM1   | 0.00840692 | 1.14622233 | conserved  | conserved |
| VCAN    | 1.20371243 | 1.28028111 | mouse-RGL  | conserved |
| VCP     | 0.39227602 | 1.27244987 | conserved  | conserved |
| VCIPI1  | 0.15143856 | 0.35197417 | conserved  | conserved |
| VCPKMT  | 0.17709564 | 0.18751642 | conserved  | conserved |
| VDAC2   | 0.36758055 | 2.07191598 | conserved  | conserved |
| VDAC3   | 0.39129554 | 1.93022838 | mouse-RGL  | conserved |
| VDR     | 0.00284613 | 0.00653431 | conserved  | conserved |
| VEGFB   | 0.42673998 | 0.33235739 | conserved  | conserved |
| VEGFC   | 0.00925175 | 0.13783296 | conserved  | conserved |
| VEPH1   | 0.16630103 | 0.81049491 | mouse-RGL  | conserved |
| VEZT    | 1.38024508 | 0.35720302 | conserved  | conserved |
| VGFB    | 0.0210847  | 0.02423545 | conserved  | conserved |
| VGLL3   | 0.02186795 | 0          | conserved  | conserved |
| VGLL4   | 2.83060092 | 1.26427131 | conserved  | conserved |
| VIL1    | 0.0299554  | 0          | conserved  | conserved |
| VILL    | 0.07392921 | 0          | conserved  | conserved |
| VIM     | 0.21506702 | 4.84583233 | mouse-RGL  | conserved |
| VIP     | 0.01597145 | 0.00553313 | conserved  | conserved |
| VIPAS39 | 0.38297267 | 0.3116998  | conserved  | conserved |
| VIPR1   | 0.02537321 | 0          | conserved  | conserved |
| VIPR2   | 0.02786117 | 0.00343136 | conserved  | conserved |
| VIT     | 0.98504707 | 0.11451924 | conserved  | conserved |
| VLDLR   | 0.0919362  | 0.44125423 | conserved  | conserved |
| VMO1    | 0.01471956 | 0.00330084 | conserved  | conserved |
| VNN1    | 0.00090517 | 0.15727494 | conserved  | conserved |
| VPREB3  | 0          | 0          | conserved  | conserved |
| VPS11   | 0.27079398 | 0.15208921 | conserved  | conserved |
| VPS13A  | 1.372148   | 0.10788014 | conserved  | conserved |
| VPS13B  | 5.35258366 | 0.12157204 | monkey-NSC | conserved |
| VPS13C  | 2.54164934 | 0.04815328 | conserved  | conserved |
| VPS13D  | 2.2756211  | 0.19081765 | conserved  | conserved |

|        |            |            |           |           |
|--------|------------|------------|-----------|-----------|
| VPS16  | 0.17726348 | 0.17191173 | conserved | conserved |
| VPS18  | 0.08325243 | 0.10908248 | conserved | conserved |
| VPS25  | 0.07059543 | 0.06231161 | conserved | conserved |
| VPS26A | 0.49864085 | 0.40734834 | conserved | conserved |
| VPS26B | 0.10941804 | 0.4006658  | conserved | conserved |
| VPS29  | 0.24164184 | 1.44861856 | mouse-RGL | conserved |
| VPS36  | 0.62020864 | 0.59687461 | conserved | conserved |
| VPS37A | 0.30001919 | 0.51376275 | conserved | conserved |
| VPS37B | 0.5740699  | 1.36506638 | conserved | conserved |
| VPS37D | 0.04872801 | 0.10126009 | conserved | conserved |
| VPS39  | 1.12846099 | 0.18164256 | conserved | conserved |
| VPS41  | 1.00489652 | 0.24432201 | conserved | conserved |
| VPS45  | 0.90030884 | 0.22399117 | conserved | conserved |
| VPS4B  | 0.3882127  | 0.36540974 | conserved | conserved |
| VPS50  | 1.00770237 | 0.46913975 | conserved | conserved |
| VPS53  | 1.59132514 | 0.20694542 | conserved | conserved |
| VPS54  | 2.29574094 | 0.11819458 | conserved | conserved |
| VPS8   | 1.78568066 | 0.14649505 | conserved | conserved |
| VPS9D1 | 0.15957236 | 0.19048345 | conserved | conserved |
| VRK1   | 0.29436901 | 0.16284911 | conserved | conserved |
| VRK2   | 0.52030986 | 0.10488671 | conserved | conserved |
| VRK3   | 0.34542999 | 0.44885121 | conserved | conserved |
| VRTN   | 0          | 0          | conserved | conserved |
| VSIG1  | 0.02457763 | 0          | conserved | conserved |
| VSIG10 | 0.10697472 | 0.01991815 | conserved | conserved |
| VSIG4  | 0.00515658 | 0          | conserved | conserved |
| VSIG8  | 0.02741184 | 0          | conserved | conserved |
| VSIR   | 0.4014509  | 0          | conserved | conserved |
| VSNL1  | 0.41699886 | 0.07557167 | conserved | conserved |
| VSTM2A | 0.12513543 | 0.17829444 | conserved | conserved |
| VSTM2B | 0.03142975 | 0.0351367  | conserved | conserved |
| VSTM2L | 0.27217581 | 0.05475387 | conserved | conserved |
| VSTM4  | 0.11083377 | 0.03977005 | conserved | conserved |
| VSX2   | 0.01122069 | 0          | conserved | conserved |
| VTA1   | 0.864046   | 0.55992161 | conserved | conserved |
| VTCN1  | 0.01817443 | 0          | conserved | conserved |
| VTI1B  | 0.31310448 | 0.86455386 | conserved | conserved |
| VWA2   | 0.00880054 | 0          | conserved | conserved |
| VWA3A  | 0.24953967 | 0.00683394 | conserved | conserved |
| VWA3B  | 0.22317143 | 0.00759574 | conserved | conserved |
| VWA5B1 | 0.0189999  | 0          | conserved | conserved |

|        |            |            |            |           |
|--------|------------|------------|------------|-----------|
| VWA5B2 | 0.03604341 | 0.00296916 | conserved  | conserved |
| VWA7   | 0.00667728 | 0.00501501 | conserved  | conserved |
| VWA8   | 1.90761414 | 0.06796272 | monkey-NSC | conserved |
| VWC2   | 0.18755103 | 0.01996798 | conserved  | conserved |
| VWC2L  | 0.17586785 | 0.0025805  | conserved  | conserved |
| VWF    | 0.14910665 | 0.0028576  | conserved  | conserved |
| WAC    | 2.64494882 | 1.22648154 | conserved  | conserved |
| WAPL   | 1.19748057 | 0.51523378 | conserved  | conserved |
| WARS2  | 0.47179025 | 0.08302609 | conserved  | conserved |
| WAS    | 0.04066128 | 0.00396223 | conserved  | conserved |
| WASF1  | 0.84640863 | 0.33575306 | conserved  | conserved |
| WASF2  | 0.63212561 | 0.52295485 | conserved  | conserved |
| WASF3  | 2.23294234 | 0.34247574 | conserved  | conserved |
| WASL   | 0.96351878 | 0.50734835 | conserved  | conserved |
| WBP1   | 0.30047661 | 1.09738738 | conserved  | conserved |
| WBP2   | 0.45953863 | 1.07110012 | conserved  | conserved |
| WBP2NL | 0.0772432  | 0          | conserved  | conserved |
| WBP4   | 0.60552089 | 1.19771577 | conserved  | conserved |
| WDFY2  | 3.36744832 | 0.00121328 | conserved  | conserved |
| WDFY3  | 6.41709722 | 0.32615634 | monkey-NSC | conserved |
| WDFY4  | 0.02229634 | 0          | conserved  | conserved |
| WDHD1  | 0.1007209  | 0.09273311 | conserved  | conserved |
| WDPCP  | 3.72026092 | 0.06008991 | conserved  | conserved |
| WDR1   | 0.21818009 | 1.43738563 | mouse-RGL  | conserved |
| WDR11  | 0.70082885 | 0.10183026 | conserved  | conserved |
| WDR13  | 0.28390073 | 0.35085834 | conserved  | conserved |
| WDR17  | 0.69058474 | 0.02543179 | conserved  | conserved |
| WDR19  | 0.70815314 | 0.11504117 | conserved  | conserved |
| WDR24  | 0.11060815 | 0.09101451 | conserved  | conserved |
| WDR25  | 0.39046564 | 0.0133853  | conserved  | conserved |
| WDR26  | 0.69513416 | 0.83326931 | conserved  | conserved |
| WDR27  | 0.83561319 | 0          | conserved  | conserved |
| WDR3   | 0.27876764 | 0.10227116 | conserved  | conserved |
| WDR31  | 0.14498552 | 0.10806812 | conserved  | conserved |
| WDR33  | 1.7827142  | 0.29844585 | conserved  | conserved |
| WDR35  | 0.78464829 | 0.26054512 | conserved  | conserved |
| WDR36  | 0.3385184  | 0.11919844 | conserved  | conserved |
| WDR37  | 1.26282543 | 0.31938116 | conserved  | conserved |
| WDR38  | 0.00544878 | 0.0251425  | conserved  | conserved |
| WDR4   | 0.10249244 | 0.09142296 | conserved  | conserved |
| WDR41  | 0.78518956 | 0.21793467 | conserved  | conserved |

|         |            |            |            |           |
|---------|------------|------------|------------|-----------|
| WDR43   | 0.61528225 | 0.53530613 | conserved  | conserved |
| WDR44   | 0.52832924 | 0.04538385 | conserved  | conserved |
| WDR46   | 0.18167768 | 0.18040746 | conserved  | conserved |
| WDR47   | 0.53181496 | 0.21545153 | conserved  | conserved |
| WDR48   | 0.53526734 | 0.17873311 | conserved  | conserved |
| WDR5    | 0.40372044 | 0.23361579 | conserved  | conserved |
| WDR53   | 0.06788917 | 0.12484403 | conserved  | conserved |
| WDR54   | 0.23721552 | 0.05782843 | conserved  | conserved |
| WDR59   | 1.20335752 | 0.0682146  | conserved  | conserved |
| WDR6    | 0.19413757 | 0.5187202  | conserved  | conserved |
| WDR61   | 0.21846622 | 1.08376672 | conserved  | conserved |
| WDR62   | 0.04432738 | 0.01070037 | conserved  | conserved |
| WDR64   | 0.074098   | 0          | conserved  | conserved |
| WDR7    | 2.93727576 | 0.21969927 | conserved  | conserved |
| WDR70   | 3.55617259 | 0.19225064 | conserved  | conserved |
| WDR72   | 0.05722048 | 0          | conserved  | conserved |
| WDR73   | 0.21495038 | 0.17976435 | conserved  | conserved |
| WDR74   | 0.17009961 | 0.28143154 | conserved  | conserved |
| WDR75   | 0.37827613 | 0.16623672 | conserved  | conserved |
| WDR76   | 0.0321837  | 0.07184621 | conserved  | conserved |
| WDR89   | 0.07654636 | 1.35684812 | conserved  | conserved |
| WDR91   | 0.16839938 | 0.1894268  | conserved  | conserved |
| WDR92   | 0.23043323 | 0.09623069 | conserved  | conserved |
| WDSUB1  | 0.7608401  | 0.19439429 | conserved  | conserved |
| WDTC1   | 0.567139   | 0.31640387 | conserved  | conserved |
| WEE1    | 0.04165904 | 0.0338703  | conserved  | conserved |
| WEE2    | 0.01654783 | 0          | conserved  | conserved |
| WFDC1   | 0.02939699 | 0.00590822 | conserved  | conserved |
| WFDC2   | 0.00591081 | 0          | conserved  | conserved |
| WFDC5   | 0          | 0          | conserved  | conserved |
| WFIKKN2 | 0.0107894  | 0.01896195 | conserved  | conserved |
| WFS1    | 0.43922886 | 0.08677584 | conserved  | conserved |
| WHAMM   | 0.38589762 | 0.22854332 | conserved  | conserved |
| WHRN    | 0.20076687 | 0.11908504 | conserved  | conserved |
| WIF1    | 4.06912016 | 0.03486214 | monkey-NSC | conserved |
| WIPF1   | 0.48674612 | 0.06112948 | conserved  | conserved |
| WIPF2   | 2.35427372 | 0.19740043 | monkey-NSC | conserved |
| WIPF3   | 0.15884445 | 0.10531593 | conserved  | conserved |
| WIPI1   | 0.18876976 | 0.62804787 | conserved  | conserved |
| WIPI2   | 0.4214621  | 0.66058746 | conserved  | conserved |
| WLS     | 1.85516847 | 0.17940543 | monkey-NSC | conserved |

|         |            |            |            |           |
|---------|------------|------------|------------|-----------|
| WNK1    | 3.07878581 | 0.98167883 | conserved  | conserved |
| WNK3    | 0.79326458 | 0.0781975  | conserved  | conserved |
| WNT1    | 0.00135835 | 0          | conserved  | conserved |
| WNT11   | 0.00167741 | 0          | conserved  | conserved |
| WNT16   | 0.00566517 | 0          | conserved  | conserved |
| WNT2    | 0.00404319 | 0          | conserved  | conserved |
| WNT2B   | 0.14053636 | 0          | conserved  | conserved |
| WNT3    | 0.12928144 | 0.02617096 | conserved  | conserved |
| WNT5A   | 0.00714048 | 0.28421225 | conserved  | conserved |
| WNT7A   | 0.33777227 | 0.28370615 | conserved  | conserved |
| WNT7B   | 0.09323311 | 0.71927184 | conserved  | conserved |
| WNT8A   | 0.00822439 | 0          | conserved  | conserved |
| WNT8B   | 0.00215284 | 0.55233777 | conserved  | conserved |
| WNT9A   | 0.09523345 | 0.01538438 | conserved  | conserved |
| WNT9B   | 0          | 0          | conserved  | conserved |
| WRAP53  | 0.23773898 | 0.13023785 | conserved  | conserved |
| WRN     | 2.32837946 | 0.1006564  | conserved  | conserved |
| WRNIP1  | 0.28818424 | 0.19481617 | conserved  | conserved |
| WSB1    | 2.67930586 | 1.1030832  | conserved  | conserved |
| WSCD1   | 0.63338399 | 0.9532094  | conserved  | conserved |
| WSCD2   | 0.10394089 | 0.25335826 | conserved  | conserved |
| WT1     | 0          | 0          | conserved  | conserved |
| WWC1    | 4.18402378 | 0.33458355 | monkey-NSC | conserved |
| WWC2    | 1.10410129 | 0.10855661 | conserved  | conserved |
| WWOX    | 17.1592942 | 0.20267906 | conserved  | conserved |
| WWP2    | 0.55254838 | 0.11807593 | conserved  | conserved |
| WWTR1   | 0.4657148  | 0.42697944 | conserved  | conserved |
| XAB2    | 0.02882984 | 0.10264711 | conserved  | conserved |
| XAF1    | 0.03252919 | 0.05255204 | conserved  | conserved |
| XCR1    | 0          | 0          | conserved  | conserved |
| XDH     | 0.01155286 | 0          | conserved  | conserved |
| XIAP    | 0.83533284 | 0.41581196 | conserved  | conserved |
| XIRP2   | 0.23695225 | 0          | conserved  | conserved |
| XK      | 0.02926043 | 0.05345609 | conserved  | conserved |
| XKR4    | 2.00238864 | 0.00405985 | conserved  | conserved |
| XKR5    | 0.08437854 | 0          | conserved  | conserved |
| XKR9    | 0.01057928 | 0          | conserved  | conserved |
| XKRX    | 0.04731238 | 0.01160546 | conserved  | conserved |
| XPA     | 0.57839875 | 0.47494102 | conserved  | conserved |
| XPC     | 0.46809736 | 0.12450762 | conserved  | conserved |
| XPNPEP1 | 0.76509157 | 0.50954496 | conserved  | conserved |

|         |            |            |            |           |
|---------|------------|------------|------------|-----------|
| XPNPEP2 | 0.00410534 | 0          | conserved  | conserved |
| XPNPEP3 | 0.72859392 | 0.07422913 | conserved  | conserved |
| XPO1    | 1.73895936 | 0.42922231 | conserved  | conserved |
| XPO4    | 0.85080182 | 0.26925    | conserved  | conserved |
| XPO5    | 0.64479128 | 0.00825773 | conserved  | conserved |
| XPO6    | 1.29131997 | 0.36334804 | conserved  | conserved |
| XPO7    | 0.74728904 | 0.31329739 | conserved  | conserved |
| XPOT    | 0.34803873 | 0.37045763 | conserved  | conserved |
| XPR1    | 3.22861027 | 0.84724133 | monkey-NSC | conserved |
| XRCC1   | 0.09731777 | 0.20237209 | conserved  | conserved |
| XRCC2   | 0.05728701 | 0.05894285 | conserved  | conserved |
| XRCC5   | 1.54009068 | 0.41638694 | conserved  | conserved |
| XRN1    | 1.79323846 | 0.25136452 | conserved  | conserved |
| XRN2    | 0.64683705 | 0.70215178 | conserved  | conserved |
| XRRA1   | 0.11082506 | 0.00971364 | conserved  | conserved |
| XXYLT1  | 0.53824185 | 0.02618507 | conserved  | conserved |
| XYLB    | 0.35607937 | 0.0200565  | conserved  | conserved |
| XYLT1   | 4.81158138 | 0.43483076 | monkey-NSC | conserved |
| YAF2    | 2.1646565  | 1.0315474  | conserved  | conserved |
| YAP1    | 1.67266264 | 0.37096375 | conserved  | conserved |
| YARS2   | 0.08240722 | 0.10237488 | conserved  | conserved |
| YBX3    | 0.10616208 | 0.4754705  | conserved  | conserved |
| YEATS2  | 1.11985921 | 0.33373731 | conserved  | conserved |
| YEATS4  | 0.08237893 | 1.04055963 | mouse-RGL  | conserved |
| YES1    | 0.25102696 | 0.32229186 | conserved  | conserved |
| YIF1A   | 0.07656427 | 0.93008565 | conserved  | conserved |
| YIF1B   | 0.14384172 | 0.47535791 | conserved  | conserved |
| YIPF3   | 0.1466438  | 0.55749588 | conserved  | conserved |
| YIPF4   | 0.28839084 | 0.91516787 | conserved  | conserved |
| YIPF5   | 0.1823858  | 0.80574377 | conserved  | conserved |
| YIPF6   | 0.27647809 | 0.36422164 | conserved  | conserved |
| YLPM1   | 1.03392787 | 0.43834783 | conserved  | conserved |
| YME1L1  | 0.85089035 | 0.55440876 | conserved  | conserved |
| YOD1    | 0.00445278 | 0.43734519 | conserved  | conserved |
| YPEL4   | 0.08601433 | 0.08882655 | conserved  | conserved |
| YPEL5   | 0.22757753 | 0.43930629 | conserved  | conserved |
| YRDC    | 0.01414027 | 0.39891961 | conserved  | conserved |
| YTHDC1  | 0.83724929 | 0.82404114 | conserved  | conserved |
| YTHDF1  | 0.26157235 | 0.26396566 | conserved  | conserved |
| YTHDF2  | 0.44160396 | 0.56644078 | conserved  | conserved |
| YTHDF3  | 0.73638931 | 0.49465841 | conserved  | conserved |

|        |            |            |           |           |
|--------|------------|------------|-----------|-----------|
| YWHAB  | 0.76231952 | 2.39494287 | mouse-RGL | conserved |
| YWHAG  | 0.83236045 | 1.10568975 | conserved | conserved |
| YWHAH  | 0.67438291 | 2.06408708 | mouse-RGL | conserved |
| YY1    | 0.70863181 | 0.48373463 | conserved | conserved |
| ZADH2  | 0.22837784 | 0.10727202 | conserved | conserved |
| ZAP70  | 0.00058537 | 0          | conserved | conserved |
| ZAR1   | 0.00291604 | 0.00674723 | conserved | conserved |
| ZAR1L  | 0.00065512 | 0          | conserved | conserved |
| ZBBX   | 0.00607163 | 0          | conserved | conserved |
| ZBED4  | 0.00554081 | 0.06749439 | conserved | conserved |
| ZBP1   | 0.00205481 | 0.00420968 | conserved | conserved |
| ZBTB1  | 0.5232897  | 0.22786046 | conserved | conserved |
| ZBTB10 | 0.1367066  | 0.10344214 | conserved | conserved |
| ZBTB11 | 0.24950981 | 0.14942895 | conserved | conserved |
| ZBTB12 | 0.0018382  | 0.10903751 | conserved | conserved |
| ZBTB14 | 0.07088757 | 0.18080194 | conserved | conserved |
| ZBTB16 | 3.12002239 | 0.01169535 | conserved | conserved |
| ZBTB17 | 0.1667635  | 0.07176762 | conserved | conserved |
| ZBTB2  | 0.05899782 | 0.06049445 | conserved | conserved |
| ZBTB20 | 8.62531518 | 22.4087018 | conserved | conserved |
| ZBTB21 | 0.13010021 | 0.07417042 | conserved | conserved |
| ZBTB22 | 0.02155198 | 0.21424902 | conserved | conserved |
| ZBTB24 | 0.0747265  | 0.10573605 | conserved | conserved |
| ZBTB25 | 0.44371522 | 0.17332179 | conserved | conserved |
| ZBTB26 | 0.07657887 | 0.11629509 | conserved | conserved |
| ZBTB3  | 0.00903499 | 0.01311898 | conserved | conserved |
| ZBTB33 | 0.03032648 | 0.14414409 | conserved | conserved |
| ZBTB34 | 0.06947963 | 0.09833697 | conserved | conserved |
| ZBTB37 | 0.07575799 | 0.18959189 | conserved | conserved |
| ZBTB38 | 0.52456357 | 0.24030396 | conserved | conserved |
| ZBTB39 | 0.02191209 | 0.06503042 | conserved | conserved |
| ZBTB4  | 1.27106513 | 0.37828895 | conserved | conserved |
| ZBTB40 | 0.37787311 | 0.0420834  | conserved | conserved |
| ZBTB43 | 0.33554714 | 0.06781829 | conserved | conserved |
| ZBTB44 | 0.49153362 | 0.13499276 | conserved | conserved |
| ZBTB46 | 0.28766903 | 0.01329734 | conserved | conserved |
| ZBTB48 | 0.24054603 | 0.04849517 | conserved | conserved |
| ZBTB49 | 0.19337823 | 0.01623143 | conserved | conserved |
| ZBTB5  | 0.33606533 | 0.14934138 | conserved | conserved |
| ZBTB6  | 0.01500528 | 0.14730797 | conserved | conserved |
| ZBTB7B | 0.08643762 | 0.03683318 | conserved | conserved |



|         |            |            |           |           |
|---------|------------|------------|-----------|-----------|
| ZBTB8OS | 1.06586954 | 0.25132181 | conserved | conserved |
| ZC2HC1A | 1.22277684 | 0.30523064 | conserved | conserved |
| ZC2HC1C | 0.21937959 | 0.02183852 | conserved | conserved |
| ZC3H12A | 0.00947535 | 0.00290081 | conserved | conserved |
| ZC3H12B | 0.13956888 | 0.04613897 | conserved | conserved |
| ZC3H12C | 1.04168216 | 0.02224067 | conserved | conserved |
| ZC3H14  | 0.7151476  | 0.65833705 | conserved | conserved |
| ZC3H15  | 0.37280634 | 1.45352242 | conserved | conserved |
| ZC3H18  | 0.82477224 | 0.26399132 | conserved | conserved |
| ZC3H6   | 0.7631902  | 0.30648712 | conserved | conserved |
| ZC3H7A  | 0.62824877 | 0.30920676 | conserved | conserved |
| ZC3H7B  | 0.77488766 | 0.45221716 | conserved | conserved |
| ZC3H8   | 0.14990838 | 0.11529505 | conserved | conserved |
| ZC3HAV1 | 0.06356711 | 0.03554241 | conserved | conserved |
| ZC3HC1  | 0.44736283 | 0.28218768 | conserved | conserved |
| ZC4H2   | 0.38503401 | 0.1795864  | conserved | conserved |
| ZCCHC14 | 1.09551502 | 0.22248351 | conserved | conserved |
| ZCCHC17 | 0.80014129 | 1.37476364 | conserved | conserved |
| ZCCHC2  | 0.46830197 | 0.07440348 | conserved | conserved |
| ZCCHC24 | 0.99121187 | 1.149326   | conserved | conserved |
| ZCCHC3  | 0.05977709 | 0.33000196 | conserved | conserved |
| ZCCHC8  | 0.29209831 | 0.15755205 | conserved | conserved |
| ZCCHC9  | 0.17129091 | 0.63603866 | conserved | conserved |
| ZCWPW1  | 0.24102755 | 0.06835146 | conserved | conserved |
| ZDBF2   | 0.68928949 | 0.15512419 | conserved | conserved |
| ZDHHC1  | 0.03718197 | 0.15233628 | conserved | conserved |
| ZDHHC12 | 0.01077344 | 0.14319378 | conserved | conserved |
| ZDHHC13 | 0.25860743 | 0.14657629 | conserved | conserved |
| ZDHHC14 | 1.37552872 | 0.02037404 | conserved | conserved |
| ZDHHC15 | 0.29955507 | 0.02091669 | conserved | conserved |
| ZDHHC16 | 0.09750225 | 0.31795419 | conserved | conserved |
| ZDHHC17 | 1.09522947 | 0.15496983 | conserved | conserved |
| ZDHHC2  | 0.19680119 | 0.17526922 | conserved | conserved |
| ZDHHC20 | 1.46262952 | 0.80676124 | conserved | conserved |
| ZDHHC21 | 0.69870102 | 0.58243924 | conserved | conserved |
| ZDHHC22 | 0.13537579 | 0          | conserved | conserved |
| ZDHHC23 | 0.17785963 | 0          | conserved | conserved |
| ZDHHC24 | 0.1588677  | 0.10298275 | conserved | conserved |
| ZDHHC4  | 0.10168649 | 0.48135639 | conserved | conserved |
| ZDHHC6  | 0.11873341 | 0.51320429 | conserved | conserved |
| ZDHHC7  | 0.37867414 | 0.15397487 | conserved | conserved |

|         |            |            |            |           |
|---------|------------|------------|------------|-----------|
| ZDHHC9  | 0.09944881 | 0.11660963 | conserved  | conserved |
| ZEB1    | 4.42009633 | 1.16149895 | conserved  | conserved |
| ZEB2    | 5.59442315 | 1.29339719 | conserved  | conserved |
| ZER1    | 0.51100067 | 0.24415573 | conserved  | conserved |
| ZFAND2B | 0.04594892 | 0.36728979 | conserved  | conserved |
| ZFAND3  | 6.34350424 | 0.50473105 | conserved  | conserved |
| ZFAND4  | 0.56055546 | 0.09113242 | conserved  | conserved |
| ZFAND6  | 1.34107367 | 1.80580408 | conserved  | conserved |
| ZFAT    | 0.47768456 | 0.01282964 | conserved  | conserved |
| ZFC3H1  | 0.86135198 | 0.20199631 | conserved  | conserved |
| ZFHX2   | 0.87802835 | 0.2056991  | conserved  | conserved |
| ZFHX3   | 0.66173002 | 0.06786974 | conserved  | conserved |
| ZFHX4   | 6.45603283 | 0.14273127 | monkey-NSC | conserved |
| ZFP1    | 0.32227158 | 0.15256952 | conserved  | conserved |
| ZFP14   | 0.6877151  | 0.06544883 | conserved  | conserved |
| ZFP2    | 0.47461613 | 0.2803337  | conserved  | conserved |
| ZFP28   | 0.0714998  | 0.04888415 | conserved  | conserved |
| ZFP3    | 0.07877804 | 0.05833695 | conserved  | conserved |
| ZFP30   | 0.70634221 | 0.39107628 | conserved  | conserved |
| ZFP36   | 0.08586608 | 0.17482189 | conserved  | conserved |
| ZFP36L1 | 1.49405321 | 4.40944773 | mouse-RGL  | conserved |
| ZFP37   | 0.25732408 | 0.16527555 | conserved  | conserved |
| ZFP57   | 0.00123965 | 0.08856784 | conserved  | conserved |
| ZFP62   | 0.1327297  | 0.23818946 | conserved  | conserved |
| ZFP64   | 0.34574256 | 0.18553384 | conserved  | conserved |
| ZFP82   | 0.13405265 | 0.00335512 | conserved  | conserved |
| ZFP90   | 1.32667613 | 0.15190544 | conserved  | conserved |
| ZFPM2   | 7.69275464 | 0.11463859 | conserved  | conserved |
| ZFR     | 2.61504074 | 0.90472238 | conserved  | conserved |
| ZFX     | 0.73384187 | 0.23801635 | conserved  | conserved |
| ZFYVE1  | 0.31262024 | 0.02638131 | conserved  | conserved |
| ZFYVE19 | 0.09883072 | 0.27760612 | conserved  | conserved |
| ZFYVE21 | 0.59065224 | 0.81800669 | conserved  | conserved |
| ZFYVE26 | 0.51990519 | 0.0588933  | conserved  | conserved |
| ZFYVE27 | 0.27410219 | 0.17803165 | conserved  | conserved |
| ZGPAT   | 0.30444044 | 0.12497928 | conserved  | conserved |
| ZHX1    | 0.05904444 | 0.54817036 | conserved  | conserved |
| ZHX2    | 7.38145727 | 0.30013746 | monkey-NSC | conserved |
| ZHX3    | 8.86751576 | 0.26067166 | conserved  | conserved |
| ZIC1    | 0.08291761 | 0.6166547  | conserved  | conserved |
| ZIC2    | 0.20734753 | 0.09602778 | conserved  | conserved |

|          |            |            |            |           |
|----------|------------|------------|------------|-----------|
| ZIC3     | 0          | 0.04252475 | conserved  | conserved |
| ZIC4     | 0.0751227  | 0.30196841 | conserved  | conserved |
| ZIC5     | 0.15203864 | 1.20006208 | conserved  | conserved |
| ZIK1     | 0.06363467 | 0.15941366 | conserved  | conserved |
| ZKSCAN1  | 1.02179322 | 0.62167269 | conserved  | conserved |
| ZKSCAN2  | 0.16750979 | 0.05922093 | conserved  | conserved |
| ZKSCAN5  | 0.39766661 | 0.09450048 | conserved  | conserved |
| ZKSCAN8  | 0.1513523  | 0.1848941  | conserved  | conserved |
| ZMAT1    | 0.93473569 | 0.1884304  | conserved  | conserved |
| ZMAT2    | 0.13598295 | 1.31281793 | conserved  | conserved |
| ZMAT3    | 0.15091408 | 0.3585973  | conserved  | conserved |
| ZMIZ1    | 3.13406168 | 1.33190087 | conserved  | conserved |
| ZMIZ2    | 0.20663288 | 0.36556955 | conserved  | conserved |
| ZMPSTE24 | 0.44038037 | 0.36601398 | conserved  | conserved |
| ZMYM2    | 3.37605225 | 0.24869258 | conserved  | conserved |
| ZMYM3    | 0.32053483 | 0.24376399 | conserved  | conserved |
| ZMYM4    | 2.80537233 | 0.46057516 | conserved  | conserved |
| ZMYND10  | 0.02994006 | 0.01586535 | conserved  | conserved |
| ZMYND11  | 2.83124246 | 0.87604776 | conserved  | conserved |
| ZMYND12  | 0.25658548 | 0.01462748 | conserved  | conserved |
| ZMYND15  | 0.00095704 | 0.01102356 | conserved  | conserved |
| ZMYND8   | 4.72448069 | 0.40267044 | monkey-NSC | conserved |
| ZNHIT1   | 0.12443812 | 1.11975771 | conserved  | conserved |
| ZNHIT6   | 0.69088528 | 0.21741614 | conserved  | conserved |
| ZNRF1    | 0.65761746 | 0.28531366 | conserved  | conserved |
| ZNRF2    | 0.40550085 | 0.17899836 | conserved  | conserved |
| ZNRF3    | 9.04820112 | 0.51308789 | monkey-NSC | conserved |
| ZP1      | 0.0014765  | 0          | conserved  | conserved |
| ZP2      | 0          | 0          | conserved  | conserved |
| ZPBP2    | 0.00238534 | 0.00386803 | conserved  | conserved |
| ZPLD1    | 0          | 0          | conserved  | conserved |
| ZRANB1   | 0.54460006 | 0.71564621 | conserved  | conserved |
| ZRANB3   | 2.42011531 | 0.04808724 | conserved  | conserved |
| ZSCAN12  | 0.08811228 | 0.0782616  | conserved  | conserved |
| ZSCAN2   | 0.14558236 | 0.02924178 | conserved  | conserved |
| ZSCAN20  | 0.0604728  | 0.02160402 | conserved  | conserved |
| ZSCAN21  | 0.27547766 | 0.18752025 | conserved  | conserved |
| ZSCAN22  | 0.04074327 | 0.11001681 | conserved  | conserved |
| ZSCAN25  | 0.12961475 | 0.00231094 | conserved  | conserved |
| ZSCAN26  | 0.41074999 | 0.36232244 | conserved  | conserved |
| ZSCAN29  | 0.13951223 | 0.13578318 | conserved  | conserved |

|        |            |            |            |           |
|--------|------------|------------|------------|-----------|
| ZSWIM1 | 0.00796904 | 0.12930034 | conserved  | conserved |
| ZSWIM2 | 0.01034342 | 0          | conserved  | conserved |
| ZSWIM4 | 0.20356105 | 0.04750955 | conserved  | conserved |
| ZSWIM5 | 2.44802389 | 0.05420419 | monkey-NSC | conserved |
| ZSWIM6 | 6.62375918 | 0.08576853 | monkey-NSC | conserved |
| ZSWIM7 | 0.49537661 | 0.3596578  | conserved  | conserved |
| ZSWIM8 | 1.41067442 | 0.2291643  | conserved  | conserved |
| ZW10   | 0.25672213 | 0.07990554 | conserved  | conserved |
| ZWILCH | 0.02828424 | 0.01392709 | conserved  | conserved |
| ZWINT  | 0.00552578 | 1.28745053 | conserved  | conserved |
| ZXDC   | 0.80655626 | 0.10769498 | conserved  | conserved |
| ZYG11A | 0.11418831 | 0          | conserved  | conserved |
| ZYX    | 0.18336496 | 0.21288851 | conserved  | conserved |
