# Supplementary material
Source: PubMed Central journal article supplement (PMC9343414)
Supplement: 41422_2022_678_MOESM20_ESM.pdf [file 41422_2022_678_MOESM20_ESM.pdf]

**Supplementary information****TableS6. Summary of sample information for humans**

| Patient ID | Gender | Age | Couse of death      | Diagnose               | Death time      | PMD (hours) | Experimental use      |
|------------|--------|-----|---------------------|------------------------|-----------------|-------------|-----------------------|
| PTB229     | F      | 52  | Respiratory failure | Uterine tumors         | 2/19/2019 14:16 | 22.7        | IF                    |
| PTB298     | M      | 67  | Rectal cancer       | Intestinal obstruction | 8/22/2020 18:50 | 5           | RNA-seq, IF, ATAC-seq |
| PTB218     | M      | 78  | Pulmonary Infection |                        | 9/4/2018 2:46   | 13.5        | IF                    |
| PTB202     | F      | 85  |                     | Coma one week          | 1/10/2018 16:00 | 20.5        | RNA-seq, IF, ATAC-seq |
| PTB215     | M      | 87  | Organ Failure       | Arteriosclerosis       | 7/5/2018 3:10   | 9           | RNA-seq, ATAC-seq     |
| PTB234     | M      | 92  | Respiratory failure | Arteriosclerosis       | 4/26/2019 9:15  | 6           | RNA-seq               |
