# Supplementary material
Source: PubMed Central journal article supplement (PMC9343414)
Supplement: 41422_2022_678_MOESM21_ESM.pdf [file 41422_2022_678_MOESM21_ESM.pdf]

**Supplementary information**

**TableS7. Differentially expressed genes among major cell types of human hippocampus**

|  | p_val     | avg_log2FC | pct.1 | pct.2 | p_val_adj | cluster |
|--|-----------|------------|-------|-------|-----------|---------|
|  | 5.28E-180 | 0.94524013 | 0.469 | 0.204 | 1.49E-175 | CA1     |
|  | 1.75E-278 | 1.00198507 | 0.988 | 0.837 | 4.95E-274 | CA1     |
|  | 5.75E-304 | 1.20665395 | 0.589 | 0.23  | 1.63E-299 | CA1     |
|  | 0         | 2.14901117 | 0.894 | 0.335 | 0         | CA1     |
|  | 0         | 2.10791503 | 0.561 | 0.128 | 0         | CA1     |
|  | 0         | 2.01142082 | 0.341 | 0.037 | 0         | CA1     |
|  | 0         | 1.97174888 | 0.998 | 0.504 | 0         | CA1     |
|  | 0         | 1.95968386 | 0.654 | 0.267 | 0         | CA1     |
|  | 0         | 1.91152867 | 0.869 | 0.197 | 0         | CA1     |
|  | 0         | 1.858088   | 0.923 | 0.478 | 0         | CA1     |
|  | 0         | 1.84132103 | 0.849 | 0.16  | 0         | CA1     |
|  | 0         | 1.79030096 | 0.976 | 0.532 | 0         | CA1     |
|  | 0         | 1.77587355 | 0.989 | 0.448 | 0         | CA1     |
|  | 0         | 1.72779544 | 0.948 | 0.38  | 0         | CA1     |
|  | 0         | 1.7269703  | 0.954 | 0.434 | 0         | CA1     |
|  | 0         | 1.70605473 | 0.844 | 0.341 | 0         | CA1     |
|  | 0         | 1.69789538 | 0.582 | 0.141 | 0         | CA1     |
|  | 0         | 1.65585257 | 0.715 | 0.117 | 0         | CA1     |
|  | 0         | 1.64711436 | 0.983 | 0.312 | 0         | CA1     |
|  | 0         | 1.64458113 | 0.91  | 0.328 | 0         | CA1     |
|  | 0         | 1.64407534 | 0.988 | 0.461 | 0         | CA1     |
|  | 0         | 1.62593985 | 0.759 | 0.168 | 0         | CA1     |
|  | 0         | 1.52278332 | 0.996 | 0.491 | 0         | CA1     |
|  | 0         | 1.51222236 | 0.992 | 0.626 | 0         | CA1     |
|  | 0         | 1.49594921 | 0.56  | 0.107 | 0         | CA1     |
|  | 0         | 1.47456012 | 0.934 | 0.325 | 0         | CA1     |
|  | 0         | 1.47167079 | 0.942 | 0.266 | 0         | CA1     |
|  | 0         | 1.46589463 | 1     | 0.783 | 0         | CA1     |
|  | 0         | 1.45890676 | 0.888 | 0.328 | 0         | CA1     |
|  | 0         | 1.40320282 | 0.859 | 0.167 | 0         | CA1     |
|  | 0         | 1.38818274 | 0.998 | 0.494 | 0         | CA1     |
|  | 0         | 1.38544443 | 0.632 | 0.198 | 0         | CA1     |
|  | 0         | 1.32006197 | 0.587 | 0.062 | 0         | CA1     |
|  | 0         | 1.31774779 | 0.853 | 0.107 | 0         | CA1     |
|  | 0         | 1.30587094 | 0.978 | 0.375 | 0         | CA1     |
|  | 0         | 1.29995279 | 0.835 | 0.144 | 0         | CA1     |
|  | 0         | 1.28514809 | 0.898 | 0.321 | 0         | CA1     |
|  | 0         | 1.27669715 | 0.256 | 0.021 | 0         | CA1     |

|  |   |            |       |       |   |     |
|--|---|------------|-------|-------|---|-----|
|  | 0 | 1.27281442 | 0.978 | 0.32  | 0 | CA1 |
|  | 0 | 1.26427521 | 0.902 | 0.264 | 0 | CA1 |
|  | 0 | 1.26230876 | 0.663 | 0.074 | 0 | CA1 |
|  | 0 | 1.23765564 | 0.855 | 0.163 | 0 | CA1 |
|  | 0 | 1.23286721 | 0.952 | 0.377 | 0 | CA1 |
|  | 0 | 1.22039782 | 0.992 | 0.456 | 0 | CA1 |
|  | 0 | 1.21054327 | 0.988 | 0.398 | 0 | CA1 |
|  | 0 | 1.20710802 | 0.744 | 0.179 | 0 | CA1 |
|  | 0 | 1.19505591 | 0.998 | 0.631 | 0 | CA1 |
|  | 0 | 1.18172278 | 0.748 | 0.165 | 0 | CA1 |
|  | 0 | 1.18105498 | 0.968 | 0.371 | 0 | CA1 |
|  | 0 | 1.17325863 | 1     | 0.628 | 0 | CA1 |
|  | 0 | 1.16589104 | 0.781 | 0.119 | 0 | CA1 |
|  | 0 | 1.14360716 | 0.976 | 0.546 | 0 | CA1 |
|  | 0 | 1.13262734 | 0.998 | 0.691 | 0 | CA1 |
|  | 0 | 1.12582845 | 0.637 | 0.25  | 0 | CA1 |
|  | 0 | 1.12538501 | 0.998 | 0.571 | 0 | CA1 |
|  | 0 | 1.1245637  | 0.95  | 0.278 | 0 | CA1 |
|  | 0 | 1.12103569 | 0.779 | 0.158 | 0 | CA1 |
|  | 0 | 1.11206625 | 0.937 | 0.289 | 0 | CA1 |
|  | 0 | 1.11099877 | 0.997 | 0.525 | 0 | CA1 |
|  | 0 | 1.10752335 | 0.998 | 0.54  | 0 | CA1 |
|  | 0 | 1.09650071 | 0.639 | 0.133 | 0 | CA1 |
|  | 0 | 1.0955004  | 0.974 | 0.443 | 0 | CA1 |
|  | 0 | 1.09434114 | 0.948 | 0.266 | 0 | CA1 |
|  | 0 | 1.08854445 | 0.95  | 0.335 | 0 | CA1 |
|  | 0 | 1.0882872  | 0.999 | 0.622 | 0 | CA1 |
|  | 0 | 1.08229659 | 1     | 0.568 | 0 | CA1 |
|  | 0 | 1.07540333 | 0.688 | 0.156 | 0 | CA1 |
|  | 0 | 1.07202123 | 0.985 | 0.477 | 0 | CA1 |
|  | 0 | 1.06372556 | 0.972 | 0.416 | 0 | CA1 |
|  | 0 | 1.05912889 | 0.885 | 0.414 | 0 | CA1 |
|  | 0 | 1.05894438 | 0.863 | 0.316 | 0 | CA1 |
|  | 0 | 1.05855539 | 0.973 | 0.344 | 0 | CA1 |
|  | 0 | 1.05711589 | 0.601 | 0.097 | 0 | CA1 |
|  | 0 | 1.05476726 | 0.999 | 0.554 | 0 | CA1 |
|  | 0 | 1.03976091 | 0.864 | 0.305 | 0 | CA1 |
|  | 0 | 1.02595166 | 0.896 | 0.208 | 0 | CA1 |
|  | 0 | 1.02321943 | 0.991 | 0.459 | 0 | CA1 |
|  | 0 | 1.01690335 | 0.999 | 0.543 | 0 | CA1 |
|  | 0 | 1.01020106 | 0.994 | 0.529 | 0 | CA1 |

|  |           |            |       |       |           |     |
|--|-----------|------------|-------|-------|-----------|-----|
|  | 0         | 1.00713993 | 0.989 | 0.639 | 0         | CA1 |
|  | 0         | 1.00435036 | 0.986 | 0.43  | 0         | CA1 |
|  | 0         | 0.99029477 | 0.995 | 0.486 | 0         | CA1 |
|  | 0         | 0.98571792 | 0.875 | 0.293 | 0         | CA1 |
|  | 0         | 0.9837902  | 0.494 | 0.138 | 0         | CA1 |
|  | 0         | 0.98151521 | 0.998 | 0.632 | 0         | CA1 |
|  | 0         | 0.9782088  | 0.999 | 0.753 | 0         | CA1 |
|  | 0         | 0.97772289 | 0.985 | 0.422 | 0         | CA1 |
|  | 0         | 0.97732203 | 0.996 | 0.634 | 0         | CA1 |
|  | 0         | 0.97062138 | 0.95  | 0.328 | 0         | CA1 |
|  | 0         | 0.96935681 | 0.832 | 0.23  | 0         | CA1 |
|  | 0         | 0.96226639 | 0.985 | 0.551 | 0         | CA1 |
|  | 0         | 0.96190004 | 1     | 0.882 | 0         | CA1 |
|  | 0         | 0.96011607 | 0.785 | 0.116 | 0         | CA1 |
|  | 0         | 0.95774948 | 0.924 | 0.294 | 0         | CA1 |
|  | 0         | 0.95153699 | 0.583 | 0.051 | 0         | CA1 |
|  | 0         | 0.9475287  | 1     | 0.719 | 0         | CA1 |
|  | 0         | 0.94196649 | 0.971 | 0.445 | 0         | CA1 |
|  | 0         | 0.94028132 | 0.992 | 0.388 | 0         | CA1 |
|  | 0         | 0.93835729 | 0.999 | 0.615 | 0         | CA1 |
|  | 0         | 0.93554409 | 0.951 | 0.353 | 0         | CA1 |
|  | 0         | 0.71631855 | 0.848 | 0.11  | 0         | CA1 |
|  | 1.79E-29  | 1.22005107 | 0.337 | 0.182 | 5.07E-25  | CA2 |
|  | 2.52E-117 | 1.8070746  | 0.745 | 0.441 | 7.12E-113 | CA2 |
|  | 4.97E-122 | 1.68792914 | 0.717 | 0.37  | 1.41E-117 | CA2 |
|  | 8.23E-126 | 1.71138251 | 0.639 | 0.269 | 2.33E-121 | CA2 |
|  | 4.43E-126 | 1.76915902 | 0.793 | 0.471 | 1.25E-121 | CA2 |
|  | 5.47E-127 | 1.71044719 | 0.819 | 0.572 | 1.55E-122 | CA2 |
|  | 3.34E-129 | 1.92780147 | 0.702 | 0.337 | 9.44E-125 | CA2 |
|  | 9.40E-132 | 1.68508567 | 0.611 | 0.228 | 2.66E-127 | CA2 |
|  | 2.06E-133 | 2.18234944 | 0.719 | 0.354 | 5.83E-129 | CA2 |
|  | 3.79E-135 | 1.68627997 | 0.737 | 0.366 | 1.07E-130 | CA2 |
|  | 7.61E-136 | 1.73947655 | 0.801 | 0.48  | 2.15E-131 | CA2 |
|  | 2.48E-136 | 1.71464157 | 0.801 | 0.477 | 7.01E-132 | CA2 |
|  | 1.33E-137 | 1.79421824 | 0.747 | 0.393 | 3.78E-133 | CA2 |
|  | 1.30E-137 | 1.72827519 | 0.778 | 0.44  | 3.69E-133 | CA2 |
|  | 2.99E-141 | 1.75465051 | 0.834 | 0.495 | 8.46E-137 | CA2 |
|  | 1.55E-143 | 1.68290458 | 0.812 | 0.45  | 4.40E-139 | CA2 |
|  | 1.37E-143 | 1.71316284 | 0.715 | 0.317 | 3.88E-139 | CA2 |
|  | 1.07E-148 | 1.72108866 | 0.767 | 0.362 | 3.02E-144 | CA2 |
|  | 3.90E-149 | 1.71915323 | 0.868 | 0.499 | 1.10E-144 | CA2 |

|  |           |            |       |       |           |     |
|--|-----------|------------|-------|-------|-----------|-----|
|  | 3.09E-150 | 1.79156184 | 0.745 | 0.355 | 8.74E-146 | CA2 |
|  | 3.19E-151 | 1.84549542 | 0.832 | 0.489 | 9.03E-147 | CA2 |
|  | 1.43E-151 | 1.70861248 | 0.847 | 0.537 | 4.05E-147 | CA2 |
|  | 4.24E-152 | 1.68805112 | 0.814 | 0.386 | 1.20E-147 | CA2 |
|  | 3.81E-152 | 2.28728512 | 0.829 | 0.466 | 1.08E-147 | CA2 |
|  | 6.71E-153 | 1.7601024  | 0.745 | 0.337 | 1.90E-148 | CA2 |
|  | 1.84E-154 | 1.7906704  | 0.842 | 0.529 | 5.22E-150 | CA2 |
|  | 2.28E-155 | 1.73759128 | 0.778 | 0.355 | 6.45E-151 | CA2 |
|  | 1.51E-157 | 2.05653168 | 0.788 | 0.399 | 4.28E-153 | CA2 |
|  | 7.31E-158 | 1.85047475 | 0.814 | 0.465 | 2.07E-153 | CA2 |
|  | 2.46E-158 | 1.74042375 | 0.838 | 0.463 | 6.95E-154 | CA2 |
|  | 1.55E-158 | 1.70664766 | 0.888 | 0.595 | 4.39E-154 | CA2 |
|  | 5.19E-159 | 1.91135952 | 0.758 | 0.361 | 1.47E-154 | CA2 |
|  | 1.42E-159 | 1.88116182 | 0.821 | 0.453 | 4.01E-155 | CA2 |
|  | 4.76E-160 | 1.85703814 | 0.769 | 0.342 | 1.35E-155 | CA2 |
|  | 2.40E-161 | 1.94880609 | 0.79  | 0.399 | 6.78E-157 | CA2 |
|  | 3.12E-162 | 1.7158143  | 0.888 | 0.566 | 8.83E-158 | CA2 |
|  | 2.65E-165 | 1.72953872 | 0.821 | 0.389 | 7.51E-161 | CA2 |
|  | 6.22E-169 | 1.83268094 | 0.86  | 0.515 | 1.76E-164 | CA2 |
|  | 1.61E-169 | 1.92934383 | 0.842 | 0.464 | 4.57E-165 | CA2 |
|  | 4.36E-171 | 1.93820366 | 0.784 | 0.366 | 1.23E-166 | CA2 |
|  | 1.28E-172 | 2.08319444 | 0.892 | 0.582 | 3.62E-168 | CA2 |
|  | 7.06E-175 | 1.83057733 | 0.901 | 0.607 | 2.00E-170 | CA2 |
|  | 2.83E-177 | 1.73302997 | 0.924 | 0.677 | 8.02E-173 | CA2 |
|  | 2.59E-177 | 1.89080911 | 0.901 | 0.59  | 7.33E-173 | CA2 |
|  | 4.61E-180 | 2.03709265 | 0.836 | 0.421 | 1.30E-175 | CA2 |
|  | 1.08E-180 | 2.00280955 | 0.778 | 0.337 | 3.05E-176 | CA2 |
|  | 8.97E-182 | 1.80880148 | 0.924 | 0.646 | 2.54E-177 | CA2 |
|  | 3.33E-182 | 1.99101118 | 0.847 | 0.436 | 9.42E-178 | CA2 |
|  | 3.08E-182 | 1.9483305  | 0.89  | 0.531 | 8.72E-178 | CA2 |
|  | 2.66E-182 | 2.12177865 | 0.821 | 0.388 | 7.54E-178 | CA2 |
|  | 3.36E-185 | 1.71444644 | 0.978 | 0.789 | 9.52E-181 | CA2 |
|  | 4.35E-186 | 1.75249948 | 0.914 | 0.491 | 1.23E-181 | CA2 |
|  | 1.54E-186 | 1.79942674 | 0.924 | 0.528 | 4.36E-182 | CA2 |
|  | 1.65E-187 | 1.84056754 | 0.933 | 0.664 | 4.66E-183 | CA2 |
|  | 1.61E-188 | 2.02890196 | 0.898 | 0.428 | 4.56E-184 | CA2 |
|  | 3.09E-190 | 1.71091168 | 0.961 | 0.814 | 8.76E-186 | CA2 |
|  | 5.33E-192 | 1.85069424 | 0.946 | 0.689 | 1.51E-187 | CA2 |
|  | 3.42E-192 | 2.02075702 | 0.875 | 0.475 | 9.67E-188 | CA2 |
|  | 3.37E-193 | 1.84707864 | 0.827 | 0.342 | 9.54E-189 | CA2 |
|  | 2.23E-193 | 2.33123801 | 0.86  | 0.473 | 6.30E-189 | CA2 |

|  |           |            |       |       |           |     |
|--|-----------|------------|-------|-------|-----------|-----|
|  | 9.06E-194 | 1.94700733 | 0.903 | 0.495 | 2.57E-189 | CA2 |
|  | 1.33E-194 | 2.05391755 | 0.935 | 0.663 | 3.77E-190 | CA2 |
|  | 4.44E-196 | 2.079097   | 0.898 | 0.534 | 1.26E-191 | CA2 |
|  | 4.12E-196 | 2.20534492 | 0.847 | 0.381 | 1.17E-191 | CA2 |
|  | 1.16E-196 | 1.88313024 | 0.959 | 0.692 | 3.28E-192 | CA2 |
|  | 1.41E-197 | 1.93525089 | 0.935 | 0.649 | 4.00E-193 | CA2 |
|  | 6.52E-200 | 2.02577965 | 0.896 | 0.47  | 1.84E-195 | CA2 |
|  | 1.94E-201 | 1.92698594 | 0.944 | 0.587 | 5.49E-197 | CA2 |
|  | 6.92E-204 | 2.07920913 | 0.879 | 0.445 | 1.96E-199 | CA2 |
|  | 3.51E-204 | 2.08809539 | 0.832 | 0.343 | 9.93E-200 | CA2 |
|  | 3.95E-206 | 2.11192846 | 0.937 | 0.568 | 1.12E-201 | CA2 |
|  | 9.91E-207 | 2.15549552 | 0.927 | 0.519 | 2.80E-202 | CA2 |
|  | 3.19E-207 | 2.20053923 | 0.942 | 0.518 | 9.04E-203 | CA2 |
|  | 1.80E-212 | 2.0175832  | 0.963 | 0.613 | 5.10E-208 | CA2 |
|  | 9.85E-220 | 2.00055273 | 0.916 | 0.42  | 2.79E-215 | CA2 |
|  | 3.20E-222 | 2.15624992 | 0.898 | 0.416 | 9.05E-218 | CA2 |
|  | 9.09E-225 | 2.29666032 | 0.933 | 0.522 | 2.57E-220 | CA2 |
|  | 2.43E-227 | 2.19121806 | 0.927 | 0.459 | 6.88E-223 | CA2 |
|  | 4.87E-228 | 2.27664942 | 0.909 | 0.436 | 1.38E-223 | CA2 |
|  | 8.63E-229 | 2.11791835 | 0.965 | 0.587 | 2.44E-224 | CA2 |
|  | 1.39E-229 | 2.12453103 | 0.976 | 0.664 | 3.92E-225 | CA2 |
|  | 2.81E-232 | 2.37507304 | 0.905 | 0.425 | 7.95E-228 | CA2 |
|  | 8.87E-236 | 2.34196783 | 0.89  | 0.369 | 2.51E-231 | CA2 |
|  | 1.98E-236 | 2.20469987 | 0.981 | 0.635 | 5.61E-232 | CA2 |
|  | 2.20E-237 | 2.20936817 | 0.972 | 0.627 | 6.23E-233 | CA2 |
|  | 3.81E-242 | 2.17448229 | 0.991 | 0.71  | 1.08E-237 | CA2 |
|  | 2.50E-244 | 2.4579765  | 0.985 | 0.732 | 7.07E-240 | CA2 |
|  | 8.25E-246 | 2.4403174  | 0.968 | 0.569 | 2.33E-241 | CA2 |
|  | 7.50E-246 | 2.40797609 | 0.927 | 0.446 | 2.12E-241 | CA2 |
|  | 2.65E-249 | 2.4795107  | 0.994 | 0.826 | 7.49E-245 | CA2 |
|  | 4.36E-251 | 2.32003852 | 0.929 | 0.425 | 1.23E-246 | CA2 |
|  | 1.22E-261 | 2.58748519 | 0.974 | 0.531 | 3.46E-257 | CA2 |
|  | 3.48E-262 | 2.61263716 | 0.944 | 0.42  | 9.85E-258 | CA2 |
|  | 2.74E-266 | 2.45340814 | 0.978 | 0.495 | 7.75E-262 | CA2 |
|  | 5.02E-273 | 2.32954869 | 0.713 | 0.172 | 1.42E-268 | CA2 |
|  | 4.22E-298 | 2.51445502 | 0.756 | 0.181 | 1.19E-293 | CA2 |
|  | 1.53E-10  | 1.11004991 | 0.564 | 0.687 | 4.33E-06  | CA3 |
|  | 4.23E-11  | 1.05533519 | 0.478 | 0.573 | 1.20E-06  | CA3 |
|  | 3.04E-13  | 0.94539937 | 0.58  | 0.6   | 8.60E-09  | CA3 |
|  | 5.04E-14  | 0.94885309 | 0.513 | 0.517 | 1.43E-09  | CA3 |
|  | 7.84E-15  | 0.99481867 | 0.552 | 0.53  | 2.22E-10  | CA3 |

|  |           |            |       |       |           |     |
|--|-----------|------------|-------|-------|-----------|-----|
|  | 6.09E-15  | 1.11052757 | 0.502 | 0.529 | 1.72E-10  | CA3 |
|  | 1.02E-15  | 1.18301274 | 0.684 | 0.794 | 2.89E-11  | CA3 |
|  | 2.84E-20  | 1.0846097  | 0.472 | 0.526 | 8.03E-16  | CA3 |
|  | 3.84E-23  | 0.92831639 | 0.564 | 0.577 | 1.09E-18  | CA3 |
|  | 2.65E-24  | 0.92120231 | 0.495 | 0.514 | 7.49E-20  | CA3 |
|  | 6.05E-25  | 1.0394662  | 0.514 | 0.482 | 1.71E-20  | CA3 |
|  | 4.30E-25  | 1.0109896  | 0.723 | 0.655 | 1.22E-20  | CA3 |
|  | 5.31E-28  | 1.07799357 | 0.542 | 0.594 | 1.50E-23  | CA3 |
|  | 2.58E-29  | 1.16544725 | 0.437 | 0.452 | 7.31E-25  | CA3 |
|  | 1.03E-30  | 1.01339182 | 0.614 | 0.558 | 2.91E-26  | CA3 |
|  | 2.45E-34  | 1.08463256 | 0.651 | 0.554 | 6.94E-30  | CA3 |
|  | 2.36E-34  | 1.01843002 | 0.555 | 0.523 | 6.67E-30  | CA3 |
|  | 2.67E-37  | 1.06237827 | 0.423 | 0.389 | 7.56E-33  | CA3 |
|  | 5.20E-38  | 1.27015861 | 0.591 | 0.581 | 1.47E-33  | CA3 |
|  | 1.85E-40  | 0.98203776 | 0.69  | 0.631 | 5.23E-36  | CA3 |
|  | 2.60E-45  | 1.08125488 | 0.6   | 0.569 | 7.37E-41  | CA3 |
|  | 3.52E-49  | 1.29630275 | 0.534 | 0.518 | 9.95E-45  | CA3 |
|  | 1.10E-51  | 1.25193505 | 0.623 | 0.598 | 3.11E-47  | CA3 |
|  | 2.33E-54  | 1.60660442 | 0.605 | 0.588 | 6.59E-50  | CA3 |
|  | 4.96E-56  | 1.02633714 | 0.546 | 0.498 | 1.40E-51  | CA3 |
|  | 1.98E-61  | 0.92112864 | 0.699 | 0.582 | 5.60E-57  | CA3 |
|  | 1.37E-63  | 1.19878961 | 0.556 | 0.488 | 3.88E-59  | CA3 |
|  | 1.89E-64  | 0.98430515 | 0.662 | 0.603 | 5.34E-60  | CA3 |
|  | 7.12E-65  | 1.13078596 | 0.574 | 0.495 | 2.02E-60  | CA3 |
|  | 8.67E-67  | 1.43034606 | 0.687 | 0.728 | 2.45E-62  | CA3 |
|  | 6.64E-67  | 1.05051456 | 0.809 | 0.833 | 1.88E-62  | CA3 |
|  | 3.46E-75  | 0.93434039 | 0.628 | 0.554 | 9.81E-71  | CA3 |
|  | 2.20E-75  | 1.18643858 | 0.6   | 0.497 | 6.22E-71  | CA3 |
|  | 3.75E-78  | 0.94202311 | 0.478 | 0.375 | 1.06E-73  | CA3 |
|  | 1.51E-78  | 0.93870434 | 0.458 | 0.346 | 4.29E-74  | CA3 |
|  | 1.45E-78  | 1.51938336 | 0.564 | 0.545 | 4.10E-74  | CA3 |
|  | 1.26E-78  | 0.96618972 | 0.454 | 0.346 | 3.58E-74  | CA3 |
|  | 1.12E-78  | 1.23858711 | 0.518 | 0.481 | 3.18E-74  | CA3 |
|  | 2.62E-79  | 1.02932626 | 0.743 | 0.599 | 7.40E-75  | CA3 |
|  | 1.27E-82  | 1.82537165 | 0.523 | 0.481 | 3.59E-78  | CA3 |
|  | 3.79E-86  | 0.9832872  | 0.69  | 0.572 | 1.07E-81  | CA3 |
|  | 1.01E-86  | 1.27076565 | 0.684 | 0.616 | 2.85E-82  | CA3 |
|  | 4.40E-87  | 1.16096988 | 0.565 | 0.504 | 1.25E-82  | CA3 |
|  | 1.83E-88  | 1.05412064 | 0.44  | 0.312 | 5.19E-84  | CA3 |
|  | 3.48E-99  | 1.27076457 | 0.571 | 0.48  | 9.86E-95  | CA3 |
|  | 2.57E-106 | 1.68128819 | 0.395 | 0.283 | 7.27E-102 | CA3 |

|  |           |            |       |       |           |     |
|--|-----------|------------|-------|-------|-----------|-----|
|  | 2.35E-109 | 1.31646356 | 0.532 | 0.479 | 6.65E-105 | CA3 |
|  | 2.14E-113 | 0.99745566 | 0.577 | 0.45  | 6.05E-109 | CA3 |
|  | 9.91E-121 | 1.24490613 | 0.562 | 0.464 | 2.80E-116 | CA3 |
|  | 9.06E-121 | 1.16673194 | 0.485 | 0.31  | 2.56E-116 | CA3 |
|  | 5.16E-123 | 1.05868277 | 0.694 | 0.607 | 1.46E-118 | CA3 |
|  | 1.82E-124 | 1.31382422 | 0.43  | 0.3   | 5.15E-120 | CA3 |
|  | 3.80E-127 | 0.9520485  | 0.71  | 0.62  | 1.07E-122 | CA3 |
|  | 3.58E-128 | 1.32671152 | 0.835 | 0.79  | 1.01E-123 | CA3 |
|  | 6.15E-130 | 1.11713473 | 0.684 | 0.541 | 1.74E-125 | CA3 |
|  | 1.58E-134 | 1.44371635 | 0.587 | 0.49  | 4.46E-130 | CA3 |
|  | 1.35E-134 | 1.71441586 | 0.615 | 0.536 | 3.82E-130 | CA3 |
|  | 2.01E-138 | 1.66799876 | 0.516 | 0.37  | 5.68E-134 | CA3 |
|  | 5.80E-141 | 1.07072844 | 0.937 | 0.789 | 1.64E-136 | CA3 |
|  | 1.27E-141 | 0.92457711 | 0.46  | 0.293 | 3.59E-137 | CA3 |
|  | 1.20E-143 | 1.28126857 | 0.524 | 0.349 | 3.40E-139 | CA3 |
|  | 2.69E-145 | 1.03510494 | 0.717 | 0.662 | 7.62E-141 | CA3 |
|  | 2.33E-145 | 1.16609642 | 0.748 | 0.572 | 6.60E-141 | CA3 |
|  | 6.18E-148 | 1.13424427 | 0.651 | 0.505 | 1.75E-143 | CA3 |
|  | 5.09E-148 | 0.9803418  | 0.491 | 0.32  | 1.44E-143 | CA3 |
|  | 4.41E-148 | 1.08471598 | 0.59  | 0.454 | 1.25E-143 | CA3 |
|  | 1.36E-148 | 1.03660029 | 0.495 | 0.322 | 3.85E-144 | CA3 |
|  | 1.03E-149 | 1.72814712 | 0.67  | 0.61  | 2.92E-145 | CA3 |
|  | 4.84E-156 | 1.15994591 | 0.647 | 0.517 | 1.37E-151 | CA3 |
|  | 2.30E-158 | 1.36810919 | 0.583 | 0.496 | 6.51E-154 | CA3 |
|  | 8.59E-169 | 1.01860928 | 0.553 | 0.398 | 2.43E-164 | CA3 |
|  | 6.95E-169 | 1.6092118  | 0.429 | 0.234 | 1.97E-164 | CA3 |
|  | 1.67E-170 | 1.0522195  | 0.328 | 0.144 | 4.74E-166 | CA3 |
|  | 1.99E-176 | 0.94138947 | 0.498 | 0.301 | 5.62E-172 | CA3 |
|  | 1.03E-201 | 0.96720727 | 0.348 | 0.141 | 2.90E-197 | CA3 |
|  | 2.20E-222 | 1.36447702 | 0.704 | 0.554 | 6.23E-218 | CA3 |
|  | 1.16E-223 | 1.50322708 | 0.71  | 0.594 | 3.29E-219 | CA3 |
|  | 1.97E-226 | 2.20687536 | 0.704 | 0.656 | 5.58E-222 | CA3 |
|  | 7.91E-231 | 1.03947844 | 0.848 | 0.694 | 2.24E-226 | CA3 |
|  | 2.26E-239 | 1.17263769 | 0.507 | 0.285 | 6.40E-235 | CA3 |
|  | 7.88E-255 | 2.22670246 | 0.559 | 0.392 | 2.23E-250 | CA3 |
|  | 9.89E-256 | 1.34976687 | 0.379 | 0.153 | 2.80E-251 | CA3 |
|  | 4.45E-256 | 2.15529908 | 0.662 | 0.489 | 1.26E-251 | CA3 |
|  | 1.45E-271 | 1.05546897 | 0.366 | 0.141 | 4.12E-267 | CA3 |
|  | 9.25E-290 | 1.30872896 | 0.67  | 0.511 | 2.62E-285 | CA3 |
|  | 4.51E-302 | 1.70331235 | 0.575 | 0.306 | 1.28E-297 | CA3 |
|  | 0         | 2.52023324 | 0.733 | 0.49  | 0         | CA3 |

|  |          |            |       |       |          |             |
|--|----------|------------|-------|-------|----------|-------------|
|  | 0        | 1.85465473 | 0.857 | 0.643 | 0        | CA3         |
|  | 0        | 1.56715237 | 0.848 | 0.628 | 0        | CA3         |
|  | 0        | 1.5348122  | 0.341 | 0.081 | 0        | CA3         |
|  | 0        | 1.4284421  | 0.429 | 0.112 | 0        | CA3         |
|  | 0        | 1.37078523 | 0.67  | 0.5   | 0        | CA3         |
|  | 0        | 1.24945949 | 0.732 | 0.526 | 0        | CA3         |
|  | 0        | 0.96532735 | 0.291 | 0.071 | 0        | CA3         |
|  | 0        | 0.92358809 | 0.236 | 0.036 | 0        | CA3         |
|  | 3.52E-26 | 2.45295304 | 0.629 | 0.384 | 9.98E-22 | Endothelial |
|  | 9.15E-27 | 2.19615739 | 0.657 | 0.418 | 2.59E-22 | Endothelial |
|  | 1.70E-29 | 2.31289032 | 0.807 | 0.599 | 4.82E-25 | Endothelial |
|  | 2.11E-31 | 2.18600994 | 0.336 | 0.083 | 5.98E-27 | Endothelial |
|  | 4.88E-39 | 2.30396179 | 0.621 | 0.236 | 1.38E-34 | Endothelial |
|  | 1.01E-39 | 2.37263435 | 0.65  | 0.289 | 2.86E-35 | Endothelial |
|  | 6.67E-40 | 2.46989503 | 0.807 | 0.575 | 1.89E-35 | Endothelial |
|  | 3.57E-40 | 2.15028715 | 0.814 | 0.523 | 1.01E-35 | Endothelial |
|  | 1.97E-41 | 2.26227145 | 0.571 | 0.199 | 5.57E-37 | Endothelial |
|  | 1.69E-43 | 2.25780094 | 0.779 | 0.384 | 4.78E-39 | Endothelial |
|  | 1.28E-43 | 2.23884029 | 0.814 | 0.518 | 3.62E-39 | Endothelial |
|  | 6.42E-44 | 2.96316967 | 0.8   | 0.515 | 1.82E-39 | Endothelial |
|  | 7.84E-45 | 2.29929756 | 0.864 | 0.723 | 2.22E-40 | Endothelial |
|  | 6.99E-45 | 2.31475133 | 0.864 | 0.689 | 1.98E-40 | Endothelial |
|  | 5.88E-45 | 2.5845105  | 0.807 | 0.519 | 1.66E-40 | Endothelial |
|  | 2.27E-45 | 2.13624482 | 0.814 | 0.498 | 6.41E-41 | Endothelial |
|  | 5.77E-48 | 2.33828092 | 0.857 | 0.677 | 1.63E-43 | Endothelial |
|  | 8.99E-51 | 2.95304483 | 0.721 | 0.325 | 2.54E-46 | Endothelial |
|  | 4.84E-51 | 2.89833627 | 0.836 | 0.51  | 1.37E-46 | Endothelial |
|  | 1.84E-51 | 2.64332532 | 0.879 | 0.66  | 5.21E-47 | Endothelial |
|  | 1.03E-54 | 2.48154027 | 0.857 | 0.548 | 2.92E-50 | Endothelial |
|  | 1.64E-55 | 2.33629738 | 0.807 | 0.348 | 4.64E-51 | Endothelial |
|  | 1.85E-56 | 2.27605997 | 0.914 | 0.511 | 5.23E-52 | Endothelial |
|  | 4.38E-61 | 2.30357841 | 0.693 | 0.23  | 1.24E-56 | Endothelial |
|  | 5.48E-62 | 2.68035317 | 0.914 | 0.617 | 1.55E-57 | Endothelial |
|  | 5.96E-63 | 2.71809478 | 0.836 | 0.414 | 1.69E-58 | Endothelial |
|  | 1.52E-65 | 2.19376172 | 0.557 | 0.128 | 4.29E-61 | Endothelial |
|  | 9.26E-67 | 2.41170723 | 0.943 | 0.683 | 2.62E-62 | Endothelial |
|  | 7.37E-67 | 3.02642335 | 0.829 | 0.374 | 2.09E-62 | Endothelial |
|  | 9.95E-68 | 2.20795636 | 0.729 | 0.24  | 2.82E-63 | Endothelial |
|  | 2.52E-68 | 2.13676499 | 0.664 | 0.18  | 7.14E-64 | Endothelial |
|  | 1.07E-69 | 2.32440661 | 0.607 | 0.137 | 3.04E-65 | Endothelial |
|  | 7.35E-75 | 2.18221686 | 0.886 | 0.332 | 2.08E-70 | Endothelial |



|  |           |            |       |       |           |             |
|--|-----------|------------|-------|-------|-----------|-------------|
|  | 1.23E-77  | 2.99261735 | 0.779 | 0.25  | 3.49E-73  | Endothelial |
|  | 1.65E-78  | 2.83361615 | 0.786 | 0.27  | 4.67E-74  | Endothelial |
|  | 1.54E-80  | 2.22725677 | 0.75  | 0.208 | 4.35E-76  | Endothelial |
|  | 7.34E-81  | 2.41703708 | 0.643 | 0.148 | 2.08E-76  | Endothelial |
|  | 1.13E-102 | 2.22908982 | 0.714 | 0.144 | 3.21E-98  | Endothelial |
|  | 2.05E-103 | 2.35136802 | 0.521 | 0.069 | 5.80E-99  | Endothelial |
|  | 1.13E-103 | 4.01517174 | 0.836 | 0.232 | 3.20E-99  | Endothelial |
|  | 4.70E-110 | 2.91018006 | 0.757 | 0.162 | 1.33E-105 | Endothelial |
|  | 1.58E-113 | 2.45683396 | 0.714 | 0.128 | 4.46E-109 | Endothelial |
|  | 6.16E-116 | 2.20327149 | 0.636 | 0.099 | 1.74E-111 | Endothelial |
|  | 7.06E-122 | 3.02676449 | 0.871 | 0.203 | 2.00E-117 | Endothelial |
|  | 4.24E-122 | 2.32498281 | 0.771 | 0.151 | 1.20E-117 | Endothelial |
|  | 2.66E-124 | 4.08181527 | 0.864 | 0.207 | 7.54E-120 | Endothelial |
|  | 1.69E-125 | 2.13371016 | 0.671 | 0.105 | 4.78E-121 | Endothelial |
|  | 4.82E-127 | 2.17344529 | 0.671 | 0.102 | 1.36E-122 | Endothelial |
|  | 5.80E-131 | 2.29466081 | 0.793 | 0.14  | 1.64E-126 | Endothelial |
|  | 1.50E-138 | 3.11062723 | 0.779 | 0.133 | 4.24E-134 | Endothelial |
|  | 7.54E-139 | 2.40994943 | 0.643 | 0.084 | 2.13E-134 | Endothelial |
|  | 3.78E-148 | 2.51556511 | 0.679 | 0.091 | 1.07E-143 | Endothelial |
|  | 9.71E-154 | 3.19170354 | 0.786 | 0.123 | 2.75E-149 | Endothelial |
|  | 3.22E-155 | 2.82221598 | 0.836 | 0.142 | 9.10E-151 | Endothelial |
|  | 5.79E-156 | 2.37124078 | 0.679 | 0.086 | 1.64E-151 | Endothelial |
|  | 1.57E-157 | 2.81708697 | 0.857 | 0.151 | 4.45E-153 | Endothelial |
|  | 5.74E-161 | 2.58301586 | 0.693 | 0.085 | 1.63E-156 | Endothelial |
|  | 4.61E-166 | 2.52317808 | 0.75  | 0.102 | 1.30E-161 | Endothelial |
|  | 6.43E-168 | 4.85233846 | 0.879 | 0.153 | 1.82E-163 | Endothelial |
|  | 2.50E-181 | 2.73435652 | 0.514 | 0.04  | 7.07E-177 | Endothelial |
|  | 5.57E-183 | 2.23604875 | 0.429 | 0.026 | 1.58E-178 | Endothelial |
|  | 6.26E-191 | 3.15533223 | 0.821 | 0.111 | 1.77E-186 | Endothelial |
|  | 2.20E-208 | 2.1933758  | 0.743 | 0.075 | 6.22E-204 | Endothelial |
|  | 1.78E-209 | 4.35575754 | 0.886 | 0.12  | 5.03E-205 | Endothelial |
|  | 8.93E-216 | 2.66870176 | 0.671 | 0.06  | 2.53E-211 | Endothelial |
|  | 2.98E-230 | 2.47539966 | 0.707 | 0.059 | 8.44E-226 | Endothelial |
|  | 4.09E-248 | 3.32402223 | 0.779 | 0.071 | 1.16E-243 | Endothelial |
|  | 3.71E-249 | 2.87831928 | 0.707 | 0.056 | 1.05E-244 | Endothelial |
|  | 1.28E-249 | 3.07186063 | 0.8   | 0.074 | 3.61E-245 | Endothelial |
|  | 1.22E-251 | 2.17247835 | 0.686 | 0.05  | 3.45E-247 | Endothelial |
|  | 9.54E-284 | 3.27296729 | 0.736 | 0.054 | 2.70E-279 | Endothelial |
|  | 9.21E-294 | 2.14459972 | 0.65  | 0.039 | 2.61E-289 | Endothelial |
|  | 1.50E-297 | 3.99508557 | 0.857 | 0.073 | 4.24E-293 | Endothelial |
|  | 4.37E-300 | 3.0423457  | 0.836 | 0.066 | 1.24E-295 | Endothelial |

|  |           |            |       |       |            |             |
|--|-----------|------------|-------|-------|------------|-------------|
|  | 1.54E-301 | 2.88146972 | 0.757 | 0.054 | 4.35E-297  | Endothelial |
|  | 1.01E-302 | 3.97583201 | 0.8   | 0.062 | 2.87E-298  | Endothelial |
|  | 0         | 5.58463369 | 0.936 | 0.015 | 0          | Endothelial |
|  | 0         | 4.66047592 | 0.85  | 0.056 | 0          | Endothelial |
|  | 0         | 4.24790204 | 0.907 | 0.007 | 0          | Endothelial |
|  | 0         | 4.23843186 | 0.886 | 0.025 | 0          | Endothelial |
|  | 0         | 4.09468397 | 0.893 | 0.044 | 0          | Endothelial |
|  | 0         | 3.50122674 | 0.721 | 0.029 | 0          | Endothelial |
|  | 0         | 3.25522368 | 0.779 | 0.052 | 0          | Endothelial |
|  | 0         | 3.13410437 | 0.843 | 0.016 | 0          | Endothelial |
|  | 0         | 2.88885776 | 0.8   | 0.027 | 0          | Endothelial |
|  | 0         | 2.86696918 | 0.643 | 0.028 | 0          | Endothelial |
|  | 0         | 2.86281071 | 0.779 | 0.009 | 0          | Endothelial |
|  | 0         | 2.79568504 | 0.629 | 0.018 | 0          | Endothelial |
|  | 0         | 2.78340438 | 0.679 | 0.004 | 0          | Endothelial |
|  | 0         | 2.75681879 | 0.757 | 0.01  | 0          | Endothelial |
|  | 0         | 2.71033019 | 0.814 | 0.05  | 0          | Endothelial |
|  | 0         | 2.70991262 | 0.779 | 0.004 | 0          | Endothelial |
|  | 0         | 2.67934437 | 0.743 | 0.005 | 0          | Endothelial |
|  | 0         | 2.61465453 | 0.729 | 0.036 | 0          | Endothelial |
|  | 0         | 2.54814568 | 0.664 | 0.028 | 0          | Endothelial |
|  | 0         | 2.47406554 | 0.55  | 0.006 | 0          | Endothelial |
|  | 0         | 2.45589066 | 0.579 | 0.014 | 0          | Endothelial |
|  | 0         | 2.36523122 | 0.593 | 0.003 | 0          | Endothelial |
|  | 0         | 2.35147318 | 0.686 | 0.022 | 0          | Endothelial |
|  | 0         | 2.26743881 | 0.586 | 0.017 | 0          | Endothelial |
|  | 1.08E-07  | 2.19478768 | 0.35  | 0.069 | 0.00305172 | Ependymal   |
|  | 4.83E-08  | 2.72644748 | 0.8   | 0.507 | 0.0013678  | Ependymal   |
|  | 1.60E-09  | 2.59442516 | 0.85  | 0.481 | 4.53E-05   | Ependymal   |
|  | 1.01E-10  | 2.24910154 | 0.9   | 0.505 | 2.87E-06   | Ependymal   |
|  | 7.06E-11  | 2.72805571 | 0.95  | 0.525 | 2.00E-06   | Ependymal   |
|  | 2.71E-11  | 2.28246708 | 0.9   | 0.447 | 7.68E-07   | Ependymal   |
|  | 2.34E-11  | 2.65024758 | 0.8   | 0.317 | 6.62E-07   | Ependymal   |
|  | 4.49E-12  | 2.17536275 | 0.95  | 0.475 | 1.27E-07   | Ependymal   |
|  | 3.93E-12  | 2.22943491 | 0.8   | 0.286 | 1.11E-07   | Ependymal   |
|  | 3.62E-12  | 2.97214803 | 0.9   | 0.443 | 1.02E-07   | Ependymal   |
|  | 2.32E-12  | 2.41797495 | 0.95  | 0.488 | 6.55E-08   | Ependymal   |
|  | 1.06E-12  | 2.26704699 | 0.95  | 0.461 | 3.01E-08   | Ependymal   |
|  | 4.57E-13  | 3.10271771 | 0.95  | 0.575 | 1.29E-08   | Ependymal   |
|  | 7.42E-14  | 3.00619147 | 0.9   | 0.37  | 2.10E-09   | Ependymal   |
|  | 2.55E-14  | 2.80808565 | 0.95  | 0.457 | 7.21E-10   | Ependymal   |

|  |          |            |      |       |          |           |
|--|----------|------------|------|-------|----------|-----------|
|  | 1.58E-14 | 2.29683044 | 0.85 | 0.28  | 4.48E-10 | Ependymal |
|  | 9.03E-15 | 2.3258129  | 1    | 0.461 | 2.56E-10 | Ependymal |
|  | 6.68E-15 | 3.53413384 | 0.9  | 0.347 | 1.89E-10 | Ependymal |
|  | 5.20E-15 | 2.12751259 | 0.8  | 0.227 | 1.47E-10 | Ependymal |
|  | 3.95E-15 | 3.18662206 | 0.9  | 0.34  | 1.12E-10 | Ependymal |
|  | 3.03E-15 | 2.45569424 | 1    | 0.42  | 8.59E-11 | Ependymal |
|  | 1.69E-15 | 2.4984021  | 0.9  | 0.304 | 4.78E-11 | Ependymal |
|  | 8.47E-16 | 2.88550201 | 0.9  | 0.312 | 2.40E-11 | Ependymal |
|  | 7.57E-16 | 4.08774994 | 0.95 | 0.345 | 2.14E-11 | Ependymal |
|  | 1.72E-16 | 2.36035526 | 0.75 | 0.167 | 4.87E-12 | Ependymal |
|  | 1.71E-16 | 2.90855284 | 0.8  | 0.207 | 4.84E-12 | Ependymal |
|  | 1.46E-16 | 2.94410084 | 0.95 | 0.343 | 4.12E-12 | Ependymal |
|  | 5.98E-17 | 2.33473169 | 0.8  | 0.198 | 1.69E-12 | Ependymal |
|  | 4.23E-17 | 2.64804754 | 0.7  | 0.133 | 1.20E-12 | Ependymal |
|  | 3.86E-17 | 2.38414337 | 0.95 | 0.279 | 1.09E-12 | Ependymal |
|  | 7.46E-18 | 2.75440881 | 1    | 0.355 | 2.11E-13 | Ependymal |
|  | 2.78E-18 | 2.84238684 | 0.95 | 0.301 | 7.86E-14 | Ependymal |
|  | 9.65E-19 | 2.55532611 | 0.95 | 0.279 | 2.73E-14 | Ependymal |
|  | 8.04E-19 | 2.48952568 | 0.75 | 0.148 | 2.28E-14 | Ependymal |
|  | 7.11E-20 | 3.65633195 | 0.85 | 0.195 | 2.01E-15 | Ependymal |
|  | 2.04E-20 | 3.34872663 | 0.8  | 0.16  | 5.79E-16 | Ependymal |
|  | 2.03E-20 | 2.27267513 | 0.75 | 0.132 | 5.75E-16 | Ependymal |
|  | 2.01E-20 | 2.72765896 | 0.95 | 0.258 | 5.69E-16 | Ependymal |
|  | 1.14E-20 | 2.37509027 | 0.9  | 0.212 | 3.23E-16 | Ependymal |
|  | 3.81E-21 | 2.63809423 | 1    | 0.241 | 1.08E-16 | Ependymal |
|  | 4.54E-22 | 4.42370983 | 1    | 0.28  | 1.29E-17 | Ependymal |
|  | 3.02E-22 | 3.14161007 | 0.8  | 0.145 | 8.54E-18 | Ependymal |
|  | 2.28E-22 | 2.29852037 | 0.85 | 0.165 | 6.45E-18 | Ependymal |
|  | 1.83E-22 | 2.25200693 | 0.9  | 0.195 | 5.18E-18 | Ependymal |
|  | 5.83E-23 | 3.33132076 | 0.95 | 0.218 | 1.65E-18 | Ependymal |
|  | 1.29E-23 | 2.87494328 | 0.85 | 0.152 | 3.66E-19 | Ependymal |
|  | 6.06E-24 | 2.20838456 | 0.8  | 0.132 | 1.71E-19 | Ependymal |
|  | 3.40E-24 | 2.58885639 | 0.85 | 0.151 | 9.64E-20 | Ependymal |
|  | 1.17E-24 | 4.12637918 | 0.95 | 0.203 | 3.32E-20 | Ependymal |
|  | 5.15E-25 | 2.52685016 | 0.8  | 0.125 | 1.46E-20 | Ependymal |
|  | 4.74E-26 | 2.75667997 | 0.9  | 0.16  | 1.34E-21 | Ependymal |
|  | 1.03E-27 | 4.00845307 | 0.8  | 0.111 | 2.91E-23 | Ependymal |
|  | 1.20E-29 | 2.67837486 | 0.9  | 0.132 | 3.38E-25 | Ependymal |
|  | 5.56E-30 | 4.81962707 | 0.85 | 0.118 | 1.57E-25 | Ependymal |
|  | 1.37E-30 | 3.19805798 | 0.9  | 0.135 | 3.89E-26 | Ependymal |
|  | 1.66E-33 | 2.25040021 | 0.9  | 0.116 | 4.70E-29 | Ependymal |

|  |           |            |      |       |           |           |
|--|-----------|------------|------|-------|-----------|-----------|
|  | 7.31E-34  | 2.4330631  | 1    | 0.14  | 2.07E-29  | Ependymal |
|  | 1.48E-35  | 3.02355263 | 0.9  | 0.108 | 4.20E-31  | Ependymal |
|  | 7.85E-36  | 3.32674084 | 1    | 0.136 | 2.22E-31  | Ependymal |
|  | 5.86E-36  | 2.29634    | 0.75 | 0.073 | 1.66E-31  | Ependymal |
|  | 8.04E-37  | 2.48435963 | 0.75 | 0.069 | 2.27E-32  | Ependymal |
|  | 2.67E-37  | 2.24528694 | 0.85 | 0.091 | 7.57E-33  | Ependymal |
|  | 1.45E-37  | 2.6579743  | 0.9  | 0.105 | 4.09E-33  | Ependymal |
|  | 6.23E-38  | 2.60739902 | 0.9  | 0.104 | 1.76E-33  | Ependymal |
|  | 9.10E-39  | 2.68899298 | 0.95 | 0.11  | 2.58E-34  | Ependymal |
|  | 2.43E-39  | 3.13862651 | 0.95 | 0.109 | 6.88E-35  | Ependymal |
|  | 1.90E-39  | 2.2856237  | 0.8  | 0.075 | 5.37E-35  | Ependymal |
|  | 5.75E-40  | 2.98921131 | 0.9  | 0.099 | 1.63E-35  | Ependymal |
|  | 5.24E-40  | 2.18603518 | 1    | 0.109 | 1.48E-35  | Ependymal |
|  | 1.15E-43  | 2.91248342 | 0.95 | 0.101 | 3.27E-39  | Ependymal |
|  | 1.38E-44  | 3.41151388 | 0.9  | 0.086 | 3.90E-40  | Ependymal |
|  | 5.50E-45  | 2.19970359 | 0.8  | 0.064 | 1.56E-40  | Ependymal |
|  | 6.70E-46  | 2.48616518 | 0.85 | 0.074 | 1.90E-41  | Ependymal |
|  | 3.24E-46  | 2.82505443 | 0.95 | 0.093 | 9.16E-42  | Ependymal |
|  | 2.48E-50  | 3.27056358 | 0.95 | 0.082 | 7.01E-46  | Ependymal |
|  | 7.71E-53  | 2.24493274 | 0.9  | 0.068 | 2.18E-48  | Ependymal |
|  | 2.52E-54  | 3.84695431 | 0.85 | 0.061 | 7.13E-50  | Ependymal |
|  | 7.09E-56  | 3.69119847 | 0.95 | 0.076 | 2.01E-51  | Ependymal |
|  | 1.13E-58  | 2.90651345 | 0.9  | 0.062 | 3.20E-54  | Ependymal |
|  | 1.10E-59  | 3.50084167 | 0.8  | 0.048 | 3.11E-55  | Ependymal |
|  | 7.84E-60  | 2.79552797 | 0.8  | 0.048 | 2.22E-55  | Ependymal |
|  | 7.77E-62  | 2.81166147 | 0.75 | 0.041 | 2.20E-57  | Ependymal |
|  | 3.21E-69  | 2.38600478 | 0.75 | 0.036 | 9.10E-65  | Ependymal |
|  | 1.58E-74  | 2.26433483 | 0.5  | 0.014 | 4.48E-70  | Ependymal |
|  | 6.10E-75  | 2.55940441 | 0.8  | 0.038 | 1.73E-70  | Ependymal |
|  | 6.80E-85  | 3.69584395 | 0.9  | 0.043 | 1.93E-80  | Ependymal |
|  | 2.19E-87  | 2.96128439 | 0.85 | 0.037 | 6.21E-83  | Ependymal |
|  | 5.46E-92  | 2.42317601 | 0.65 | 0.02  | 1.54E-87  | Ependymal |
|  | 7.69E-96  | 2.57015323 | 0.75 | 0.026 | 2.18E-91  | Ependymal |
|  | 7.47E-105 | 4.048708   | 0.85 | 0.03  | 2.12E-100 | Ependymal |
|  | 1.74E-123 | 2.4605304  | 0.85 | 0.025 | 4.93E-119 | Ependymal |
|  | 1.32E-128 | 2.17669216 | 0.8  | 0.021 | 3.73E-124 | Ependymal |
|  | 2.64E-155 | 2.3899992  | 0.85 | 0.02  | 7.48E-151 | Ependymal |
|  | 1.48E-158 | 2.63145135 | 0.7  | 0.013 | 4.20E-154 | Ependymal |
|  | 1.53E-160 | 2.29888419 | 0.85 | 0.019 | 4.33E-156 | Ependymal |
|  | 5.80E-184 | 2.37067269 | 0.75 | 0.013 | 1.64E-179 | Ependymal |
|  | 8.18E-203 | 3.11756111 | 0.8  | 0.013 | 2.31E-198 | Ependymal |

|  |           |            |       |       |           |           |
|--|-----------|------------|-------|-------|-----------|-----------|
|  | 0         | 3.44890071 | 0.8   | 0.007 | 0         | Ependymal |
|  | 0         | 2.21604798 | 0.85  | 0.008 | 0         | Ependymal |
|  | 0         | 1.29871899 | 0.65  | 0.004 | 0         | Ependymal |
|  | 8.44E-56  | 1.18491395 | 0.36  | 0.225 | 2.39E-51  | GABAergic |
|  | 6.16E-97  | 1.18755255 | 0.409 | 0.216 | 1.74E-92  | GABAergic |
|  | 8.59E-135 | 1.18399788 | 0.51  | 0.25  | 2.43E-130 | GABAergic |
|  | 9.90E-139 | 1.30195412 | 0.439 | 0.205 | 2.80E-134 | GABAergic |
|  | 4.53E-161 | 1.45819001 | 0.801 | 0.686 | 1.28E-156 | GABAergic |
|  | 1.63E-179 | 1.14833963 | 0.367 | 0.132 | 4.62E-175 | GABAergic |
|  | 4.29E-180 | 1.21131239 | 0.748 | 0.464 | 1.21E-175 | GABAergic |
|  | 7.30E-200 | 1.3301974  | 0.671 | 0.367 | 2.07E-195 | GABAergic |
|  | 7.43E-207 | 1.21884341 | 0.851 | 0.523 | 2.10E-202 | GABAergic |
|  | 6.28E-220 | 1.45282809 | 0.499 | 0.199 | 1.78E-215 | GABAergic |
|  | 7.63E-224 | 1.13106617 | 0.683 | 0.347 | 2.16E-219 | GABAergic |
|  | 2.24E-227 | 1.16711657 | 0.734 | 0.411 | 6.34E-223 | GABAergic |
|  | 3.43E-234 | 1.38920911 | 0.887 | 0.629 | 9.72E-230 | GABAergic |
|  | 7.48E-246 | 2.34035066 | 0.388 | 0.119 | 2.12E-241 | GABAergic |
|  | 7.77E-263 | 1.34418334 | 0.732 | 0.394 | 2.20E-258 | GABAergic |
|  | 7.21E-275 | 3.2406199  | 0.668 | 0.426 | 2.04E-270 | GABAergic |
|  | 1.43E-277 | 1.8794938  | 0.694 | 0.376 | 4.06E-273 | GABAergic |
|  | 2.00E-286 | 1.50385822 | 0.859 | 0.493 | 5.67E-282 | GABAergic |
|  | 8.69E-288 | 1.7036519  | 0.639 | 0.251 | 2.46E-283 | GABAergic |
|  | 2.17E-288 | 1.17156253 | 0.217 | 0.031 | 6.14E-284 | GABAergic |
|  | 8.60E-292 | 1.16214695 | 0.931 | 0.636 | 2.44E-287 | GABAergic |
|  | 7.17E-296 | 1.38594266 | 0.553 | 0.209 | 2.03E-291 | GABAergic |
|  | 1.17E-301 | 1.69971729 | 0.674 | 0.314 | 3.31E-297 | GABAergic |
|  | 0         | 3.47759295 | 0.897 | 0.195 | 0         | GABAergic |
|  | 0         | 3.22055967 | 0.942 | 0.451 | 0         | GABAergic |
|  | 0         | 3.15875572 | 0.789 | 0.164 | 0         | GABAergic |
|  | 0         | 3.03703308 | 0.747 | 0.182 | 0         | GABAergic |
|  | 0         | 2.95951561 | 0.678 | 0.079 | 0         | GABAergic |
|  | 0         | 2.89872585 | 0.737 | 0.103 | 0         | GABAergic |
|  | 0         | 2.80252941 | 0.922 | 0.516 | 0         | GABAergic |
|  | 0         | 2.55148699 | 0.851 | 0.032 | 0         | GABAergic |
|  | 0         | 2.43751694 | 0.602 | 0.166 | 0         | GABAergic |
|  | 0         | 2.34808706 | 0.926 | 0.384 | 0         | GABAergic |
|  | 0         | 2.31280555 | 0.873 | 0.442 | 0         | GABAergic |
|  | 0         | 2.28166914 | 0.8   | 0.013 | 0         | GABAergic |
|  | 0         | 2.21759323 | 0.699 | 0.362 | 0         | GABAergic |
|  | 0         | 2.17205308 | 0.655 | 0.231 | 0         | GABAergic |
|  | 0         | 2.16214122 | 0.85  | 0.167 | 0         | GABAergic |

|  |   |            |       |       |   |           |
|--|---|------------|-------|-------|---|-----------|
|  | 0 | 2.07717672 | 0.913 | 0.31  | 0 | GABAergic |
|  | 0 | 1.99342614 | 0.946 | 0.714 | 0 | GABAergic |
|  | 0 | 1.9906398  | 0.977 | 0.781 | 0 | GABAergic |
|  | 0 | 1.95972577 | 0.852 | 0.413 | 0 | GABAergic |
|  | 0 | 1.87516792 | 0.839 | 0.339 | 0 | GABAergic |
|  | 0 | 1.86682605 | 0.927 | 0.431 | 0 | GABAergic |
|  | 0 | 1.83856149 | 0.356 | 0.034 | 0 | GABAergic |
|  | 0 | 1.83833896 | 0.685 | 0.168 | 0 | GABAergic |
|  | 0 | 1.7724103  | 0.836 | 0.312 | 0 | GABAergic |
|  | 0 | 1.74973912 | 0.647 | 0.073 | 0 | GABAergic |
|  | 0 | 1.73429236 | 0.942 | 0.606 | 0 | GABAergic |
|  | 0 | 1.73068033 | 0.869 | 0.301 | 0 | GABAergic |
|  | 0 | 1.72442209 | 0.356 | 0.058 | 0 | GABAergic |
|  | 0 | 1.71525532 | 0.778 | 0.157 | 0 | GABAergic |
|  | 0 | 1.69706266 | 0.848 | 0.216 | 0 | GABAergic |
|  | 0 | 1.6948924  | 0.711 | 0.335 | 0 | GABAergic |
|  | 0 | 1.6875739  | 0.855 | 0.491 | 0 | GABAergic |
|  | 0 | 1.68163402 | 0.781 | 0.089 | 0 | GABAergic |
|  | 0 | 1.68047433 | 0.898 | 0.548 | 0 | GABAergic |
|  | 0 | 1.6792732  | 0.578 | 0.151 | 0 | GABAergic |
|  | 0 | 1.67832982 | 0.913 | 0.435 | 0 | GABAergic |
|  | 0 | 1.6709591  | 0.806 | 0.189 | 0 | GABAergic |
|  | 0 | 1.66712016 | 0.627 | 0.29  | 0 | GABAergic |
|  | 0 | 1.66680601 | 0.731 | 0.338 | 0 | GABAergic |
|  | 0 | 1.63537475 | 0.706 | 0.038 | 0 | GABAergic |
|  | 0 | 1.576497   | 0.966 | 0.632 | 0 | GABAergic |
|  | 0 | 1.54036249 | 0.784 | 0.278 | 0 | GABAergic |
|  | 0 | 1.52264438 | 0.705 | 0.207 | 0 | GABAergic |
|  | 0 | 1.52127665 | 0.736 | 0.185 | 0 | GABAergic |
|  | 0 | 1.51293744 | 0.837 | 0.177 | 0 | GABAergic |
|  | 0 | 1.45095057 | 0.732 | 0.133 | 0 | GABAergic |
|  | 0 | 1.44913952 | 0.273 | 0.021 | 0 | GABAergic |
|  | 0 | 1.44355738 | 0.808 | 0.215 | 0 | GABAergic |
|  | 0 | 1.4369056  | 0.954 | 0.554 | 0 | GABAergic |
|  | 0 | 1.42280517 | 0.566 | 0.134 | 0 | GABAergic |
|  | 0 | 1.41977851 | 0.671 | 0.224 | 0 | GABAergic |
|  | 0 | 1.39756663 | 0.892 | 0.539 | 0 | GABAergic |
|  | 0 | 1.38976757 | 0.453 | 0.126 | 0 | GABAergic |
|  | 0 | 1.38893371 | 0.636 | 0.224 | 0 | GABAergic |
|  | 0 | 1.37740616 | 0.925 | 0.508 | 0 | GABAergic |
|  | 0 | 1.37625859 | 0.904 | 0.496 | 0 | GABAergic |

|  |   |            |       |       |   |              |
|--|---|------------|-------|-------|---|--------------|
|  | 0 | 1.37588124 | 0.88  | 0.462 | 0 | GABAergic    |
|  | 0 | 1.37249709 | 0.724 | 0.145 | 0 | GABAergic    |
|  | 0 | 1.34331503 | 0.936 | 0.473 | 0 | GABAergic    |
|  | 0 | 1.33410599 | 0.855 | 0.496 | 0 | GABAergic    |
|  | 0 | 1.32846551 | 0.728 | 0.04  | 0 | GABAergic    |
|  | 0 | 1.31018044 | 0.929 | 0.677 | 0 | GABAergic    |
|  | 0 | 1.30939256 | 0.872 | 0.388 | 0 | GABAergic    |
|  | 0 | 1.3015819  | 0.986 | 0.818 | 0 | GABAergic    |
|  | 0 | 1.29139078 | 0.793 | 0.28  | 0 | GABAergic    |
|  | 0 | 1.28978892 | 0.494 | 0.15  | 0 | GABAergic    |
|  | 0 | 1.27372525 | 0.693 | 0.065 | 0 | GABAergic    |
|  | 0 | 1.27013648 | 0.93  | 0.52  | 0 | GABAergic    |
|  | 0 | 1.26199377 | 0.715 | 0.313 | 0 | GABAergic    |
|  | 0 | 1.25041147 | 0.872 | 0.479 | 0 | GABAergic    |
|  | 0 | 1.24335075 | 0.598 | 0.179 | 0 | GABAergic    |
|  | 0 | 1.21567097 | 0.793 | 0.216 | 0 | GABAergic    |
|  | 0 | 1.20833158 | 0.811 | 0.388 | 0 | GABAergic    |
|  | 0 | 1.20630852 | 0.739 | 0.139 | 0 | GABAergic    |
|  | 0 | 1.18234871 | 0.472 | 0.111 | 0 | GABAergic    |
|  | 0 | 1.11543401 | 0.784 | 0.295 | 0 | GABAergic    |
|  | 0 | 1.11227585 | 0.808 | 0.361 | 0 | GABAergic    |
|  | 0 | 2.51208552 | 0.979 | 0.747 | 0 | Granule cell |
|  | 0 | 2.50511169 | 0.931 | 0.273 | 0 | Granule cell |
|  | 0 | 2.34767951 | 0.784 | 0.164 | 0 | Granule cell |
|  | 0 | 2.33610614 | 0.943 | 0.29  | 0 | Granule cell |
|  | 0 | 2.33145739 | 0.947 | 0.394 | 0 | Granule cell |
|  | 0 | 2.30727012 | 0.981 | 0.427 | 0 | Granule cell |
|  | 0 | 2.27527343 | 0.924 | 0.199 | 0 | Granule cell |
|  | 0 | 2.22223251 | 0.985 | 0.756 | 0 | Granule cell |
|  | 0 | 2.18978044 | 0.899 | 0.27  | 0 | Granule cell |
|  | 0 | 2.16237108 | 0.958 | 0.29  | 0 | Granule cell |
|  | 0 | 2.13970913 | 0.978 | 0.343 | 0 | Granule cell |
|  | 0 | 2.13008187 | 0.992 | 0.579 | 0 | Granule cell |
|  | 0 | 2.07617326 | 0.982 | 0.39  | 0 | Granule cell |
|  | 0 | 2.03929069 | 0.978 | 0.472 | 0 | Granule cell |
|  | 0 | 2.03795199 | 0.948 | 0.329 | 0 | Granule cell |
|  | 0 | 2.02004813 | 0.87  | 0.19  | 0 | Granule cell |
|  | 0 | 2.0038608  | 0.9   | 0.141 | 0 | Granule cell |
|  | 0 | 1.99519612 | 0.869 | 0.115 | 0 | Granule cell |
|  | 0 | 1.95392975 | 0.983 | 0.543 | 0 | Granule cell |
|  | 0 | 1.95074945 | 0.992 | 0.505 | 0 | Granule cell |

|  |   |            |       |       |   |              |
|--|---|------------|-------|-------|---|--------------|
|  | 0 | 1.9160295  | 0.913 | 0.239 | 0 | Granule cell |
|  | 0 | 1.9130874  | 0.957 | 0.353 | 0 | Granule cell |
|  | 0 | 1.89203218 | 0.964 | 0.601 | 0 | Granule cell |
|  | 0 | 1.89096236 | 0.926 | 0.234 | 0 | Granule cell |
|  | 0 | 1.88615205 | 0.946 | 0.365 | 0 | Granule cell |
|  | 0 | 1.88319493 | 0.962 | 0.685 | 0 | Granule cell |
|  | 0 | 1.86765863 | 0.902 | 0.246 | 0 | Granule cell |
|  | 0 | 1.8622463  | 0.945 | 0.349 | 0 | Granule cell |
|  | 0 | 1.84729419 | 0.967 | 0.416 | 0 | Granule cell |
|  | 0 | 1.78653253 | 0.751 | 0.071 | 0 | Granule cell |
|  | 0 | 1.78312937 | 0.943 | 0.333 | 0 | Granule cell |
|  | 0 | 1.76700856 | 0.931 | 0.288 | 0 | Granule cell |
|  | 0 | 1.76368974 | 0.969 | 0.603 | 0 | Granule cell |
|  | 0 | 1.69539664 | 0.963 | 0.563 | 0 | Granule cell |
|  | 0 | 1.68622921 | 0.987 | 0.506 | 0 | Granule cell |
|  | 0 | 1.68539622 | 0.966 | 0.428 | 0 | Granule cell |
|  | 0 | 1.67351971 | 0.965 | 0.493 | 0 | Granule cell |
|  | 0 | 1.67290681 | 0.803 | 0.055 | 0 | Granule cell |
|  | 0 | 1.66962221 | 0.874 | 0.192 | 0 | Granule cell |
|  | 0 | 1.65996888 | 0.982 | 0.555 | 0 | Granule cell |
|  | 0 | 1.65982135 | 0.986 | 0.438 | 0 | Granule cell |
|  | 0 | 1.64116851 | 0.936 | 0.376 | 0 | Granule cell |
|  | 0 | 1.62288788 | 0.948 | 0.443 | 0 | Granule cell |
|  | 0 | 1.6173814  | 0.961 | 0.467 | 0 | Granule cell |
|  | 0 | 1.61544307 | 0.945 | 0.341 | 0 | Granule cell |
|  | 0 | 1.60694987 | 0.932 | 0.277 | 0 | Granule cell |
|  | 0 | 1.60684392 | 0.912 | 0.306 | 0 | Granule cell |
|  | 0 | 1.60595422 | 0.991 | 0.775 | 0 | Granule cell |
|  | 0 | 1.60413878 | 0.909 | 0.284 | 0 | Granule cell |
|  | 0 | 1.58900918 | 0.985 | 0.745 | 0 | Granule cell |
|  | 0 | 1.58117422 | 0.482 | 0.107 | 0 | Granule cell |
|  | 0 | 1.5772395  | 0.979 | 0.661 | 0 | Granule cell |
|  | 0 | 1.57650897 | 0.997 | 0.495 | 0 | Granule cell |
|  | 0 | 1.57005408 | 0.994 | 0.699 | 0 | Granule cell |
|  | 0 | 1.56546783 | 0.975 | 0.652 | 0 | Granule cell |
|  | 0 | 1.56314523 | 0.939 | 0.29  | 0 | Granule cell |
|  | 0 | 1.55649779 | 0.945 | 0.355 | 0 | Granule cell |
|  | 0 | 1.54148112 | 0.985 | 0.456 | 0 | Granule cell |
|  | 0 | 1.50800258 | 0.943 | 0.419 | 0 | Granule cell |
|  | 0 | 1.50106327 | 0.995 | 0.524 | 0 | Granule cell |
|  | 0 | 1.48900227 | 0.956 | 0.418 | 0 | Granule cell |



|  |   |            |       |       |   |              |
|--|---|------------|-------|-------|---|--------------|
|  | 0 | 1.48836372 | 0.931 | 0.395 | 0 | Granule cell |
|  | 0 | 1.4788343  | 0.966 | 0.364 | 0 | Granule cell |
|  | 0 | 1.47853446 | 0.851 | 0.177 | 0 | Granule cell |
|  | 0 | 1.47652677 | 0.992 | 0.722 | 0 | Granule cell |
|  | 0 | 1.46837606 | 0.859 | 0.141 | 0 | Granule cell |
|  | 0 | 1.46661615 | 0.943 | 0.337 | 0 | Granule cell |
|  | 0 | 1.46635089 | 0.876 | 0.331 | 0 | Granule cell |
|  | 0 | 1.46417257 | 0.986 | 0.403 | 0 | Granule cell |
|  | 0 | 1.46239268 | 0.99  | 0.635 | 0 | Granule cell |
|  | 0 | 1.44447532 | 0.968 | 0.411 | 0 | Granule cell |
|  | 0 | 1.44126729 | 0.946 | 0.35  | 0 | Granule cell |
|  | 0 | 1.44104288 | 0.976 | 0.571 | 0 | Granule cell |
|  | 0 | 1.42456487 | 0.903 | 0.238 | 0 | Granule cell |
|  | 0 | 1.41753585 | 0.971 | 0.486 | 0 | Granule cell |
|  | 0 | 1.39944378 | 0.982 | 0.689 | 0 | Granule cell |
|  | 0 | 1.39754094 | 0.969 | 0.363 | 0 | Granule cell |
|  | 0 | 1.3905449  | 0.813 | 0.225 | 0 | Granule cell |
|  | 0 | 1.38741165 | 0.939 | 0.45  | 0 | Granule cell |
|  | 0 | 1.38339114 | 0.975 | 0.461 | 0 | Granule cell |
|  | 0 | 1.37813995 | 0.99  | 0.5   | 0 | Granule cell |
|  | 0 | 1.36919733 | 0.961 | 0.558 | 0 | Granule cell |
|  | 0 | 1.36366803 | 0.989 | 0.534 | 0 | Granule cell |
|  | 0 | 1.3630404  | 0.96  | 0.397 | 0 | Granule cell |
|  | 0 | 1.35604977 | 0.987 | 0.559 | 0 | Granule cell |
|  | 0 | 1.35465677 | 0.717 | 0.155 | 0 | Granule cell |
|  | 0 | 1.35461747 | 0.992 | 0.584 | 0 | Granule cell |
|  | 0 | 1.34465324 | 0.945 | 0.458 | 0 | Granule cell |
|  | 0 | 1.33306477 | 0.96  | 0.498 | 0 | Granule cell |
|  | 0 | 1.33223232 | 0.907 | 0.381 | 0 | Granule cell |
|  | 0 | 1.3276243  | 0.988 | 0.563 | 0 | Granule cell |
|  | 0 | 1.31425573 | 0.921 | 0.411 | 0 | Granule cell |
|  | 0 | 1.31388729 | 0.88  | 0.225 | 0 | Granule cell |
|  | 0 | 1.30909221 | 0.975 | 0.464 | 0 | Granule cell |
|  | 0 | 1.30882067 | 0.96  | 0.446 | 0 | Granule cell |
|  | 0 | 1.30775822 | 0.993 | 0.709 | 0 | Granule cell |
|  | 0 | 1.29905929 | 0.877 | 0.251 | 0 | Granule cell |
|  | 0 | 1.29864234 | 0.847 | 0.308 | 0 | Granule cell |
|  | 0 | 1.28991735 | 0.923 | 0.366 | 0 | Granule cell |
|  | 0 | 0.45102299 | 0.739 | 0.249 | 0 | Granule cell |
|  | 0 | 1.15544383 | 0.894 | 0.248 | 0 | Granule cell |
|  | 0 | 1.28307615 | 0.991 | 0.452 | 0 | Granule cell |

|  |           |            |       |       |           |           |
|--|-----------|------------|-------|-------|-----------|-----------|
|  | 8.71E-94  | 2.46726051 | 0.643 | 0.635 | 2.46E-89  | Microglia |
|  | 4.38E-133 | 2.35547437 | 0.558 | 0.314 | 1.24E-128 | Microglia |
|  | 2.60E-281 | 2.13045138 | 0.684 | 0.437 | 7.37E-277 | Microglia |
|  | 9.21E-303 | 2.89884199 | 0.738 | 0.528 | 2.61E-298 | Microglia |
|  | 8.03E-305 | 2.18057026 | 0.688 | 0.414 | 2.27E-300 | Microglia |
|  | 0         | 4.46457539 | 0.856 | 0.027 | 0         | Microglia |
|  | 0         | 4.4115269  | 0.848 | 0.186 | 0         | Microglia |
|  | 0         | 4.16274807 | 0.853 | 0.243 | 0         | Microglia |
|  | 0         | 4.01292882 | 0.827 | 0.089 | 0         | Microglia |
|  | 0         | 3.87827843 | 0.802 | 0.019 | 0         | Microglia |
|  | 0         | 3.67368243 | 0.799 | 0.041 | 0         | Microglia |
|  | 0         | 3.61624964 | 0.809 | 0.019 | 0         | Microglia |
|  | 0         | 3.58798893 | 0.673 | 0.017 | 0         | Microglia |
|  | 0         | 3.55133189 | 0.912 | 0.67  | 0         | Microglia |
|  | 0         | 3.53928004 | 0.835 | 0.279 | 0         | Microglia |
|  | 0         | 3.44925467 | 0.761 | 0.139 | 0         | Microglia |
|  | 0         | 3.38420523 | 0.747 | 0.026 | 0         | Microglia |
|  | 0         | 3.26343138 | 0.365 | 0.011 | 0         | Microglia |
|  | 0         | 3.2400799  | 0.775 | 0.025 | 0         | Microglia |
|  | 0         | 3.23923211 | 0.786 | 0.254 | 0         | Microglia |
|  | 0         | 3.23032618 | 0.86  | 0.33  | 0         | Microglia |
|  | 0         | 3.22276618 | 0.769 | 0.061 | 0         | Microglia |
|  | 0         | 3.17627554 | 0.771 | 0.038 | 0         | Microglia |
|  | 0         | 3.14651142 | 0.647 | 0.028 | 0         | Microglia |
|  | 0         | 3.14396947 | 0.648 | 0.037 | 0         | Microglia |
|  | 0         | 3.13501732 | 0.773 | 0.126 | 0         | Microglia |
|  | 0         | 3.12240734 | 0.573 | 0.015 | 0         | Microglia |
|  | 0         | 3.12229268 | 0.825 | 0.542 | 0         | Microglia |
|  | 0         | 3.11047237 | 0.823 | 0.488 | 0         | Microglia |
|  | 0         | 3.04691054 | 0.749 | 0.014 | 0         | Microglia |
|  | 0         | 3.00449035 | 0.752 | 0.323 | 0         | Microglia |
|  | 0         | 2.99584698 | 0.726 | 0.011 | 0         | Microglia |
|  | 0         | 2.97753684 | 0.745 | 0.244 | 0         | Microglia |
|  | 0         | 2.96173813 | 0.866 | 0.332 | 0         | Microglia |
|  | 0         | 2.95530787 | 0.502 | 0.136 | 0         | Microglia |
|  | 0         | 2.92038211 | 0.788 | 0.402 | 0         | Microglia |
|  | 0         | 2.91256374 | 0.853 | 0.672 | 0         | Microglia |
|  | 0         | 2.87231829 | 0.631 | 0.089 | 0         | Microglia |
|  | 0         | 2.82059273 | 0.693 | 0.011 | 0         | Microglia |
|  | 0         | 2.77381901 | 0.694 | 0.11  | 0         | Microglia |
|  | 0         | 2.76817197 | 0.706 | 0.256 | 0         | Microglia |

|  |   |            |       |       |   |           |
|--|---|------------|-------|-------|---|-----------|
|  | 0 | 2.74988288 | 0.644 | 0.033 | 0 | Microglia |
|  | 0 | 2.7373366  | 0.856 | 0.654 | 0 | Microglia |
|  | 0 | 2.70098104 | 0.589 | 0.065 | 0 | Microglia |
|  | 0 | 2.69205202 | 0.638 | 0.024 | 0 | Microglia |
|  | 0 | 2.68948212 | 0.834 | 0.554 | 0 | Microglia |
|  | 0 | 2.68214946 | 0.627 | 0.031 | 0 | Microglia |
|  | 0 | 2.67540011 | 0.66  | 0.072 | 0 | Microglia |
|  | 0 | 2.67169259 | 0.679 | 0.014 | 0 | Microglia |
|  | 0 | 2.65903945 | 0.645 | 0.011 | 0 | Microglia |
|  | 0 | 2.64817251 | 0.639 | 0.305 | 0 | Microglia |
|  | 0 | 2.61268882 | 0.734 | 0.243 | 0 | Microglia |
|  | 0 | 2.58412787 | 0.677 | 0.22  | 0 | Microglia |
|  | 0 | 2.57462354 | 0.595 | 0.054 | 0 | Microglia |
|  | 0 | 2.57245309 | 0.63  | 0.012 | 0 | Microglia |
|  | 0 | 2.55830551 | 0.625 | 0.032 | 0 | Microglia |
|  | 0 | 2.55607305 | 0.673 | 0.016 | 0 | Microglia |
|  | 0 | 2.55188178 | 0.762 | 0.295 | 0 | Microglia |
|  | 0 | 2.53131571 | 0.741 | 0.419 | 0 | Microglia |
|  | 0 | 2.52492132 | 0.644 | 0.032 | 0 | Microglia |
|  | 0 | 2.52238428 | 0.834 | 0.472 | 0 | Microglia |
|  | 0 | 2.51155941 | 0.609 | 0.158 | 0 | Microglia |
|  | 0 | 2.49802212 | 0.845 | 0.507 | 0 | Microglia |
|  | 0 | 2.48519086 | 0.724 | 0.291 | 0 | Microglia |
|  | 0 | 2.47877982 | 0.391 | 0.017 | 0 | Microglia |
|  | 0 | 2.47630134 | 0.682 | 0.302 | 0 | Microglia |
|  | 0 | 2.4690586  | 0.571 | 0.089 | 0 | Microglia |
|  | 0 | 2.43812465 | 0.709 | 0.281 | 0 | Microglia |
|  | 0 | 2.41550817 | 0.824 | 0.558 | 0 | Microglia |
|  | 0 | 2.40083342 | 0.546 | 0.157 | 0 | Microglia |
|  | 0 | 2.39971386 | 0.832 | 0.646 | 0 | Microglia |
|  | 0 | 2.38749544 | 0.834 | 0.68  | 0 | Microglia |
|  | 0 | 2.38547479 | 0.757 | 0.424 | 0 | Microglia |
|  | 0 | 2.3808516  | 0.815 | 0.601 | 0 | Microglia |
|  | 0 | 2.37785734 | 0.817 | 0.643 | 0 | Microglia |
|  | 0 | 2.37419649 | 0.596 | 0.007 | 0 | Microglia |
|  | 0 | 2.37222125 | 0.621 | 0.268 | 0 | Microglia |
|  | 0 | 2.36795314 | 0.624 | 0.028 | 0 | Microglia |
|  | 0 | 2.36106888 | 0.712 | 0.379 | 0 | Microglia |
|  | 0 | 2.34999257 | 0.616 | 0.023 | 0 | Microglia |
|  | 0 | 2.33703298 | 0.738 | 0.346 | 0 | Microglia |
|  | 0 | 2.33512217 | 0.291 | 0.049 | 0 | Microglia |

|  |           |            |       |       |           |           |
|--|-----------|------------|-------|-------|-----------|-----------|
|  | 0         | 2.33256941 | 0.579 | 0.023 | 0         | Microglia |
|  | 0         | 2.29553122 | 0.6   | 0.093 | 0         | Microglia |
|  | 0         | 2.27595508 | 0.737 | 0.485 | 0         | Microglia |
|  | 0         | 2.25442161 | 0.604 | 0.193 | 0         | Microglia |
|  | 0         | 2.25180315 | 0.534 | 0.104 | 0         | Microglia |
|  | 0         | 2.21687938 | 0.602 | 0.074 | 0         | Microglia |
|  | 0         | 2.21660923 | 0.642 | 0.119 | 0         | Microglia |
|  | 0         | 2.2112909  | 0.546 | 0.013 | 0         | Microglia |
|  | 0         | 2.16519663 | 0.607 | 0.121 | 0         | Microglia |
|  | 0         | 2.15453237 | 0.558 | 0.018 | 0         | Microglia |
|  | 0         | 2.14868095 | 0.45  | 0.029 | 0         | Microglia |
|  | 0         | 2.12025504 | 0.668 | 0.339 | 0         | Microglia |
|  | 0         | 2.11529865 | 0.534 | 0.01  | 0         | Microglia |
|  | 0         | 2.11011503 | 0.576 | 0.028 | 0         | Microglia |
|  | 0         | 2.10073407 | 0.567 | 0.038 | 0         | Microglia |
|  | 0         | 2.10022417 | 0.569 | 0.129 | 0         | Microglia |
|  | 0         | 1.96186961 | 0.447 | 0.008 | 0         | Microglia |
|  | 0         | 1.83190365 | 0.287 | 0.007 | 0         | Microglia |
|  | 2.87E-13  | 0.15820367 | 0.551 | 0.344 | 8.13E-09  | NN        |
|  | 3.44E-19  | 0.43487521 | 0.53  | 0.345 | 9.74E-15  | NN        |
|  | 1.23E-57  | 1.43256103 | 0.971 | 0.79  | 3.48E-53  | NN        |
|  | 4.35E-66  | 0.54690973 | 0.838 | 0.423 | 1.23E-61  | NN        |
|  | 3.25E-68  | 1.46708613 | 0.885 | 0.466 | 9.21E-64  | NN        |
|  | 4.97E-98  | 1.78204985 | 0.721 | 0.275 | 1.41E-93  | NN        |
|  | 4.23E-101 | 1.4600762  | 0.958 | 0.533 | 1.20E-96  | NN        |
|  | 7.88E-109 | 1.3369022  | 0.932 | 0.492 | 2.23E-104 | NN        |
|  | 1.24E-109 | 1.48034939 | 0.906 | 0.468 | 3.52E-105 | NN        |
|  | 5.21E-110 | 1.42108027 | 0.979 | 0.629 | 1.47E-105 | NN        |
|  | 1.58E-115 | 1.70997671 | 0.791 | 0.309 | 4.47E-111 | NN        |
|  | 8.91E-117 | 1.31637235 | 0.943 | 0.471 | 2.52E-112 | NN        |
|  | 5.09E-121 | 1.31006994 | 0.935 | 0.462 | 1.44E-116 | NN        |
|  | 1.18E-121 | 1.50209357 | 0.95  | 0.437 | 3.34E-117 | NN        |
|  | 8.35E-123 | 1.63309264 | 0.966 | 0.588 | 2.36E-118 | NN        |
|  | 8.46E-124 | 1.46623377 | 0.979 | 0.595 | 2.40E-119 | NN        |
|  | 1.28E-124 | 1.60051586 | 0.995 | 0.74  | 3.64E-120 | NN        |
|  | 4.79E-125 | 1.41572424 | 0.979 | 0.517 | 1.36E-120 | NN        |
|  | 3.99E-125 | 1.37225453 | 0.916 | 0.446 | 1.13E-120 | NN        |
|  | 1.52E-125 | 1.67228207 | 0.992 | 0.613 | 4.30E-121 | NN        |
|  | 3.28E-126 | 1.43786223 | 0.922 | 0.4   | 9.28E-122 | NN        |
|  | 4.71E-128 | 1.83619221 | 0.966 | 0.571 | 1.33E-123 | NN        |
|  | 2.05E-129 | 1.65321374 | 0.971 | 0.523 | 5.80E-125 | NN        |

|  |           |            |       |       |           |    |
|--|-----------|------------|-------|-------|-----------|----|
|  | 3.48E-133 | 1.33260502 | 0.919 | 0.38  | 9.84E-129 | NN |
|  | 9.63E-134 | 1.52470832 | 0.984 | 0.681 | 2.73E-129 | NN |
|  | 2.27E-136 | 1.34342413 | 0.961 | 0.445 | 6.43E-132 | NN |
|  | 3.77E-137 | 1.42322636 | 0.977 | 0.552 | 1.07E-132 | NN |
|  | 2.18E-137 | 1.72775283 | 0.997 | 0.711 | 6.18E-133 | NN |
|  | 1.46E-137 | 2.01280425 | 0.969 | 0.568 | 4.13E-133 | NN |
|  | 3.00E-138 | 1.3320033  | 0.932 | 0.476 | 8.49E-134 | NN |
|  | 2.13E-139 | 1.37600865 | 0.937 | 0.436 | 6.04E-135 | NN |
|  | 1.67E-140 | 1.62367108 | 0.995 | 0.645 | 4.72E-136 | NN |
|  | 1.17E-140 | 1.68051043 | 0.932 | 0.494 | 3.32E-136 | NN |
|  | 1.02E-140 | 1.52459251 | 0.935 | 0.429 | 2.88E-136 | NN |
|  | 1.12E-141 | 1.40117971 | 0.966 | 0.524 | 3.16E-137 | NN |
|  | 5.76E-142 | 1.39842699 | 0.99  | 0.689 | 1.63E-137 | NN |
|  | 3.39E-142 | 0.95762865 | 0.896 | 0.32  | 9.59E-138 | NN |
|  | 7.64E-143 | 1.65000683 | 0.997 | 0.665 | 2.16E-138 | NN |
|  | 1.13E-143 | 1.33484211 | 0.937 | 0.417 | 3.21E-139 | NN |
|  | 1.80E-147 | 1.38444293 | 0.94  | 0.462 | 5.10E-143 | NN |
|  | 8.35E-148 | 1.86631094 | 0.99  | 0.636 | 2.36E-143 | NN |
|  | 5.69E-148 | 1.43223019 | 0.977 | 0.485 | 1.61E-143 | NN |
|  | 2.26E-148 | 1.8523633  | 0.997 | 0.826 | 6.41E-144 | NN |
|  | 3.01E-149 | 1.5279481  | 0.916 | 0.361 | 8.51E-145 | NN |
|  | 2.08E-149 | 0.55063436 | 0.608 | 0.144 | 5.88E-145 | NN |
|  | 1.68E-149 | 1.32885814 | 0.961 | 0.456 | 4.74E-145 | NN |
|  | 4.89E-150 | 1.69266995 | 0.935 | 0.39  | 1.39E-145 | NN |
|  | 1.30E-150 | 1.68671399 | 0.977 | 0.46  | 3.69E-146 | NN |
|  | 5.98E-151 | 1.7180496  | 0.961 | 0.488 | 1.69E-146 | NN |
|  | 3.10E-151 | 1.31845022 | 0.948 | 0.438 | 8.78E-147 | NN |
|  | 1.20E-151 | 1.55187282 | 0.924 | 0.466 | 3.40E-147 | NN |
|  | 5.81E-153 | 1.36072647 | 0.963 | 0.426 | 1.64E-148 | NN |
|  | 1.26E-153 | 1.36853878 | 0.953 | 0.388 | 3.56E-149 | NN |
|  | 8.24E-154 | 1.67214309 | 0.99  | 0.588 | 2.33E-149 | NN |
|  | 8.17E-154 | 1.69084857 | 0.992 | 0.528 | 2.31E-149 | NN |
|  | 1.19E-154 | 1.74609437 | 0.906 | 0.37  | 3.38E-150 | NN |
|  | 4.23E-155 | 1.50132019 | 0.911 | 0.343 | 1.20E-150 | NN |
|  | 3.37E-156 | 1.38965763 | 0.911 | 0.347 | 9.54E-152 | NN |
|  | 2.12E-156 | 1.55863954 | 0.914 | 0.382 | 6.00E-152 | NN |
|  | 5.85E-157 | 1.72357908 | 0.971 | 0.573 | 1.66E-152 | NN |
|  | 3.64E-157 | 1.42787789 | 0.95  | 0.452 | 1.03E-152 | NN |
|  | 9.06E-158 | 1.33645871 | 0.969 | 0.416 | 2.56E-153 | NN |
|  | 2.44E-158 | 2.06223089 | 0.997 | 0.733 | 6.91E-154 | NN |
|  | 6.28E-162 | 1.72998558 | 0.979 | 0.505 | 1.78E-157 | NN |

|  |           |            |       |       |           |              |
|--|-----------|------------|-------|-------|-----------|--------------|
|  | 2.67E-163 | 2.01101971 | 0.971 | 0.496 | 7.57E-159 | NN           |
|  | 2.61E-163 | 1.62477559 | 0.992 | 0.597 | 7.39E-159 | NN           |
|  | 9.44E-164 | 1.54108128 | 0.992 | 0.626 | 2.67E-159 | NN           |
|  | 3.28E-164 | 1.58013823 | 0.974 | 0.421 | 9.27E-160 | NN           |
|  | 2.83E-164 | 1.33264586 | 0.911 | 0.364 | 8.02E-160 | NN           |
|  | 3.75E-165 | 1.60538245 | 0.982 | 0.469 | 1.06E-160 | NN           |
|  | 2.72E-166 | 2.07842682 | 0.924 | 0.422 | 7.69E-162 | NN           |
|  | 1.96E-168 | 2.05170193 | 0.992 | 0.604 | 5.55E-164 | NN           |
|  | 3.86E-169 | 1.42012267 | 0.974 | 0.459 | 1.09E-164 | NN           |
|  | 6.59E-170 | 2.26573663 | 0.982 | 0.52  | 1.86E-165 | NN           |
|  | 2.71E-171 | 1.62090039 | 0.997 | 0.548 | 7.67E-167 | NN           |
|  | 2.89E-172 | 1.52365977 | 0.99  | 0.495 | 8.17E-168 | NN           |
|  | 7.16E-174 | 1.00090461 | 0.755 | 0.205 | 2.03E-169 | NN           |
|  | 3.11E-176 | 1.77005237 | 0.945 | 0.435 | 8.80E-172 | NN           |
|  | 1.14E-176 | 1.69081171 | 0.979 | 0.446 | 3.23E-172 | NN           |
|  | 4.54E-180 | 1.66807085 | 0.909 | 0.335 | 1.29E-175 | NN           |
|  | 4.16E-181 | 2.21882621 | 0.977 | 0.498 | 1.18E-176 | NN           |
|  | 2.31E-181 | 1.45409382 | 0.914 | 0.305 | 6.53E-177 | NN           |
|  | 3.62E-183 | 1.65054768 | 0.984 | 0.498 | 1.03E-178 | NN           |
|  | 9.35E-187 | 2.04851427 | 0.93  | 0.389 | 2.65E-182 | NN           |
|  | 1.82E-187 | 0.67476292 | 0.559 | 0.102 | 5.15E-183 | NN           |
|  | 1.63E-188 | 2.02126224 | 0.935 | 0.353 | 4.62E-184 | NN           |
|  | 3.23E-191 | 1.44657886 | 0.953 | 0.368 | 9.14E-187 | NN           |
|  | 4.42E-192 | 2.22098719 | 0.99  | 0.518 | 1.25E-187 | NN           |
|  | 3.55E-194 | 1.51453523 | 0.937 | 0.345 | 1.01E-189 | NN           |
|  | 3.49E-194 | 1.37404438 | 0.945 | 0.345 | 9.88E-190 | NN           |
|  | 2.34E-198 | 1.91949141 | 0.914 | 0.342 | 6.63E-194 | NN           |
|  | 2.34E-201 | 1.83804958 | 0.958 | 0.386 | 6.61E-197 | NN           |
|  | 2.34E-204 | 1.66951739 | 0.911 | 0.289 | 6.62E-200 | NN           |
|  | 4.69E-206 | 1.34334424 | 0.937 | 0.318 | 1.33E-201 | NN           |
|  | 1.15E-211 | 2.00277086 | 0.95  | 0.32  | 3.26E-207 | NN           |
|  | 1.29E-215 | 1.83569466 | 0.984 | 0.365 | 3.64E-211 | NN           |
|  | 6.88E-218 | 2.15661554 | 0.943 | 0.365 | 1.95E-213 | NN           |
|  | 5.40E-222 | 1.50211775 | 0.943 | 0.302 | 1.53E-217 | NN           |
|  | 4.75E-236 | 1.63345094 | 0.958 | 0.329 | 1.34E-231 | NN           |
|  | 1.42E-288 | 1.34685059 | 0.859 | 0.183 | 4.01E-284 | NN           |
|  | 0         | 4.21869365 | 0.903 | 0.04  | 0         | NSC/Astrocyt |
|  | 0         | 4.18872614 | 0.983 | 0.565 | 0         | NSC/Astrocyt |
|  | 0         | 4.03889716 | 0.924 | 0.319 | 0         | NSC/Astrocyt |
|  | 0         | 3.78616483 | 0.961 | 0.303 | 0         | NSC/Astrocyt |
|  | 0         | 3.6920365  | 0.98  | 0.357 | 0         | NSC/Astrocyt |

|  |   |            |       |       |   |              |
|--|---|------------|-------|-------|---|--------------|
|  | 0 | 3.63948703 | 0.958 | 0.552 | 0 | NSC/Astrocyt |
|  | 0 | 3.6384973  | 0.96  | 0.186 | 0 | NSC/Astrocyt |
|  | 0 | 3.47901188 | 0.729 | 0.114 | 0 | NSC/Astrocyt |
|  | 0 | 3.34317928 | 0.94  | 0.109 | 0 | NSC/Astrocyt |
|  | 0 | 3.14713611 | 0.931 | 0.119 | 0 | NSC/Astrocyt |
|  | 0 | 3.14674046 | 0.745 | 0.018 | 0 | NSC/Astrocyt |
|  | 0 | 3.11231047 | 0.97  | 0.445 | 0 | NSC/Astrocyt |
|  | 0 | 3.01672848 | 0.931 | 0.259 | 0 | NSC/Astrocyt |
|  | 0 | 2.97779643 | 0.968 | 0.406 | 0 | NSC/Astrocyt |
|  | 0 | 2.95138199 | 0.586 | 0.103 | 0 | NSC/Astrocyt |
|  | 0 | 2.95095227 | 0.812 | 0.288 | 0 | NSC/Astrocyt |
|  | 0 | 2.93053297 | 0.855 | 0.034 | 0 | NSC/Astrocyt |
|  | 0 | 2.9232437  | 0.896 | 0.092 | 0 | NSC/Astrocyt |
|  | 0 | 2.88465496 | 0.854 | 0.039 | 0 | NSC/Astrocyt |
|  | 0 | 2.88423475 | 0.931 | 0.384 | 0 | NSC/Astrocyt |
|  | 0 | 2.86290041 | 0.884 | 0.061 | 0 | NSC/Astrocyt |
|  | 0 | 2.79611534 | 0.917 | 0.136 | 0 | NSC/Astrocyt |
|  | 0 | 2.76309507 | 0.992 | 0.692 | 0 | NSC/Astrocyt |
|  | 0 | 2.71741208 | 0.8   | 0.03  | 0 | NSC/Astrocyt |
|  | 0 | 2.66334672 | 0.989 | 0.477 | 0 | NSC/Astrocyt |
|  | 0 | 2.65680262 | 0.729 | 0.113 | 0 | NSC/Astrocyt |
|  | 0 | 2.64378034 | 0.984 | 0.627 | 0 | NSC/Astrocyt |
|  | 0 | 2.64239481 | 0.946 | 0.289 | 0 | NSC/Astrocyt |
|  | 0 | 2.63128342 | 0.984 | 0.642 | 0 | NSC/Astrocyt |
|  | 0 | 2.62845324 | 0.973 | 0.62  | 0 | NSC/Astrocyt |
|  | 0 | 2.61992997 | 0.85  | 0.287 | 0 | NSC/Astrocyt |
|  | 0 | 2.54661868 | 0.936 | 0.502 | 0 | NSC/Astrocyt |
|  | 0 | 2.51715098 | 0.988 | 0.738 | 0 | NSC/Astrocyt |
|  | 0 | 2.49473917 | 0.896 | 0.225 | 0 | NSC/Astrocyt |
|  | 0 | 2.47197553 | 0.896 | 0.321 | 0 | NSC/Astrocyt |
|  | 0 | 2.46350134 | 0.621 | 0.013 | 0 | NSC/Astrocyt |
|  | 0 | 2.44451385 | 0.993 | 0.697 | 0 | NSC/Astrocyt |
|  | 0 | 2.427333   | 0.977 | 0.594 | 0 | NSC/Astrocyt |
|  | 0 | 2.414942   | 0.792 | 0.047 | 0 | NSC/Astrocyt |
|  | 0 | 2.39475033 | 0.752 | 0.031 | 0 | NSC/Astrocyt |
|  | 0 | 2.38832887 | 0.902 | 0.402 | 0 | NSC/Astrocyt |
|  | 0 | 2.37773482 | 0.654 | 0.015 | 0 | NSC/Astrocyt |
|  | 0 | 2.37713437 | 0.824 | 0.168 | 0 | NSC/Astrocyt |
|  | 0 | 2.3586999  | 0.968 | 0.571 | 0 | NSC/Astrocyt |
|  | 0 | 2.35651124 | 0.932 | 0.381 | 0 | NSC/Astrocyt |
|  | 0 | 2.35461943 | 0.924 | 0.248 | 0 | NSC/Astrocyt |

|  |   |            |       |       |   |              |
|--|---|------------|-------|-------|---|--------------|
|  | 0 | 2.33889923 | 0.853 | 0.178 | 0 | NSC/Astrocyt |
|  | 0 | 2.31896939 | 0.952 | 0.455 | 0 | NSC/Astrocyt |
|  | 0 | 2.25255748 | 0.843 | 0.207 | 0 | NSC/Astrocyt |
|  | 0 | 2.24815386 | 0.776 | 0.103 | 0 | NSC/Astrocyt |
|  | 0 | 2.24727729 | 0.823 | 0.076 | 0 | NSC/Astrocyt |
|  | 0 | 2.22900841 | 0.961 | 0.386 | 0 | NSC/Astrocyt |
|  | 0 | 2.22715898 | 0.991 | 0.835 | 0 | NSC/Astrocyt |
|  | 0 | 2.22452365 | 0.739 | 0.023 | 0 | NSC/Astrocyt |
|  | 0 | 2.22060334 | 0.548 | 0.02  | 0 | NSC/Astrocyt |
|  | 0 | 2.21409106 | 0.951 | 0.321 | 0 | NSC/Astrocyt |
|  | 0 | 2.21150195 | 0.884 | 0.328 | 0 | NSC/Astrocyt |
|  | 0 | 2.19394328 | 0.836 | 0.28  | 0 | NSC/Astrocyt |
|  | 0 | 2.17201737 | 0.982 | 0.733 | 0 | NSC/Astrocyt |
|  | 0 | 2.1661181  | 0.971 | 0.699 | 0 | NSC/Astrocyt |
|  | 0 | 2.15210351 | 0.782 | 0.023 | 0 | NSC/Astrocyt |
|  | 0 | 2.1467029  | 0.951 | 0.568 | 0 | NSC/Astrocyt |
|  | 0 | 2.14635528 | 0.768 | 0.045 | 0 | NSC/Astrocyt |
|  | 0 | 2.14257324 | 0.989 | 0.701 | 0 | NSC/Astrocyt |
|  | 0 | 2.12880766 | 0.744 | 0.075 | 0 | NSC/Astrocyt |
|  | 0 | 2.10431853 | 0.963 | 0.521 | 0 | NSC/Astrocyt |
|  | 0 | 2.09541783 | 0.823 | 0.181 | 0 | NSC/Astrocyt |
|  | 0 | 2.09293469 | 0.813 | 0.148 | 0 | NSC/Astrocyt |
|  | 0 | 2.08779038 | 0.751 | 0.042 | 0 | NSC/Astrocyt |
|  | 0 | 2.08193321 | 0.839 | 0.342 | 0 | NSC/Astrocyt |
|  | 0 | 2.08175652 | 0.87  | 0.424 | 0 | NSC/Astrocyt |
|  | 0 | 2.07802515 | 0.849 | 0.265 | 0 | NSC/Astrocyt |
|  | 0 | 2.06037974 | 0.737 | 0.201 | 0 | NSC/Astrocyt |
|  | 0 | 2.05275967 | 0.982 | 0.801 | 0 | NSC/Astrocyt |
|  | 0 | 2.04612155 | 0.939 | 0.493 | 0 | NSC/Astrocyt |
|  | 0 | 2.02928324 | 0.592 | 0.073 | 0 | NSC/Astrocyt |
|  | 0 | 2.00555726 | 0.927 | 0.581 | 0 | NSC/Astrocyt |
|  | 0 | 2.00336841 | 0.783 | 0.157 | 0 | NSC/Astrocyt |
|  | 0 | 1.99767726 | 0.778 | 0.039 | 0 | NSC/Astrocyt |
|  | 0 | 1.99564916 | 0.796 | 0.124 | 0 | NSC/Astrocyt |
|  | 0 | 1.98835318 | 0.905 | 0.464 | 0 | NSC/Astrocyt |
|  | 0 | 1.98697509 | 0.628 | 0.037 | 0 | NSC/Astrocyt |
|  | 0 | 1.98358333 | 0.963 | 0.677 | 0 | NSC/Astrocyt |
|  | 0 | 1.98286257 | 0.815 | 0.235 | 0 | NSC/Astrocyt |
|  | 0 | 1.97491904 | 0.882 | 0.228 | 0 | NSC/Astrocyt |
|  | 0 | 1.96685743 | 0.355 | 0.014 | 0 | NSC/Astrocyt |
|  | 0 | 1.96511853 | 0.866 | 0.457 | 0 | NSC/Astrocyt |



|  |   |            |       |       |   |              |
|--|---|------------|-------|-------|---|--------------|
|  | 0 | 1.9636622  | 0.769 | 0.29  | 0 | NSC/Astrocyt |
|  | 0 | 1.96292571 | 0.761 | 0.043 | 0 | NSC/Astrocyt |
|  | 0 | 1.96105339 | 0.752 | 0.117 | 0 | NSC/Astrocyt |
|  | 0 | 1.95056504 | 0.83  | 0.35  | 0 | NSC/Astrocyt |
|  | 0 | 1.94392539 | 0.982 | 0.845 | 0 | NSC/Astrocyt |
|  | 0 | 1.94219167 | 0.904 | 0.333 | 0 | NSC/Astrocyt |
|  | 0 | 1.92778977 | 0.813 | 0.185 | 0 | NSC/Astrocyt |
|  | 0 | 1.89632114 | 0.865 | 0.305 | 0 | NSC/Astrocyt |
|  | 0 | 1.88596643 | 0.669 | 0.144 | 0 | NSC/Astrocyt |
|  | 0 | 1.88528575 | 0.793 | 0.158 | 0 | NSC/Astrocyt |
|  | 0 | 1.8788209  | 0.705 | 0.143 | 0 | NSC/Astrocyt |
|  | 0 | 1.87730121 | 0.806 | 0.319 | 0 | NSC/Astrocyt |
|  | 0 | 1.87363614 | 0.963 | 0.469 | 0 | NSC/Astrocyt |
|  | 0 | 4.5543248  | 0.972 | 0.312 | 0 | Oligodendro  |
|  | 0 | 4.45607556 | 0.978 | 0.492 | 0 | Oligodendro  |
|  | 0 | 4.13391496 | 0.971 | 0.329 | 0 | Oligodendro  |
|  | 0 | 3.96254097 | 0.97  | 0.418 | 0 | Oligodendro  |
|  | 0 | 3.57470695 | 0.985 | 0.503 | 0 | Oligodendro  |
|  | 0 | 3.49222927 | 0.958 | 0.246 | 0 | Oligodendro  |
|  | 0 | 3.47904523 | 0.936 | 0.128 | 0 | Oligodendro  |
|  | 0 | 3.38397709 | 0.96  | 0.532 | 0 | Oligodendro  |
|  | 0 | 3.37899356 | 0.989 | 0.673 | 0 | Oligodendro  |
|  | 0 | 3.36576623 | 0.962 | 0.389 | 0 | Oligodendro  |
|  | 0 | 3.28775856 | 0.981 | 0.703 | 0 | Oligodendro  |
|  | 0 | 3.20325483 | 0.944 | 0.268 | 0 | Oligodendro  |
|  | 0 | 3.17550655 | 0.942 | 0.241 | 0 | Oligodendro  |
|  | 0 | 3.13937096 | 0.935 | 0.119 | 0 | Oligodendro  |
|  | 0 | 3.12606354 | 0.938 | 0.147 | 0 | Oligodendro  |
|  | 0 | 3.10847831 | 0.802 | 0.2   | 0 | Oligodendro  |
|  | 0 | 3.04263152 | 0.968 | 0.619 | 0 | Oligodendro  |
|  | 0 | 3.03961248 | 0.79  | 0.047 | 0 | Oligodendro  |
|  | 0 | 3.00981411 | 0.955 | 0.317 | 0 | Oligodendro  |
|  | 0 | 3.00587823 | 0.961 | 0.578 | 0 | Oligodendro  |
|  | 0 | 2.95928014 | 0.868 | 0.29  | 0 | Oligodendro  |
|  | 0 | 2.9184533  | 0.928 | 0.241 | 0 | Oligodendro  |
|  | 0 | 2.90805083 | 0.968 | 0.612 | 0 | Oligodendro  |
|  | 0 | 2.90797569 | 0.887 | 0.113 | 0 | Oligodendro  |
|  | 0 | 2.83648926 | 0.894 | 0.088 | 0 | Oligodendro  |
|  | 0 | 2.82898859 | 0.915 | 0.224 | 0 | Oligodendro  |
|  | 0 | 2.81367136 | 0.853 | 0.115 | 0 | Oligodendro  |
|  | 0 | 2.80037946 | 0.977 | 0.715 | 0 | Oligodendro  |

|  |   |            |       |       |   |             |
|--|---|------------|-------|-------|---|-------------|
|  | 0 | 2.78263282 | 0.814 | 0.2   | 0 | Oligodendro |
|  | 0 | 2.77254504 | 0.937 | 0.495 | 0 | Oligodendro |
|  | 0 | 2.76936787 | 0.992 | 0.764 | 0 | Oligodendro |
|  | 0 | 2.76052539 | 0.927 | 0.303 | 0 | Oligodendro |
|  | 0 | 2.72594747 | 0.929 | 0.305 | 0 | Oligodendro |
|  | 0 | 2.72401642 | 0.839 | 0.319 | 0 | Oligodendro |
|  | 0 | 2.71289945 | 0.848 | 0.363 | 0 | Oligodendro |
|  | 0 | 2.70324317 | 0.947 | 0.63  | 0 | Oligodendro |
|  | 0 | 2.69164308 | 0.955 | 0.442 | 0 | Oligodendro |
|  | 0 | 2.68211729 | 0.971 | 0.687 | 0 | Oligodendro |
|  | 0 | 2.67276056 | 0.954 | 0.417 | 0 | Oligodendro |
|  | 0 | 2.66632099 | 0.967 | 0.696 | 0 | Oligodendro |
|  | 0 | 2.64872407 | 0.84  | 0.15  | 0 | Oligodendro |
|  | 0 | 2.63886134 | 0.858 | 0.065 | 0 | Oligodendro |
|  | 0 | 2.63303907 | 0.971 | 0.484 | 0 | Oligodendro |
|  | 0 | 2.61677095 | 0.558 | 0.055 | 0 | Oligodendro |
|  | 0 | 2.59580583 | 0.854 | 0.083 | 0 | Oligodendro |
|  | 0 | 2.5881975  | 0.783 | 0.057 | 0 | Oligodendro |
|  | 0 | 2.57691776 | 0.889 | 0.236 | 0 | Oligodendro |
|  | 0 | 2.57095057 | 0.896 | 0.275 | 0 | Oligodendro |
|  | 0 | 2.56961251 | 0.92  | 0.437 | 0 | Oligodendro |
|  | 0 | 2.53909765 | 0.855 | 0.089 | 0 | Oligodendro |
|  | 0 | 2.53228729 | 0.951 | 0.617 | 0 | Oligodendro |
|  | 0 | 2.51034693 | 0.85  | 0.093 | 0 | Oligodendro |
|  | 0 | 2.50891926 | 0.82  | 0.119 | 0 | Oligodendro |
|  | 0 | 2.48549369 | 0.923 | 0.481 | 0 | Oligodendro |
|  | 0 | 2.46546362 | 0.86  | 0.08  | 0 | Oligodendro |
|  | 0 | 2.46340909 | 0.943 | 0.551 | 0 | Oligodendro |
|  | 0 | 2.45168992 | 0.922 | 0.566 | 0 | Oligodendro |
|  | 0 | 2.42436383 | 0.769 | 0.111 | 0 | Oligodendro |
|  | 0 | 2.40908552 | 0.848 | 0.101 | 0 | Oligodendro |
|  | 0 | 2.4052848  | 0.862 | 0.112 | 0 | Oligodendro |
|  | 0 | 2.40099789 | 0.98  | 0.715 | 0 | Oligodendro |
|  | 0 | 2.39658223 | 0.593 | 0.137 | 0 | Oligodendro |
|  | 0 | 2.38755047 | 0.806 | 0.049 | 0 | Oligodendro |
|  | 0 | 2.38420234 | 0.949 | 0.406 | 0 | Oligodendro |
|  | 0 | 2.37637787 | 0.862 | 0.491 | 0 | Oligodendro |
|  | 0 | 2.34677469 | 0.761 | 0.066 | 0 | Oligodendro |
|  | 0 | 2.33510757 | 0.861 | 0.363 | 0 | Oligodendro |
|  | 0 | 2.32869332 | 0.782 | 0.178 | 0 | Oligodendro |
|  | 0 | 2.30123674 | 0.96  | 0.678 | 0 | Oligodendro |

|  |           |            |       |       |           |             |
|--|-----------|------------|-------|-------|-----------|-------------|
|  | 0         | 2.29186763 | 0.91  | 0.396 | 0         | Oligodendro |
|  | 0         | 2.2741464  | 0.885 | 0.444 | 0         | Oligodendro |
|  | 0         | 2.25521088 | 0.828 | 0.134 | 0         | Oligodendro |
|  | 0         | 2.25362599 | 0.719 | 0.054 | 0         | Oligodendro |
|  | 0         | 2.25210105 | 0.652 | 0.077 | 0         | Oligodendro |
|  | 0         | 2.24537153 | 0.828 | 0.186 | 0         | Oligodendro |
|  | 0         | 2.23606637 | 0.82  | 0.4   | 0         | Oligodendro |
|  | 0         | 2.23030994 | 0.965 | 0.804 | 0         | Oligodendro |
|  | 0         | 2.22715814 | 0.942 | 0.699 | 0         | Oligodendro |
|  | 0         | 2.22425906 | 0.957 | 0.619 | 0         | Oligodendro |
|  | 0         | 2.21709398 | 0.742 | 0.038 | 0         | Oligodendro |
|  | 0         | 2.21624788 | 0.882 | 0.146 | 0         | Oligodendro |
|  | 0         | 2.21384788 | 0.912 | 0.645 | 0         | Oligodendro |
|  | 0         | 2.18848586 | 0.894 | 0.313 | 0         | Oligodendro |
|  | 0         | 2.18703564 | 0.783 | 0.043 | 0         | Oligodendro |
|  | 0         | 2.18429602 | 0.961 | 0.618 | 0         | Oligodendro |
|  | 0         | 2.17704856 | 0.778 | 0.236 | 0         | Oligodendro |
|  | 0         | 2.15696859 | 0.837 | 0.385 | 0         | Oligodendro |
|  | 0         | 2.15388551 | 0.963 | 0.675 | 0         | Oligodendro |
|  | 0         | 2.15204232 | 0.773 | 0.206 | 0         | Oligodendro |
|  | 0         | 2.14485414 | 0.798 | 0.076 | 0         | Oligodendro |
|  | 0         | 2.14130374 | 0.805 | 0.155 | 0         | Oligodendro |
|  | 0         | 2.14037221 | 0.719 | 0.377 | 0         | Oligodendro |
|  | 0         | 2.12690957 | 0.832 | 0.324 | 0         | Oligodendro |
|  | 0         | 2.12400491 | 0.856 | 0.166 | 0         | Oligodendro |
|  | 0         | 2.11504241 | 0.969 | 0.568 | 0         | Oligodendro |
|  | 0         | 2.09759878 | 0.917 | 0.51  | 0         | Oligodendro |
|  | 0         | 2.08478464 | 0.681 | 0.058 | 0         | Oligodendro |
|  | 0         | 2.08332531 | 0.669 | 0.061 | 0         | Oligodendro |
|  | 0         | 2.08274318 | 0.896 | 0.488 | 0         | Oligodendro |
|  | 0         | 2.08176689 | 0.945 | 0.7   | 0         | Oligodendro |
|  | 3.37E-248 | 1.80458503 | 0.773 | 0.372 | 9.53E-244 | OPC         |
|  | 0         | 4.94435413 | 0.993 | 0.238 | 0         | OPC         |
|  | 0         | 3.81044501 | 0.997 | 0.163 | 0         | OPC         |
|  | 0         | 3.65068584 | 0.992 | 0.421 | 0         | OPC         |
|  | 0         | 3.55830939 | 0.999 | 0.553 | 0         | OPC         |
|  | 0         | 3.38631065 | 0.988 | 0.16  | 0         | OPC         |
|  | 0         | 3.32205026 | 0.986 | 0.139 | 0         | OPC         |
|  | 0         | 3.30679561 | 0.997 | 0.576 | 0         | OPC         |
|  | 0         | 3.22101414 | 0.887 | 0.009 | 0         | OPC         |
|  | 0         | 3.20000074 | 0.995 | 0.432 | 0         | OPC         |

|  |   |            |       |       |   |     |
|--|---|------------|-------|-------|---|-----|
|  | 0 | 3.17339615 | 0.988 | 0.224 | 0 | OPC |
|  | 0 | 3.0412638  | 0.985 | 0.281 | 0 | OPC |
|  | 0 | 3.0140834  | 0.979 | 0.474 | 0 | OPC |
|  | 0 | 2.99879548 | 0.973 | 0.148 | 0 | OPC |
|  | 0 | 2.98681488 | 0.992 | 0.717 | 0 | OPC |
|  | 0 | 2.93640528 | 0.986 | 0.54  | 0 | OPC |
|  | 0 | 2.79019892 | 0.988 | 0.544 | 0 | OPC |
|  | 0 | 2.77432066 | 0.977 | 0.088 | 0 | OPC |
|  | 0 | 2.76181402 | 0.973 | 0.235 | 0 | OPC |
|  | 0 | 2.74303697 | 0.987 | 0.474 | 0 | OPC |
|  | 0 | 2.54398976 | 0.952 | 0.142 | 0 | OPC |
|  | 0 | 2.52960086 | 0.988 | 0.541 | 0 | OPC |
|  | 0 | 2.50968177 | 0.916 | 0.192 | 0 | OPC |
|  | 0 | 2.46788879 | 0.988 | 0.473 | 0 | OPC |
|  | 0 | 2.43302639 | 0.986 | 0.698 | 0 | OPC |
|  | 0 | 2.42421197 | 0.698 | 0.057 | 0 | OPC |
|  | 0 | 2.39273796 | 0.979 | 0.375 | 0 | OPC |
|  | 0 | 2.36419328 | 0.976 | 0.498 | 0 | OPC |
|  | 0 | 2.36095104 | 0.968 | 0.18  | 0 | OPC |
|  | 0 | 2.34211472 | 0.988 | 0.687 | 0 | OPC |
|  | 0 | 2.33479979 | 0.981 | 0.397 | 0 | OPC |
|  | 0 | 2.31765842 | 0.976 | 0.465 | 0 | OPC |
|  | 0 | 2.29228645 | 0.91  | 0.121 | 0 | OPC |
|  | 0 | 2.26610285 | 0.926 | 0.1   | 0 | OPC |
|  | 0 | 2.25571647 | 0.92  | 0.088 | 0 | OPC |
|  | 0 | 2.13806144 | 0.976 | 0.43  | 0 | OPC |
|  | 0 | 2.11389488 | 0.863 | 0.18  | 0 | OPC |
|  | 0 | 2.10407195 | 0.793 | 0.065 | 0 | OPC |
|  | 0 | 2.09895315 | 0.965 | 0.342 | 0 | OPC |
|  | 0 | 2.06744933 | 0.919 | 0.159 | 0 | OPC |
|  | 0 | 2.04199979 | 0.936 | 0.205 | 0 | OPC |
|  | 0 | 2.038503   | 0.888 | 0.151 | 0 | OPC |
|  | 0 | 2.03509527 | 0.936 | 0.235 | 0 | OPC |
|  | 0 | 2.01854335 | 0.914 | 0.295 | 0 | OPC |
|  | 0 | 1.99436968 | 0.946 | 0.368 | 0 | OPC |
|  | 0 | 1.97783223 | 0.876 | 0.101 | 0 | OPC |
|  | 0 | 1.97568828 | 0.995 | 0.401 | 0 | OPC |
|  | 0 | 1.94144548 | 0.928 | 0.236 | 0 | OPC |
|  | 0 | 1.9094277  | 0.941 | 0.289 | 0 | OPC |
|  | 0 | 1.90641198 | 0.928 | 0.257 | 0 | OPC |
|  | 0 | 1.89196602 | 0.989 | 0.56  | 0 | OPC |

|  |   |            |       |       |   |     |
|--|---|------------|-------|-------|---|-----|
|  | 0 | 1.88586213 | 0.993 | 0.597 | 0 | OPC |
|  | 0 | 1.87065006 | 0.898 | 0.141 | 0 | OPC |
|  | 0 | 1.86312306 | 0.977 | 0.602 | 0 | OPC |
|  | 0 | 1.8621401  | 0.967 | 0.555 | 0 | OPC |
|  | 0 | 1.84014219 | 0.906 | 0.273 | 0 | OPC |
|  | 0 | 1.82402979 | 0.925 | 0.416 | 0 | OPC |
|  | 0 | 1.82277773 | 0.979 | 0.569 | 0 | OPC |
|  | 0 | 1.81134375 | 0.911 | 0.307 | 0 | OPC |
|  | 0 | 1.79701174 | 0.995 | 0.668 | 0 | OPC |
|  | 0 | 1.79641592 | 0.924 | 0.192 | 0 | OPC |
|  | 0 | 1.79420103 | 0.96  | 0.569 | 0 | OPC |
|  | 0 | 1.77724577 | 0.881 | 0.165 | 0 | OPC |
|  | 0 | 1.77209357 | 0.989 | 0.619 | 0 | OPC |
|  | 0 | 1.76685053 | 0.825 | 0.021 | 0 | OPC |
|  | 0 | 1.7631793  | 0.782 | 0.07  | 0 | OPC |
|  | 0 | 1.75995895 | 0.765 | 0.07  | 0 | OPC |
|  | 0 | 1.75794242 | 0.91  | 0.163 | 0 | OPC |
|  | 0 | 1.74826202 | 0.956 | 0.472 | 0 | OPC |
|  | 0 | 1.73457361 | 0.997 | 0.625 | 0 | OPC |
|  | 0 | 1.7198858  | 0.906 | 0.224 | 0 | OPC |
|  | 0 | 1.71431436 | 0.984 | 0.698 | 0 | OPC |
|  | 0 | 1.70672518 | 0.824 | 0.077 | 0 | OPC |
|  | 0 | 1.68803038 | 0.821 | 0.196 | 0 | OPC |
|  | 0 | 1.6617722  | 0.857 | 0.256 | 0 | OPC |
|  | 0 | 1.66090931 | 0.993 | 0.795 | 0 | OPC |
|  | 0 | 1.66006789 | 0.861 | 0.119 | 0 | OPC |
|  | 0 | 1.65315751 | 0.984 | 0.564 | 0 | OPC |
|  | 0 | 1.65154492 | 0.803 | 0.074 | 0 | OPC |
|  | 0 | 1.64028889 | 0.995 | 0.644 | 0 | OPC |
|  | 0 | 1.63852601 | 0.872 | 0.202 | 0 | OPC |
|  | 0 | 1.63828695 | 0.995 | 0.66  | 0 | OPC |
|  | 0 | 1.62924749 | 0.842 | 0.188 | 0 | OPC |
|  | 0 | 1.62897255 | 0.854 | 0.172 | 0 | OPC |
|  | 0 | 1.62679227 | 0.93  | 0.143 | 0 | OPC |
|  | 0 | 1.62601017 | 0.704 | 0.043 | 0 | OPC |
|  | 0 | 1.62176915 | 0.857 | 0.169 | 0 | OPC |
|  | 0 | 1.61175901 | 0.632 | 0.053 | 0 | OPC |
|  | 0 | 1.60664034 | 0.925 | 0.281 | 0 | OPC |
|  | 0 | 1.60659614 | 0.991 | 0.652 | 0 | OPC |
|  | 0 | 1.60451563 | 0.992 | 0.731 | 0 | OPC |
|  | 0 | 1.58819162 | 0.972 | 0.633 | 0 | OPC |

|  |          |            |       |       |            |          |
|--|----------|------------|-------|-------|------------|----------|
|  | 0        | 1.58485988 | 0.956 | 0.499 | 0          | OPC      |
|  | 0        | 1.5848513  | 0.982 | 0.557 | 0          | OPC      |
|  | 0        | 1.56647422 | 0.82  | 0.225 | 0          | OPC      |
|  | 0        | 1.56497075 | 0.86  | 0.258 | 0          | OPC      |
|  | 0        | 1.56139949 | 0.837 | 0.308 | 0          | OPC      |
|  | 0        | 1.55755891 | 0.928 | 0.33  | 0          | OPC      |
|  | 0        | 1.32457948 | 0.749 | 0.079 | 0          | OPC      |
|  | 0        | 1.4189805  | 0.709 | 0.014 | 0          | OPC      |
|  | 3.70E-09 | 1.78218478 | 0.454 | 0.317 | 0.00010485 | Pericyte |
|  | 7.47E-10 | 2.29756361 | 0.471 | 0.327 | 2.11E-05   | Pericyte |
|  | 3.47E-11 | 1.80452604 | 0.597 | 0.486 | 9.82E-07   | Pericyte |
|  | 1.17E-11 | 1.914587   | 0.504 | 0.306 | 3.32E-07   | Pericyte |
|  | 5.46E-13 | 1.95998759 | 0.672 | 0.606 | 1.55E-08   | Pericyte |
|  | 8.47E-14 | 2.10130866 | 0.588 | 0.416 | 2.40E-09   | Pericyte |
|  | 8.54E-15 | 1.8578418  | 0.345 | 0.141 | 2.42E-10   | Pericyte |
|  | 3.91E-15 | 1.77194703 | 0.479 | 0.227 | 1.11E-10   | Pericyte |
|  | 6.64E-16 | 2.18703349 | 0.479 | 0.235 | 1.88E-11   | Pericyte |
|  | 3.49E-17 | 1.83457965 | 0.765 | 0.666 | 9.89E-13   | Pericyte |
|  | 3.03E-17 | 4.44177991 | 0.37  | 0.147 | 8.57E-13   | Pericyte |
|  | 2.42E-17 | 2.92973414 | 0.689 | 0.506 | 6.84E-13   | Pericyte |
|  | 1.95E-19 | 1.91793029 | 0.378 | 0.128 | 5.52E-15   | Pericyte |
|  | 7.17E-20 | 2.18144844 | 0.697 | 0.445 | 2.03E-15   | Pericyte |
|  | 2.04E-20 | 2.2380981  | 0.496 | 0.227 | 5.78E-16   | Pericyte |
|  | 2.42E-21 | 2.5374176  | 0.286 | 0.071 | 6.84E-17   | Pericyte |
|  | 2.38E-21 | 2.46069814 | 0.513 | 0.223 | 6.72E-17   | Pericyte |
|  | 1.45E-21 | 2.16424123 | 0.655 | 0.385 | 4.11E-17   | Pericyte |
|  | 1.05E-21 | 1.89542039 | 0.504 | 0.227 | 2.98E-17   | Pericyte |
|  | 3.12E-22 | 1.75966456 | 0.353 | 0.105 | 8.84E-18   | Pericyte |
|  | 2.19E-22 | 2.23962297 | 0.513 | 0.218 | 6.19E-18   | Pericyte |
|  | 1.70E-23 | 2.49551745 | 0.504 | 0.2   | 4.82E-19   | Pericyte |
|  | 4.47E-24 | 2.1655428  | 0.294 | 0.07  | 1.27E-19   | Pericyte |
|  | 1.21E-25 | 2.56342564 | 0.563 | 0.258 | 3.44E-21   | Pericyte |
|  | 6.55E-26 | 2.60062654 | 0.429 | 0.136 | 1.85E-21   | Pericyte |
|  | 3.04E-27 | 2.13003201 | 0.58  | 0.271 | 8.60E-23   | Pericyte |
|  | 1.32E-27 | 2.13105071 | 0.571 | 0.252 | 3.74E-23   | Pericyte |
|  | 2.97E-29 | 2.28812172 | 0.412 | 0.12  | 8.41E-25   | Pericyte |
|  | 2.46E-29 | 3.03747092 | 0.513 | 0.19  | 6.96E-25   | Pericyte |
|  | 3.47E-30 | 1.85311847 | 0.445 | 0.13  | 9.83E-26   | Pericyte |
|  | 1.88E-30 | 2.12061514 | 0.597 | 0.236 | 5.31E-26   | Pericyte |
|  | 1.58E-33 | 2.69596167 | 0.807 | 0.544 | 4.48E-29   | Pericyte |
|  | 1.12E-33 | 2.31788808 | 0.513 | 0.169 | 3.18E-29   | Pericyte |

|  |           |            |       |       |           |          |
|--|-----------|------------|-------|-------|-----------|----------|
|  | 5.27E-35  | 2.09532041 | 0.378 | 0.086 | 1.49E-30  | Pericyte |
|  | 8.47E-37  | 2.28760554 | 0.555 | 0.179 | 2.40E-32  | Pericyte |
|  | 4.60E-37  | 2.42497971 | 0.412 | 0.096 | 1.30E-32  | Pericyte |
|  | 3.37E-37  | 2.62761116 | 0.714 | 0.323 | 9.54E-33  | Pericyte |
|  | 3.18E-38  | 2.03708778 | 0.496 | 0.133 | 8.99E-34  | Pericyte |
|  | 8.19E-39  | 2.14789052 | 0.151 | 0.013 | 2.32E-34  | Pericyte |
|  | 1.73E-39  | 2.34481083 | 0.866 | 0.512 | 4.91E-35  | Pericyte |
|  | 5.72E-40  | 3.12851802 | 0.782 | 0.458 | 1.62E-35  | Pericyte |
|  | 3.31E-41  | 1.93363705 | 0.521 | 0.139 | 9.37E-37  | Pericyte |
|  | 1.54E-41  | 1.89530797 | 0.63  | 0.22  | 4.37E-37  | Pericyte |
|  | 2.67E-42  | 1.8611783  | 0.454 | 0.106 | 7.57E-38  | Pericyte |
|  | 5.45E-44  | 1.74085742 | 0.319 | 0.051 | 1.54E-39  | Pericyte |
|  | 6.79E-49  | 1.84723748 | 0.387 | 0.067 | 1.92E-44  | Pericyte |
|  | 3.22E-49  | 3.02842029 | 0.277 | 0.034 | 9.12E-45  | Pericyte |
|  | 2.56E-50  | 1.99840249 | 0.563 | 0.144 | 7.25E-46  | Pericyte |
|  | 2.43E-51  | 4.08808726 | 0.655 | 0.2   | 6.88E-47  | Pericyte |
|  | 1.10E-53  | 2.68628126 | 0.664 | 0.199 | 3.12E-49  | Pericyte |
|  | 5.09E-54  | 1.80717774 | 0.403 | 0.065 | 1.44E-49  | Pericyte |
|  | 5.98E-55  | 3.12609135 | 0.664 | 0.19  | 1.69E-50  | Pericyte |
|  | 4.53E-56  | 2.20298415 | 0.58  | 0.135 | 1.28E-51  | Pericyte |
|  | 1.03E-57  | 2.97229992 | 0.723 | 0.23  | 2.91E-53  | Pericyte |
|  | 1.48E-58  | 2.21224692 | 0.672 | 0.187 | 4.18E-54  | Pericyte |
|  | 8.17E-59  | 2.48916697 | 0.706 | 0.204 | 2.31E-54  | Pericyte |
|  | 1.34E-61  | 2.77943344 | 0.521 | 0.102 | 3.80E-57  | Pericyte |
|  | 7.03E-64  | 2.5717442  | 0.521 | 0.098 | 1.99E-59  | Pericyte |
|  | 4.39E-65  | 1.81045702 | 0.244 | 0.02  | 1.24E-60  | Pericyte |
|  | 3.27E-65  | 2.7260245  | 0.681 | 0.178 | 9.26E-61  | Pericyte |
|  | 3.78E-71  | 1.77810524 | 0.235 | 0.017 | 1.07E-66  | Pericyte |
|  | 6.94E-75  | 2.75556728 | 0.647 | 0.136 | 1.96E-70  | Pericyte |
|  | 5.61E-75  | 2.36085858 | 0.664 | 0.141 | 1.59E-70  | Pericyte |
|  | 9.97E-77  | 2.17750895 | 0.588 | 0.103 | 2.82E-72  | Pericyte |
|  | 1.29E-79  | 2.0636433  | 0.412 | 0.047 | 3.66E-75  | Pericyte |
|  | 2.76E-82  | 2.76531403 | 0.689 | 0.137 | 7.81E-78  | Pericyte |
|  | 2.21E-86  | 1.7498979  | 0.303 | 0.024 | 6.27E-82  | Pericyte |
|  | 1.59E-91  | 2.53092901 | 0.613 | 0.1   | 4.51E-87  | Pericyte |
|  | 4.18E-96  | 4.28392016 | 0.529 | 0.069 | 1.18E-91  | Pericyte |
|  | 2.79E-102 | 2.26489538 | 0.496 | 0.056 | 7.90E-98  | Pericyte |
|  | 2.08E-112 | 2.33605376 | 0.429 | 0.037 | 5.88E-108 | Pericyte |
|  | 3.44E-113 | 2.37960296 | 0.429 | 0.037 | 9.73E-109 | Pericyte |
|  | 2.44E-118 | 2.40026204 | 0.479 | 0.044 | 6.91E-114 | Pericyte |
|  | 2.07E-120 | 2.24910093 | 0.403 | 0.031 | 5.85E-116 | Pericyte |

|  |           |            |       |       |           |          |
|--|-----------|------------|-------|-------|-----------|----------|
|  | 3.44E-122 | 2.57421825 | 0.496 | 0.047 | 9.74E-118 | Pericyte |
|  | 5.51E-132 | 2.50240289 | 0.395 | 0.027 | 1.56E-127 | Pericyte |
|  | 3.85E-134 | 2.09932348 | 0.328 | 0.018 | 1.09E-129 | Pericyte |
|  | 7.96E-154 | 1.87470045 | 0.387 | 0.022 | 2.25E-149 | Pericyte |
|  | 5.70E-162 | 2.78293261 | 0.706 | 0.075 | 1.61E-157 | Pericyte |
|  | 7.65E-163 | 2.10817611 | 0.462 | 0.03  | 2.16E-158 | Pericyte |
|  | 1.76E-177 | 1.87061643 | 0.403 | 0.021 | 4.98E-173 | Pericyte |
|  | 4.92E-178 | 1.76426013 | 0.311 | 0.012 | 1.39E-173 | Pericyte |
|  | 1.32E-178 | 2.71740849 | 0.672 | 0.06  | 3.73E-174 | Pericyte |
|  | 4.60E-186 | 1.78942773 | 0.504 | 0.031 | 1.30E-181 | Pericyte |
|  | 1.29E-216 | 3.1148488  | 0.731 | 0.061 | 3.65E-212 | Pericyte |
|  | 4.24E-226 | 2.24271881 | 0.546 | 0.031 | 1.20E-221 | Pericyte |
|  | 9.93E-249 | 2.38335728 | 0.521 | 0.025 | 2.81E-244 | Pericyte |
|  | 1.11E-274 | 2.22473831 | 0.429 | 0.015 | 3.14E-270 | Pericyte |
|  | 6.91E-291 | 2.31033047 | 0.529 | 0.022 | 1.96E-286 | Pericyte |
|  | 0         | 4.07695886 | 0.756 | 0.028 | 0         | Pericyte |
|  | 0         | 3.25398948 | 0.521 | 0.004 | 0         | Pericyte |
|  | 0         | 2.88324814 | 0.571 | 0.015 | 0         | Pericyte |
|  | 0         | 2.83788382 | 0.529 | 0.011 | 0         | Pericyte |
|  | 0         | 2.44108575 | 0.513 | 0.002 | 0         | Pericyte |
|  | 0         | 1.79815032 | 0.504 | 0.001 | 0         | Pericyte |
|  | 0         | 1.76529381 | 0.403 | 0.008 | 0         | Pericyte |
|  | 0         | 1.75525348 | 0.42  | 0.002 | 0         | Pericyte |



|             |
|-------------|
|             |
| gene        |
| NTNG1       |
| LRP1B       |
| BRINP3      |
| KIAA1217    |
| ADAMTSL1    |
| AC109466.1  |
| RALYL       |
| TSHZ2       |
| PTPRT       |
| CNTN5       |
| KCNH7       |
| ROBO2       |
| KHDRBS2     |
| ASIC2       |
| CDH18       |
| CDH12       |
| ZNF804B     |
| PCDH11Y     |
| HECW1       |
| NRG1        |
| CNTNAP5     |
| GALNTL6     |
| RIMS2       |
| IQCJ-SCHIP1 |
| PCDH11X     |
| LHFPL6      |
| OLFM3       |
| PTPRD       |
| ZNF385B     |
| FRAS1       |
| SORBS2      |
| CADPS2      |
| COL24A1     |
| MLIP        |
| VSNL1       |
| SATB2       |
| CNTN4       |
| AC008415.1  |

|            |
|------------|
| PTPRR      |
| EFNA5      |
| VWC2L      |
| GHR        |
| KCNB2      |
| GABRB2     |
| LINC01122  |
| NELL1      |
| OXR1       |
| SORCS1     |
| NRGN       |
| STXBP5L    |
| BMPER      |
| HS6ST3     |
| PHACTR1    |
| HS3ST4     |
| MDGA2      |
| CHRM3      |
| GRM8       |
| GABRG3     |
| ARPP21     |
| FGF12      |
| KCNH5      |
| PPM1L      |
| GDA        |
| GABRA1     |
| RGS7       |
| DCLK1      |
| PKN2-AS1   |
| ADAM23     |
| ADCY1      |
| CNTNAP3B   |
| NCALD      |
| MIAT       |
| AC011287.1 |
| AGBL4      |
| DIRAS2     |
| AC120193.1 |
| SH3GL2     |
| GRM5       |
| DGKI       |

|           |
|-----------|
| OPCML     |
| KIAA1549L |
| SLC4A10   |
| PRR16     |
| TOX       |
| SLC8A1    |
| PDE4D     |
| SV2B      |
| CHN1      |
| ITPR1     |
| MAN1A1    |
| DPP10     |
| ANKS1B    |
| RGS4      |
| RAB27B    |
| HS3ST2    |
| NEGR1     |
| LDB2      |
| MTUS2     |
| KALRN     |
| ELAVL4    |
| MPPED1    |
| PCP4      |
| ZBTB18    |
| HPCAL4    |
| CPLX1     |
| LY6H      |
| KLC1      |
| PEG10     |
| CHGA      |
| DIRAS2    |
| BEX4      |
| MTCH1     |
| ARF1      |
| TOLLIP    |
| MTPN      |
| DYNLL1    |
| UBC       |
| GHITM     |
| PGAM1     |
| CREG2     |

|          |
|----------|
| SULT4A1  |
| NAPB     |
| SYP      |
| TSPAN7   |
| LMO4     |
| CEND1    |
| GDI1     |
| NLRP1    |
| GAP43    |
| RNF11    |
| PPIA     |
| SARAF    |
| TAGLN3   |
| TOMM20   |
| TMSB10   |
| STMN3    |
| CKB      |
| BEX3     |
| PRKAR1B  |
| ENO2     |
| CDK5R1   |
| MAP1A    |
| STXBP1   |
| SYT11    |
| FAIM2    |
| STMN1    |
| SYT4     |
| YWHAZ    |
| ATP6V1B2 |
| SERINC1  |
| GABRA1   |
| HSP90AA1 |
| TMSB4X   |
| SLC17A7  |
| PREPL    |
| SPARCL1  |
| RTN3     |
| MAPK1    |
| EIF4A2   |
| BEX1     |
| ARPP19   |

|          |
|----------|
| PHYHIP   |
| PRNP     |
| NDRG4    |
| NEFM     |
| GNAS     |
| PJA2     |
| ACTG1    |
| PEBP1    |
| RAB6B    |
| TUBB2A   |
| YWHAB    |
| THY1     |
| ENC1     |
| UCHL1    |
| YWHAH    |
| PNMA2    |
| NORAD    |
| SCN3B    |
| STMN2    |
| BASP1    |
| CHN1     |
| VSNL1    |
| NEFL     |
| IDS      |
| HSP90AB1 |
| SNAP25   |
| CALM1    |
| YWHAG    |
| PGM2L1   |
| MAP1B    |
| TSPYL1   |
| TUBA1B   |
| NRGN     |
| CALM3    |
| RGS4     |
| RAB3B    |
| MSRA     |
| TEAD1    |
| CACNA1A  |
| SHANK2   |
| CACNA1B  |

|           |
|-----------|
| GALNT18   |
| PDE4D     |
| PARP8     |
| YWHAB     |
| TMTC1     |
| HCN1      |
| STXBP5L   |
| FOCAD     |
| NOS1AP    |
| FAM19A2   |
| DLGAP2    |
| THY1      |
| NUP93     |
| AFF3      |
| CCSER1    |
| PDE1A     |
| TMEM178B  |
| RIMS1     |
| CACNA2D3  |
| ANKRD30BL |
| GRIN2B    |
| LDB2      |
| GRIA3     |
| CREG2     |
| PHACTR1   |
| MAP1B     |
| SYN2      |
| FAM19A1   |
| ANKRD33B  |
| C9orf16   |
| KHDRBS3   |
| MSC-AS1   |
| MEG8      |
| NELL2     |
| SDK1      |
| HS6ST3    |
| DCC       |
| SH3GL2    |
| HPCA      |
| NRP1      |
| AFF2      |

|             |
|-------------|
| AMPH        |
| SCN3B       |
| SV2B        |
| RYR3        |
| UCHL1       |
| KCNN2       |
| CAMK2B      |
| CNTNAP2     |
| GALNT17     |
| EPHA4       |
| SLC24A3     |
| CDH12       |
| RBFOX1      |
| FGFR1       |
| MGAT4C      |
| CHN1        |
| CLSTN2      |
| ENC1        |
| HOPX        |
| LMO4        |
| WIPF3       |
| PTPRG       |
| SLC17A7     |
| NETO1       |
| PRKCG       |
| TRHDE       |
| SNTG2       |
| NEUROD2     |
| CTXND1      |
| ROBO2       |
| NPTXR       |
| IQCJ-SCHIP1 |
| SNAP25      |
| NRIP3       |
| CPNE4       |
| CCBE1       |
| SHISA6      |
| RSPO3       |
| SUSD4       |
| CHRM3       |
| KCNQ5       |

|             |
|-------------|
| OPCML       |
| GRIA1       |
| CFAP299     |
| TSPAN18     |
| CACNG8      |
| CAMK2A      |
| TG          |
| LINC02196   |
| NPIP5       |
| SCARB1      |
| ARL15       |
| ANGPT2      |
| PDZRN3      |
| SLC2A3      |
| PPFIBP1     |
| GALNT18     |
| PLCB4       |
| LHFPL6      |
| MYRIP       |
| SLC39A10    |
| CCNY        |
| DOCK9       |
| PTPRM       |
| ANKS1A      |
| IGF1R       |
| SLC7A1      |
| BSG         |
| ST6GALNAC3  |
| ESYT2       |
| TMSB10      |
| NEAT1       |
| ETS2        |
| PTPRG       |
| CRIM1       |
| SLC16A1     |
| TACC1       |
| TBC1D4      |
| PARVB       |
| GALNT15     |
| ADAMTS9-AS2 |
| B2M         |



|           |
|-----------|
| PLEKHG1   |
| PTPRB     |
| CPNE8     |
| BTNL9     |
| HEG1      |
| ADAMTS9   |
| SLC7A5    |
| WWTR1     |
| MT2A      |
| SVIL      |
| UTRN      |
| RBMS2     |
| ELOVL7    |
| SLC9A3R2  |
| NEDD9     |
| UACA      |
| NXN       |
| FN1       |
| CMTM8     |
| THSD4     |
| SYNE2     |
| JCAD      |
| EGFL7     |
| ITGA6     |
| SLC2A1    |
| ABCB1     |
| HIF1A-AS2 |
| BMP6      |
| PODXL     |
| STOM      |
| MECOM     |
| ITGA1     |
| IGFBP7    |
| PRKCH     |
| RNF144B   |
| A2M       |
| IRAK3     |
| CGNL1     |
| DOCK6     |
| COBLL1    |
| HLA-E     |

|           |
|-----------|
| ARHGAP29  |
| ANO2      |
| FLT1      |
| ATP10A    |
| CLDN5     |
| VWF       |
| EPAS1     |
| ST8SIA6   |
| FLI1      |
| ERG       |
| ENG       |
| EBF1      |
| ADGRL4    |
| SMAD6     |
| LEF1      |
| ABCG2     |
| PECAM1    |
| TGM2      |
| ADGRF5    |
| IFITM3    |
| EMCN      |
| CFH       |
| ITIH5     |
| ZNF366    |
| EMP2      |
| CYYR1     |
| LINC01876 |
| SPAG16    |
| KIAA0825  |
| DYNC2H1   |
| TMEM232   |
| CRB1      |
| CASC15    |
| EFCAB2    |
| CFAP70    |
| CCDC30    |
| CEP126    |
| TSGA10    |
| HYDIN     |
| DNAH6     |
| ULK4      |

|           |
|-----------|
| CFAP221   |
| PACRG     |
| DNAH7     |
| CFAP61    |
| CFAP44    |
| PARD3B    |
| EFCAB6    |
| SPEF2     |
| DNAH9     |
| IQCH      |
| CFAP46    |
| NEK11     |
| KIAA2012  |
| LINC00907 |
| ANKFN1    |
| CCDC146   |
| RFX2      |
| CASC2     |
| NEK5      |
| DCDC1     |
| DNAH12    |
| DNAH5     |
| WDR78     |
| FBXL13    |
| GLIS3     |
| CFAP54    |
| ZBBX      |
| PPIL6     |
| FAM227A   |
| LRRIQ1    |
| TOGARAM2  |
| CASC1     |
| FANK1     |
| CFAP43    |
| RSPH1     |
| DNAAF1    |
| AGBL1     |
| PCAT1     |
| CFAP299   |
| VWA3A     |
| CCDC40    |

|            |
|------------|
| PLCH1      |
| AL022068.1 |
| LINC01088  |
| DNAI1      |
| CAPS       |
| CCDC173    |
| FHAD1      |
| PPP1R42    |
| STK33      |
| LMNTD1     |
| EFHC2      |
| SPATA17    |
| EYA1       |
| LRRC9      |
| CFAP47     |
| RGS22      |
| CFAP52     |
| FRMPD2     |
| WDR49      |
| GMPR       |
| SPAG17     |
| ARMC3      |
| SERPINI2   |
| LINC02055  |
| TEKT1      |
| SPAG6      |
| ARMC4      |
| AC019330.1 |
| CFAP73     |
| TTC6       |
| TTC29      |
| CCDC60     |
| DNAH3      |
| DNAH11     |
| VWA3B      |
| COL8A1     |
| TRDN       |
| AC020718.1 |
| MAP3K19    |
| CFAP157    |
| DTHD1      |

|           |
|-----------|
| ADGB      |
| VWA5B1    |
| FOXJ1     |
| THSD7B    |
| NTNG1     |
| PRELID2   |
| SORCS1    |
| ROBO1     |
| LINC01470 |
| SYNPR     |
| KIAA1217  |
| INPP4B    |
| GPC6      |
| MGAT4C    |
| ASIC2     |
| GRIA4     |
| RELN      |
| RGS12     |
| ADARB2    |
| FGF13     |
| CNTN5     |
| CCK       |
| SST       |
| MACROD2   |
| FRAS1     |
| SEMA6D    |
| ZNF385D   |
| GRIP1     |
| GRIK1     |
| GALNTL6   |
| NXPH1     |
| FSTL5     |
| ERBB4     |
| GAD2      |
| CNR1      |
| KCNC2     |
| UNC5D     |
| DLX6-AS1  |
| SGCZ      |
| PTPRT     |
| GAD1      |

|          |
|----------|
| SLC6A1   |
| KAZN     |
| CNTNAP2  |
| MTUS2    |
| CNTN4    |
| XKR4     |
| CXCL14   |
| ALK      |
| GABRG3   |
| PTCHD4   |
| GRIK2    |
| KIAA1211 |
| IL1RAPL2 |
| VWC2     |
| VSTM2A   |
| THSD7A   |
| PTPRM    |
| ARL4C    |
| ROBO2    |
| ZNF804B  |
| RAB3C    |
| PDZRN3   |
| MYO16    |
| TMEM132D |
| BTBD11   |
| FGF14    |
| RPH3A    |
| SCG2     |
| KCNH7    |
| NHS      |
| RBMS3    |
| TAC1     |
| ELAVL2   |
| FGF12    |
| PLCXD3   |
| PLD5     |
| DNER     |
| PCDH11X  |
| LUZP2    |
| RIMS2    |
| THRB     |

|             |
|-------------|
| SETBP1      |
| KCNIP1      |
| GABRB2      |
| TENM3       |
| ANK1        |
| GNAS        |
| SNRPN       |
| NRXN3       |
| PIP5K1B     |
| PCDH11Y     |
| IGF1        |
| SLC2A13     |
| CHRM3       |
| PAM         |
| GRIN3A      |
| UBASH3B     |
| SLC44A5     |
| PWRN1       |
| ADAMTS9-AS2 |
| NAP1L3      |
| GABRA1      |
| PPFIA2      |
| ADRA1A      |
| ALDH1A2     |
| ADGRL2      |
| SEMA5A      |
| ST6GALNAC5  |
| TLL1        |
| KCNIP4      |
| THOC3       |
| GRM1        |
| SLIT3       |
| PPM1E       |
| PLXNA4      |
| DGKB        |
| C8orf34     |
| LY86-AS1    |
| CNGB1       |
| SAMD3       |
| ERC2        |
| KCTD16      |

|            |
|------------|
| UNC13C     |
| AC090568.2 |
| TIAM1      |
| ZMAT4      |
| SYN3       |
| RFX3       |
| CCDC85A    |
| EPHA7      |
| LINC01322  |
| TARID      |
| SHISA9     |
| BASP1-AS1  |
| CSMD3      |
| DAB1       |
| CNKSR2     |
| MCTP1      |
| CACNA1C    |
| AC097487.1 |
| SPON1      |
| ZFPM2      |
| SEZ6L      |
| TRPM3      |
| DIAPH2     |
| CDH8       |
| PTPRO      |
| KIAA1211L  |
| GNAL       |
| NBEA       |
| CDH9       |
| CSMD1      |
| AC138305.1 |
| LARGE1     |
| CLSTN2     |
| DLGAP1     |
| BTBD9      |
| CA10       |
| SLC35F3    |
| CACNA1E    |
| CHSY3      |
| NELL2      |
| DAPK1      |



|            |
|------------|
| PARD3      |
| SYNPR      |
| AC106795.3 |
| LRRC7      |
| BDNF       |
| ZNF804A    |
| CDH13      |
| KCNJ6      |
| RYR2       |
| KCNJ3      |
| LINGO2     |
| KALRN      |
| ANO3       |
| GRM7       |
| SYNE1      |
| RBFOX3     |
| PTCHD1-AS  |
| INPP4B     |
| FAM19A2    |
| GABRB3     |
| LRRTM4     |
| GRIN2A     |
| FAM19A1    |
| CADPS      |
| CBLN2      |
| CAMK1D     |
| TMEM108    |
| MKL2       |
| CEP112     |
| TENM2      |
| UPP2       |
| COL26A1    |
| DLGAP2     |
| LRFN5      |
| FAM155A    |
| JPH1       |
| SPHKAP     |
| KCNK1      |
| PROX1      |
| BCL11B     |
| GALNT17    |

|            |
|------------|
| GRID2      |
| SPP1       |
| SRGAP2C    |
| SYNDIG1    |
| MGAT4A     |
| DOCK8      |
| ARHGAP24   |
| LRMDA      |
| ARHGAP15   |
| APBB1IP    |
| TBXAS1     |
| FYB1       |
| AC074327.1 |
| PLXDC2     |
| ST6GAL1    |
| RUNX1      |
| ADAM28     |
| AC068992.1 |
| INPP5D     |
| HS3ST4     |
| ITPR2      |
| DOCK2      |
| SLCO2B1    |
| P2RY12     |
| CD74       |
| AOAH       |
| MSR1       |
| SRGAP2     |
| SFMBT2     |
| CSF1R      |
| SRGAP2B    |
| PTPRC      |
| LHFPL2     |
| SLC1A3     |
| APOE       |
| BMP2K      |
| MEF2A      |
| FOXP2      |
| SYK        |
| PALD1      |
| ATP8B4     |

|            |
|------------|
| RBM47      |
| FOXN3      |
| LINC02232  |
| C3         |
| ANKRD44    |
| CPED1      |
| LPCAT2     |
| FLI1       |
| IKZF1      |
| AC244021.1 |
| CSGALNACT1 |
| ABCC4      |
| BNC2       |
| BLNK       |
| LY86       |
| RHBDF2     |
| ZFHX3      |
| ARHGAP22   |
| LYN        |
| CHST11     |
| IPCEF1     |
| MEF2C      |
| ETV6       |
| C1QB       |
| CCND3      |
| MERTK      |
| DISC1      |
| FKBP5      |
| RASGEF1C   |
| EPB41L2    |
| LDLRAD4    |
| MAML3      |
| SLC9A9     |
| SORL1      |
| PIK3R5     |
| FMN1       |
| MYO1F      |
| CYFIP1     |
| SP100      |
| AKAP13     |
| CCDC26     |

|           |
|-----------|
| ARHGAP25  |
| RCSD1     |
| FGD4      |
| LRRK1     |
| TGFBR1    |
| RIN3      |
| ZFP36L1   |
| CSF2RA    |
| ZFP36L2   |
| ALOX5     |
| DLEU7-AS1 |
| SKAP2     |
| CD86      |
| TGFBR2    |
| WDFY4     |
| KCNQ1     |
| CX3CR1    |
| C1QC      |
| SEMA3C    |
| PROX1     |
| HSP90AA1  |
| STMN1     |
| LMO4      |
| CCK       |
| TUBA1B    |
| TMSB4X    |
| VXN       |
| HSP90AB1  |
| NRIP3     |
| ACTG1     |
| CFL1      |
| STMN2     |
| PEBP1     |
| SARAF     |
| ATP1B1    |
| CACNG8    |
| UBB       |
| UCHL1     |
| UHMK1     |
| YWHAG     |
| NORAD     |

|          |
|----------|
| SCOC     |
| CAMK2N1  |
| RAB6B    |
| SELENOW  |
| SNAP25   |
| YWHAB    |
| ARF1     |
| ATP6V1B2 |
| YWHAZ    |
| DYNLL1   |
| PGRMC1   |
| TMEM59L  |
| MAPK1    |
| NEUROD2  |
| CHN1     |
| PLEKHB2  |
| SUB1     |
| IDS      |
| NSG2     |
| MAP1B    |
| PGAM1    |
| UBE2S    |
| GNG2     |
| ATP6V0E2 |
| SCN3B    |
| NAPB     |
| MTPN     |
| PEA15    |
| TSPYL1   |
| EEF1A2   |
| BASP1    |
| SLC17A7  |
| NEFL     |
| TUBB2A   |
| TPI1     |
| NEFM     |
| DKK3     |
| TOMM20   |
| PNMA2    |
| CALM1    |
| OLFM1    |

|            |
|------------|
| CALM3      |
| PWAR6      |
| CAMK2B     |
| NRGN       |
| BEX4       |
| LY6H       |
| YWHAH      |
| NPTXR      |
| CPLX2      |
| THY1       |
| CAMK2A     |
| PHYHIP     |
| NNAT       |
| PCSK1N     |
| PGM2L1     |
| HOPX       |
| CREG2      |
| CCDC85B    |
| NCDN       |
| BEX3       |
| BHLHE22    |
| C9orf16    |
| HPCAL4     |
| ENC1       |
| BEX2       |
| MMD        |
| BEX1       |
| TSPAN7     |
| CNIH2      |
| SYT13      |
| HPCA       |
| NPTX1      |
| CHGB       |
| LY6E       |
| NRN1       |
| CD24       |
| RNF219-AS1 |
| DPP10      |
| ADGRV1     |
| GPC5       |
| PITPNC1    |

|            |
|------------|
| SLC1A2     |
| GLIS3      |
| AC002429.2 |
| RFX4       |
| HIF3A      |
| AC073941.1 |
| ADCY2      |
| GFAP       |
| PRKG1      |
| LINC01088  |
| AQP4-AS1   |
| RANBP3L    |
| AQP4       |
| FAM189A2   |
| ZNRF3      |
| BMPR1B     |
| ATP1A2     |
| CTNNA2     |
| SLC14A1    |
| NEAT1      |
| MIR4300HG  |
| SORBS1     |
| RYR3       |
| RORA       |
| MSI2       |
| SLC4A4     |
| ARHGEF4    |
| NPAS3      |
| GRAMD2B    |
| KCNN3      |
| TNC        |
| DTNA       |
| NEBL       |
| AC027117.2 |
| WDR49      |
| SFXN5      |
| ALDH1A1    |
| MAPK4      |
| FMN2       |
| PARD3B     |
| ITPKB      |

|            |
|------------|
| NHSL1      |
| TRPM3      |
| STON2      |
| LINC01748  |
| SLC25A18   |
| SOX5       |
| CTNND2     |
| GLI3       |
| CD44       |
| SLC1A3     |
| PREX2      |
| LRIG1      |
| NTM        |
| NTRK2      |
| PRDM16     |
| DCLK2      |
| LINC00299  |
| GPM6A      |
| PAMR1      |
| CDH20      |
| ADGRA3     |
| ATP13A4    |
| GJA1       |
| CARMIL1    |
| GPR75-ASB3 |
| ACOT11     |
| RGS20      |
| MIR99AHG   |
| ABLIM1     |
| LMNTD1     |
| FUT9       |
| PDE7B      |
| ITGB4      |
| ARHGEF26   |
| CAMK2G     |
| AQP1       |
| RPS6KA2    |
| SLC7A11    |
| CSGALNACT1 |
| LINC00499  |
| DOCK7      |



|            |
|------------|
| IQCA1      |
| ACSBG1     |
| RGMA       |
| CACHD1     |
| MACF1      |
| MGAT4C     |
| ACACB      |
| FARP1      |
| AC091826.2 |
| NPL        |
| 3-Mar      |
| WWC1       |
| PARD3      |
| CTNNA3     |
| PLP1       |
| ST18       |
| RNF220     |
| PIP4K2A    |
| TMEM144    |
| MOBP       |
| MAN2A1     |
| MBP        |
| TMTC2      |
| SLC44A1    |
| PDE1C      |
| TF         |
| ENPP2      |
| C10orf90   |
| AC026316.5 |
| PHLPP1     |
| LINC01608  |
| DOCK5      |
| PRUNE2     |
| CNP        |
| CLMN       |
| FRMD5      |
| KCNH8      |
| UGT8       |
| CREB5      |
| PCSK6      |
| IL1RAPL1   |

|           |
|-----------|
| SCD       |
| TMEM165   |
| QKI       |
| PLEKHH1   |
| GAB1      |
| HDAC2-AS2 |
| CLDND1    |
| FRYL      |
| NCKAP5    |
| PDE4B     |
| FRMD4B    |
| TTLL7     |
| HHIP      |
| SLCO1A2   |
| ELMO1     |
| SLC5A11   |
| SHROOM4   |
| PIEZO2    |
| CNTN2     |
| FAM107B   |
| PDE8A     |
| MOG       |
| ERBIN     |
| LPAR1     |
| ANLN      |
| PXK       |
| FA2H      |
| ARAP2     |
| SLAIN1    |
| VRK2      |
| COL4A5    |
| BCAS1     |
| SLC24A2   |
| LINC01170 |
| ABCA8     |
| ZNF536    |
| QDPR      |
| LINC00639 |
| LAMP2     |
| KIF6      |
| SHTN1     |

|            |
|------------|
| GRM3       |
| AMER2      |
| CERCAM     |
| CNDP1      |
| SELENOP    |
| CDK18      |
| POLR2F     |
| SIK3       |
| 7-Sep      |
| PLCL1      |
| FOLH1      |
| DAAM2      |
| FUT8       |
| HIP1       |
| CD22       |
| 1-Mar      |
| LINC00320  |
| CNTNAP4    |
| UNC5C      |
| LINC00609  |
| MYRF       |
| FGFR2      |
| PALM2      |
| MIR181A1HG |
| RFTN2      |
| SPOCK3     |
| HIPK2      |
| MAG        |
| ERMN       |
| ABCA2      |
| DLG1       |
| SGCZ       |
| LHFPL3     |
| VCAN       |
| PTPRZ1     |
| TNR        |
| SOX6       |
| SMOC1      |
| DSCAM      |
| AC004852.2 |
| PCDH15     |

|            |
|------------|
| LUZP2      |
| MEGF11     |
| SLC35F1    |
| TMEM132C   |
| LRRC4C     |
| PDZD2      |
| XYLT1      |
| NXPH1      |
| BRINP3     |
| MMP16      |
| COL11A1    |
| KCND2      |
| AL445250.1 |
| CHST11     |
| EPN2       |
| MIR3681HG  |
| LINC00511  |
| OPHN1      |
| GRIK1      |
| NOVA1      |
| CA10       |
| ZEB1       |
| ADAMTS17   |
| POU6F2     |
| STK32A     |
| KAT2B      |
| ALK        |
| LINC02588  |
| TMEM132D   |
| KCNIP1     |
| RAB31      |
| BCAN       |
| AL589740.1 |
| PDZRN4     |
| ZNF462     |
| MYT1       |
| SOX5       |
| CCDC50     |
| PID1       |
| UST        |
| ATRNL1     |

|          |
|----------|
| MDGA2    |
| TOX      |
| KIF13A   |
| ABHD2    |
| KIF26B   |
| SAMD4A   |
| CHL1     |
| LRRN1    |
| NRCAM    |
| SORCS1   |
| ZDHHC14  |
| PLPP4    |
| GRID2    |
| COL9A1   |
| CALCRL   |
| FERMT1   |
| ATP13A4  |
| SCN1A    |
| LRRTM4   |
| SULF2    |
| NAV1     |
| CACNG4   |
| GPC6     |
| ITGA8    |
| DPP6     |
| ARHGAP31 |
| GALNT13  |
| PRRX1    |
| FGF14    |
| NTNG1    |
| OPCML    |
| SCN9A    |
| PDE7B    |
| HIF3A    |
| CRISPLD2 |
| OLIG1    |
| KLHL1    |
| DISC1    |
| RORA     |
| SCD5     |
| ASAP1    |

|           |
|-----------|
| LRRTM3    |
| DGKG      |
| AMZ1      |
| LRRK2     |
| IL1RAP    |
| SORCS3    |
| OLIG2     |
| PDGFRA    |
| CASC15    |
| USP53     |
| ZEB1      |
| GFAP      |
| SLC20A2   |
| CRIM1     |
| SLC30A10  |
| PDLIM5    |
| APOD      |
| RORA      |
| CEMIP     |
| DLC1      |
| MCAM      |
| PRKG1     |
| COLEC12   |
| ADAMTS9   |
| PDE3A     |
| LHFPL6    |
| COL18A1   |
| S100A6    |
| SYNPO2    |
| PDE7B     |
| CRISPLD2  |
| COL4A2    |
| LINC01088 |
| ARHGAP10  |
| GRK5      |
| SLC38A11  |
| ABCA9     |
| HSPB1     |
| PDZRN3    |
| LPP       |
| COL4A1    |

|             |
|-------------|
| RGS5        |
| RBMS3       |
| C11orf96    |
| ZFHX3       |
| ARHGAP42    |
| HBA2        |
| NEAT1       |
| CALD1       |
| PLCE1       |
| RBMS1       |
| MYO1B       |
| GJC1        |
| CDH6        |
| MYH11       |
| SYNE2       |
| LAMA2       |
| PLCB4       |
| SNTB1       |
| ATP1A2      |
| ZIC1        |
| EPS8        |
| TNS1        |
| UTRN        |
| FLNA        |
| RNF152      |
| LMOD1       |
| TIMP3       |
| LINC02147   |
| NR2F2-AS1   |
| UACA        |
| LAMA4       |
| EPAS1       |
| ADAMTS9-AS2 |
| AC012409.2  |
| SVIL        |
| TAGLN       |
| ARHGAP29    |
| FBLN1       |
| PTH1R       |
| VIM         |
| ADIRF       |

|            |
|------------|
| PDGFRB     |
| ACTA2      |
| SLC6A12    |
| NDUFA4L2   |
| COBLL1     |
| PRELP      |
| RIPOR3     |
| ADGRD1     |
| IGFBP7     |
| KANK2      |
| RBPMS      |
| NID1       |
| DCN        |
| NOTCH3     |
| BGN        |
| EBF1       |
| MYL9       |
| ITIH5      |
| AC092957.1 |
| CARMN      |
| TBX18      |
| CFH        |
| COL1A2     |
