# Supplementary material
Source: PubMed Central journal article supplement (PMC9343414)
Supplement: 41422_2022_678_MOESM22_ESM.pdf [file 41422_2022_678_MOESM22_ESM.pdf]

**Supplementary information**

**TableS8. Differentially expressed genes between human Astrocyte and NSC**

|  | p_val    | avg_log2FC | pct.1 | pct.2 | p_val_adj  | cluster   |
|--|----------|------------|-------|-------|------------|-----------|
|  | 1.41E-07 | 0.4965639  | 0.236 | 0.136 | 0.00397731 | Astrocyte |
|  | 1.40E-07 | 0.39761212 | 0.309 | 0.203 | 0.0039661  | Astrocyte |
|  | 1.37E-07 | 0.40866826 | 0.174 | 0.082 | 0.0038917  | Astrocyte |
|  | 1.16E-07 | 0.1288617  | 0.297 | 0.487 | 0.00328238 | Astrocyte |
|  | 1.07E-07 | 0.36622784 | 0.198 | 0.101 | 0.00302275 | Astrocyte |
|  | 1.05E-07 | 0.77826716 | 0.335 | 0.244 | 0.00296546 | Astrocyte |
|  | 1.03E-07 | 0.57063702 | 0.242 | 0.14  | 0.00291215 | Astrocyte |
|  | 8.20E-08 | 0.39904029 | 0.826 | 0.83  | 0.00232141 | Astrocyte |
|  | 7.12E-08 | 0.36052486 | 0.147 | 0.058 | 0.00201641 | Astrocyte |
|  | 6.80E-08 | 0.74566413 | 0.638 | 0.644 | 0.0019255  | Astrocyte |
|  | 6.79E-08 | 0.48012066 | 0.273 | 0.164 | 0.00192105 | Astrocyte |
|  | 6.32E-08 | 0.62734114 | 0.725 | 0.754 | 0.00178794 | Astrocyte |
|  | 6.17E-08 | 0.5981297  | 0.647 | 0.591 | 0.00174524 | Astrocyte |
|  | 5.12E-08 | 0.65262166 | 0.548 | 0.506 | 0.00144803 | Astrocyte |
|  | 4.38E-08 | 0.39476301 | 0.319 | 0.201 | 0.00124014 | Astrocyte |
|  | 4.33E-08 | 0.48475917 | 0.411 | 0.304 | 0.00122559 | Astrocyte |
|  | 3.13E-08 | 0.54104519 | 0.735 | 0.785 | 0.00088657 | Astrocyte |
|  | 2.87E-08 | 0.25480511 | 0.157 | 0.062 | 0.00081286 | Astrocyte |
|  | 2.63E-08 | 0.37208101 | 0.92  | 0.979 | 0.00074364 | Astrocyte |
|  | 2.54E-08 | 0.53341007 | 0.64  | 0.662 | 0.00072035 | Astrocyte |
|  | 2.49E-08 | 0.30768925 | 0.101 | 0.024 | 0.00070503 | Astrocyte |
|  | 1.94E-08 | 0.71949514 | 0.242 | 0.14  | 0.00055036 | Astrocyte |
|  | 1.80E-08 | 0.60881991 | 0.466 | 0.379 | 0.00051061 | Astrocyte |
|  | 1.79E-08 | 0.37194175 | 0.931 | 0.983 | 0.00050584 | Astrocyte |
|  | 1.50E-08 | 0.52883805 | 0.468 | 0.358 | 0.00042495 | Astrocyte |
|  | 1.26E-08 | 0.29054374 | 0.958 | 0.987 | 0.00035589 | Astrocyte |
|  | 8.06E-09 | 0.46293879 | 0.769 | 0.836 | 0.00022806 | Astrocyte |
|  | 7.95E-09 | 0.33137757 | 0.152 | 0.056 | 0.00022489 | Astrocyte |
|  | 7.36E-09 | 0.33968793 | 0.121 | 0.034 | 0.00020836 | Astrocyte |
|  | 5.83E-09 | 0.7683687  | 0.597 | 0.563 | 0.00016504 | Astrocyte |
|  | 4.50E-09 | 0.46268626 | 0.221 | 0.112 | 0.00012749 | Astrocyte |
|  | 4.06E-09 | 0.28486303 | 0.114 | 0.028 | 0.00011494 | Astrocyte |
|  | 3.85E-09 | 0.50172276 | 0.205 | 0.097 | 0.00010888 | Astrocyte |
|  | 2.99E-09 | 0.3046701  | 0.198 | 0.086 | 8.46E-05   | Astrocyte |
|  | 2.58E-09 | 0.59145699 | 0.532 | 0.455 | 7.29E-05   | Astrocyte |
|  | 1.62E-09 | 0.59602713 | 0.359 | 0.228 | 4.57E-05   | Astrocyte |
|  | 1.61E-09 | 0.79412729 | 0.596 | 0.554 | 4.57E-05   | Astrocyte |
|  | 1.25E-09 | 0.35679741 | 0.12  | 0.03  | 3.53E-05   | Astrocyte |

|  |          |            |       |       |          |           |
|--|----------|------------|-------|-------|----------|-----------|
|  | 1.03E-09 | 0.4335226  | 0.766 | 0.662 | 2.92E-05 | Astrocyte |
|  | 6.13E-10 | 0.48967899 | 0.156 | 0.052 | 1.73E-05 | Astrocyte |
|  | 5.95E-10 | 0.5442247  | 0.663 | 0.675 | 1.69E-05 | Astrocyte |
|  | 4.43E-10 | 0.31408788 | 0.147 | 0.045 | 1.25E-05 | Astrocyte |
|  | 4.26E-10 | 1.08186117 | 0.44  | 0.341 | 1.20E-05 | Astrocyte |
|  | 4.10E-10 | 1.08360876 | 0.302 | 0.187 | 1.16E-05 | Astrocyte |
|  | 3.87E-10 | 0.28754982 | 0.179 | 0.067 | 1.09E-05 | Astrocyte |
|  | 3.67E-10 | 0.31118008 | 0.124 | 0.03  | 1.04E-05 | Astrocyte |
|  | 3.13E-10 | 0.60346644 | 0.347 | 0.222 | 8.85E-06 | Astrocyte |
|  | 3.11E-10 | 0.58190721 | 0.738 | 0.694 | 8.79E-06 | Astrocyte |
|  | 2.99E-10 | 0.66358906 | 0.381 | 0.259 | 8.46E-06 | Astrocyte |
|  | 2.77E-10 | 0.84277088 | 0.568 | 0.532 | 7.83E-06 | Astrocyte |
|  | 2.02E-10 | 0.37972609 | 0.909 | 0.951 | 5.71E-06 | Astrocyte |
|  | 1.48E-10 | 0.60365021 | 0.358 | 0.224 | 4.20E-06 | Astrocyte |
|  | 1.03E-10 | 0.40399674 | 0.136 | 0.034 | 2.93E-06 | Astrocyte |
|  | 6.40E-11 | 0.53067706 | 0.264 | 0.134 | 1.81E-06 | Astrocyte |
|  | 5.73E-11 | 0.47731151 | 0.344 | 0.211 | 1.62E-06 | Astrocyte |
|  | 5.59E-11 | 0.66835108 | 0.28  | 0.147 | 1.58E-06 | Astrocyte |
|  | 5.08E-11 | 0.22591721 | 0.981 | 0.998 | 1.44E-06 | Astrocyte |
|  | 3.17E-11 | 0.50634302 | 0.709 | 0.651 | 8.98E-07 | Astrocyte |
|  | 2.91E-11 | 0.57795397 | 0.356 | 0.222 | 8.25E-07 | Astrocyte |
|  | 1.98E-11 | 0.6676456  | 0.478 | 0.353 | 5.59E-07 | Astrocyte |
|  | 1.58E-11 | 0.41495072 | 0.898 | 0.944 | 4.46E-07 | Astrocyte |
|  | 1.53E-11 | 0.75423395 | 0.442 | 0.312 | 4.34E-07 | Astrocyte |
|  | 1.40E-11 | 0.61906108 | 0.49  | 0.364 | 3.98E-07 | Astrocyte |
|  | 1.25E-11 | 0.92517841 | 0.173 | 0.05  | 3.53E-07 | Astrocyte |
|  | 9.03E-12 | 0.45980379 | 0.151 | 0.039 | 2.56E-07 | Astrocyte |
|  | 8.51E-12 | 0.47681329 | 0.798 | 0.826 | 2.41E-07 | Astrocyte |
|  | 6.22E-12 | 0.36342326 | 0.931 | 0.968 | 1.76E-07 | Astrocyte |
|  | 4.83E-12 | 1.44058274 | 0.315 | 0.183 | 1.37E-07 | Astrocyte |
|  | 4.15E-12 | 0.34809198 | 0.118 | 0.017 | 1.18E-07 | Astrocyte |
|  | 2.70E-12 | 0.29761492 | 0.966 | 1     | 7.63E-08 | Astrocyte |
|  | 2.69E-12 | 0.54776175 | 0.264 | 0.125 | 7.61E-08 | Astrocyte |
|  | 2.23E-12 | 0.32200168 | 0.11  | 0.011 | 6.30E-08 | Astrocyte |
|  | 1.16E-12 | 0.70832475 | 0.618 | 0.567 | 3.28E-08 | Astrocyte |
|  | 9.42E-13 | 0.75428923 | 0.367 | 0.226 | 2.67E-08 | Astrocyte |
|  | 8.68E-13 | 0.51343296 | 0.14  | 0.028 | 2.46E-08 | Astrocyte |
|  | 6.96E-13 | 0.59353095 | 0.274 | 0.125 | 1.97E-08 | Astrocyte |
|  | 6.85E-13 | 0.68907555 | 0.415 | 0.285 | 1.94E-08 | Astrocyte |
|  | 3.27E-13 | 0.77961931 | 0.984 | 1     | 9.25E-09 | Astrocyte |
|  | 2.07E-13 | 0.72640151 | 0.595 | 0.511 | 5.87E-09 | Astrocyte |

|  |          |            |       |       |          |           |
|--|----------|------------|-------|-------|----------|-----------|
|  | 1.82E-13 | 0.74765374 | 0.431 | 0.3   | 5.16E-09 | Astrocyte |
|  | 1.25E-13 | 0.8835274  | 0.466 | 0.347 | 3.53E-09 | Astrocyte |
|  | 1.09E-13 | 0.67669077 | 0.635 | 0.506 | 3.08E-09 | Astrocyte |
|  | 8.24E-14 | 0.42680417 | 0.933 | 0.985 | 2.33E-09 | Astrocyte |
|  | 5.62E-14 | 0.63043238 | 0.491 | 0.34  | 1.59E-09 | Astrocyte |
|  | 5.04E-14 | 0.56781151 | 0.789 | 0.81  | 1.43E-09 | Astrocyte |
|  | 4.99E-14 | 0.58227207 | 0.754 | 0.748 | 1.41E-09 | Astrocyte |
|  | 4.97E-14 | 0.58233334 | 0.161 | 0.035 | 1.41E-09 | Astrocyte |
|  | 3.52E-14 | 0.68644047 | 0.619 | 0.506 | 9.98E-10 | Astrocyte |
|  | 2.92E-14 | 0.82140309 | 0.47  | 0.328 | 8.28E-10 | Astrocyte |
|  | 1.37E-14 | 0.66688945 | 0.31  | 0.151 | 3.89E-10 | Astrocyte |
|  | 9.41E-15 | 0.62751876 | 0.696 | 0.72  | 2.66E-10 | Astrocyte |
|  | 5.57E-15 | 0.92166324 | 0.265 | 0.112 | 1.58E-10 | Astrocyte |
|  | 4.57E-15 | 0.64133682 | 0.365 | 0.203 | 1.29E-10 | Astrocyte |
|  | 3.38E-15 | 0.37987079 | 0.148 | 0.021 | 9.57E-11 | Astrocyte |
|  | 2.32E-15 | 0.67716805 | 0.619 | 0.539 | 6.55E-11 | Astrocyte |
|  | 1.88E-15 | 0.87031293 | 0.36  | 0.194 | 5.33E-11 | Astrocyte |
|  | 1.81E-15 | 0.60210719 | 0.33  | 0.155 | 5.12E-11 | Astrocyte |
|  | 1.52E-15 | 0.97032287 | 0.257 | 0.099 | 4.30E-11 | Astrocyte |
|  | 1.44E-15 | 0.64550813 | 0.632 | 0.515 | 4.07E-11 | Astrocyte |
|  | 1.40E-15 | 0.7361709  | 0.345 | 0.17  | 3.96E-11 | Astrocyte |
|  | 4.28E-16 | 1.18223347 | 0.559 | 0.459 | 1.21E-11 | Astrocyte |
|  | 3.87E-16 | 0.68921445 | 0.183 | 0.039 | 1.10E-11 | Astrocyte |
|  | 2.29E-16 | 0.79508326 | 0.79  | 0.785 | 6.47E-12 | Astrocyte |
|  | 1.82E-16 | 0.7251317  | 0.469 | 0.299 | 5.15E-12 | Astrocyte |
|  | 1.66E-16 | 0.58660609 | 0.211 | 0.056 | 4.69E-12 | Astrocyte |
|  | 1.39E-16 | 0.57536056 | 0.146 | 0.015 | 3.94E-12 | Astrocyte |
|  | 9.43E-17 | 0.69981094 | 0.204 | 0.05  | 2.67E-12 | Astrocyte |
|  | 8.09E-17 | 0.44313825 | 0.177 | 0.03  | 2.29E-12 | Astrocyte |
|  | 4.21E-17 | 0.37465721 | 0.977 | 0.998 | 1.19E-12 | Astrocyte |
|  | 1.93E-17 | 0.59166567 | 0.282 | 0.104 | 5.47E-13 | Astrocyte |
|  | 1.79E-17 | 0.61987382 | 0.239 | 0.071 | 5.06E-13 | Astrocyte |
|  | 1.30E-17 | 0.79316922 | 0.541 | 0.409 | 3.67E-13 | Astrocyte |
|  | 1.97E-18 | 0.72798142 | 0.523 | 0.332 | 5.58E-14 | Astrocyte |
|  | 1.87E-18 | 0.62015333 | 0.822 | 0.825 | 5.30E-14 | Astrocyte |
|  | 1.13E-18 | 0.47052356 | 0.918 | 0.972 | 3.19E-14 | Astrocyte |
|  | 4.98E-19 | 0.9073925  | 0.6   | 0.444 | 1.41E-14 | Astrocyte |
|  | 4.86E-19 | 0.74482206 | 0.394 | 0.205 | 1.38E-14 | Astrocyte |
|  | 1.81E-19 | 0.68592782 | 0.252 | 0.075 | 5.13E-15 | Astrocyte |
|  | 1.52E-19 | 0.59493477 | 0.226 | 0.05  | 4.30E-15 | Astrocyte |
|  | 6.12E-20 | 0.91761689 | 0.717 | 0.683 | 1.73E-15 | Astrocyte |

|  |          |            |       |       |          |           |
|--|----------|------------|-------|-------|----------|-----------|
|  | 5.29E-20 | 0.69376131 | 0.18  | 0.021 | 1.50E-15 | Astrocyte |
|  | 1.65E-20 | 1.06509672 | 0.931 | 0.955 | 4.66E-16 | Astrocyte |
|  | 1.37E-20 | 0.81703617 | 0.535 | 0.306 | 3.89E-16 | Astrocyte |
|  | 3.62E-21 | 0.73928175 | 0.265 | 0.067 | 1.02E-16 | Astrocyte |
|  | 1.02E-21 | 0.99302878 | 0.57  | 0.412 | 2.88E-17 | Astrocyte |
|  | 1.23E-22 | 0.63535032 | 0.223 | 0.037 | 3.47E-18 | Astrocyte |
|  | 1.81E-23 | 0.61954768 | 0.867 | 0.888 | 5.12E-19 | Astrocyte |
|  | 1.04E-23 | 1.07636606 | 0.351 | 0.132 | 2.94E-19 | Astrocyte |
|  | 1.03E-23 | 1.11198583 | 0.752 | 0.685 | 2.91E-19 | Astrocyte |
|  | 9.51E-24 | 0.76096151 | 0.777 | 0.715 | 2.69E-19 | Astrocyte |
|  | 2.67E-25 | 0.96363602 | 0.386 | 0.151 | 7.56E-21 | Astrocyte |
|  | 1.23E-25 | 0.82572903 | 0.345 | 0.116 | 3.47E-21 | Astrocyte |
|  | 1.74E-26 | 0.68835106 | 0.839 | 0.853 | 4.94E-22 | Astrocyte |
|  | 1.78E-27 | 1.4091198  | 0.438 | 0.203 | 5.05E-23 | Astrocyte |
|  | 1.64E-28 | 1.0740101  | 0.31  | 0.076 | 4.65E-24 | Astrocyte |
|  | 1.08E-28 | 0.91932211 | 0.508 | 0.257 | 3.04E-24 | Astrocyte |
|  | 8.08E-30 | 0.96980076 | 0.807 | 0.718 | 2.29E-25 | Astrocyte |
|  | 2.75E-31 | 0.97688557 | 0.291 | 0.047 | 7.78E-27 | Astrocyte |
|  | 9.97E-32 | 1.47423363 | 0.606 | 0.401 | 2.82E-27 | Astrocyte |
|  | 9.92E-32 | 1.16921944 | 0.677 | 0.524 | 2.81E-27 | Astrocyte |
|  | 4.30E-32 | 0.55388673 | 0.989 | 0.972 | 1.22E-27 | Astrocyte |
|  | 1.75E-32 | 1.01634996 | 0.448 | 0.181 | 4.96E-28 | Astrocyte |
|  | 5.29E-33 | 1.41397545 | 0.941 | 0.912 | 1.50E-28 | Astrocyte |
|  | 3.03E-33 | 1.37340358 | 0.326 | 0.069 | 8.57E-29 | Astrocyte |
|  | 1.81E-33 | 0.98455095 | 0.324 | 0.062 | 5.12E-29 | Astrocyte |
|  | 1.63E-33 | 0.96009075 | 0.76  | 0.683 | 4.62E-29 | Astrocyte |
|  | 1.43E-33 | 0.99421533 | 0.445 | 0.174 | 4.05E-29 | Astrocyte |
|  | 5.08E-36 | 1.27453331 | 0.541 | 0.293 | 1.44E-31 | Astrocyte |
|  | 7.58E-37 | 1.25202765 | 0.627 | 0.364 | 2.14E-32 | Astrocyte |
|  | 2.24E-39 | 1.34207699 | 0.629 | 0.405 | 6.35E-35 | Astrocyte |
|  | 4.51E-43 | 1.1668999  | 0.94  | 0.912 | 1.28E-38 | Astrocyte |
|  | 2.62E-46 | 1.27385555 | 0.503 | 0.157 | 7.40E-42 | Astrocyte |
|  | 1.58E-46 | 1.60183065 | 0.653 | 0.343 | 4.48E-42 | Astrocyte |
|  | 1.75E-49 | 1.33155181 | 0.724 | 0.418 | 4.94E-45 | Astrocyte |
|  | 3.99E-50 | 1.22589844 | 0.859 | 0.709 | 1.13E-45 | Astrocyte |
|  | 1.41E-50 | 1.28075159 | 0.807 | 0.623 | 4.00E-46 | Astrocyte |
|  | 1.18E-55 | 2.01149245 | 0.695 | 0.375 | 3.35E-51 | Astrocyte |
|  | 3.47E-62 | 1.70313242 | 0.742 | 0.44  | 9.81E-58 | Astrocyte |
|  | 5.33E-64 | 1.58596185 | 0.583 | 0.177 | 1.51E-59 | Astrocyte |
|  | 3.39E-76 | 1.93122261 | 0.623 | 0.151 | 9.59E-72 | Astrocyte |
|  | 6.90E-79 | 1.72828008 | 0.526 | 0.043 | 1.95E-74 | Astrocyte |

|  |           |            |       |       |            |           |
|--|-----------|------------|-------|-------|------------|-----------|
|  | 4.99E-79  | 1.91342459 | 0.604 | 0.125 | 1.41E-74   | Astrocyte |
|  | 9.59E-105 | 2.02487099 | 0.899 | 0.575 | 2.71E-100  | Astrocyte |
|  | 1.17E-07  | 0.23651256 | 0.231 | 0.125 | 0.00330752 | NSC       |
|  | 5.26E-08  | 0.22625696 | 0.907 | 0.709 | 0.00148774 | NSC       |
|  | 3.26E-08  | 0.27703386 | 0.8   | 0.624 | 0.00092384 | NSC       |
|  | 3.12E-08  | 0.23136221 | 0.634 | 0.46  | 0.00088212 | NSC       |
|  | 1.46E-08  | 0.23628783 | 0.897 | 0.733 | 0.00041346 | NSC       |
|  | 5.95E-09  | 0.25438335 | 0.879 | 0.693 | 0.00016833 | NSC       |
|  | 3.51E-09  | 0.24104668 | 0.819 | 0.598 | 9.93E-05   | NSC       |
|  | 2.81E-09  | 0.22113988 | 0.759 | 0.571 | 7.95E-05   | NSC       |
|  | 2.43E-09  | 0.35056733 | 0.229 | 0.116 | 6.89E-05   | NSC       |
|  | 2.32E-09  | 0.2647446  | 0.862 | 0.647 | 6.58E-05   | NSC       |
|  | 2.30E-09  | 0.25227576 | 0.703 | 0.505 | 6.50E-05   | NSC       |
|  | 1.19E-09  | 0.26399543 | 0.325 | 0.179 | 3.38E-05   | NSC       |
|  | 1.03E-09  | 0.28897418 | 0.153 | 0.059 | 2.90E-05   | NSC       |
|  | 7.47E-10  | 0.22743477 | 0.761 | 0.548 | 2.11E-05   | NSC       |
|  | 6.70E-10  | 0.22330151 | 0.491 | 0.315 | 1.90E-05   | NSC       |
|  | 5.83E-10  | 0.23258608 | 0.59  | 0.393 | 1.65E-05   | NSC       |
|  | 3.44E-10  | 0.23295307 | 0.916 | 0.727 | 9.73E-06   | NSC       |
|  | 3.35E-10  | 0.23552181 | 0.75  | 0.527 | 9.49E-06   | NSC       |
|  | 2.45E-10  | 0.25106914 | 0.231 | 0.108 | 6.94E-06   | NSC       |
|  | 2.13E-10  | 0.23946017 | 0.354 | 0.198 | 6.04E-06   | NSC       |
|  | 1.45E-10  | 0.22963608 | 0.91  | 0.732 | 4.10E-06   | NSC       |
|  | 1.30E-10  | 0.23855833 | 0.972 | 0.843 | 3.68E-06   | NSC       |
|  | 1.25E-10  | 0.23075021 | 0.761 | 0.514 | 3.53E-06   | NSC       |
|  | 1.20E-10  | 0.24572819 | 0.513 | 0.323 | 3.41E-06   | NSC       |
|  | 9.97E-11  | 0.23097803 | 0.869 | 0.638 | 2.82E-06   | NSC       |
|  | 9.68E-11  | 0.25059968 | 0.94  | 0.761 | 2.74E-06   | NSC       |
|  | 8.24E-11  | 0.22746396 | 0.864 | 0.615 | 2.33E-06   | NSC       |
|  | 7.93E-11  | 0.24001018 | 0.937 | 0.775 | 2.24E-06   | NSC       |
|  | 7.48E-11  | 0.24851265 | 0.813 | 0.592 | 2.12E-06   | NSC       |
|  | 6.51E-11  | 0.59668372 | 0.252 | 0.123 | 1.84E-06   | NSC       |
|  | 6.20E-11  | 0.28468706 | 0.528 | 0.338 | 1.76E-06   | NSC       |
|  | 5.65E-11  | 0.26166231 | 0.659 | 0.446 | 1.60E-06   | NSC       |
|  | 3.50E-11  | 0.33594091 | 0.293 | 0.149 | 9.91E-07   | NSC       |
|  | 2.66E-11  | 0.22096725 | 0.209 | 0.088 | 7.52E-07   | NSC       |
|  | 2.45E-11  | 0.23016191 | 0.985 | 0.862 | 6.92E-07   | NSC       |
|  | 2.25E-11  | 0.25013914 | 0.944 | 0.772 | 6.35E-07   | NSC       |
|  | 1.94E-11  | 0.22497935 | 0.784 | 0.549 | 5.48E-07   | NSC       |
|  | 1.29E-11  | 0.2309688  | 0.791 | 0.566 | 3.65E-07   | NSC       |
|  | 1.21E-11  | 0.25025287 | 0.91  | 0.701 | 3.41E-07   | NSC       |

|  |          |            |       |       |          |     |
|--|----------|------------|-------|-------|----------|-----|
|  | 1.10E-11 | 0.26925504 | 0.789 | 0.563 | 3.11E-07 | NSC |
|  | 1.05E-11 | 0.28536704 | 0.925 | 0.724 | 2.97E-07 | NSC |
|  | 8.08E-12 | 0.22905438 | 0.851 | 0.606 | 2.29E-07 | NSC |
|  | 6.41E-12 | 0.30742625 | 0.409 | 0.227 | 1.81E-07 | NSC |
|  | 5.46E-12 | 0.29625215 | 0.771 | 0.552 | 1.54E-07 | NSC |
|  | 4.86E-12 | 0.2357793  | 0.965 | 0.804 | 1.38E-07 | NSC |
|  | 4.81E-12 | 0.2832146  | 0.951 | 0.827 | 1.36E-07 | NSC |
|  | 4.41E-12 | 0.24521712 | 0.881 | 0.642 | 1.25E-07 | NSC |
|  | 4.38E-12 | 0.2271132  | 0.769 | 0.518 | 1.24E-07 | NSC |
|  | 4.20E-12 | 0.28394678 | 0.545 | 0.341 | 1.19E-07 | NSC |
|  | 4.14E-12 | 0.23211452 | 0.716 | 0.484 | 1.17E-07 | NSC |
|  | 3.86E-12 | 0.24284955 | 0.174 | 0.062 | 1.09E-07 | NSC |
|  | 3.84E-12 | 0.29372868 | 0.422 | 0.234 | 1.09E-07 | NSC |
|  | 3.79E-12 | 0.23778946 | 0.289 | 0.137 | 1.07E-07 | NSC |
|  | 3.38E-12 | 0.23548735 | 0.785 | 0.554 | 9.56E-08 | NSC |
|  | 2.41E-12 | 0.24799013 | 0.991 | 0.909 | 6.83E-08 | NSC |
|  | 2.19E-12 | 0.26456666 | 0.804 | 0.567 | 6.20E-08 | NSC |
|  | 2.06E-12 | 0.45395271 | 0.328 | 0.171 | 5.83E-08 | NSC |
|  | 2.03E-12 | 0.23579177 | 0.994 | 0.943 | 5.75E-08 | NSC |
|  | 1.84E-12 | 0.23739557 | 0.729 | 0.481 | 5.20E-08 | NSC |
|  | 1.46E-12 | 0.41876074 | 0.192 | 0.073 | 4.13E-08 | NSC |
|  | 1.39E-12 | 0.26962783 | 0.554 | 0.341 | 3.94E-08 | NSC |
|  | 1.22E-12 | 0.23203917 | 0.619 | 0.388 | 3.45E-08 | NSC |
|  | 1.03E-12 | 0.28587959 | 0.692 | 0.452 | 2.90E-08 | NSC |
|  | 9.93E-13 | 0.2252117  | 0.728 | 0.48  | 2.81E-08 | NSC |
|  | 8.78E-13 | 0.24424567 | 0.603 | 0.379 | 2.49E-08 | NSC |
|  | 7.65E-13 | 0.3121705  | 0.569 | 0.35  | 2.16E-08 | NSC |
|  | 7.53E-13 | 0.28741516 | 0.965 | 0.829 | 2.13E-08 | NSC |
|  | 7.41E-13 | 0.22097294 | 0.662 | 0.413 | 2.10E-08 | NSC |
|  | 7.12E-13 | 0.28504878 | 0.78  | 0.552 | 2.01E-08 | NSC |
|  | 6.71E-13 | 0.22977588 | 0.438 | 0.243 | 1.90E-08 | NSC |
|  | 6.18E-13 | 0.22253822 | 0.563 | 0.341 | 1.75E-08 | NSC |
|  | 5.89E-13 | 0.24628661 | 0.838 | 0.598 | 1.67E-08 | NSC |
|  | 5.07E-13 | 0.25394652 | 0.759 | 0.515 | 1.44E-08 | NSC |
|  | 4.46E-13 | 0.24700329 | 0.688 | 0.45  | 1.26E-08 | NSC |
|  | 3.80E-13 | 0.25882808 | 0.791 | 0.54  | 1.08E-08 | NSC |
|  | 3.64E-13 | 0.40507059 | 0.707 | 0.486 | 1.03E-08 | NSC |
|  | 3.46E-13 | 0.25473824 | 0.787 | 0.533 | 9.79E-09 | NSC |
|  | 3.37E-13 | 0.27264325 | 0.892 | 0.696 | 9.53E-09 | NSC |
|  | 3.04E-13 | 0.24682298 | 0.778 | 0.522 | 8.61E-09 | NSC |
|  | 2.53E-13 | 0.27304805 | 0.993 | 0.924 | 7.15E-09 | NSC |

|  |          |            |       |       |          |     |
|--|----------|------------|-------|-------|----------|-----|
|  | 2.13E-13 | 0.25724554 | 0.825 | 0.563 | 6.02E-09 | NSC |
|  | 2.12E-13 | 0.29708336 | 0.951 | 0.761 | 5.99E-09 | NSC |
|  | 1.94E-13 | 0.24944009 | 0.789 | 0.552 | 5.49E-09 | NSC |
|  | 1.86E-13 | 0.31613416 | 0.985 | 0.863 | 5.27E-09 | NSC |
|  | 1.85E-13 | 0.30214966 | 0.59  | 0.38  | 5.23E-09 | NSC |
|  | 1.65E-13 | 0.23225034 | 0.235 | 0.095 | 4.66E-09 | NSC |
|  | 1.60E-13 | 0.37782895 | 0.455 | 0.26  | 4.53E-09 | NSC |
|  | 1.47E-13 | 0.24443925 | 0.218 | 0.085 | 4.15E-09 | NSC |
|  | 1.22E-13 | 0.33423269 | 0.547 | 0.333 | 3.47E-09 | NSC |
|  | 1.18E-13 | 0.30605037 | 0.94  | 0.743 | 3.34E-09 | NSC |
|  | 1.18E-13 | 0.34003138 | 0.888 | 0.654 | 3.34E-09 | NSC |
|  | 1.07E-13 | 0.1497727  | 0.116 | 0.025 | 3.03E-09 | NSC |
|  | 9.93E-14 | 0.38560926 | 0.897 | 0.696 | 2.81E-09 | NSC |
|  | 8.99E-14 | 0.27879942 | 0.901 | 0.704 | 2.54E-09 | NSC |
|  | 8.23E-14 | 0.27914005 | 0.759 | 0.51  | 2.33E-09 | NSC |
|  | 7.45E-14 | 0.27057472 | 0.849 | 0.614 | 2.11E-09 | NSC |
|  | 7.38E-14 | 0.3020293  | 0.847 | 0.603 | 2.09E-09 | NSC |
|  | 7.14E-14 | 0.24527752 | 0.78  | 0.528 | 2.02E-09 | NSC |
|  | 6.03E-14 | 0.29035572 | 0.793 | 0.568 | 1.71E-09 | NSC |
|  | 5.90E-14 | 0.25839767 | 0.468 | 0.261 | 1.67E-09 | NSC |
|  | 5.47E-14 | 0.22208613 | 0.44  | 0.233 | 1.55E-09 | NSC |
|  | 4.75E-14 | 0.24979295 | 0.858 | 0.606 | 1.34E-09 | NSC |
|  | 4.50E-14 | 0.29077343 | 0.828 | 0.609 | 1.27E-09 | NSC |
|  | 4.47E-14 | 0.2296584  | 0.517 | 0.299 | 1.26E-09 | NSC |
|  | 4.13E-14 | 0.29549974 | 0.731 | 0.489 | 1.17E-09 | NSC |
|  | 3.24E-14 | 0.22706275 | 0.703 | 0.44  | 9.17E-10 | NSC |
|  | 3.19E-14 | 0.27124869 | 0.578 | 0.346 | 9.04E-10 | NSC |
|  | 2.63E-14 | 0.24494191 | 0.825 | 0.562 | 7.45E-10 | NSC |
|  | 2.62E-14 | 0.25052741 | 0.222 | 0.083 | 7.43E-10 | NSC |
|  | 2.56E-14 | 0.25151954 | 0.75  | 0.512 | 7.25E-10 | NSC |
|  | 2.10E-14 | 0.28725413 | 0.843 | 0.606 | 5.96E-10 | NSC |
|  | 2.06E-14 | 0.27894979 | 0.782 | 0.53  | 5.84E-10 | NSC |
|  | 2.05E-14 | 0.30812676 | 0.931 | 0.748 | 5.82E-10 | NSC |
|  | 2.01E-14 | 0.29038181 | 0.978 | 0.856 | 5.70E-10 | NSC |
|  | 1.84E-14 | 0.29592584 | 0.955 | 0.769 | 5.21E-10 | NSC |
|  | 1.65E-14 | 0.24442762 | 0.724 | 0.459 | 4.67E-10 | NSC |
|  | 1.65E-14 | 0.2245952  | 0.25  | 0.101 | 4.66E-10 | NSC |
|  | 1.43E-14 | 0.2509136  | 0.705 | 0.464 | 4.04E-10 | NSC |
|  | 1.39E-14 | 0.24364427 | 0.351 | 0.167 | 3.92E-10 | NSC |
|  | 1.32E-14 | 0.27722931 | 0.558 | 0.323 | 3.73E-10 | NSC |
|  | 1.04E-14 | 0.23765299 | 0.696 | 0.43  | 2.95E-10 | NSC |

|  |          |            |       |       |          |     |
|--|----------|------------|-------|-------|----------|-----|
|  | 1.03E-14 | 0.22632673 | 0.588 | 0.347 | 2.91E-10 | NSC |
|  | 1.01E-14 | 0.27828323 | 0.233 | 0.089 | 2.85E-10 | NSC |
|  | 8.86E-15 | 0.26275809 | 0.826 | 0.571 | 2.51E-10 | NSC |
|  | 8.35E-15 | 0.30859165 | 0.896 | 0.666 | 2.36E-10 | NSC |
|  | 7.15E-15 | 0.30065396 | 0.866 | 0.614 | 2.02E-10 | NSC |
|  | 6.94E-15 | 0.32738221 | 0.933 | 0.721 | 1.97E-10 | NSC |
|  | 6.94E-15 | 0.28428054 | 0.674 | 0.421 | 1.96E-10 | NSC |
|  | 5.90E-15 | 0.32116344 | 0.966 | 0.839 | 1.67E-10 | NSC |
|  | 5.60E-15 | 0.25470996 | 0.657 | 0.411 | 1.58E-10 | NSC |
|  | 5.14E-15 | 0.22313516 | 0.431 | 0.222 | 1.45E-10 | NSC |
|  | 4.95E-15 | 0.22675812 | 0.575 | 0.334 | 1.40E-10 | NSC |
|  | 4.68E-15 | 0.22899782 | 0.653 | 0.391 | 1.33E-10 | NSC |
|  | 4.46E-15 | 0.22266938 | 0.364 | 0.177 | 1.26E-10 | NSC |
|  | 4.34E-15 | 0.42319976 | 0.718 | 0.508 | 1.23E-10 | NSC |
|  | 3.99E-15 | 0.29015561 | 0.207 | 0.071 | 1.13E-10 | NSC |
|  | 3.91E-15 | 0.21323248 | 0.687 | 0.417 | 1.11E-10 | NSC |
|  | 3.85E-15 | 0.33880596 | 0.683 | 0.444 | 1.09E-10 | NSC |
|  | 3.61E-15 | 0.32705067 | 0.886 | 0.689 | 1.02E-10 | NSC |
|  | 3.42E-15 | 0.36460724 | 0.832 | 0.594 | 9.67E-11 | NSC |
|  | 2.63E-15 | 0.42916191 | 0.916 | 0.763 | 7.44E-11 | NSC |
|  | 2.54E-15 | 0.31160717 | 0.903 | 0.644 | 7.18E-11 | NSC |
|  | 2.46E-15 | 0.3080444  | 0.955 | 0.797 | 6.96E-11 | NSC |
|  | 2.32E-15 | 0.33199787 | 0.944 | 0.768 | 6.56E-11 | NSC |
|  | 2.17E-15 | 0.31067296 | 0.625 | 0.384 | 6.13E-11 | NSC |
|  | 2.16E-15 | 0.34367014 | 0.351 | 0.163 | 6.12E-11 | NSC |
|  | 2.13E-15 | 0.3468026  | 0.856 | 0.621 | 6.04E-11 | NSC |
|  | 2.09E-15 | 0.28658599 | 0.356 | 0.173 | 5.90E-11 | NSC |
|  | 2.08E-15 | 0.36074052 | 0.599 | 0.365 | 5.88E-11 | NSC |
|  | 1.84E-15 | 0.27666242 | 0.517 | 0.287 | 5.22E-11 | NSC |
|  | 1.80E-15 | 0.50618769 | 0.41  | 0.214 | 5.09E-11 | NSC |
|  | 1.75E-15 | 0.3213826  | 0.916 | 0.679 | 4.96E-11 | NSC |
|  | 1.61E-15 | 0.32619121 | 0.907 | 0.672 | 4.57E-11 | NSC |
|  | 1.56E-15 | 0.23340391 | 0.418 | 0.208 | 4.42E-11 | NSC |
|  | 1.51E-15 | 0.33516517 | 0.866 | 0.627 | 4.28E-11 | NSC |
|  | 1.19E-15 | 0.30426541 | 0.789 | 0.53  | 3.36E-11 | NSC |
|  | 1.07E-15 | 0.28457171 | 0.711 | 0.453 | 3.03E-11 | NSC |
|  | 1.05E-15 | 0.23781173 | 0.409 | 0.201 | 2.96E-11 | NSC |
|  | 9.86E-16 | 0.40025627 | 0.653 | 0.404 | 2.79E-11 | NSC |
|  | 9.44E-16 | 0.22296271 | 0.368 | 0.172 | 2.67E-11 | NSC |
|  | 9.43E-16 | 0.29946251 | 0.817 | 0.559 | 2.67E-11 | NSC |
|  | 8.58E-16 | 0.23118504 | 0.515 | 0.281 | 2.43E-11 | NSC |



|  |          |            |       |       |          |     |
|--|----------|------------|-------|-------|----------|-----|
|  | 8.23E-16 | 0.39754966 | 0.929 | 0.82  | 2.33E-11 | NSC |
|  | 4.34E-16 | 0.23183832 | 0.535 | 0.299 | 1.23E-11 | NSC |
|  | 3.45E-16 | 0.32429515 | 0.569 | 0.336 | 9.78E-12 | NSC |
|  | 3.43E-16 | 0.33939776 | 0.563 | 0.333 | 9.72E-12 | NSC |
|  | 3.34E-16 | 0.28090645 | 0.576 | 0.328 | 9.45E-12 | NSC |
|  | 2.90E-16 | 0.30174451 | 0.494 | 0.27  | 8.20E-12 | NSC |
|  | 2.80E-16 | 0.22618374 | 0.597 | 0.353 | 7.91E-12 | NSC |
|  | 2.72E-16 | 0.24106906 | 0.826 | 0.547 | 7.69E-12 | NSC |
|  | 2.65E-16 | 0.32924521 | 0.797 | 0.532 | 7.51E-12 | NSC |
|  | 2.42E-16 | 0.36293615 | 0.909 | 0.659 | 6.84E-12 | NSC |
|  | 2.39E-16 | 0.22990238 | 0.356 | 0.164 | 6.76E-12 | NSC |
|  | 2.27E-16 | 0.32654339 | 0.774 | 0.526 | 6.43E-12 | NSC |
|  | 1.92E-16 | 0.26255578 | 0.787 | 0.49  | 5.44E-12 | NSC |
|  | 1.91E-16 | 0.3596171  | 0.668 | 0.421 | 5.40E-12 | NSC |
|  | 1.74E-16 | 0.34980721 | 0.144 | 0.031 | 4.93E-12 | NSC |
|  | 1.66E-16 | 0.34506261 | 0.957 | 0.802 | 4.69E-12 | NSC |
|  | 1.62E-16 | 0.25057514 | 0.58  | 0.328 | 4.59E-12 | NSC |
|  | 1.53E-16 | 0.22321904 | 0.662 | 0.383 | 4.34E-12 | NSC |
|  | 1.48E-16 | 0.3677652  | 0.918 | 0.724 | 4.19E-12 | NSC |
|  | 1.44E-16 | 0.33176493 | 0.942 | 0.747 | 4.09E-12 | NSC |
|  | 1.36E-16 | 0.29252871 | 0.649 | 0.404 | 3.86E-12 | NSC |
|  | 1.21E-16 | 0.22704707 | 0.364 | 0.169 | 3.42E-12 | NSC |
|  | 1.07E-16 | 0.32127277 | 0.976 | 0.89  | 3.03E-12 | NSC |
|  | 1.02E-16 | 0.38573441 | 0.825 | 0.576 | 2.87E-12 | NSC |
|  | 1.00E-16 | 0.29765152 | 0.84  | 0.576 | 2.84E-12 | NSC |
|  | 6.97E-17 | 0.31517081 | 0.89  | 0.627 | 1.97E-12 | NSC |
|  | 5.20E-17 | 0.27321949 | 0.517 | 0.281 | 1.47E-12 | NSC |
|  | 4.86E-17 | 0.26420746 | 0.664 | 0.387 | 1.38E-12 | NSC |
|  | 4.41E-17 | 0.22848446 | 0.338 | 0.148 | 1.25E-12 | NSC |
|  | 4.32E-17 | 0.2494953  | 0.502 | 0.26  | 1.22E-12 | NSC |
|  | 3.15E-17 | 0.28826273 | 0.899 | 0.675 | 8.93E-13 | NSC |
|  | 2.40E-17 | 0.30673349 | 0.603 | 0.352 | 6.79E-13 | NSC |
|  | 1.22E-17 | 0.25021489 | 0.459 | 0.227 | 3.46E-13 | NSC |
|  | 1.16E-17 | 0.22554648 | 0.575 | 0.315 | 3.29E-13 | NSC |
|  | 1.12E-17 | 0.25029384 | 0.595 | 0.328 | 3.17E-13 | NSC |
|  | 1.05E-17 | 0.41639576 | 0.392 | 0.195 | 2.98E-13 | NSC |
|  | 1.05E-17 | 0.27165468 | 0.582 | 0.317 | 2.97E-13 | NSC |
|  | 9.59E-18 | 0.27633091 | 0.58  | 0.319 | 2.71E-13 | NSC |
|  | 8.51E-18 | 0.33984088 | 0.959 | 0.801 | 2.41E-13 | NSC |
|  | 8.47E-18 | 0.34463511 | 0.933 | 0.707 | 2.40E-13 | NSC |
|  | 8.39E-18 | 0.23440585 | 0.142 | 0.028 | 2.38E-13 | NSC |

|  |          |            |       |       |          |     |
|--|----------|------------|-------|-------|----------|-----|
|  | 6.44E-18 | 0.3194447  | 0.425 | 0.205 | 1.82E-13 | NSC |
|  | 4.17E-18 | 0.33368348 | 0.864 | 0.602 | 1.18E-13 | NSC |
|  | 3.76E-18 | 0.35385809 | 0.685 | 0.422 | 1.06E-13 | NSC |
|  | 3.43E-18 | 0.27045754 | 0.534 | 0.278 | 9.70E-14 | NSC |
|  | 2.69E-18 | 0.28455105 | 0.996 | 0.955 | 7.62E-14 | NSC |
|  | 1.81E-18 | 0.27669148 | 0.341 | 0.146 | 5.14E-14 | NSC |
|  | 1.72E-18 | 0.23948419 | 0.229 | 0.073 | 4.88E-14 | NSC |
|  | 1.70E-18 | 0.25880345 | 0.267 | 0.094 | 4.82E-14 | NSC |
|  | 1.65E-18 | 0.24707586 | 0.496 | 0.25  | 4.66E-14 | NSC |
|  | 1.61E-18 | 0.28346406 | 0.853 | 0.581 | 4.56E-14 | NSC |
|  | 1.60E-18 | 0.5105564  | 0.845 | 0.619 | 4.53E-14 | NSC |
|  | 1.18E-18 | 0.31140308 | 0.851 | 0.588 | 3.33E-14 | NSC |
|  | 9.49E-19 | 0.42146733 | 0.868 | 0.646 | 2.69E-14 | NSC |
|  | 8.81E-19 | 0.23914735 | 0.584 | 0.319 | 2.49E-14 | NSC |
|  | 8.05E-19 | 0.34732646 | 0.925 | 0.688 | 2.28E-14 | NSC |
|  | 7.87E-19 | 0.2704603  | 0.787 | 0.496 | 2.23E-14 | NSC |
|  | 7.10E-19 | 0.34315872 | 0.879 | 0.613 | 2.01E-14 | NSC |
|  | 6.73E-19 | 0.33515294 | 0.748 | 0.476 | 1.91E-14 | NSC |
|  | 6.24E-19 | 0.32693579 | 0.937 | 0.703 | 1.77E-14 | NSC |
|  | 5.56E-19 | 0.30626208 | 0.147 | 0.028 | 1.57E-14 | NSC |
|  | 4.43E-19 | 0.26272356 | 0.535 | 0.277 | 1.25E-14 | NSC |
|  | 4.20E-19 | 0.33895185 | 0.271 | 0.096 | 1.19E-14 | NSC |
|  | 3.80E-19 | 0.64750285 | 0.341 | 0.149 | 1.08E-14 | NSC |
|  | 3.58E-19 | 0.28454624 | 0.604 | 0.336 | 1.01E-14 | NSC |
|  | 3.54E-19 | 0.28054624 | 0.597 | 0.334 | 1.00E-14 | NSC |
|  | 3.38E-19 | 0.37645639 | 0.744 | 0.471 | 9.56E-15 | NSC |
|  | 3.17E-19 | 0.33304143 | 0.836 | 0.548 | 8.99E-15 | NSC |
|  | 2.93E-19 | 0.39549614 | 0.957 | 0.806 | 8.30E-15 | NSC |
|  | 2.85E-19 | 0.38652164 | 0.92  | 0.713 | 8.06E-15 | NSC |
|  | 2.84E-19 | 0.32381762 | 0.978 | 0.874 | 8.05E-15 | NSC |
|  | 2.57E-19 | 0.32486543 | 0.558 | 0.298 | 7.28E-15 | NSC |
|  | 2.46E-19 | 0.47492239 | 0.929 | 0.779 | 6.97E-15 | NSC |
|  | 2.39E-19 | 0.30830798 | 0.66  | 0.378 | 6.77E-15 | NSC |
|  | 2.03E-19 | 0.27865485 | 0.668 | 0.38  | 5.75E-15 | NSC |
|  | 1.62E-19 | 0.44535105 | 0.828 | 0.577 | 4.57E-15 | NSC |
|  | 1.57E-19 | 0.24753483 | 0.282 | 0.1   | 4.45E-15 | NSC |
|  | 1.55E-19 | 0.33455927 | 0.711 | 0.421 | 4.39E-15 | NSC |
|  | 9.28E-20 | 0.29651222 | 0.621 | 0.344 | 2.63E-15 | NSC |
|  | 6.90E-20 | 0.38142615 | 0.978 | 0.804 | 1.95E-15 | NSC |
|  | 5.89E-20 | 0.31067749 | 0.377 | 0.164 | 1.67E-15 | NSC |
|  | 4.69E-20 | 0.32238038 | 0.996 | 0.958 | 1.33E-15 | NSC |

|  |          |            |       |       |          |     |
|--|----------|------------|-------|-------|----------|-----|
|  | 4.13E-20 | 0.44322921 | 0.289 | 0.108 | 1.17E-15 | NSC |
|  | 4.07E-20 | 0.23096612 | 0.64  | 0.342 | 1.15E-15 | NSC |
|  | 3.96E-20 | 0.39153721 | 0.965 | 0.843 | 1.12E-15 | NSC |
|  | 3.42E-20 | 0.53328782 | 0.789 | 0.523 | 9.67E-16 | NSC |
|  | 3.29E-20 | 0.35210632 | 0.562 | 0.295 | 9.31E-16 | NSC |
|  | 3.25E-20 | 0.32857331 | 0.625 | 0.351 | 9.19E-16 | NSC |
|  | 2.99E-20 | 0.34182806 | 0.888 | 0.626 | 8.47E-16 | NSC |
|  | 2.84E-20 | 0.33125333 | 0.265 | 0.088 | 8.04E-16 | NSC |
|  | 2.75E-20 | 0.33519515 | 0.774 | 0.501 | 7.77E-16 | NSC |
|  | 2.68E-20 | 0.23085339 | 0.504 | 0.246 | 7.60E-16 | NSC |
|  | 1.90E-20 | 0.3434671  | 0.744 | 0.455 | 5.39E-16 | NSC |
|  | 1.47E-20 | 0.40191465 | 0.922 | 0.666 | 4.16E-16 | NSC |
|  | 1.26E-20 | 0.2721679  | 0.418 | 0.187 | 3.57E-16 | NSC |
|  | 1.22E-20 | 0.36307842 | 0.989 | 0.857 | 3.46E-16 | NSC |
|  | 8.88E-21 | 0.35487397 | 0.951 | 0.775 | 2.51E-16 | NSC |
|  | 8.15E-21 | 0.3524736  | 0.556 | 0.29  | 2.31E-16 | NSC |
|  | 8.11E-21 | 0.36760571 | 0.614 | 0.338 | 2.30E-16 | NSC |
|  | 8.06E-21 | 0.29956441 | 0.313 | 0.116 | 2.28E-16 | NSC |
|  | 7.00E-21 | 0.33525477 | 0.965 | 0.748 | 1.98E-16 | NSC |
|  | 5.34E-21 | 0.35185426 | 1     | 0.989 | 1.51E-16 | NSC |
|  | 4.91E-21 | 0.31661732 | 0.58  | 0.305 | 1.39E-16 | NSC |
|  | 3.41E-21 | 0.24630982 | 0.269 | 0.087 | 9.64E-17 | NSC |
|  | 3.35E-21 | 0.29715342 | 0.698 | 0.386 | 9.49E-17 | NSC |
|  | 3.34E-21 | 0.32479218 | 0.325 | 0.119 | 9.45E-17 | NSC |
|  | 2.70E-21 | 0.27951963 | 0.149 | 0.024 | 7.63E-17 | NSC |
|  | 2.65E-21 | 0.41451055 | 0.836 | 0.56  | 7.50E-17 | NSC |
|  | 2.25E-21 | 0.35328474 | 0.981 | 0.862 | 6.38E-17 | NSC |
|  | 2.19E-21 | 0.40261615 | 0.381 | 0.162 | 6.19E-17 | NSC |
|  | 1.84E-21 | 0.23990829 | 0.33  | 0.122 | 5.20E-17 | NSC |
|  | 1.59E-21 | 0.28288373 | 0.271 | 0.088 | 4.49E-17 | NSC |
|  | 1.49E-21 | 0.24015672 | 0.306 | 0.105 | 4.23E-17 | NSC |
|  | 8.93E-22 | 0.41600801 | 0.854 | 0.608 | 2.53E-17 | NSC |
|  | 6.99E-22 | 0.4087624  | 0.976 | 0.824 | 1.98E-17 | NSC |
|  | 6.79E-22 | 0.25760068 | 0.382 | 0.155 | 1.92E-17 | NSC |
|  | 6.41E-22 | 0.34074452 | 0.547 | 0.28  | 1.81E-17 | NSC |
|  | 5.58E-22 | 0.39066744 | 0.989 | 0.891 | 1.58E-17 | NSC |
|  | 4.82E-22 | 0.332088   | 0.567 | 0.287 | 1.36E-17 | NSC |
|  | 4.28E-22 | 0.2410815  | 0.616 | 0.319 | 1.21E-17 | NSC |
|  | 4.23E-22 | 0.34174374 | 0.994 | 0.921 | 1.20E-17 | NSC |
|  | 4.12E-22 | 0.43194741 | 0.388 | 0.16  | 1.16E-17 | NSC |
|  | 3.73E-22 | 0.30466775 | 0.183 | 0.038 | 1.06E-17 | NSC |

|  |          |            |       |       |          |     |
|--|----------|------------|-------|-------|----------|-----|
|  | 3.33E-22 | 0.40767749 | 0.881 | 0.605 | 9.42E-18 | NSC |
|  | 3.22E-22 | 0.33911877 | 0.571 | 0.296 | 9.12E-18 | NSC |
|  | 2.43E-22 | 0.2920165  | 0.733 | 0.419 | 6.88E-18 | NSC |
|  | 2.33E-22 | 0.28835765 | 0.638 | 0.36  | 6.58E-18 | NSC |
|  | 2.11E-22 | 0.4636033  | 0.806 | 0.507 | 5.98E-18 | NSC |
|  | 2.06E-22 | 0.27590206 | 0.483 | 0.227 | 5.82E-18 | NSC |
|  | 1.76E-22 | 0.2413977  | 0.313 | 0.108 | 4.98E-18 | NSC |
|  | 1.52E-22 | 0.31314753 | 0.646 | 0.344 | 4.30E-18 | NSC |
|  | 1.48E-22 | 0.39022092 | 0.356 | 0.135 | 4.18E-18 | NSC |
|  | 1.41E-22 | 0.33870948 | 0.674 | 0.368 | 4.00E-18 | NSC |
|  | 1.05E-22 | 0.35022174 | 0.211 | 0.05  | 2.96E-18 | NSC |
|  | 7.88E-23 | 0.43701342 | 0.927 | 0.687 | 2.23E-18 | NSC |
|  | 6.75E-23 | 0.33364753 | 0.754 | 0.452 | 1.91E-18 | NSC |
|  | 6.38E-23 | 0.32307056 | 0.3   | 0.102 | 1.81E-18 | NSC |
|  | 4.08E-23 | 0.41496427 | 0.785 | 0.492 | 1.16E-18 | NSC |
|  | 3.70E-23 | 0.35272312 | 0.168 | 0.029 | 1.05E-18 | NSC |
|  | 3.20E-23 | 0.26084672 | 0.744 | 0.429 | 9.06E-19 | NSC |
|  | 3.01E-23 | 0.3741218  | 0.715 | 0.408 | 8.53E-19 | NSC |
|  | 2.94E-23 | 0.37199388 | 0.729 | 0.416 | 8.32E-19 | NSC |
|  | 2.70E-23 | 0.58845347 | 0.407 | 0.179 | 7.63E-19 | NSC |
|  | 2.28E-23 | 0.30662262 | 0.524 | 0.249 | 6.46E-19 | NSC |
|  | 2.10E-23 | 0.30283011 | 0.493 | 0.228 | 5.94E-19 | NSC |
|  | 1.76E-23 | 0.30330504 | 0.565 | 0.281 | 4.97E-19 | NSC |
|  | 1.56E-23 | 0.42188721 | 0.922 | 0.722 | 4.41E-19 | NSC |
|  | 1.53E-23 | 0.3999621  | 0.871 | 0.591 | 4.33E-19 | NSC |
|  | 1.07E-23 | 0.41073878 | 0.709 | 0.409 | 3.02E-19 | NSC |
|  | 8.23E-24 | 0.48949493 | 0.371 | 0.142 | 2.33E-19 | NSC |
|  | 4.68E-24 | 0.45316902 | 0.593 | 0.32  | 1.32E-19 | NSC |
|  | 3.74E-24 | 0.38535433 | 0.782 | 0.481 | 1.06E-19 | NSC |
|  | 3.73E-24 | 0.47662237 | 0.882 | 0.628 | 1.06E-19 | NSC |
|  | 3.72E-24 | 0.37929052 | 0.718 | 0.429 | 1.05E-19 | NSC |
|  | 3.59E-24 | 0.3581336  | 0.989 | 0.881 | 1.01E-19 | NSC |
|  | 3.22E-24 | 0.49710554 | 0.854 | 0.6   | 9.11E-20 | NSC |
|  | 2.44E-24 | 0.35314044 | 0.698 | 0.394 | 6.90E-20 | NSC |
|  | 1.20E-24 | 0.28157965 | 0.16  | 0.022 | 3.40E-20 | NSC |
|  | 1.12E-24 | 0.43282207 | 0.815 | 0.521 | 3.18E-20 | NSC |
|  | 8.07E-25 | 0.41030091 | 0.623 | 0.321 | 2.29E-20 | NSC |
|  | 6.68E-25 | 0.2469836  | 0.209 | 0.043 | 1.89E-20 | NSC |
|  | 6.61E-25 | 0.56152728 | 0.922 | 0.698 | 1.87E-20 | NSC |
|  | 6.16E-25 | 0.42245799 | 0.849 | 0.582 | 1.74E-20 | NSC |
|  | 3.87E-25 | 0.38578201 | 0.507 | 0.235 | 1.10E-20 | NSC |

|  |          |            |       |       |          |     |
|--|----------|------------|-------|-------|----------|-----|
|  | 3.71E-25 | 0.49208317 | 0.769 | 0.468 | 1.05E-20 | NSC |
|  | 3.29E-25 | 0.45601393 | 0.399 | 0.157 | 9.32E-21 | NSC |
|  | 3.17E-25 | 0.43430633 | 0.856 | 0.572 | 8.96E-21 | NSC |
|  | 3.15E-25 | 0.57080065 | 0.647 | 0.353 | 8.92E-21 | NSC |
|  | 2.39E-25 | 0.42580108 | 0.386 | 0.148 | 6.77E-21 | NSC |
|  | 2.26E-25 | 0.29796363 | 0.313 | 0.1   | 6.39E-21 | NSC |
|  | 1.89E-25 | 0.44072601 | 0.84  | 0.517 | 5.35E-21 | NSC |
|  | 1.56E-25 | 0.44088034 | 0.881 | 0.596 | 4.43E-21 | NSC |
|  | 1.21E-25 | 0.52384761 | 0.282 | 0.084 | 3.43E-21 | NSC |
|  | 1.16E-25 | 0.25040367 | 0.321 | 0.101 | 3.29E-21 | NSC |
|  | 1.15E-25 | 0.41089457 | 0.612 | 0.317 | 3.26E-21 | NSC |
|  | 1.05E-25 | 0.49908859 | 0.927 | 0.722 | 2.98E-21 | NSC |
|  | 9.37E-26 | 0.30187839 | 0.293 | 0.087 | 2.65E-21 | NSC |
|  | 4.81E-26 | 0.34064217 | 0.694 | 0.384 | 1.36E-21 | NSC |
|  | 4.53E-26 | 0.31488408 | 0.55  | 0.252 | 1.28E-21 | NSC |
|  | 3.73E-26 | 0.39832717 | 0.368 | 0.128 | 1.06E-21 | NSC |
|  | 3.10E-26 | 0.71131732 | 0.524 | 0.258 | 8.76E-22 | NSC |
|  | 1.10E-26 | 0.41896405 | 0.996 | 0.928 | 3.11E-22 | NSC |
|  | 9.97E-27 | 0.33963231 | 0.338 | 0.115 | 2.82E-22 | NSC |
|  | 9.43E-27 | 0.38060097 | 0.606 | 0.302 | 2.67E-22 | NSC |
|  | 7.02E-27 | 0.33813943 | 0.571 | 0.264 | 1.99E-22 | NSC |
|  | 2.74E-27 | 0.42969156 | 0.972 | 0.825 | 7.77E-23 | NSC |
|  | 2.67E-27 | 0.390739   | 0.769 | 0.458 | 7.56E-23 | NSC |
|  | 2.32E-27 | 0.47448747 | 0.965 | 0.79  | 6.58E-23 | NSC |
|  | 1.48E-27 | 0.48308823 | 0.748 | 0.429 | 4.19E-23 | NSC |
|  | 1.43E-27 | 0.52268463 | 0.685 | 0.387 | 4.06E-23 | NSC |
|  | 1.38E-27 | 0.41469448 | 0.282 | 0.075 | 3.90E-23 | NSC |
|  | 1.25E-27 | 0.61366624 | 0.332 | 0.109 | 3.53E-23 | NSC |
|  | 1.21E-27 | 0.46476472 | 0.922 | 0.655 | 3.42E-23 | NSC |
|  | 9.96E-28 | 0.41663112 | 0.937 | 0.671 | 2.82E-23 | NSC |
|  | 8.57E-28 | 0.47143025 | 0.912 | 0.655 | 2.42E-23 | NSC |
|  | 8.49E-28 | 0.41239007 | 0.832 | 0.51  | 2.40E-23 | NSC |
|  | 6.52E-28 | 0.76474392 | 0.644 | 0.369 | 1.85E-23 | NSC |
|  | 6.20E-28 | 0.41778441 | 0.61  | 0.293 | 1.76E-23 | NSC |
|  | 3.37E-28 | 0.50556606 | 0.849 | 0.561 | 9.55E-24 | NSC |
|  | 2.30E-28 | 0.389888   | 0.634 | 0.311 | 6.52E-24 | NSC |
|  | 1.71E-28 | 0.29320943 | 0.448 | 0.168 | 4.84E-24 | NSC |
|  | 1.25E-28 | 0.46511823 | 0.873 | 0.574 | 3.55E-24 | NSC |
|  | 1.13E-28 | 0.48781845 | 0.804 | 0.483 | 3.19E-24 | NSC |
|  | 1.04E-28 | 0.35062011 | 0.744 | 0.406 | 2.94E-24 | NSC |
|  | 9.90E-29 | 0.40913415 | 0.884 | 0.578 | 2.80E-24 | NSC |

|  |          |            |       |       |          |     |
|--|----------|------------|-------|-------|----------|-----|
|  | 8.31E-29 | 0.47503095 | 0.866 | 0.566 | 2.35E-24 | NSC |
|  | 7.31E-29 | 0.74663336 | 0.869 | 0.656 | 2.07E-24 | NSC |
|  | 6.24E-29 | 0.4000755  | 0.853 | 0.516 | 1.77E-24 | NSC |
|  | 5.19E-29 | 0.52904618 | 0.84  | 0.557 | 1.47E-24 | NSC |
|  | 4.76E-29 | 0.34380726 | 0.429 | 0.161 | 1.35E-24 | NSC |
|  | 4.23E-29 | 0.52433388 | 0.746 | 0.411 | 1.20E-24 | NSC |
|  | 2.80E-29 | 0.44666252 | 0.733 | 0.409 | 7.93E-25 | NSC |
|  | 1.53E-29 | 0.27661268 | 0.285 | 0.072 | 4.33E-25 | NSC |
|  | 1.34E-29 | 0.32281028 | 0.181 | 0.022 | 3.79E-25 | NSC |
|  | 1.26E-29 | 0.32284175 | 0.229 | 0.043 | 3.56E-25 | NSC |
|  | 8.48E-30 | 0.44154825 | 0.524 | 0.222 | 2.40E-25 | NSC |
|  | 7.15E-30 | 0.6127503  | 0.646 | 0.328 | 2.02E-25 | NSC |
|  | 5.71E-30 | 0.42783845 | 0.604 | 0.287 | 1.61E-25 | NSC |
|  | 3.13E-30 | 0.49048033 | 0.726 | 0.398 | 8.87E-26 | NSC |
|  | 2.47E-30 | 0.39224604 | 0.597 | 0.278 | 6.99E-26 | NSC |
|  | 2.45E-30 | 0.33821887 | 0.396 | 0.13  | 6.92E-26 | NSC |
|  | 2.42E-30 | 0.45781808 | 0.996 | 0.918 | 6.85E-26 | NSC |
|  | 2.12E-30 | 0.56875261 | 0.821 | 0.481 | 6.00E-26 | NSC |
|  | 2.08E-30 | 0.46927973 | 0.938 | 0.707 | 5.88E-26 | NSC |
|  | 7.50E-31 | 0.48646198 | 0.772 | 0.462 | 2.12E-26 | NSC |
|  | 7.44E-31 | 0.36413345 | 0.437 | 0.158 | 2.11E-26 | NSC |
|  | 5.70E-31 | 0.47689498 | 0.989 | 0.865 | 1.61E-26 | NSC |
|  | 2.67E-31 | 0.53709247 | 0.864 | 0.536 | 7.54E-27 | NSC |
|  | 2.56E-31 | 0.38073418 | 0.653 | 0.314 | 7.25E-27 | NSC |
|  | 2.37E-31 | 0.38609602 | 1     | 0.976 | 6.71E-27 | NSC |
|  | 1.84E-31 | 0.74111114 | 0.782 | 0.501 | 5.20E-27 | NSC |
|  | 1.54E-31 | 0.61807734 | 0.909 | 0.649 | 4.37E-27 | NSC |
|  | 4.27E-32 | 0.48496189 | 0.621 | 0.312 | 1.21E-27 | NSC |
|  | 3.09E-32 | 0.51052335 | 0.767 | 0.44  | 8.74E-28 | NSC |
|  | 2.52E-32 | 0.50951027 | 0.317 | 0.083 | 7.13E-28 | NSC |
|  | 1.42E-32 | 0.53551795 | 0.957 | 0.706 | 4.01E-28 | NSC |
|  | 1.02E-32 | 0.48488272 | 0.983 | 0.825 | 2.88E-28 | NSC |
|  | 2.04E-33 | 0.71992994 | 0.7   | 0.384 | 5.76E-29 | NSC |
|  | 1.27E-33 | 0.57223692 | 0.823 | 0.461 | 3.61E-29 | NSC |
|  | 8.57E-34 | 0.37232598 | 0.354 | 0.099 | 2.43E-29 | NSC |
|  | 6.23E-34 | 0.50019494 | 0.485 | 0.188 | 1.76E-29 | NSC |
|  | 4.89E-34 | 0.60979361 | 0.672 | 0.336 | 1.38E-29 | NSC |
|  | 3.06E-34 | 0.53532407 | 0.394 | 0.123 | 8.67E-30 | NSC |
|  | 1.69E-34 | 0.79744155 | 0.743 | 0.444 | 4.78E-30 | NSC |
|  | 5.99E-35 | 0.61635139 | 0.871 | 0.587 | 1.70E-30 | NSC |
|  | 4.46E-35 | 0.44867572 | 0.7   | 0.332 | 1.26E-30 | NSC |

|  |          |            |       |       |          |     |
|--|----------|------------|-------|-------|----------|-----|
|  | 2.65E-35 | 0.41821221 | 1     | 0.965 | 7.50E-31 | NSC |
|  | 1.21E-35 | 0.63568258 | 0.944 | 0.689 | 3.43E-31 | NSC |
|  | 8.91E-36 | 0.40850911 | 0.414 | 0.132 | 2.52E-31 | NSC |
|  | 7.55E-36 | 0.99765283 | 0.756 | 0.475 | 2.14E-31 | NSC |
|  | 6.34E-36 | 0.4833911  | 0.175 | 0.01  | 1.80E-31 | NSC |
|  | 3.56E-36 | 0.63147664 | 0.849 | 0.545 | 1.01E-31 | NSC |
|  | 3.06E-36 | 0.86143962 | 0.72  | 0.426 | 8.67E-32 | NSC |
|  | 5.25E-37 | 0.56030852 | 0.873 | 0.505 | 1.49E-32 | NSC |
|  | 1.44E-37 | 0.58602994 | 0.972 | 0.82  | 4.07E-33 | NSC |
|  | 6.15E-38 | 0.72128439 | 0.847 | 0.567 | 1.74E-33 | NSC |
|  | 4.34E-38 | 0.61907934 | 0.685 | 0.333 | 1.23E-33 | NSC |
|  | 1.13E-38 | 0.48255911 | 0.457 | 0.149 | 3.21E-34 | NSC |
|  | 5.00E-39 | 0.53647903 | 0.983 | 0.816 | 1.42E-34 | NSC |
|  | 4.23E-39 | 0.41609036 | 0.996 | 0.943 | 1.20E-34 | NSC |
|  | 3.30E-39 | 0.60476811 | 0.825 | 0.514 | 9.34E-35 | NSC |
|  | 1.62E-39 | 0.60278901 | 0.573 | 0.229 | 4.57E-35 | NSC |
|  | 1.43E-39 | 0.63514333 | 0.942 | 0.692 | 4.04E-35 | NSC |
|  | 7.52E-40 | 0.73081466 | 0.675 | 0.326 | 2.13E-35 | NSC |
|  | 1.54E-40 | 0.58583877 | 0.957 | 0.73  | 4.37E-36 | NSC |
|  | 1.00E-40 | 0.54322942 | 0.556 | 0.209 | 2.83E-36 | NSC |
|  | 9.52E-41 | 0.6475646  | 0.903 | 0.584 | 2.69E-36 | NSC |
|  | 3.08E-41 | 0.7412016  | 0.668 | 0.306 | 8.72E-37 | NSC |
|  | 2.16E-41 | 0.62445347 | 0.78  | 0.4   | 6.11E-37 | NSC |
|  | 1.13E-41 | 0.6067303  | 0.993 | 0.858 | 3.19E-37 | NSC |
|  | 1.08E-41 | 0.70774389 | 0.875 | 0.605 | 3.07E-37 | NSC |
|  | 6.98E-42 | 0.54111709 | 0.674 | 0.291 | 1.97E-37 | NSC |
|  | 3.68E-42 | 0.60414838 | 0.784 | 0.413 | 1.04E-37 | NSC |
|  | 2.30E-42 | 0.7333172  | 0.89  | 0.563 | 6.51E-38 | NSC |
|  | 1.97E-42 | 0.50875499 | 1     | 0.923 | 5.59E-38 | NSC |
|  | 9.70E-43 | 0.73708856 | 0.871 | 0.52  | 2.74E-38 | NSC |
|  | 7.46E-43 | 0.51777433 | 0.625 | 0.253 | 2.11E-38 | NSC |
|  | 6.80E-43 | 0.91434094 | 0.843 | 0.555 | 1.93E-38 | NSC |
|  | 4.90E-44 | 0.46595792 | 0.998 | 0.973 | 1.39E-39 | NSC |
|  | 1.18E-44 | 0.69793788 | 0.868 | 0.546 | 3.34E-40 | NSC |
|  | 4.13E-45 | 0.68409151 | 0.955 | 0.719 | 1.17E-40 | NSC |
|  | 3.26E-45 | 0.7541325  | 0.72  | 0.327 | 9.22E-41 | NSC |
|  | 1.68E-45 | 0.6011007  | 0.716 | 0.334 | 4.75E-41 | NSC |
|  | 9.04E-46 | 0.75866331 | 0.882 | 0.56  | 2.56E-41 | NSC |
|  | 2.35E-46 | 0.6330986  | 0.382 | 0.083 | 6.65E-42 | NSC |
|  | 6.29E-47 | 0.67885129 | 0.978 | 0.896 | 1.78E-42 | NSC |
|  | 4.71E-47 | 0.62328557 | 0.722 | 0.326 | 1.33E-42 | NSC |

|  |          |            |       |       |          |     |
|--|----------|------------|-------|-------|----------|-----|
|  | 1.97E-47 | 0.53433885 | 0.711 | 0.308 | 5.58E-43 | NSC |
|  | 1.12E-47 | 0.78067786 | 0.965 | 0.791 | 3.18E-43 | NSC |
|  | 8.59E-48 | 0.74078433 | 0.614 | 0.227 | 2.43E-43 | NSC |
|  | 6.50E-48 | 0.85498102 | 0.328 | 0.056 | 1.84E-43 | NSC |
|  | 2.54E-48 | 0.47044162 | 1     | 0.991 | 7.19E-44 | NSC |
|  | 1.01E-48 | 0.72953092 | 0.974 | 0.791 | 2.85E-44 | NSC |
|  | 8.96E-49 | 0.85103175 | 0.905 | 0.578 | 2.54E-44 | NSC |
|  | 1.67E-50 | 0.61084284 | 0.576 | 0.2   | 4.73E-46 | NSC |
|  | 1.62E-50 | 0.65575123 | 0.769 | 0.342 | 4.59E-46 | NSC |
|  | 8.49E-51 | 0.71872425 | 0.815 | 0.428 | 2.40E-46 | NSC |
|  | 3.17E-51 | 0.86350846 | 0.791 | 0.42  | 8.97E-47 | NSC |
|  | 8.14E-52 | 0.76173945 | 0.812 | 0.395 | 2.30E-47 | NSC |
|  | 7.68E-52 | 0.63820983 | 0.513 | 0.148 | 2.17E-47 | NSC |
|  | 6.74E-52 | 0.73695014 | 0.989 | 0.907 | 1.91E-47 | NSC |
|  | 3.79E-52 | 1.03931018 | 0.629 | 0.236 | 1.07E-47 | NSC |
|  | 1.71E-52 | 0.68358987 | 0.959 | 0.707 | 4.83E-48 | NSC |
|  | 1.31E-52 | 0.54942484 | 0.39  | 0.074 | 3.71E-48 | NSC |
|  | 6.22E-54 | 0.91578022 | 0.556 | 0.171 | 1.76E-49 | NSC |
|  | 6.32E-55 | 0.85013289 | 0.606 | 0.209 | 1.79E-50 | NSC |
|  | 4.07E-57 | 0.94821923 | 0.815 | 0.422 | 1.15E-52 | NSC |
|  | 2.09E-57 | 0.80840811 | 0.938 | 0.636 | 5.91E-53 | NSC |
|  | 2.83E-59 | 0.70801055 | 0.979 | 0.767 | 8.01E-55 | NSC |
|  | 8.58E-62 | 0.44138787 | 1     | 0.993 | 2.43E-57 | NSC |
|  | 7.06E-63 | 1.00377838 | 0.543 | 0.141 | 2.00E-58 | NSC |
|  | 2.00E-63 | 0.85912359 | 0.8   | 0.35  | 5.65E-59 | NSC |
|  | 1.15E-63 | 0.63064125 | 1     | 0.945 | 3.27E-59 | NSC |
|  | 2.42E-65 | 1.02172458 | 0.649 | 0.211 | 6.84E-61 | NSC |
|  | 9.13E-66 | 0.98349546 | 0.64  | 0.199 | 2.58E-61 | NSC |
|  | 1.76E-66 | 0.84791176 | 0.991 | 0.858 | 4.99E-62 | NSC |
|  | 1.23E-66 | 1.04213046 | 0.854 | 0.411 | 3.47E-62 | NSC |
|  | 3.30E-67 | 0.96333015 | 0.996 | 0.927 | 9.35E-63 | NSC |
|  | 1.65E-68 | 1.12333682 | 0.771 | 0.326 | 4.66E-64 | NSC |
|  | 2.69E-69 | 0.62752771 | 0.996 | 0.969 | 7.61E-65 | NSC |
|  | 3.56E-70 | 1.086636   | 0.856 | 0.457 | 1.01E-65 | NSC |
|  | 1.13E-72 | 1.0327821  | 0.875 | 0.435 | 3.19E-68 | NSC |
|  | 6.11E-73 | 0.84448166 | 0.983 | 0.834 | 1.73E-68 | NSC |
|  | 1.10E-75 | 0.65010906 | 1     | 0.983 | 3.11E-71 | NSC |
|  | 8.18E-77 | 1.62737313 | 0.653 | 0.203 | 2.32E-72 | NSC |
|  | 5.22E-77 | 0.90216985 | 0.996 | 0.875 | 1.48E-72 | NSC |
|  | 3.89E-78 | 1.02153092 | 0.597 | 0.125 | 1.10E-73 | NSC |
|  | 3.56E-78 | 1.1560152  | 0.938 | 0.571 | 1.01E-73 | NSC |



|  |           |            |       |       |           |     |
|--|-----------|------------|-------|-------|-----------|-----|
|  | 7.91E-97  | 1.42298803 | 0.84  | 0.295 | 2.24E-92  | NSC |
|  | 6.21E-109 | 0.96726364 | 0.996 | 0.943 | 1.76E-104 | NSC |
|  | 2.56E-119 | 1.43842285 | 1     | 0.937 | 7.25E-115 | NSC |
|  | 2.40E-119 | 1.20089697 | 0.998 | 0.864 | 6.80E-115 | NSC |
|  | 3.44E-139 | 1.76492739 | 0.854 | 0.2   | 9.75E-135 | NSC |

|             |
|-------------|
|             |
| gene        |
| SORBS2      |
| PRTG        |
| RCAN2       |
| CAMK2N1     |
| AR          |
| TTLL7       |
| CREB5       |
| DLGAP1      |
| ITGBL1      |
| CSMD1       |
| SH3GL2      |
| TENM4       |
| AQP1        |
| PHYHD1      |
| PTPRE       |
| ABI3BP      |
| RGMA        |
| ACTN2       |
| GPM6B       |
| WNK2        |
| AC007221.2  |
| GRIN2A      |
| ADAMTS9     |
| MAML2       |
| LRFN5       |
| NAV2        |
| ADCY8       |
| CALCRL      |
| TMEM132E    |
| KCNIP4      |
| AGPAT4      |
| KIT         |
| SYNM        |
| MIR9-3HG    |
| ZDHHC14     |
| MAML3       |
| ADAMTS9-AS2 |
| ARHGAP10    |

|             |
|-------------|
| GPC6        |
| CLVS1       |
| CASK        |
| RHOBTB1     |
| PLP1        |
| ROBO2       |
| ECM2        |
| NT5DC3      |
| MOB3B       |
| FRMD5       |
| DPYD        |
| PTPRD       |
| ITPKB       |
| MYO16       |
| AC079298.3  |
| FREM1       |
| GFPT2       |
| MYRIP       |
| PPP2R2B     |
| L3MBTL4     |
| EXPH5       |
| CFAP47      |
| ABR         |
| DIRC3       |
| GMPR        |
| XIST        |
| CYP4F12     |
| NAV1        |
| PDE4DIP     |
| CTNNA3      |
| ABCA8       |
| NEBL        |
| GRIA3       |
| F5          |
| SLC16A1-AS1 |
| MAN1C1      |
| PLCXD3      |
| GUCY1A1     |
| FRY         |
| NEAT1       |
| GSE1        |

|            |
|------------|
| RTN1       |
| GRIA1      |
| LMNTD1     |
| DCLK2      |
| SMAD9      |
| CERS6      |
| WDR49      |
| SORCS3     |
| COL21A1    |
| TNR        |
| AEBP1      |
| ATP9A      |
| TTN        |
| USH1C      |
| TMCC3      |
| GRIK4      |
| DOCK10     |
| OSBPL3     |
| KIAA1217   |
| PLCE1      |
| IGFBP5     |
| LINC01094  |
| AL603840.1 |
| LINC00609  |
| SLC24A4    |
| MYO5C      |
| CP         |
| LRAT       |
| ITGA2      |
| SORBS1     |
| PIRT       |
| ARHGAP6    |
| CLIP2      |
| NTNG1      |
| MAPT       |
| ARHGEF4    |
| DGKB       |
| SMOC1      |
| APLNR      |
| CYP4F3     |
| 3-Mar      |

|            |
|------------|
| SLC8A3     |
| FP671120.1 |
| RGS6       |
| LINC01411  |
| SPOCK1     |
| SIDT1      |
| BICD1      |
| ST6GAL1    |
| MIR4300HG  |
| VCAN       |
| SPARC      |
| SYNDIG1    |
| DAAM2      |
| HS6ST3     |
| GALNT13    |
| MATN2      |
| PLEKHA5    |
| PRR16      |
| LRRTM4     |
| SNED1      |
| DPP10      |
| KCNN2      |
| FP236383.1 |
| CCDC85A    |
| FYB2       |
| NFASC      |
| ELN        |
| GALNT15    |
| ADAMTSL3   |
| STXBP5L    |
| GFAP       |
| KCNJ3      |
| CD44       |
| TNC        |
| DPP6       |
| AC073941.1 |
| LINC01088  |
| KAZN       |
| SLCO3A1    |
| TSHZ2      |
| LINC00836  |

|            |
|------------|
| SLC38A1    |
| DCLK1      |
| PKN2-AS1   |
| LINC01748  |
| PTCHD1-AS  |
| AC108866.1 |
| FAT3       |
| PPP1R9A    |
| MFHAS1     |
| EFNA5      |
| ZNF804B    |
| PLSCR4     |
| GDAP1      |
| AC113414.1 |
| AC022639.1 |
| TTY14      |
| ROR1       |
| AC005162.3 |
| CTDSPL     |
| ZC3H12C    |
| NEXMIF     |
| BAALC-AS1  |
| WDFY3      |
| DDX17      |
| FKBP5      |
| AC091948.1 |
| STK3       |
| MAP4K4     |
| ACSS3      |
| DANT2      |
| PLPP3      |
| HPSE2      |
| SCFD2      |
| AKAP10     |
| PLSCR1     |
| LINC00886  |
| MAP3K5     |
| CACHD1     |
| NOTCH2     |
| CDC14B     |
| ARHGAP32   |

|              |
|--------------|
| KIAA0319     |
| AC027117.2   |
| UTY          |
| PID1         |
| BAALC        |
| SGIP1        |
| BCL2         |
| EPS15        |
| SCMH1        |
| MKRN3        |
| CDH10        |
| COL23A1      |
| POU6F2       |
| DDX58        |
| NIN          |
| FMNL2        |
| METTLL15     |
| AC098829.1   |
| DOCK4        |
| FNDC3B       |
| AC007402.1   |
| ROBO1        |
| MPPED2       |
| CA8          |
| FAM198B-AS1  |
| AL121760.1   |
| XKR6         |
| TMEM161B-AS1 |
| INTS10       |
| PER3         |
| EAF2         |
| WRN          |
| NCKAP1       |
| MAGI3        |
| CDH11        |
| KIF21A       |
| AC010099.4   |
| MLLT3        |
| INPP4B       |
| LRP1         |
| FBXL7        |

|           |
|-----------|
| ZNF518A   |
| FBXL17    |
| NRF1      |
| MGAT4C    |
| ABCC9     |
| MBNL3     |
| KCTD8     |
| BMPER     |
| SHISA6    |
| TRIM9     |
| FLRT2     |
| HES5      |
| SAMD4A    |
| DDAH1     |
| TRIP12    |
| SLC6A1    |
| PCGF5     |
| LAMA1     |
| CDC14A    |
| KCND3     |
| PGM1      |
| RBM26     |
| WLS       |
| MEF2C     |
| KLF7      |
| ZNF280D   |
| GPSM2     |
| VPS13C    |
| ZFHX4-AS1 |
| TLK1      |
| MAG1      |
| PIK3R1    |
| CDC42BPA  |
| CAMTA1    |
| TRIO      |
| PPM1B     |
| PCTP      |
| PAPLN     |
| KCNIP1    |
| BRINP2    |
| RAB11FIP2 |



|            |
|------------|
| DCUN1D1    |
| C2CD6      |
| ANKDD1A    |
| PDLIM5     |
| MEGF10     |
| CHPT1      |
| EPS8       |
| CSGALNACT1 |
| PPM1K      |
| NTSR2      |
| RALGDS     |
| ZNF827     |
| CU633967.1 |
| UBA6-AS1   |
| AL591686.2 |
| SOX2       |
| SUCLG2-AS1 |
| MYO6       |
| FGF2       |
| SGCD       |
| KAT2B      |
| MED12L     |
| RHOBTB3    |
| ANO5       |
| MIR2052HG  |
| RGL1       |
| BDH1       |
| AL445426.1 |
| ZFP36L2    |
| SLC8A1     |
| POU2F1     |
| ACSS1      |
| PDK4       |
| MGST1      |
| WASF3      |
| FGGY       |
| ENOSF1     |
| CPNE8      |
| MIAT       |
| CEP350     |
| B4GALNT4   |

|            |
|------------|
| SPARCL1    |
| AL136366.1 |
| C3orf70    |
| RNF182     |
| LINC02060  |
| AC125613.1 |
| CGNL1      |
| SDC4       |
| FGFR2      |
| PAMR1      |
| ADAMTS10   |
| FERMT2     |
| SEMA4B     |
| STXBP6     |
| DACH1      |
| RANBP3L    |
| MMP28      |
| HIVEP1     |
| TCF7L2     |
| ATP13A4    |
| HS2ST1     |
| SLC30A10   |
| SASH1      |
| TMEM108    |
| PPP1R12A   |
| GRID1      |
| ORC4       |
| ATP8A1     |
| SHROOM2    |
| NRP2       |
| GJA1       |
| ITGAV      |
| LYVE1      |
| HERPUD2    |
| DECR1      |
| KBTBD12    |
| EEF2K      |
| SETD3      |
| NFAT5      |
| PDE7B      |
| LPAR3      |

|           |
|-----------|
| RIPOR2    |
| PTPN13    |
| TMEM164   |
| PSMG4     |
| NFIA      |
| ANKRD29   |
| NEDD9     |
| TRIM47    |
| SYBU      |
| LRP4      |
| MACROD2   |
| NCAN      |
| C1orf21   |
| HMGN3     |
| LINC00299 |
| GRAMD1B   |
| TMTC2     |
| HIF1A     |
| PRDM16    |
| CHI3L1    |
| FUT10     |
| LAMA3     |
| MOXD1     |
| ETFDH     |
| PLIN5     |
| FTH1      |
| RABGAP1   |
| DGKG      |
| ARHGEF12  |
| GPHN      |
| PHKA1     |
| TENM2     |
| RAB31     |
| SPRED2    |
| EYA1      |
| RGCC      |
| SREBF2    |
| TMOD2     |
| APC       |
| TIPARP    |
| NTRK2     |

|            |
|------------|
| AC079760.1 |
| IL6ST      |
| BMPR1B     |
| AC087564.1 |
| PTCHD1     |
| USP3       |
| SFMBT2     |
| LYN        |
| TLE1       |
| FAM204A    |
| ACSL3      |
| FGD4       |
| SALL3      |
| SFXN5      |
| CHD9       |
| ASRGL1     |
| SNCAIP     |
| TMEM241    |
| PHLPP1     |
| CTNNA2     |
| AGL        |
| PDE5A      |
| AMER2      |
| NDRG1      |
| AC022294.1 |
| MRVI1      |
| GNAQ       |
| FREM2      |
| HES1       |
| PCDH9-AS2  |
| PRR5       |
| CPEB3      |
| ZSWIM6     |
| AMY2B      |
| PLCG1      |
| CPE        |
| GLI2       |
| BCAN       |
| RYR3       |
| BICC1      |
| AC008957.2 |

|           |
|-----------|
| ABI1      |
| AKAP7     |
| GPR37L1   |
| TP53BP2   |
| SHROOM3   |
| TSPOAP1   |
| LRP8      |
| SCARA3    |
| PSMA1     |
| PCDH17    |
| DNAH14    |
| PCDH7     |
| FRMD4A    |
| HEPN1     |
| OSBPL6    |
| GFRA1     |
| SOX9      |
| USP24     |
| ZDHHC21   |
| MCF2L2    |
| FBXO21    |
| ATL2      |
| AASS      |
| CPEB4     |
| FGFR3     |
| WDR17     |
| HS3ST5    |
| CYB5B     |
| MYO10     |
| ESRRG     |
| ATP2C1    |
| ATP1A2    |
| MEF2C-AS1 |
| PTAR1     |
| ARHGAP29  |
| PLEKHG1   |
| SLC6A11   |
| SEL1L3    |
| LRRC4C    |
| INTU      |
| SAT1      |

|            |
|------------|
| NOL4       |
| AC115622.1 |
| CEP85L     |
| KCNMB2-AS1 |
| XAF1       |
| TBC1D10A   |
| STOX1      |
| CDH2       |
| AC090993.1 |
| EPAS1      |
| ELOVL2     |
| NEO1       |
| NID1       |
| TIMP3      |
| CLDN10     |
| CC2D2B     |
| FAM19A1    |
| AC092691.1 |
| LINC00982  |
| SDC2       |
| ST3GAL1    |
| ITPR2      |
| CHKA       |
| LINC00461  |
| ADGRG1     |
| PIK3C2A    |
| LINC02328  |
| NR2F2-AS1  |
| PON2       |
| ACSBG1     |
| LINC00511  |
| OLFM2      |
| MEIS2      |
| MGLL       |
| LGR4       |
| GRIN2C     |
| VEGFA      |
| GRAMD1C    |
| EPB41L2    |
| ABHD2      |
| 7-Sep      |

|            |
|------------|
| RALGAPA2   |
| AC002429.2 |
| GRIA2      |
| FAM171B    |
| MFGE8      |
| NLGN4X     |
| C2orf72    |
| GJB6       |
| FGL1       |
| LINC00500  |
| EPHA4      |
| FSTL5      |
| CD47       |
| GPD2       |
| PDGFRB     |
| HOPX       |
| TNIK       |
| SLC35F1    |
| ITSN1      |
| ASAP2      |
| CSPG5      |
| PTPRZ1     |
| RORB       |
| LHX2       |
| RORA       |
| LRMDA      |
| RGS20      |
| UGP2       |
| GARNL3     |
| SPRY4-AS1  |
| ZFHX4      |
| SYNE1      |
| F3         |
| ENOX1      |
| SEMA4A     |
| PTCH1      |
| SMURF2     |
| ENTPD1     |
| EGLN3      |
| ALDH1L1    |
| UNC5C      |

|            |
|------------|
| CADM2      |
| AC073050.1 |
| TUBB2B     |
| AL589740.1 |
| WIF1       |
| ETNPPL     |
| TPD52L1    |
| ALCAM      |
| OPHN1      |
| GABRA2     |
| DLC1       |
| AL365273.2 |
| ASPH       |
| SOX5       |
| FAM184A    |
| ME1        |
| GLUD1      |
| PDE3B      |
| C1orf61    |
| ABCD2      |
| DNM3       |
| TOX        |
| SPRED1     |
| GABRB1     |
| LMO3       |
| HTRA1      |
| SLC15A2    |
| BRINP3     |
| ADGRL3     |
| EPHB1      |
| EDNRB      |
| DNAH7      |
| LRP1B      |
| ATP1B2     |
| STXBP5     |
| ADAMTS17   |
| OAF        |
| AC091826.2 |
| AKAP12     |
| ADGRV1     |
| RHOJ       |



|            |
|------------|
| SLC1A4     |
| SLC4A4     |
| RBMS3      |
| RERG       |
| PCDH9      |
| NHSL1      |
| PLCB1      |
| GPAM       |
| SH3RF1     |
| MERTK      |
| SLCO1C1    |
| F11-AS1    |
| ETV1       |
| NKAIN3     |
| AF279873.3 |
| MAST4      |
| DIO2       |
| KCNQ3      |
| COL11A1    |
| COL5A3     |
| GLI3       |
| CARMIL1    |
| LSAMP      |
| VAV3       |
| PTN        |
| ADGRB3     |
| NRP1       |
| TMEM132C   |
| RNF219-AS1 |
| EPHA6      |
| SLC1A3     |
| LRRC3B     |
| ERBB4      |
| GNA14      |
| GLUL       |
| PREX2      |
| GPM6A      |
| LINC00499  |
| CADM1      |
| GRM3       |
| CACNB2     |

|          |
|----------|
| ARHGAP24 |
| GPC5     |
| SLC1A2   |
| NRXN1    |
| CABLES1  |
