# Supplementary material
Source: PubMed Central journal article supplement (PMC9343414)
Supplement: 41422_2022_678_MOESM23_ESM.pdf [file 41422_2022_678_MOESM23_ESM.pdf]

**Supplementary information****TableS9: Detailed information of Antibodies used in the study**

| <b>Antibodies</b>                                                      | <b>SOURCE</b>                        |
|------------------------------------------------------------------------|--------------------------------------|
| Mouse monoclonal anti-Ki-67 (clone B56)                                | BD Biosciences                       |
| Rabbit polyclonal anti-Pax-6                                           | BioLegend                            |
| Rabbit polyclonal anti-Doublecortin                                    | Abcam                                |
| Guinea pig polyclonal anti-DCX                                         | Millipore                            |
| Mouse monoclonal anti-NeuN                                             | Millipore                            |
| Rabbit polyclonal GFAP antibody                                        | Abcam                                |
| Rat Anti-BrdU Monoclonal Antibody, Unconjugated, Clone BU1 / 75 (ICR1) | Abcam                                |
| Mouse monoclonal Histone H3 (phospho S10) antibody                     | Abcam                                |
| Mouse monoclonal PCNA antibody                                         | Novus                                |
| Mouse Anti-Polysialic Acid-NCAM (PSA-NCAM) monoclonal antibody         | Millipore                            |
| Mouse monoclonal anti- PSA-NCAM                                        | Developmental Studies Hybridoma Bank |
| Goat polyclonal Sox-2 (Y-17) antibody                                  | Santa Cruz Biotechnology             |
| Rabbit polyclonal anti-ETNPPL                                          | Atlas Antibodies                     |
| Rabbit polyclonal anti-FAM107A                                         | Atlas Antibodies                     |
| Rabbit polyclonal anti-ALDH1A1                                         | Atlas Antibodies                     |
| Rabbit polyclonal anti-MFGE8                                           | Atlas Antibodies                     |
| Rabbit monoclonal Stathmin 1 antibody [EP1573Y]                        | Abcam                                |
| Rabbit STMN2 polyclonal antibody                                       | Thermo Fisher Scientific             |
| Rabbit polyclonal Hop (FL-73) antibody                                 | Santa Cruz Biotechnology             |
| MCM2 (D7G11) XP Rabbit mAb antibody                                    | Cell Signaling Technology            |
| Mouse monoclonal anti-NEUROD1                                          | Abcam                                |
| Mouse monoclonal anti-Calretinin                                       | Swant                                |
| Mouse monoclonal anti-Calbindin                                        | MilliporeSigma                       |
| Rabbit monoclonal anti-p-STAT3                                         | Cell Signaling Technology            |

| <b>IDENTIFIER</b>                |
|----------------------------------|
| Cat# 556003, RRID:AB_396287      |
| Cat# 901301, RRID:AB_2565003     |
| Cat# ab18723, RRID:AB_732011     |
| Cat# AB2253, RRID:AB_1586992     |
| Cat# MAB377, RRID:AB_2298772     |
| Cat# ab7260, RRID:AB_305808      |
| Cat# ab6326, RRID:AB_305426      |
| Cat# ab14955, RRID:AB_443110     |
| Cat# NB500-106, RRID:AB_2252058  |
| Cat# MAB5324, RRID:AB_95211      |
| Cat# 5A5, RRID:AB_528392         |
| Cat# sc-17320, RRID:AB_2286684   |
| Cat# HPA044546, RRID:AB_10962867 |
| Cat# HPA055888, RRID:AB_2682957  |
| Cat# HPA002123, RRID:AB_1844722  |
| Cat# HPA002807, RRID:AB_1078072  |
| Cat# ab52630, RRID:AB_2197257    |
| Cat# 720178, RRID:AB_2606219     |
| Cat# sc-30216, RRID:AB_2120833   |
| Cat# 3619, RRID:AB_2142137       |
| Cat# ab60704, RRID:AB_943491     |
| Cat# 6B3, RRID:AB_10000320       |
| Cat# C9848, RRID:AB_476894       |

Cat# 9145
